# Supplementary material for: Identification of Hammerhead Ribozymes in All Domains of Life Reveals Novel Structural Variations
Source: PubMed Central journal article supplement (PMC3088659; doi:10.1371/journal.pcbi.1002031), 2011-05-05

### A Hammerhead mutant legend

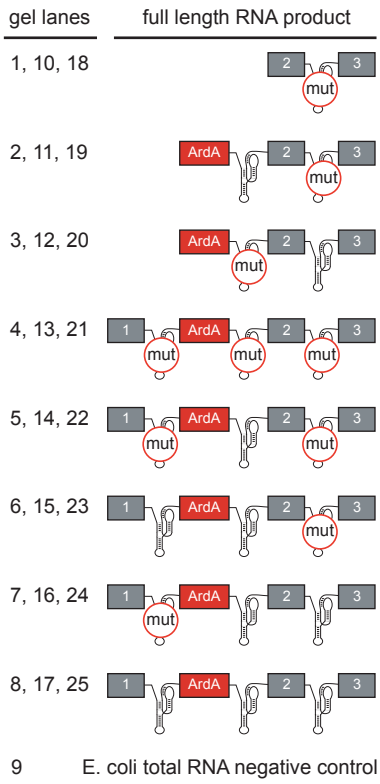

### B

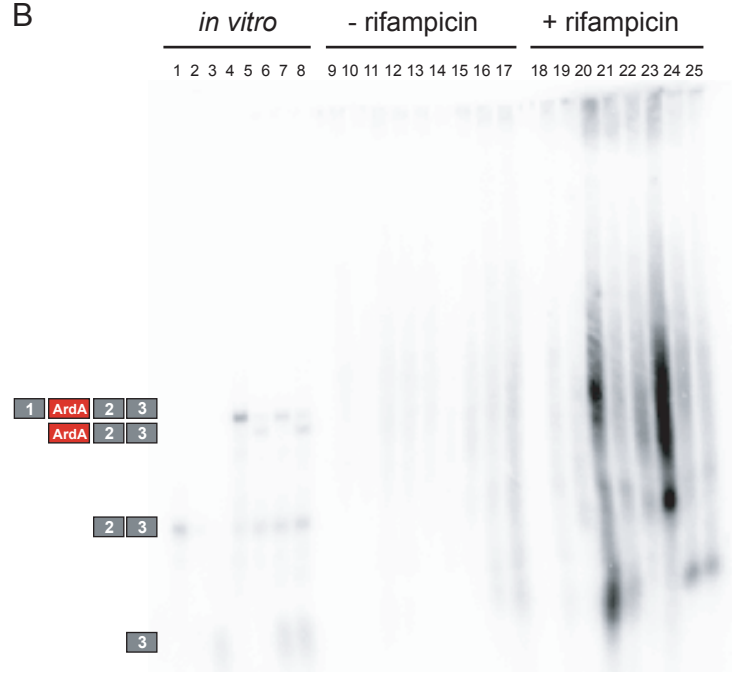

### C

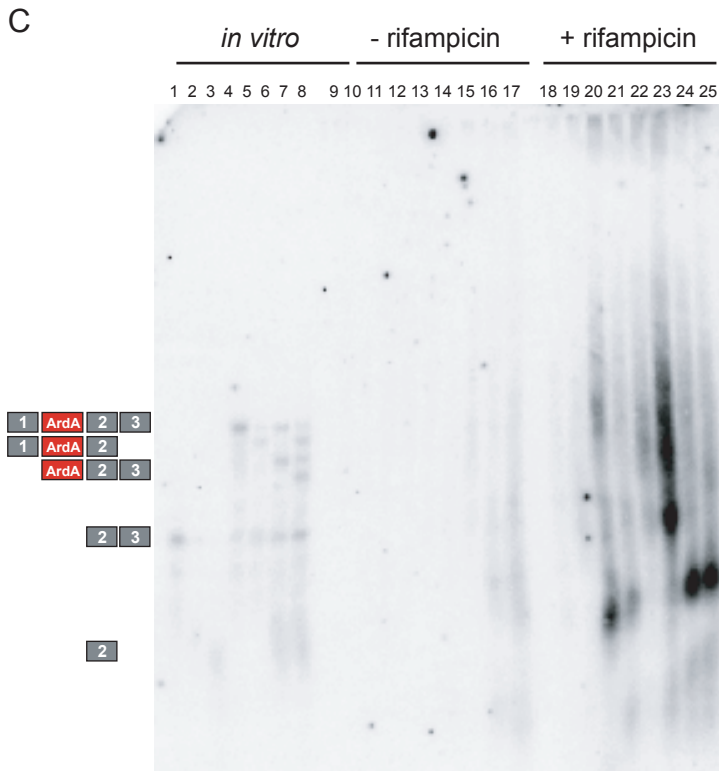

### D

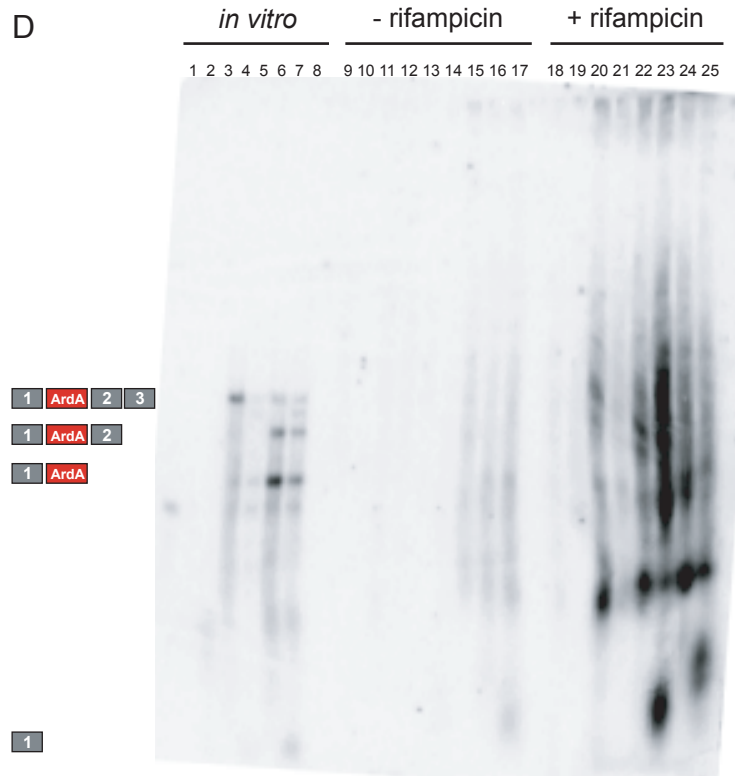

Supplement: pcbi.1002031.s003.pdf [file pcbi.1002031.s003.pdf]
