# Supplementary material for: Identification of Hammerhead Ribozymes in All Domains of Life Reveals Novel Structural Variations
Source: PubMed Central journal article supplement (PMC3088659; doi:10.1371/journal.pcbi.1002031), 2011-05-05

*Xanthomonas*  
phage

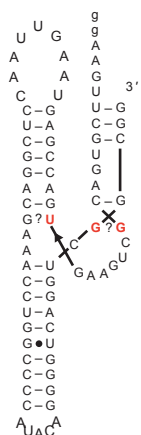

*Aspergillus*

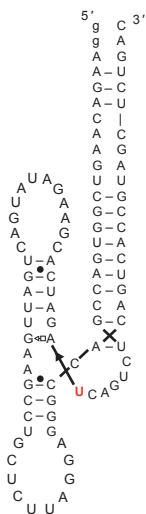

*Renibacterium*  
*salmonirum*

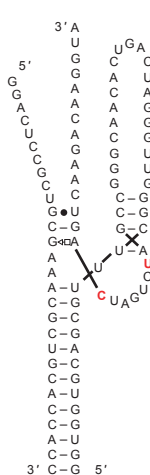

*Faecalibacterium*  
*prauznitzii*  
M21/2

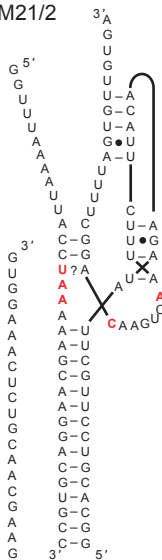

*Aedes*  
*aegypti*

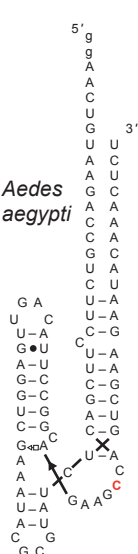

*Bos*  
*taurus*

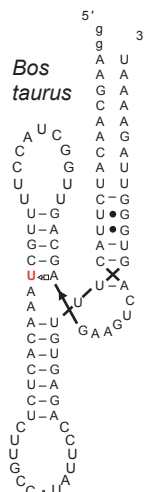

*Macaca*  
*mulata*

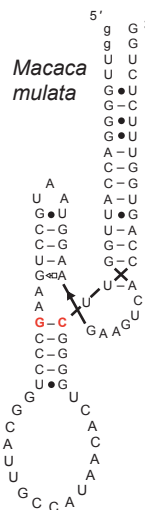

soil metagenomes

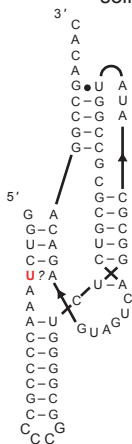

*Monodelphis*  
*domestica*

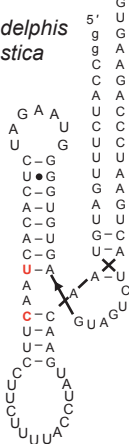

*Aedes aegypti*  
(near transposon)

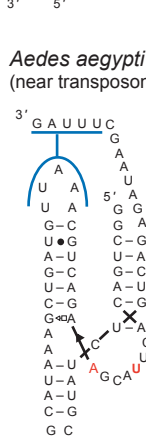

Eggplant viroid

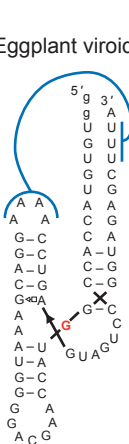

*Burkholderia*  
*ambifaria*  
IOP40-10

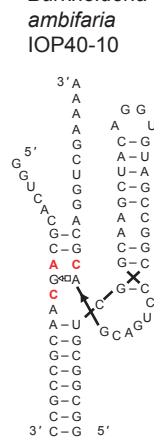

*Yarrowia*  
*lipolytica*

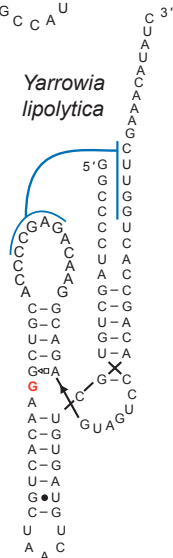

Supplement: pcbi.1002031.s007.pdf [file pcbi.1002031.s007.pdf]
