# Supplementary material for: Identification of Hammerhead Ribozymes in All Domains of Life Reveals Novel Structural Variations
Source: PubMed Central journal article supplement (PMC3088659; doi:10.1371/journal.pcbi.1002031), 2011-05-05

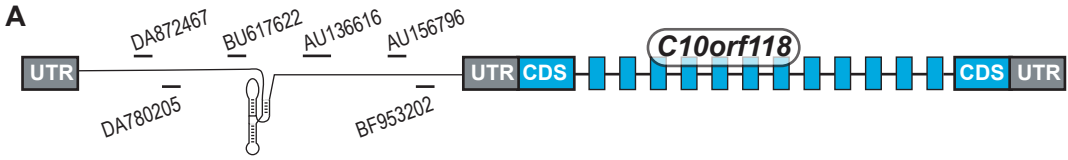

**B**

| TISSUE           | % EST |
|------------------|-------|
| Kidney           | 14    |
| Lung             | 14    |
| Placenta         | 11    |
| Testis           | 9     |
| Uterus           | 8     |
| Brain            | 6     |
| Liver            | 6     |
| Muscle           | 4     |
| Blood            | 4     |
| Lymph Node       | 3     |
| Mammary Gland    | 3     |
| Bone Marrow      | 3     |
| Prostate         | 3     |
| Skin             | 2     |
| Colon            | 2     |
| Heart            | 2     |
| Bladder          | 1     |
| Eye              | 1     |
| Pancreas/Stomach | 1     |

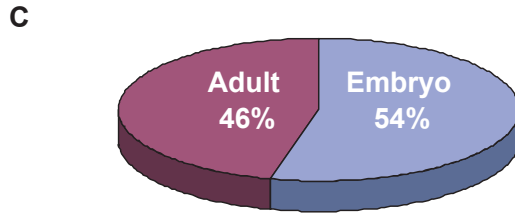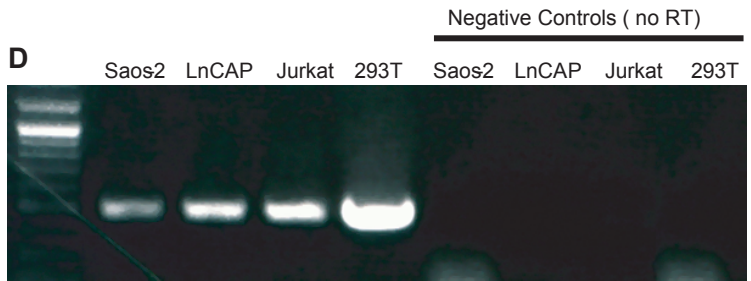

Supplement: pcbi.1002031.s009.pdf [file pcbi.1002031.s009.pdf]
