# Supplementary material for: Identification of Hammerhead Ribozymes in All Domains of Life Reveals Novel Structural Variations
Source: PubMed Central journal article supplement (PMC3088659; doi:10.1371/journal.pcbi.1002031), 2011-05-05
Supplement: pcbi.1002031.s012.pdf [file pcbi.1002031.s012.pdf]

## Supplementary data for:

# Identification of hammerhead ribozymes in all domains of life reveals novel structural variations

Jonathan Perreault<sup>1</sup>, Zasha Weinberg<sup>1,2</sup>, Adam Roth<sup>1,2</sup>, Olivia Popescu<sup>4</sup>, Pascal Chartrand<sup>4</sup>, Gerardo Ferbeyre<sup>4</sup> & Ronald R. Breaker<sup>1-3</sup>

<sup>1</sup>Department of Molecular, Cellular and Developmental Biology, <sup>2</sup>Howard Hughes Medical Institute, <sup>3</sup>Department of Molecular Biophysics and Biochemistry, Yale University, Box 208103, New Haven, CT 06520-8103, USA. <sup>4</sup>Department of Biochemistry, Université de Montréal, 2900 Edouard-Montpetit, Montréal, Québec, Canada H3C 3J7.

Note: the presentation of hammerhead ribozyme alignments in this supplementary data follows the pattern of our presentation of previously found conserved RNA motifs [5].

## Contents

|          |                                                        |            |
|----------|--------------------------------------------------------|------------|
| <b>1</b> | <b>Type I hammerhead ribozymes</b>                     | <b>2</b>   |
| 1.1      | Taxa . . . . .                                         | 2          |
| 1.2      | Nucleotide coordinates . . . . .                       | 3          |
| 1.3      | Multiple-sequence alignment . . . . .                  | 651        |
| <b>2</b> | <b>Type I hammerhead ribozymes, <i>Dolichopoda</i></b> | <b>975</b> |
| 2.1      | Taxa . . . . .                                         | 975        |
| 2.2      | Nucleotide coordinates . . . . .                       | 976        |
| 2.3      | Multiple-sequence alignment . . . . .                  | 980        |
| <b>3</b> | <b>Type II hammerhead ribozymes</b>                    | <b>982</b> |
| 3.1      | Taxa . . . . .                                         | 982        |
| 3.2      | Nucleotide coordinates . . . . .                       | 984        |
| 3.3      | Multiple-sequence alignment . . . . .                  | 990        |
| <b>4</b> | <b>Type III hammerhead ribozymes</b>                   | <b>999</b> |
| 4.1      | Taxa . . . . .                                         | 999        |
| 4.2      | Nucleotide coordinates . . . . .                       | 1001       |
| 4.3      | Multiple-sequence alignment . . . . .                  | 1009       |

# 1 Type I hammerhead ribozymes

## 1.1 Taxa

The taxonomy of each organism containing a putative type I hammerhead ribozyme is listed, with abbreviations identifying each hit (e.g., “Eco-1-1” and “Eco-1-2” might hypothetically represent two distinct RNAs in *E. coli*). The abbreviations will be used to identify each individual type I hammerhead ribozyme in Sections 1.2 and 1.3.

### abbrev. of hits

### taxonomy of species

|                       |                                                                                                                                                                                       |
|-----------------------|---------------------------------------------------------------------------------------------------------------------------------------------------------------------------------------|
| Csy-1-1 to Csy-1-2    | Archaea Thaumarchaeota Cenarchaeales Cenarchaeaceae <i>Cenarchaeum symbiosum</i> A unordered unplaced scaffolds                                                                       |
| Csp-1-1 to Csp-1-2    | Bacteria Cyanobacteria Chroococcales <i>Cyanothece</i> sp. PCC 8802                                                                                                                   |
| Ama-1-1 to Ama-1-2    | Bacteria Cyanobacteria Oscillatoriales <i>Arthrospira maxima</i> CS-328                                                                                                               |
| Mch-1-1 to Mch-1-2    | Bacteria Cyanobacteria Oscillatoriales <i>Microcoleus chthonoplastes</i> PCC 7420                                                                                                     |
| Cpa-1-1               | Bacteria Firmicutes Clostridia Clostridiales Clostridiaceae <i>Clostridium papyrosolvens</i> DSM 2782                                                                                 |
| Cpe-1-1               | Bacteria Firmicutes Clostridia Clostridiales Clostridiaceae <i>Clostridium perfringens</i> ATCC 13124                                                                                 |
| Cpe-2-1               | Bacteria Firmicutes Clostridia Clostridiales Clostridiaceae <i>Clostridium perfringens</i> CPE str. F4969                                                                             |
| Cpe-3-1               | Bacteria Firmicutes Clostridia Clostridiales Clostridiaceae <i>Clostridium perfringens</i> D str. JGS1721                                                                             |
| Cpe-4-1               | Bacteria Firmicutes Clostridia Clostridiales Clostridiaceae <i>Clostridium perfringens</i> E str. JGS1987                                                                             |
| Cpe-5-1               | Bacteria Firmicutes Clostridia Clostridiales Clostridiaceae <i>Clostridium perfringens</i> NCTC 8239                                                                                  |
| Cpe-6-1               | Bacteria Firmicutes Clostridia Clostridiales Clostridiaceae <i>Clostridium perfringens</i> str. 13                                                                                    |
| Dac-1-1 to Dac-1-2    | Bacteria Firmicutes Clostridia Clostridiales Peptococcaceae <i>Desulfotomaculum acetoxidans</i> DSM 771                                                                               |
| Dre-1-1 to Dre-1-3    | Bacteria Firmicutes Clostridia Clostridiales Peptococcaceae <i>Desulfotomaculum reducens</i> MI-1                                                                                     |
| Fpr-1-1 to Fpr-1-2    | Bacteria Firmicutes Clostridia Clostridiales Ruminococcaceae <i>Faecalibacterium prausnitzii</i> M21/2                                                                                |
| Lva-1-1 to Lva-1-2    | Bacteria Firmicutes Lactobacillales Lactobacillaceae <i>Lactobacillus vaginalis</i> ATCC 49540                                                                                        |
| Tsp-1-1               | Bacteria Proteobacteria Alphaproteobacteria Rhodobacterales Rhodobacteraceae <i>Thalassobium</i> <i>Thalassobium</i> sp. R2A62                                                        |
| Gox-1-1               | Bacteria Proteobacteria Alphaproteobacteria Rhodospirillales Acetobacteraceae <i>Gluconobacter oxydans</i> 621H                                                                       |
| Ldr-1-1 to Ldr-1-18   | Bacteria Proteobacteria Gammaproteobacteria Legionellales Legionellaceae <i>Legionella drancourtii</i> LLAP12                                                                         |
| Lpn-1-1 to Lpn-1-5    | Bacteria Proteobacteria Gammaproteobacteria Legionellales Legionellaceae <i>Legionella pneumophila</i> str. Corby                                                                     |
| Lpn-2-1 to Lpn-2-3    | Bacteria Proteobacteria Gammaproteobacteria Legionellales Legionellaceae <i>Legionella pneumophila</i> str. Lens                                                                      |
| Lpn-3-1 to Lpn-3-4    | Bacteria Proteobacteria Gammaproteobacteria Legionellales Legionellaceae <i>Legionella pneumophila</i> str. Paris                                                                     |
| Lpn-4-1 to Lpn-4-2    | Bacteria Proteobacteria Gammaproteobacteria Legionellales Legionellaceae <i>Legionella pneumophila</i> subsp. <i>pneumophila</i> str. Philadelphia 1                                  |
| Ehi-1-1 to Ehi-1-3    | Eukaryota Amoebozoa Archamoebae Entamoebidae <i>Entamoeba histolytica</i> HM-1:IMSS                                                                                                   |
| Tcr-1-1 to Tcr-1-4    | Eukaryota Euglenozoa Kinetoplastida Trypanosomatidae Trypanosoma Schizotrypanum <i>Trypanosoma cruzi</i> strain CL Brener                                                             |
| Nfi-1-1               | Eukaryota Fungi Dikarya Ascomycota Pezizomycotina Eurotiomycetes Eurotiomycetidae Eurotiales Trichocomaceae <i>Neosartorya fischeri</i> NRRL 181                                      |
| Aca-1-1               | Eukaryota Fungi Dikarya Ascomycota Pezizomycotina Eurotiomycetes Eurotiomycetidae Onygenales Ajellomycetaceae <i>Ajellomyces capsulatus</i> NAM1                                      |
| Yli-1-1 to Yli-1-13   | Eukaryota Fungi Dikarya Ascomycota Saccharomycotina Saccharomycetes Saccharomycetales Dipodascaceae <i>Yarrowia lipolytica</i> CLIB122                                                |
| Lbi-1-1 to Lbi-1-3    | Eukaryota Fungi Dikarya Basidiomycota Agaricomycotina Agaricomycetes Agaricomycetidae Agaricales Tricholomataceae <i>Laccaria bicolor</i> S238N-H82                                   |
| Ppl-1-1 to Ppl-1-39   | Eukaryota Fungi Dikarya Basidiomycota Agaricomycotina Agaricomycetes Polyporales <i>Postia placenta</i> Mad-698-R                                                                     |
| Isc-1-1 to Isc-1-55   | Eukaryota Metazoa Arthropoda Chelicerata Arachnida Acari Parasitiformes Ixodida Ixodoidea Ixodidae Ixodinae <i>Ixodes scapularis</i>                                                  |
| Tca-1-1 to Tca-1-14   | Eukaryota Metazoa Arthropoda Hexapoda Insecta Pterygota Neoptera Endopterygota Coleoptera Polyphaga Cucujiformia Tenebrionidae <i>Tribolium castaneum</i>                             |
| Aae-1-1 to Aae-1-4346 | Eukaryota Metazoa Arthropoda Hexapoda Insecta Pterygota Neoptera Endopterygota Diptera Nematocera Culicoidea Culicidae Culicinae Culicini <i>Aedes Stegomyia</i> <i>Aedes aegypti</i> |

|                        |                                                                                                                                                                                                                       |
|------------------------|-----------------------------------------------------------------------------------------------------------------------------------------------------------------------------------------------------------------------|
| Cqu-1-1 to Cqu-1-18    | Eukaryota Metazoa Arthropoda Hexapoda Insecta Pterygota Neoptera Endopterygota Diptera Nematocera Culicoidea Culicidae Culicinae Culicini Culex<br><i>Culex quinquefasciatus</i>                                      |
| Bfl-1-1 to Bfl-1-141   | Eukaryota Metazoa Chordata Cephalochordata Branchiostomidae <i>Branchiostoma floridae</i>                                                                                                                             |
| Gga-1-1 to Gga-1-4     | Eukaryota Metazoa Chordata Craniata Vertebrata Euteleostomi Archosauria Dinosauria Saurischia Theropoda Coelurosauria Aves Neognathae Galliformes<br>Phasianidae Phasianinae <i>Gallus gallus</i>                     |
| Tgu-1-1 to Tgu-1-3     | Eukaryota Metazoa Chordata Craniata Vertebrata Euteleostomi Archosauria Dinosauria Saurischia Theropoda Coelurosauria Aves Neognathae Passeriformes<br>Passeroidea Estrildidae Estrildinae <i>Taeniopygia guttata</i> |
| Mmu-1-1 to Mmu-1-34    | Eukaryota Metazoa Chordata Craniata Vertebrata Euteleostomi Mammalia Eutheria Euarchontoglires Glires Rodentia Sciurognathi Muroidea Muridae<br>Murinae <i>Mus musculus</i>                                           |
| Rno-1-1 to Rno-1-24    | Eukaryota Metazoa Chordata Craniata Vertebrata Euteleostomi Mammalia Eutheria Euarchontoglires Glires Rodentia Sciurognathi Muroidea Muridae<br>Murinae <i>Rattus norvegicus</i>                                      |
| Mmu-2-1 to Mmu-2-13    | Eukaryota Metazoa Chordata Craniata Vertebrata Euteleostomi Mammalia Eutheria Euarchontoglires Primates Haplorrhini Catarrhini Cercopitheciae<br>Cercopithecinae <i>Macaca mulatta</i>                                |
| Hsa-1-1 to Hsa-1-31    | Eukaryota Metazoa Chordata Craniata Vertebrata Euteleostomi Mammalia Eutheria Euarchontoglires Primates Haplorrhini Catarrhini Hominidae <i>Homo sapiens</i>                                                          |
| Ptr-1-1 to Ptr-1-14    | Eukaryota Metazoa Chordata Craniata Vertebrata Euteleostomi Mammalia Eutheria Euarchontoglires Primates Haplorrhini Catarrhini Hominidae <i>Pan troglodytes</i>                                                       |
| Mmu-3-1                | Eukaryota Metazoa Chordata Craniata Vertebrata Euteleostomi Mammalia Eutheria Euarchontoglires Primates Strepsirrhini Lemuriformes Cheirogaleidae<br><i>Microcebus murinus</i>                                        |
| Clu-1-1 to Clu-1-4     | Eukaryota Metazoa Chordata Craniata Vertebrata Euteleostomi Mammalia Eutheria Laurasiatheria Carnivora Caniformia Canidae <i>Canis lupus familiaris</i>                                                               |
| Bta-1-1 to Bta-1-6     | Eukaryota Metazoa Chordata Craniata Vertebrata Euteleostomi Mammalia Eutheria Laurasiatheria Cetartiodactyla Ruminantia Pecora Bovidae Bovinae<br><i>Bos taurus</i>                                                   |
| Ssc-1-1 to Ssc-1-4     | Eukaryota Metazoa Chordata Craniata Vertebrata Euteleostomi Mammalia Eutheria Laurasiatheria Cetartiodactyla Suina Suidae <i>Sus scrofa</i>                                                                           |
| Eca-1-1 to Eca-1-18    | Eukaryota Metazoa Chordata Craniata Vertebrata Euteleostomi Mammalia Eutheria Laurasiatheria Perissodactyla Equidae <i>Equus caballus</i>                                                                             |
| Mdo-1-1 to Mdo-1-26    | Eukaryota Metazoa Chordata Craniata Vertebrata Euteleostomi Mammalia Metatheria Didelphimorphia Didelphidae <i>Monodelphis domestica</i>                                                                              |
| Oan-1-1 to Oan-1-3     | Eukaryota Metazoa Chordata Craniata Vertebrata Euteleostomi Mammalia Monotremata Ornithorhynchidae <i>Ornithorhynchus anatinus</i>                                                                                    |
| Nve-1-1 to Nve-1-472   | Eukaryota Metazoa Cnidaria Anthozoa Hexacorallia Actiniaria Edwardsiidae <i>Nematostella vectensis</i>                                                                                                                |
| Hma-1-1 to Hma-1-8     | Eukaryota Metazoa Cnidaria Hydrozoa Hydroida Anthomedusae Hydridae <i>Hydra magnipapillata</i>                                                                                                                        |
| Spu-1-1 to Spu-1-2     | Eukaryota Metazoa Echinodermata Eleutherozoa Echinozoa Echinoidea Euechinoidea Echinacea Echinoida Strongylocentrotidae <i>Strongylocentrotus purpuratus</i>                                                          |
| Cbr-1-1                | Eukaryota Metazoa Nematoda Chromadorea Rhabditida Rhabditoidea Rhabditidae Peloderinae <i>Caenorhabditis briggsae</i>                                                                                                 |
| Sma-1-1 to Sma-1-25348 | Eukaryota Metazoa Platyhelminthes Trematoda Digenea Strigeidida Schistosomatoidea Schistosomatidae <i>Schistosoma mansoni</i>                                                                                         |
| Cre-1-1                | Eukaryota Viridiplantae Chlorophyta Chlorophyceae Chlamydomonadales Chlamydomonadaceae <i>Chlamydomonas reinhardtii</i>                                                                                               |
| Pph-1-1                | Viruses dsDNA viruses, no RNA stage Caudovirales Podoviridae <i>Pseudomonas phage LUZ24</i>                                                                                                                           |
| Pph-2-1                | Viruses dsDNA viruses, no RNA stage Caudovirales Podoviridae <i>Pseudomonas phage PaP3</i>                                                                                                                            |
| env-1 to env-860       | environmental samples                                                                                                                                                                                                 |

## 1.2 Nucleotide coordinates

Each type I hammerhead ribozyme (indicated by “RNA→”) is listed. The accession number of the sequence containing each type I hammerhead ribozyme is given. Accessions beginning with “NC\_” or “NZ\_” are RefSeq, while other accession refer to environmental samples. Nucleotide coordinates are given for the 5’ and 3’ boundaries

of each. If the 5’ coordinate is greater than the 3’ coordinate, the RNA is present on the reverse-complement strand of the containing genomic DNA sequence. Each hit is denoted by an abbreviation (like “Eco-1-1”) that refers to a taxonomy given in Section 1.1.

| abbrev.  | Seq. accession         |   | 5' at     | 3' at     |
|----------|------------------------|---|-----------|-----------|
| Cpe-6-1  | NC_003366.1            | - | 1736982   | 1736923   |
| Cpe-1-1  | NC_008261.1            | - | 1954659   | 1954600   |
| Cpe-4-1  | NZ_ABDW01000059.1      | - | 340       | 281       |
| Cpe-2-1  | NZ_ABDX01000010.1      | - | 23618     | 23559     |
| Cpe-5-1  | NZ_ABDY01000005.1      | - | 88336     | 88277     |
| Cpe-3-1  | NZ_ABOO01000008.1      | - | 23430     | 23371     |
| Rno-1-1  | NW_047333.1            | - | 928105    | 928049    |
| Rno-1-2  | NW_001084654.1         | - | 7145102   | 7145046   |
| Rno-1-3  | AC_000078.1            | - | 7145102   | 7145046   |
| Rno-1-4  | NC_005109.2            | - | 8225637   | 8225581   |
| Eca-1-1  | NW_001867386.1         | - | 23487315  | 23487244  |
| Eca-1-2  | NC_009144.2            | - | 23487315  | 23487244  |
| Eca-1-3  | NW_001867430.1         | - | 34593780  | 34593721  |
| Eca-1-4  | NC_009151.2            | - | 64725704  | 64725645  |
| env-1    | JCVLSCAF_1096626071977 | - | 1008      | 952       |
| Aae-1-1  | NW_001811181.1         | + | 54911     | 55032     |
| Lbi-1-1  | NW_001889892.1         | + | 660146    | 660216    |
| Lbi-1-2  | NW_001889913.1         | - | 377972    | 377902    |
| Lbi-1-3  | NW_001890030.1         | - | 4645      | 4575      |
| Mdo-1-1  | NW_001581960.1         | - | 1025514   | 1025454   |
| Mdo-1-2  | NC_008804.1            | - | 68092760  | 68092700  |
| Mmu-1-1  | NT_039455.7            | - | 10159831  | 10159779  |
| Mmu-1-2  | NW_001030882.1         | - | 10028774  | 10028722  |
| Mmu-1-3  | AC_000030.1            | - | 13328150  | 13328098  |
| Mmu-1-4  | NC_000074.5            | - | 13159831  | 13159779  |
| Mmu-1-5  | NT_039621.7            | + | 30126088  | 30126150  |
| Mmu-1-6  | NW_001030574.1         | + | 19245086  | 19245148  |
| Mmu-1-7  | AC_000037.1            | + | 70529623  | 70529685  |
| Mmu-1-8  | NC_000081.5            | + | 68840084  | 68840146  |
| Ptr-1-1  | NW_001234074.1         | + | 27790578  | 27790647  |
| Ptr-1-2  | NC_006471.2            | + | 110514165 | 110514234 |
| Hsa-1-1  | NT_016354.19           | + | 32585791  | 32585860  |
| Hsa-1-2  | NW_922162.1            | + | 55161944  | 55162013  |
| Hsa-1-3  | NW_001838915.1         | + | 32534370  | 32534439  |
| Hsa-1-4  | NC_000004.11           | + | 108038070 | 108038139 |
| Hsa-1-5  | AC_000047.1            | + | 105336970 | 105337039 |
| Hsa-1-6  | AC_000136.1            | + | 103772820 | 103772889 |
| Tca-1-1  | NC_007422.2            | + | 17720930  | 17720989  |
| Tca-1-2  | NW_001092856.1         | + | 919247    | 919306    |
| Mmu-1-9  | NT_096135.5            | - | 45986807  | 45986744  |
| Mmu-1-10 | NW_001030424.1         | - | 2351235   | 2351172   |
| Mmu-1-11 | AC_000033.1            | - | 90306699  | 90306636  |
| Mmu-1-12 | NC_000077.5            | - | 80481929  | 80481866  |
| Rno-1-5  | NW_047394.1            | + | 1959724   | 1959794   |
| Rno-1-6  | NW_001084685.1         | + | 1613621   | 1613691   |
| Rno-1-7  | AC_000081.1            | + | 40790678  | 40790748  |
| Rno-1-8  | NC_005112.2            | + | 41847501  | 41847571  |
| Mmu-2-1  | NW_001120965.1         | - | 6596314   | 6596239   |
| Mmu-2-2  | NC_007863.1            | - | 53882575  | 53882500  |
| Eca-1-5  | NW_001867402.1         | - | 33850523  | 33850466  |
| Eca-1-6  | NC_009145.2            | - | 33850523  | 33850466  |

|          |                        |   |           |           |
|----------|------------------------|---|-----------|-----------|
| Mdo-1-3  | NW_001582019.1         | - | 3891955   | 3891896   |
| Mdo-1-4  | NC_008808.1            | - | 128975719 | 128975660 |
| Mdo-1-5  | NW_001581945.1         | + | 5882622   | 5882682   |
| Mdo-1-6  | NC_008804.1            | + | 395491444 | 395491504 |
| Bff-1-1  | NW_002235018.1         | + | 1403922   | 1403984   |
| Mmu-2-3  | NW_001095188.1         | + | 354408    | 354475    |
| Mmu-2-4  | NC_007867.1            | + | 89580790  | 89580857  |
| env-2    | JCVLSCAF_1096628065006 | + | 1603      | 1701      |
| Eca-1-7  | NW_001867435.1         | - | 11661067  | 11660990  |
| Eca-1-8  | NC_009152.2            | - | 52476376  | 52476299  |
| Aca-1-1  | NW_001813982.1         | - | 4396550   | 4396479   |
| Yli-1-1  | NC_006069.1            | - | 3040259   | 3040150   |
| Aae-1-2  | NW_001810458.1         | + | 771543    | 771630    |
| env-3    | JCVLSCAF_1096627828063 | + | 566       | 624       |
| Mmu-2-5  | NW_001124215.1         | + | 4773788   | 4773853   |
| Mmu-2-6  | NC_007866.1            | + | 81403896  | 81403961  |
| env-4    | ABMG01116745           | + | 18        | 79        |
| Hsa-1-7  | NT_008413.18           | - | 27125614  | 27125555  |
| Hsa-1-8  | NW_924062.1            | - | 26948290  | 26948231  |
| Hsa-1-9  | NW_001839149.2         | + | 8780093   | 8780152   |
| Hsa-1-10 | NC_000009.11           | - | 27135614  | 27135555  |
| Hsa-1-11 | AC_000052.1            | - | 27063771  | 27063712  |
| Hsa-1-12 | AC_000141.1            | - | 27088128  | 27088069  |
| Hsa-1-13 | NG_011828.1            | - | 31468     | 31409     |
| Ptr-1-3  | NW_001240439.1         | - | 26940286  | 26940227  |
| Ptr-1-4  | NC_006476.2            | - | 27735512  | 27735453  |
| Aae-1-3  | NW_001811100.1         | - | 685711    | 685657    |
| Aae-1-4  | NW_001810556.1         | - | 164829    | 164761    |
| Rno-1-9  | NW_047491.1            | - | 14469586  | 14469502  |
| Rno-1-10 | NW_001084723.1         | - | 21650130  | 21650046  |
| Rno-1-11 | AC_000085.1            | - | 33246296  | 33246212  |
| Rno-1-12 | NC_005116.2            | - | 40153424  | 40153340  |
| env-5    | AATC01003456           | + | 575       | 633       |
| env-6    | AATF01005847           | + | 564       | 622       |
| Mmu-2-7  | NW_001120996.1         | - | 573348    | 573290    |
| Mmu-2-8  | NC_007863.1            | - | 167461387 | 167461329 |
| Eca-1-9  | NW_001867383.1         | - | 9179931   | 9179865   |
| Eca-1-10 | NC_009160.2            | - | 26931156  | 26931090  |
| env-7    | JCVLSCAF_1096627611910 | + | 29        | 88        |
| Nve-1-1  | NW_001834101.1         | + | 37894     | 37950     |
| env-8    | JCVLSCAF_1101667066268 | - | 105       | 44        |
| Bff-1-2  | NW_002235192.1         | - | 920381    | 920330    |
| Bff-1-3  | NW_002235002.1         | - | 1544210   | 1544159   |
| Ptr-1-5  | NW_001224596.1         | + | 2857779   | 2857830   |
| Ptr-1-6  | NC_006481.2            | + | 23923366  | 23923417  |
| Hsa-1-14 | NT_026437.12           | + | 6474153   | 6474204   |
| Hsa-1-15 | NW_925539.1            | + | 5280733   | 5280784   |
| Hsa-1-16 | NW_001838110.1         | + | 5277004   | 5277055   |
| Hsa-1-17 | NC_000014.8            | + | 25474153  | 25474204  |
| Hsa-1-18 | AC_000057.1            | + | 5338611   | 5338662   |
| Hsa-1-19 | AC_000146.1            | + | 5588180   | 5588231   |
| Lva-1-1  | NZ_GG693413.1          | - | 68804     | 68721     |

|          |                         |   |           |           |
|----------|-------------------------|---|-----------|-----------|
| Lva-1-2  | NZ_ACGV01000018.1       | - | 59000     | 58917     |
| env-9    | JCVLSCAF_1096626877834  | - | 112       | 48        |
| Oan-1-1  | NW_001794261.1          | - | 5909438   | 5909386   |
| Ptr-1-7  | NW_001220645.1          | + | 4579043   | 4579123   |
| Ptr-1-8  | NC_006477.2             | + | 14362691  | 14362771  |
| Nve-1-2  | NW_001834151.1          | + | 29700     | 29773     |
| env-10   | JCVLSCAF_1101668548346  | - | 514       | 449       |
| Ssc-1-1  | NW_001885478.1          | - | 560326    | 560267    |
| Ssc-1-2  | NC_010456.1             | - | 63994886  | 63994827  |
| Nve-1-3  | NW_001832879.1          | - | 12544     | 12493     |
| env-11   | JCVLSCAF_1101667237532  | - | 103       | 43        |
| Aae-1-5  | NW_001809931.1          | - | 30773     | 30721     |
| Mch-1-1  | NZ_DS989859.1           | - | 143982    | 143921    |
| Mch-1-2  | NZ_DS989859.1           | - | 143751    | 143690    |
| Mmu-1-13 | NT_039169.7             | + | 6062852   | 6062898   |
| Mmu-1-14 | NC_000067.5             | + | 9062852   | 9062898   |
| Mmu-1-15 | NT_039606.7             | - | 54514931  | 54514885  |
| Mmu-1-16 | NW_001030560.1          | - | 27631387  | 27631341  |
| Mmu-1-17 | AC_000036.1             | - | 79172763  | 79172717  |
| Mmu-1-18 | NC_000080.5             | - | 82079887  | 82079841  |
| Mmu-1-19 | NW_001030678.1          | - | 15271253  | 15271207  |
| Mmu-1-20 | NT_039189.7             | - | 5959476   | 5959430   |
| Mmu-1-21 | AC_000023.1             | - | 196378552 | 196378506 |
| Mmu-1-22 | NC_000067.5             | - | 191287286 | 191287240 |
| Rno-1-13 | NW_047713.2             | - | 13152649  | 13152561  |
| Rno-1-14 | NW_001084839.1          | - | 5451615   | 5451527   |
| Rno-1-15 | AC_000073.1             | - | 71811940  | 71811852  |
| Rno-1-16 | NC_005104.2             | - | 76190015  | 76189927  |
| Nve-1-4  | NW_001833940.1          | + | 118684    | 118758    |
| Nve-1-5  | NW_001834402.1          | - | 1712580   | 1712531   |
| Bff-1-4  | NW_002235303.1          | - | 278156    | 278107    |
| Bff-1-5  | NW_002234937.1          | - | 1387222   | 1387150   |
| Bff-1-6  | NW_002235698.1          | - | 50668     | 50619     |
| Cbr-1-1  | NZ_CAAAC02000557.1      | + | 235864    | 235932    |
| Bff-1-7  | NW_002235056.1          | + | 1513921   | 1513978   |
| env-12   | AF404073.1              | + | 70        | 162       |
| Yli-1-2  | NC_006067.1             | - | 904542    | 904463    |
| Cre-1-1  | NW_001843559.1          | + | 8061      | 8112      |
| Mdo-1-7  | NW_001581961.1          | - | 123960601 | 123960518 |
| Mdo-1-8  | NC_008804.1             | - | 235356879 | 235356796 |
| Mdo-1-9  | NW_001581837.1          | - | 102199877 | 102199829 |
| Mdo-1-10 | NC_008801.1             | - | 393908091 | 393908043 |
| Mdo-1-11 | NW_001581875.1          | - | 23404358  | 23404300  |
| Mdo-1-12 | NC_008802.1             | - | 215826348 | 215826290 |
| Mdo-1-13 | NW_001581837.1          | + | 54493717  | 54493817  |
| Mdo-1-14 | NC_008801.1             | + | 346201931 | 346202031 |
| Mdo-1-15 | NW_001581968.1          | - | 12002893  | 12002791  |
| Mdo-1-16 | NC_008805.1             | - | 74315481  | 74315379  |
| Isc-1-1  | NW_002824129.1          | - | 72721     | 72656     |
| env-13   | NCBI_READ_1113264282865 | - | 637       | 587       |
| env-14   | JCVLSCAF_1101668047413  | - | 997       | 930       |
| env-15   | JCVLSCAF_1096627788695  | - | 761       | 702       |

|          |                        |   |           |           |
|----------|------------------------|---|-----------|-----------|
| Nve-1-6  | NW_001834389.1         | + | 687022    | 687076    |
| env-16   | JCVLSCAF_1101667068912 | + | 589       | 645       |
| Gox-1-1  | NC_006672.1            | - | 30953     | 30888     |
| Tca-1-3  | NW_001094031.1         | - | 87520     | 87471     |
| Tca-1-4  | NW_001094218.1         | - | 5866      | 5817      |
| Tca-1-5  | NC_007423.2            | + | 15903578  | 15903627  |
| Tca-1-6  | NC_007423.2            | - | 15901649  | 15901600  |
| Tca-1-7  | NW_001092880.1         | + | 387573    | 387622    |
| Tca-1-8  | NW_001092880.1         | - | 385644    | 385595    |
| env-17   | JCVLSCAF_1101668243010 | - | 104       | 44        |
| Eca-1-11 | NW_001867411.1         | - | 41716761  | 41716704  |
| Eca-1-12 | NC_009146.2            | - | 78308854  | 78308797  |
| env-18   | ABMJ01021607           | + | 18        | 83        |
| Hma-1-1  | NW_002158257.1         | + | 3410      | 3458      |
| env-19   | JCVLSCAF_1096626865527 | + | 904       | 980       |
| Dre-1-1  | NC_009253.1            | + | 936444    | 936503    |
| Dre-1-2  | NC_009253.1            | + | 949822    | 949881    |
| env-20   | JCVLSCAF_1096627143383 | - | 1314      | 1250      |
| Tsp-1-1  | NZ_GG697169.2          | + | 1013719   | 1013788   |
| env-21   | AATD01009237           | - | 532       | 476       |
| env-22   | ABOF01011406           | + | 59        | 114       |
| env-23   | ABOF01029488           | - | 72        | 17        |
| env-24   | ABOF01069025           | + | 11        | 68        |
| env-25   | ABOF01085622           | + | 11        | 70        |
| Csp-1-1  | NC_013161.1            | + | 4417484   | 4417544   |
| Csp-1-2  | NC_013161.1            | - | 2113048   | 2112988   |
| env-26   | JCVLSCAF_1096627138737 | + | 1289      | 1347      |
| Spu-1-1  | NW_001336952.1         | + | 240937    | 240982    |
| Spu-1-2  | NW_001460378.1         | - | 448095    | 448050    |
| Mmu-2-9  | NW_001112573.1         | + | 8745039   | 8745101   |
| Mmu-2-10 | NC_007859.1            | + | 174924195 | 174924257 |
| env-27   | ABEF01004833.1         | + | 538       | 592       |
| Nve-1-7  | NW_001834191.1         | - | 53497     | 53451     |
| Nve-1-8  | NW_001834276.1         | - | 439310    | 439262    |
| Nve-1-9  | NW_001834169.1         | - | 281815    | 281767    |
| Nve-1-10 | NW_001834206.1         | - | 139606    | 139558    |
| Nve-1-11 | NW_001832211.1         | + | 5486      | 5534      |
| Nve-1-12 | NW_001834353.1         | - | 96753     | 96705     |
| Nve-1-13 | NW_001833676.1         | - | 40169     | 40117     |
| Nve-1-14 | NW_001833879.1         | + | 23149     | 23201     |
| Nve-1-15 | NW_001832688.1         | - | 6977      | 6929      |
| Nve-1-16 | NW_001834177.1         | - | 112975    | 112927    |
| Nve-1-17 | NW_001834177.1         | - | 110507    | 110459    |
| Nve-1-18 | NW_001834186.1         | - | 105909    | 105861    |
| Nve-1-19 | NW_001834203.1         | - | 147832    | 147784    |
| Nve-1-20 | NW_001834365.1         | - | 465701    | 465653    |
| Nve-1-21 | NW_001834411.1         | - | 523280    | 523232    |
| Nve-1-22 | NW_001834408.1         | + | 295362    | 295410    |
| Nve-1-23 | NW_001834346.1         | + | 314703    | 314751    |
| Nve-1-24 | NW_001834329.1         | + | 93558     | 93606     |
| Nve-1-25 | NW_001834297.1         | - | 446454    | 446406    |
| Nve-1-26 | NW_001834382.1         | - | 69837     | 69789     |

|          |                |   |        |        |
|----------|----------------|---|--------|--------|
| Nve-1-27 | NW_001834038.1 | + | 27186  | 27234  |
| Nve-1-28 | NW_001834401.1 | + | 235899 | 235947 |
| Nve-1-29 | NW_001834260.1 | - | 327050 | 327002 |
| Nve-1-30 | NW_001834272.1 | + | 401494 | 401542 |
| Nve-1-31 | NW_001834033.1 | + | 34539  | 34587  |
| Nve-1-32 | NW_001834348.1 | + | 965007 | 965055 |
| Nve-1-33 | NW_001833924.1 | - | 27842  | 27794  |
| Nve-1-34 | NW_001834158.1 | + | 300618 | 300666 |
| Nve-1-35 | NW_001834207.1 | + | 57374  | 57422  |
| Nve-1-36 | NW_001834318.1 | - | 92780  | 92732  |
| Nve-1-37 | NW_001833878.1 | - | 50705  | 50657  |
| Nve-1-38 | NW_001834118.1 | + | 101421 | 101469 |
| Nve-1-39 | NW_001834118.1 | + | 107965 | 108013 |
| Nve-1-40 | NW_001827127.1 | + | 679    | 727    |
| Nve-1-41 | NW_001829216.1 | - | 342    | 294    |
| Nve-1-42 | NW_001832725.1 | + | 1884   | 1932   |
| Nve-1-43 | NW_001833119.1 | + | 25151  | 25199  |
| Nve-1-44 | NW_001833259.1 | + | 716    | 764    |
| Nve-1-45 | NW_001833893.1 | - | 58171  | 58123  |
| Nve-1-46 | NW_001833893.1 | - | 53819  | 53771  |
| Nve-1-47 | NW_001833934.1 | + | 73678  | 73726  |
| Nve-1-48 | NW_001833960.1 | + | 74840  | 74888  |
| Nve-1-49 | NW_001833965.1 | - | 101421 | 101373 |
| Nve-1-50 | NW_001833984.1 | - | 133825 | 133777 |
| Nve-1-51 | NW_001834019.1 | - | 136702 | 136654 |
| Nve-1-52 | NW_001834021.1 | + | 112378 | 112426 |
| Nve-1-53 | NW_001834021.1 | + | 119897 | 119945 |
| Nve-1-54 | NW_001834029.1 | + | 97437  | 97485  |
| Nve-1-55 | NW_001834029.1 | - | 97367  | 97319  |
| Nve-1-56 | NW_001834033.1 | + | 12618  | 12666  |
| Nve-1-57 | NW_001834043.1 | - | 66703  | 66655  |
| Nve-1-58 | NW_001834065.1 | + | 35426  | 35474  |
| Nve-1-59 | NW_001834067.1 | + | 8299   | 8347   |
| Nve-1-60 | NW_001834095.1 | + | 170931 | 170979 |
| Nve-1-61 | NW_001834107.1 | + | 221670 | 221718 |
| Nve-1-62 | NW_001834162.1 | - | 126344 | 126296 |
| Nve-1-63 | NW_001834164.1 | + | 109286 | 109334 |
| Nve-1-64 | NW_001834175.1 | - | 35664  | 35616  |
| Nve-1-65 | NW_001834180.1 | + | 146551 | 146599 |
| Nve-1-66 | NW_001834208.1 | - | 148078 | 148030 |
| Nve-1-67 | NW_001834225.1 | - | 355330 | 355282 |
| Nve-1-68 | NW_001834231.1 | - | 20406  | 20358  |
| Nve-1-69 | NW_001834245.1 | - | 264280 | 264232 |
| Nve-1-70 | NW_001834251.1 | - | 184251 | 184203 |
| Nve-1-71 | NW_001834260.1 | + | 313709 | 313757 |
| Nve-1-72 | NW_001834262.1 | - | 67149  | 67101  |
| Nve-1-73 | NW_001834288.1 | - | 105828 | 105780 |
| Nve-1-74 | NW_001834293.1 | - | 624154 | 624106 |
| Nve-1-75 | NW_001834299.1 | + | 70813  | 70861  |
| Nve-1-76 | NW_001834307.1 | - | 687855 | 687807 |
| Nve-1-77 | NW_001834315.1 | - | 63597  | 63549  |
| Nve-1-78 | NW_001834322.1 | + | 231546 | 231594 |



|           |                |   |         |         |
|-----------|----------------|---|---------|---------|
| Nve-1-79  | NW_001834330.1 | - | 819773  | 819725  |
| Nve-1-80  | NW_001834354.1 | - | 374285  | 374237  |
| Nve-1-81  | NW_001834365.1 | + | 466820  | 466868  |
| Nve-1-82  | NW_001834369.1 | - | 912884  | 912836  |
| Nve-1-83  | NW_001834371.1 | - | 1147366 | 1147318 |
| Nve-1-84  | NW_001834377.1 | - | 196301  | 196253  |
| Nve-1-85  | NW_001834381.1 | + | 1163611 | 1163659 |
| Nve-1-86  | NW_001834386.1 | + | 28169   | 28217   |
| Nve-1-87  | NW_001834387.1 | - | 610041  | 609993  |
| Nve-1-88  | NW_001834387.1 | - | 604699  | 604651  |
| Nve-1-89  | NW_001834389.1 | + | 68403   | 68451   |
| Nve-1-90  | NW_001834390.1 | + | 1425429 | 1425477 |
| Nve-1-91  | NW_001834391.1 | + | 1110891 | 1110939 |
| Nve-1-92  | NW_001834391.1 | + | 1568257 | 1568305 |
| Nve-1-93  | NW_001834391.1 | - | 329932  | 329884  |
| Nve-1-94  | NW_001834393.1 | - | 1246968 | 1246920 |
| Nve-1-95  | NW_001834400.1 | - | 442413  | 442365  |
| Nve-1-96  | NW_001834404.1 | + | 99281   | 99329   |
| Nve-1-97  | NW_001834405.1 | + | 320938  | 320986  |
| Nve-1-98  | NW_001834406.1 | - | 976622  | 976574  |
| Nve-1-99  | NW_001834411.1 | - | 2333090 | 2333042 |
| Nve-1-100 | NW_001834411.1 | - | 1606372 | 1606324 |
| Nve-1-101 | NW_001834413.1 | + | 2026980 | 2027028 |
| Nve-1-102 | NW_001834413.1 | + | 2627025 | 2627073 |
| Nve-1-103 | NW_001834359.1 | + | 816147  | 816195  |
| Nve-1-104 | NW_001834359.1 | - | 176822  | 176774  |
| Nve-1-105 | NW_001834407.1 | + | 845580  | 845637  |
| Nve-1-106 | NW_001834410.1 | + | 2240979 | 2241028 |
| Nve-1-107 | NW_001832034.1 | + | 2398    | 2446    |
| Nve-1-108 | NW_001834377.1 | - | 220011  | 219963  |
| Nve-1-109 | NW_001834049.1 | + | 143154  | 143202  |
| Nve-1-110 | NW_001834187.1 | - | 86617   | 86569   |
| Nve-1-111 | NW_001834411.1 | - | 1530887 | 1530839 |
| Nve-1-112 | NW_001833545.1 | + | 1388    | 1436    |
| Nve-1-113 | NW_001833861.1 | + | 98460   | 98508   |
| Nve-1-114 | NW_001834289.1 | - | 54828   | 54766   |
| Nve-1-115 | NW_001833955.1 | - | 9139    | 9077    |
| Nve-1-116 | NW_001834216.1 | - | 413097  | 413035  |
| Nve-1-117 | NW_001833993.1 | - | 30617   | 30556   |
| Nve-1-118 | NW_001834413.1 | - | 2219508 | 2219446 |
| Nve-1-119 | NW_001834107.1 | + | 221723  | 221769  |
| Nve-1-120 | NW_001831903.1 | + | 7624    | 7688    |
| Nve-1-121 | NW_001834340.1 | + | 351469  | 351531  |
| Nve-1-122 | NW_001834358.1 | + | 511716  | 511778  |
| Nve-1-123 | NW_001834129.1 | + | 1963    | 2025    |
| Nve-1-124 | NW_001833676.1 | - | 38534   | 38472   |
| Nve-1-125 | NW_001830649.1 | + | 8133    | 8195    |
| Nve-1-126 | NW_001834198.1 | + | 135861  | 135923  |
| Nve-1-127 | NW_001834311.1 | + | 634612  | 634674  |
| Nve-1-128 | NW_001834405.1 | - | 1735942 | 1735880 |
| Nve-1-129 | NW_001834393.1 | - | 1349745 | 1349683 |
| Nve-1-130 | NW_001834360.1 | - | 254958  | 254896  |

|           |                |   |         |         |
|-----------|----------------|---|---------|---------|
| Nve-1-131 | NW_001834395.1 | + | 1233585 | 1233647 |
| Nve-1-132 | NW_001834372.1 | + | 1088730 | 1088787 |
| Nve-1-133 | NW_001834393.1 | + | 6773    | 6832    |
| Nve-1-134 | NW_001834413.1 | - | 2221116 | 2221061 |
| env-28    | Z69686.1       | + | 342     | 390     |
| env-29    | Z69687.1       | + | 342     | 390     |
| env-30    | Z69696.1       | + | 341     | 389     |
| env-31    | Z69695.1       | + | 345     | 393     |
| env-32    | Z69690.1       | + | 342     | 390     |
| env-33    | Z69692.1       | + | 343     | 391     |
| env-34    | Z69702.1       | + | 341     | 389     |
| env-35    | Z69685.1       | + | 342     | 390     |
| env-36    | Z69698.1       | + | 341     | 389     |
| env-37    | Z69703.1       | + | 343     | 391     |
| env-38    | Z69691.1       | + | 342     | 390     |
| Bff-1-8   | NW_002236005.1 | + | 44684   | 44733   |
| Bff-1-9   | NW_002235311.1 | - | 594286  | 594233  |
| Bff-1-10  | NW_002235437.1 | + | 478966  | 479019  |
| Bff-1-11  | NW_002236089.1 | + | 23529   | 23582   |
| Bff-1-12  | NW_002235437.1 | - | 478397  | 478344  |
| Bff-1-13  | NW_002234988.1 | + | 1729540 | 1729593 |
| Bff-1-14  | NW_002235496.1 | + | 3730    | 3783    |
| Bff-1-15  | NW_002234960.1 | + | 55181   | 55234   |
| Bff-1-16  | NW_002234936.1 | + | 5855582 | 5855635 |
| Bff-1-17  | NW_002234936.1 | - | 5855262 | 5855209 |
| Bff-1-18  | NW_002234941.1 | + | 2988548 | 2988601 |
| Bff-1-19  | NW_002234943.1 | + | 2360458 | 2360511 |
| Bff-1-20  | NW_002234943.1 | - | 2360111 | 2360058 |
| Bff-1-21  | NW_002234950.1 | + | 3266742 | 3266795 |
| Bff-1-22  | NW_002234951.1 | + | 858421  | 858474  |
| Bff-1-23  | NW_002234951.1 | - | 855884  | 855831  |
| Bff-1-24  | NW_002234962.1 | + | 134701  | 134754  |
| Bff-1-25  | NW_002234966.1 | + | 3468489 | 3468542 |
| Bff-1-26  | NW_002234966.1 | + | 3484538 | 3484591 |
| Bff-1-27  | NW_002234966.1 | - | 3484261 | 3484208 |
| Bff-1-28  | NW_002234966.1 | - | 3468057 | 3468004 |
| Bff-1-29  | NW_002234990.1 | + | 1184892 | 1184945 |
| Bff-1-30  | NW_002234990.1 | - | 1184339 | 1184286 |
| Bff-1-31  | NW_002234996.1 | - | 803314  | 803261  |
| Bff-1-32  | NW_002235000.1 | - | 2621412 | 2621359 |
| Bff-1-33  | NW_002235005.1 | + | 2065994 | 2066047 |
| Bff-1-34  | NW_002235005.1 | - | 2065518 | 2065465 |
| Bff-1-35  | NW_002235062.1 | - | 345925  | 345872  |
| Bff-1-36  | NW_002235062.1 | - | 139997  | 139944  |
| Bff-1-37  | NW_002235069.1 | - | 814596  | 814543  |
| Bff-1-38  | NW_002235091.1 | + | 538183  | 538236  |
| Bff-1-39  | NW_002235103.1 | + | 1178773 | 1178826 |
| Bff-1-40  | NW_002235103.1 | - | 1178299 | 1178246 |
| Bff-1-41  | NW_002235162.1 | - | 1161142 | 1161089 |
| Bff-1-42  | NW_002235184.1 | + | 317310  | 317363  |
| Bff-1-43  | NW_002235184.1 | - | 316547  | 316494  |
| Bff-1-44  | NW_002235197.1 | + | 585809  | 585862  |

|          |                        |   |           |           |
|----------|------------------------|---|-----------|-----------|
| Bff-1-45 | NW_002235284.1         | - | 820065    | 820012    |
| Bff-1-46 | NW_002235300.1         | + | 231143    | 231196    |
| Bff-1-47 | NW_002235300.1         | + | 625632    | 625685    |
| Bff-1-48 | NW_002235300.1         | - | 625277    | 625224    |
| Bff-1-49 | NW_002235300.1         | - | 230321    | 230268    |
| Bff-1-50 | NW_002235328.1         | + | 629857    | 629910    |
| Bff-1-51 | NW_002235328.1         | - | 628933    | 628880    |
| Bff-1-52 | NW_002235400.1         | - | 436290    | 436237    |
| Bff-1-53 | NW_002235422.1         | + | 320909    | 320962    |
| Bff-1-54 | NW_002235422.1         | - | 320412    | 320359    |
| Bff-1-55 | NW_002235433.1         | - | 231678    | 231625    |
| Bff-1-56 | NW_002235462.1         | + | 488360    | 488413    |
| Bff-1-57 | NW_002235496.1         | + | 939       | 992       |
| Bff-1-58 | NW_002235527.1         | - | 140518    | 140465    |
| Bff-1-59 | NW_002235663.1         | + | 110059    | 110112    |
| Bff-1-60 | NW_002235679.1         | + | 165848    | 165901    |
| Bff-1-61 | NW_002234942.1         | - | 4219484   | 4219431   |
| Bff-1-62 | NW_002234949.1         | - | 2643199   | 2643146   |
| Bff-1-63 | NW_002234950.1         | - | 3195161   | 3195108   |
| Bff-1-64 | NW_002234961.1         | - | 1716607   | 1716554   |
| Bff-1-65 | NW_002235012.1         | + | 2348094   | 2348147   |
| Bff-1-66 | NW_002235037.1         | + | 664114    | 664167    |
| Bff-1-67 | NW_002235047.1         | - | 664946    | 664893    |
| Bff-1-68 | NW_002235183.1         | - | 379197    | 379144    |
| Bff-1-69 | NW_002235299.1         | - | 251543    | 251490    |
| Bff-1-70 | NW_002235377.1         | + | 114629    | 114682    |
| Bff-1-71 | NW_002235417.1         | - | 512307    | 512254    |
| Bff-1-72 | NW_002235584.1         | + | 85278     | 85331     |
| Bff-1-73 | NW_002235822.1         | + | 9795      | 9856      |
| Mdo-1-17 | NW_001581877.1         | - | 1021230   | 1021175   |
| Mdo-1-18 | NC_008802.1            | - | 260720888 | 260720833 |
| env-39   | JCVLSCAF_1096627765100 | - | 718       | 666       |
| env-40   | JCVLSCAF_1096628308131 | + | 1352      | 1457      |
| env-41   | JCVLSCAF_1101667233515 | - | 804       | 738       |
| Aae-1-6  | NW_001810728.1         | + | 662525    | 662577    |
| Aae-1-7  | NW_001809814.1         | + | 208806    | 208858    |
| Aae-1-8  | NW_001810000.1         | - | 1944759   | 1944707   |
| Aae-1-9  | NW_001810715.1         | + | 579652    | 579704    |
| Aae-1-10 | NW_001810715.1         | - | 579402    | 579350    |
| Aae-1-11 | NW_001810872.1         | - | 1727043   | 1726991   |
| Aae-1-12 | NW_001810913.1         | - | 272659    | 272607    |
| Aae-1-13 | NW_001811068.1         | + | 725511    | 725563    |
| Aae-1-14 | NW_001811124.1         | + | 322459    | 322511    |
| Aae-1-15 | NW_001811174.1         | - | 111733    | 111681    |
| Aae-1-16 | NW_001811240.1         | + | 375957    | 376009    |
| Aae-1-17 | NW_001811404.1         | - | 213265    | 213213    |
| Aae-1-18 | NW_001811518.1         | + | 377904    | 377956    |
| Aae-1-19 | NW_001811518.1         | - | 374223    | 374171    |
| Aae-1-20 | NW_001811696.1         | + | 1157007   | 1157059   |
| Aae-1-21 | NW_001810211.1         | + | 283549    | 283601    |
| Aae-1-22 | NW_001810211.1         | - | 283055    | 283003    |
| Aae-1-23 | NW_001811155.1         | + | 1123872   | 1123924   |

|          |                              |   |           |           |
|----------|------------------------------|---|-----------|-----------|
| Aae-1-24 | NW_001811376.1               | - | 98026     | 97974     |
| Aae-1-25 | NW_001811400.1               | + | 506291    | 506343    |
| env-42   | JCVLSCAF_1096626888098       | - | 1301      | 1237      |
| env-43   | JCVLSCAF_1096627423712       | + | 1356      | 1431      |
| env-44   | JCVLSCAF_1096627423712       | + | 995       | 1060      |
| env-45   | NCBI_BBAY_READ_1106627149515 | - | 810       | 761       |
| Pph-1-1  | NC_010325.1                  | + | 2407      | 2488      |
| Pph-2-1  | NC_004466.2                  | - | 44111     | 44036     |
| env-46   | NCBI_READ_1113235566994      | + | 145       | 205       |
| env-47   | NCBI_READ_1113288819750      | + | 180       | 239       |
| env-48   | contig08285                  | + | 1309      | 1371      |
| env-49   | JCVLSCAF_1101668256158       | + | 54        | 113       |
| env-50   | ABDH01049587.1               | + | 351       | 407       |
| Cpa-1-1  | NZ_ACXX01000006.1            | + | 105453    | 105513    |
| Ama-1-1  | NZ_ABYK01000001.1            | - | 262331    | 262260    |
| Ama-1-2  | NZ_ABYK01000023.1            | + | 70304     | 70375     |
| Mdo-1-19 | NW_001581881.1               | - | 9305574   | 9305487   |
| Mdo-1-20 | NC_008802.1                  | - | 501298565 | 501298478 |
| env-51   | ABLW01052804                 | + | 33        | 102       |
| env-52   | soil_Contig11781             | + | 563       | 614       |
| env-53   | hgutS7_s7_171656             | + | 1196      | 1248      |
| env-54   | BAAZ01002540.1               | - | 1661      | 1595      |
| Fpr-1-1  | NZ_DS483500.1                | + | 205812    | 205885    |
| Fpr-1-2  | NZ_ABED02000025.1            | + | 205812    | 205885    |
| env-55   | JCVLSCAF_1096627077510       | - | 1410      | 1348      |
| env-56   | JCVLSCAF_1096627928495       | + | 259       | 320       |
| env-57   | hgutS8_s8_173201             | - | 2943      | 2878      |
| env-58   | hgutS7_s7_177175             | - | 368       | 291       |
| env-59   | hgutS7_s7_171656             | + | 416       | 469       |
| env-60   | hgutS7_s7_171656             | + | 78        | 131       |
| Ptr-1-9  | NW_001228236.1               | + | 3127644   | 3127702   |
| Ptr-1-10 | NC_006486.2                  | + | 52179577  | 52179635  |
| Mmu-1-23 | NT_039240.7                  | + | 19455284  | 19455364  |
| Mmu-1-24 | NW_001030721.1               | + | 5692847   | 5692927   |
| Mmu-1-25 | AC_000025.1                  | + | 70376528  | 70376608  |
| Mmu-1-26 | NC_000069.5                  | + | 70072931  | 70073011  |
| Tca-1-9  | NC_007418.2                  | + | 11907167  | 11907226  |
| Tca-1-10 | NW_001092796.1               | + | 1376853   | 1376912   |
| Rno-1-17 | NW_047625.2                  | - | 34595653  | 34595568  |
| Rno-1-18 | NW_001084804.1               | - | 9312707   | 9312622   |
| Rno-1-19 | AC_000070.1                  | - | 137553720 | 137553635 |
| Rno-1-20 | NC_005101.2                  | - | 148238483 | 148238398 |
| Aae-1-26 | NW_001810813.1               | + | 97811     | 97864     |
| Aae-1-27 | NW_001811223.1               | - | 83616     | 83563     |
| Ppl-1-1  | NW_002988900.1               | + | 28360     | 28432     |
| Ppl-1-2  | NW_002989076.1               | - | 64620     | 64548     |
| Ppl-1-3  | NW_002989222.1               | + | 2801      | 2873      |
| Ppl-1-4  | NW_002989069.1               | + | 62864     | 62936     |
| Ppl-1-5  | NW_002989957.1               | + | 255       | 327       |
| Ppl-1-6  | NW_002989048.1               | - | 156246    | 156174    |
| Ppl-1-7  | NW_002988888.1               | - | 613649    | 613577    |
| Ppl-1-8  | NW_002988940.1               | + | 38876     | 38948     |

|          |                   |   |          |          |
|----------|-------------------|---|----------|----------|
| Ppl-1-9  | NW_002989037.1    | - | 165379   | 165307   |
| Ppl-1-10 | NW_002989042.1    | + | 824      | 896      |
| Ppl-1-11 | NW_002989096.1    | - | 126312   | 126240   |
| Ppl-1-12 | NW_002989855.1    | + | 453      | 525      |
| Ppl-1-13 | NW_002988904.1    | - | 507416   | 507344   |
| Ppl-1-14 | NW_002988919.1    | + | 1663     | 1735     |
| Ppl-1-15 | NW_002988940.1    | + | 43410    | 43482    |
| Ppl-1-16 | NW_002989037.1    | - | 164859   | 164787   |
| Ppl-1-17 | NW_002989058.1    | - | 167420   | 167348   |
| Ppl-1-18 | NW_002989099.1    | + | 4664     | 4736     |
| Ppl-1-19 | NW_002989702.1    | - | 8052     | 7980     |
| Ppl-1-20 | NW_002989814.1    | - | 1376     | 1304     |
| Ppl-1-21 | NW_002988969.1    | + | 376      | 448      |
| Ppl-1-22 | NW_002988987.1    | - | 243392   | 243320   |
| Ppl-1-23 | NW_002989096.1    | - | 131588   | 131516   |
| Ppl-1-24 | NW_002989165.1    | + | 620      | 692      |
| Ppl-1-25 | NW_002989165.1    | + | 29269    | 29341    |
| Ppl-1-26 | NW_002988984.1    | - | 271146   | 271074   |
| Ppl-1-27 | NW_002989069.1    | + | 57645    | 57718    |
| Ppl-1-28 | NW_002988903.1    | + | 284952   | 285024   |
| Ppl-1-29 | NW_002988958.1    | + | 24741    | 24813    |
| Ppl-1-30 | NW_002988969.1    | + | 65033    | 65105    |
| Ppl-1-31 | NW_002988992.1    | - | 168213   | 168141   |
| Ppl-1-32 | NW_002989102.1    | + | 837      | 909      |
| Ppl-1-33 | NW_002989222.1    | + | 992      | 1064     |
| Ppl-1-34 | NW_002989793.1    | - | 1003     | 931      |
| Ppl-1-35 | NW_002990076.1    | - | 452      | 380      |
| Ppl-1-36 | NW_002988952.1    | + | 15596    | 15669    |
| Ppl-1-37 | NW_002988958.1    | + | 25125    | 25198    |
| Ppl-1-38 | NW_002988969.1    | + | 65417    | 65490    |
| Ppl-1-39 | NW_002989069.1    | + | 63134    | 63207    |
| Yli-1-3  | NC_006069.1       | - | 1037930  | 1037865  |
| Tca-1-11 | NC_007418.2       | + | 16305889 | 16305936 |
| Tca-1-12 | NW_001092797.1    | + | 1703393  | 1703440  |
| Tca-1-13 | NW_001094240.1    | - | 115531   | 115486   |
| Mmu-3-1  | NT_166221.1       | - | 455569   | 455518   |
| Dre-1-3  | NC_009253.1       | + | 954995   | 955057   |
| Dac-1-1  | NZ_ABTQ01000041.1 | - | 18223    | 18159    |
| Dac-1-2  | NZ_ABTQ01000041.1 | - | 17708    | 17644    |
| Bfl-1-74 | NW_002235408.1    | + | 168220   | 168268   |
| Bfl-1-75 | NW_002234948.1    | - | 1888622  | 1888574  |
| Bfl-1-76 | NW_002235240.1    | - | 268407   | 268359   |
| Bfl-1-77 | NW_002235274.1    | - | 303106   | 303058   |
| Bfl-1-78 | NW_002234954.1    | + | 1024383  | 1024431  |
| Bfl-1-79 | NW_002234954.1    | - | 1023447  | 1023399  |
| Bfl-1-80 | NW_002234957.1    | + | 1549765  | 1549813  |
| Bfl-1-81 | NW_002234957.1    | - | 1548184  | 1548136  |
| Bfl-1-82 | NW_002234966.1    | - | 2948031  | 2947983  |
| Bfl-1-83 | NW_002234969.1    | + | 3372714  | 3372762  |
| Bfl-1-84 | NW_002234974.1    | - | 142437   | 142389   |
| Bfl-1-85 | NW_002234976.1    | + | 2767385  | 2767433  |
| Bfl-1-86 | NW_002234976.1    | - | 2765312  | 2765264  |

|           |                |   |         |         |
|-----------|----------------|---|---------|---------|
| Bff-1-87  | NW_002234978.1 | + | 2346925 | 2346973 |
| Bff-1-88  | NW_002234978.1 | - | 2346131 | 2346083 |
| Bff-1-89  | NW_002234988.1 | - | 1686332 | 1686284 |
| Bff-1-90  | NW_002234993.1 | + | 356498  | 356546  |
| Bff-1-91  | NW_002234998.1 | + | 1990291 | 1990339 |
| Bff-1-92  | NW_002234998.1 | - | 47961   | 47913   |
| Bff-1-93  | NW_002235016.1 | + | 1809580 | 1809628 |
| Bff-1-94  | NW_002235016.1 | - | 1809273 | 1809225 |
| Bff-1-95  | NW_002235027.1 | + | 164410  | 164458  |
| Bff-1-96  | NW_002235027.1 | + | 244546  | 244594  |
| Bff-1-97  | NW_002235027.1 | - | 243862  | 243814  |
| Bff-1-98  | NW_002235028.1 | + | 295808  | 295856  |
| Bff-1-99  | NW_002235028.1 | - | 295346  | 295298  |
| Bff-1-100 | NW_002235029.1 | + | 2177153 | 2177201 |
| Bff-1-101 | NW_002235034.1 | + | 1059420 | 1059468 |
| Bff-1-102 | NW_002235034.1 | - | 1059196 | 1059148 |
| Bff-1-103 | NW_002235040.1 | + | 199392  | 199440  |
| Bff-1-104 | NW_002235040.1 | - | 199180  | 199132  |
| Bff-1-105 | NW_002235047.1 | - | 818829  | 818781  |
| Bff-1-106 | NW_002235050.1 | + | 656291  | 656339  |
| Bff-1-107 | NW_002235084.1 | - | 1507468 | 1507420 |
| Bff-1-108 | NW_002235104.1 | - | 436665  | 436617  |
| Bff-1-109 | NW_002235115.1 | + | 759795  | 759843  |
| Bff-1-110 | NW_002235115.1 | + | 831181  | 831229  |
| Bff-1-111 | NW_002235115.1 | - | 829585  | 829537  |
| Bff-1-112 | NW_002235115.1 | - | 757428  | 757380  |
| Bff-1-113 | NW_002235163.1 | + | 634872  | 634920  |
| Bff-1-114 | NW_002235170.1 | + | 1245885 | 1245933 |
| Bff-1-115 | NW_002235170.1 | - | 1232876 | 1232828 |
| Bff-1-116 | NW_002235174.1 | + | 902572  | 902620  |
| Bff-1-117 | NW_002235192.1 | + | 916638  | 916686  |
| Bff-1-118 | NW_002235198.1 | - | 101596  | 101548  |
| Bff-1-119 | NW_002235224.1 | - | 704438  | 704390  |
| Bff-1-120 | NW_002235245.1 | + | 504776  | 504824  |
| Bff-1-121 | NW_002235245.1 | - | 504592  | 504544  |
| Bff-1-122 | NW_002235304.1 | + | 76957   | 77005   |
| Bff-1-123 | NW_002235315.1 | - | 612534  | 612486  |
| Bff-1-124 | NW_002235320.1 | + | 364117  | 364165  |
| Bff-1-125 | NW_002235351.1 | - | 194204  | 194156  |
| Bff-1-126 | NW_002235384.1 | + | 301388  | 301436  |
| Bff-1-127 | NW_002235384.1 | - | 299914  | 299866  |
| Bff-1-128 | NW_002235444.1 | + | 53319   | 53367   |
| Bff-1-129 | NW_002235515.1 | + | 330775  | 330823  |
| Bff-1-130 | NW_002235515.1 | - | 330078  | 330030  |
| Bff-1-131 | NW_002235560.1 | + | 180197  | 180245  |
| Bff-1-132 | NW_002235560.1 | - | 179651  | 179603  |
| Bff-1-133 | NW_002235593.1 | + | 286916  | 286964  |
| Bff-1-134 | NW_002235593.1 | - | 286434  | 286386  |
| Bff-1-135 | NW_002235696.1 | + | 166394  | 166442  |
| Bff-1-136 | NW_002235732.1 | - | 59193   | 59145   |
| Bff-1-137 | NW_002234961.1 | - | 2131799 | 2131751 |
| Bff-1-138 | NW_002235442.1 | + | 483375  | 483423  |

|           |                        |   |         |         |
|-----------|------------------------|---|---------|---------|
| Bff-1-139 | NW_002235224.1         | + | 704653  | 704697  |
| Bff-1-140 | NW_002235408.1         | - | 546165  | 546109  |
| Bff-1-141 | NW_002235653.1         | - | 74749   | 74701   |
| env-61    | JCVLSCAF_1096628253058 | + | 1366    | 1415    |
| Nve-1-135 | NW_001834409.1         | - | 2509834 | 2509770 |
| Nve-1-136 | NW_001834376.1         | - | 703060  | 702996  |
| Nve-1-137 | NW_001834383.1         | + | 1007324 | 1007388 |
| Nve-1-138 | NW_001833108.1         | - | 16848   | 16784   |
| Nve-1-139 | NW_001833119.1         | + | 28457   | 28521   |
| Nve-1-140 | NW_001833346.1         | - | 25996   | 25932   |
| Nve-1-141 | NW_001833742.1         | - | 20336   | 20272   |
| Nve-1-142 | NW_001833803.1         | - | 55969   | 55905   |
| Nve-1-143 | NW_001834001.1         | - | 48098   | 48034   |
| Nve-1-144 | NW_001834079.1         | - | 88132   | 88068   |
| Nve-1-145 | NW_001834162.1         | - | 264631  | 264567  |
| Nve-1-146 | NW_001834245.1         | - | 494410  | 494346  |
| Nve-1-147 | NW_001834327.1         | - | 503642  | 503578  |
| Nve-1-148 | NW_001834328.1         | + | 787322  | 787386  |
| Nve-1-149 | NW_001834383.1         | + | 1014169 | 1014233 |
| Nve-1-150 | NW_001833972.1         | - | 28515   | 28451   |
| Nve-1-151 | NW_001834300.1         | - | 268327  | 268263  |
| Nve-1-152 | NW_001834315.1         | + | 63215   | 63279   |
| Isc-1-2   | NW_002642081.1         | + | 13087   | 13133   |
| Isc-1-3   | NW_002769786.1         | + | 947     | 993     |
| Isc-1-4   | NW_002742091.1         | + | 480     | 526     |
| Isc-1-5   | NW_002679431.1         | + | 1134    | 1180    |
| Isc-1-6   | NW_002749100.1         | + | 1       | 47      |
| Isc-1-7   | NW_002680771.1         | - | 486     | 440     |
| Isc-1-8   | NW_002677169.1         | - | 293405  | 293359  |
| Isc-1-9   | NW_002517528.1         | - | 419     | 373     |
| Isc-1-10  | NW_002815200.1         | - | 769493  | 769447  |
| Isc-1-11  | NW_002828199.1         | - | 183653  | 183607  |
| Isc-1-12  | NW_002727546.1         | - | 862     | 816     |
| Isc-1-13  | NW_002862507.1         | - | 31622   | 31576   |
| Isc-1-14  | NW_002603068.1         | - | 19003   | 18957   |
| Isc-1-15  | NW_002605043.1         | + | 257     | 303     |
| Isc-1-16  | NW_002776155.1         | - | 53214   | 53168   |
| Isc-1-17  | NW_002676341.1         | - | 22256   | 22210   |
| Isc-1-18  | NW_002567796.1         | + | 383627  | 383673  |
| Isc-1-19  | NW_002562747.1         | - | 304     | 258     |
| Isc-1-20  | NW_002600415.1         | - | 910     | 864     |
| Isc-1-21  | NW_002855198.1         | - | 568     | 522     |
| Isc-1-22  | NW_002587241.1         | + | 184471  | 184517  |
| Isc-1-23  | NW_002560514.1         | - | 174     | 128     |
| Isc-1-24  | NW_002788893.1         | - | 181979  | 181933  |
| Isc-1-25  | NW_002663741.1         | - | 144     | 98      |
| Isc-1-26  | NW_002648027.1         | + | 485     | 531     |
| Isc-1-27  | NW_002796001.1         | - | 16434   | 16388   |
| Isc-1-28  | NW_002586008.1         | + | 247272  | 247318  |
| Isc-1-29  | NW_002524507.1         | - | 413797  | 413751  |
| Isc-1-30  | NW_002597356.1         | + | 309271  | 309317  |
| Isc-1-31  | NW_002866415.1         | - | 506     | 460     |

|          |                |   |         |         |
|----------|----------------|---|---------|---------|
| Isc-1-32 | NW_002591206.1 | + | 25823   | 25869   |
| Isc-1-33 | NW_002597032.1 | + | 7422    | 7468    |
| Isc-1-34 | NW_002573293.1 | - | 490     | 444     |
| Isc-1-35 | NW_002634276.1 | + | 384     | 430     |
| Isc-1-36 | NW_002606474.1 | - | 21063   | 21017   |
| Isc-1-37 | NW_002708378.1 | + | 369     | 415     |
| Isc-1-38 | NW_002731203.1 | + | 41510   | 41556   |
| Isc-1-39 | NW_002697200.1 | + | 6997    | 7043    |
| Isc-1-40 | NW_002771710.1 | - | 693     | 647     |
| Isc-1-41 | NW_002810481.1 | + | 12784   | 12830   |
| Isc-1-42 | NW_002834404.1 | - | 163     | 117     |
| Isc-1-43 | NW_002840718.1 | + | 3168    | 3214    |
| Isc-1-44 | NW_002747002.1 | + | 353804  | 353850  |
| Isc-1-45 | NW_002820801.1 | + | 4665    | 4711    |
| Isc-1-46 | NW_002663060.1 | + | 238238  | 238284  |
| Isc-1-47 | NW_002603288.1 | + | 662683  | 662729  |
| Isc-1-48 | NW_002510003.1 | - | 129074  | 129028  |
| Isc-1-49 | NW_002583161.1 | + | 130350  | 130396  |
| Isc-1-50 | NW_002829613.1 | - | 1374    | 1328    |
| Isc-1-51 | NW_002822383.1 | - | 1202780 | 1202734 |
| Isc-1-52 | NW_002819664.1 | + | 951     | 997     |
| Isc-1-53 | NW_002598356.1 | + | 2483467 | 2483515 |
| Aae-1-28 | NW_001811605.1 | - | 24508   | 24462   |
| Aae-1-29 | NW_001811540.1 | - | 2404487 | 2404440 |
| Aae-1-30 | NW_001811351.1 | + | 362694  | 362741  |
| Aae-1-31 | NW_001810944.1 | + | 1166724 | 1166771 |
| Aae-1-32 | NW_001809911.1 | + | 233667  | 233714  |
| Aae-1-33 | NW_001810286.1 | - | 1702965 | 1702918 |
| Aae-1-34 | NW_001810318.1 | - | 939768  | 939721  |
| Aae-1-35 | NW_001810381.1 | + | 1574666 | 1574713 |
| Aae-1-36 | NW_001810599.1 | + | 1329326 | 1329373 |
| Aae-1-37 | NW_001810996.1 | - | 2113297 | 2113250 |
| Aae-1-38 | NW_001811551.1 | - | 123113  | 123066  |
| Aae-1-39 | NW_001809890.1 | + | 1737462 | 1737509 |
| Aae-1-40 | NW_001809890.1 | - | 1728926 | 1728879 |
| Aae-1-41 | NW_001810555.1 | + | 3795958 | 3796005 |
| Aae-1-42 | NW_001810555.1 | - | 3794126 | 3794079 |
| Aae-1-43 | NW_001810927.1 | - | 1016579 | 1016532 |
| Aae-1-44 | NW_001811007.1 | + | 1652020 | 1652067 |
| Aae-1-45 | NW_001811007.1 | - | 1643861 | 1643814 |
| Aae-1-46 | NW_001811051.1 | + | 545252  | 545299  |
| Aae-1-47 | NW_001811052.1 | - | 3007485 | 3007438 |
| Aae-1-48 | NW_001811454.1 | + | 54240   | 54287   |
| Aae-1-49 | NW_001811469.1 | + | 407372  | 407419  |
| Aae-1-50 | NW_001811529.1 | + | 995009  | 995056  |
| Aae-1-51 | NW_001811529.1 | - | 992088  | 992041  |
| Aae-1-52 | NW_001811529.1 | - | 988405  | 988358  |
| Aae-1-53 | NW_001811573.1 | + | 868494  | 868541  |
| Aae-1-54 | NW_001837414.1 | - | 24147   | 24100   |
| Aae-1-55 | NW_001810006.1 | + | 40367   | 40414   |
| Aae-1-56 | NW_001810728.1 | + | 161671  | 161718  |
| Aae-1-57 | NW_001810736.1 | + | 288960  | 289007  |



|           |                        |   |          |          |
|-----------|------------------------|---|----------|----------|
| Aae-1-58  | NW_001810744.1         | + | 1104698  | 1104745  |
| Aae-1-59  | NW_001810975.1         | - | 1522667  | 1522620  |
| Aae-1-60  | NW_001811051.1         | + | 790413   | 790460   |
| Aae-1-61  | NW_001811051.1         | - | 790016   | 789969   |
| Aae-1-62  | NW_001811422.1         | - | 383796   | 383749   |
| Aae-1-63  | NW_001811758.1         | - | 40175    | 40128    |
| Aae-1-64  | NW_001809890.1         | + | 715583   | 715630   |
| Aae-1-65  | NW_001811005.1         | + | 1486752  | 1486799  |
| Aae-1-66  | NW_001811012.1         | + | 1205652  | 1205699  |
| Aae-1-67  | NW_001811071.1         | + | 1175469  | 1175516  |
| Aae-1-68  | NW_001810371.1         | + | 187557   | 187605   |
| Nve-1-153 | NW_001834024.1         | - | 164335   | 164290   |
| Nve-1-154 | NW_001834114.1         | - | 7248     | 7203     |
| Nve-1-155 | NW_001833989.1         | - | 17869    | 17824    |
| Nve-1-156 | NW_001834135.1         | - | 289226   | 289181   |
| Nve-1-157 | NW_001834185.1         | + | 192241   | 192286   |
| Nve-1-158 | NW_001834225.1         | + | 168276   | 168321   |
| Nve-1-159 | NW_001834258.1         | - | 529512   | 529467   |
| Nve-1-160 | NW_001834277.1         | - | 444139   | 444094   |
| Nve-1-161 | NW_001834317.1         | - | 201595   | 201550   |
| Nve-1-162 | NW_001834338.1         | + | 365716   | 365761   |
| Nve-1-163 | NW_001834347.1         | - | 247931   | 247886   |
| Nve-1-164 | NW_001834350.1         | - | 989414   | 989369   |
| Nve-1-165 | NW_001834395.1         | + | 496948   | 496993   |
| Nve-1-166 | NW_001834401.1         | + | 1453253  | 1453298  |
| Nve-1-167 | NW_001834410.1         | - | 1845603  | 1845558  |
| Nve-1-168 | NW_001834309.1         | - | 483169   | 483122   |
| Nve-1-169 | NW_001834242.1         | - | 264570   | 264525   |
| Nve-1-170 | NW_001834256.1         | - | 416542   | 416496   |
| Nve-1-171 | NW_001834220.1         | - | 281922   | 281854   |
| env-62    | JCVLSCAF_1101668298282 | + | 1243     | 1289     |
| env-63    | JCVLSCAF_1096626313467 | + | 655      | 722      |
| Yli-1-4   | NC_006067.1            | + | 1267927  | 1268004  |
| env-64    | JCVLSCAF_1101668082200 | + | 564      | 616      |
| env-65    | JCVLSCAF_1101668159470 | + | 694      | 761      |
| Bta-1-1   | NW_001494423.2         | + | 527136   | 527199   |
| Bta-1-2   | NC_007328.3            | + | 35909687 | 35909750 |
| Hma-1-2   | NW_002077193.1         | + | 18279    | 18327    |
| Hma-1-3   | NW_002124763.1         | + | 4057     | 4105     |
| Hma-1-4   | NW_002106000.1         | + | 3510     | 3558     |
| Hma-1-5   | NW_002119109.1         | - | 833      | 785      |
| Hma-1-6   | NW_002164288.1         | - | 26210    | 26162    |
| Yli-1-5   | NC_006072.1            | + | 1873871  | 1873945  |
| Yli-1-6   | NC_006070.1            | + | 1831988  | 1832062  |
| Yli-1-7   | NC_006067.1            | - | 926838   | 926764   |
| Yli-1-8   | NC_006069.1            | + | 2240506  | 2240580  |
| Yli-1-9   | NC_006069.1            | + | 2071693  | 2071767  |
| Yli-1-10  | NC_006070.1            | + | 1990474  | 1990548  |
| Yli-1-11  | NC_006072.1            | - | 2111653  | 2111579  |
| Yli-1-12  | NC_006072.1            | - | 2055084  | 2055010  |
| Yli-1-13  | NC_006068.1            | + | 1042478  | 1042537  |
| Sma-1-1   | NW_003038086.1         | + | 176951   | 177000   |

|          |                        |   |           |           |
|----------|------------------------|---|-----------|-----------|
| Sma-1-2  | NS.000200.1            | + | 272425544 | 272425593 |
| env-66   | ABMF01074935           | - | 79        | 11        |
| Nfi-1-1  | NW_001509761.1         | - | 12507     | 12424     |
| Isc-1-54 | NW_002721811.1         | + | 872       | 921       |
| Isc-1-55 | NW_002712427.1         | + | 309       | 358       |
| env-67   | ABLX01151415           | + | 14        | 63        |
| Sma-1-3  | NW_003038014.1         | - | 338331    | 338254    |
| Sma-1-4  | NS.000200.1            | - | 230079020 | 230078943 |
| env-68   | JCVLSCAF_1096627819017 | + | 74        | 130       |
| Mdo-1-21 | NW_001581961.1         | - | 43237448  | 43237381  |
| Mdo-1-22 | NC_008804.1            | - | 154633726 | 154633659 |
| Ldr-1-1  | NZ_GG697213.1          | + | 55707     | 55766     |
| Ldr-1-2  | NZ_ACUL01000193.1      | + | 55707     | 55766     |
| Lpn-4-1  | NC_002942.5            | - | 1072076   | 1072023   |
| Lpn-1-1  | NC_009494.1            | + | 2514633   | 2514686   |
| Lpn-2-1  | NC_006369.1            | - | 1144756   | 1144703   |
| Lpn-3-1  | NC_006368.1            | - | 1171359   | 1171306   |
| Ldr-1-3  | NZ_GG697172.2          | - | 4062      | 4009      |
| Ldr-1-4  | NZ_ACUL01000006.1      | - | 4062      | 4009      |
| Ldr-1-5  | NZ_GG697225.1          | - | 31469     | 31411     |
| Ldr-1-6  | NZ_ACUL01000246.1      | - | 27663     | 27605     |
| Ldr-1-7  | NZ_GG697220.1          | - | 5568      | 5510      |
| Ldr-1-8  | NZ_ACUL01000219.1      | - | 3940      | 3882      |
| Ldr-1-9  | NZ_GG697210.1          | - | 187605    | 187554    |
| Ldr-1-10 | NZ_ACUL01000186.1      | - | 3471      | 3420      |
| Lpn-3-2  | NC_006368.1            | + | 2751461   | 2751515   |
| Lpn-1-2  | NC_009494.1            | + | 2095542   | 2095591   |
| Ldr-1-11 | NZ_GG697186.1          | + | 2211      | 2267      |
| Ldr-1-12 | NZ_ACUL01000097.1      | + | 2211      | 2267      |
| Ldr-1-13 | NZ_GG697205.1          | + | 194967    | 195020    |
| Ldr-1-14 | NZ_ACUL01000161.1      | + | 57418     | 57471     |
| Lpn-2-2  | NC_006369.1            | + | 2846397   | 2846450   |
| Ldr-1-15 | NZ_GG697176.2          | - | 2120      | 2064      |
| Ldr-1-16 | NZ_ACUL01000029.1      | - | 2120      | 2064      |
| Lpn-1-3  | NC_009494.1            | + | 2093328   | 2093384   |
| Lpn-1-4  | NC_009494.1            | + | 1515733   | 1515786   |
| Lpn-3-3  | NC_006368.1            | + | 2159430   | 2159483   |
| Lpn-2-3  | NC_006369.1            | - | 1207047   | 1206994   |
| Lpn-3-4  | NC_006368.1            | - | 1174061   | 1174006   |
| Ldr-1-17 | NZ_GG697215.1          | - | 2091      | 2034      |
| Ldr-1-18 | NZ_ACUL01000196.1      | - | 2091      | 2034      |
| Lpn-4-2  | NC_002942.5            | - | 1074855   | 1074800   |
| Lpn-1-5  | NC_009494.1            | + | 2511858   | 2511913   |
| env-69   | JCVLSCAF_1096626609377 | - | 526       | 458       |
| Sma-1-5  | NW_003026465.1         | + | 429593    | 429666    |
| Sma-1-6  | NS.000200.1            | + | 207822187 | 207822260 |
| Sma-1-7  | NW_003038222.1         | - | 32110     | 32059     |
| Sma-1-8  | NS.000200.1            | - | 308819774 | 308819723 |
| Sma-1-9  | NW_003038118.1         | + | 181300    | 181364    |
| Sma-1-10 | NS.000200.1            | + | 277745427 | 277745491 |
| env-70   | NCBLREAD_1112079264739 | - | 309       | 249       |
| env-71   | JCVLSCAF_1101668371663 | - | 785       | 728       |

|          |                              |   |           |           |
|----------|------------------------------|---|-----------|-----------|
| Sma-1-11 | NW_003038135.1               | - | 52950     | 52877     |
| Sma-1-12 | NS_000200.1                  | - | 283925289 | 283925216 |
| env-72   | NCBI_BBAY_READ_1105897217131 | - | 305       | 190       |
| Hma-1-7  | NW_002160824.1               | + | 129091    | 129144    |
| Hma-1-8  | NW_002161880.1               | + | 6807      | 6860      |
| Csy-1-1  | NS_000189.1                  | + | 691487    | 691550    |
| Eca-1-13 | NW_001867423.1               | + | 9494273   | 9494321   |
| Eca-1-14 | NC_009149.2                  | + | 36560903  | 36560951  |
| env-73   | 84502383                     | - | 747       | 688       |
| env-74   | ABMB01022426                 | - | 98        | 40        |
| env-75   | NCBI_READ_1112309042424      | + | 132       | 185       |
| env-76   | JCVLSCAF_1101668035444       | + | 832       | 912       |
| Sma-1-13 | NW_003038022.1               | + | 622166    | 622226    |
| Sma-1-14 | NS_000200.1                  | + | 236303008 | 236303068 |
| Sma-1-15 | NW_003037859.1               | + | 375455    | 375523    |
| Sma-1-16 | NS_000200.1                  | + | 103054296 | 103054364 |
| Aae-1-69 | NW_001811129.1               | + | 4713376   | 4713459   |
| Cqu-1-1  | NW_001886869.1               | - | 185843    | 185775    |
| Aae-1-70 | NW_001811462.1               | - | 386848    | 386795    |
| Aae-1-71 | NW_001811485.1               | - | 2881342   | 2881283   |
| Aae-1-72 | NW_001811042.1               | + | 718517    | 718574    |
| Aae-1-73 | NW_001811498.1               | + | 206290    | 206342    |
| Aae-1-74 | NW_001811375.1               | + | 398697    | 398750    |
| Aae-1-75 | NW_001810156.1               | + | 1172558   | 1172612   |
| Aae-1-76 | NW_001809814.1               | + | 1082261   | 1082316   |
| Aae-1-77 | NW_001810974.1               | + | 176898    | 176951    |
| Aae-1-78 | NW_001810721.1               | + | 1251064   | 1251118   |
| Aae-1-79 | NW_001810307.1               | + | 183910    | 183965    |
| Cqu-1-2  | NW_001887254.1               | + | 133905    | 133957    |
| Cqu-1-3  | NW_001887222.1               | + | 277298    | 277350    |
| Cqu-1-4  | NW_001887310.1               | + | 35764     | 35816     |
| Cqu-1-5  | NW_001887310.1               | - | 5954      | 5902      |
| Cqu-1-6  | NW_001887352.1               | + | 121459    | 121511    |
| Cqu-1-7  | NW_001887553.1               | + | 178650    | 178702    |
| Cqu-1-8  | NW_001886739.1               | - | 933411    | 933359    |
| Cqu-1-9  | NW_001887091.1               | + | 202943    | 202995    |
| Cqu-1-10 | NW_001886715.1               | + | 1033335   | 1033387   |
| Cqu-1-11 | NW_001887996.1               | + | 33640     | 33692     |
| Cqu-1-12 | NW_001886868.1               | - | 37581     | 37529     |
| Cqu-1-13 | NW_001887301.1               | - | 26128     | 26076     |
| Cqu-1-14 | NW_001887547.1               | + | 74642     | 74694     |
| Cqu-1-15 | NW_001886914.1               | - | 587470    | 587418    |
| Cqu-1-16 | NW_001887097.1               | + | 231334    | 231386    |
| Cqu-1-17 | NW_001886773.1               | - | 954557    | 954505    |
| Cqu-1-18 | NW_001886707.1               | - | 1801093   | 1801041   |
| Aae-1-80 | NW_001837444.1               | + | 34233     | 34287     |
| Aae-1-81 | NW_001811618.1               | + | 1112562   | 1112618   |
| Aae-1-82 | NW_001811200.1               | - | 395926    | 395872    |
| Aae-1-83 | NW_001810783.1               | + | 2046658   | 2046712   |
| Aae-1-84 | NW_001810011.1               | - | 1600806   | 1600751   |
| Aae-1-85 | NW_001810381.1               | - | 1515683   | 1515628   |
| Aae-1-86 | NW_001811462.1               | + | 277499    | 277552    |

|           |                |   |         |         |
|-----------|----------------|---|---------|---------|
| Aae-1-87  | NW_001810575.1 | - | 1803735 | 1803683 |
| Aae-1-88  | NW_001811338.1 | - | 603919  | 603867  |
| Aae-1-89  | NW_001810844.1 | - | 1866218 | 1866166 |
| Aae-1-90  | NW_001811440.1 | + | 1129509 | 1129564 |
| Aae-1-91  | NW_001811494.1 | - | 357556  | 357502  |
| Aae-1-92  | NW_001811236.1 | + | 717688  | 717742  |
| Aae-1-93  | NW_001835485.1 | + | 5572    | 5626    |
| Aae-1-94  | NW_001811601.1 | + | 149125  | 149180  |
| Aae-1-95  | NW_001810750.1 | - | 1254768 | 1254709 |
| Aae-1-96  | NW_001809912.1 | - | 2022835 | 2022780 |
| Aae-1-97  | NW_001811329.1 | + | 1180491 | 1180549 |
| Aae-1-98  | NW_001811175.1 | - | 818395  | 818340  |
| Aae-1-99  | NW_001810156.1 | - | 155137  | 155085  |
| Aae-1-100 | NW_001811252.1 | + | 221529  | 221586  |
| Aae-1-101 | NW_001811007.1 | - | 1792937 | 1792878 |
| Aae-1-102 | NW_001811418.1 | + | 463492  | 463545  |
| Aae-1-103 | NW_001811772.1 | - | 2616497 | 2616443 |
| Aae-1-104 | NW_001810555.1 | - | 3146602 | 3146548 |
| Aae-1-105 | NW_001810392.1 | - | 891853  | 891801  |
| Aae-1-106 | NW_001811399.1 | - | 332791  | 332736  |
| Aae-1-107 | NW_001811005.1 | + | 1140215 | 1140268 |
| Aae-1-108 | NW_001810264.1 | + | 935504  | 935558  |
| Aae-1-109 | NW_001810681.1 | - | 1146275 | 1146216 |
| Aae-1-110 | NW_001811477.1 | - | 375152  | 375098  |
| Aae-1-111 | NW_001811772.1 | + | 2708171 | 2708225 |
| Aae-1-112 | NW_001810696.1 | - | 657068  | 657014  |
| Aae-1-113 | NW_001810623.1 | - | 77173   | 77119   |
| Aae-1-114 | NW_001811289.1 | - | 623431  | 623375  |
| Aae-1-115 | NW_001810901.1 | - | 1525595 | 1525540 |
| Aae-1-116 | NW_001811760.1 | + | 238373  | 238428  |
| Aae-1-117 | NW_001810592.1 | + | 1035417 | 1035472 |
| Aae-1-118 | NW_001811141.1 | + | 989017  | 989076  |
| Aae-1-119 | NW_001811362.1 | - | 24248   | 24193   |
| Aae-1-120 | NW_001811507.1 | - | 1051262 | 1051206 |
| Aae-1-121 | NW_001811522.1 | + | 456913  | 456971  |
| Aae-1-122 | NW_001811440.1 | + | 875418  | 875476  |
| Aae-1-123 | NW_001811085.1 | - | 2729178 | 2729127 |
| Aae-1-124 | NW_001811085.1 | - | 2724313 | 2724262 |
| Aae-1-125 | NW_001811462.1 | + | 4352948 | 4353003 |
| Aae-1-126 | NW_001811530.1 | + | 299548  | 299603  |
| Aae-1-127 | NW_001811059.1 | - | 233509  | 233456  |
| Aae-1-128 | NW_001811184.1 | + | 292994  | 293047  |
| Aae-1-129 | NW_001810714.1 | + | 3193937 | 3193990 |
| Aae-1-130 | NW_001811308.1 | - | 746786  | 746733  |
| Aae-1-131 | NW_001811523.1 | - | 460831  | 460776  |
| Aae-1-132 | NW_001810436.1 | + | 855780  | 855835  |
| Aae-1-133 | NW_001811748.1 | - | 316029  | 315974  |
| Aae-1-134 | NW_001810371.1 | + | 212466  | 212521  |
| Aae-1-135 | NW_001810328.1 | - | 1807523 | 1807468 |
| Aae-1-136 | NW_001811190.1 | - | 535249  | 535194  |
| Aae-1-137 | NW_001811194.1 | + | 598498  | 598553  |
| Aae-1-138 | NW_001811209.1 | + | 838147  | 838202  |

|           |                |   |         |         |
|-----------|----------------|---|---------|---------|
| Aae-1-139 | NW_001809979.1 | - | 2000699 | 2000644 |
| Aae-1-140 | NW_001810979.1 | - | 254586  | 254531  |
| Aae-1-141 | NW_001810988.1 | - | 771056  | 771001  |
| Aae-1-142 | NW_001811396.1 | - | 298932  | 298877  |
| Aae-1-143 | NW_001810791.1 | - | 765268  | 765213  |
| Aae-1-144 | NW_001811318.1 | + | 2757923 | 2757978 |
| Aae-1-145 | NW_001810715.1 | + | 304193  | 304248  |
| Aae-1-146 | NW_001811372.1 | - | 84199   | 84144   |
| Aae-1-147 | NW_001811340.1 | + | 2249625 | 2249680 |
| Aae-1-148 | NW_001811065.1 | - | 229088  | 229033  |
| Aae-1-149 | NW_001811467.1 | - | 276135  | 276080  |
| Aae-1-150 | NW_001809979.1 | - | 581355  | 581306  |
| Aae-1-151 | NW_001809982.1 | - | 129313  | 129257  |
| Aae-1-152 | NW_001809895.1 | + | 153761  | 153817  |
| Aae-1-153 | NW_001811158.1 | - | 784838  | 784782  |
| Aae-1-154 | NW_001811530.1 | - | 353688  | 353639  |
| Aae-1-155 | NW_001810813.1 | + | 1191633 | 1191688 |
| Aae-1-156 | NW_001810425.1 | - | 1911416 | 1911365 |
| Aae-1-157 | NW_001810938.1 | - | 149933  | 149881  |
| Aae-1-158 | NW_001811003.1 | + | 270588  | 270641  |
| Aae-1-159 | NW_001811060.1 | - | 474291  | 474238  |
| Aae-1-160 | NW_001811553.1 | - | 65850   | 65797   |
| Aae-1-161 | NW_001810339.1 | - | 956874  | 956819  |
| Aae-1-162 | NW_001810067.1 | - | 989870  | 989815  |
| Aae-1-163 | NW_001809951.1 | + | 61740   | 61793   |
| Aae-1-164 | NW_001809847.1 | - | 1599254 | 1599201 |
| Aae-1-165 | NW_001811069.1 | - | 1077057 | 1076996 |
| Aae-1-166 | NW_001811109.1 | - | 777969  | 777918  |
| Aae-1-167 | NW_001811451.1 | - | 2628028 | 2627973 |
| Aae-1-168 | NW_001810681.1 | + | 113736  | 113791  |
| Aae-1-169 | NW_001811429.1 | + | 1406106 | 1406161 |
| Aae-1-170 | NW_001811420.1 | + | 2275    | 2331    |
| Aae-1-171 | NW_001811662.1 | + | 18521   | 18576   |
| Aae-1-172 | NW_001811373.1 | + | 186502  | 186561  |
| Aae-1-173 | NW_001811366.1 | - | 387249  | 387189  |
| Aae-1-174 | NW_001811351.1 | - | 4872453 | 4872398 |
| Aae-1-175 | NW_001811351.1 | - | 337995  | 337940  |
| Aae-1-176 | NW_001811270.1 | + | 690035  | 690090  |
| Aae-1-177 | NW_001811262.1 | + | 423996  | 424051  |
| Aae-1-178 | NW_001811259.1 | - | 111264  | 111209  |
| Aae-1-179 | NW_001811254.1 | + | 810980  | 811035  |
| Aae-1-180 | NW_001811247.1 | - | 265113  | 265058  |
| Aae-1-181 | NW_001811207.1 | - | 2238412 | 2238357 |
| Aae-1-182 | NW_001811207.1 | - | 2154890 | 2154835 |
| Aae-1-183 | NW_001811200.1 | - | 681570  | 681515  |
| Aae-1-184 | NW_001811157.1 | + | 588287  | 588342  |
| Aae-1-185 | NW_001811138.1 | - | 758099  | 758044  |
| Aae-1-186 | NW_001810696.1 | - | 760281  | 760226  |
| Aae-1-187 | NW_001811130.1 | - | 2638197 | 2638142 |
| Aae-1-188 | NW_001811097.1 | + | 1107533 | 1107588 |
| Aae-1-189 | NW_001811090.1 | + | 178307  | 178362  |
| Aae-1-190 | NW_001810728.1 | + | 719101  | 719156  |

|           |                |   |         |         |
|-----------|----------------|---|---------|---------|
| Aae-1-191 | NW_001811085.1 | - | 1273777 | 1273722 |
| Aae-1-192 | NW_001810702.1 | - | 943087  | 943032  |
| Aae-1-193 | NW_001811484.1 | - | 607634  | 607579  |
| Aae-1-194 | NW_001811696.1 | - | 877158  | 877103  |
| Aae-1-195 | NW_001811078.1 | - | 556166  | 556111  |
| Aae-1-196 | NW_001811068.1 | + | 1040909 | 1040964 |
| Aae-1-197 | NW_001811043.1 | + | 1234666 | 1234721 |
| Aae-1-198 | NW_001811032.1 | - | 1168034 | 1167979 |
| Aae-1-199 | NW_001811007.1 | - | 3297936 | 3297881 |
| Aae-1-200 | NW_001810189.1 | - | 1450275 | 1450220 |
| Aae-1-201 | NW_001811005.1 | + | 949981  | 950036  |
| Aae-1-202 | NW_001811002.1 | - | 985199  | 985144  |
| Aae-1-203 | NW_001810997.1 | + | 707894  | 707949  |
| Aae-1-204 | NW_001810997.1 | + | 1457476 | 1457531 |
| Aae-1-205 | NW_001811507.1 | - | 330037  | 329982  |
| Aae-1-206 | NW_001810964.1 | + | 981334  | 981389  |
| Aae-1-207 | NW_001810490.1 | + | 1477177 | 1477236 |
| Aae-1-208 | NW_001810955.1 | - | 2882175 | 2882120 |
| Aae-1-209 | NW_001810944.1 | + | 260530  | 260585  |
| Aae-1-210 | NW_001810913.1 | + | 1072295 | 1072350 |
| Aae-1-211 | NW_001810818.1 | - | 1425308 | 1425253 |
| Aae-1-212 | NW_001810813.1 | - | 302019  | 301964  |
| Aae-1-213 | NW_001810805.1 | - | 1703619 | 1703564 |
| Aae-1-214 | NW_001810763.1 | - | 799328  | 799273  |
| Aae-1-215 | NW_001810425.1 | + | 1927610 | 1927665 |
| Aae-1-216 | NW_001810960.1 | - | 952063  | 952008  |
| Aae-1-217 | NW_001810681.1 | - | 113716  | 113661  |
| Aae-1-218 | NW_001810666.1 | - | 126943  | 126888  |
| Aae-1-219 | NW_001810637.1 | + | 903893  | 903948  |
| Aae-1-220 | NW_001810537.1 | - | 3257    | 3202    |
| Aae-1-221 | NW_001810447.1 | + | 1683838 | 1683893 |
| Aae-1-222 | NW_001810058.1 | + | 220403  | 220458  |
| Aae-1-223 | NW_001810034.1 | + | 1138599 | 1138654 |
| Aae-1-224 | NW_001810023.1 | + | 3677    | 3754    |
| Aae-1-225 | NW_001809878.1 | - | 34838   | 34783   |
| Aae-1-226 | NW_001811750.1 | - | 195764  | 195709  |
| Aae-1-227 | NW_001809827.1 | - | 175357  | 175302  |
| Aae-1-228 | NW_001809801.1 | + | 4908551 | 4908606 |
| Aae-1-229 | NW_001811577.1 | + | 240878  | 240933  |
| Aae-1-230 | NW_001811573.1 | - | 84929   | 84874   |
| Aae-1-231 | NW_001811354.1 | + | 325238  | 325293  |
| Aae-1-232 | NW_001811276.1 | - | 716580  | 716525  |
| Aae-1-233 | NW_001809935.1 | - | 1511089 | 1511034 |
| Aae-1-234 | NW_001811318.1 | - | 366033  | 365981  |
| Aae-1-235 | NW_001811142.1 | - | 520693  | 520640  |
| Aae-1-236 | NW_001811010.1 | + | 1002012 | 1002067 |
| Aae-1-237 | NW_001809847.1 | + | 130853  | 130908  |
| Aae-1-238 | NW_001809847.1 | + | 132604  | 132659  |
| Aae-1-239 | NW_001810750.1 | + | 462213  | 462268  |
| Aae-1-240 | NW_001810919.1 | - | 230695  | 230640  |
| Aae-1-241 | NW_001811089.1 | - | 432994  | 432939  |
| Aae-1-242 | NW_001811118.1 | + | 1546757 | 1546812 |

|           |                |   |         |         |
|-----------|----------------|---|---------|---------|
| Aae-1-243 | NW_001811142.1 | + | 793165  | 793220  |
| Aae-1-244 | NW_001811224.1 | - | 540515  | 540460  |
| Aae-1-245 | NW_001811562.1 | + | 2095623 | 2095678 |
| Aae-1-246 | NW_001809803.1 | + | 1639249 | 1639305 |
| Aae-1-247 | NW_001811039.1 | - | 322934  | 322878  |
| Aae-1-248 | NW_001811063.1 | - | 1186898 | 1186842 |
| Aae-1-249 | NW_001811410.1 | + | 354766  | 354822  |
| Aae-1-250 | NW_001810332.1 | + | 75469   | 75524   |
| Aae-1-251 | NW_001810715.1 | - | 1200721 | 1200666 |
| Aae-1-252 | NW_001810929.1 | + | 702226  | 702281  |
| Aae-1-253 | NW_001811063.1 | + | 1234919 | 1234974 |
| Aae-1-254 | NW_001811001.1 | + | 177980  | 178035  |
| Aae-1-255 | NW_001811429.1 | + | 724942  | 724997  |
| Aae-1-256 | NW_001811366.1 | - | 10139   | 10084   |
| Aae-1-257 | NW_001811362.1 | - | 278979  | 278913  |
| Aae-1-258 | NW_001811228.1 | - | 161702  | 161646  |
| Aae-1-259 | NW_001811028.1 | + | 784852  | 784909  |
| Aae-1-260 | NW_001809983.1 | - | 6141    | 6086    |
| Aae-1-261 | NW_001810011.1 | - | 1988789 | 1988737 |
| Aae-1-262 | NW_001809890.1 | - | 167600  | 167548  |
| Aae-1-263 | NW_001811780.1 | + | 236319  | 236378  |
| Aae-1-264 | NW_001811584.1 | - | 83101   | 83046   |
| Aae-1-265 | NW_001811207.1 | - | 1492251 | 1492198 |
| Aae-1-266 | NW_001811074.1 | + | 1501853 | 1501906 |
| Aae-1-267 | NW_001811047.1 | + | 747280  | 747335  |
| Aae-1-268 | NW_001811003.1 | + | 441253  | 441306  |
| Aae-1-269 | NW_001810955.1 | + | 711263  | 711318  |
| Aae-1-270 | NW_001810784.1 | - | 1237517 | 1237462 |
| Aae-1-271 | NW_001810307.1 | + | 754045  | 754098  |
| Aae-1-272 | NW_001810231.1 | + | 265335  | 265390  |
| Aae-1-273 | NW_001810200.1 | - | 524719  | 524666  |
| Aae-1-274 | NW_001810154.1 | - | 84180   | 84127   |
| Aae-1-275 | NW_001809811.1 | - | 202191  | 202136  |
| Aae-1-276 | NW_001810242.1 | + | 3331796 | 3331850 |
| Aae-1-277 | NW_001837144.1 | - | 10807   | 10752   |
| Aae-1-278 | NW_001811777.1 | - | 44309   | 44254   |
| Aae-1-279 | NW_001809901.1 | + | 542367  | 542422  |
| Aae-1-280 | NW_001811473.1 | - | 254615  | 254560  |
| Aae-1-281 | NW_001811742.1 | + | 332527  | 332582  |
| Aae-1-282 | NW_001811719.1 | - | 334906  | 334851  |
| Aae-1-283 | NW_001810999.1 | + | 1025780 | 1025835 |
| Aae-1-284 | NW_001811247.1 | - | 357168  | 357113  |
| Aae-1-285 | NW_001811680.1 | - | 312847  | 312792  |
| Aae-1-286 | NW_001811669.1 | - | 349823  | 349768  |
| Aae-1-287 | NW_001811660.1 | + | 265028  | 265083  |
| Aae-1-288 | NW_001811650.1 | + | 88233   | 88288   |
| Aae-1-289 | NW_001811628.1 | - | 252942  | 252887  |
| Aae-1-290 | NW_001811621.1 | - | 83021   | 82966   |
| Aae-1-291 | NW_001811618.1 | - | 595348  | 595293  |
| Aae-1-292 | NW_001811600.1 | - | 150303  | 150248  |
| Aae-1-293 | NW_001810905.1 | - | 1630830 | 1630775 |
| Aae-1-294 | NW_001811597.1 | - | 4847    | 4792    |

|           |                |   |         |         |
|-----------|----------------|---|---------|---------|
| Aae-1-295 | NW_001811596.1 | - | 1365805 | 1365750 |
| Aae-1-296 | NW_001811560.1 | - | 139398  | 139343  |
| Aae-1-297 | NW_001811524.1 | - | 523305  | 523250  |
| Aae-1-298 | NW_001811491.1 | - | 277930  | 277875  |
| Aae-1-299 | NW_001811486.1 | - | 283532  | 283477  |
| Aae-1-300 | NW_001810681.1 | + | 337652  | 337707  |
| Aae-1-301 | NW_001810945.1 | - | 948459  | 948404  |
| Aae-1-302 | NW_001811465.1 | + | 312561  | 312616  |
| Aae-1-303 | NW_001811107.1 | - | 1285625 | 1285570 |
| Aae-1-304 | NW_001810100.1 | + | 2018198 | 2018253 |
| Aae-1-305 | NW_001811463.1 | + | 2774368 | 2774423 |
| Aae-1-306 | NW_001810783.1 | + | 1665361 | 1665416 |
| Aae-1-307 | NW_001811462.1 | + | 2660709 | 2660764 |
| Aae-1-308 | NW_001811460.1 | - | 459664  | 459609  |
| Aae-1-309 | NW_001811448.1 | + | 31502   | 31557   |
| Aae-1-310 | NW_001811444.1 | - | 441601  | 441546  |
| Aae-1-311 | NW_001810305.1 | - | 172585  | 172530  |
| Aae-1-312 | NW_001810296.1 | - | 2172728 | 2172674 |
| Aae-1-313 | NW_001810178.1 | - | 712227  | 712172  |
| Aae-1-314 | NW_001810629.1 | + | 398240  | 398295  |
| Aae-1-315 | NW_001810214.1 | + | 22643   | 22699   |
| Aae-1-316 | NW_001810941.1 | - | 171933  | 171878  |
| Aae-1-317 | NW_001811772.1 | + | 1220977 | 1221046 |
| Aae-1-318 | NW_001811263.1 | + | 2948150 | 2948205 |
| Aae-1-319 | NW_001811385.1 | - | 1178664 | 1178607 |
| Aae-1-320 | NW_001810242.1 | - | 2632724 | 2632669 |
| Aae-1-321 | NW_001811083.1 | + | 939248  | 939306  |
| Aae-1-322 | NW_001811194.1 | - | 226379  | 226324  |
| Aae-1-323 | NW_001811429.1 | + | 2808809 | 2808864 |
| Aae-1-324 | NW_001811502.1 | - | 471794  | 471739  |
| Aae-1-325 | NW_001811418.1 | + | 2941289 | 2941344 |
| Aae-1-326 | NW_001811396.1 | + | 1954758 | 1954813 |
| Aae-1-327 | NW_001811385.1 | - | 428879  | 428824  |
| Aae-1-328 | NW_001811384.1 | - | 222374  | 222319  |
| Aae-1-329 | NW_001811346.1 | - | 475674  | 475619  |
| Aae-1-330 | NW_001811346.1 | + | 310558  | 310613  |
| Aae-1-331 | NW_001811339.1 | - | 505239  | 505184  |
| Aae-1-332 | NW_001811626.1 | - | 70200   | 70145   |
| Aae-1-333 | NW_001811207.1 | - | 2831382 | 2831327 |
| Aae-1-334 | NW_001811322.1 | + | 658790  | 658845  |
| Aae-1-335 | NW_001811312.1 | + | 517723  | 517778  |
| Aae-1-336 | NW_001810122.1 | + | 234215  | 234270  |
| Aae-1-337 | NW_001811281.1 | - | 155012  | 154957  |
| Aae-1-338 | NW_001811274.1 | + | 2149495 | 2149550 |
| Aae-1-339 | NW_001811272.1 | + | 575636  | 575691  |
| Aae-1-340 | NW_001811038.1 | + | 1184375 | 1184430 |
| Aae-1-341 | NW_001811354.1 | - | 535343  | 535288  |
| Aae-1-342 | NW_001811263.1 | + | 12428   | 12483   |
| Aae-1-343 | NW_001811252.1 | + | 247831  | 247886  |
| Aae-1-344 | NW_001811252.1 | - | 1579512 | 1579457 |
| Aae-1-345 | NW_001811237.1 | + | 561293  | 561348  |
| Aae-1-346 | NW_001811232.1 | + | 529670  | 529725  |



|           |                |   |         |         |
|-----------|----------------|---|---------|---------|
| Aae-1-347 | NW_001811208.1 | + | 809001  | 809056  |
| Aae-1-348 | NW_001811195.1 | - | 511947  | 511892  |
| Aae-1-349 | NW_001811499.1 | - | 452388  | 452333  |
| Aae-1-350 | NW_001811184.1 | + | 388211  | 388266  |
| Aae-1-351 | NW_001811149.1 | - | 554827  | 554772  |
| Aae-1-352 | NW_001811141.1 | + | 1953415 | 1953470 |
| Aae-1-353 | NW_001811133.1 | + | 223213  | 223268  |
| Aae-1-354 | NW_001811123.1 | + | 706551  | 706606  |
| Aae-1-355 | NW_001811119.1 | - | 965270  | 965215  |
| Aae-1-356 | NW_001811109.1 | + | 849782  | 849837  |
| Aae-1-357 | NW_001811097.1 | - | 30887   | 30832   |
| Aae-1-358 | NW_001811096.1 | + | 3121232 | 3121287 |
| Aae-1-359 | NW_001811067.1 | - | 694091  | 694036  |
| Aae-1-360 | NW_001811065.1 | - | 784067  | 784012  |
| Aae-1-361 | NW_001811052.1 | + | 428051  | 428106  |
| Aae-1-362 | NW_001811044.1 | + | 220141  | 220196  |
| Aae-1-363 | NW_001811043.1 | - | 795949  | 795894  |
| Aae-1-364 | NW_001811042.1 | - | 1256382 | 1256327 |
| Aae-1-365 | NW_001811032.1 | + | 1168042 | 1168097 |
| Aae-1-366 | NW_001811029.1 | - | 28642   | 28587   |
| Aae-1-367 | NW_001811016.1 | - | 8977    | 8922    |
| Aae-1-368 | NW_001811008.1 | - | 952082  | 952027  |
| Aae-1-369 | NW_001810996.1 | - | 3721244 | 3721189 |
| Aae-1-370 | NW_001810988.1 | + | 976513  | 976568  |
| Aae-1-371 | NW_001810984.1 | + | 2285400 | 2285455 |
| Aae-1-372 | NW_001810959.1 | - | 1022265 | 1022210 |
| Aae-1-373 | NW_001810954.1 | - | 428108  | 428053  |
| Aae-1-374 | NW_001810937.1 | + | 1011279 | 1011334 |
| Aae-1-375 | NW_001810912.1 | + | 2308353 | 2308408 |
| Aae-1-376 | NW_001810912.1 | - | 149422  | 149367  |
| Aae-1-377 | NW_001810864.1 | - | 814291  | 814236  |
| Aae-1-378 | NW_001810783.1 | + | 3745869 | 3745924 |
| Aae-1-379 | NW_001810782.1 | - | 3061385 | 3061330 |
| Aae-1-380 | NW_001810763.1 | - | 824502  | 824447  |
| Aae-1-381 | NW_001810736.1 | + | 1297755 | 1297810 |
| Aae-1-382 | NW_001810721.1 | + | 197857  | 197912  |
| Aae-1-383 | NW_001810715.1 | - | 1870244 | 1870189 |
| Aae-1-384 | NW_001810708.1 | - | 635213  | 635158  |
| Aae-1-385 | NW_001810637.1 | + | 1018466 | 1018521 |
| Aae-1-386 | NW_001811221.1 | + | 760682  | 760737  |
| Aae-1-387 | NW_001810519.1 | - | 153852  | 153797  |
| Aae-1-388 | NW_001810490.1 | + | 369105  | 369160  |
| Aae-1-389 | NW_001810469.1 | + | 276392  | 276448  |
| Aae-1-390 | NW_001810447.1 | + | 1573797 | 1573852 |
| Aae-1-391 | NW_001810361.1 | - | 1875347 | 1875292 |
| Aae-1-392 | NW_001810286.1 | - | 1158935 | 1158880 |
| Aae-1-393 | NW_001810275.1 | - | 1518754 | 1518699 |
| Aae-1-394 | NW_001810254.1 | - | 1693905 | 1693850 |
| Aae-1-395 | NW_001810241.1 | - | 67841   | 67786   |
| Aae-1-396 | NW_001810133.1 | + | 1157403 | 1157458 |
| Aae-1-397 | NW_001810111.1 | + | 299331  | 299386  |
| Aae-1-398 | NW_001810080.1 | + | 130741  | 130796  |

|           |                |   |         |         |
|-----------|----------------|---|---------|---------|
| Aae-1-399 | NW_001810034.1 | - | 1222479 | 1222424 |
| Aae-1-400 | NW_001809932.1 | - | 41826   | 41771   |
| Aae-1-401 | NW_001809912.1 | - | 4021674 | 4021619 |
| Aae-1-402 | NW_001809912.1 | - | 147212  | 147157  |
| Aae-1-403 | NW_001809869.1 | - | 206624  | 206569  |
| Aae-1-404 | NW_001809857.1 | + | 1470351 | 1470406 |
| Aae-1-405 | NW_001809822.1 | + | 228015  | 228071  |
| Aae-1-406 | NW_001809802.1 | - | 4454584 | 4454529 |
| Aae-1-407 | NW_001809802.1 | + | 4142354 | 4142409 |
| Aae-1-408 | NW_001809802.1 | + | 205357  | 205412  |
| Aae-1-409 | NW_001811121.1 | - | 968739  | 968684  |
| Aae-1-410 | NW_001811502.1 | - | 428420  | 428369  |
| Aae-1-411 | NW_001810197.1 | + | 24010   | 24065   |
| Aae-1-412 | NW_001810920.1 | - | 1664213 | 1664162 |
| Aae-1-413 | NW_001811052.1 | - | 999242  | 999187  |
| Aae-1-414 | NW_001811029.1 | - | 1073328 | 1073273 |
| Aae-1-415 | NW_001809869.1 | - | 60166   | 60111   |
| Aae-1-416 | NW_001811596.1 | + | 494526  | 494578  |
| Aae-1-417 | NW_001811369.1 | + | 108046  | 108098  |
| Aae-1-418 | NW_001811307.1 | + | 1132030 | 1132085 |
| Aae-1-419 | NW_001810307.1 | + | 1247710 | 1247762 |
| Aae-1-420 | NW_001811207.1 | - | 2686639 | 2686587 |
| Aae-1-421 | NW_001811551.1 | + | 2084526 | 2084578 |
| Aae-1-422 | NW_001811241.1 | + | 558021  | 558073  |
| Aae-1-423 | NW_001811218.1 | + | 2360523 | 2360578 |
| Aae-1-424 | NW_001811038.1 | + | 997641  | 997693  |
| Aae-1-425 | NW_001810895.1 | - | 836298  | 836246  |
| Aae-1-426 | NW_001811380.1 | + | 557860  | 557912  |
| Aae-1-427 | NW_001811763.1 | - | 221052  | 220999  |
| Aae-1-428 | NW_001811680.1 | + | 6587    | 6640    |
| Aae-1-429 | NW_001811279.1 | - | 625273  | 625220  |
| Aae-1-430 | NW_001811229.1 | + | 731658  | 731711  |
| Aae-1-431 | NW_001811140.1 | - | 137204  | 137151  |
| Aae-1-432 | NW_001810197.1 | - | 23990   | 23937   |
| Aae-1-433 | NW_001810242.1 | - | 2624487 | 2624432 |
| Aae-1-434 | NW_001810955.1 | + | 2513023 | 2513076 |
| Aae-1-435 | NW_001811026.1 | + | 1076831 | 1076884 |
| Aae-1-436 | NW_001811621.1 | - | 16493   | 16440   |
| Aae-1-437 | NW_001810935.1 | - | 44071   | 44018   |
| Aae-1-438 | NW_001811296.1 | - | 239941  | 239888  |
| Aae-1-439 | NW_001811220.1 | - | 319359  | 319304  |
| Aae-1-440 | NW_001811688.1 | - | 17933   | 17878   |
| Aae-1-441 | NW_001811688.1 | - | 3880    | 3825    |
| Aae-1-442 | NW_001811418.1 | - | 2461421 | 2461368 |
| Aae-1-443 | NW_001810715.1 | + | 202812  | 202867  |
| Aae-1-444 | NW_001811252.1 | - | 2812965 | 2812912 |
| Aae-1-445 | NW_001809834.1 | - | 198865  | 198810  |
| Aae-1-446 | NW_001811335.1 | + | 246204  | 246257  |
| Aae-1-447 | NW_001811274.1 | + | 1420205 | 1420258 |
| Aae-1-448 | NW_001810805.1 | - | 660973  | 660918  |
| Aae-1-449 | NW_001811417.1 | + | 381411  | 381464  |
| Aae-1-450 | NW_001811196.1 | - | 2945024 | 2944971 |

|           |                |   |         |         |
|-----------|----------------|---|---------|---------|
| Aae-1-451 | NW_001811018.1 | - | 4971342 | 4971289 |
| Aae-1-452 | NW_001810979.1 | + | 467282  | 467335  |
| Aae-1-453 | NW_001810972.1 | + | 94879   | 94932   |
| Aae-1-454 | NW_001810972.1 | - | 71229   | 71176   |
| Aae-1-455 | NW_001810962.1 | + | 930488  | 930541  |
| Aae-1-456 | NW_001810880.1 | - | 1911339 | 1911286 |
| Aae-1-457 | NW_001810830.1 | - | 1256826 | 1256773 |
| Aae-1-458 | NW_001810696.1 | - | 968526  | 968473  |
| Aae-1-459 | NW_001810458.1 | + | 3338261 | 3338314 |
| Aae-1-460 | NW_001810102.1 | + | 91822   | 91875   |
| Aae-1-461 | NW_001810133.1 | + | 1306467 | 1306520 |
| Aae-1-462 | NW_001810034.1 | - | 2068451 | 2068398 |
| Aae-1-463 | NW_001810023.1 | + | 2343083 | 2343136 |
| Aae-1-464 | NW_001809890.1 | - | 1338742 | 1338689 |
| Aae-1-465 | NW_001809819.1 | + | 143808  | 143861  |
| Aae-1-466 | NW_001810830.1 | - | 802137  | 802081  |
| Aae-1-467 | NW_001810728.1 | + | 814852  | 814906  |
| Aae-1-468 | NW_001810838.1 | - | 501539  | 501485  |
| Aae-1-469 | NW_001810599.1 | + | 330252  | 330306  |
| Aae-1-470 | NW_001810993.1 | + | 39726   | 39780   |
| Aae-1-471 | NW_001811218.1 | - | 455398  | 455343  |
| Aae-1-472 | NW_001811009.1 | - | 261513  | 261459  |
| Aae-1-473 | NW_001810912.1 | - | 768002  | 767948  |
| Aae-1-474 | NW_001811761.1 | + | 66882   | 66937   |
| Aae-1-475 | NW_001811761.1 | - | 66856   | 66801   |
| Aae-1-476 | NW_001811711.1 | + | 277761  | 277816  |
| Aae-1-477 | NW_001811669.1 | + | 349849  | 349904  |
| Aae-1-478 | NW_001810480.1 | - | 1209910 | 1209855 |
| Aae-1-479 | NW_001810825.1 | - | 174750  | 174695  |
| Aae-1-480 | NW_001810855.1 | - | 182726  | 182671  |
| Aae-1-481 | NW_001811253.1 | + | 648758  | 648813  |
| Aae-1-482 | NW_001811485.1 | + | 2988234 | 2988289 |
| Aae-1-483 | NW_001811225.1 | + | 447053  | 447108  |
| Aae-1-484 | NW_001811003.1 | + | 651605  | 651660  |
| Aae-1-485 | NW_001811428.1 | - | 546778  | 546723  |
| Aae-1-486 | NW_001811621.1 | + | 71186   | 71241   |
| Aae-1-487 | NW_001810508.1 | + | 148079  | 148134  |
| Aae-1-488 | NW_001810527.1 | + | 1540481 | 1540536 |
| Aae-1-489 | NW_001810231.1 | + | 594824  | 594880  |
| Aae-1-490 | NW_001809801.1 | + | 1512268 | 1512322 |
| Aae-1-491 | NW_001809801.1 | + | 254353  | 254408  |
| Aae-1-492 | NW_001809801.1 | + | 3712797 | 3712852 |
| Aae-1-493 | NW_001809801.1 | + | 5251690 | 5251745 |
| Aae-1-494 | NW_001809801.1 | - | 1507958 | 1507903 |
| Aae-1-495 | NW_001809802.1 | + | 70873   | 70928   |
| Aae-1-496 | NW_001809802.1 | + | 570865  | 570920  |
| Aae-1-497 | NW_001809802.1 | + | 573561  | 573616  |
| Aae-1-498 | NW_001809802.1 | + | 915399  | 915454  |
| Aae-1-499 | NW_001809802.1 | + | 2006804 | 2006859 |
| Aae-1-500 | NW_001809802.1 | + | 3161631 | 3161686 |
| Aae-1-501 | NW_001809802.1 | + | 3335012 | 3335067 |
| Aae-1-502 | NW_001809802.1 | + | 3474017 | 3474072 |

|           |                |   |         |         |
|-----------|----------------|---|---------|---------|
| Aae-1-503 | NW_001809802.1 | - | 3333759 | 3333704 |
| Aae-1-504 | NW_001809802.1 | - | 568162  | 568107  |
| Aae-1-505 | NW_001809802.1 | - | 565465  | 565410  |
| Aae-1-506 | NW_001809803.1 | + | 2496043 | 2496098 |
| Aae-1-507 | NW_001809806.1 | - | 12006   | 11951   |
| Aae-1-508 | NW_001809807.1 | + | 219215  | 219270  |
| Aae-1-509 | NW_001809807.1 | - | 106533  | 106478  |
| Aae-1-510 | NW_001809808.1 | + | 153507  | 153562  |
| Aae-1-511 | NW_001809809.1 | - | 148647  | 148592  |
| Aae-1-512 | NW_001809814.1 | - | 1579691 | 1579636 |
| Aae-1-513 | NW_001809820.1 | - | 284806  | 284751  |
| Aae-1-514 | NW_001809822.1 | - | 227981  | 227926  |
| Aae-1-515 | NW_001809825.1 | - | 830663  | 830608  |
| Aae-1-516 | NW_001809836.1 | + | 882742  | 882797  |
| Aae-1-517 | NW_001809836.1 | - | 900792  | 900737  |
| Aae-1-518 | NW_001809836.1 | - | 882305  | 882250  |
| Aae-1-519 | NW_001809838.1 | + | 106065  | 106120  |
| Aae-1-520 | NW_001809838.1 | - | 215466  | 215411  |
| Aae-1-521 | NW_001809841.1 | + | 296054  | 296109  |
| Aae-1-522 | NW_001809842.1 | + | 118174  | 118229  |
| Aae-1-523 | NW_001809842.1 | + | 144085  | 144140  |
| Aae-1-524 | NW_001809842.1 | - | 115283  | 115228  |
| Aae-1-525 | NW_001809843.1 | + | 136619  | 136674  |
| Aae-1-526 | NW_001809847.1 | + | 1304719 | 1304774 |
| Aae-1-527 | NW_001809847.1 | - | 2444655 | 2444600 |
| Aae-1-528 | NW_001809850.1 | - | 13223   | 13168   |
| Aae-1-529 | NW_001809857.1 | - | 1441693 | 1441638 |
| Aae-1-530 | NW_001809857.1 | - | 650923  | 650868  |
| Aae-1-531 | NW_001809863.1 | - | 28491   | 28436   |
| Aae-1-532 | NW_001809867.1 | + | 158738  | 158793  |
| Aae-1-533 | NW_001809877.1 | - | 206936  | 206881  |
| Aae-1-534 | NW_001809879.1 | - | 556446  | 556391  |
| Aae-1-535 | NW_001809880.1 | + | 236019  | 236074  |
| Aae-1-536 | NW_001809880.1 | + | 249911  | 249966  |
| Aae-1-537 | NW_001809890.1 | + | 1378667 | 1378722 |
| Aae-1-538 | NW_001809894.1 | - | 167195  | 167140  |
| Aae-1-539 | NW_001809901.1 | + | 66747   | 66802   |
| Aae-1-540 | NW_001809901.1 | + | 2176978 | 2177033 |
| Aae-1-541 | NW_001809901.1 | - | 251262  | 251207  |
| Aae-1-542 | NW_001809903.1 | + | 213493  | 213548  |
| Aae-1-543 | NW_001809912.1 | + | 1111054 | 1111109 |
| Aae-1-544 | NW_001809912.1 | + | 4084773 | 4084828 |
| Aae-1-545 | NW_001809912.1 | + | 4141024 | 4141079 |
| Aae-1-546 | NW_001809912.1 | - | 2568275 | 2568220 |
| Aae-1-547 | NW_001809913.1 | + | 360302  | 360357  |
| Aae-1-548 | NW_001809913.1 | - | 252137  | 252082  |
| Aae-1-549 | NW_001809921.1 | - | 86657   | 86602   |
| Aae-1-550 | NW_001809922.1 | + | 37930   | 37985   |
| Aae-1-551 | NW_001809924.1 | - | 436056  | 436001  |
| Aae-1-552 | NW_001809927.1 | + | 22018   | 22073   |
| Aae-1-553 | NW_001809930.1 | - | 270450  | 270395  |
| Aae-1-554 | NW_001809931.1 | + | 162563  | 162618  |

|           |                |   |         |         |
|-----------|----------------|---|---------|---------|
| Aae-1-555 | NW_001809935.1 | + | 2364775 | 2364830 |
| Aae-1-556 | NW_001809946.1 | + | 2065788 | 2065843 |
| Aae-1-557 | NW_001809946.1 | - | 2263408 | 2263353 |
| Aae-1-558 | NW_001809956.1 | + | 32233   | 32288   |
| Aae-1-559 | NW_001809956.1 | - | 30695   | 30640   |
| Aae-1-560 | NW_001809957.1 | - | 2240764 | 2240709 |
| Aae-1-561 | NW_001809958.1 | - | 122073  | 122018  |
| Aae-1-562 | NW_001809964.1 | - | 191465  | 191410  |
| Aae-1-563 | NW_001809967.1 | + | 14305   | 14360   |
| Aae-1-564 | NW_001809968.1 | + | 43126   | 43181   |
| Aae-1-565 | NW_001809968.1 | + | 2407901 | 2407956 |
| Aae-1-566 | NW_001809974.1 | - | 135356  | 135301  |
| Aae-1-567 | NW_001809982.1 | - | 209742  | 209687  |
| Aae-1-568 | NW_001809989.1 | + | 13      | 68      |
| Aae-1-569 | NW_001809989.1 | - | 1872121 | 1872066 |
| Aae-1-570 | NW_001809990.1 | + | 65606   | 65661   |
| Aae-1-571 | NW_001810000.1 | + | 453602  | 453657  |
| Aae-1-572 | NW_001810000.1 | + | 1723910 | 1723965 |
| Aae-1-573 | NW_001810000.1 | + | 2175704 | 2175759 |
| Aae-1-574 | NW_001810000.1 | + | 2270868 | 2270923 |
| Aae-1-575 | NW_001810000.1 | - | 472219  | 472164  |
| Aae-1-576 | NW_001810004.1 | + | 181545  | 181600  |
| Aae-1-577 | NW_001810011.1 | - | 1075932 | 1075877 |
| Aae-1-578 | NW_001810011.1 | - | 110931  | 110876  |
| Aae-1-579 | NW_001810019.1 | + | 91480   | 91535   |
| Aae-1-580 | NW_001810019.1 | + | 197578  | 197633  |
| Aae-1-581 | NW_001810022.1 | + | 352122  | 352177  |
| Aae-1-582 | NW_001810022.1 | + | 2937240 | 2937295 |
| Aae-1-583 | NW_001810022.1 | - | 4148424 | 4148369 |
| Aae-1-584 | NW_001810022.1 | - | 4099925 | 4099870 |
| Aae-1-585 | NW_001810022.1 | - | 3561520 | 3561465 |
| Aae-1-586 | NW_001810022.1 | - | 2545443 | 2545388 |
| Aae-1-587 | NW_001810022.1 | - | 2200447 | 2200392 |
| Aae-1-588 | NW_001810022.1 | - | 1480352 | 1480297 |
| Aae-1-589 | NW_001810022.1 | - | 852958  | 852903  |
| Aae-1-590 | NW_001810023.1 | - | 792969  | 792914  |
| Aae-1-591 | NW_001810027.1 | - | 145800  | 145745  |
| Aae-1-592 | NW_001810029.1 | + | 189151  | 189206  |
| Aae-1-593 | NW_001810034.1 | + | 613932  | 613987  |
| Aae-1-594 | NW_001810034.1 | + | 1522388 | 1522443 |
| Aae-1-595 | NW_001810034.1 | - | 1643757 | 1643702 |
| Aae-1-596 | NW_001810034.1 | - | 1457952 | 1457897 |
| Aae-1-597 | NW_001810034.1 | - | 340996  | 340941  |
| Aae-1-598 | NW_001810037.1 | + | 179044  | 179099  |
| Aae-1-599 | NW_001810038.1 | + | 176410  | 176465  |
| Aae-1-600 | NW_001810040.1 | + | 179373  | 179428  |
| Aae-1-601 | NW_001810050.1 | + | 156467  | 156522  |
| Aae-1-602 | NW_001810052.1 | + | 22746   | 22801   |
| Aae-1-603 | NW_001810052.1 | - | 19559   | 19504   |
| Aae-1-604 | NW_001810056.1 | - | 1481610 | 1481555 |
| Aae-1-605 | NW_001810056.1 | - | 763318  | 763263  |
| Aae-1-606 | NW_001810067.1 | + | 2338274 | 2338329 |

|           |                |   |         |         |
|-----------|----------------|---|---------|---------|
| Aae-1-607 | NW_001810067.1 | - | 1587133 | 1587078 |
| Aae-1-608 | NW_001810067.1 | - | 1545839 | 1545784 |
| Aae-1-609 | NW_001810067.1 | - | 1356368 | 1356313 |
| Aae-1-610 | NW_001810067.1 | - | 613208  | 613153  |
| Aae-1-611 | NW_001810070.1 | - | 134021  | 133966  |
| Aae-1-612 | NW_001810072.1 | + | 121289  | 121344  |
| Aae-1-613 | NW_001810089.1 | + | 1542204 | 1542259 |
| Aae-1-614 | NW_001810089.1 | - | 2235769 | 2235714 |
| Aae-1-615 | NW_001810089.1 | - | 2172314 | 2172259 |
| Aae-1-616 | NW_001810089.1 | - | 2076039 | 2075984 |
| Aae-1-617 | NW_001810089.1 | - | 98619   | 98564   |
| Aae-1-618 | NW_001810090.1 | - | 117855  | 117800  |
| Aae-1-619 | NW_001810091.1 | - | 45781   | 45726   |
| Aae-1-620 | NW_001810096.1 | - | 124362  | 124307  |
| Aae-1-621 | NW_001810100.1 | + | 1499153 | 1499208 |
| Aae-1-622 | NW_001810100.1 | + | 2068236 | 2068291 |
| Aae-1-623 | NW_001810102.1 | - | 4130    | 4075    |
| Aae-1-624 | NW_001810106.1 | + | 149716  | 149771  |
| Aae-1-625 | NW_001810111.1 | + | 1261469 | 1261524 |
| Aae-1-626 | NW_001810111.1 | + | 2143782 | 2143837 |
| Aae-1-627 | NW_001810111.1 | + | 2225535 | 2225590 |
| Aae-1-628 | NW_001810111.1 | - | 1022873 | 1022818 |
| Aae-1-629 | NW_001810114.1 | - | 122475  | 122420  |
| Aae-1-630 | NW_001810117.1 | + | 99875   | 99930   |
| Aae-1-631 | NW_001810118.1 | - | 108582  | 108527  |
| Aae-1-632 | NW_001810119.1 | + | 127832  | 127887  |
| Aae-1-633 | NW_001810119.1 | - | 125273  | 125218  |
| Aae-1-634 | NW_001810122.1 | + | 475439  | 475494  |
| Aae-1-635 | NW_001810122.1 | + | 1767554 | 1767609 |
| Aae-1-636 | NW_001810126.1 | - | 40710   | 40655   |
| Aae-1-637 | NW_001810130.1 | + | 54948   | 55003   |
| Aae-1-638 | NW_001810133.1 | - | 3725703 | 3725648 |
| Aae-1-639 | NW_001810133.1 | - | 3368378 | 3368323 |
| Aae-1-640 | NW_001810133.1 | - | 1950672 | 1950617 |
| Aae-1-641 | NW_001810133.1 | - | 981440  | 981385  |
| Aae-1-642 | NW_001810133.1 | - | 781047  | 780992  |
| Aae-1-643 | NW_001810133.1 | - | 594057  | 594002  |
| Aae-1-644 | NW_001810134.1 | - | 962905  | 962850  |
| Aae-1-645 | NW_001810134.1 | - | 548030  | 547975  |
| Aae-1-646 | NW_001810134.1 | - | 169380  | 169325  |
| Aae-1-647 | NW_001810145.1 | + | 182829  | 182884  |
| Aae-1-648 | NW_001810145.1 | + | 185192  | 185247  |
| Aae-1-649 | NW_001810156.1 | + | 1152147 | 1152202 |
| Aae-1-650 | NW_001810156.1 | - | 1072542 | 1072487 |
| Aae-1-651 | NW_001810156.1 | - | 331744  | 331689  |
| Aae-1-652 | NW_001810166.1 | + | 21293   | 21348   |
| Aae-1-653 | NW_001810167.1 | + | 460592  | 460647  |
| Aae-1-654 | NW_001810167.1 | + | 746436  | 746491  |
| Aae-1-655 | NW_001810167.1 | + | 2233276 | 2233331 |
| Aae-1-656 | NW_001810167.1 | - | 1885087 | 1885032 |
| Aae-1-657 | NW_001810167.1 | - | 1618341 | 1618286 |
| Aae-1-658 | NW_001810167.1 | - | 643674  | 643619  |

|           |                |   |         |         |
|-----------|----------------|---|---------|---------|
| Aae-1-659 | NW_001810170.1 | + | 117035  | 117090  |
| Aae-1-660 | NW_001810174.1 | - | 25950   | 25895   |
| Aae-1-661 | NW_001810178.1 | + | 174934  | 174989  |
| Aae-1-662 | NW_001810178.1 | + | 949955  | 950010  |
| Aae-1-663 | NW_001810189.1 | + | 767692  | 767747  |
| Aae-1-664 | NW_001810189.1 | - | 164673  | 164618  |
| Aae-1-665 | NW_001810196.1 | - | 42585   | 42530   |
| Aae-1-666 | NW_001810200.1 | + | 47146   | 47201   |
| Aae-1-667 | NW_001810200.1 | + | 718006  | 718061  |
| Aae-1-668 | NW_001810200.1 | - | 1860138 | 1860083 |
| Aae-1-669 | NW_001810200.1 | - | 78565   | 78510   |
| Aae-1-670 | NW_001810200.1 | - | 46533   | 46478   |
| Aae-1-671 | NW_001810200.1 | - | 43830   | 43775   |
| Aae-1-672 | NW_001810221.1 | - | 1680689 | 1680634 |
| Aae-1-673 | NW_001810221.1 | - | 1197982 | 1197927 |
| Aae-1-674 | NW_001810225.1 | + | 25522   | 25577   |
| Aae-1-675 | NW_001810231.1 | + | 262382  | 262437  |
| Aae-1-676 | NW_001810231.1 | - | 2113705 | 2113650 |
| Aae-1-677 | NW_001810241.1 | - | 97637   | 97582   |
| Aae-1-678 | NW_001810242.1 | + | 907560  | 907615  |
| Aae-1-679 | NW_001810242.1 | + | 1501020 | 1501075 |
| Aae-1-680 | NW_001810242.1 | + | 2195403 | 2195458 |
| Aae-1-681 | NW_001810242.1 | + | 2754740 | 2754795 |
| Aae-1-682 | NW_001810242.1 | + | 3752030 | 3752085 |
| Aae-1-683 | NW_001810242.1 | - | 4324380 | 4324325 |
| Aae-1-684 | NW_001810242.1 | - | 3057645 | 3057590 |
| Aae-1-685 | NW_001810248.1 | - | 55134   | 55079   |
| Aae-1-686 | NW_001810254.1 | + | 743949  | 744004  |
| Aae-1-687 | NW_001810254.1 | - | 409022  | 408967  |
| Aae-1-688 | NW_001810264.1 | + | 152333  | 152388  |
| Aae-1-689 | NW_001810264.1 | + | 847155  | 847210  |
| Aae-1-690 | NW_001810264.1 | - | 150496  | 150441  |
| Aae-1-691 | NW_001810266.1 | - | 4130    | 4075    |
| Aae-1-692 | NW_001810275.1 | + | 635251  | 635306  |
| Aae-1-693 | NW_001810275.1 | - | 1021276 | 1021221 |
| Aae-1-694 | NW_001810285.1 | + | 12718   | 12773   |
| Aae-1-695 | NW_001810286.1 | - | 2039412 | 2039357 |
| Aae-1-696 | NW_001810286.1 | - | 1731365 | 1731310 |
| Aae-1-697 | NW_001810286.1 | - | 191012  | 190957  |
| Aae-1-698 | NW_001810287.1 | + | 100824  | 100879  |
| Aae-1-699 | NW_001810288.1 | - | 77581   | 77526   |
| Aae-1-700 | NW_001810296.1 | + | 846661  | 846716  |
| Aae-1-701 | NW_001810298.1 | + | 82836   | 82891   |
| Aae-1-702 | NW_001810299.1 | - | 22191   | 22136   |
| Aae-1-703 | NW_001810307.1 | - | 582608  | 582553  |
| Aae-1-704 | NW_001810307.1 | - | 197807  | 197752  |
| Aae-1-705 | NW_001810310.1 | + | 53422   | 53477   |
| Aae-1-706 | NW_001810318.1 | - | 1550330 | 1550275 |
| Aae-1-707 | NW_001810318.1 | - | 411067  | 411012  |
| Aae-1-708 | NW_001810328.1 | - | 902201  | 902146  |
| Aae-1-709 | NW_001810328.1 | - | 371912  | 371857  |
| Aae-1-710 | NW_001810339.1 | - | 1708810 | 1708755 |

|           |                |   |         |         |
|-----------|----------------|---|---------|---------|
| Aae-1-711 | NW_001810350.1 | + | 556700  | 556755  |
| Aae-1-712 | NW_001810350.1 | + | 559397  | 559452  |
| Aae-1-713 | NW_001810350.1 | + | 758308  | 758363  |
| Aae-1-714 | NW_001810350.1 | + | 1656978 | 1657033 |
| Aae-1-715 | NW_001810350.1 | - | 3194480 | 3194425 |
| Aae-1-716 | NW_001810350.1 | - | 2763797 | 2763742 |
| Aae-1-717 | NW_001810350.1 | - | 555487  | 555432  |
| Aae-1-718 | NW_001810351.1 | - | 351     | 296     |
| Aae-1-719 | NW_001810361.1 | + | 988820  | 988875  |
| Aae-1-720 | NW_001810361.1 | - | 1985898 | 1985843 |
| Aae-1-721 | NW_001810361.1 | - | 986644  | 986589  |
| Aae-1-722 | NW_001810371.1 | + | 853522  | 853577  |
| Aae-1-723 | NW_001810371.1 | + | 1554104 | 1554159 |
| Aae-1-724 | NW_001810371.1 | - | 842581  | 842526  |
| Aae-1-725 | NW_001810371.1 | - | 551800  | 551745  |
| Aae-1-726 | NW_001810371.1 | - | 84510   | 84455   |
| Aae-1-727 | NW_001810381.1 | + | 898460  | 898515  |
| Aae-1-728 | NW_001810381.1 | + | 1763792 | 1763847 |
| Aae-1-729 | NW_001810381.1 | - | 1843872 | 1843817 |
| Aae-1-730 | NW_001810381.1 | - | 1532404 | 1532349 |
| Aae-1-731 | NW_001810392.1 | - | 1545120 | 1545065 |
| Aae-1-732 | NW_001810403.1 | - | 1644421 | 1644366 |
| Aae-1-733 | NW_001810403.1 | - | 912629  | 912574  |
| Aae-1-734 | NW_001810408.1 | - | 32849   | 32794   |
| Aae-1-735 | NW_001810414.1 | + | 328998  | 329053  |
| Aae-1-736 | NW_001810414.1 | + | 930442  | 930497  |
| Aae-1-737 | NW_001810414.1 | + | 1676171 | 1676226 |
| Aae-1-738 | NW_001810414.1 | - | 1674903 | 1674848 |
| Aae-1-739 | NW_001810414.1 | - | 1052887 | 1052832 |
| Aae-1-740 | NW_001810414.1 | - | 669608  | 669553  |
| Aae-1-741 | NW_001810425.1 | + | 376317  | 376372  |
| Aae-1-742 | NW_001810425.1 | + | 542865  | 542920  |
| Aae-1-743 | NW_001810425.1 | + | 1154410 | 1154465 |
| Aae-1-744 | NW_001810425.1 | + | 1911441 | 1911496 |
| Aae-1-745 | NW_001810436.1 | + | 885267  | 885322  |
| Aae-1-746 | NW_001810436.1 | + | 887977  | 888032  |
| Aae-1-747 | NW_001810447.1 | + | 45465   | 45520   |
| Aae-1-748 | NW_001810447.1 | + | 1013760 | 1013815 |
| Aae-1-749 | NW_001810447.1 | + | 1016457 | 1016512 |
| Aae-1-750 | NW_001810447.1 | + | 1445894 | 1445949 |
| Aae-1-751 | NW_001810447.1 | - | 1010527 | 1010472 |
| Aae-1-752 | NW_001810447.1 | - | 1007829 | 1007774 |
| Aae-1-753 | NW_001810447.1 | - | 587764  | 587709  |
| Aae-1-754 | NW_001810458.1 | + | 3261005 | 3261060 |
| Aae-1-755 | NW_001810458.1 | + | 3501354 | 3501409 |
| Aae-1-756 | NW_001810458.1 | - | 314748  | 314693  |
| Aae-1-757 | NW_001810459.1 | + | 340318  | 340373  |
| Aae-1-758 | NW_001810459.1 | + | 1385245 | 1385300 |
| Aae-1-759 | NW_001810459.1 | - | 1637955 | 1637900 |
| Aae-1-760 | NW_001810469.1 | + | 1232489 | 1232544 |
| Aae-1-761 | NW_001810469.1 | - | 1030105 | 1030050 |
| Aae-1-762 | NW_001810475.1 | - | 11898   | 11843   |



|           |                |   |         |         |
|-----------|----------------|---|---------|---------|
| Aae-1-763 | NW_001810483.1 | - | 27462   | 27407   |
| Aae-1-764 | NW_001810490.1 | - | 1987256 | 1987201 |
| Aae-1-765 | NW_001810493.1 | - | 20671   | 20616   |
| Aae-1-766 | NW_001810508.1 | + | 1295551 | 1295606 |
| Aae-1-767 | NW_001810508.1 | - | 695694  | 695639  |
| Aae-1-768 | NW_001810519.1 | + | 1300407 | 1300462 |
| Aae-1-769 | NW_001810519.1 | - | 233582  | 233527  |
| Aae-1-770 | NW_001810526.1 | - | 82128   | 82073   |
| Aae-1-771 | NW_001810537.1 | + | 1077575 | 1077630 |
| Aae-1-772 | NW_001810537.1 | + | 1454604 | 1454659 |
| Aae-1-773 | NW_001810537.1 | + | 1482946 | 1483001 |
| Aae-1-774 | NW_001810537.1 | - | 1644801 | 1644746 |
| Aae-1-775 | NW_001810555.1 | + | 745408  | 745463  |
| Aae-1-776 | NW_001810555.1 | + | 2663452 | 2663507 |
| Aae-1-777 | NW_001810555.1 | + | 2666150 | 2666205 |
| Aae-1-778 | NW_001810555.1 | + | 3191713 | 3191768 |
| Aae-1-779 | NW_001810555.1 | + | 3625107 | 3625162 |
| Aae-1-780 | NW_001810555.1 | + | 3629395 | 3629450 |
| Aae-1-781 | NW_001810555.1 | - | 3010675 | 3010620 |
| Aae-1-782 | NW_001810555.1 | - | 2638182 | 2638127 |
| Aae-1-783 | NW_001810555.1 | - | 2349410 | 2349355 |
| Aae-1-784 | NW_001810556.1 | - | 430604  | 430549  |
| Aae-1-785 | NW_001810556.1 | - | 349735  | 349680  |
| Aae-1-786 | NW_001810556.1 | - | 145400  | 145345  |
| Aae-1-787 | NW_001810558.1 | + | 61      | 116     |
| Aae-1-788 | NW_001810565.1 | - | 138510  | 138455  |
| Aae-1-789 | NW_001810575.1 | + | 799550  | 799605  |
| Aae-1-790 | NW_001810575.1 | + | 1768865 | 1768920 |
| Aae-1-791 | NW_001810575.1 | - | 1861632 | 1861577 |
| Aae-1-792 | NW_001810575.1 | - | 1429659 | 1429604 |
| Aae-1-793 | NW_001810575.1 | - | 575288  | 575233  |
| Aae-1-794 | NW_001810584.1 | + | 620620  | 620675  |
| Aae-1-795 | NW_001810584.1 | + | 1920390 | 1920445 |
| Aae-1-796 | NW_001810592.1 | - | 810909  | 810854  |
| Aae-1-797 | NW_001810592.1 | - | 23022   | 22967   |
| Aae-1-798 | NW_001810593.1 | - | 612     | 557     |
| Aae-1-799 | NW_001810599.1 | - | 1517722 | 1517667 |
| Aae-1-800 | NW_001810607.1 | - | 375621  | 375566  |
| Aae-1-801 | NW_001810616.1 | - | 514323  | 514268  |
| Aae-1-802 | NW_001810616.1 | - | 150903  | 150848  |
| Aae-1-803 | NW_001810623.1 | + | 1036463 | 1036518 |
| Aae-1-804 | NW_001810623.1 | + | 1044350 | 1044405 |
| Aae-1-805 | NW_001810623.1 | + | 1059054 | 1059109 |
| Aae-1-806 | NW_001810623.1 | + | 1082779 | 1082834 |
| Aae-1-807 | NW_001810623.1 | + | 1099923 | 1099978 |
| Aae-1-808 | NW_001810629.1 | + | 896164  | 896219  |
| Aae-1-809 | NW_001810637.1 | + | 2891782 | 2891837 |
| Aae-1-810 | NW_001810637.1 | - | 2670960 | 2670905 |
| Aae-1-811 | NW_001810637.1 | - | 2471579 | 2471524 |
| Aae-1-812 | NW_001810648.1 | + | 917013  | 917068  |
| Aae-1-813 | NW_001810648.1 | + | 1097056 | 1097111 |
| Aae-1-814 | NW_001810648.1 | - | 1722107 | 1722052 |

|           |                |   |         |         |
|-----------|----------------|---|---------|---------|
| Aae-1-815 | NW_001810656.1 | + | 1521014 | 1521069 |
| Aae-1-816 | NW_001810666.1 | + | 1463984 | 1464039 |
| Aae-1-817 | NW_001810666.1 | + | 1807904 | 1807959 |
| Aae-1-818 | NW_001810666.1 | - | 1660415 | 1660360 |
| Aae-1-819 | NW_001810666.1 | - | 1335246 | 1335191 |
| Aae-1-820 | NW_001810666.1 | - | 1329509 | 1329454 |
| Aae-1-821 | NW_001810666.1 | - | 856547  | 856492  |
| Aae-1-822 | NW_001810675.1 | + | 1178466 | 1178521 |
| Aae-1-823 | NW_001810681.1 | + | 1321843 | 1321898 |
| Aae-1-824 | NW_001810681.1 | - | 818184  | 818129  |
| Aae-1-825 | NW_001810688.1 | + | 1238654 | 1238709 |
| Aae-1-826 | NW_001810688.1 | - | 387906  | 387851  |
| Aae-1-827 | NW_001810696.1 | + | 940280  | 940335  |
| Aae-1-828 | NW_001810702.1 | - | 517049  | 516994  |
| Aae-1-829 | NW_001810708.1 | + | 1046253 | 1046308 |
| Aae-1-830 | NW_001810714.1 | + | 1048101 | 1048156 |
| Aae-1-831 | NW_001810714.1 | + | 1260351 | 1260406 |
| Aae-1-832 | NW_001810714.1 | + | 1672978 | 1673033 |
| Aae-1-833 | NW_001810714.1 | + | 2768294 | 2768349 |
| Aae-1-834 | NW_001810714.1 | + | 2892043 | 2892098 |
| Aae-1-835 | NW_001810714.1 | + | 3283798 | 3283853 |
| Aae-1-836 | NW_001810714.1 | + | 3943693 | 3943748 |
| Aae-1-837 | NW_001810714.1 | - | 1672959 | 1672904 |
| Aae-1-838 | NW_001810715.1 | + | 93195   | 93250   |
| Aae-1-839 | NW_001810715.1 | + | 459541  | 459596  |
| Aae-1-840 | NW_001810715.1 | + | 919406  | 919461  |
| Aae-1-841 | NW_001810715.1 | - | 979416  | 979361  |
| Aae-1-842 | NW_001810721.1 | - | 1368497 | 1368442 |
| Aae-1-843 | NW_001810721.1 | - | 559978  | 559923  |
| Aae-1-844 | NW_001810736.1 | + | 1157924 | 1157979 |
| Aae-1-845 | NW_001810736.1 | - | 255316  | 255261  |
| Aae-1-846 | NW_001810744.1 | + | 1805957 | 1806012 |
| Aae-1-847 | NW_001810744.1 | - | 1481025 | 1480970 |
| Aae-1-848 | NW_001810750.1 | + | 200157  | 200212  |
| Aae-1-849 | NW_001810750.1 | + | 342270  | 342325  |
| Aae-1-850 | NW_001810750.1 | - | 347487  | 347432  |
| Aae-1-851 | NW_001810756.1 | - | 868350  | 868295  |
| Aae-1-852 | NW_001810756.1 | - | 341011  | 340956  |
| Aae-1-853 | NW_001810756.1 | - | 99349   | 99294   |
| Aae-1-854 | NW_001810763.1 | + | 71920   | 71975   |
| Aae-1-855 | NW_001810763.1 | + | 413682  | 413737  |
| Aae-1-856 | NW_001810763.1 | + | 824520  | 824575  |
| Aae-1-857 | NW_001810763.1 | + | 875237  | 875292  |
| Aae-1-858 | NW_001810769.1 | + | 1400005 | 1400060 |
| Aae-1-859 | NW_001810769.1 | - | 750193  | 750138  |
| Aae-1-860 | NW_001810778.1 | + | 1697455 | 1697510 |
| Aae-1-861 | NW_001810778.1 | - | 206579  | 206524  |
| Aae-1-862 | NW_001810782.1 | - | 963092  | 963037  |
| Aae-1-863 | NW_001810782.1 | - | 799970  | 799915  |
| Aae-1-864 | NW_001810783.1 | + | 628534  | 628589  |
| Aae-1-865 | NW_001810784.1 | + | 928075  | 928130  |
| Aae-1-866 | NW_001810784.1 | + | 1237532 | 1237587 |

|           |                |   |         |         |
|-----------|----------------|---|---------|---------|
| Aae-1-867 | NW_001810784.1 | - | 103414  | 103359  |
| Aae-1-868 | NW_001810787.1 | - | 6850    | 6795    |
| Aae-1-869 | NW_001810791.1 | + | 242779  | 242834  |
| Aae-1-870 | NW_001810791.1 | + | 1660639 | 1660694 |
| Aae-1-871 | NW_001810791.1 | - | 1610948 | 1610893 |
| Aae-1-872 | NW_001810791.1 | - | 1599223 | 1599168 |
| Aae-1-873 | NW_001810791.1 | - | 1171699 | 1171644 |
| Aae-1-874 | NW_001810791.1 | - | 667099  | 667044  |
| Aae-1-875 | NW_001810795.1 | - | 463102  | 463047  |
| Aae-1-876 | NW_001810800.1 | + | 1788764 | 1788819 |
| Aae-1-877 | NW_001810800.1 | - | 703548  | 703493  |
| Aae-1-878 | NW_001810813.1 | + | 532527  | 532582  |
| Aae-1-879 | NW_001810813.1 | - | 876444  | 876389  |
| Aae-1-880 | NW_001810813.1 | - | 504636  | 504581  |
| Aae-1-881 | NW_001810816.1 | + | 206967  | 207022  |
| Aae-1-882 | NW_001810816.1 | - | 176490  | 176435  |
| Aae-1-883 | NW_001810821.1 | + | 30055   | 30110   |
| Aae-1-884 | NW_001810825.1 | - | 1255633 | 1255578 |
| Aae-1-885 | NW_001810830.1 | + | 647769  | 647824  |
| Aae-1-886 | NW_001810830.1 | + | 1117648 | 1117703 |
| Aae-1-887 | NW_001810830.1 | - | 1276018 | 1275963 |
| Aae-1-888 | NW_001810830.1 | - | 1056969 | 1056914 |
| Aae-1-889 | NW_001810830.1 | - | 829299  | 829244  |
| Aae-1-890 | NW_001810830.1 | - | 408110  | 408055  |
| Aae-1-891 | NW_001810837.1 | + | 3330944 | 3330999 |
| Aae-1-892 | NW_001810837.1 | + | 3900684 | 3900739 |
| Aae-1-893 | NW_001810844.1 | - | 475469  | 475414  |
| Aae-1-894 | NW_001810852.1 | + | 15236   | 15291   |
| Aae-1-895 | NW_001810852.1 | + | 183099  | 183154  |
| Aae-1-896 | NW_001810852.1 | + | 359980  | 360035  |
| Aae-1-897 | NW_001810852.1 | + | 1527242 | 1527297 |
| Aae-1-898 | NW_001810852.1 | - | 1657919 | 1657864 |
| Aae-1-899 | NW_001810852.1 | - | 952509  | 952454  |
| Aae-1-900 | NW_001810852.1 | - | 608498  | 608443  |
| Aae-1-901 | NW_001810852.1 | - | 10359   | 10304   |
| Aae-1-902 | NW_001810852.1 | - | 499     | 444     |
| Aae-1-903 | NW_001810857.1 | - | 35908   | 35853   |
| Aae-1-904 | NW_001810858.1 | - | 1761688 | 1761633 |
| Aae-1-905 | NW_001810868.1 | + | 1377243 | 1377298 |
| Aae-1-906 | NW_001810868.1 | - | 1736295 | 1736240 |
| Aae-1-907 | NW_001810868.1 | - | 149661  | 149606  |
| Aae-1-908 | NW_001810876.1 | + | 233019  | 233074  |
| Aae-1-909 | NW_001810876.1 | + | 465026  | 465081  |
| Aae-1-910 | NW_001810876.1 | + | 1003576 | 1003631 |
| Aae-1-911 | NW_001810876.1 | + | 1699965 | 1700020 |
| Aae-1-912 | NW_001810876.1 | - | 355979  | 355924  |
| Aae-1-913 | NW_001810876.1 | - | 231617  | 231562  |
| Aae-1-914 | NW_001810880.1 | - | 1590918 | 1590863 |
| Aae-1-915 | NW_001810881.1 | + | 1372838 | 1372893 |
| Aae-1-916 | NW_001810881.1 | - | 372090  | 372035  |
| Aae-1-917 | NW_001810884.1 | + | 728001  | 728056  |
| Aae-1-918 | NW_001810891.1 | + | 224704  | 224759  |

|           |                |   |         |         |
|-----------|----------------|---|---------|---------|
| Aae-1-919 | NW_001810891.1 | - | 1072512 | 1072457 |
| Aae-1-920 | NW_001810895.1 | + | 689957  | 690012  |
| Aae-1-921 | NW_001810895.1 | + | 1046015 | 1046070 |
| Aae-1-922 | NW_001810895.1 | + | 1048713 | 1048768 |
| Aae-1-923 | NW_001810895.1 | - | 807051  | 806996  |
| Aae-1-924 | NW_001810901.1 | + | 306426  | 306481  |
| Aae-1-925 | NW_001810901.1 | - | 1194701 | 1194646 |
| Aae-1-926 | NW_001810901.1 | - | 773749  | 773694  |
| Aae-1-927 | NW_001810901.1 | - | 470676  | 470621  |
| Aae-1-928 | NW_001810904.1 | + | 13258   | 13313   |
| Aae-1-929 | NW_001810905.1 | + | 87126   | 87181   |
| Aae-1-930 | NW_001810905.1 | - | 1589882 | 1589827 |
| Aae-1-931 | NW_001810905.1 | - | 782724  | 782669  |
| Aae-1-932 | NW_001810905.1 | - | 443875  | 443820  |
| Aae-1-933 | NW_001810909.1 | + | 335073  | 335128  |
| Aae-1-934 | NW_001810912.1 | + | 1433536 | 1433591 |
| Aae-1-935 | NW_001810912.1 | + | 1436231 | 1436286 |
| Aae-1-936 | NW_001810912.1 | + | 1438928 | 1438983 |
| Aae-1-937 | NW_001810912.1 | + | 1719984 | 1720039 |
| Aae-1-938 | NW_001810912.1 | + | 3628949 | 3629004 |
| Aae-1-939 | NW_001810912.1 | - | 2037479 | 2037424 |
| Aae-1-940 | NW_001810912.1 | - | 1431910 | 1431855 |
| Aae-1-941 | NW_001810912.1 | - | 1386281 | 1386226 |
| Aae-1-942 | NW_001810913.1 | + | 897214  | 897269  |
| Aae-1-943 | NW_001810913.1 | - | 879407  | 879352  |
| Aae-1-944 | NW_001810916.1 | - | 225524  | 225469  |
| Aae-1-945 | NW_001810919.1 | + | 485522  | 485577  |
| Aae-1-946 | NW_001810919.1 | - | 364413  | 364358  |
| Aae-1-947 | NW_001810920.1 | + | 855310  | 855365  |
| Aae-1-948 | NW_001810920.1 | - | 1715071 | 1715016 |
| Aae-1-949 | NW_001810923.1 | + | 1621422 | 1621477 |
| Aae-1-950 | NW_001810929.1 | + | 1432891 | 1432946 |
| Aae-1-951 | NW_001810929.1 | - | 826326  | 826271  |
| Aae-1-952 | NW_001810937.1 | + | 1035194 | 1035249 |
| Aae-1-953 | NW_001810937.1 | + | 2318162 | 2318217 |
| Aae-1-954 | NW_001810938.1 | + | 559100  | 559155  |
| Aae-1-955 | NW_001810938.1 | + | 1332925 | 1332980 |
| Aae-1-956 | NW_001810938.1 | - | 1530039 | 1529984 |
| Aae-1-957 | NW_001810938.1 | - | 1331000 | 1330945 |
| Aae-1-958 | NW_001810939.1 | + | 517213  | 517268  |
| Aae-1-959 | NW_001810939.1 | - | 1444829 | 1444774 |
| Aae-1-960 | NW_001810944.1 | + | 619916  | 619971  |
| Aae-1-961 | NW_001810944.1 | + | 952470  | 952525  |
| Aae-1-962 | NW_001810944.1 | - | 342518  | 342463  |
| Aae-1-963 | NW_001810944.1 | - | 313736  | 313681  |
| Aae-1-964 | NW_001810945.1 | + | 903023  | 903078  |
| Aae-1-965 | NW_001810945.1 | + | 1310631 | 1310686 |
| Aae-1-966 | NW_001810945.1 | - | 684478  | 684423  |
| Aae-1-967 | NW_001810945.1 | - | 278695  | 278640  |
| Aae-1-968 | NW_001810952.1 | + | 519409  | 519464  |
| Aae-1-969 | NW_001810953.1 | + | 414661  | 414716  |
| Aae-1-970 | NW_001810955.1 | + | 438014  | 438069  |

|            |                |   |         |         |
|------------|----------------|---|---------|---------|
| Aae-1-971  | NW_001810955.1 | + | 706815  | 706870  |
| Aae-1-972  | NW_001810955.1 | + | 1381035 | 1381090 |
| Aae-1-973  | NW_001810955.1 | + | 1417856 | 1417911 |
| Aae-1-974  | NW_001810955.1 | + | 3271691 | 3271746 |
| Aae-1-975  | NW_001810955.1 | + | 3726454 | 3726509 |
| Aae-1-976  | NW_001810955.1 | - | 3738193 | 3738138 |
| Aae-1-977  | NW_001810955.1 | - | 2414182 | 2414127 |
| Aae-1-978  | NW_001810955.1 | - | 2112262 | 2112207 |
| Aae-1-979  | NW_001810955.1 | - | 1414626 | 1414571 |
| Aae-1-980  | NW_001810956.1 | + | 1092969 | 1093024 |
| Aae-1-981  | NW_001810956.1 | - | 1584101 | 1584046 |
| Aae-1-982  | NW_001810958.1 | + | 855248  | 855303  |
| Aae-1-983  | NW_001810959.1 | + | 415531  | 415586  |
| Aae-1-984  | NW_001810960.1 | + | 573565  | 573620  |
| Aae-1-985  | NW_001810960.1 | - | 1156244 | 1156189 |
| Aae-1-986  | NW_001810960.1 | - | 1152927 | 1152872 |
| Aae-1-987  | NW_001810962.1 | + | 260146  | 260201  |
| Aae-1-988  | NW_001810963.1 | + | 1058838 | 1058893 |
| Aae-1-989  | NW_001810963.1 | - | 986042  | 985987  |
| Aae-1-990  | NW_001810964.1 | + | 849329  | 849384  |
| Aae-1-991  | NW_001810964.1 | - | 1410653 | 1410598 |
| Aae-1-992  | NW_001810964.1 | - | 413689  | 413634  |
| Aae-1-993  | NW_001810966.1 | - | 631187  | 631132  |
| Aae-1-994  | NW_001810967.1 | + | 666022  | 666077  |
| Aae-1-995  | NW_001810967.1 | + | 876311  | 876366  |
| Aae-1-996  | NW_001810970.1 | + | 726910  | 726965  |
| Aae-1-997  | NW_001810970.1 | + | 3407437 | 3407492 |
| Aae-1-998  | NW_001810970.1 | + | 3675619 | 3675674 |
| Aae-1-999  | NW_001810972.1 | + | 597407  | 597462  |
| Aae-1-1000 | NW_001810975.1 | - | 883258  | 883203  |
| Aae-1-1001 | NW_001810977.1 | + | 903758  | 903813  |
| Aae-1-1002 | NW_001810977.1 | + | 1533627 | 1533682 |
| Aae-1-1003 | NW_001810979.1 | - | 1481761 | 1481706 |
| Aae-1-1004 | NW_001810979.1 | - | 1328855 | 1328800 |
| Aae-1-1005 | NW_001810981.1 | + | 377239  | 377294  |
| Aae-1-1006 | NW_001810981.1 | + | 481930  | 481985  |
| Aae-1-1007 | NW_001810981.1 | + | 670379  | 670434  |
| Aae-1-1008 | NW_001810981.1 | + | 937263  | 937318  |
| Aae-1-1009 | NW_001810982.1 | + | 585060  | 585115  |
| Aae-1-1010 | NW_001810984.1 | + | 1723274 | 1723329 |
| Aae-1-1011 | NW_001810984.1 | + | 2727340 | 2727395 |
| Aae-1-1012 | NW_001810984.1 | - | 1125962 | 1125907 |
| Aae-1-1013 | NW_001810985.1 | + | 990804  | 990859  |
| Aae-1-1014 | NW_001810986.1 | + | 994812  | 994867  |
| Aae-1-1015 | NW_001810986.1 | - | 1094582 | 1094527 |
| Aae-1-1016 | NW_001810986.1 | - | 992198  | 992143  |
| Aae-1-1017 | NW_001810988.1 | + | 1226889 | 1226944 |
| Aae-1-1018 | NW_001810990.1 | + | 694052  | 694107  |
| Aae-1-1019 | NW_001810990.1 | - | 1057393 | 1057338 |
| Aae-1-1020 | NW_001810990.1 | - | 287169  | 287114  |
| Aae-1-1021 | NW_001810991.1 | + | 950808  | 950863  |
| Aae-1-1022 | NW_001810991.1 | - | 274031  | 273976  |

|            |                |   |         |         |
|------------|----------------|---|---------|---------|
| Aae-1-1023 | NW_001810993.1 | - | 991966  | 991911  |
| Aae-1-1024 | NW_001810993.1 | - | 871145  | 871090  |
| Aae-1-1025 | NW_001810994.1 | - | 1174703 | 1174648 |
| Aae-1-1026 | NW_001810994.1 | - | 659887  | 659832  |
| Aae-1-1027 | NW_001810994.1 | - | 467024  | 466969  |
| Aae-1-1028 | NW_001810995.1 | + | 1154550 | 1154605 |
| Aae-1-1029 | NW_001810996.1 | + | 2363818 | 2363873 |
| Aae-1-1030 | NW_001810996.1 | - | 1918385 | 1918330 |
| Aae-1-1031 | NW_001810996.1 | - | 1393362 | 1393307 |
| Aae-1-1032 | NW_001810996.1 | - | 99018   | 98963   |
| Aae-1-1033 | NW_001810997.1 | + | 129121  | 129176  |
| Aae-1-1034 | NW_001810997.1 | + | 890766  | 890821  |
| Aae-1-1035 | NW_001810997.1 | - | 1489167 | 1489112 |
| Aae-1-1036 | NW_001810999.1 | + | 128449  | 128504  |
| Aae-1-1037 | NW_001810999.1 | + | 640603  | 640658  |
| Aae-1-1038 | NW_001810999.1 | - | 1197248 | 1197193 |
| Aae-1-1039 | NW_001810999.1 | - | 126769  | 126714  |
| Aae-1-1040 | NW_001811000.1 | - | 645801  | 645746  |
| Aae-1-1041 | NW_001811001.1 | + | 81515   | 81570   |
| Aae-1-1042 | NW_001811001.1 | - | 413212  | 413157  |
| Aae-1-1043 | NW_001811002.1 | - | 1186948 | 1186893 |
| Aae-1-1044 | NW_001811003.1 | - | 1394726 | 1394671 |
| Aae-1-1045 | NW_001811003.1 | - | 621252  | 621197  |
| Aae-1-1046 | NW_001811004.1 | + | 52862   | 52917   |
| Aae-1-1047 | NW_001811004.1 | + | 1000089 | 1000144 |
| Aae-1-1048 | NW_001811004.1 | + | 1006340 | 1006395 |
| Aae-1-1049 | NW_001811004.1 | + | 1140805 | 1140860 |
| Aae-1-1050 | NW_001811004.1 | - | 355513  | 355458  |
| Aae-1-1051 | NW_001811005.1 | + | 134285  | 134340  |
| Aae-1-1052 | NW_001811005.1 | - | 1179589 | 1179534 |
| Aae-1-1053 | NW_001811006.1 | + | 1316871 | 1316926 |
| Aae-1-1054 | NW_001811006.1 | - | 690136  | 690081  |
| Aae-1-1055 | NW_001811006.1 | - | 569408  | 569353  |
| Aae-1-1056 | NW_001811006.1 | - | 10404   | 10349   |
| Aae-1-1057 | NW_001811007.1 | + | 2061621 | 2061676 |
| Aae-1-1058 | NW_001811007.1 | + | 3044252 | 3044307 |
| Aae-1-1059 | NW_001811007.1 | + | 3126313 | 3126368 |
| Aae-1-1060 | NW_001811007.1 | + | 3454192 | 3454247 |
| Aae-1-1061 | NW_001811007.1 | - | 3229023 | 3228968 |
| Aae-1-1062 | NW_001811007.1 | - | 3126273 | 3126218 |
| Aae-1-1063 | NW_001811008.1 | + | 23075   | 23130   |
| Aae-1-1064 | NW_001811008.1 | - | 1157698 | 1157643 |
| Aae-1-1065 | NW_001811009.1 | + | 760155  | 760210  |
| Aae-1-1066 | NW_001811009.1 | - | 29060   | 29005   |
| Aae-1-1067 | NW_001811010.1 | - | 515239  | 515184  |
| Aae-1-1068 | NW_001811012.1 | + | 581055  | 581110  |
| Aae-1-1069 | NW_001811013.1 | + | 1004711 | 1004766 |
| Aae-1-1070 | NW_001811015.1 | + | 1218944 | 1218999 |
| Aae-1-1071 | NW_001811016.1 | - | 204242  | 204187  |
| Aae-1-1072 | NW_001811017.1 | + | 100721  | 100776  |
| Aae-1-1073 | NW_001811018.1 | + | 3097546 | 3097601 |
| Aae-1-1074 | NW_001811018.1 | + | 3869614 | 3869669 |

|            |                |   |         |         |
|------------|----------------|---|---------|---------|
| Aae-1-1075 | NW_001811019.1 | + | 2028300 | 2028355 |
| Aae-1-1076 | NW_001811019.1 | - | 2999100 | 2999045 |
| Aae-1-1077 | NW_001811019.1 | - | 2778947 | 2778892 |
| Aae-1-1078 | NW_001811020.1 | + | 558139  | 558194  |
| Aae-1-1079 | NW_001811020.1 | - | 557323  | 557268  |
| Aae-1-1080 | NW_001811021.1 | + | 1326751 | 1326806 |
| Aae-1-1081 | NW_001811021.1 | - | 1070326 | 1070271 |
| Aae-1-1082 | NW_001811022.1 | + | 957534  | 957589  |
| Aae-1-1083 | NW_001811022.1 | + | 1014944 | 1014999 |
| Aae-1-1084 | NW_001811022.1 | - | 632806  | 632751  |
| Aae-1-1085 | NW_001811024.1 | - | 854270  | 854215  |
| Aae-1-1086 | NW_001811025.1 | + | 158908  | 158963  |
| Aae-1-1087 | NW_001811026.1 | + | 292473  | 292528  |
| Aae-1-1088 | NW_001811026.1 | - | 831171  | 831116  |
| Aae-1-1089 | NW_001811026.1 | - | 173078  | 173023  |
| Aae-1-1090 | NW_001811027.1 | + | 617253  | 617308  |
| Aae-1-1091 | NW_001811027.1 | + | 1051549 | 1051604 |
| Aae-1-1092 | NW_001811029.1 | + | 228176  | 228231  |
| Aae-1-1093 | NW_001811029.1 | + | 724900  | 724955  |
| Aae-1-1094 | NW_001811029.1 | - | 861388  | 861333  |
| Aae-1-1095 | NW_001811029.1 | - | 825848  | 825793  |
| Aae-1-1096 | NW_001811030.1 | + | 1974029 | 1974084 |
| Aae-1-1097 | NW_001811030.1 | + | 2000867 | 2000922 |
| Aae-1-1098 | NW_001811030.1 | - | 3080948 | 3080893 |
| Aae-1-1099 | NW_001811030.1 | - | 1816013 | 1815958 |
| Aae-1-1100 | NW_001811031.1 | + | 709744  | 709799  |
| Aae-1-1101 | NW_001811031.1 | + | 1092450 | 1092505 |
| Aae-1-1102 | NW_001811031.1 | - | 280743  | 280688  |
| Aae-1-1103 | NW_001811032.1 | + | 133538  | 133593  |
| Aae-1-1104 | NW_001811032.1 | - | 130661  | 130606  |
| Aae-1-1105 | NW_001811036.1 | + | 11      | 66      |
| Aae-1-1106 | NW_001811036.1 | + | 732585  | 732640  |
| Aae-1-1107 | NW_001811036.1 | - | 61862   | 61807   |
| Aae-1-1108 | NW_001811038.1 | + | 407493  | 407548  |
| Aae-1-1109 | NW_001811038.1 | - | 404345  | 404290  |
| Aae-1-1110 | NW_001811040.1 | + | 1065605 | 1065660 |
| Aae-1-1111 | NW_001811040.1 | - | 761116  | 761061  |
| Aae-1-1112 | NW_001811041.1 | + | 1611004 | 1611059 |
| Aae-1-1113 | NW_001811041.1 | + | 2539589 | 2539644 |
| Aae-1-1114 | NW_001811041.1 | - | 165635  | 165580  |
| Aae-1-1115 | NW_001811042.1 | - | 833886  | 833831  |
| Aae-1-1116 | NW_001811043.1 | + | 769555  | 769610  |
| Aae-1-1117 | NW_001811043.1 | - | 1052247 | 1052192 |
| Aae-1-1118 | NW_001811043.1 | - | 182177  | 182122  |
| Aae-1-1119 | NW_001811044.1 | - | 1148917 | 1148862 |
| Aae-1-1120 | NW_001811045.1 | - | 377668  | 377613  |
| Aae-1-1121 | NW_001811046.1 | + | 1081314 | 1081369 |
| Aae-1-1122 | NW_001811047.1 | - | 1028821 | 1028766 |
| Aae-1-1123 | NW_001811048.1 | - | 172943  | 172888  |
| Aae-1-1124 | NW_001811049.1 | + | 934979  | 935034  |
| Aae-1-1125 | NW_001811049.1 | - | 930966  | 930911  |
| Aae-1-1126 | NW_001811050.1 | + | 198839  | 198894  |

|            |                |   |         |         |
|------------|----------------|---|---------|---------|
| Aae-1-1127 | NW_001811050.1 | - | 197359  | 197304  |
| Aae-1-1128 | NW_001811052.1 | + | 3394557 | 3394612 |
| Aae-1-1129 | NW_001811052.1 | - | 1604978 | 1604923 |
| Aae-1-1130 | NW_001811053.1 | - | 994194  | 994139  |
| Aae-1-1131 | NW_001811054.1 | + | 592952  | 593007  |
| Aae-1-1132 | NW_001811055.1 | + | 1248758 | 1248813 |
| Aae-1-1133 | NW_001811055.1 | - | 1247658 | 1247603 |
| Aae-1-1134 | NW_001811056.1 | + | 703338  | 703393  |
| Aae-1-1135 | NW_001811056.1 | + | 706025  | 706080  |
| Aae-1-1136 | NW_001811056.1 | - | 702964  | 702909  |
| Aae-1-1137 | NW_001811057.1 | + | 704415  | 704470  |
| Aae-1-1138 | NW_001811058.1 | + | 993372  | 993427  |
| Aae-1-1139 | NW_001811062.1 | + | 967522  | 967577  |
| Aae-1-1140 | NW_001811063.1 | + | 458235  | 458290  |
| Aae-1-1141 | NW_001811063.1 | + | 1605062 | 1605117 |
| Aae-1-1142 | NW_001811063.1 | - | 2982437 | 2982382 |
| Aae-1-1143 | NW_001811063.1 | - | 454482  | 454427  |
| Aae-1-1144 | NW_001811065.1 | + | 798276  | 798331  |
| Aae-1-1145 | NW_001811065.1 | - | 698994  | 698939  |
| Aae-1-1146 | NW_001811066.1 | - | 1295978 | 1295923 |
| Aae-1-1147 | NW_001811067.1 | - | 1197294 | 1197239 |
| Aae-1-1148 | NW_001811068.1 | + | 399651  | 399706  |
| Aae-1-1149 | NW_001811068.1 | - | 815933  | 815878  |
| Aae-1-1150 | NW_001811068.1 | - | 6584    | 6529    |
| Aae-1-1151 | NW_001811069.1 | + | 989783  | 989838  |
| Aae-1-1152 | NW_001811069.1 | + | 1146459 | 1146514 |
| Aae-1-1153 | NW_001811071.1 | - | 880647  | 880592  |
| Aae-1-1154 | NW_001811072.1 | + | 418388  | 418443  |
| Aae-1-1155 | NW_001811072.1 | + | 563432  | 563487  |
| Aae-1-1156 | NW_001811074.1 | + | 2714862 | 2714917 |
| Aae-1-1157 | NW_001811074.1 | - | 3217908 | 3217853 |
| Aae-1-1158 | NW_001811076.1 | + | 47533   | 47588   |
| Aae-1-1159 | NW_001811076.1 | + | 464734  | 464789  |
| Aae-1-1160 | NW_001811076.1 | - | 1135827 | 1135772 |
| Aae-1-1161 | NW_001811076.1 | - | 806869  | 806814  |
| Aae-1-1162 | NW_001811077.1 | + | 262618  | 262673  |
| Aae-1-1163 | NW_001811077.1 | - | 461993  | 461938  |
| Aae-1-1164 | NW_001811078.1 | - | 248654  | 248599  |
| Aae-1-1165 | NW_001811079.1 | - | 605253  | 605198  |
| Aae-1-1166 | NW_001811079.1 | - | 308851  | 308796  |
| Aae-1-1167 | NW_001811082.1 | + | 1190141 | 1190196 |
| Aae-1-1168 | NW_001811083.1 | - | 622509  | 622454  |
| Aae-1-1169 | NW_001811085.1 | + | 1744589 | 1744644 |
| Aae-1-1170 | NW_001811085.1 | - | 2979851 | 2979796 |
| Aae-1-1171 | NW_001811085.1 | - | 1209273 | 1209218 |
| Aae-1-1172 | NW_001811089.1 | - | 525290  | 525235  |
| Aae-1-1173 | NW_001811090.1 | + | 22126   | 22181   |
| Aae-1-1174 | NW_001811091.1 | - | 1161169 | 1161114 |
| Aae-1-1175 | NW_001811091.1 | - | 664604  | 664549  |
| Aae-1-1176 | NW_001811093.1 | + | 94469   | 94524   |
| Aae-1-1177 | NW_001811094.1 | + | 991328  | 991383  |
| Aae-1-1178 | NW_001811094.1 | - | 797356  | 797301  |



|            |                |   |         |         |
|------------|----------------|---|---------|---------|
| Aae-1-1179 | NW_001811095.1 | + | 957912  | 957967  |
| Aae-1-1180 | NW_001811096.1 | + | 946038  | 946093  |
| Aae-1-1181 | NW_001811096.1 | - | 1590825 | 1590770 |
| Aae-1-1182 | NW_001811096.1 | - | 766466  | 766411  |
| Aae-1-1183 | NW_001811097.1 | + | 44980   | 45035   |
| Aae-1-1184 | NW_001811097.1 | + | 590632  | 590687  |
| Aae-1-1185 | NW_001811098.1 | - | 551414  | 551359  |
| Aae-1-1186 | NW_001811101.1 | - | 329023  | 328968  |
| Aae-1-1187 | NW_001811102.1 | - | 817555  | 817500  |
| Aae-1-1188 | NW_001811107.1 | + | 241995  | 242050  |
| Aae-1-1189 | NW_001811107.1 | + | 695032  | 695087  |
| Aae-1-1190 | NW_001811107.1 | + | 766080  | 766135  |
| Aae-1-1191 | NW_001811107.1 | + | 1319426 | 1319481 |
| Aae-1-1192 | NW_001811107.1 | + | 1572425 | 1572480 |
| Aae-1-1193 | NW_001811107.1 | + | 1747781 | 1747836 |
| Aae-1-1194 | NW_001811107.1 | - | 2494394 | 2494339 |
| Aae-1-1195 | NW_001811107.1 | - | 2093901 | 2093846 |
| Aae-1-1196 | NW_001811107.1 | - | 1571119 | 1571064 |
| Aae-1-1197 | NW_001811107.1 | - | 1171402 | 1171347 |
| Aae-1-1198 | NW_001811108.1 | + | 968004  | 968059  |
| Aae-1-1199 | NW_001811108.1 | - | 283195  | 283140  |
| Aae-1-1200 | NW_001811109.1 | - | 402882  | 402827  |
| Aae-1-1201 | NW_001811110.1 | + | 386200  | 386255  |
| Aae-1-1202 | NW_001811110.1 | + | 905166  | 905221  |
| Aae-1-1203 | NW_001811110.1 | + | 993593  | 993648  |
| Aae-1-1204 | NW_001811110.1 | - | 380702  | 380647  |
| Aae-1-1205 | NW_001811111.1 | + | 1182130 | 1182185 |
| Aae-1-1206 | NW_001811115.1 | - | 730453  | 730398  |
| Aae-1-1207 | NW_001811115.1 | - | 378536  | 378481  |
| Aae-1-1208 | NW_001811115.1 | - | 160613  | 160558  |
| Aae-1-1209 | NW_001811116.1 | + | 1020082 | 1020137 |
| Aae-1-1210 | NW_001811116.1 | - | 1104652 | 1104597 |
| Aae-1-1211 | NW_001811116.1 | - | 181388  | 181333  |
| Aae-1-1212 | NW_001811118.1 | + | 287887  | 287942  |
| Aae-1-1213 | NW_001811118.1 | + | 1668050 | 1668105 |
| Aae-1-1214 | NW_001811118.1 | + | 3101689 | 3101744 |
| Aae-1-1215 | NW_001811118.1 | - | 255990  | 255935  |
| Aae-1-1216 | NW_001811119.1 | + | 901962  | 902017  |
| Aae-1-1217 | NW_001811119.1 | + | 1022982 | 1023037 |
| Aae-1-1218 | NW_001811119.1 | - | 360748  | 360693  |
| Aae-1-1219 | NW_001811120.1 | + | 571678  | 571733  |
| Aae-1-1220 | NW_001811120.1 | - | 414452  | 414397  |
| Aae-1-1221 | NW_001811121.1 | - | 854341  | 854286  |
| Aae-1-1222 | NW_001811122.1 | + | 397662  | 397717  |
| Aae-1-1223 | NW_001811124.1 | - | 766457  | 766402  |
| Aae-1-1224 | NW_001811124.1 | - | 281798  | 281743  |
| Aae-1-1225 | NW_001811125.1 | + | 173586  | 173641  |
| Aae-1-1226 | NW_001811126.1 | + | 450113  | 450168  |
| Aae-1-1227 | NW_001811126.1 | + | 624843  | 624898  |
| Aae-1-1228 | NW_001811126.1 | - | 617765  | 617710  |
| Aae-1-1229 | NW_001811126.1 | - | 449777  | 449722  |
| Aae-1-1230 | NW_001811126.1 | - | 240751  | 240696  |

|            |                |   |         |         |
|------------|----------------|---|---------|---------|
| Aae-1-1231 | NW_001811128.1 | + | 146547  | 146602  |
| Aae-1-1232 | NW_001811129.1 | + | 1662264 | 1662319 |
| Aae-1-1233 | NW_001811129.1 | + | 1677784 | 1677839 |
| Aae-1-1234 | NW_001811129.1 | + | 4508883 | 4508938 |
| Aae-1-1235 | NW_001811129.1 | - | 3960901 | 3960846 |
| Aae-1-1236 | NW_001811129.1 | - | 3351022 | 3350967 |
| Aae-1-1237 | NW_001811129.1 | - | 2585093 | 2585038 |
| Aae-1-1238 | NW_001811130.1 | + | 141951  | 142006  |
| Aae-1-1239 | NW_001811130.1 | + | 1669538 | 1669593 |
| Aae-1-1240 | NW_001811130.1 | + | 2442111 | 2442166 |
| Aae-1-1241 | NW_001811130.1 | + | 3128509 | 3128564 |
| Aae-1-1242 | NW_001811130.1 | - | 2143751 | 2143696 |
| Aae-1-1243 | NW_001811130.1 | - | 1646702 | 1646647 |
| Aae-1-1244 | NW_001811131.1 | + | 695760  | 695815  |
| Aae-1-1245 | NW_001811133.1 | - | 525286  | 525231  |
| Aae-1-1246 | NW_001811134.1 | - | 570917  | 570862  |
| Aae-1-1247 | NW_001811138.1 | + | 225     | 280     |
| Aae-1-1248 | NW_001811139.1 | - | 152023  | 151968  |
| Aae-1-1249 | NW_001811141.1 | + | 1829772 | 1829827 |
| Aae-1-1250 | NW_001811141.1 | + | 2922794 | 2922849 |
| Aae-1-1251 | NW_001811141.1 | - | 2842721 | 2842666 |
| Aae-1-1252 | NW_001811141.1 | - | 1431423 | 1431368 |
| Aae-1-1253 | NW_001811143.1 | + | 247925  | 247980  |
| Aae-1-1254 | NW_001811143.1 | + | 844473  | 844528  |
| Aae-1-1255 | NW_001811144.1 | + | 965657  | 965712  |
| Aae-1-1256 | NW_001811145.1 | - | 1039009 | 1038954 |
| Aae-1-1257 | NW_001811146.1 | - | 635577  | 635522  |
| Aae-1-1258 | NW_001811147.1 | + | 713425  | 713480  |
| Aae-1-1259 | NW_001811147.1 | + | 824934  | 824989  |
| Aae-1-1260 | NW_001811149.1 | + | 832123  | 832178  |
| Aae-1-1261 | NW_001811149.1 | - | 164597  | 164542  |
| Aae-1-1262 | NW_001811151.1 | - | 188595  | 188540  |
| Aae-1-1263 | NW_001811152.1 | - | 823771  | 823716  |
| Aae-1-1264 | NW_001811153.1 | + | 593309  | 593364  |
| Aae-1-1265 | NW_001811156.1 | - | 360994  | 360939  |
| Aae-1-1266 | NW_001811158.1 | + | 735333  | 735388  |
| Aae-1-1267 | NW_001811158.1 | + | 787674  | 787729  |
| Aae-1-1268 | NW_001811158.1 | - | 782140  | 782085  |
| Aae-1-1269 | NW_001811158.1 | - | 733653  | 733598  |
| Aae-1-1270 | NW_001811158.1 | - | 610873  | 610818  |
| Aae-1-1271 | NW_001811159.1 | + | 88374   | 88429   |
| Aae-1-1272 | NW_001811159.1 | + | 489536  | 489591  |
| Aae-1-1273 | NW_001811161.1 | - | 306444  | 306389  |
| Aae-1-1274 | NW_001811161.1 | - | 196254  | 196199  |
| Aae-1-1275 | NW_001811161.1 | - | 181033  | 180978  |
| Aae-1-1276 | NW_001811163.1 | - | 2698983 | 2698928 |
| Aae-1-1277 | NW_001811163.1 | - | 542100  | 542045  |
| Aae-1-1278 | NW_001811164.1 | + | 99707   | 99762   |
| Aae-1-1279 | NW_001811164.1 | + | 561452  | 561507  |
| Aae-1-1280 | NW_001811166.1 | + | 644119  | 644174  |
| Aae-1-1281 | NW_001811168.1 | - | 901990  | 901935  |
| Aae-1-1282 | NW_001811169.1 | + | 853599  | 853654  |

|            |                |   |         |         |
|------------|----------------|---|---------|---------|
| Aae-1-1283 | NW_001811170.1 | + | 115370  | 115425  |
| Aae-1-1284 | NW_001811170.1 | + | 796409  | 796464  |
| Aae-1-1285 | NW_001811171.1 | - | 774381  | 774326  |
| Aae-1-1286 | NW_001811174.1 | + | 422245  | 422300  |
| Aae-1-1287 | NW_001811174.1 | - | 3231435 | 3231380 |
| Aae-1-1288 | NW_001811174.1 | - | 2080197 | 2080142 |
| Aae-1-1289 | NW_001811174.1 | - | 421187  | 421132  |
| Aae-1-1290 | NW_001811174.1 | - | 51370   | 51315   |
| Aae-1-1291 | NW_001811176.1 | - | 131371  | 131316  |
| Aae-1-1292 | NW_001811179.1 | + | 430125  | 430180  |
| Aae-1-1293 | NW_001811179.1 | + | 903287  | 903342  |
| Aae-1-1294 | NW_001811179.1 | - | 320368  | 320313  |
| Aae-1-1295 | NW_001811180.1 | + | 744278  | 744333  |
| Aae-1-1296 | NW_001811180.1 | - | 935518  | 935463  |
| Aae-1-1297 | NW_001811180.1 | - | 743322  | 743267  |
| Aae-1-1298 | NW_001811182.1 | + | 667303  | 667358  |
| Aae-1-1299 | NW_001811182.1 | - | 372156  | 372101  |
| Aae-1-1300 | NW_001811183.1 | - | 528769  | 528714  |
| Aae-1-1301 | NW_001811183.1 | - | 77397   | 77342   |
| Aae-1-1302 | NW_001811185.1 | + | 80941   | 80996   |
| Aae-1-1303 | NW_001811185.1 | + | 326344  | 326399  |
| Aae-1-1304 | NW_001811185.1 | + | 1777641 | 1777696 |
| Aae-1-1305 | NW_001811185.1 | - | 79712   | 79657   |
| Aae-1-1306 | NW_001811186.1 | + | 620204  | 620259  |
| Aae-1-1307 | NW_001811186.1 | - | 749590  | 749535  |
| Aae-1-1308 | NW_001811186.1 | - | 500790  | 500735  |
| Aae-1-1309 | NW_001811190.1 | - | 590271  | 590216  |
| Aae-1-1310 | NW_001811191.1 | + | 188777  | 188832  |
| Aae-1-1311 | NW_001811191.1 | - | 635969  | 635914  |
| Aae-1-1312 | NW_001811192.1 | - | 320274  | 320219  |
| Aae-1-1313 | NW_001811193.1 | + | 505674  | 505729  |
| Aae-1-1314 | NW_001811193.1 | + | 694509  | 694564  |
| Aae-1-1315 | NW_001811194.1 | + | 58480   | 58535   |
| Aae-1-1316 | NW_001811194.1 | + | 221574  | 221629  |
| Aae-1-1317 | NW_001811194.1 | + | 691744  | 691799  |
| Aae-1-1318 | NW_001811196.1 | + | 2880944 | 2880999 |
| Aae-1-1319 | NW_001811196.1 | + | 3156462 | 3156517 |
| Aae-1-1320 | NW_001811197.1 | + | 893031  | 893086  |
| Aae-1-1321 | NW_001811198.1 | + | 755135  | 755190  |
| Aae-1-1322 | NW_001811201.1 | + | 446488  | 446543  |
| Aae-1-1323 | NW_001811201.1 | - | 91384   | 91329   |
| Aae-1-1324 | NW_001811201.1 | - | 52684   | 52629   |
| Aae-1-1325 | NW_001811202.1 | + | 627061  | 627116  |
| Aae-1-1326 | NW_001811203.1 | - | 167041  | 166986  |
| Aae-1-1327 | NW_001811204.1 | + | 2824    | 2879    |
| Aae-1-1328 | NW_001811204.1 | - | 537631  | 537576  |
| Aae-1-1329 | NW_001811204.1 | - | 360069  | 360014  |
| Aae-1-1330 | NW_001811205.1 | - | 921347  | 921292  |
| Aae-1-1331 | NW_001811205.1 | - | 920182  | 920127  |
| Aae-1-1332 | NW_001811207.1 | + | 1413009 | 1413064 |
| Aae-1-1333 | NW_001811207.1 | - | 3076955 | 3076900 |
| Aae-1-1334 | NW_001811207.1 | - | 1229507 | 1229452 |

|            |                |   |         |         |
|------------|----------------|---|---------|---------|
| Aae-1-1335 | NW_001811208.1 | + | 590622  | 590677  |
| Aae-1-1336 | NW_001811208.1 | + | 731899  | 731954  |
| Aae-1-1337 | NW_001811211.1 | - | 324779  | 324724  |
| Aae-1-1338 | NW_001811214.1 | + | 201165  | 201220  |
| Aae-1-1339 | NW_001811214.1 | - | 576032  | 575977  |
| Aae-1-1340 | NW_001811216.1 | + | 937902  | 937957  |
| Aae-1-1341 | NW_001811217.1 | - | 250158  | 250103  |
| Aae-1-1342 | NW_001811218.1 | - | 151084  | 151029  |
| Aae-1-1343 | NW_001811219.1 | + | 453003  | 453058  |
| Aae-1-1344 | NW_001811219.1 | + | 806916  | 806971  |
| Aae-1-1345 | NW_001811219.1 | - | 194698  | 194643  |
| Aae-1-1346 | NW_001811221.1 | + | 293288  | 293343  |
| Aae-1-1347 | NW_001811221.1 | + | 381856  | 381911  |
| Aae-1-1348 | NW_001811221.1 | + | 801787  | 801842  |
| Aae-1-1349 | NW_001811221.1 | + | 872950  | 873005  |
| Aae-1-1350 | NW_001811222.1 | - | 749825  | 749770  |
| Aae-1-1351 | NW_001811222.1 | - | 530609  | 530554  |
| Aae-1-1352 | NW_001811225.1 | + | 382895  | 382950  |
| Aae-1-1353 | NW_001811226.1 | - | 937204  | 937149  |
| Aae-1-1354 | NW_001811227.1 | - | 580079  | 580024  |
| Aae-1-1355 | NW_001811227.1 | - | 342852  | 342797  |
| Aae-1-1356 | NW_001811228.1 | + | 161708  | 161763  |
| Aae-1-1357 | NW_001811229.1 | + | 305057  | 305112  |
| Aae-1-1358 | NW_001811230.1 | + | 750538  | 750593  |
| Aae-1-1359 | NW_001811230.1 | - | 202749  | 202694  |
| Aae-1-1360 | NW_001811232.1 | + | 686391  | 686446  |
| Aae-1-1361 | NW_001811232.1 | - | 709942  | 709887  |
| Aae-1-1362 | NW_001811235.1 | + | 357395  | 357450  |
| Aae-1-1363 | NW_001811235.1 | + | 885565  | 885620  |
| Aae-1-1364 | NW_001811235.1 | - | 438711  | 438656  |
| Aae-1-1365 | NW_001811240.1 | - | 3359601 | 3359546 |
| Aae-1-1366 | NW_001811240.1 | - | 28993   | 28938   |
| Aae-1-1367 | NW_001811241.1 | - | 608137  | 608082  |
| Aae-1-1368 | NW_001811243.1 | + | 780687  | 780742  |
| Aae-1-1369 | NW_001811244.1 | + | 41772   | 41827   |
| Aae-1-1370 | NW_001811244.1 | + | 437711  | 437766  |
| Aae-1-1371 | NW_001811245.1 | + | 610567  | 610622  |
| Aae-1-1372 | NW_001811245.1 | - | 607124  | 607069  |
| Aae-1-1373 | NW_001811248.1 | - | 444406  | 444351  |
| Aae-1-1374 | NW_001811252.1 | + | 1624133 | 1624188 |
| Aae-1-1375 | NW_001811252.1 | + | 2637725 | 2637780 |
| Aae-1-1376 | NW_001811252.1 | - | 1896349 | 1896294 |
| Aae-1-1377 | NW_001811254.1 | + | 754057  | 754112  |
| Aae-1-1378 | NW_001811255.1 | + | 184571  | 184626  |
| Aae-1-1379 | NW_001811255.1 | - | 852606  | 852551  |
| Aae-1-1380 | NW_001811255.1 | - | 183007  | 182952  |
| Aae-1-1381 | NW_001811257.1 | - | 506576  | 506521  |
| Aae-1-1382 | NW_001811259.1 | + | 242417  | 242472  |
| Aae-1-1383 | NW_001811259.1 | - | 157666  | 157611  |
| Aae-1-1384 | NW_001811260.1 | + | 279146  | 279201  |
| Aae-1-1385 | NW_001811260.1 | - | 295898  | 295843  |
| Aae-1-1386 | NW_001811260.1 | - | 284418  | 284363  |

|            |                |   |         |         |
|------------|----------------|---|---------|---------|
| Aae-1-1387 | NW_001811262.1 | + | 308771  | 308826  |
| Aae-1-1388 | NW_001811263.1 | + | 851335  | 851390  |
| Aae-1-1389 | NW_001811263.1 | - | 2172182 | 2172127 |
| Aae-1-1390 | NW_001811264.1 | + | 360319  | 360374  |
| Aae-1-1391 | NW_001811266.1 | + | 293575  | 293630  |
| Aae-1-1392 | NW_001811266.1 | + | 567036  | 567091  |
| Aae-1-1393 | NW_001811267.1 | + | 667235  | 667290  |
| Aae-1-1394 | NW_001811268.1 | - | 802187  | 802132  |
| Aae-1-1395 | NW_001811272.1 | - | 656586  | 656531  |
| Aae-1-1396 | NW_001811273.1 | - | 652327  | 652272  |
| Aae-1-1397 | NW_001811274.1 | + | 2106991 | 2107046 |
| Aae-1-1398 | NW_001811274.1 | + | 2459085 | 2459140 |
| Aae-1-1399 | NW_001811274.1 | - | 660668  | 660613  |
| Aae-1-1400 | NW_001811276.1 | - | 124498  | 124443  |
| Aae-1-1401 | NW_001811277.1 | + | 662355  | 662410  |
| Aae-1-1402 | NW_001811277.1 | - | 658786  | 658731  |
| Aae-1-1403 | NW_001811279.1 | + | 802169  | 802224  |
| Aae-1-1404 | NW_001811280.1 | - | 552806  | 552751  |
| Aae-1-1405 | NW_001811283.1 | - | 156344  | 156289  |
| Aae-1-1406 | NW_001811284.1 | - | 114386  | 114331  |
| Aae-1-1407 | NW_001811284.1 | - | 75794   | 75739   |
| Aae-1-1408 | NW_001811285.1 | + | 352730  | 352785  |
| Aae-1-1409 | NW_001811285.1 | + | 2879605 | 2879660 |
| Aae-1-1410 | NW_001811285.1 | - | 2878710 | 2878655 |
| Aae-1-1411 | NW_001811285.1 | - | 2318339 | 2318284 |
| Aae-1-1412 | NW_001811285.1 | - | 1346879 | 1346824 |
| Aae-1-1413 | NW_001811285.1 | - | 1019970 | 1019915 |
| Aae-1-1414 | NW_001811287.1 | - | 535766  | 535711  |
| Aae-1-1415 | NW_001811288.1 | + | 1003    | 1058    |
| Aae-1-1416 | NW_001811288.1 | - | 521643  | 521588  |
| Aae-1-1417 | NW_001811288.1 | - | 476741  | 476686  |
| Aae-1-1418 | NW_001811296.1 | + | 2713349 | 2713404 |
| Aae-1-1419 | NW_001811296.1 | - | 463229  | 463174  |
| Aae-1-1420 | NW_001811297.1 | - | 630618  | 630563  |
| Aae-1-1421 | NW_001811297.1 | - | 628706  | 628651  |
| Aae-1-1422 | NW_001811298.1 | + | 267622  | 267677  |
| Aae-1-1423 | NW_001811298.1 | - | 490505  | 490450  |
| Aae-1-1424 | NW_001811299.1 | - | 407795  | 407740  |
| Aae-1-1425 | NW_001811299.1 | - | 405097  | 405042  |
| Aae-1-1426 | NW_001811300.1 | + | 773624  | 773679  |
| Aae-1-1427 | NW_001811300.1 | - | 773135  | 773080  |
| Aae-1-1428 | NW_001811300.1 | - | 308762  | 308707  |
| Aae-1-1429 | NW_001811301.1 | + | 327197  | 327252  |
| Aae-1-1430 | NW_001811301.1 | - | 730450  | 730395  |
| Aae-1-1431 | NW_001811302.1 | - | 362182  | 362127  |
| Aae-1-1432 | NW_001811304.1 | + | 343528  | 343583  |
| Aae-1-1433 | NW_001811304.1 | + | 548707  | 548762  |
| Aae-1-1434 | NW_001811307.1 | + | 1103891 | 1103946 |
| Aae-1-1435 | NW_001811307.1 | + | 2377214 | 2377269 |
| Aae-1-1436 | NW_001811307.1 | - | 2210720 | 2210665 |
| Aae-1-1437 | NW_001811308.1 | - | 529408  | 529353  |
| Aae-1-1438 | NW_001811309.1 | + | 608837  | 608892  |

|            |                |   |         |         |
|------------|----------------|---|---------|---------|
| Aae-1-1439 | NW_001811309.1 | - | 607493  | 607438  |
| Aae-1-1440 | NW_001811310.1 | + | 662486  | 662541  |
| Aae-1-1441 | NW_001811312.1 | + | 231532  | 231587  |
| Aae-1-1442 | NW_001811313.1 | + | 80031   | 80086   |
| Aae-1-1443 | NW_001811313.1 | + | 82743   | 82798   |
| Aae-1-1444 | NW_001811313.1 | - | 518267  | 518212  |
| Aae-1-1445 | NW_001811313.1 | - | 77031   | 76976   |
| Aae-1-1446 | NW_001811315.1 | + | 241210  | 241265  |
| Aae-1-1447 | NW_001811315.1 | - | 670242  | 670187  |
| Aae-1-1448 | NW_001811317.1 | + | 262657  | 262712  |
| Aae-1-1449 | NW_001811317.1 | + | 499723  | 499778  |
| Aae-1-1450 | NW_001811322.1 | + | 690391  | 690446  |
| Aae-1-1451 | NW_001811323.1 | - | 254790  | 254735  |
| Aae-1-1452 | NW_001811329.1 | + | 405791  | 405846  |
| Aae-1-1453 | NW_001811329.1 | + | 1874274 | 1874329 |
| Aae-1-1454 | NW_001811329.1 | + | 1929849 | 1929904 |
| Aae-1-1455 | NW_001811329.1 | + | 2006024 | 2006079 |
| Aae-1-1456 | NW_001811329.1 | - | 2241258 | 2241203 |
| Aae-1-1457 | NW_001811329.1 | - | 1808507 | 1808452 |
| Aae-1-1458 | NW_001811331.1 | - | 727849  | 727794  |
| Aae-1-1459 | NW_001811332.1 | + | 612611  | 612666  |
| Aae-1-1460 | NW_001811334.1 | - | 99446   | 99391   |
| Aae-1-1461 | NW_001811334.1 | - | 9715    | 9660    |
| Aae-1-1462 | NW_001811335.1 | - | 572528  | 572473  |
| Aae-1-1463 | NW_001811336.1 | + | 457628  | 457683  |
| Aae-1-1464 | NW_001811337.1 | + | 365238  | 365293  |
| Aae-1-1465 | NW_001811339.1 | + | 648178  | 648233  |
| Aae-1-1466 | NW_001811340.1 | - | 2841166 | 2841111 |
| Aae-1-1467 | NW_001811345.1 | - | 375920  | 375865  |
| Aae-1-1468 | NW_001811345.1 | - | 267972  | 267917  |
| Aae-1-1469 | NW_001811350.1 | + | 651287  | 651342  |
| Aae-1-1470 | NW_001811350.1 | - | 688764  | 688709  |
| Aae-1-1471 | NW_001811351.1 | + | 11987   | 12042   |
| Aae-1-1472 | NW_001811351.1 | + | 179853  | 179908  |
| Aae-1-1473 | NW_001811351.1 | - | 3326764 | 3326709 |
| Aae-1-1474 | NW_001811351.1 | - | 2648595 | 2648540 |
| Aae-1-1475 | NW_001811351.1 | - | 1588606 | 1588551 |
| Aae-1-1476 | NW_001811352.1 | + | 515812  | 515867  |
| Aae-1-1477 | NW_001811352.1 | + | 655237  | 655292  |
| Aae-1-1478 | NW_001811352.1 | + | 2529569 | 2529624 |
| Aae-1-1479 | NW_001811352.1 | - | 448051  | 447996  |
| Aae-1-1480 | NW_001811354.1 | + | 303325  | 303380  |
| Aae-1-1481 | NW_001811354.1 | - | 301576  | 301521  |
| Aae-1-1482 | NW_001811356.1 | - | 426022  | 425967  |
| Aae-1-1483 | NW_001811357.1 | - | 149303  | 149248  |
| Aae-1-1484 | NW_001811360.1 | - | 469263  | 469208  |
| Aae-1-1485 | NW_001811362.1 | - | 684688  | 684633  |
| Aae-1-1486 | NW_001811363.1 | + | 15157   | 15212   |
| Aae-1-1487 | NW_001811363.1 | + | 1587475 | 1587530 |
| Aae-1-1488 | NW_001811363.1 | - | 2168220 | 2168165 |
| Aae-1-1489 | NW_001811364.1 | + | 142320  | 142375  |
| Aae-1-1490 | NW_001811366.1 | + | 2544    | 2599    |

|            |                |   |         |         |
|------------|----------------|---|---------|---------|
| Aae-1-1491 | NW_001811366.1 | + | 153381  | 153436  |
| Aae-1-1492 | NW_001811366.1 | - | 491339  | 491284  |
| Aae-1-1493 | NW_001811367.1 | - | 431098  | 431043  |
| Aae-1-1494 | NW_001811367.1 | - | 123844  | 123789  |
| Aae-1-1495 | NW_001811368.1 | + | 649991  | 650046  |
| Aae-1-1496 | NW_001811371.1 | + | 464784  | 464839  |
| Aae-1-1497 | NW_001811371.1 | + | 566496  | 566551  |
| Aae-1-1498 | NW_001811372.1 | + | 411520  | 411575  |
| Aae-1-1499 | NW_001811372.1 | - | 648874  | 648819  |
| Aae-1-1500 | NW_001811373.1 | - | 202663  | 202608  |
| Aae-1-1501 | NW_001811374.1 | + | 49936   | 49991   |
| Aae-1-1502 | NW_001811375.1 | - | 529825  | 529770  |
| Aae-1-1503 | NW_001811375.1 | - | 29892   | 29837   |
| Aae-1-1504 | NW_001811377.1 | + | 466635  | 466690  |
| Aae-1-1505 | NW_001811377.1 | - | 453492  | 453437  |
| Aae-1-1506 | NW_001811379.1 | - | 218952  | 218897  |
| Aae-1-1507 | NW_001811382.1 | - | 715556  | 715501  |
| Aae-1-1508 | NW_001811383.1 | + | 179396  | 179451  |
| Aae-1-1509 | NW_001811383.1 | + | 186566  | 186621  |
| Aae-1-1510 | NW_001811385.1 | + | 515862  | 515917  |
| Aae-1-1511 | NW_001811385.1 | + | 1055382 | 1055437 |
| Aae-1-1512 | NW_001811385.1 | - | 1300754 | 1300699 |
| Aae-1-1513 | NW_001811385.1 | - | 277122  | 277067  |
| Aae-1-1514 | NW_001811392.1 | - | 552194  | 552139  |
| Aae-1-1515 | NW_001811396.1 | - | 847878  | 847823  |
| Aae-1-1516 | NW_001811398.1 | + | 222871  | 222926  |
| Aae-1-1517 | NW_001811403.1 | - | 633548  | 633493  |
| Aae-1-1518 | NW_001811403.1 | - | 571048  | 570993  |
| Aae-1-1519 | NW_001811406.1 | + | 254020  | 254075  |
| Aae-1-1520 | NW_001811406.1 | + | 466889  | 466944  |
| Aae-1-1521 | NW_001811407.1 | + | 3097    | 3152    |
| Aae-1-1522 | NW_001811407.1 | + | 96184   | 96239   |
| Aae-1-1523 | NW_001811407.1 | + | 1798052 | 1798107 |
| Aae-1-1524 | NW_001811407.1 | + | 2655734 | 2655789 |
| Aae-1-1525 | NW_001811407.1 | + | 2871653 | 2871708 |
| Aae-1-1526 | NW_001811407.1 | - | 2952592 | 2952537 |
| Aae-1-1527 | NW_001811409.1 | - | 635486  | 635431  |
| Aae-1-1528 | NW_001811412.1 | + | 479319  | 479374  |
| Aae-1-1529 | NW_001811413.1 | + | 605977  | 606032  |
| Aae-1-1530 | NW_001811415.1 | - | 423148  | 423093  |
| Aae-1-1531 | NW_001811416.1 | - | 623820  | 623765  |
| Aae-1-1532 | NW_001811417.1 | - | 537220  | 537165  |
| Aae-1-1533 | NW_001811417.1 | - | 107618  | 107563  |
| Aae-1-1534 | NW_001811418.1 | + | 1534073 | 1534128 |
| Aae-1-1535 | NW_001811418.1 | - | 2169205 | 2169150 |
| Aae-1-1536 | NW_001811419.1 | - | 453338  | 453283  |
| Aae-1-1537 | NW_001811426.1 | - | 699999  | 699944  |
| Aae-1-1538 | NW_001811429.1 | - | 1848225 | 1848170 |
| Aae-1-1539 | NW_001811437.1 | + | 199414  | 199469  |
| Aae-1-1540 | NW_001811437.1 | - | 194703  | 194648  |
| Aae-1-1541 | NW_001811440.1 | + | 893809  | 893864  |
| Aae-1-1542 | NW_001811441.1 | + | 390304  | 390359  |

|            |                |   |         |         |
|------------|----------------|---|---------|---------|
| Aae-1-1543 | NW_001811441.1 | + | 565672  | 565727  |
| Aae-1-1544 | NW_001811445.1 | + | 7637    | 7692    |
| Aae-1-1545 | NW_001811445.1 | - | 100707  | 100652  |
| Aae-1-1546 | NW_001811445.1 | - | 7066    | 7011    |
| Aae-1-1547 | NW_001811449.1 | + | 124714  | 124769  |
| Aae-1-1548 | NW_001811450.1 | + | 327429  | 327484  |
| Aae-1-1549 | NW_001811451.1 | + | 1345703 | 1345758 |
| Aae-1-1550 | NW_001811451.1 | - | 2119456 | 2119401 |
| Aae-1-1551 | NW_001811454.1 | + | 395     | 450     |
| Aae-1-1552 | NW_001811457.1 | - | 410443  | 410388  |
| Aae-1-1553 | NW_001811458.1 | - | 325801  | 325746  |
| Aae-1-1554 | NW_001811462.1 | + | 1060870 | 1060925 |
| Aae-1-1555 | NW_001811462.1 | + | 1309701 | 1309756 |
| Aae-1-1556 | NW_001811462.1 | + | 2824134 | 2824189 |
| Aae-1-1557 | NW_001811462.1 | + | 3173779 | 3173834 |
| Aae-1-1558 | NW_001811462.1 | - | 3417954 | 3417899 |
| Aae-1-1559 | NW_001811462.1 | - | 1307460 | 1307405 |
| Aae-1-1560 | NW_001811466.1 | + | 336100  | 336155  |
| Aae-1-1561 | NW_001811473.1 | + | 324744  | 324799  |
| Aae-1-1562 | NW_001811474.1 | + | 1806624 | 1806679 |
| Aae-1-1563 | NW_001811474.1 | - | 2692960 | 2692905 |
| Aae-1-1564 | NW_001811474.1 | - | 2207113 | 2207058 |
| Aae-1-1565 | NW_001811474.1 | - | 1857426 | 1857371 |
| Aae-1-1566 | NW_001811476.1 | - | 420437  | 420382  |
| Aae-1-1567 | NW_001811476.1 | - | 298887  | 298832  |
| Aae-1-1568 | NW_001811477.1 | + | 117975  | 118030  |
| Aae-1-1569 | NW_001811477.1 | + | 225256  | 225311  |
| Aae-1-1570 | NW_001811477.1 | + | 397986  | 398041  |
| Aae-1-1571 | NW_001811484.1 | - | 519838  | 519783  |
| Aae-1-1572 | NW_001811492.1 | - | 108639  | 108584  |
| Aae-1-1573 | NW_001811493.1 | + | 93670   | 93725   |
| Aae-1-1574 | NW_001811495.1 | + | 452671  | 452726  |
| Aae-1-1575 | NW_001811495.1 | + | 476171  | 476226  |
| Aae-1-1576 | NW_001811496.1 | + | 1870000 | 1870055 |
| Aae-1-1577 | NW_001811496.1 | + | 2014695 | 2014750 |
| Aae-1-1578 | NW_001811501.1 | + | 53248   | 53303   |
| Aae-1-1579 | NW_001811502.1 | - | 69937   | 69882   |
| Aae-1-1580 | NW_001811504.1 | - | 50599   | 50544   |
| Aae-1-1581 | NW_001811506.1 | + | 278108  | 278163  |
| Aae-1-1582 | NW_001811512.1 | + | 13100   | 13155   |
| Aae-1-1583 | NW_001811514.1 | + | 60021   | 60076   |
| Aae-1-1584 | NW_001811514.1 | + | 95710   | 95765   |
| Aae-1-1585 | NW_001811514.1 | + | 290737  | 290792  |
| Aae-1-1586 | NW_001811514.1 | + | 600234  | 600289  |
| Aae-1-1587 | NW_001811514.1 | - | 447376  | 447321  |
| Aae-1-1588 | NW_001811514.1 | - | 287398  | 287343  |
| Aae-1-1589 | NW_001811514.1 | - | 284696  | 284641  |
| Aae-1-1590 | NW_001811517.1 | + | 107569  | 107624  |
| Aae-1-1591 | NW_001811519.1 | - | 135294  | 135239  |
| Aae-1-1592 | NW_001811521.1 | - | 369012  | 368957  |
| Aae-1-1593 | NW_001811527.1 | - | 306976  | 306921  |
| Aae-1-1594 | NW_001811528.1 | - | 515581  | 515526  |



|            |                |   |         |         |
|------------|----------------|---|---------|---------|
| Aae-1-1595 | NW_001811528.1 | - | 152460  | 152405  |
| Aae-1-1596 | NW_001811529.1 | + | 1541871 | 1541926 |
| Aae-1-1597 | NW_001811529.1 | + | 2631610 | 2631665 |
| Aae-1-1598 | NW_001811529.1 | - | 2456583 | 2456528 |
| Aae-1-1599 | NW_001811529.1 | - | 1540375 | 1540320 |
| Aae-1-1600 | NW_001811533.1 | - | 359998  | 359943  |
| Aae-1-1601 | NW_001811534.1 | + | 96204   | 96259   |
| Aae-1-1602 | NW_001811534.1 | - | 418610  | 418555  |
| Aae-1-1603 | NW_001811535.1 | - | 344781  | 344726  |
| Aae-1-1604 | NW_001811540.1 | + | 2652824 | 2652879 |
| Aae-1-1605 | NW_001811540.1 | - | 2586657 | 2586602 |
| Aae-1-1606 | NW_001811544.1 | - | 55644   | 55589   |
| Aae-1-1607 | NW_001811548.1 | + | 218373  | 218428  |
| Aae-1-1608 | NW_001811549.1 | + | 34825   | 34880   |
| Aae-1-1609 | NW_001811550.1 | - | 413372  | 413317  |
| Aae-1-1610 | NW_001811551.1 | + | 376196  | 376251  |
| Aae-1-1611 | NW_001811551.1 | + | 518405  | 518460  |
| Aae-1-1612 | NW_001811551.1 | + | 1817314 | 1817369 |
| Aae-1-1613 | NW_001811555.1 | + | 469456  | 469511  |
| Aae-1-1614 | NW_001811562.1 | + | 183769  | 183824  |
| Aae-1-1615 | NW_001811562.1 | + | 581048  | 581103  |
| Aae-1-1616 | NW_001811562.1 | + | 808168  | 808223  |
| Aae-1-1617 | NW_001811562.1 | + | 2484478 | 2484533 |
| Aae-1-1618 | NW_001811563.1 | - | 123376  | 123321  |
| Aae-1-1619 | NW_001811565.1 | - | 53657   | 53602   |
| Aae-1-1620 | NW_001811567.1 | - | 300043  | 299988  |
| Aae-1-1621 | NW_001811571.1 | + | 426245  | 426300  |
| Aae-1-1622 | NW_001811573.1 | + | 118844  | 118899  |
| Aae-1-1623 | NW_001811573.1 | - | 4897822 | 4897767 |
| Aae-1-1624 | NW_001811573.1 | - | 4791962 | 4791907 |
| Aae-1-1625 | NW_001811573.1 | - | 52538   | 52483   |
| Aae-1-1626 | NW_001811574.1 | - | 2208461 | 2208406 |
| Aae-1-1627 | NW_001811574.1 | - | 2205763 | 2205708 |
| Aae-1-1628 | NW_001811574.1 | - | 1550457 | 1550402 |
| Aae-1-1629 | NW_001811575.1 | - | 254817  | 254762  |
| Aae-1-1630 | NW_001811580.1 | + | 518     | 573     |
| Aae-1-1631 | NW_001811584.1 | + | 58436   | 58491   |
| Aae-1-1632 | NW_001811590.1 | - | 286729  | 286674  |
| Aae-1-1633 | NW_001811591.1 | + | 252434  | 252489  |
| Aae-1-1634 | NW_001811596.1 | - | 728778  | 728723  |
| Aae-1-1635 | NW_001811596.1 | - | 516121  | 516066  |
| Aae-1-1636 | NW_001811599.1 | + | 169378  | 169433  |
| Aae-1-1637 | NW_001811599.1 | - | 231051  | 230996  |
| Aae-1-1638 | NW_001811602.1 | - | 135837  | 135782  |
| Aae-1-1639 | NW_001811603.1 | + | 153028  | 153083  |
| Aae-1-1640 | NW_001811606.1 | - | 198728  | 198673  |
| Aae-1-1641 | NW_001811607.1 | + | 542953  | 543008  |
| Aae-1-1642 | NW_001811607.1 | + | 1601107 | 1601162 |
| Aae-1-1643 | NW_001811607.1 | + | 1742536 | 1742591 |
| Aae-1-1644 | NW_001811607.1 | + | 2783872 | 2783927 |
| Aae-1-1645 | NW_001811608.1 | + | 119011  | 119066  |
| Aae-1-1646 | NW_001811609.1 | + | 7069    | 7124    |

|            |                |   |         |         |
|------------|----------------|---|---------|---------|
| Aae-1-1647 | NW_001811609.1 | - | 164441  | 164386  |
| Aae-1-1648 | NW_001811610.1 | + | 164818  | 164873  |
| Aae-1-1649 | NW_001811612.1 | - | 184378  | 184323  |
| Aae-1-1650 | NW_001811612.1 | - | 168521  | 168466  |
| Aae-1-1651 | NW_001811614.1 | - | 402533  | 402478  |
| Aae-1-1652 | NW_001811618.1 | + | 761260  | 761315  |
| Aae-1-1653 | NW_001811618.1 | - | 1116512 | 1116457 |
| Aae-1-1654 | NW_001811618.1 | - | 886296  | 886241  |
| Aae-1-1655 | NW_001811620.1 | + | 248992  | 249047  |
| Aae-1-1656 | NW_001811621.1 | - | 353145  | 353090  |
| Aae-1-1657 | NW_001811623.1 | - | 427452  | 427397  |
| Aae-1-1658 | NW_001811623.1 | - | 424865  | 424810  |
| Aae-1-1659 | NW_001811623.1 | - | 71971   | 71916   |
| Aae-1-1660 | NW_001811627.1 | + | 177838  | 177893  |
| Aae-1-1661 | NW_001811627.1 | + | 374211  | 374266  |
| Aae-1-1662 | NW_001811631.1 | + | 44387   | 44442   |
| Aae-1-1663 | NW_001811635.1 | + | 326426  | 326481  |
| Aae-1-1664 | NW_001811635.1 | - | 56533   | 56478   |
| Aae-1-1665 | NW_001811639.1 | - | 421858  | 421803  |
| Aae-1-1666 | NW_001811640.1 | + | 1295357 | 1295412 |
| Aae-1-1667 | NW_001811641.1 | + | 258946  | 259001  |
| Aae-1-1668 | NW_001811645.1 | + | 156090  | 156145  |
| Aae-1-1669 | NW_001811648.1 | + | 84539   | 84594   |
| Aae-1-1670 | NW_001811650.1 | - | 188180  | 188125  |
| Aae-1-1671 | NW_001811651.1 | + | 132447  | 132502  |
| Aae-1-1672 | NW_001811651.1 | + | 223125  | 223180  |
| Aae-1-1673 | NW_001811651.1 | + | 2669699 | 2669754 |
| Aae-1-1674 | NW_001811651.1 | - | 1653622 | 1653567 |
| Aae-1-1675 | NW_001811651.1 | - | 111766  | 111711  |
| Aae-1-1676 | NW_001811652.1 | - | 35696   | 35641   |
| Aae-1-1677 | NW_001811661.1 | + | 363931  | 363986  |
| Aae-1-1678 | NW_001811662.1 | - | 18510   | 18455   |
| Aae-1-1679 | NW_001811665.1 | + | 143486  | 143541  |
| Aae-1-1680 | NW_001811666.1 | - | 276802  | 276747  |
| Aae-1-1681 | NW_001811671.1 | + | 352480  | 352535  |
| Aae-1-1682 | NW_001811672.1 | - | 95421   | 95366   |
| Aae-1-1683 | NW_001811672.1 | - | 17055   | 17000   |
| Aae-1-1684 | NW_001811673.1 | + | 144176  | 144231  |
| Aae-1-1685 | NW_001811673.1 | + | 926486  | 926541  |
| Aae-1-1686 | NW_001811677.1 | + | 279024  | 279079  |
| Aae-1-1687 | NW_001811684.1 | + | 4310742 | 4310797 |
| Aae-1-1688 | NW_001811692.1 | - | 124763  | 124708  |
| Aae-1-1689 | NW_001811692.1 | - | 92279   | 92224   |
| Aae-1-1690 | NW_001811695.1 | - | 120472  | 120417  |
| Aae-1-1691 | NW_001811702.1 | + | 253824  | 253879  |
| Aae-1-1692 | NW_001811703.1 | + | 376130  | 376185  |
| Aae-1-1693 | NW_001811705.1 | + | 151255  | 151310  |
| Aae-1-1694 | NW_001811705.1 | + | 215778  | 215833  |
| Aae-1-1695 | NW_001811707.1 | + | 1837305 | 1837360 |
| Aae-1-1696 | NW_001811708.1 | - | 303644  | 303589  |
| Aae-1-1697 | NW_001811711.1 | + | 210465  | 210520  |
| Aae-1-1698 | NW_001811711.1 | - | 184211  | 184156  |

|            |                |   |         |         |
|------------|----------------|---|---------|---------|
| Aae-1-1699 | NW_001811717.1 | - | 81994   | 81939   |
| Aae-1-1700 | NW_001811718.1 | + | 1039034 | 1039089 |
| Aae-1-1701 | NW_001811718.1 | - | 51747   | 51692   |
| Aae-1-1702 | NW_001811725.1 | + | 241695  | 241750  |
| Aae-1-1703 | NW_001811727.1 | + | 247922  | 247977  |
| Aae-1-1704 | NW_001811727.1 | - | 342820  | 342765  |
| Aae-1-1705 | NW_001811729.1 | - | 2511832 | 2511777 |
| Aae-1-1706 | NW_001811729.1 | - | 1491583 | 1491528 |
| Aae-1-1707 | NW_001811732.1 | - | 280985  | 280930  |
| Aae-1-1708 | NW_001811739.1 | - | 1866506 | 1866451 |
| Aae-1-1709 | NW_001811740.1 | + | 285803  | 285858  |
| Aae-1-1710 | NW_001811748.1 | + | 10926   | 10981   |
| Aae-1-1711 | NW_001811749.1 | - | 146301  | 146246  |
| Aae-1-1712 | NW_001811750.1 | + | 1668879 | 1668934 |
| Aae-1-1713 | NW_001811752.1 | - | 105881  | 105826  |
| Aae-1-1714 | NW_001811758.1 | - | 35731   | 35676   |
| Aae-1-1715 | NW_001811761.1 | - | 1737208 | 1737153 |
| Aae-1-1716 | NW_001811762.1 | + | 312132  | 312187  |
| Aae-1-1717 | NW_001811766.1 | + | 22910   | 22965   |
| Aae-1-1718 | NW_001811772.1 | + | 1536584 | 1536639 |
| Aae-1-1719 | NW_001811776.1 | + | 75400   | 75455   |
| Aae-1-1720 | NW_001811781.1 | + | 28      | 83      |
| Aae-1-1721 | NW_001811783.1 | + | 1939693 | 1939748 |
| Aae-1-1722 | NW_001811783.1 | - | 2034606 | 2034551 |
| Aae-1-1723 | NW_001811783.1 | - | 1938195 | 1938140 |
| Aae-1-1724 | NW_001811783.1 | - | 1935497 | 1935442 |
| Aae-1-1725 | NW_001811786.1 | - | 51686   | 51631   |
| Aae-1-1726 | NW_001811789.1 | + | 175668  | 175723  |
| Aae-1-1727 | NW_001835323.1 | + | 4843    | 4898    |
| Aae-1-1728 | NW_001835328.1 | - | 4212    | 4157    |
| Aae-1-1729 | NW_001835585.1 | + | 2067    | 2122    |
| Aae-1-1730 | NW_001835623.1 | - | 4236    | 4181    |
| Aae-1-1731 | NW_001835701.1 | + | 5440    | 5495    |
| Aae-1-1732 | NW_001835894.1 | - | 5438    | 5383    |
| Aae-1-1733 | NW_001835948.1 | - | 5982    | 5927    |
| Aae-1-1734 | NW_001836081.1 | - | 1732    | 1677    |
| Aae-1-1735 | NW_001836302.1 | - | 1196    | 1141    |
| Aae-1-1736 | NW_001836630.1 | - | 2016    | 1961    |
| Aae-1-1737 | NW_001836900.1 | + | 610     | 665     |
| Aae-1-1738 | NW_001837216.1 | - | 9348    | 9293    |
| Aae-1-1739 | NW_001837245.1 | - | 4567    | 4512    |
| Aae-1-1740 | NW_001837408.1 | + | 249     | 304     |
| Aae-1-1741 | NW_001837454.1 | + | 10149   | 10204   |
| Aae-1-1742 | NW_001837458.1 | + | 86960   | 87015   |
| Aae-1-1743 | NW_001811163.1 | + | 2712162 | 2712217 |
| Aae-1-1744 | NW_001835570.1 | + | 852     | 907     |
| Aae-1-1745 | NW_001811291.1 | - | 556922  | 556867  |
| Aae-1-1746 | NW_001811196.1 | + | 1996954 | 1997009 |
| Aae-1-1747 | NW_001811007.1 | + | 3712768 | 3712823 |
| Aae-1-1748 | NW_001811109.1 | - | 1090239 | 1090184 |
| Aae-1-1749 | NW_001811479.1 | - | 189402  | 189347  |
| Aae-1-1750 | NW_001810955.1 | - | 3582266 | 3582211 |

|            |                |   |         |         |
|------------|----------------|---|---------|---------|
| Aae-1-1751 | NW_001810721.1 | - | 406691  | 406636  |
| Aae-1-1752 | NW_001811385.1 | + | 1172634 | 1172689 |
| Aae-1-1753 | NW_001811707.1 | + | 530006  | 530061  |
| Aae-1-1754 | NW_001810825.1 | + | 21180   | 21235   |
| Aae-1-1755 | NW_001811027.1 | - | 406252  | 406197  |
| Aae-1-1756 | NW_001811072.1 | - | 480385  | 480330  |
| Aae-1-1757 | NW_001811147.1 | + | 206073  | 206128  |
| Aae-1-1758 | NW_001811089.1 | + | 1004079 | 1004134 |
| Aae-1-1759 | NW_001810837.1 | - | 1804641 | 1804586 |
| Aae-1-1760 | NW_001810637.1 | - | 4045985 | 4045930 |
| Aae-1-1761 | NW_001810575.1 | + | 1758766 | 1758821 |
| Aae-1-1762 | NW_001811006.1 | + | 388550  | 388605  |
| Aae-1-1763 | NW_001810239.1 | - | 38461   | 38406   |
| Aae-1-1764 | NW_001810328.1 | - | 111804  | 111749  |
| Aae-1-1765 | NW_001810350.1 | - | 981366  | 981311  |
| Aae-1-1766 | NW_001810351.1 | - | 33293   | 33238   |
| Aae-1-1767 | NW_001810513.1 | - | 46230   | 46175   |
| Aae-1-1768 | NW_001810555.1 | + | 46039   | 46094   |
| Aae-1-1769 | NW_001810805.1 | + | 645511  | 645566  |
| Aae-1-1770 | NW_001810816.1 | - | 1466363 | 1466308 |
| Aae-1-1771 | NW_001810895.1 | - | 541099  | 541044  |
| Aae-1-1772 | NW_001810935.1 | - | 311723  | 311668  |
| Aae-1-1773 | NW_001810962.1 | + | 1544277 | 1544332 |
| Aae-1-1774 | NW_001810971.1 | + | 769965  | 770020  |
| Aae-1-1775 | NW_001810988.1 | - | 757065  | 757010  |
| Aae-1-1776 | NW_001810990.1 | - | 1029779 | 1029724 |
| Aae-1-1777 | NW_001811005.1 | - | 1307950 | 1307895 |
| Aae-1-1778 | NW_001811030.1 | - | 1973962 | 1973907 |
| Aae-1-1779 | NW_001811085.1 | + | 2774702 | 2774757 |
| Aae-1-1780 | NW_001811152.1 | - | 74535   | 74480   |
| Aae-1-1781 | NW_001811183.1 | + | 543144  | 543199  |
| Aae-1-1782 | NW_001811271.1 | - | 739372  | 739317  |
| Aae-1-1783 | NW_001811285.1 | - | 2151537 | 2151482 |
| Aae-1-1784 | NW_001811327.1 | + | 685756  | 685811  |
| Aae-1-1785 | NW_001811363.1 | + | 1697692 | 1697747 |
| Aae-1-1786 | NW_001811385.1 | - | 904665  | 904610  |
| Aae-1-1787 | NW_001811396.1 | + | 1488693 | 1488748 |
| Aae-1-1788 | NW_001811435.1 | - | 81224   | 81169   |
| Aae-1-1789 | NW_001811462.1 | + | 2938967 | 2939022 |
| Aae-1-1790 | NW_001811564.1 | - | 138518  | 138463  |
| Aae-1-1791 | NW_001811761.1 | - | 1173932 | 1173877 |
| Aae-1-1792 | NW_001811777.1 | - | 52563   | 52508   |
| Aae-1-1793 | NW_001810783.1 | + | 1158382 | 1158437 |
| Aae-1-1794 | NW_001810023.1 | - | 2352312 | 2352257 |
| Aae-1-1795 | NW_001810156.1 | - | 241648  | 241593  |
| Aae-1-1796 | NW_001810714.1 | + | 877637  | 877692  |
| Aae-1-1797 | NW_001810944.1 | + | 876472  | 876527  |
| Aae-1-1798 | NW_001810955.1 | + | 435123  | 435178  |
| Aae-1-1799 | NW_001810976.1 | + | 741594  | 741649  |
| Aae-1-1800 | NW_001810997.1 | - | 1457440 | 1457385 |
| Aae-1-1801 | NW_001811031.1 | - | 159731  | 159676  |
| Aae-1-1802 | NW_001811103.1 | + | 299708  | 299763  |

|            |                |   |         |         |
|------------|----------------|---|---------|---------|
| Aae-1-1803 | NW_001811252.1 | + | 3074220 | 3074275 |
| Aae-1-1804 | NW_001811298.1 | + | 285540  | 285595  |
| Aae-1-1805 | NW_001811683.1 | + | 153395  | 153450  |
| Aae-1-1806 | NW_001811758.1 | + | 272563  | 272618  |
| Aae-1-1807 | NW_001811596.1 | - | 376774  | 376719  |
| Aae-1-1808 | NW_001811665.1 | + | 105006  | 105061  |
| Aae-1-1809 | NW_001811618.1 | + | 1241715 | 1241770 |
| Aae-1-1810 | NW_001811312.1 | + | 270790  | 270845  |
| Aae-1-1811 | NW_001811340.1 | - | 1681742 | 1681687 |
| Aae-1-1812 | NW_001811585.1 | - | 2636378 | 2636323 |
| Aae-1-1813 | NW_001811562.1 | - | 2129374 | 2129319 |
| Aae-1-1814 | NW_001811502.1 | - | 252496  | 252441  |
| Aae-1-1815 | NW_001811317.1 | + | 432166  | 432221  |
| Aae-1-1816 | NW_001811240.1 | + | 1708541 | 1708596 |
| Aae-1-1817 | NW_001810555.1 | - | 4193697 | 4193642 |
| Aae-1-1818 | NW_001811026.1 | + | 1262788 | 1262843 |
| Aae-1-1819 | NW_001811247.1 | + | 578609  | 578664  |
| Aae-1-1820 | NW_001811063.1 | + | 1590831 | 1590886 |
| Aae-1-1821 | NW_001811462.1 | - | 485228  | 485173  |
| Aae-1-1822 | NW_001811139.1 | + | 220985  | 221040  |
| Aae-1-1823 | NW_001811307.1 | + | 3057487 | 3057542 |
| Aae-1-1824 | NW_001811640.1 | - | 1918441 | 1918386 |
| Aae-1-1825 | NW_001810813.1 | - | 242692  | 242637  |
| Aae-1-1826 | NW_001811067.1 | + | 616243  | 616298  |
| Aae-1-1827 | NW_001811129.1 | - | 1847839 | 1847784 |
| Aae-1-1828 | NW_001811107.1 | - | 497555  | 497500  |
| Aae-1-1829 | NW_001810982.1 | - | 1042264 | 1042209 |
| Aae-1-1830 | NW_001809979.1 | + | 1099354 | 1099409 |
| Aae-1-1831 | NW_001809879.1 | + | 1734031 | 1734086 |
| Aae-1-1832 | NW_001811122.1 | + | 587754  | 587809  |
| Aae-1-1833 | NW_001811271.1 | + | 382256  | 382311  |
| Aae-1-1834 | NW_001811329.1 | + | 999454  | 999509  |
| Aae-1-1835 | NW_001811590.1 | - | 156389  | 156334  |
| Aae-1-1836 | NW_001809801.1 | + | 4368640 | 4368695 |
| Aae-1-1837 | NW_001809843.1 | + | 34583   | 34638   |
| Aae-1-1838 | NW_001810056.1 | - | 2204300 | 2204245 |
| Aae-1-1839 | NW_001810200.1 | + | 374094  | 374149  |
| Aae-1-1840 | NW_001810436.1 | + | 1288503 | 1288558 |
| Aae-1-1841 | NW_001810467.1 | + | 36856   | 36911   |
| Aae-1-1842 | NW_001811058.1 | - | 434569  | 434514  |
| Aae-1-1843 | NW_001811185.1 | - | 2362940 | 2362885 |
| Aae-1-1844 | NW_001811381.1 | - | 491105  | 491050  |
| Aae-1-1845 | NW_001809877.1 | + | 77948   | 78003   |
| Aae-1-1846 | NW_001810361.1 | + | 102847  | 102902  |
| Aae-1-1847 | NW_001810547.1 | - | 2218    | 2163    |
| Aae-1-1848 | NW_001810644.1 | + | 8089    | 8144    |
| Aae-1-1849 | NW_001810714.1 | - | 958060  | 958005  |
| Aae-1-1850 | NW_001810855.1 | - | 1447992 | 1447937 |
| Aae-1-1851 | NW_001810891.1 | - | 34249   | 34194   |
| Aae-1-1852 | NW_001810895.1 | - | 1320692 | 1320637 |
| Aae-1-1853 | NW_001810917.1 | + | 185592  | 185647  |
| Aae-1-1854 | NW_001811122.1 | - | 783884  | 783829  |

|            |                |   |         |         |
|------------|----------------|---|---------|---------|
| Aae-1-1855 | NW_001811186.1 | - | 595597  | 595542  |
| Aae-1-1856 | NW_001811410.1 | - | 597310  | 597255  |
| Aae-1-1857 | NW_001811252.1 | - | 266355  | 266300  |
| Aae-1-1858 | NW_001811185.1 | - | 1777627 | 1777572 |
| Aae-1-1859 | NW_001811168.1 | + | 48856   | 48911   |
| Aae-1-1860 | NW_001811130.1 | - | 899292  | 899237  |
| Aae-1-1861 | NW_001810872.1 | + | 1688948 | 1689003 |
| Aae-1-1862 | NW_001810880.1 | - | 3809433 | 3809378 |
| Aae-1-1863 | NW_001810340.1 | - | 47064   | 47009   |
| Aae-1-1864 | NW_001810855.1 | + | 1427638 | 1427693 |
| Aae-1-1865 | NW_001811041.1 | - | 3502308 | 3502253 |
| Aae-1-1866 | NW_001810328.1 | - | 1524365 | 1524310 |
| Aae-1-1867 | NW_001810371.1 | - | 1902053 | 1901998 |
| Aae-1-1868 | NW_001810425.1 | - | 1045651 | 1045596 |
| Aae-1-1869 | NW_001810696.1 | - | 328788  | 328733  |
| Aae-1-1870 | NW_001810830.1 | + | 1256847 | 1256902 |
| Aae-1-1871 | NW_001810837.1 | + | 1568851 | 1568906 |
| Aae-1-1872 | NW_001810901.1 | - | 961996  | 961941  |
| Aae-1-1873 | NW_001810947.1 | - | 1487927 | 1487872 |
| Aae-1-1874 | NW_001810985.1 | - | 426035  | 425980  |
| Aae-1-1875 | NW_001810994.1 | + | 264860  | 264915  |
| Aae-1-1876 | NW_001810999.1 | - | 1104273 | 1104218 |
| Aae-1-1877 | NW_001811007.1 | - | 3365715 | 3365660 |
| Aae-1-1878 | NW_001811021.1 | - | 866714  | 866659  |
| Aae-1-1879 | NW_001811031.1 | + | 305946  | 306001  |
| Aae-1-1880 | NW_001811104.1 | + | 707406  | 707461  |
| Aae-1-1881 | NW_001811163.1 | - | 2065692 | 2065637 |
| Aae-1-1882 | NW_001811185.1 | - | 2394162 | 2394107 |
| Aae-1-1883 | NW_001811218.1 | + | 2318606 | 2318661 |
| Aae-1-1884 | NW_001811243.1 | + | 599854  | 599909  |
| Aae-1-1885 | NW_001811302.1 | - | 542842  | 542787  |
| Aae-1-1886 | NW_001811358.1 | - | 649852  | 649797  |
| Aae-1-1887 | NW_001811396.1 | - | 2631248 | 2631193 |
| Aae-1-1888 | NW_001811453.1 | - | 172438  | 172383  |
| Aae-1-1889 | NW_001811478.1 | + | 204025  | 204080  |
| Aae-1-1890 | NW_001811496.1 | + | 2720573 | 2720628 |
| Aae-1-1891 | NW_001811654.1 | - | 194484  | 194429  |
| Aae-1-1892 | NW_001811718.1 | - | 2516108 | 2516053 |
| Aae-1-1893 | NW_001811092.1 | - | 228814  | 228762  |
| Aae-1-1894 | NW_001811560.1 | + | 139404  | 139459  |
| Aae-1-1895 | NW_001810984.1 | - | 659257  | 659202  |
| Aae-1-1896 | NW_001810884.1 | - | 1581705 | 1581650 |
| Aae-1-1897 | NW_001811398.1 | + | 372521  | 372576  |
| Aae-1-1898 | NW_001811666.1 | - | 17560   | 17505   |
| Aae-1-1899 | NW_001810371.1 | + | 917698  | 917753  |
| Aae-1-1900 | NW_001810045.1 | - | 1803566 | 1803511 |
| Aae-1-1901 | NW_001809989.1 | - | 2114036 | 2113981 |
| Aae-1-1902 | NW_001810556.1 | - | 957197  | 957142  |
| Aae-1-1903 | NW_001810666.1 | + | 1804130 | 1804185 |
| Aae-1-1904 | NW_001811046.1 | + | 482630  | 482685  |
| Aae-1-1905 | NW_001811067.1 | - | 704484  | 704429  |
| Aae-1-1906 | NW_001811208.1 | + | 604848  | 604903  |

|            |                |   |         |         |
|------------|----------------|---|---------|---------|
| Aae-1-1907 | NW_001811362.1 | - | 281058  | 281003  |
| Aae-1-1908 | NW_001811490.1 | + | 700     | 755     |
| Aae-1-1909 | NW_001811574.1 | + | 651262  | 651317  |
| Aae-1-1910 | NW_001811607.1 | + | 884626  | 884681  |
| Aae-1-1911 | NW_001810436.1 | + | 716839  | 716894  |
| Aae-1-1912 | NW_001811165.1 | + | 964573  | 964628  |
| Aae-1-1913 | NW_001810984.1 | + | 1433824 | 1433879 |
| Aae-1-1914 | NW_001810436.1 | + | 404058  | 404113  |
| Aae-1-1915 | NW_001810040.1 | - | 19536   | 19481   |
| Aae-1-1916 | NW_001809987.1 | + | 227491  | 227546  |
| Aae-1-1917 | NW_001810178.1 | + | 253187  | 253242  |
| Aae-1-1918 | NW_001810402.1 | + | 4018    | 4073    |
| Aae-1-1919 | NW_001810784.1 | - | 1635542 | 1635487 |
| Aae-1-1920 | NW_001810805.1 | + | 131624  | 131679  |
| Aae-1-1921 | NW_001810976.1 | + | 876539  | 876594  |
| Aae-1-1922 | NW_001811040.1 | - | 1065581 | 1065526 |
| Aae-1-1923 | NW_001811150.1 | - | 830445  | 830390  |
| Aae-1-1924 | NW_001811263.1 | - | 2603088 | 2603033 |
| Aae-1-1925 | NW_001811274.1 | + | 473424  | 473479  |
| Aae-1-1926 | NW_001811521.1 | - | 136542  | 136487  |
| Aae-1-1927 | NW_001811695.1 | - | 79735   | 79680   |
| Aae-1-1928 | NW_001811786.1 | - | 69307   | 69252   |
| Aae-1-1929 | NW_001809905.1 | + | 182228  | 182283  |
| Aae-1-1930 | NW_001811696.1 | + | 1475337 | 1475392 |
| Aae-1-1931 | NW_001809802.1 | - | 184177  | 184122  |
| Aae-1-1932 | NW_001810782.1 | + | 522327  | 522382  |
| Aae-1-1933 | NW_001811023.1 | - | 672258  | 672203  |
| Aae-1-1934 | NW_001811111.1 | - | 978946  | 978891  |
| Aae-1-1935 | NW_001811174.1 | - | 2067712 | 2067657 |
| Aae-1-1936 | NW_001811307.1 | + | 1275306 | 1275361 |
| Aae-1-1937 | NW_001809836.1 | - | 2120783 | 2120728 |
| Aae-1-1938 | NW_001811191.1 | - | 767630  | 767575  |
| Aae-1-1939 | NW_001810339.1 | + | 2017175 | 2017230 |
| Aae-1-1940 | NW_001810200.1 | - | 513135  | 513080  |
| Aae-1-1941 | NW_001810381.1 | - | 980112  | 980057  |
| Aae-1-1942 | NW_001810813.1 | + | 1375093 | 1375148 |
| Aae-1-1943 | NW_001810830.1 | + | 679904  | 679959  |
| Aae-1-1944 | NW_001810994.1 | - | 1512832 | 1512777 |
| Aae-1-1945 | NW_001811362.1 | + | 332577  | 332632  |
| Aae-1-1946 | NW_001811367.1 | + | 90204   | 90259   |
| Aae-1-1947 | NW_001811295.1 | + | 675765  | 675820  |
| Aae-1-1948 | NW_001811529.1 | + | 691368  | 691423  |
| Aae-1-1949 | NW_001811546.1 | + | 216153  | 216208  |
| Aae-1-1950 | NW_001811629.1 | + | 967524  | 967579  |
| Aae-1-1951 | NW_001811668.1 | + | 383926  | 383981  |
| Aae-1-1952 | NW_001811634.1 | - | 300809  | 300754  |
| Aae-1-1953 | NW_001811351.1 | + | 1597518 | 1597573 |
| Aae-1-1954 | NW_001811396.1 | + | 1232355 | 1232410 |
| Aae-1-1955 | NW_001811562.1 | + | 2290408 | 2290463 |
| Aae-1-1956 | NW_001811501.1 | + | 69303   | 69358   |
| Aae-1-1957 | NW_001811487.1 | + | 19819   | 19874   |
| Aae-1-1958 | NW_001811530.1 | - | 247402  | 247347  |

|            |                |   |         |         |
|------------|----------------|---|---------|---------|
| Aae-1-1959 | NW_001811482.1 | - | 502624  | 502569  |
| Aae-1-1960 | NW_001811789.1 | + | 162542  | 162597  |
| Aae-1-1961 | NW_001811479.1 | - | 72866   | 72811   |
| Aae-1-1962 | NW_001811477.1 | - | 388231  | 388176  |
| Aae-1-1963 | NW_001811448.1 | + | 233527  | 233582  |
| Aae-1-1964 | NW_001811409.1 | - | 100078  | 100023  |
| Aae-1-1965 | NW_001811396.1 | + | 2218183 | 2218238 |
| Aae-1-1966 | NW_001811363.1 | + | 890484  | 890539  |
| Aae-1-1967 | NW_001811361.1 | + | 530263  | 530318  |
| Aae-1-1968 | NW_001811341.1 | - | 198770  | 198715  |
| Aae-1-1969 | NW_001811307.1 | - | 2348603 | 2348548 |
| Aae-1-1970 | NW_001811288.1 | + | 145838  | 145893  |
| Aae-1-1971 | NW_001811274.1 | + | 2205677 | 2205732 |
| Aae-1-1972 | NW_001811263.1 | + | 1388564 | 1388619 |
| Aae-1-1973 | NW_001811183.1 | - | 740434  | 740379  |
| Aae-1-1974 | NW_001811095.1 | - | 409054  | 408999  |
| Aae-1-1975 | NW_001811159.1 | + | 370432  | 370487  |
| Aae-1-1976 | NW_001809858.1 | - | 132618  | 132563  |
| Aae-1-1977 | NW_001810566.1 | + | 49749   | 49804   |
| Aae-1-1978 | NW_001811151.1 | - | 949192  | 949137  |
| Aae-1-1979 | NW_001837393.1 | + | 14151   | 14206   |
| Aae-1-1980 | NW_001810034.1 | + | 2277849 | 2277900 |
| Aae-1-1981 | NW_001811027.1 | - | 480351  | 480296  |
| Aae-1-1982 | NW_001811062.1 | - | 517920  | 517865  |
| Aae-1-1983 | NW_001810214.1 | + | 45309   | 45364   |
| Aae-1-1984 | NW_001810919.1 | - | 1684625 | 1684570 |
| Aae-1-1985 | NW_001811204.1 | + | 88451   | 88506   |
| Aae-1-1986 | NW_001810102.1 | - | 162546  | 162491  |
| Aae-1-1987 | NW_001809946.1 | + | 98371   | 98426   |
| Aae-1-1988 | NW_001809957.1 | - | 1368092 | 1368037 |
| Aae-1-1989 | NW_001810938.1 | + | 1173034 | 1173089 |
| Aae-1-1990 | NW_001810996.1 | + | 2509484 | 2509539 |
| Aae-1-1991 | NW_001811072.1 | + | 982793  | 982848  |
| Aae-1-1992 | NW_001811076.1 | - | 627958  | 627903  |
| Aae-1-1993 | NW_001810022.1 | - | 2913496 | 2913441 |
| Aae-1-1994 | NW_001811238.1 | + | 576079  | 576134  |
| Aae-1-1995 | NW_001811024.1 | + | 168770  | 168825  |
| Aae-1-1996 | NW_001811123.1 | - | 155484  | 155429  |
| Aae-1-1997 | NW_001811196.1 | + | 137462  | 137517  |
| Aae-1-1998 | NW_001811329.1 | + | 1174905 | 1174960 |
| Aae-1-1999 | NW_001811026.1 | + | 1102497 | 1102552 |
| Aae-1-2000 | NW_001811007.1 | + | 862993  | 863048  |
| Aae-1-2001 | NW_001810955.1 | + | 1012664 | 1012719 |
| Aae-1-2002 | NW_001810167.1 | + | 1563757 | 1563812 |
| Aae-1-2003 | NW_001810681.1 | + | 495353  | 495408  |
| Aae-1-2004 | NW_001810912.1 | + | 3558702 | 3558757 |
| Aae-1-2005 | NW_001810963.1 | + | 243452  | 243507  |
| Aae-1-2006 | NW_001811067.1 | + | 497467  | 497522  |
| Aae-1-2007 | NW_001811142.1 | - | 948192  | 948137  |
| Aae-1-2008 | NW_001811166.1 | - | 564924  | 564869  |
| Aae-1-2009 | NW_001811229.1 | - | 1243869 | 1243814 |
| Aae-1-2010 | NW_001809957.1 | - | 913178  | 913123  |



|            |                |   |         |         |
|------------|----------------|---|---------|---------|
| Aae-1-2011 | NW_001811450.1 | - | 303981  | 303926  |
| Aae-1-2012 | NW_001810156.1 | - | 111182  | 111127  |
| Aae-1-2013 | NW_001810537.1 | - | 1368290 | 1368235 |
| Aae-1-2014 | NW_001811104.1 | - | 421083  | 421028  |
| Aae-1-2015 | NW_001810584.1 | + | 1708726 | 1708781 |
| Aae-1-2016 | NW_001810825.1 | - | 586970  | 586915  |
| Aae-1-2017 | NW_001810133.1 | + | 910964  | 911019  |
| Aae-1-2018 | NW_001810178.1 | - | 1785272 | 1785217 |
| Aae-1-2019 | NW_001810599.1 | + | 925950  | 926005  |
| Aae-1-2020 | NW_001811043.1 | + | 852104  | 852159  |
| Aae-1-2021 | NW_001811054.1 | - | 212515  | 212460  |
| Aae-1-2022 | NW_001811140.1 | - | 323172  | 323117  |
| Aae-1-2023 | NW_001811141.1 | - | 292596  | 292541  |
| Aae-1-2024 | NW_001811183.1 | - | 543074  | 543019  |
| Aae-1-2025 | NW_001811368.1 | + | 359864  | 359919  |
| Aae-1-2026 | NW_001811426.1 | + | 139630  | 139685  |
| Aae-1-2027 | NW_001811507.1 | - | 1078853 | 1078798 |
| Aae-1-2028 | NW_001810242.1 | - | 2251301 | 2251246 |
| Aae-1-2029 | NW_001810575.1 | + | 1588515 | 1588570 |
| Aae-1-2030 | NW_001810750.1 | - | 1588941 | 1588886 |
| Aae-1-2031 | NW_001810805.1 | - | 746993  | 746938  |
| Aae-1-2032 | NW_001811144.1 | - | 463467  | 463412  |
| Aae-1-2033 | NW_001811119.1 | + | 437813  | 437868  |
| Aae-1-2034 | NW_001811118.1 | - | 1463218 | 1463163 |
| Aae-1-2035 | NW_001811105.1 | + | 900621  | 900676  |
| Aae-1-2036 | NW_001811063.1 | - | 374506  | 374451  |
| Aae-1-2037 | NW_001811052.1 | - | 756185  | 756130  |
| Aae-1-2038 | NW_001810909.1 | - | 1725499 | 1725444 |
| Aae-1-2039 | NW_001811229.1 | + | 2437061 | 2437116 |
| Aae-1-2040 | NW_001810592.1 | - | 27708   | 27653   |
| Aae-1-2041 | NW_001811183.1 | - | 447491  | 447436  |
| Aae-1-2042 | NW_001811021.1 | + | 982873  | 982930  |
| Aae-1-2043 | NW_001810214.1 | - | 75110   | 75055   |
| Aae-1-2044 | NW_001811252.1 | + | 981811  | 981866  |
| Aae-1-2045 | NW_001810982.1 | + | 1282757 | 1282812 |
| Aae-1-2046 | NW_001810275.1 | + | 853377  | 853432  |
| Aae-1-2047 | NW_001810480.1 | - | 1274283 | 1274228 |
| Aae-1-2048 | NW_001811007.1 | - | 2151805 | 2151750 |
| Aae-1-2049 | NW_001811138.1 | + | 932495  | 932550  |
| Aae-1-2050 | NW_001811155.1 | + | 280687  | 280742  |
| Aae-1-2051 | NW_001811192.1 | - | 783280  | 783225  |
| Aae-1-2052 | NW_001811195.1 | - | 833378  | 833323  |
| Aae-1-2053 | NW_001811267.1 | + | 138045  | 138100  |
| Aae-1-2054 | NW_001836061.1 | - | 5756    | 5705    |
| Aae-1-2055 | NW_001811382.1 | - | 495041  | 494986  |
| Aae-1-2056 | NW_001810923.1 | - | 523855  | 523800  |
| Aae-1-2057 | NW_001811207.1 | + | 2621864 | 2621919 |
| Aae-1-2058 | NW_001811634.1 | + | 56690   | 56745   |
| Aae-1-2059 | NW_001809876.1 | - | 15432   | 15377   |
| Aae-1-2060 | NW_001810637.1 | - | 2434298 | 2434243 |
| Aae-1-2061 | NW_001810728.1 | + | 382051  | 382106  |
| Aae-1-2062 | NW_001810954.1 | + | 611363  | 611418  |

|            |                |   |         |         |
|------------|----------------|---|---------|---------|
| Aae-1-2063 | NW_001810955.1 | + | 3682695 | 3682750 |
| Aae-1-2064 | NW_001810955.1 | - | 1803910 | 1803855 |
| Aae-1-2065 | NW_001811018.1 | - | 1853195 | 1853140 |
| Aae-1-2066 | NW_001811065.1 | - | 34873   | 34818   |
| Aae-1-2067 | NW_001810555.1 | + | 3747770 | 3747825 |
| Aae-1-2068 | NW_001810629.1 | - | 128578  | 128523  |
| Aae-1-2069 | NW_001810637.1 | - | 3464414 | 3464359 |
| Aae-1-2070 | NW_001810763.1 | - | 802634  | 802579  |
| Aae-1-2071 | NW_001810935.1 | - | 1479382 | 1479327 |
| Aae-1-2072 | NW_001811293.1 | - | 271524  | 271469  |
| Aae-1-2073 | NW_001811640.1 | + | 800524  | 800579  |
| Aae-1-2074 | NW_001811767.1 | + | 362988  | 363043  |
| Aae-1-2075 | NW_001810555.1 | + | 3598767 | 3598822 |
| Aae-1-2076 | NW_001811130.1 | - | 2756910 | 2756855 |
| Aae-1-2077 | NW_001810858.1 | + | 1484100 | 1484155 |
| Aae-1-2078 | NW_001810681.1 | - | 1170845 | 1170790 |
| Aae-1-2079 | NW_001811013.1 | + | 1061721 | 1061776 |
| Aae-1-2080 | NW_001810791.1 | - | 1200234 | 1200179 |
| Aae-1-2081 | NW_001810328.1 | + | 1486333 | 1486388 |
| Aae-1-2082 | NW_001810296.1 | + | 553826  | 553881  |
| Aae-1-2083 | NW_001810200.1 | - | 1274693 | 1274638 |
| Aae-1-2084 | NW_001809802.1 | + | 302067  | 302122  |
| Aae-1-2085 | NW_001809879.1 | + | 1916137 | 1916192 |
| Aae-1-2086 | NW_001810458.1 | - | 2652134 | 2652079 |
| Aae-1-2087 | NW_001810913.1 | - | 1543873 | 1543818 |
| Aae-1-2088 | NW_001810945.1 | + | 1399019 | 1399074 |
| Aae-1-2089 | NW_001810959.1 | + | 846064  | 846119  |
| Aae-1-2090 | NW_001811007.1 | + | 3497819 | 3497874 |
| Aae-1-2091 | NW_001811011.1 | - | 1196001 | 1195946 |
| Aae-1-2092 | NW_001811130.1 | - | 2063451 | 2063396 |
| Aae-1-2093 | NW_001811174.1 | + | 2280956 | 2281011 |
| Aae-1-2094 | NW_001811189.1 | - | 446095  | 446040  |
| Aae-1-2095 | NW_001811340.1 | + | 962898  | 962953  |
| Aae-1-2096 | NW_001811363.1 | + | 149063  | 149118  |
| Aae-1-2097 | NW_001811363.1 | + | 1165664 | 1165719 |
| Aae-1-2098 | NW_001811693.1 | - | 247848  | 247793  |
| Aae-1-2099 | NW_001810027.1 | - | 99396   | 99341   |
| Aae-1-2100 | NW_001809845.1 | + | 255183  | 255238  |
| Aae-1-2101 | NW_001810181.1 | - | 53566   | 53511   |
| Aae-1-2102 | NW_001810993.1 | + | 1255006 | 1255061 |
| Aae-1-2103 | NW_001809956.1 | + | 23212   | 23267   |
| Aae-1-2104 | NW_001809956.1 | + | 27312   | 27367   |
| Aae-1-2105 | NW_001810022.1 | - | 411622  | 411567  |
| Aae-1-2106 | NW_001810081.1 | - | 138692  | 138637  |
| Aae-1-2107 | NW_001810167.1 | - | 1563743 | 1563688 |
| Aae-1-2108 | NW_001810784.1 | + | 170625  | 170680  |
| Aae-1-2109 | NW_001810868.1 | + | 358093  | 358148  |
| Aae-1-2110 | NW_001810880.1 | + | 1560296 | 1560351 |
| Aae-1-2111 | NW_001811057.1 | + | 116931  | 116986  |
| Aae-1-2112 | NW_001811060.1 | - | 375986  | 375931  |
| Aae-1-2113 | NW_001811066.1 | + | 51181   | 51236   |
| Aae-1-2114 | NW_001811081.1 | - | 1028337 | 1028282 |

|            |                |   |         |         |
|------------|----------------|---|---------|---------|
| Aae-1-2115 | NW_001811085.1 | + | 1315490 | 1315545 |
| Aae-1-2116 | NW_001811087.1 | + | 699530  | 699585  |
| Aae-1-2117 | NW_001811139.1 | + | 943795  | 943850  |
| Aae-1-2118 | NW_001811141.1 | + | 630350  | 630405  |
| Aae-1-2119 | NW_001811178.1 | + | 539017  | 539072  |
| Aae-1-2120 | NW_001811219.1 | - | 64031   | 63976   |
| Aae-1-2121 | NW_001811220.1 | + | 319374  | 319429  |
| Aae-1-2122 | NW_001811223.1 | + | 419198  | 419253  |
| Aae-1-2123 | NW_001811244.1 | + | 688683  | 688738  |
| Aae-1-2124 | NW_001811354.1 | + | 270277  | 270332  |
| Aae-1-2125 | NW_001811600.1 | + | 85346   | 85401   |
| Aae-1-2126 | NW_001811611.1 | - | 264396  | 264341  |
| Aae-1-2127 | NW_001811793.1 | + | 290836  | 290891  |
| Aae-1-2128 | NW_001810034.1 | + | 1601118 | 1601173 |
| Aae-1-2129 | NW_001810681.1 | + | 1865417 | 1865472 |
| Aae-1-2130 | NW_001810805.1 | + | 286646  | 286701  |
| Aae-1-2131 | NW_001810868.1 | - | 1488019 | 1487964 |
| Aae-1-2132 | NW_001811005.1 | - | 1115980 | 1115925 |
| Aae-1-2133 | NW_001811131.1 | + | 7       | 62      |
| Aae-1-2134 | NW_001811301.1 | - | 6196    | 6141    |
| Aae-1-2135 | NW_001811462.1 | + | 3233418 | 3233473 |
| Aae-1-2136 | NW_001811626.1 | - | 134135  | 134080  |
| Aae-1-2137 | NW_001809946.1 | + | 2305144 | 2305199 |
| Aae-1-2138 | NW_001809902.1 | - | 43097   | 43042   |
| Aae-1-2139 | NW_001810151.1 | - | 53735   | 53680   |
| Aae-1-2140 | NW_001811136.1 | + | 1009907 | 1009962 |
| Aae-1-2141 | NW_001810342.1 | - | 53419   | 53364   |
| Aae-1-2142 | NW_001811412.1 | - | 177359  | 177304  |
| Aae-1-2143 | NW_001810637.1 | - | 208566  | 208511  |
| Aae-1-2144 | NW_001811252.1 | + | 2878279 | 2878334 |
| Aae-1-2145 | NW_001810913.1 | + | 1542531 | 1542586 |
| Aae-1-2146 | NW_001810584.1 | + | 168363  | 168418  |
| Aae-1-2147 | NW_001811098.1 | + | 541248  | 541303  |
| Aae-1-2148 | NW_001810805.1 | - | 771924  | 771869  |
| Aae-1-2149 | NW_001810970.1 | - | 3812047 | 3811992 |
| Aae-1-2150 | NW_001811480.1 | + | 367097  | 367152  |
| Aae-1-2151 | NW_001811540.1 | + | 2249591 | 2249646 |
| Aae-1-2152 | NW_001810929.1 | - | 570532  | 570477  |
| Aae-1-2153 | NW_001810045.1 | + | 1349631 | 1349686 |
| Aae-1-2154 | NW_001810350.1 | - | 810416  | 810361  |
| Aae-1-2155 | NW_001811048.1 | - | 399946  | 399891  |
| Aae-1-2156 | NW_001811277.1 | - | 163591  | 163536  |
| Aae-1-2157 | NW_001811333.1 | + | 100255  | 100310  |
| Aae-1-2158 | NW_001810231.1 | - | 970875  | 970820  |
| Aae-1-2159 | NW_001810986.1 | + | 1018748 | 1018803 |
| Aae-1-2160 | NW_001811024.1 | + | 1045829 | 1045884 |
| Aae-1-2161 | NW_001811211.1 | + | 861268  | 861323  |
| Aae-1-2162 | NW_001811739.1 | - | 1454636 | 1454581 |
| Aae-1-2163 | NW_001810328.1 | + | 1046341 | 1046396 |
| Aae-1-2164 | NW_001810508.1 | + | 81527   | 81582   |
| Aae-1-2165 | NW_001810715.1 | + | 979436  | 979491  |
| Aae-1-2166 | NW_001810721.1 | - | 191160  | 191105  |

|            |                |   |         |         |
|------------|----------------|---|---------|---------|
| Aae-1-2167 | NW_001811031.1 | - | 1300569 | 1300514 |
| Aae-1-2168 | NW_001811086.1 | + | 865083  | 865138  |
| Aae-1-2169 | NW_001811224.1 | + | 515664  | 515719  |
| Aae-1-2170 | NW_001810555.1 | + | 4152317 | 4152372 |
| Aae-1-2171 | NW_001810167.1 | + | 2276779 | 2276834 |
| Aae-1-2172 | NW_001811761.1 | - | 916575  | 916520  |
| Aae-1-2173 | NW_001810490.1 | + | 933773  | 933828  |
| Aae-1-2174 | NW_001810744.1 | - | 836195  | 836140  |
| Aae-1-2175 | NW_001810837.1 | - | 646702  | 646647  |
| Aae-1-2176 | NW_001811043.1 | + | 795961  | 796016  |
| Aae-1-2177 | NW_001811119.1 | + | 761133  | 761188  |
| Aae-1-2178 | NW_001811187.1 | - | 518133  | 518078  |
| Aae-1-2179 | NW_001811673.1 | + | 1250653 | 1250708 |
| Aae-1-2180 | NW_001810242.1 | + | 1116001 | 1116056 |
| Aae-1-2181 | NW_001810575.1 | - | 1758747 | 1758692 |
| Aae-1-2182 | NW_001811635.1 | - | 234998  | 234943  |
| Aae-1-2183 | NW_001810947.1 | - | 267946  | 267891  |
| Aae-1-2184 | NW_001810769.1 | - | 652618  | 652563  |
| Aae-1-2185 | NW_001811351.1 | - | 1924354 | 1924299 |
| Aae-1-2186 | NW_001811188.1 | - | 106872  | 106817  |
| Aae-1-2187 | NW_001811284.1 | - | 452717  | 452662  |
| Aae-1-2188 | NW_001811071.1 | - | 496880  | 496825  |
| Aae-1-2189 | NW_001811233.1 | - | 834205  | 834150  |
| Aae-1-2190 | NW_001811252.1 | + | 1662467 | 1662522 |
| Aae-1-2191 | NW_001811141.1 | - | 774700  | 774645  |
| Aae-1-2192 | NW_001811020.1 | - | 1165765 | 1165710 |
| Aae-1-2193 | NW_001811010.1 | + | 736904  | 736959  |
| Aae-1-2194 | NW_001810964.1 | - | 765848  | 765793  |
| Aae-1-2195 | NW_001810955.1 | + | 1556727 | 1556782 |
| Aae-1-2196 | NW_001810035.1 | + | 47491   | 47546   |
| Aae-1-2197 | NW_001810167.1 | + | 1404192 | 1404247 |
| Aae-1-2198 | NW_001810439.1 | - | 29739   | 29684   |
| Aae-1-2199 | NW_001811074.1 | - | 305384  | 305329  |
| Aae-1-2200 | NW_001811293.1 | + | 178531  | 178586  |
| Aae-1-2201 | NW_001811376.1 | - | 608072  | 608017  |
| Aae-1-2202 | NW_001835922.1 | + | 3867    | 3922    |
| Aae-1-2203 | NW_001810979.1 | + | 224373  | 224428  |
| Aae-1-2204 | NW_001810756.1 | - | 936662  | 936607  |
| Aae-1-2205 | NW_001810221.1 | - | 1392863 | 1392808 |
| Aae-1-2206 | NW_001811010.1 | + | 945890  | 945945  |
| Aae-1-2207 | NW_001811296.1 | + | 2023293 | 2023348 |
| Aae-1-2208 | NW_001811724.1 | + | 156558  | 156613  |
| Aae-1-2209 | NW_001811046.1 | + | 1248195 | 1248250 |
| Aae-1-2210 | NW_001810250.1 | - | 52317   | 52262   |
| Aae-1-2211 | NW_001810067.1 | - | 1000152 | 1000097 |
| Aae-1-2212 | NW_001810469.1 | + | 995910  | 995965  |
| Aae-1-2213 | NW_001811052.1 | - | 1017965 | 1017910 |
| Aae-1-2214 | NW_001810023.1 | + | 1844097 | 1844152 |
| Aae-1-2215 | NW_001809924.1 | - | 2221116 | 2221061 |
| Aae-1-2216 | NW_001811050.1 | - | 1028008 | 1027953 |
| Aae-1-2217 | NW_001811242.1 | + | 633779  | 633834  |
| Aae-1-2218 | NW_001810898.1 | - | 253043  | 252988  |

|            |                |   |         |         |
|------------|----------------|---|---------|---------|
| Aae-1-2219 | NW_001811081.1 | - | 102382  | 102327  |
| Aae-1-2220 | NW_001811215.1 | - | 298319  | 298264  |
| Aae-1-2221 | NW_001811364.1 | - | 548222  | 548167  |
| Aae-1-2222 | NW_001810425.1 | - | 1196755 | 1196700 |
| Aae-1-2223 | NW_001811044.1 | - | 184481  | 184426  |
| Aae-1-2224 | NW_001811264.1 | + | 202720  | 202775  |
| Aae-1-2225 | NW_001811342.1 | + | 661314  | 661369  |
| Aae-1-2226 | NW_001810880.1 | - | 3009044 | 3008989 |
| Aae-1-2227 | NW_001811068.1 | - | 597752  | 597697  |
| Aae-1-2228 | NW_001811085.1 | - | 91290   | 91239   |
| Aae-1-2229 | NW_001811462.1 | + | 277503  | 277554  |
| Aae-1-2230 | NW_001811141.1 | + | 1407254 | 1407309 |
| Aae-1-2231 | NW_001811252.1 | + | 2114136 | 2114191 |
| Aae-1-2232 | NW_001811399.1 | - | 62720   | 62665   |
| Aae-1-2233 | NW_001811329.1 | - | 1691238 | 1691183 |
| Aae-1-2234 | NW_001811235.1 | - | 193712  | 193657  |
| Aae-1-2235 | NW_001811233.1 | - | 679412  | 679357  |
| Aae-1-2236 | NW_001811218.1 | - | 2585698 | 2585643 |
| Aae-1-2237 | NW_001811109.1 | + | 689808  | 689863  |
| Aae-1-2238 | NW_001811096.1 | + | 1875745 | 1875800 |
| Aae-1-2239 | NW_001811010.1 | - | 1213198 | 1213143 |
| Aae-1-2240 | NW_001811191.1 | - | 659146  | 659091  |
| Aae-1-2241 | NW_001810984.1 | + | 1274466 | 1274521 |
| Aae-1-2242 | NW_001810955.1 | + | 2573524 | 2573579 |
| Aae-1-2243 | NW_001810805.1 | - | 302429  | 302374  |
| Aae-1-2244 | NW_001810118.1 | + | 130278  | 130333  |
| Aae-1-2245 | NW_001810375.1 | - | 44037   | 43982   |
| Aae-1-2246 | NW_001810947.1 | + | 279841  | 279896  |
| Aae-1-2247 | NW_001811022.1 | + | 16058   | 16113   |
| Aae-1-2248 | NW_001811085.1 | - | 1312774 | 1312719 |
| Aae-1-2249 | NW_001811248.1 | + | 205664  | 205719  |
| Aae-1-2250 | NW_001811252.1 | + | 144532  | 144587  |
| Aae-1-2251 | NW_001811369.1 | + | 373992  | 374047  |
| Aae-1-2252 | NW_001809830.1 | + | 116865  | 116920  |
| Aae-1-2253 | NW_001809913.1 | - | 229865  | 229810  |
| Aae-1-2254 | NW_001809935.1 | + | 2078364 | 2078419 |
| Aae-1-2255 | NW_001809955.1 | - | 219932  | 219877  |
| Aae-1-2256 | NW_001810022.1 | - | 3764864 | 3764809 |
| Aae-1-2257 | NW_001810339.1 | + | 1394204 | 1394259 |
| Aae-1-2258 | NW_001810637.1 | - | 2245566 | 2245511 |
| Aae-1-2259 | NW_001810791.1 | + | 878840  | 878895  |
| Aae-1-2260 | NW_001810830.1 | - | 62070   | 62015   |
| Aae-1-2261 | NW_001811063.1 | - | 3570115 | 3570060 |
| Aae-1-2262 | NW_001811114.1 | - | 27760   | 27705   |
| Aae-1-2263 | NW_001811196.1 | + | 1302552 | 1302607 |
| Aae-1-2264 | NW_001811209.1 | + | 428332  | 428387  |
| Aae-1-2265 | NW_001811226.1 | - | 495979  | 495924  |
| Aae-1-2266 | NW_001811327.1 | + | 291934  | 291989  |
| Aae-1-2267 | NW_001811607.1 | + | 1270293 | 1270348 |
| Aae-1-2268 | NW_001811772.1 | + | 2237735 | 2237790 |
| Aae-1-2269 | NW_001836155.1 | - | 3805    | 3750    |
| Aae-1-2270 | NW_001809968.1 | - | 2339913 | 2339858 |

|            |                |   |         |         |
|------------|----------------|---|---------|---------|
| Aae-1-2271 | NW_001811385.1 | - | 1101709 | 1101654 |
| Aae-1-2272 | NW_001810133.1 | - | 1191725 | 1191670 |
| Aae-1-2273 | NW_001810556.1 | - | 1529321 | 1529266 |
| Aae-1-2274 | NW_001810975.1 | + | 883283  | 883338  |
| Aae-1-2275 | NW_001811363.1 | - | 1165395 | 1165340 |
| Aae-1-2276 | NW_001811385.1 | + | 1534876 | 1534931 |
| Aae-1-2277 | NW_001811351.1 | - | 1913607 | 1913552 |
| Aae-1-2278 | NW_001811341.1 | - | 419308  | 419253  |
| Aae-1-2279 | NW_001811326.1 | + | 171232  | 171287  |
| Aae-1-2280 | NW_001811105.1 | - | 96822   | 96767   |
| Aae-1-2281 | NW_001811037.1 | - | 73702   | 73647   |
| Aae-1-2282 | NW_001811032.1 | + | 920940  | 920995  |
| Aae-1-2283 | NW_001811618.1 | - | 856996  | 856941  |
| Aae-1-2284 | NW_001810939.1 | + | 769960  | 770015  |
| Aae-1-2285 | NW_001811007.1 | - | 2797670 | 2797615 |
| Aae-1-2286 | NW_001811016.1 | + | 35998   | 36053   |
| Aae-1-2287 | NW_001811003.1 | + | 137105  | 137160  |
| Aae-1-2288 | NW_001810962.1 | - | 975359  | 975304  |
| Aae-1-2289 | NW_001811050.1 | + | 1110733 | 1110788 |
| Aae-1-2290 | NW_001811585.1 | - | 2641622 | 2641567 |
| Aae-1-2291 | NW_001811718.1 | + | 2147201 | 2147256 |
| Aae-1-2292 | NW_001811061.1 | + | 1008190 | 1008245 |
| Aae-1-2293 | NW_001810133.1 | - | 291300  | 291245  |
| Aae-1-2294 | NW_001810984.1 | - | 3466609 | 3466554 |
| Aae-1-2295 | NW_001810045.1 | - | 2032008 | 2031953 |
| Aae-1-2296 | NW_001810458.1 | + | 3029584 | 3029639 |
| Aae-1-2297 | NW_001810696.1 | + | 949258  | 949313  |
| Aae-1-2298 | NW_001810852.1 | - | 1325276 | 1325221 |
| Aae-1-2299 | NW_001811047.1 | + | 1052901 | 1052956 |
| Aae-1-2300 | NW_001810575.1 | - | 1361234 | 1361179 |
| Aae-1-2301 | NW_001810783.1 | - | 591999  | 591944  |
| Aae-1-2302 | NW_001810962.1 | + | 635976  | 636031  |
| Aae-1-2303 | NW_001811215.1 | + | 749711  | 749766  |
| Aae-1-2304 | NW_001811369.1 | + | 178365  | 178420  |
| Aae-1-2305 | NW_001810666.1 | + | 1447961 | 1448016 |
| Aae-1-2306 | NW_001809957.1 | - | 910361  | 910306  |
| Aae-1-2307 | NW_001810937.1 | + | 3702332 | 3702387 |
| Aae-1-2308 | NW_001811163.1 | + | 214112  | 214167  |
| Aae-1-2309 | NW_001809893.1 | - | 148866  | 148811  |
| Aae-1-2310 | NW_001810763.1 | - | 849863  | 849808  |
| Aae-1-2311 | NW_001810955.1 | - | 2374111 | 2374056 |
| Aae-1-2312 | NW_001809823.1 | + | 172749  | 172804  |
| Aae-1-2313 | NW_001810169.1 | - | 36051   | 35996   |
| Aae-1-2314 | NW_001811318.1 | - | 1551507 | 1551452 |
| Aae-1-2315 | NW_001811528.1 | + | 319544  | 319599  |
| Aae-1-2316 | NW_001809802.1 | + | 1078139 | 1078194 |
| Aae-1-2317 | NW_001809805.1 | - | 188567  | 188512  |
| Aae-1-2318 | NW_001809836.1 | + | 1420798 | 1420853 |
| Aae-1-2319 | NW_001809847.1 | - | 5191    | 5136    |
| Aae-1-2320 | NW_001809873.1 | - | 255784  | 255729  |
| Aae-1-2321 | NW_001809968.1 | - | 908220  | 908165  |
| Aae-1-2322 | NW_001810005.1 | - | 137870  | 137815  |

|            |                |   |         |         |
|------------|----------------|---|---------|---------|
| Aae-1-2323 | NW_001810022.1 | - | 2479749 | 2479694 |
| Aae-1-2324 | NW_001810111.1 | + | 1567606 | 1567661 |
| Aae-1-2325 | NW_001810133.1 | - | 1292256 | 1292201 |
| Aae-1-2326 | NW_001810189.1 | - | 2230992 | 2230937 |
| Aae-1-2327 | NW_001810207.1 | - | 96091   | 96036   |
| Aae-1-2328 | NW_001810231.1 | - | 798997  | 798942  |
| Aae-1-2329 | NW_001810351.1 | + | 1563356 | 1563411 |
| Aae-1-2330 | NW_001810351.1 | + | 2020170 | 2020225 |
| Aae-1-2331 | NW_001810356.1 | + | 31298   | 31353   |
| Aae-1-2332 | NW_001810371.1 | + | 535946  | 536001  |
| Aae-1-2333 | NW_001810371.1 | + | 1672347 | 1672402 |
| Aae-1-2334 | NW_001810371.1 | - | 535287  | 535232  |
| Aae-1-2335 | NW_001810403.1 | - | 743762  | 743707  |
| Aae-1-2336 | NW_001810556.1 | - | 38945   | 38890   |
| Aae-1-2337 | NW_001810686.1 | + | 9064    | 9119    |
| Aae-1-2338 | NW_001810728.1 | + | 644615  | 644670  |
| Aae-1-2339 | NW_001810728.1 | + | 1679998 | 1680053 |
| Aae-1-2340 | NW_001810782.1 | + | 3552808 | 3552863 |
| Aae-1-2341 | NW_001810791.1 | + | 804279  | 804334  |
| Aae-1-2342 | NW_001810868.1 | - | 564928  | 564873  |
| Aae-1-2343 | NW_001810912.1 | + | 3044508 | 3044563 |
| Aae-1-2344 | NW_001810916.1 | + | 977904  | 977959  |
| Aae-1-2345 | NW_001810935.1 | + | 225923  | 225978  |
| Aae-1-2346 | NW_001810955.1 | + | 2362763 | 2362818 |
| Aae-1-2347 | NW_001810966.1 | + | 1205420 | 1205475 |
| Aae-1-2348 | NW_001810975.1 | + | 529540  | 529595  |
| Aae-1-2349 | NW_001810996.1 | - | 1411846 | 1411791 |
| Aae-1-2350 | NW_001811003.1 | + | 1214658 | 1214713 |
| Aae-1-2351 | NW_001811005.1 | - | 129414  | 129359  |
| Aae-1-2352 | NW_001811012.1 | - | 1388544 | 1388489 |
| Aae-1-2353 | NW_001811031.1 | + | 216975  | 217030  |
| Aae-1-2354 | NW_001811031.1 | + | 868924  | 868979  |
| Aae-1-2355 | NW_001811049.1 | + | 956455  | 956510  |
| Aae-1-2356 | NW_001811061.1 | + | 582599  | 582654  |
| Aae-1-2357 | NW_001811086.1 | + | 234929  | 234984  |
| Aae-1-2358 | NW_001811086.1 | + | 947654  | 947709  |
| Aae-1-2359 | NW_001811089.1 | + | 969892  | 969947  |
| Aae-1-2360 | NW_001811099.1 | - | 115098  | 115043  |
| Aae-1-2361 | NW_001811119.1 | - | 142597  | 142542  |
| Aae-1-2362 | NW_001811136.1 | + | 234103  | 234158  |
| Aae-1-2363 | NW_001811141.1 | - | 2195648 | 2195593 |
| Aae-1-2364 | NW_001811152.1 | - | 3084168 | 3084113 |
| Aae-1-2365 | NW_001811157.1 | - | 572375  | 572320  |
| Aae-1-2366 | NW_001811162.1 | + | 324751  | 324806  |
| Aae-1-2367 | NW_001811184.1 | - | 554635  | 554580  |
| Aae-1-2368 | NW_001811185.1 | + | 1844414 | 1844469 |
| Aae-1-2369 | NW_001811185.1 | - | 1843085 | 1843030 |
| Aae-1-2370 | NW_001811187.1 | + | 660707  | 660762  |
| Aae-1-2371 | NW_001811196.1 | + | 1883407 | 1883462 |
| Aae-1-2372 | NW_001811218.1 | + | 661114  | 661169  |
| Aae-1-2373 | NW_001811238.1 | - | 549945  | 549890  |
| Aae-1-2374 | NW_001811252.1 | + | 2934896 | 2934951 |

|            |                |   |         |         |
|------------|----------------|---|---------|---------|
| Aae-1-2375 | NW_001811272.1 | + | 731384  | 731439  |
| Aae-1-2376 | NW_001811326.1 | - | 18645   | 18590   |
| Aae-1-2377 | NW_001811351.1 | + | 1913637 | 1913692 |
| Aae-1-2378 | NW_001811379.1 | - | 217028  | 216973  |
| Aae-1-2379 | NW_001811385.1 | + | 928875  | 928930  |
| Aae-1-2380 | NW_001811418.1 | + | 2909266 | 2909321 |
| Aae-1-2381 | NW_001811443.1 | - | 248464  | 248409  |
| Aae-1-2382 | NW_001811462.1 | - | 596685  | 596630  |
| Aae-1-2383 | NW_001811463.1 | - | 610484  | 610429  |
| Aae-1-2384 | NW_001811488.1 | + | 378420  | 378475  |
| Aae-1-2385 | NW_001811546.1 | + | 357305  | 357360  |
| Aae-1-2386 | NW_001811579.1 | + | 347336  | 347391  |
| Aae-1-2387 | NW_001811598.1 | - | 185808  | 185753  |
| Aae-1-2388 | NW_001811609.1 | + | 252695  | 252750  |
| Aae-1-2389 | NW_001811629.1 | + | 1883695 | 1883750 |
| Aae-1-2390 | NW_001811647.1 | - | 416643  | 416588  |
| Aae-1-2391 | NW_001811686.1 | + | 287582  | 287637  |
| Aae-1-2392 | NW_001811692.1 | + | 137151  | 137206  |
| Aae-1-2393 | NW_001811743.1 | - | 261104  | 261049  |
| Aae-1-2394 | NW_001836439.1 | + | 2190    | 2245    |
| Aae-1-2395 | NW_001837394.1 | - | 742     | 687     |
| Aae-1-2396 | NW_001809803.1 | - | 1639233 | 1639178 |
| Aae-1-2397 | NW_001811311.1 | - | 762672  | 762617  |
| Aae-1-2398 | NW_001811406.1 | - | 368039  | 367984  |
| Aae-1-2399 | NW_001811483.1 | + | 337265  | 337320  |
| Aae-1-2400 | NW_001811130.1 | - | 578537  | 578482  |
| Aae-1-2401 | NW_001811618.1 | - | 1351207 | 1351152 |
| Aae-1-2402 | NW_001811662.1 | - | 1629973 | 1629918 |
| Aae-1-2403 | NW_001811714.1 | + | 302365  | 302420  |
| Aae-1-2404 | NW_001811789.1 | - | 257040  | 256985  |
| Aae-1-2405 | NW_001811757.1 | + | 129715  | 129770  |
| Aae-1-2406 | NW_001811684.1 | + | 4225219 | 4225274 |
| Aae-1-2407 | NW_001811662.1 | - | 2444405 | 2444350 |
| Aae-1-2408 | NW_001811640.1 | + | 1241412 | 1241467 |
| Aae-1-2409 | NW_001811618.1 | + | 780452  | 780507  |
| Aae-1-2410 | NW_001811562.1 | - | 2244471 | 2244416 |
| Aae-1-2411 | NW_001811513.1 | - | 4114    | 4059    |
| Aae-1-2412 | NW_001811462.1 | - | 2659242 | 2659187 |
| Aae-1-2413 | NW_001811418.1 | - | 2570172 | 2570117 |
| Aae-1-2414 | NW_001811507.1 | - | 1280595 | 1280540 |
| Aae-1-2415 | NW_001811454.1 | + | 595403  | 595458  |
| Aae-1-2416 | NW_001811398.1 | - | 353101  | 353046  |
| Aae-1-2417 | NW_001811209.1 | + | 377187  | 377242  |
| Aae-1-2418 | NW_001811238.1 | - | 876160  | 876105  |
| Aae-1-2419 | NW_001811344.1 | + | 359220  | 359275  |
| Aae-1-2420 | NW_001811314.1 | - | 537241  | 537186  |
| Aae-1-2421 | NW_001811307.1 | + | 3045855 | 3045910 |
| Aae-1-2422 | NW_001811274.1 | + | 595852  | 595907  |
| Aae-1-2423 | NW_001811263.1 | + | 2519555 | 2519610 |
| Aae-1-2424 | NW_001811433.1 | + | 54667   | 54722   |
| Aae-1-2425 | NW_001811258.1 | + | 275744  | 275799  |
| Aae-1-2426 | NW_001811258.1 | + | 285980  | 286035  |



|            |                |   |         |         |
|------------|----------------|---|---------|---------|
| Aae-1-2427 | NW_001811003.1 | - | 1239908 | 1239853 |
| Aae-1-2428 | NW_001811191.1 | - | 637850  | 637795  |
| Aae-1-2429 | NW_001811225.1 | + | 364131  | 364186  |
| Aae-1-2430 | NW_001811246.1 | - | 181604  | 181549  |
| Aae-1-2431 | NW_001811242.1 | + | 308600  | 308655  |
| Aae-1-2432 | NW_001811269.1 | + | 478560  | 478615  |
| Aae-1-2433 | NW_001811690.1 | - | 204511  | 204456  |
| Aae-1-2434 | NW_001811207.1 | - | 2865612 | 2865557 |
| Aae-1-2435 | NW_001811393.1 | + | 76045   | 76100   |
| Aae-1-2436 | NW_001811236.1 | + | 193602  | 193657  |
| Aae-1-2437 | NW_001811225.1 | + | 436003  | 436058  |
| Aae-1-2438 | NW_001811189.1 | - | 821966  | 821911  |
| Aae-1-2439 | NW_001811185.1 | - | 1761388 | 1761333 |
| Aae-1-2440 | NW_001811142.1 | - | 958012  | 957957  |
| Aae-1-2441 | NW_001811067.1 | - | 123636  | 123581  |
| Aae-1-2442 | NW_001811032.1 | - | 126068  | 126013  |
| Aae-1-2443 | NW_001810221.1 | + | 1431823 | 1431878 |
| Aae-1-2444 | NW_001810556.1 | + | 452091  | 452146  |
| Aae-1-2445 | NW_001810929.1 | - | 1391284 | 1391229 |
| Aae-1-2446 | NW_001811118.1 | + | 164977  | 165032  |
| Aae-1-2447 | NW_001811351.1 | - | 2171380 | 2171325 |
| Aae-1-2448 | NW_001810242.1 | - | 1151540 | 1151485 |
| Aae-1-2449 | NW_001811233.1 | - | 110097  | 110042  |
| Aae-1-2450 | NW_001811240.1 | + | 465589  | 465644  |
| Aae-1-2451 | NW_001811060.1 | + | 828114  | 828169  |
| Aae-1-2452 | NW_001811050.1 | + | 732564  | 732619  |
| Aae-1-2453 | NW_001810000.1 | - | 1017071 | 1017016 |
| Aae-1-2454 | NW_001811626.1 | - | 467121  | 467066  |
| Aae-1-2455 | NW_001810133.1 | + | 3647222 | 3647277 |
| Aae-1-2456 | NW_001810584.1 | + | 966538  | 966593  |
| Aae-1-2457 | NW_001810490.1 | + | 193075  | 193130  |
| Aae-1-2458 | NW_001811023.1 | - | 616102  | 616047  |
| Aae-1-2459 | NW_001811041.1 | - | 1814759 | 1814704 |
| Aae-1-2460 | NW_001811551.1 | + | 671613  | 671668  |
| Aae-1-2461 | NW_001809879.1 | + | 1866311 | 1866366 |
| Aae-1-2462 | NW_001809879.1 | - | 2315615 | 2315560 |
| Aae-1-2463 | NW_001809979.1 | - | 2433635 | 2433580 |
| Aae-1-2464 | NW_001810264.1 | + | 1226349 | 1226404 |
| Aae-1-2465 | NW_001810480.1 | + | 242679  | 242734  |
| Aae-1-2466 | NW_001810566.1 | + | 42      | 97      |
| Aae-1-2467 | NW_001810959.1 | + | 655565  | 655620  |
| Aae-1-2468 | NW_001811014.1 | + | 324285  | 324340  |
| Aae-1-2469 | NW_001811059.1 | + | 641916  | 641971  |
| Aae-1-2470 | NW_001811071.1 | - | 985439  | 985384  |
| Aae-1-2471 | NW_001811089.1 | + | 681818  | 681873  |
| Aae-1-2472 | NW_001811127.1 | + | 313591  | 313646  |
| Aae-1-2473 | NW_001811218.1 | - | 1238340 | 1238285 |
| Aae-1-2474 | NW_001811366.1 | + | 10897   | 10952   |
| Aae-1-2475 | NW_001811518.1 | - | 1736023 | 1735968 |
| Aae-1-2476 | NW_001811551.1 | + | 2758887 | 2758942 |
| Aae-1-2477 | NW_001810111.1 | - | 1196543 | 1196484 |
| Aae-1-2478 | NW_001810022.1 | + | 3500167 | 3500222 |

|            |                |   |         |         |
|------------|----------------|---|---------|---------|
| Aae-1-2479 | NW_001810962.1 | + | 870173  | 870228  |
| Aae-1-2480 | NW_001811290.1 | + | 750577  | 750632  |
| Aae-1-2481 | NW_001810458.1 | - | 4190054 | 4189999 |
| Aae-1-2482 | NW_001810714.1 | - | 2180329 | 2180274 |
| Aae-1-2483 | NW_001810989.1 | + | 206472  | 206527  |
| Aae-1-2484 | NW_001810998.1 | + | 60315   | 60370   |
| Aae-1-2485 | NW_001811201.1 | - | 639023  | 638968  |
| Aae-1-2486 | NW_001811242.1 | + | 467263  | 467318  |
| Aae-1-2487 | NW_001811282.1 | + | 495578  | 495633  |
| Aae-1-2488 | NW_001811316.1 | + | 258150  | 258205  |
| Aae-1-2489 | NW_001811336.1 | + | 772665  | 772720  |
| Aae-1-2490 | NW_001811351.1 | - | 2734175 | 2734120 |
| Aae-1-2491 | NW_001811352.1 | + | 1994875 | 1994930 |
| Aae-1-2492 | NW_001811377.1 | - | 518708  | 518653  |
| Aae-1-2493 | NW_001811462.1 | - | 3158218 | 3158163 |
| Aae-1-2494 | NW_001811684.1 | + | 2357828 | 2357883 |
| Aae-1-2495 | NW_001836144.1 | - | 2211    | 2156    |
| Aae-1-2496 | NW_001810629.1 | + | 1782510 | 1782565 |
| Aae-1-2497 | NW_001810744.1 | - | 772582  | 772527  |
| Aae-1-2498 | NW_001810888.1 | - | 1445392 | 1445337 |
| Aae-1-2499 | NW_001811091.1 | - | 342786  | 342731  |
| Aae-1-2500 | NW_001810913.1 | - | 310433  | 310378  |
| Aae-1-2501 | NW_001811169.1 | - | 448395  | 448340  |
| Aae-1-2502 | NW_001810888.1 | + | 839581  | 839636  |
| Aae-1-2503 | NW_001810838.1 | - | 779648  | 779593  |
| Aae-1-2504 | NW_001810838.1 | + | 1218489 | 1218544 |
| Aae-1-2505 | NW_001811237.1 | + | 350683  | 350738  |
| Aae-1-2506 | NW_001810519.1 | - | 1726080 | 1726025 |
| Aae-1-2507 | NW_001810847.1 | - | 1208837 | 1208782 |
| Aae-1-2508 | NW_001810547.1 | - | 1816728 | 1816673 |
| Aae-1-2509 | NW_001809957.1 | + | 1098051 | 1098106 |
| Aae-1-2510 | NW_001810211.1 | + | 2144399 | 2144454 |
| Aae-1-2511 | NW_001809968.1 | + | 1597433 | 1597488 |
| Aae-1-2512 | NW_001810145.1 | - | 491528  | 491473  |
| Aae-1-2513 | NW_001810782.1 | - | 3192216 | 3192161 |
| Aae-1-2514 | NW_001811375.1 | + | 387639  | 387694  |
| Aae-1-2515 | NW_001811375.1 | + | 393812  | 393867  |
| Aae-1-2516 | NW_001835343.1 | + | 5104    | 5159    |
| Aae-1-2517 | NW_001809890.1 | - | 952006  | 951951  |
| Aae-1-2518 | NW_001809814.1 | - | 2756370 | 2756315 |
| Aae-1-2519 | NW_001811107.1 | + | 1581867 | 1581922 |
| Aae-1-2520 | NW_001809935.1 | + | 2518528 | 2518583 |
| Aae-1-2521 | NW_001810111.1 | + | 2048930 | 2048985 |
| Aae-1-2522 | NW_001811696.1 | - | 2539452 | 2539397 |
| Aae-1-2523 | NW_001810034.1 | + | 6953    | 7008    |
| Aae-1-2524 | NW_001836748.1 | - | 2133    | 2078    |
| Aae-1-2525 | NW_001809890.1 | + | 38140   | 38195   |
| Aae-1-2526 | NW_001810178.1 | - | 975248  | 975193  |
| Aae-1-2527 | NW_001810133.1 | - | 3374353 | 3374298 |
| Aae-1-2528 | NW_001809979.1 | + | 417423  | 417478  |
| Aae-1-2529 | NW_001811363.1 | - | 1435967 | 1435912 |
| Aae-1-2530 | NW_001809862.1 | + | 49333   | 49388   |

|            |                |   |         |         |
|------------|----------------|---|---------|---------|
| Aae-1-2531 | NW_001810459.1 | + | 1464582 | 1464637 |
| Aae-1-2532 | NW_001810555.1 | - | 602184  | 602129  |
| Aae-1-2533 | NW_001810637.1 | - | 2504654 | 2504599 |
| Aae-1-2534 | NW_001810666.1 | + | 468631  | 468686  |
| Aae-1-2535 | NW_001810681.1 | + | 584831  | 584886  |
| Aae-1-2536 | NW_001810714.1 | + | 1224921 | 1224976 |
| Aae-1-2537 | NW_001810872.1 | - | 926057  | 926002  |
| Aae-1-2538 | NW_001810881.1 | + | 234702  | 234757  |
| Aae-1-2539 | NW_001810966.1 | + | 688846  | 688901  |
| Aae-1-2540 | NW_001810977.1 | + | 833354  | 833409  |
| Aae-1-2541 | NW_001811020.1 | - | 317182  | 317127  |
| Aae-1-2542 | NW_001811055.1 | + | 599986  | 600041  |
| Aae-1-2543 | NW_001811072.1 | + | 1276205 | 1276260 |
| Aae-1-2544 | NW_001811092.1 | - | 251234  | 251179  |
| Aae-1-2545 | NW_001811221.1 | - | 703777  | 703722  |
| Aae-1-2546 | NW_001811351.1 | - | 5030968 | 5030913 |
| Aae-1-2547 | NW_001811354.1 | - | 714819  | 714764  |
| Aae-1-2548 | NW_001811450.1 | - | 480449  | 480394  |
| Aae-1-2549 | NW_001811529.1 | - | 1840762 | 1840707 |
| Aae-1-2550 | NW_001811565.1 | - | 177963  | 177908  |
| Aae-1-2551 | NW_001811698.1 | - | 119331  | 119276  |
| Aae-1-2552 | NW_001809879.1 | + | 857417  | 857472  |
| Aae-1-2553 | NW_001810022.1 | - | 2990012 | 2989957 |
| Aae-1-2554 | NW_001810414.1 | + | 353690  | 353745  |
| Aae-1-2555 | NW_001810011.1 | - | 1444610 | 1444555 |
| Aae-1-2556 | NW_001810156.1 | - | 1843759 | 1843704 |
| Aae-1-2557 | NW_001810219.1 | + | 110553  | 110608  |
| Aae-1-2558 | NW_001810623.1 | - | 847636  | 847581  |
| Aae-1-2559 | NW_001810638.1 | - | 356606  | 356551  |
| Aae-1-2560 | NW_001810837.1 | - | 2529788 | 2529733 |
| Aae-1-2561 | NW_001810905.1 | + | 775823  | 775878  |
| Aae-1-2562 | NW_001810929.1 | + | 150978  | 151033  |
| Aae-1-2563 | NW_001810955.1 | + | 845230  | 845285  |
| Aae-1-2564 | NW_001810994.1 | - | 532841  | 532786  |
| Aae-1-2565 | NW_001811009.1 | + | 775743  | 775798  |
| Aae-1-2566 | NW_001811019.1 | - | 2874175 | 2874120 |
| Aae-1-2567 | NW_001811033.1 | - | 40489   | 40434   |
| Aae-1-2568 | NW_001811093.1 | + | 628933  | 628988  |
| Aae-1-2569 | NW_001811121.1 | - | 161198  | 161143  |
| Aae-1-2570 | NW_001811130.1 | + | 2638209 | 2638264 |
| Aae-1-2571 | NW_001811130.1 | + | 3134582 | 3134637 |
| Aae-1-2572 | NW_001811204.1 | - | 464324  | 464269  |
| Aae-1-2573 | NW_001811252.1 | + | 2167813 | 2167868 |
| Aae-1-2574 | NW_001811307.1 | + | 2117711 | 2117766 |
| Aae-1-2575 | NW_001811407.1 | - | 2331745 | 2331690 |
| Aae-1-2576 | NW_001836765.1 | - | 5407    | 5352    |
| Aae-1-2577 | NW_001810283.1 | - | 118607  | 118552  |
| Aae-1-2578 | NW_001810637.1 | + | 4046007 | 4046062 |
| Aae-1-2579 | NW_001811038.1 | + | 65230   | 65285   |
| Aae-1-2580 | NW_001811207.1 | + | 2166822 | 2166877 |
| Aae-1-2581 | NW_001810458.1 | + | 662943  | 662998  |
| Aae-1-2582 | NW_001811118.1 | - | 2955412 | 2955357 |

|            |                |   |         |         |
|------------|----------------|---|---------|---------|
| Aae-1-2583 | NW_001811618.1 | - | 119058  | 119003  |
| Aae-1-2584 | NW_001811409.1 | + | 611558  | 611613  |
| Aae-1-2585 | NW_001811151.1 | + | 499528  | 499583  |
| Aae-1-2586 | NW_001811151.1 | - | 499372  | 499317  |
| Aae-1-2587 | NW_001811131.1 | - | 1097948 | 1097893 |
| Aae-1-2588 | NW_001811089.1 | - | 471140  | 471085  |
| Aae-1-2589 | NW_001811749.1 | + | 7921    | 7976    |
| Aae-1-2590 | NW_001811060.1 | - | 287513  | 287458  |
| Aae-1-2591 | NW_001810231.1 | - | 1071913 | 1071858 |
| Aae-1-2592 | NW_001811094.1 | + | 954500  | 954555  |
| Aae-1-2593 | NW_001810111.1 | + | 832966  | 833021  |
| Aae-1-2594 | NW_001810286.1 | + | 275647  | 275702  |
| Aae-1-2595 | NW_001810508.1 | + | 577791  | 577846  |
| Aae-1-2596 | NW_001810791.1 | - | 802182  | 802127  |
| Aae-1-2597 | NW_001810825.1 | - | 536507  | 536452  |
| Aae-1-2598 | NW_001810990.1 | + | 849808  | 849863  |
| Aae-1-2599 | NW_001811023.1 | - | 431262  | 431207  |
| Aae-1-2600 | NW_001811123.1 | - | 1129653 | 1129598 |
| Aae-1-2601 | NW_001811163.1 | - | 331552  | 331497  |
| Aae-1-2602 | NW_001811193.1 | + | 826893  | 826948  |
| Aae-1-2603 | NW_001811228.1 | + | 575092  | 575147  |
| Aae-1-2604 | NW_001811258.1 | + | 553397  | 553452  |
| Aae-1-2605 | NW_001811307.1 | + | 3014510 | 3014565 |
| Aae-1-2606 | NW_001811349.1 | - | 92315   | 92260   |
| Aae-1-2607 | NW_001811409.1 | + | 513689  | 513744  |
| Aae-1-2608 | NW_001811415.1 | - | 136750  | 136695  |
| Aae-1-2609 | NW_001811462.1 | + | 3138205 | 3138260 |
| Aae-1-2610 | NW_001811475.1 | + | 76979   | 77034   |
| Aae-1-2611 | NW_001811183.1 | - | 693148  | 693093  |
| Aae-1-2612 | NW_001811493.1 | - | 417174  | 417119  |
| Aae-1-2613 | NW_001811507.1 | + | 1016314 | 1016369 |
| Aae-1-2614 | NW_001811540.1 | + | 1019650 | 1019705 |
| Aae-1-2615 | NW_001811534.1 | + | 110929  | 110984  |
| Aae-1-2616 | NW_001811495.1 | - | 134170  | 134115  |
| Aae-1-2617 | NW_001811456.1 | + | 382002  | 382057  |
| Aae-1-2618 | NW_001811351.1 | + | 1846207 | 1846262 |
| Aae-1-2619 | NW_001811317.1 | - | 617230  | 617175  |
| Aae-1-2620 | NW_001810955.1 | + | 2956260 | 2956315 |
| Aae-1-2621 | NW_001810853.1 | + | 36790   | 36845   |
| Aae-1-2622 | NW_001811234.1 | - | 279454  | 279399  |
| Aae-1-2623 | NW_001810987.1 | - | 877854  | 877799  |
| Aae-1-2624 | NW_001811118.1 | - | 1572539 | 1572484 |
| Aae-1-2625 | NW_001811296.1 | - | 878607  | 878552  |
| Aae-1-2626 | NW_001810912.1 | + | 2111586 | 2111641 |
| Aae-1-2627 | NW_001811049.1 | + | 704262  | 704317  |
| Aae-1-2628 | NW_001811048.1 | + | 1075796 | 1075851 |
| Aae-1-2629 | NW_001811037.1 | - | 141667  | 141612  |
| Aae-1-2630 | NW_001811030.1 | + | 1590087 | 1590142 |
| Aae-1-2631 | NW_001811083.1 | - | 135116  | 135061  |
| Aae-1-2632 | NW_001810962.1 | - | 645406  | 645351  |
| Aae-1-2633 | NW_001811071.1 | - | 556438  | 556383  |
| Aae-1-2634 | NW_001811230.1 | + | 481379  | 481434  |

|            |                |   |         |         |
|------------|----------------|---|---------|---------|
| Aae-1-2635 | NW_001810022.1 | - | 3929345 | 3929290 |
| Aae-1-2636 | NW_001810868.1 | - | 259652  | 259597  |
| Aae-1-2637 | NW_001809912.1 | + | 663486  | 663541  |
| Aae-1-2638 | NW_001810011.1 | - | 1563953 | 1563898 |
| Aae-1-2639 | NW_001810022.1 | - | 3967314 | 3967259 |
| Aae-1-2640 | NW_001810782.1 | + | 4848375 | 4848430 |
| Aae-1-2641 | NW_001811131.1 | - | 833515  | 833460  |
| Aae-1-2642 | NW_001811240.1 | + | 4950596 | 4950651 |
| Aae-1-2643 | NW_001811263.1 | + | 668227  | 668282  |
| Aae-1-2644 | NW_001809820.1 | - | 207019  | 206964  |
| Aae-1-2645 | NW_001809887.1 | + | 50114   | 50169   |
| Aae-1-2646 | NW_001810339.1 | + | 1196409 | 1196464 |
| Aae-1-2647 | NW_001810791.1 | + | 1105373 | 1105428 |
| Aae-1-2648 | NW_001811017.1 | + | 179203  | 179258  |
| Aae-1-2649 | NW_001809822.1 | + | 81763   | 81818   |
| Aae-1-2650 | NW_001809879.1 | + | 618259  | 618314  |
| Aae-1-2651 | NW_001809935.1 | + | 194147  | 194202  |
| Aae-1-2652 | NW_001810067.1 | - | 1580594 | 1580539 |
| Aae-1-2653 | NW_001810436.1 | + | 1634838 | 1634893 |
| Aae-1-2654 | NW_001810974.1 | - | 1327527 | 1327472 |
| Aae-1-2655 | NW_001810984.1 | - | 1752379 | 1752324 |
| Aae-1-2656 | NW_001810985.1 | + | 1308237 | 1308292 |
| Aae-1-2657 | NW_001811055.1 | - | 47241   | 47186   |
| Aae-1-2658 | NW_001811129.1 | - | 2200695 | 2200640 |
| Aae-1-2659 | NW_001811166.1 | + | 351057  | 351112  |
| Aae-1-2660 | NW_001811218.1 | + | 1328314 | 1328369 |
| Aae-1-2661 | NW_001811317.1 | + | 387970  | 388025  |
| Aae-1-2662 | NW_001811363.1 | + | 1051417 | 1051472 |
| Aae-1-2663 | NW_001811374.1 | + | 2633793 | 2633848 |
| Aae-1-2664 | NW_001811420.1 | - | 242523  | 242468  |
| Aae-1-2665 | NW_001811440.1 | + | 2619003 | 2619058 |
| Aae-1-2666 | NW_001837424.1 | + | 31      | 86      |
| Aae-1-2667 | NW_001810813.1 | - | 1009461 | 1009406 |
| Aae-1-2668 | NW_001810881.1 | - | 280666  | 280611  |
| Aae-1-2669 | NW_001810508.1 | - | 1313174 | 1313119 |
| Aae-1-2670 | NW_001811650.1 | - | 358111  | 358056  |
| Aae-1-2671 | NW_001810242.1 | - | 3549700 | 3549645 |
| Aae-1-2672 | NW_001809801.1 | + | 2779367 | 2779422 |
| Aae-1-2673 | NW_001811227.1 | + | 754464  | 754519  |
| Aae-1-2674 | NW_001809950.1 | - | 54446   | 54391   |
| Aae-1-2675 | NW_001810708.1 | - | 1095176 | 1095121 |
| Aae-1-2676 | NW_001810997.1 | + | 28129   | 28184   |
| Aae-1-2677 | NW_001811027.1 | - | 643580  | 643525  |
| Aae-1-2678 | NW_001811240.1 | - | 4594018 | 4593963 |
| Aae-1-2679 | NW_001811274.1 | + | 2015231 | 2015286 |
| Aae-1-2680 | NW_001811492.1 | + | 303137  | 303192  |
| Aae-1-2681 | NW_001811711.1 | - | 149580  | 149525  |
| Aae-1-2682 | NW_001809968.1 | + | 616426  | 616481  |
| Aae-1-2683 | NW_001810089.1 | - | 1987769 | 1987714 |
| Aae-1-2684 | NW_001810145.1 | + | 1141230 | 1141285 |
| Aae-1-2685 | NW_001811039.1 | + | 845046  | 845101  |
| Aae-1-2686 | NW_001811506.1 | - | 200327  | 200272  |

|            |                        |   |         |         |
|------------|------------------------|---|---------|---------|
| Aae-1-2687 | NW_001811596.1         | - | 2841473 | 2841418 |
| Aae-1-2688 | NW_001810133.1         | - | 3749112 | 3749057 |
| Aae-1-2689 | NW_001811459.1         | - | 199792  | 199737  |
| Aae-1-2690 | NW_001810148.1         | + | 46457   | 46512   |
| Aae-1-2691 | NW_001810783.1         | + | 2238170 | 2238225 |
| Aae-1-2692 | NW_001810837.1         | + | 802355  | 802410  |
| Aae-1-2693 | NW_001809912.1         | + | 1865999 | 1866054 |
| Aae-1-2694 | NW_001810189.1         | + | 2100678 | 2100733 |
| Aae-1-2695 | NW_001810350.1         | + | 2913878 | 2913933 |
| Aae-1-2696 | NW_001810555.1         | - | 2244950 | 2244895 |
| Aae-1-2697 | NW_001810714.1         | + | 958087  | 958142  |
| Aae-1-2698 | NW_001810917.1         | + | 1468913 | 1468968 |
| Aae-1-2699 | NW_001810950.1         | - | 470036  | 469981  |
| Aae-1-2700 | NW_001810994.1         | - | 568476  | 568421  |
| Aae-1-2701 | NW_001811007.1         | - | 2539358 | 2539303 |
| Aae-1-2702 | NW_001811179.1         | + | 868874  | 868929  |
| Aae-1-2703 | NW_001811183.1         | - | 641145  | 641090  |
| Aae-1-2704 | NW_001811354.1         | + | 303624  | 303679  |
| Aae-1-2705 | NW_001811425.1         | + | 283090  | 283145  |
| Aae-1-2706 | NW_001811562.1         | - | 448989  | 448934  |
| Aae-1-2707 | NW_001811619.1         | + | 22421   | 22476   |
| Aae-1-2708 | NW_001810852.1         | - | 1059261 | 1059209 |
| Aae-1-2709 | NW_001811312.1         | + | 304238  | 304293  |
| env-77     | JCVLSCAF_1096627510720 | - | 1705    | 1650    |
| Aae-1-2710 | NW_001811274.1         | + | 1479355 | 1479410 |
| Aae-1-2711 | NW_001811164.1         | - | 263092  | 263037  |
| Aae-1-2712 | NW_001837449.1         | + | 39752   | 39807   |
| Aae-1-2713 | NW_001811130.1         | + | 2508520 | 2508575 |
| Aae-1-2714 | NW_001811632.1         | + | 243305  | 243360  |
| Aae-1-2715 | NW_001811072.1         | - | 804784  | 804729  |
| Aae-1-2716 | NW_001811047.1         | - | 674654  | 674599  |
| Aae-1-2717 | NW_001810955.1         | - | 1835303 | 1835248 |
| Aae-1-2718 | NW_001809936.1         | + | 30506   | 30561   |
| Aae-1-2719 | NW_001811141.1         | - | 1540738 | 1540683 |
| Aae-1-2720 | NW_001810935.1         | - | 213833  | 213778  |
| Aae-1-2721 | NW_001810221.1         | - | 1399304 | 1399249 |
| Aae-1-2722 | NW_001810044.1         | + | 69199   | 69254   |
| Aae-1-2723 | NW_001809801.1         | + | 1785513 | 1785568 |
| Aae-1-2724 | NW_001810242.1         | - | 1030269 | 1030214 |
| Aae-1-2725 | NW_001811060.1         | - | 455083  | 455028  |
| Aae-1-2726 | NW_001811349.1         | - | 506391  | 506336  |
| Aae-1-2727 | NW_001811618.1         | - | 492258  | 492203  |
| Aae-1-2728 | NW_001809888.1         | - | 198697  | 198642  |
| Aae-1-2729 | NW_001810318.1         | - | 1118059 | 1118004 |
| Aae-1-2730 | NW_001810556.1         | - | 1065284 | 1065229 |
| Aae-1-2731 | NW_001810688.1         | + | 626229  | 626284  |
| Aae-1-2732 | NW_001810830.1         | + | 1675080 | 1675135 |
| Aae-1-2733 | NW_001810958.1         | - | 908554  | 908499  |
| Aae-1-2734 | NW_001811155.1         | - | 1140040 | 1139985 |
| Aae-1-2735 | NW_001811240.1         | + | 4931475 | 4931530 |
| Aae-1-2736 | NW_001811279.1         | + | 409285  | 409340  |
| Aae-1-2737 | NW_001811349.1         | - | 674745  | 674690  |

|            |                |   |         |         |
|------------|----------------|---|---------|---------|
| Aae-1-2738 | NW_001811512.1 | - | 462061  | 462006  |
| Aae-1-2739 | NW_001811774.1 | - | 284669  | 284614  |
| Aae-1-2740 | NW_001810912.1 | + | 2538998 | 2539053 |
| Aae-1-2741 | NW_001810880.1 | + | 870844  | 870899  |
| Aae-1-2742 | NW_001810852.1 | - | 1568163 | 1568108 |
| Aae-1-2743 | NW_001810610.1 | - | 3260    | 3205    |
| Aae-1-2744 | NW_001810537.1 | + | 1960885 | 1960940 |
| Aae-1-2745 | NW_001810527.1 | + | 520554  | 520609  |
| Aae-1-2746 | NW_001811044.1 | - | 825310  | 825255  |
| Aae-1-2747 | NW_001810436.1 | + | 1080577 | 1080632 |
| Aae-1-2748 | NW_001810681.1 | - | 1378924 | 1378869 |
| Aae-1-2749 | NW_001810440.1 | + | 7427    | 7482    |
| Aae-1-2750 | NW_001810242.1 | + | 1049047 | 1049102 |
| Aae-1-2751 | NW_001810499.1 | + | 612537  | 612592  |
| Aae-1-2752 | NW_001811073.1 | + | 1163893 | 1163948 |
| Aae-1-2753 | NW_001809802.1 | - | 38621   | 38566   |
| Aae-1-2754 | NW_001809847.1 | + | 1794238 | 1794293 |
| Aae-1-2755 | NW_001810133.1 | - | 2860806 | 2860751 |
| Aae-1-2756 | NW_001810242.1 | + | 2288265 | 2288320 |
| Aae-1-2757 | NW_001810813.1 | + | 330797  | 330852  |
| Aae-1-2758 | NW_001810844.1 | + | 1132600 | 1132655 |
| Aae-1-2759 | NW_001810955.1 | - | 250738  | 250683  |
| Aae-1-2760 | NW_001810980.1 | - | 1226938 | 1226883 |
| Aae-1-2761 | NW_001810984.1 | - | 2591356 | 2591301 |
| Aae-1-2762 | NW_001811051.1 | - | 646350  | 646295  |
| Aae-1-2763 | NW_001811065.1 | + | 362623  | 362678  |
| Aae-1-2764 | NW_001811115.1 | + | 1063411 | 1063466 |
| Aae-1-2765 | NW_001811130.1 | + | 1646720 | 1646775 |
| Aae-1-2766 | NW_001811174.1 | - | 2810953 | 2810898 |
| Aae-1-2767 | NW_001811185.1 | + | 1913693 | 1913748 |
| Aae-1-2768 | NW_001811189.1 | + | 739341  | 739396  |
| Aae-1-2769 | NW_001811215.1 | + | 722983  | 723038  |
| Aae-1-2770 | NW_001811248.1 | - | 205645  | 205590  |
| Aae-1-2771 | NW_001811351.1 | + | 3010390 | 3010445 |
| Aae-1-2772 | NW_001811540.1 | - | 1992829 | 1992774 |
| Aae-1-2773 | NW_001811618.1 | - | 389503  | 389448  |
| Aae-1-2774 | NW_001837205.1 | - | 4202    | 4147    |
| Aae-1-2775 | NW_001809836.1 | + | 1449073 | 1449128 |
| Aae-1-2776 | NW_001810893.1 | - | 1321655 | 1321600 |
| Aae-1-2777 | NW_001809847.1 | - | 1794232 | 1794177 |
| Aae-1-2778 | NW_001810178.1 | + | 1385388 | 1385443 |
| Aae-1-2779 | NW_001811240.1 | + | 117258  | 117313  |
| Aae-1-2780 | NW_001811315.1 | - | 368904  | 368849  |
| Aae-1-2781 | NW_001811498.1 | + | 216257  | 216312  |
| Aae-1-2782 | NW_001811686.1 | - | 183943  | 183888  |
| Aae-1-2783 | NW_001810203.1 | - | 11198   | 11143   |
| Aae-1-2784 | NW_001809838.1 | - | 210456  | 210401  |
| Aae-1-2785 | NW_001809913.1 | + | 1330150 | 1330205 |
| Aae-1-2786 | NW_001810072.1 | + | 54597   | 54652   |
| Aae-1-2787 | NW_001810078.1 | + | 2217943 | 2217998 |
| Aae-1-2788 | NW_001810095.1 | - | 133718  | 133663  |
| Aae-1-2789 | NW_001810122.1 | + | 2284962 | 2285017 |

|            |                |   |         |         |
|------------|----------------|---|---------|---------|
| Aae-1-2790 | NW_001810147.1 | + | 17587   | 17642   |
| Aae-1-2791 | NW_001810198.1 | + | 45228   | 45283   |
| Aae-1-2792 | NW_001810242.1 | + | 3918031 | 3918086 |
| Aae-1-2793 | NW_001810273.1 | + | 36115   | 36170   |
| Aae-1-2794 | NW_001810458.1 | + | 1095235 | 1095290 |
| Aae-1-2795 | NW_001810555.1 | - | 2979245 | 2979190 |
| Aae-1-2796 | NW_001810556.1 | + | 2042532 | 2042587 |
| Aae-1-2797 | NW_001810592.1 | + | 937995  | 938050  |
| Aae-1-2798 | NW_001810648.1 | + | 1221844 | 1221899 |
| Aae-1-2799 | NW_001810655.1 | - | 14950   | 14895   |
| Aae-1-2800 | NW_001810744.1 | + | 421505  | 421560  |
| Aae-1-2801 | NW_001810783.1 | + | 2921331 | 2921386 |
| Aae-1-2802 | NW_001810955.1 | - | 1754451 | 1754396 |
| Aae-1-2803 | NW_001810975.1 | + | 457087  | 457142  |
| Aae-1-2804 | NW_001811016.1 | + | 789927  | 789982  |
| Aae-1-2805 | NW_001811037.1 | + | 1078309 | 1078364 |
| Aae-1-2806 | NW_001811041.1 | + | 771866  | 771921  |
| Aae-1-2807 | NW_001811054.1 | + | 221852  | 221907  |
| Aae-1-2808 | NW_001811058.1 | - | 608759  | 608704  |
| Aae-1-2809 | NW_001811060.1 | - | 338359  | 338304  |
| Aae-1-2810 | NW_001811176.1 | + | 142001  | 142056  |
| Aae-1-2811 | NW_001811200.1 | + | 516476  | 516531  |
| Aae-1-2812 | NW_001811224.1 | - | 587163  | 587108  |
| Aae-1-2813 | NW_001811235.1 | + | 714115  | 714170  |
| Aae-1-2814 | NW_001811239.1 | + | 443375  | 443430  |
| Aae-1-2815 | NW_001811239.1 | + | 445065  | 445120  |
| Aae-1-2816 | NW_001811396.1 | + | 2535530 | 2535585 |
| Aae-1-2817 | NW_001811462.1 | + | 1286180 | 1286235 |
| Aae-1-2818 | NW_001811623.1 | + | 73328   | 73383   |
| Aae-1-2819 | NW_001811664.1 | - | 240734  | 240679  |
| Aae-1-2820 | NW_001811791.1 | + | 188532  | 188587  |
| Aae-1-2821 | NW_001837152.1 | - | 1297    | 1242    |
| Aae-1-2822 | NW_001809901.1 | + | 1893702 | 1893757 |
| Aae-1-2823 | NW_001810056.1 | - | 332245  | 332190  |
| Aae-1-2824 | NW_001810350.1 | + | 3541351 | 3541406 |
| Aae-1-2825 | NW_001810969.1 | - | 296696  | 296641  |
| Aae-1-2826 | NW_001835519.1 | + | 5437    | 5492    |
| Aae-1-2827 | NW_001809889.1 | + | 64752   | 64807   |
| Aae-1-2828 | NW_001809881.1 | + | 115483  | 115538  |
| Aae-1-2829 | NW_001810791.1 | - | 1462853 | 1462798 |
| Aae-1-2830 | NW_001810974.1 | - | 505718  | 505663  |
| Aae-1-2831 | NW_001837295.1 | + | 6433    | 6488    |
| Aae-1-2832 | NW_001811486.1 | + | 229220  | 229275  |
| Aae-1-2833 | NW_001811525.1 | + | 213205  | 213260  |
| Aae-1-2834 | NW_001811573.1 | + | 4345571 | 4345626 |
| Aae-1-2835 | NW_001811510.1 | - | 208547  | 208492  |
| Aae-1-2836 | NW_001811032.1 | + | 1160044 | 1160099 |
| Aae-1-2837 | NW_001811241.1 | + | 2307922 | 2307977 |
| Aae-1-2838 | NW_001811710.1 | - | 160937  | 160882  |
| Aae-1-2839 | NW_001811618.1 | + | 2370298 | 2370353 |
| Aae-1-2840 | NW_001811509.1 | - | 334074  | 334019  |
| Aae-1-2841 | NW_001811673.1 | - | 76847   | 76792   |



|            |                |   |         |         |
|------------|----------------|---|---------|---------|
| Aae-1-2842 | NW_001811718.1 | - | 222230  | 222175  |
| Aae-1-2843 | NW_001811067.1 | - | 497428  | 497373  |
| Aae-1-2844 | NW_001811066.1 | + | 419859  | 419914  |
| Aae-1-2845 | NW_001810954.1 | - | 1711170 | 1711115 |
| Aae-1-2846 | NW_001810984.1 | - | 31028   | 30973   |
| Aae-1-2847 | NW_001810783.1 | + | 796113  | 796168  |
| Aae-1-2848 | NW_001811018.1 | - | 4843932 | 4843877 |
| Aae-1-2849 | NW_001810508.1 | - | 869122  | 869067  |
| Aae-1-2850 | NW_001810783.1 | - | 1055347 | 1055292 |
| Aae-1-2851 | NW_001809802.1 | - | 35994   | 35939   |
| Aae-1-2852 | NW_001810022.1 | + | 299105  | 299160  |
| Aae-1-2853 | NW_001810318.1 | - | 623620  | 623565  |
| Aae-1-2854 | NW_001810437.1 | + | 21588   | 21643   |
| Aae-1-2855 | NW_001810681.1 | - | 1873604 | 1873549 |
| Aae-1-2856 | NW_001810756.1 | - | 651065  | 651010  |
| Aae-1-2857 | NW_001810880.1 | + | 3009171 | 3009226 |
| Aae-1-2858 | NW_001810905.1 | + | 994653  | 994708  |
| Aae-1-2859 | NW_001810984.1 | - | 2587195 | 2587140 |
| Aae-1-2860 | NW_001811034.1 | + | 1073747 | 1073802 |
| Aae-1-2861 | NW_001811115.1 | + | 920151  | 920206  |
| Aae-1-2862 | NW_001811129.1 | + | 312029  | 312084  |
| Aae-1-2863 | NW_001811131.1 | - | 803323  | 803268  |
| Aae-1-2864 | NW_001811221.1 | - | 525301  | 525246  |
| Aae-1-2865 | NW_001811409.1 | + | 164492  | 164547  |
| Aae-1-2866 | NW_001811523.1 | + | 404547  | 404602  |
| Aae-1-2867 | NW_001811629.1 | - | 618269  | 618214  |
| Aae-1-2868 | NW_001809868.1 | + | 2331267 | 2331322 |
| Aae-1-2869 | NW_001811474.1 | + | 2197080 | 2197135 |
| Aae-1-2870 | NW_001811596.1 | - | 725625  | 725570  |
| Aae-1-2871 | NW_001811629.1 | - | 1883398 | 1883343 |
| Aae-1-2872 | NW_001809852.1 | + | 121830  | 121885  |
| Aae-1-2873 | NW_001809875.1 | - | 11818   | 11763   |
| Aae-1-2874 | NW_001811791.1 | - | 188492  | 188433  |
| Aae-1-2875 | NW_001810981.1 | + | 518832  | 518886  |
| Aae-1-2876 | NW_001809912.1 | + | 3497815 | 3497868 |
| Aae-1-2877 | NW_001810133.1 | + | 158903  | 158958  |
| Aae-1-2878 | NW_001810403.1 | + | 271701  | 271754  |
| Aae-1-2879 | NW_001811227.1 | - | 323169  | 323116  |
| Aae-1-2880 | NW_001811133.1 | - | 824095  | 824040  |
| Aae-1-2881 | NW_001811499.1 | + | 438444  | 438496  |
| Aae-1-2882 | NW_001811671.1 | - | 352122  | 352067  |
| Aae-1-2883 | NW_001811007.1 | + | 3764396 | 3764452 |
| Aae-1-2884 | NW_001811385.1 | + | 302046  | 302100  |
| Aae-1-2885 | NW_001811384.1 | - | 140846  | 140792  |
| Aae-1-2886 | NW_001811498.1 | + | 171742  | 171796  |
| Aae-1-2887 | NW_001810350.1 | - | 1336879 | 1336827 |
| Aae-1-2888 | NW_001810955.1 | - | 2556042 | 2555990 |
| Aae-1-2889 | NW_001811095.1 | - | 50472   | 50420   |
| Aae-1-2890 | NW_001811647.1 | - | 34183   | 34128   |
| Aae-1-2891 | NW_001811252.1 | + | 1712116 | 1712166 |
| Aae-1-2892 | NW_001811621.1 | - | 428464  | 428409  |
| Aae-1-2893 | NW_001811496.1 | - | 660627  | 660577  |

|            |                |   |         |         |
|------------|----------------|---|---------|---------|
| Aae-1-2894 | NW_001810929.1 | - | 1335898 | 1335843 |
| Aae-1-2895 | NW_001811729.1 | + | 1923063 | 1923118 |
| Aae-1-2896 | NW_001811163.1 | + | 425582  | 425637  |
| Aae-1-2897 | NW_001811094.1 | + | 242391  | 242446  |
| Aae-1-2898 | NW_001811065.1 | - | 516973  | 516918  |
| Aae-1-2899 | NW_001809847.1 | - | 2503204 | 2503149 |
| Aae-1-2900 | NW_001811048.1 | + | 873709  | 873764  |
| Aae-1-2901 | NW_001810034.1 | + | 1142049 | 1142104 |
| Aae-1-2902 | NW_001810935.1 | - | 234395  | 234342  |
| Aae-1-2903 | NW_001811212.1 | - | 56703   | 56650   |
| Aae-1-2904 | NW_001810000.1 | + | 1943128 | 1943183 |
| Aae-1-2905 | NW_001810556.1 | + | 1891071 | 1891126 |
| Aae-1-2906 | NW_001811141.1 | + | 3028884 | 3028939 |
| Aae-1-2907 | NW_001811004.1 | + | 784053  | 784108  |
| Aae-1-2908 | NW_001811540.1 | - | 1893430 | 1893375 |
| Aae-1-2909 | NW_001810243.1 | - | 1118996 | 1118941 |
| Aae-1-2910 | NW_001811161.1 | - | 219827  | 219772  |
| Aae-1-2911 | NW_001811771.1 | - | 98257   | 98202   |
| Aae-1-2912 | NW_001811210.1 | - | 877500  | 877445  |
| Aae-1-2913 | NW_001811127.1 | + | 638802  | 638857  |
| Aae-1-2914 | NW_001810490.1 | + | 305335  | 305390  |
| Aae-1-2915 | NW_001811003.1 | + | 818604  | 818659  |
| Aae-1-2916 | NW_001811366.1 | - | 231824  | 231769  |
| Aae-1-2917 | NW_001811534.1 | - | 78370   | 78315   |
| Aae-1-2918 | NW_001810666.1 | - | 1142207 | 1142152 |
| Aae-1-2919 | NW_001811243.1 | + | 788372  | 788427  |
| Aae-1-2920 | NW_001810838.1 | - | 1115670 | 1115615 |
| Aae-1-2921 | NW_001810941.1 | - | 1612502 | 1612447 |
| Aae-1-2922 | NW_001810963.1 | + | 870335  | 870390  |
| Aae-1-2923 | NW_001810067.1 | + | 1667077 | 1667132 |
| Aae-1-2924 | NW_001810816.1 | - | 682619  | 682564  |
| Aae-1-2925 | NW_001811579.1 | + | 172692  | 172742  |
| Aae-1-2926 | NW_001811118.1 | + | 2442988 | 2443043 |
| Aae-1-2927 | NW_001811680.1 | - | 318026  | 317971  |
| Aae-1-2928 | NW_001809942.1 | + | 190166  | 190221  |
| Aae-1-2929 | NW_001810935.1 | + | 1135248 | 1135303 |
| Aae-1-2930 | NW_001811540.1 | - | 2566806 | 2566756 |
| Aae-1-2931 | NW_001811229.1 | - | 117801  | 117746  |
| Aae-1-2932 | NW_001811252.1 | - | 513041  | 512986  |
| Aae-1-2933 | NW_001811266.1 | + | 694821  | 694876  |
| Aae-1-2934 | NW_001811350.1 | - | 431418  | 431363  |
| Aae-1-2935 | NW_001811391.1 | - | 635023  | 634968  |
| Aae-1-2936 | NW_001811252.1 | + | 1901527 | 1901576 |
| Aae-1-2937 | NW_001811377.1 | - | 570769  | 570721  |
| Aae-1-2938 | NW_001837352.1 | - | 15192   | 15138   |
| Aae-1-2939 | NW_001811373.1 | - | 186496  | 186442  |
| Aae-1-2940 | NW_001811507.1 | + | 2314797 | 2314850 |
| Aae-1-2941 | NW_001811351.1 | + | 2734187 | 2734241 |
| Aae-1-2942 | NW_001811185.1 | + | 754903  | 754958  |
| Aae-1-2943 | NW_001811041.1 | + | 1137677 | 1137728 |
| Aae-1-2944 | NW_001811108.1 | + | 907001  | 907056  |
| Aae-1-2945 | NW_001811210.1 | + | 780977  | 781032  |

|            |                |   |         |         |
|------------|----------------|---|---------|---------|
| Aae-1-2946 | NW_001811660.1 | - | 218140  | 218085  |
| Aae-1-2947 | NW_001811084.1 | - | 366364  | 366310  |
| Aae-1-2948 | NW_001811446.1 | - | 186163  | 186109  |
| Aae-1-2949 | NW_001810592.1 | + | 1239632 | 1239685 |
| Aae-1-2950 | NW_001810947.1 | - | 900819  | 900767  |
| Aae-1-2951 | NW_001810935.1 | - | 197967  | 197915  |
| Aae-1-2952 | NW_001811384.1 | - | 9109    | 9057    |
| Aae-1-2953 | NW_001811010.1 | - | 1296818 | 1296769 |
| Aae-1-2954 | NW_001810235.1 | - | 99541   | 99490   |
| Aae-1-2955 | NW_001810078.1 | + | 954732  | 954784  |
| Aae-1-2956 | NW_001811105.1 | + | 1024292 | 1024346 |
| Aae-1-2957 | NW_001809879.1 | + | 549481  | 549535  |
| Aae-1-2958 | NW_001811084.1 | - | 937657  | 937605  |
| Aae-1-2959 | NW_001811593.1 | - | 402762  | 402708  |
| Aae-1-2960 | NW_001811037.1 | + | 458748  | 458800  |
| Aae-1-2961 | NW_001810715.1 | + | 732304  | 732358  |
| Aae-1-2962 | NW_001811065.1 | + | 784698  | 784752  |
| Aae-1-2963 | NW_001810565.1 | + | 90184   | 90238   |
| Aae-1-2964 | NW_001811759.1 | + | 6644    | 6698    |
| Aae-1-2965 | NW_001811609.1 | + | 319953  | 320007  |
| Aae-1-2966 | NW_001810912.1 | + | 717227  | 717281  |
| Aae-1-2967 | NW_001810231.1 | - | 1137779 | 1137725 |
| Aae-1-2968 | NW_001810960.1 | + | 239365  | 239419  |
| Aae-1-2969 | NW_001811174.1 | + | 2591619 | 2591673 |
| Aae-1-2970 | NW_001810945.1 | - | 121440  | 121386  |
| Aae-1-2971 | NW_001811432.1 | - | 237820  | 237766  |
| Aae-1-2972 | NW_001809927.1 | - | 141987  | 141933  |
| Aae-1-2973 | NW_001809924.1 | + | 368637  | 368691  |
| Aae-1-2974 | NW_001810986.1 | - | 1140211 | 1140157 |
| Aae-1-2975 | NW_001811670.1 | + | 490914  | 490976  |
| Aae-1-2976 | NW_001809816.1 | - | 42672   | 42618   |
| Aae-1-2977 | NW_001811300.1 | + | 281405  | 281459  |
| Aae-1-2978 | NW_001810681.1 | - | 822849  | 822795  |
| Aae-1-2979 | NW_001810750.1 | - | 308856  | 308802  |
| Aae-1-2980 | NW_001811237.1 | + | 835415  | 835469  |
| Aae-1-2981 | NW_001811281.1 | + | 88568   | 88622   |
| Aae-1-2982 | NW_001811597.1 | - | 174641  | 174587  |
| Aae-1-2983 | NW_001811440.1 | - | 702546  | 702494  |
| Aae-1-2984 | NW_001811296.1 | - | 356421  | 356369  |
| Aae-1-2985 | NW_001811263.1 | + | 2933054 | 2933106 |
| Aae-1-2986 | NW_001811207.1 | + | 2984203 | 2984257 |
| Aae-1-2987 | NW_001811393.1 | + | 518408  | 518461  |
| Aae-1-2988 | NW_001811196.1 | - | 2884408 | 2884356 |
| Aae-1-2989 | NW_001811193.1 | - | 756433  | 756379  |
| Aae-1-2990 | NW_001811140.1 | - | 381800  | 381748  |
| Aae-1-2991 | NW_001811137.1 | - | 771436  | 771384  |
| Aae-1-2992 | NW_001811496.1 | - | 2464639 | 2464585 |
| Aae-1-2993 | NW_001811120.1 | - | 406102  | 406048  |
| Aae-1-2994 | NW_001811109.1 | - | 458824  | 458772  |
| Aae-1-2995 | NW_001811085.1 | + | 1635116 | 1635168 |
| Aae-1-2996 | NW_001811059.1 | + | 854808  | 854860  |
| Aae-1-2997 | NW_001811056.1 | + | 13812   | 13866   |

|            |                |   |         |         |
|------------|----------------|---|---------|---------|
| Aae-1-2998 | NW_001811035.1 | - | 1106277 | 1106225 |
| Aae-1-2999 | NW_001834983.1 | + | 2506    | 2558    |
| Aae-1-3000 | NW_001811539.1 | - | 508542  | 508475  |
| Aae-1-3001 | NW_001811360.1 | + | 538592  | 538645  |
| Aae-1-3002 | NW_001810178.1 | + | 1462583 | 1462635 |
| Aae-1-3003 | NW_001811389.1 | - | 607628  | 607576  |
| Aae-1-3004 | NW_001811327.1 | - | 143442  | 143390  |
| Aae-1-3005 | NW_001836490.1 | - | 7767    | 7715    |
| Aae-1-3006 | NW_001811381.1 | - | 113190  | 113138  |
| Aae-1-3007 | NW_001811573.1 | - | 1625306 | 1625254 |
| Aae-1-3008 | NW_001811673.1 | - | 124838  | 124786  |
| Aae-1-3009 | NW_001810656.1 | + | 1186416 | 1186471 |
| Aae-1-3010 | NW_001811684.1 | - | 375235  | 375183  |
| Aae-1-3011 | NW_001810852.1 | + | 1702854 | 1702908 |
| Aae-1-3012 | NW_001810763.1 | + | 656902  | 656954  |
| Aae-1-3013 | NW_001810616.1 | - | 755258  | 755204  |
| Aae-1-3014 | NW_001811463.1 | - | 937880  | 937828  |
| Aae-1-3015 | NW_001810034.1 | - | 1348797 | 1348745 |
| Aae-1-3016 | NW_001809957.1 | - | 1959918 | 1959866 |
| Aae-1-3017 | NW_001811432.1 | - | 335473  | 335419  |
| Aae-1-3018 | NW_001811252.1 | - | 381481  | 381428  |
| Aae-1-3019 | NW_001811710.1 | - | 251980  | 251926  |
| Aae-1-3020 | NW_001811702.1 | + | 55249   | 55303   |
| Aae-1-3021 | NW_001811206.1 | + | 83159   | 83213   |
| Aae-1-3022 | NW_001811193.1 | + | 740375  | 740429  |
| Aae-1-3023 | NW_001811077.1 | + | 836895  | 836949  |
| Aae-1-3024 | NW_001811050.1 | + | 1027431 | 1027485 |
| Aae-1-3025 | NW_001811024.1 | - | 533069  | 533015  |
| Aae-1-3026 | NW_001810403.1 | - | 177954  | 177900  |
| Aae-1-3027 | NW_001811011.1 | - | 799208  | 799152  |
| Aae-1-3028 | NW_001811007.1 | - | 2876952 | 2876898 |
| Aae-1-3029 | NW_001811462.1 | - | 2322218 | 2322164 |
| Aae-1-3030 | NW_001810980.1 | + | 1180780 | 1180834 |
| Aae-1-3031 | NW_001810966.1 | - | 1566586 | 1566532 |
| Aae-1-3032 | NW_001810838.1 | - | 1446876 | 1446822 |
| Aae-1-3033 | NW_001811520.1 | + | 170742  | 170796  |
| Aae-1-3034 | NW_001810178.1 | - | 47667   | 47613   |
| Aae-1-3035 | NW_001810056.1 | + | 1095863 | 1095917 |
| Aae-1-3036 | NW_001811469.1 | + | 83928   | 83982   |
| Aae-1-3037 | NW_001809935.1 | + | 2050936 | 2050990 |
| Aae-1-3038 | NW_001811596.1 | + | 1090289 | 1090343 |
| Aae-1-3039 | NW_001811599.1 | + | 233174  | 233228  |
| Aae-1-3040 | NW_001811744.1 | + | 243060  | 243113  |
| Aae-1-3041 | NW_001810969.1 | - | 240541  | 240489  |
| Aae-1-3042 | NW_001811718.1 | + | 566996  | 567048  |
| Aae-1-3043 | NW_001811707.1 | - | 2230545 | 2230496 |
| Aae-1-3044 | NW_001810159.1 | + | 75690   | 75742   |
| Aae-1-3045 | NW_001810638.1 | + | 320037  | 320089  |
| Aae-1-3046 | NW_001811079.1 | - | 670358  | 670305  |
| Aae-1-3047 | NW_001810981.1 | - | 804372  | 804321  |
| Aae-1-3048 | NW_001810681.1 | + | 1404357 | 1404409 |
| Aae-1-3049 | NW_001810033.1 | - | 124178  | 124126  |

|            |                |   |         |         |
|------------|----------------|---|---------|---------|
| Aae-1-3050 | NW_001811018.1 | + | 2336180 | 2336232 |
| Aae-1-3051 | NW_001811168.1 | - | 24123   | 24071   |
| Aae-1-3052 | NW_001811414.1 | - | 571488  | 571436  |
| Aae-1-3053 | NW_001811418.1 | - | 302970  | 302918  |
| Aae-1-3054 | NW_001809896.1 | - | 132142  | 132090  |
| Aae-1-3055 | NW_001811713.1 | - | 367736  | 367684  |
| Aae-1-3056 | NW_001810134.1 | + | 2393389 | 2393441 |
| Aae-1-3057 | NW_001810638.1 | + | 745502  | 745554  |
| Aae-1-3058 | NW_001810782.1 | + | 4975063 | 4975115 |
| Aae-1-3059 | NW_001810254.1 | - | 1811101 | 1811055 |
| Aae-1-3060 | NW_001811429.1 | + | 406538  | 406589  |
| Aae-1-3061 | NW_001811122.1 | + | 423768  | 423816  |
| Aae-1-3062 | NW_001810981.1 | + | 517081  | 517131  |
| Aae-1-3063 | NW_001811719.1 | + | 66225   | 66279   |
| Aae-1-3064 | NW_001810868.1 | - | 792873  | 792819  |
| Aae-1-3065 | NW_001810996.1 | + | 2840239 | 2840290 |
| Aae-1-3066 | NW_001810242.1 | - | 861493  | 861442  |
| Aae-1-3067 | NW_001810242.1 | + | 2161080 | 2161134 |
| Aae-1-3068 | NW_001810167.1 | - | 600075  | 600024  |
| Aae-1-3069 | NW_001810034.1 | + | 2090761 | 2090815 |
| Aae-1-3070 | NW_001811762.1 | + | 217555  | 217607  |
| Aae-1-3071 | NW_001811754.1 | - | 126424  | 126372  |
| Aae-1-3072 | NW_001811684.1 | + | 840715  | 840768  |
| Aae-1-3073 | NW_001811530.1 | + | 82914   | 82966   |
| Aae-1-3074 | NW_001811527.1 | - | 277876  | 277824  |
| Aae-1-3075 | NW_001811514.1 | - | 123734  | 123682  |
| Aae-1-3076 | NW_001811175.1 | - | 464022  | 463970  |
| Aae-1-3077 | NW_001811502.1 | - | 491101  | 491049  |
| Aae-1-3078 | NW_001811477.1 | + | 317312  | 317364  |
| Aae-1-3079 | NW_001835868.1 | - | 3378    | 3326    |
| Aae-1-3080 | NW_001811385.1 | - | 83810   | 83758   |
| Aae-1-3081 | NW_001811370.1 | + | 182624  | 182676  |
| Aae-1-3082 | NW_001811351.1 | - | 4032785 | 4032733 |
| Aae-1-3083 | NW_001811322.1 | - | 571330  | 571278  |
| Aae-1-3084 | NW_001811318.1 | + | 744057  | 744109  |
| Aae-1-3085 | NW_001811315.1 | + | 237996  | 238048  |
| Aae-1-3086 | NW_001811225.1 | + | 420703  | 420755  |
| Aae-1-3087 | NW_001811222.1 | - | 962130  | 962078  |
| Aae-1-3088 | NW_001811170.1 | - | 701010  | 700958  |
| Aae-1-3089 | NW_001811168.1 | + | 943207  | 943259  |
| Aae-1-3090 | NW_001810000.1 | - | 1008678 | 1008626 |
| Aae-1-3091 | NW_001810805.1 | - | 657295  | 657243  |
| Aae-1-3092 | NW_001811051.1 | - | 1104927 | 1104875 |
| Aae-1-3093 | NW_001811380.1 | + | 238331  | 238383  |
| Aae-1-3094 | NW_001811640.1 | - | 1181335 | 1181283 |
| Aae-1-3095 | NW_001811662.1 | + | 1639945 | 1639997 |
| Aae-1-3096 | NW_001810041.1 | + | 89118   | 89170   |
| Aae-1-3097 | NW_001811154.1 | - | 106730  | 106678  |
| Aae-1-3098 | NW_001811135.1 | + | 375836  | 375888  |
| Aae-1-3099 | NW_001811110.1 | + | 171295  | 171347  |
| Aae-1-3100 | NW_001811096.1 | + | 3458294 | 3458346 |
| Aae-1-3101 | NW_001811077.1 | + | 1154544 | 1154596 |

|            |                |   |         |         |
|------------|----------------|---|---------|---------|
| Aae-1-3102 | NW_001811071.1 | - | 1185345 | 1185293 |
| Aae-1-3103 | NW_001811055.1 | + | 208797  | 208849  |
| Aae-1-3104 | NW_001811054.1 | + | 430917  | 430969  |
| Aae-1-3105 | NW_001811042.1 | - | 848189  | 848135  |
| Aae-1-3106 | NW_001811019.1 | + | 1959069 | 1959121 |
| Aae-1-3107 | NW_001811018.1 | - | 2846876 | 2846824 |
| Aae-1-3108 | NW_001811007.1 | + | 1911737 | 1911789 |
| Aae-1-3109 | NW_001810998.1 | - | 806579  | 806527  |
| Aae-1-3110 | NW_001810984.1 | + | 136450  | 136502  |
| Aae-1-3111 | NW_001810963.1 | - | 508898  | 508846  |
| Aae-1-3112 | NW_001810954.1 | - | 956096  | 956044  |
| Aae-1-3113 | NW_001810895.1 | - | 872170  | 872118  |
| Aae-1-3114 | NW_001810783.1 | - | 1435624 | 1435572 |
| Aae-1-3115 | NW_001810721.1 | - | 783800  | 783748  |
| Aae-1-3116 | NW_001810675.1 | - | 383140  | 383088  |
| Aae-1-3117 | NW_001810629.1 | + | 403886  | 403938  |
| Aae-1-3118 | NW_001810304.1 | - | 1209    | 1157    |
| Aae-1-3119 | NW_001811551.1 | - | 2094492 | 2094440 |
| Aae-1-3120 | NW_001810182.1 | + | 162775  | 162827  |
| Aae-1-3121 | NW_001810134.1 | - | 891499  | 891445  |
| Aae-1-3122 | NW_001810042.1 | + | 193983  | 194035  |
| Aae-1-3123 | NW_001809989.1 | + | 875128  | 875180  |
| Aae-1-3124 | NW_001809935.1 | + | 972875  | 972927  |
| Aae-1-3125 | NW_001809879.1 | + | 2357464 | 2357516 |
| Aae-1-3126 | NW_001809857.1 | + | 143740  | 143792  |
| Aae-1-3127 | NW_001811670.1 | - | 490869  | 490815  |
| Aae-1-3128 | NW_001811576.1 | + | 181039  | 181093  |
| Aae-1-3129 | NW_001811477.1 | - | 91718   | 91664   |
| Aae-1-3130 | NW_001811442.1 | + | 70114   | 70168   |
| Aae-1-3131 | NW_001810592.1 | + | 664332  | 664386  |
| Aae-1-3132 | NW_001809912.1 | + | 3039260 | 3039314 |
| Aae-1-3133 | NW_001810122.1 | - | 2243304 | 2243250 |
| Aae-1-3134 | NW_001811351.1 | + | 2728885 | 2728939 |
| Aae-1-3135 | NW_001811440.1 | - | 1409501 | 1409447 |
| Aae-1-3136 | NW_001811348.1 | - | 238336  | 238282  |
| Aae-1-3137 | NW_001811296.1 | + | 1130    | 1185    |
| Aae-1-3138 | NW_001811295.1 | - | 76991   | 76937   |
| Aae-1-3139 | NW_001811252.1 | + | 1770618 | 1770672 |
| Aae-1-3140 | NW_001811203.1 | - | 43778   | 43724   |
| Aae-1-3141 | NW_001811133.1 | - | 995703  | 995649  |
| Aae-1-3142 | NW_001811099.1 | - | 79465   | 79411   |
| Aae-1-3143 | NW_001811070.1 | + | 1099669 | 1099723 |
| Aae-1-3144 | NW_001811019.1 | - | 495155  | 495101  |
| Aae-1-3145 | NW_001810929.1 | + | 968274  | 968328  |
| Aae-1-3146 | NW_001810852.1 | - | 652146  | 652092  |
| Aae-1-3147 | NW_001810813.1 | - | 304411  | 304357  |
| Aae-1-3148 | NW_001810763.1 | - | 912158  | 912104  |
| Aae-1-3149 | NW_001810714.1 | - | 2923461 | 2923407 |
| Aae-1-3150 | NW_001809951.1 | + | 145628  | 145682  |
| Aae-1-3151 | NW_001810960.1 | - | 395431  | 395377  |
| Aae-1-3152 | NW_001811463.1 | + | 1940874 | 1940928 |
| Aae-1-3153 | NW_001810702.1 | + | 1646261 | 1646315 |

|            |                |   |         |         |
|------------|----------------|---|---------|---------|
| Aae-1-3154 | NW_001810575.1 | - | 1198903 | 1198849 |
| Aae-1-3155 | NW_001810481.1 | - | 36084   | 36030   |
| Aae-1-3156 | NW_001810459.1 | - | 2102994 | 2102940 |
| Aae-1-3157 | NW_001810089.1 | + | 901500  | 901554  |
| Aae-1-3158 | NW_001810133.1 | + | 2233520 | 2233570 |
| Aae-1-3159 | NW_001809817.1 | - | 95596   | 95546   |
| Aae-1-3160 | NW_001811087.1 | + | 503151  | 503205  |
| Aae-1-3161 | NW_001811610.1 | - | 512076  | 512025  |
| Aae-1-3162 | NW_001810178.1 | + | 2200619 | 2200670 |
| Aae-1-3163 | NW_001809803.1 | + | 1484770 | 1484821 |
| Aae-1-3164 | NW_001811035.1 | - | 504957  | 504905  |
| Aae-1-3165 | NW_001809922.1 | + | 190747  | 190799  |
| Aae-1-3166 | NW_001811290.1 | + | 354090  | 354142  |
| Aae-1-3167 | NW_001811651.1 | + | 1266596 | 1266650 |
| Aae-1-3168 | NW_001810133.1 | - | 101026  | 100974  |
| Aae-1-3169 | NW_001811010.1 | - | 893182  | 893130  |
| Aae-1-3170 | NW_001811076.1 | - | 355227  | 355175  |
| Aae-1-3171 | NW_001811107.1 | + | 582220  | 582272  |
| Aae-1-3172 | NW_001811429.1 | - | 604922  | 604868  |
| Aae-1-3173 | NW_001811129.1 | + | 3459173 | 3459225 |
| Aae-1-3174 | NW_001811507.1 | - | 855456  | 855404  |
| Aae-1-3175 | NW_001811103.1 | - | 1087236 | 1087184 |
| Aae-1-3176 | NW_001811036.1 | - | 213289  | 213237  |
| Aae-1-3177 | NW_001809979.1 | + | 1476544 | 1476596 |
| Aae-1-3178 | NW_001811327.1 | + | 477652  | 477704  |
| Aae-1-3179 | NW_001811337.1 | - | 213018  | 212966  |
| Aae-1-3180 | NW_001811363.1 | + | 1260938 | 1260990 |
| Aae-1-3181 | NW_001811585.1 | + | 2555174 | 2555226 |
| Aae-1-3182 | NW_001810157.1 | + | 48422   | 48474   |
| Aae-1-3183 | NW_001811793.1 | - | 229574  | 229520  |
| Aae-1-3184 | NW_001811596.1 | + | 1775613 | 1775665 |
| Aae-1-3185 | NW_001811337.1 | - | 614617  | 614565  |
| Aae-1-3186 | NW_001811138.1 | + | 485012  | 485064  |
| Aae-1-3187 | NW_001811252.1 | + | 781198  | 781250  |
| Aae-1-3188 | NW_001811207.1 | + | 385411  | 385463  |
| Aae-1-3189 | NW_001811059.1 | - | 572740  | 572688  |
| Aae-1-3190 | NW_001810972.1 | - | 444005  | 443953  |
| Aae-1-3191 | NW_001810941.1 | + | 420974  | 421026  |
| Aae-1-3192 | NW_001810371.1 | + | 749965  | 750017  |
| Aae-1-3193 | NW_001810371.1 | - | 749939  | 749887  |
| Aae-1-3194 | NW_001810213.1 | + | 14275   | 14327   |
| Aae-1-3195 | NW_001811019.1 | + | 2697081 | 2697133 |
| Aae-1-3196 | NW_001811228.1 | + | 663079  | 663131  |
| Aae-1-3197 | NW_001810254.1 | - | 1091087 | 1091035 |
| Aae-1-3198 | NW_001811285.1 | - | 509982  | 509930  |
| Aae-1-3199 | NW_001811112.1 | + | 1099187 | 1099239 |
| Aae-1-3200 | NW_001811003.1 | + | 777925  | 777977  |
| Aae-1-3201 | NW_001810189.1 | + | 435951  | 436003  |
| Aae-1-3202 | NW_001810864.1 | + | 892516  | 892570  |
| Aae-1-3203 | NW_001810971.1 | + | 948770  | 948824  |
| Aae-1-3204 | NW_001809986.1 | + | 135108  | 135162  |
| Aae-1-3205 | NW_001810880.1 | + | 2440689 | 2440741 |

|            |                |   |         |         |
|------------|----------------|---|---------|---------|
| Aae-1-3206 | NW_001810977.1 | + | 670754  | 670806  |
| Aae-1-3207 | NW_001811141.1 | + | 112067  | 112119  |
| Aae-1-3208 | NW_001811301.1 | + | 573971  | 574023  |
| Aae-1-3209 | NW_001811276.1 | + | 104932  | 104984  |
| Aae-1-3210 | NW_001810847.1 | - | 1670251 | 1670199 |
| Aae-1-3211 | NW_001811229.1 | + | 1061551 | 1061605 |
| Aae-1-3212 | NW_001811105.1 | + | 314967  | 315021  |
| Aae-1-3213 | NW_001810945.1 | + | 345339  | 345393  |
| Aae-1-3214 | NW_001810945.1 | + | 346779  | 346833  |
| Aae-1-3215 | NW_001810945.1 | + | 158110  | 158164  |
| Aae-1-3216 | NW_001809824.1 | - | 112382  | 112328  |
| Aae-1-3217 | NW_001809801.1 | - | 5117112 | 5117058 |
| Aae-1-3218 | NW_001811329.1 | - | 1796648 | 1796594 |
| Aae-1-3219 | NW_001811340.1 | - | 2025165 | 2025111 |
| Aae-1-3220 | NW_001811206.1 | - | 204295  | 204241  |
| Aae-1-3221 | NW_001810681.1 | - | 1728527 | 1728473 |
| Aae-1-3222 | NW_001811115.1 | + | 688496  | 688550  |
| Aae-1-3223 | NW_001811141.1 | + | 789275  | 789329  |
| Aae-1-3224 | NW_001811573.1 | + | 4735676 | 4735730 |
| Aae-1-3225 | NW_001810555.1 | - | 1734066 | 1734012 |
| Aae-1-3226 | NW_001811018.1 | + | 3105173 | 3105227 |
| Aae-1-3227 | NW_001811018.1 | + | 3111751 | 3111805 |
| Aae-1-3228 | NW_001811018.1 | - | 3101823 | 3101769 |
| Aae-1-3229 | NW_001811027.1 | - | 93336   | 93282   |
| Aae-1-3230 | NW_001811041.1 | + | 1375323 | 1375377 |
| Aae-1-3231 | NW_001811585.1 | - | 2858159 | 2858105 |
| Aae-1-3232 | NW_001811620.1 | + | 491908  | 491962  |
| Aae-1-3233 | NW_001811729.1 | + | 1130959 | 1131013 |
| Aae-1-3234 | NW_001811770.1 | + | 345431  | 345485  |
| Aae-1-3235 | NW_001810459.1 | + | 2103002 | 2103056 |
| Aae-1-3236 | NW_001810307.1 | - | 2118782 | 2118728 |
| Aae-1-3237 | NW_001809894.1 | + | 192093  | 192147  |
| Aae-1-3238 | NW_001810891.1 | + | 1200773 | 1200827 |
| Aae-1-3239 | NW_001810020.1 | - | 32430   | 32379   |
| Aae-1-3240 | NW_001811251.1 | - | 738632  | 738581  |
| Aae-1-3241 | NW_001811470.1 | - | 256727  | 256673  |
| Aae-1-3242 | NW_001810855.1 | + | 242833  | 242887  |
| Aae-1-3243 | NW_001810895.1 | + | 284578  | 284632  |
| Aae-1-3244 | NW_001810996.1 | - | 1010412 | 1010358 |
| Aae-1-3245 | NW_001809817.1 | + | 95602   | 95656   |
| Aae-1-3246 | NW_001811251.1 | + | 801823  | 801877  |
| Aae-1-3247 | NW_001811048.1 | + | 103669  | 103723  |
| Aae-1-3248 | NW_001811299.1 | + | 253886  | 253940  |
| Aae-1-3249 | NW_001811419.1 | + | 528337  | 528391  |
| Aae-1-3250 | NW_001834983.1 | - | 1588    | 1534    |
| Aae-1-3251 | NW_001811099.1 | + | 79490   | 79542   |
| Aae-1-3252 | NW_001811260.1 | + | 62423   | 62475   |
| Aae-1-3253 | NW_001811137.1 | - | 602155  | 602103  |
| Aae-1-3254 | NW_001810944.1 | + | 419188  | 419240  |
| Aae-1-3255 | NW_001811224.1 | + | 721826  | 721878  |
| Aae-1-3256 | NW_001811274.1 | + | 1590688 | 1590741 |
| Aae-1-3257 | NW_001811034.1 | + | 691669  | 691721  |



|            |                |   |         |         |
|------------|----------------|---|---------|---------|
| Aae-1-3258 | NW_001811152.1 | + | 742133  | 742185  |
| Aae-1-3259 | NW_001811468.1 | + | 300619  | 300671  |
| Aae-1-3260 | NW_001811318.1 | - | 1476458 | 1476406 |
| Aae-1-3261 | NW_001811412.1 | - | 376255  | 376203  |
| Aae-1-3262 | NW_001811640.1 | - | 330093  | 330041  |
| Aae-1-3263 | NW_001811574.1 | - | 2806887 | 2806835 |
| Aae-1-3264 | NW_001811303.1 | + | 683231  | 683283  |
| Aae-1-3265 | NW_001811317.1 | - | 425991  | 425939  |
| Aae-1-3266 | NW_001811460.1 | - | 158670  | 158618  |
| Aae-1-3267 | NW_001811449.1 | - | 374432  | 374380  |
| Aae-1-3268 | NW_001811405.1 | + | 389084  | 389136  |
| Aae-1-3269 | NW_001811385.1 | - | 2461170 | 2461118 |
| Aae-1-3270 | NW_001811385.1 | + | 2196797 | 2196849 |
| Aae-1-3271 | NW_001811369.1 | + | 208368  | 208420  |
| Aae-1-3272 | NW_001811308.1 | + | 701203  | 701255  |
| Aae-1-3273 | NW_001810286.1 | - | 1454552 | 1454500 |
| Aae-1-3274 | NW_001810984.1 | - | 886934  | 886882  |
| Aae-1-3275 | NW_001811163.1 | + | 390034  | 390086  |
| Aae-1-3276 | NW_001811181.1 | - | 296136  | 296084  |
| Aae-1-3277 | NW_001810023.1 | - | 2345094 | 2345042 |
| Aae-1-3278 | NW_001810054.1 | + | 142013  | 142065  |
| Aae-1-3279 | NW_001810111.1 | - | 1514327 | 1514275 |
| Aae-1-3280 | NW_001810791.1 | + | 1079396 | 1079448 |
| Aae-1-3281 | NW_001810952.1 | + | 1193489 | 1193541 |
| Aae-1-3282 | NW_001811718.1 | - | 2178839 | 2178787 |
| Aae-1-3283 | NW_001810034.1 | - | 1565223 | 1565171 |
| Aae-1-3284 | NW_001811003.1 | - | 234924  | 234872  |
| Aae-1-3285 | NW_001811115.1 | + | 1114967 | 1115019 |
| Aae-1-3286 | NW_001811339.1 | + | 33363   | 33415   |
| Aae-1-3287 | NW_001809913.1 | - | 636866  | 636813  |
| Aae-1-3288 | NW_001811021.1 | + | 1195632 | 1195684 |
| Aae-1-3289 | NW_001810681.1 | - | 1404141 | 1404087 |
| Aae-1-3290 | NW_001811045.1 | + | 952111  | 952163  |
| Aae-1-3291 | NW_001811007.1 | + | 2065257 | 2065309 |
| Aae-1-3292 | NW_001810852.1 | - | 1301714 | 1301662 |
| Aae-1-3293 | NW_001810783.1 | + | 766394  | 766446  |
| Aae-1-3294 | NW_001810462.1 | + | 2819    | 2871    |
| Aae-1-3295 | NW_001810414.1 | - | 453657  | 453605  |
| Aae-1-3296 | NW_001810221.1 | + | 1860176 | 1860228 |
| Aae-1-3297 | NW_001809847.1 | - | 1096174 | 1096122 |
| Aae-1-3298 | NW_001810174.1 | - | 14770   | 14718   |
| Aae-1-3299 | NW_001811156.1 | + | 631462  | 631514  |
| Aae-1-3300 | NW_001811562.1 | + | 2598175 | 2598227 |
| Aae-1-3301 | NW_001809861.1 | - | 54631   | 54579   |
| Aae-1-3302 | NW_001810990.1 | - | 1193038 | 1192986 |
| Aae-1-3303 | NW_001809825.1 | + | 997733  | 997785  |
| Aae-1-3304 | NW_001809814.1 | - | 1348197 | 1348145 |
| Aae-1-3305 | NW_001811180.1 | - | 65659   | 65607   |
| Aae-1-3306 | NW_001809816.1 | + | 42997   | 43049   |
| Aae-1-3307 | NW_001810027.1 | - | 97337   | 97285   |
| Aae-1-3308 | NW_001810157.1 | + | 18571   | 18623   |
| Aae-1-3309 | NW_001810556.1 | + | 2076033 | 2076085 |

|            |                |   |         |         |
|------------|----------------|---|---------|---------|
| Aae-1-3310 | NW_001810912.1 | - | 3397203 | 3397151 |
| Aae-1-3311 | NW_001811163.1 | + | 1097089 | 1097141 |
| Aae-1-3312 | NW_001811543.1 | - | 213595  | 213543  |
| Aae-1-3313 | NW_001809879.1 | - | 1859371 | 1859319 |
| Aae-1-3314 | NW_001810783.1 | - | 2043496 | 2043444 |
| Aae-1-3315 | NW_001810929.1 | - | 731884  | 731832  |
| Aae-1-3316 | NW_001811022.1 | + | 1016530 | 1016582 |
| Aae-1-3317 | NW_001811074.1 | + | 707263  | 707315  |
| Aae-1-3318 | NW_001811351.1 | - | 1465857 | 1465805 |
| Aae-1-3319 | NW_001811443.1 | - | 361174  | 361122  |
| Aae-1-3320 | NW_001811229.1 | + | 1974944 | 1974996 |
| Aae-1-3321 | NW_001811344.1 | - | 416143  | 416091  |
| Aae-1-3322 | NW_001810192.1 | - | 46687   | 46635   |
| Aae-1-3323 | NW_001811391.1 | - | 128756  | 128704  |
| Aae-1-3324 | NW_001810592.1 | - | 58071   | 58017   |
| Aae-1-3325 | NW_001810637.1 | - | 2971742 | 2971690 |
| Aae-1-3326 | NW_001810998.1 | - | 1282249 | 1282197 |
| Aae-1-3327 | NW_001811029.1 | - | 160239  | 160187  |
| Aae-1-3328 | NW_001811474.1 | - | 2184634 | 2184582 |
| Aae-1-3329 | NW_001811452.1 | + | 551886  | 551938  |
| Aae-1-3330 | NW_001811761.1 | - | 1837933 | 1837881 |
| Aae-1-3331 | NW_001811596.1 | - | 1792068 | 1792016 |
| Aae-1-3332 | NW_001811565.1 | + | 36767   | 36819   |
| Aae-1-3333 | NW_001811525.1 | + | 99737   | 99789   |
| Aae-1-3334 | NW_001811506.1 | + | 441463  | 441515  |
| Aae-1-3335 | NW_001811010.1 | - | 517108  | 517056  |
| Aae-1-3336 | NW_001811188.1 | - | 769520  | 769468  |
| Aae-1-3337 | NW_001811263.1 | - | 3011203 | 3011151 |
| Aae-1-3338 | NW_001810784.1 | + | 1834240 | 1834292 |
| Aae-1-3339 | NW_001811098.1 | - | 709734  | 709682  |
| Aae-1-3340 | NW_001811070.1 | + | 752666  | 752718  |
| Aae-1-3341 | NW_001811216.1 | - | 334183  | 334131  |
| Aae-1-3342 | NW_001809945.1 | - | 207244  | 207192  |
| Aae-1-3343 | NW_001809979.1 | + | 959216  | 959268  |
| Aae-1-3344 | NW_001811375.1 | + | 433152  | 433204  |
| Aae-1-3345 | NW_001811202.1 | - | 589062  | 589010  |
| Aae-1-3346 | NW_001810134.1 | - | 2393354 | 2393302 |
| Aae-1-3347 | NW_001810782.1 | - | 4975028 | 4974976 |
| Aae-1-3348 | NW_001810855.1 | + | 459981  | 460033  |
| Aae-1-3349 | NW_001810981.1 | + | 662617  | 662669  |
| Aae-1-3350 | NW_001811098.1 | - | 246089  | 246037  |
| Aae-1-3351 | NW_001811380.1 | - | 621111  | 621059  |
| Aae-1-3352 | NW_001810952.1 | - | 1193452 | 1193400 |
| Aae-1-3353 | NW_001810967.1 | - | 864957  | 864905  |
| Aae-1-3354 | NW_001810929.1 | + | 1520809 | 1520861 |
| Aae-1-3355 | NW_001811067.1 | + | 107254  | 107306  |
| Aae-1-3356 | NW_001811540.1 | + | 2603986 | 2604038 |
| Aae-1-3357 | NW_001811421.1 | - | 427004  | 426952  |
| Aae-1-3358 | NW_001811418.1 | - | 2489671 | 2489619 |
| Aae-1-3359 | NW_001811311.1 | - | 123336  | 123284  |
| Aae-1-3360 | NW_001811292.1 | + | 82685   | 82737   |
| Aae-1-3361 | NW_001811280.1 | - | 311658  | 311606  |

|            |                |   |         |         |
|------------|----------------|---|---------|---------|
| Aae-1-3362 | NW_001811254.1 | + | 231887  | 231939  |
| Aae-1-3363 | NW_001811446.1 | + | 537552  | 537604  |
| Aae-1-3364 | NW_001811718.1 | + | 89008   | 89060   |
| Aae-1-3365 | NW_001811252.1 | + | 538545  | 538597  |
| Aae-1-3366 | NW_001811101.1 | - | 720090  | 720038  |
| Aae-1-3367 | NW_001811665.1 | + | 338107  | 338159  |
| Aae-1-3368 | NW_001809957.1 | + | 1892276 | 1892328 |
| Aae-1-3369 | NW_001810784.1 | + | 1192665 | 1192717 |
| Aae-1-3370 | NW_001811152.1 | + | 3351578 | 3351630 |
| Aae-1-3371 | NW_001809910.1 | - | 132920  | 132868  |
| Aae-1-3372 | NW_001809913.1 | + | 255613  | 255665  |
| Aae-1-3373 | NW_001810111.1 | + | 64917   | 64969   |
| Aae-1-3374 | NW_001810782.1 | - | 1296527 | 1296475 |
| Aae-1-3375 | NW_001811010.1 | + | 1200522 | 1200574 |
| Aae-1-3376 | NW_001811037.1 | - | 854590  | 854538  |
| Aae-1-3377 | NW_001811398.1 | - | 89384   | 89332   |
| Aae-1-3378 | NW_001836538.1 | - | 1998    | 1946    |
| Aae-1-3379 | NW_001810830.1 | + | 908877  | 908929  |
| Aae-1-3380 | NW_001811045.1 | - | 366070  | 366017  |
| Aae-1-3381 | NW_001810782.1 | + | 4429779 | 4429831 |
| Aae-1-3382 | NW_001810837.1 | - | 2321471 | 2321419 |
| Aae-1-3383 | NW_001809915.1 | + | 55414   | 55466   |
| Aae-1-3384 | NW_001811024.1 | + | 361711  | 361763  |
| Aae-1-3385 | NW_001811470.1 | + | 37675   | 37727   |
| Aae-1-3386 | NW_001811079.1 | - | 681609  | 681557  |
| Aae-1-3387 | NW_001811478.1 | - | 262770  | 262718  |
| Aae-1-3388 | NW_001811064.1 | + | 1112500 | 1112552 |
| Aae-1-3389 | NW_001810275.1 | + | 668281  | 668333  |
| Aae-1-3390 | NW_001811319.1 | + | 189540  | 189592  |
| Aae-1-3391 | NW_001811351.1 | - | 903847  | 903795  |
| Aae-1-3392 | NW_001811119.1 | - | 412442  | 412390  |
| Aae-1-3393 | NW_001811115.1 | - | 611690  | 611638  |
| Aae-1-3394 | NW_001811039.1 | + | 880193  | 880245  |
| Aae-1-3395 | NW_001811017.1 | - | 610151  | 610099  |
| Aae-1-3396 | NW_001810974.1 | + | 556556  | 556608  |
| Aae-1-3397 | NW_001811504.1 | - | 484413  | 484359  |
| Aae-1-3398 | NW_001811647.1 | - | 212537  | 212483  |
| Aae-1-3399 | NW_001810950.1 | + | 1184148 | 1184202 |
| Aae-1-3400 | NW_001810648.1 | + | 645324  | 645378  |
| Aae-1-3401 | NW_001810232.1 | + | 101184  | 101238  |
| Aae-1-3402 | NW_001810920.1 | + | 62256   | 62310   |
| Aae-1-3403 | NW_001811029.1 | + | 836293  | 836347  |
| Aae-1-3404 | NW_001811040.1 | + | 1219365 | 1219419 |
| Aae-1-3405 | NW_001811201.1 | - | 439514  | 439460  |
| Aae-1-3406 | NW_001811662.1 | + | 2337220 | 2337274 |
| Aae-1-3407 | NW_001810111.1 | - | 826117  | 826063  |
| Aae-1-3408 | NW_001809961.1 | - | 26314   | 26260   |
| Aae-1-3409 | NW_001810519.1 | - | 491819  | 491765  |
| Aae-1-3410 | NW_001811207.1 | + | 1943249 | 1943303 |
| Aae-1-3411 | NW_001811607.1 | + | 488516  | 488570  |
| Aae-1-3412 | NW_001811684.1 | + | 3963179 | 3963233 |
| Aae-1-3413 | NW_001811757.1 | - | 162265  | 162211  |

|            |                |   |         |         |
|------------|----------------|---|---------|---------|
| Aae-1-3414 | NW_001811764.1 | + | 312105  | 312159  |
| Aae-1-3415 | NW_001811772.1 | + | 2066628 | 2066682 |
| Aae-1-3416 | NW_001811242.1 | - | 297911  | 297857  |
| Aae-1-3417 | NW_001811217.1 | + | 801595  | 801649  |
| Aae-1-3418 | NW_001811147.1 | + | 1103978 | 1104032 |
| Aae-1-3419 | NW_001810696.1 | + | 1292719 | 1292773 |
| Aae-1-3420 | NW_001810647.1 | + | 34331   | 34385   |
| Aae-1-3421 | NW_001810264.1 | - | 2111285 | 2111231 |
| Aae-1-3422 | NW_001810436.1 | - | 630053  | 629999  |
| Aae-1-3423 | NW_001811225.1 | + | 371716  | 371770  |
| Aae-1-3424 | NW_001810350.1 | + | 1831642 | 1831696 |
| Aae-1-3425 | NW_001811261.1 | - | 354052  | 353998  |
| Aae-1-3426 | NW_001811153.1 | + | 798190  | 798244  |
| Aae-1-3427 | NW_001811112.1 | - | 15275   | 15221   |
| Aae-1-3428 | NW_001811109.1 | + | 1089428 | 1089482 |
| Aae-1-3429 | NW_001811033.1 | + | 343829  | 343883  |
| Aae-1-3430 | NW_001809803.1 | + | 2333239 | 2333293 |
| Aae-1-3431 | NW_001810022.1 | - | 2140558 | 2140504 |
| Aae-1-3432 | NW_001810458.1 | - | 3017501 | 3017447 |
| Aae-1-3433 | NW_001810555.1 | - | 4306081 | 4306027 |
| Aae-1-3434 | NW_001810675.1 | + | 101663  | 101717  |
| Aae-1-3435 | NW_001810838.1 | - | 803692  | 803638  |
| Aae-1-3436 | NW_001811385.1 | - | 1265123 | 1265069 |
| Aae-1-3437 | NW_001810616.1 | - | 1564708 | 1564654 |
| Aae-1-3438 | NW_001810935.1 | + | 473207  | 473261  |
| Aae-1-3439 | NW_001810955.1 | - | 1573689 | 1573635 |
| Aae-1-3440 | NW_001810696.1 | - | 590745  | 590691  |
| Aae-1-3441 | NW_001811373.1 | + | 89628   | 89682   |
| Aae-1-3442 | NW_001810447.1 | - | 255024  | 254970  |
| Aae-1-3443 | NW_001810508.1 | + | 771349  | 771403  |
| Aae-1-3444 | NW_001810795.1 | + | 496202  | 496256  |
| Aae-1-3445 | NW_001810666.1 | + | 1163358 | 1163412 |
| Aae-1-3446 | NW_001810050.1 | + | 112812  | 112866  |
| Aae-1-3447 | NW_001809901.1 | + | 301602  | 301656  |
| Aae-1-3448 | NW_001811252.1 | + | 381505  | 381559  |
| Aae-1-3449 | NW_001811316.1 | + | 125106  | 125160  |
| Aae-1-3450 | NW_001809803.1 | - | 514126  | 514072  |
| Aae-1-3451 | NW_001810980.1 | - | 577429  | 577375  |
| Aae-1-3452 | NW_001809803.1 | - | 2131573 | 2131519 |
| Aae-1-3453 | NW_001811044.1 | + | 987194  | 987248  |
| Aae-1-3454 | NW_001810963.1 | + | 1262619 | 1262673 |
| Aae-1-3455 | NW_001811457.1 | + | 346576  | 346627  |
| Aae-1-3456 | NW_001810019.1 | + | 141417  | 141471  |
| Aae-1-3457 | NW_001811418.1 | + | 2583945 | 2583999 |
| Aae-1-3458 | NW_001811462.1 | - | 3135760 | 3135706 |
| Aae-1-3459 | NW_001811545.1 | + | 114669  | 114723  |
| Aae-1-3460 | NW_001811334.1 | - | 697759  | 697704  |
| Aae-1-3461 | NW_001811761.1 | - | 310187  | 310133  |
| Aae-1-3462 | NW_001811224.1 | - | 637266  | 637214  |
| Aae-1-3463 | NW_001811152.1 | + | 856145  | 856197  |
| Aae-1-3464 | NW_001811662.1 | + | 1400393 | 1400445 |
| Aae-1-3465 | NW_001811269.1 | - | 941754  | 941702  |

|            |                |   |         |         |
|------------|----------------|---|---------|---------|
| Aae-1-3466 | NW_001811241.1 | - | 738378  | 738326  |
| Aae-1-3467 | NW_001810783.1 | - | 3410396 | 3410344 |
| Aae-1-3468 | NW_001809957.1 | + | 968321  | 968373  |
| Aae-1-3469 | NW_001810783.1 | - | 2577294 | 2577242 |
| Aae-1-3470 | NW_001810051.1 | - | 2438    | 2386    |
| Aae-1-3471 | NW_001811542.1 | - | 60695   | 60643   |
| Aae-1-3472 | NW_001809801.1 | - | 2841208 | 2841156 |
| Aae-1-3473 | NW_001811183.1 | - | 308596  | 308544  |
| Aae-1-3474 | NW_001810537.1 | - | 1839565 | 1839513 |
| Aae-1-3475 | NW_001810328.1 | + | 1493832 | 1493884 |
| Aae-1-3476 | NW_001810156.1 | - | 1826661 | 1826609 |
| Aae-1-3477 | NW_001811281.1 | + | 273924  | 273976  |
| Aae-1-3478 | NW_001810307.1 | + | 2118800 | 2118852 |
| Aae-1-3479 | NW_001811211.1 | + | 124646  | 124698  |
| Aae-1-3480 | NW_001810805.1 | - | 868672  | 868620  |
| Aae-1-3481 | NW_001811377.1 | + | 545543  | 545595  |
| Aae-1-3482 | NW_001810913.1 | + | 1685678 | 1685730 |
| Aae-1-3483 | NW_001811168.1 | + | 893523  | 893575  |
| Aae-1-3484 | NW_001810967.1 | + | 362000  | 362052  |
| Aae-1-3485 | NW_001811218.1 | - | 3100166 | 3100114 |
| Aae-1-3486 | NW_001811093.1 | + | 670342  | 670394  |
| Aae-1-3487 | NW_001811007.1 | + | 2313028 | 2313080 |
| Aae-1-3488 | NW_001810714.1 | - | 1701680 | 1701628 |
| Aae-1-3489 | NW_001810996.1 | + | 455265  | 455317  |
| Aae-1-3490 | NW_001811084.1 | + | 668009  | 668061  |
| Aae-1-3491 | NW_001811285.1 | + | 3085544 | 3085596 |
| Aae-1-3492 | NW_001811483.1 | - | 347687  | 347635  |
| Aae-1-3493 | NW_001811640.1 | - | 1448037 | 1447985 |
| Aae-1-3494 | NW_001810078.1 | + | 921737  | 921789  |
| Aae-1-3495 | NW_001810960.1 | - | 237013  | 236961  |
| Aae-1-3496 | NW_001811514.1 | + | 410784  | 410836  |
| Aae-1-3497 | NW_001811130.1 | + | 1553851 | 1553903 |
| Aae-1-3498 | NW_001810296.1 | - | 1639659 | 1639607 |
| Aae-1-3499 | NW_001810984.1 | + | 3057276 | 3057328 |
| Aae-1-3500 | NW_001811252.1 | + | 1084858 | 1084910 |
| Aae-1-3501 | NW_001811288.1 | + | 622379  | 622431  |
| Aae-1-3502 | NW_001811351.1 | - | 3863650 | 3863598 |
| Aae-1-3503 | NW_001811462.1 | + | 2367418 | 2367470 |
| Aae-1-3504 | NW_001811077.1 | - | 392219  | 392167  |
| Aae-1-3505 | NW_001811083.1 | - | 339405  | 339353  |
| Aae-1-3506 | NW_001811385.1 | - | 2417066 | 2417014 |
| Aae-1-3507 | NW_001811578.1 | + | 176248  | 176300  |
| Aae-1-3508 | NW_001811651.1 | - | 1239276 | 1239222 |
| Aae-1-3509 | NW_001811263.1 | - | 2947676 | 2947624 |
| Aae-1-3510 | NW_001811717.1 | - | 298570  | 298517  |
| Aae-1-3511 | NW_001811655.1 | + | 123844  | 123896  |
| Aae-1-3512 | NW_001811054.1 | - | 430801  | 430749  |
| Aae-1-3513 | NW_001810837.1 | - | 2296554 | 2296502 |
| Aae-1-3514 | NW_001811309.1 | + | 764018  | 764070  |
| Aae-1-3515 | NW_001809854.1 | - | 51835   | 51783   |
| Aae-1-3516 | NW_001809901.1 | - | 1304965 | 1304913 |
| Aae-1-3517 | NW_001810190.1 | - | 34429   | 34377   |

|            |                |   |         |         |
|------------|----------------|---|---------|---------|
| Aae-1-3518 | NW_001810275.1 | + | 1575248 | 1575300 |
| Aae-1-3519 | NW_001810805.1 | - | 872123  | 872071  |
| Aae-1-3520 | NW_001811008.1 | + | 1362589 | 1362641 |
| Aae-1-3521 | NW_001811028.1 | + | 767211  | 767263  |
| Aae-1-3522 | NW_001811607.1 | - | 2475817 | 2475765 |
| Aae-1-3523 | NW_001811696.1 | - | 1216322 | 1216270 |
| Aae-1-3524 | NW_001809992.1 | - | 27254   | 27202   |
| Aae-1-3525 | NW_001811512.1 | - | 426452  | 426400  |
| Aae-1-3526 | NW_001811619.1 | + | 137050  | 137102  |
| Aae-1-3527 | NW_001811063.1 | - | 3132410 | 3132354 |
| Aae-1-3528 | NW_001810211.1 | - | 441266  | 441214  |
| Aae-1-3529 | NW_001810638.1 | + | 1267911 | 1267963 |
| Aae-1-3530 | NW_001810656.1 | + | 189931  | 189983  |
| Aae-1-3531 | NW_001811079.1 | + | 670382  | 670434  |
| Aae-1-3532 | NW_001810891.1 | + | 456783  | 456837  |
| Aae-1-3533 | NW_001811603.1 | - | 376734  | 376682  |
| Aae-1-3534 | NW_001811569.1 | + | 175801  | 175853  |
| Aae-1-3535 | NW_001811514.1 | - | 293260  | 293208  |
| Aae-1-3536 | NW_001811260.1 | + | 773723  | 773775  |
| Aae-1-3537 | NW_001811429.1 | - | 748615  | 748561  |
| Aae-1-3538 | NW_001811385.1 | + | 143446  | 143500  |
| Aae-1-3539 | NW_001810078.1 | - | 2243434 | 2243382 |
| Aae-1-3540 | NW_001810459.1 | - | 1949790 | 1949738 |
| Aae-1-3541 | NW_001810791.1 | - | 1469286 | 1469234 |
| Aae-1-3542 | NW_001811116.1 | + | 784463  | 784515  |
| Aae-1-3543 | NW_001811440.1 | - | 2214940 | 2214888 |
| Aae-1-3544 | NW_001810458.1 | - | 2613706 | 2613654 |
| Aae-1-3545 | NW_001810995.1 | - | 370958  | 370906  |
| Aae-1-3546 | NW_001810976.1 | - | 382279  | 382227  |
| Aae-1-3547 | NW_001811385.1 | + | 504876  | 504928  |
| Aae-1-3548 | NW_001811481.1 | - | 319573  | 319519  |
| Aae-1-3549 | NW_001811205.1 | - | 722380  | 722326  |
| Aae-1-3550 | NW_001811096.1 | - | 2796203 | 2796151 |
| Aae-1-3551 | NW_001811462.1 | + | 4052076 | 4052128 |
| Aae-1-3552 | NW_001810318.1 | + | 1082425 | 1082477 |
| Aae-1-3553 | NW_001810339.1 | - | 1240405 | 1240353 |
| Aae-1-3554 | NW_001811331.1 | + | 616027  | 616079  |
| Aae-1-3555 | NW_001810350.1 | - | 1831625 | 1831573 |
| Aae-1-3556 | NW_001810392.1 | + | 912084  | 912136  |
| Aae-1-3557 | NW_001810537.1 | + | 1013465 | 1013517 |
| Aae-1-3558 | NW_001810919.1 | - | 356565  | 356513  |
| Aae-1-3559 | NW_001810955.1 | + | 3622349 | 3622401 |
| Aae-1-3560 | NW_001810966.1 | - | 1231742 | 1231690 |
| Aae-1-3561 | NW_001811120.1 | + | 160575  | 160627  |
| Aae-1-3562 | NW_001811633.1 | + | 36550   | 36602   |
| Aae-1-3563 | NW_001810990.1 | - | 76489   | 76437   |
| Aae-1-3564 | NW_001810805.1 | + | 1255820 | 1255872 |
| Aae-1-3565 | NW_001810750.1 | - | 848710  | 848658  |
| Aae-1-3566 | NW_001810623.1 | - | 1206586 | 1206534 |
| Aae-1-3567 | NW_001811098.1 | - | 810350  | 810298  |
| Aae-1-3568 | NW_001810231.1 | + | 68929   | 68981   |
| Aae-1-3569 | NW_001810102.1 | + | 81649   | 81701   |

|            |                |   |         |         |
|------------|----------------|---|---------|---------|
| Aae-1-3570 | NW_001811185.1 | + | 1793404 | 1793456 |
| Aae-1-3571 | NW_001810022.1 | - | 900652  | 900600  |
| Aae-1-3572 | NW_001811065.1 | - | 784670  | 784618  |
| Aae-1-3573 | NW_001811546.1 | - | 292773  | 292721  |
| Aae-1-3574 | NW_001809801.1 | - | 4716282 | 4716230 |
| Aae-1-3575 | NW_001810575.1 | - | 662974  | 662922  |
| Aae-1-3576 | NW_001810425.1 | - | 1159039 | 1158981 |
| Aae-1-3577 | NW_001809825.1 | - | 1191141 | 1191089 |
| Aae-1-3578 | NW_001810425.1 | + | 376542  | 376594  |
| Aae-1-3579 | NW_001811130.1 | - | 1650285 | 1650233 |
| Aae-1-3580 | NW_001811607.1 | - | 488210  | 488158  |
| Aae-1-3581 | NW_001811694.1 | - | 203675  | 203623  |
| Aae-1-3582 | NW_001811703.1 | + | 207286  | 207338  |
| Aae-1-3583 | NW_001809913.1 | - | 2460008 | 2459956 |
| Aae-1-3584 | NW_001810666.1 | - | 1047603 | 1047551 |
| Aae-1-3585 | NW_001811063.1 | + | 2577454 | 2577506 |
| Aae-1-3586 | NW_001811096.1 | - | 2992456 | 2992404 |
| Aae-1-3587 | NW_001811158.1 | + | 983640  | 983692  |
| Aae-1-3588 | NW_001811431.1 | + | 460969  | 461021  |
| Aae-1-3589 | NW_001810575.1 | + | 842724  | 842776  |
| Aae-1-3590 | NW_001811764.1 | - | 311379  | 311327  |
| Aae-1-3591 | NW_001810995.1 | - | 733245  | 733191  |
| Aae-1-3592 | NW_001811297.1 | - | 904749  | 904695  |
| Aae-1-3593 | NW_001811116.1 | - | 786278  | 786224  |
| Aae-1-3594 | NW_001811173.1 | + | 511685  | 511739  |
| Aae-1-3595 | NW_001810984.1 | + | 221365  | 221419  |
| Aae-1-3596 | NW_001811010.1 | - | 1154143 | 1154089 |
| Aae-1-3597 | NW_001811407.1 | + | 644274  | 644328  |
| Aae-1-3598 | NW_001811288.1 | - | 397739  | 397685  |
| Aae-1-3599 | NW_001811271.1 | - | 114309  | 114255  |
| Aae-1-3600 | NW_001810078.1 | + | 183260  | 183314  |
| Aae-1-3601 | NW_001810714.1 | - | 2411937 | 2411883 |
| Aae-1-3602 | NW_001811651.1 | + | 1707475 | 1707529 |
| Aae-1-3603 | NW_001811346.1 | - | 363719  | 363668  |
| Aae-1-3604 | NW_001811394.1 | - | 642776  | 642729  |
| Aae-1-3605 | NW_001811282.1 | + | 572520  | 572574  |
| Aae-1-3606 | NW_001811346.1 | + | 342697  | 342751  |
| Aae-1-3607 | NW_001811354.1 | - | 127136  | 127082  |
| Aae-1-3608 | NW_001811783.1 | - | 465798  | 465744  |
| Aae-1-3609 | NW_001810242.1 | - | 2795867 | 2795816 |
| Aae-1-3610 | NW_001836342.1 | - | 6588    | 6533    |
| Aae-1-3611 | NW_001810318.1 | - | 2118890 | 2118836 |
| Aae-1-3612 | NW_001811004.1 | - | 1259238 | 1259184 |
| Aae-1-3613 | NW_001810955.1 | + | 1301808 | 1301862 |
| Aae-1-3614 | NW_001811159.1 | + | 916308  | 916362  |
| Aae-1-3615 | NW_001809901.1 | - | 2354308 | 2354254 |
| Aae-1-3616 | NW_001810952.1 | + | 157414  | 157464  |
| Aae-1-3617 | NW_001809834.1 | + | 162833  | 162886  |
| Aae-1-3618 | NW_001811529.1 | + | 50820   | 50873   |
| Aae-1-3619 | NW_001810381.1 | - | 992148  | 992094  |
| Aae-1-3620 | NW_001811562.1 | + | 765522  | 765576  |
| Aae-1-3621 | NW_001811068.1 | - | 235150  | 235096  |

|            |                |   |         |         |
|------------|----------------|---|---------|---------|
| Aae-1-3622 | NW_001810350.1 | - | 2912553 | 2912499 |
| Aae-1-3623 | NW_001811063.1 | + | 3248757 | 3248811 |
| Aae-1-3624 | NW_001810480.1 | - | 2058116 | 2058062 |
| Aae-1-3625 | NW_001810459.1 | + | 1615410 | 1615464 |
| Aae-1-3626 | NW_001811031.1 | - | 693079  | 693025  |
| Aae-1-3627 | NW_001810243.1 | + | 658339  | 658393  |
| Aae-1-3628 | NW_001810648.1 | - | 539861  | 539807  |
| Aae-1-3629 | NW_001810999.1 | + | 489080  | 489134  |
| Aae-1-3630 | NW_001810231.1 | - | 620695  | 620641  |
| Aae-1-3631 | NW_001809946.1 | + | 579579  | 579633  |
| Aae-1-3632 | NW_001811769.1 | + | 132167  | 132221  |
| Aae-1-3633 | NW_001811250.1 | - | 409333  | 409279  |
| Aae-1-3634 | NW_001809901.1 | - | 1322964 | 1322912 |
| Aae-1-3635 | NW_001810656.1 | + | 1032550 | 1032600 |
| Aae-1-3636 | NW_001810688.1 | - | 199661  | 199609  |
| Aae-1-3637 | NW_001810242.1 | + | 526047  | 526100  |
| Aae-1-3638 | NW_001810714.1 | - | 2539509 | 2539456 |
| Aae-1-3639 | NW_001811003.1 | + | 269536  | 269590  |
| Aae-1-3640 | NW_001811051.1 | - | 444150  | 444096  |
| Aae-1-3641 | NW_001811158.1 | + | 916317  | 916372  |
| Aae-1-3642 | NW_001811201.1 | - | 383483  | 383429  |
| Aae-1-3643 | NW_001811596.1 | + | 1010364 | 1010416 |
| Aae-1-3644 | NW_001811352.1 | + | 664953  | 665007  |
| Aae-1-3645 | NW_001811318.1 | + | 2307072 | 2307126 |
| Aae-1-3646 | NW_001811485.1 | + | 2584244 | 2584298 |
| Aae-1-3647 | NW_001811443.1 | + | 267023  | 267077  |
| Aae-1-3648 | NW_001811016.1 | + | 19483   | 19537   |
| Aae-1-3649 | NW_001811074.1 | - | 3480340 | 3480286 |
| Aae-1-3650 | NW_001811067.1 | - | 749831  | 749777  |
| Aae-1-3651 | NW_001811022.1 | - | 220795  | 220741  |
| Aae-1-3652 | NW_001810997.1 | + | 21439   | 21493   |
| Aae-1-3653 | NW_001810984.1 | + | 3100509 | 3100563 |
| Aae-1-3654 | NW_001810852.1 | + | 57449   | 57503   |
| Aae-1-3655 | NW_001810656.1 | + | 1863632 | 1863686 |
| Aae-1-3656 | NW_001810242.1 | + | 4256694 | 4256748 |
| Aae-1-3657 | NW_001811134.1 | + | 1074468 | 1074522 |
| Aae-1-3658 | NW_001810069.1 | + | 76099   | 76153   |
| Aae-1-3659 | NW_001810864.1 | - | 5058    | 5004    |
| Aae-1-3660 | NW_001810067.1 | - | 937294  | 937240  |
| Aae-1-3661 | NW_001809801.1 | + | 3651648 | 3651702 |
| Aae-1-3662 | NW_001811398.1 | + | 589609  | 589675  |
| Aae-1-3663 | NW_001811398.1 | - | 584866  | 584800  |
| Aae-1-3664 | NW_001811027.1 | + | 51861   | 51915   |
| Aae-1-3665 | NW_001811306.1 | - | 505201  | 505147  |
| Aae-1-3666 | NW_001811150.1 | + | 64623   | 64675   |
| Aae-1-3667 | NW_001811638.1 | + | 145728  | 145782  |
| Aae-1-3668 | NW_001811638.1 | - | 145719  | 145665  |
| Aae-1-3669 | NW_001811629.1 | + | 2009211 | 2009265 |
| Aae-1-3670 | NW_001811440.1 | + | 1410055 | 1410109 |
| Aae-1-3671 | NW_001811142.1 | + | 1176644 | 1176698 |
| Aae-1-3672 | NW_001811284.1 | + | 785037  | 785091  |
| Aae-1-3673 | NW_001811250.1 | - | 105364  | 105310  |



|            |                |   |         |         |
|------------|----------------|---|---------|---------|
| Aae-1-3674 | NW_001811329.1 | + | 1719503 | 1719557 |
| Aae-1-3675 | NW_001837310.1 | - | 5710    | 5656    |
| Aae-1-3676 | NW_001811213.1 | + | 397542  | 397596  |
| Aae-1-3677 | NW_001810837.1 | + | 1784038 | 1784092 |
| Aae-1-3678 | NW_001811351.1 | - | 4993119 | 4993065 |
| Aae-1-3679 | NW_001811185.1 | + | 39466   | 39520   |
| Aae-1-3680 | NW_001811183.1 | + | 23838   | 23892   |
| Aae-1-3681 | NW_001811152.1 | - | 2562249 | 2562195 |
| Aae-1-3682 | NW_001811145.1 | + | 70129   | 70183   |
| Aae-1-3683 | NW_001811129.1 | + | 2451179 | 2451233 |
| Aae-1-3684 | NW_001811118.1 | - | 2209523 | 2209469 |
| Aae-1-3685 | NW_001811117.1 | - | 282149  | 282095  |
| Aae-1-3686 | NW_001811107.1 | + | 1682271 | 1682325 |
| Aae-1-3687 | NW_001811090.1 | + | 698847  | 698901  |
| Aae-1-3688 | NW_001811055.1 | + | 732879  | 732933  |
| Aae-1-3689 | NW_001811005.1 | + | 1224781 | 1224835 |
| Aae-1-3690 | NW_001810981.1 | + | 1562834 | 1562888 |
| Aae-1-3691 | NW_001810958.1 | - | 1098396 | 1098342 |
| Aae-1-3692 | NW_001810912.1 | - | 1378285 | 1378231 |
| Aae-1-3693 | NW_001810893.1 | + | 1351430 | 1351484 |
| Aae-1-3694 | NW_001810837.1 | - | 2490434 | 2490380 |
| Aae-1-3695 | NW_001810795.1 | + | 1584630 | 1584684 |
| Aae-1-3696 | NW_001810637.1 | - | 14689   | 14635   |
| Aae-1-3697 | NW_001810459.1 | + | 485846  | 485900  |
| Aae-1-3698 | NW_001810381.1 | + | 247145  | 247199  |
| Aae-1-3699 | NW_001810361.1 | - | 1568598 | 1568544 |
| Aae-1-3700 | NW_001810200.1 | - | 1108085 | 1108031 |
| Aae-1-3701 | NW_001810191.1 | + | 75848   | 75902   |
| Aae-1-3702 | NW_001810178.1 | + | 1732437 | 1732491 |
| Aae-1-3703 | NW_001810143.1 | - | 88304   | 88250   |
| Aae-1-3704 | NW_001810132.1 | + | 126597  | 126651  |
| Aae-1-3705 | NW_001810022.1 | - | 2384514 | 2384459 |
| Aae-1-3706 | NW_001810003.1 | + | 54580   | 54634   |
| Aae-1-3707 | NW_001809844.1 | + | 275699  | 275753  |
| Aae-1-3708 | NW_001809836.1 | + | 1699432 | 1699486 |
| Aae-1-3709 | NW_001811393.1 | + | 158435  | 158489  |
| Aae-1-3710 | NW_001811672.1 | + | 1201    | 1255    |
| Aae-1-3711 | NW_001811292.1 | - | 189229  | 189179  |
| Aae-1-3712 | NW_001811103.1 | + | 25263   | 25317   |
| Aae-1-3713 | NW_001811085.1 | - | 3355210 | 3355156 |
| Aae-1-3714 | NW_001811046.1 | + | 523063  | 523117  |
| Aae-1-3715 | NW_001811031.1 | - | 681494  | 681439  |
| Aae-1-3716 | NW_001811005.1 | - | 1358116 | 1358062 |
| Aae-1-3717 | NW_001810898.1 | + | 742033  | 742087  |
| Aae-1-3718 | NW_001810782.1 | - | 230306  | 230254  |
| Aae-1-3719 | NW_001810459.1 | - | 2264459 | 2264405 |
| Aae-1-3720 | NW_001811703.1 | - | 272292  | 272237  |
| Aae-1-3721 | NW_001811518.1 | - | 1333532 | 1333478 |
| Aae-1-3722 | NW_001811684.1 | + | 1918801 | 1918855 |
| Aae-1-3723 | NW_001811329.1 | + | 2492624 | 2492678 |
| Aae-1-3724 | NW_001811203.1 | - | 377868  | 377815  |
| Aae-1-3725 | NW_001811222.1 | + | 605060  | 605113  |

|            |                |   |         |         |
|------------|----------------|---|---------|---------|
| Aae-1-3726 | NW_001810527.1 | - | 1498434 | 1498380 |
| Aae-1-3727 | NW_001810490.1 | - | 1698000 | 1697946 |
| Aae-1-3728 | NW_001810078.1 | - | 367176  | 367122  |
| Aae-1-3729 | NW_001810000.1 | - | 1700666 | 1700612 |
| Aae-1-3730 | NW_001810953.1 | + | 102976  | 103028  |
| Aae-1-3731 | NW_001811040.1 | + | 1167889 | 1167943 |
| Aae-1-3732 | NW_001811108.1 | - | 193331  | 193278  |
| Aae-1-3733 | NW_001811463.1 | + | 1591435 | 1591489 |
| Aae-1-3734 | NW_001809964.1 | + | 18577   | 18631   |
| Aae-1-3735 | NW_001811077.1 | - | 384720  | 384665  |
| Aae-1-3736 | NW_001809838.1 | - | 57238   | 57184   |
| Aae-1-3737 | NW_001811129.1 | + | 190367  | 190421  |
| Aae-1-3738 | NW_001810708.1 | + | 1477887 | 1477941 |
| Aae-1-3739 | NW_001811776.1 | - | 295248  | 295194  |
| Aae-1-3740 | NW_001811578.1 | - | 331811  | 331757  |
| Aae-1-3741 | NW_001811440.1 | + | 1532818 | 1532872 |
| Aae-1-3742 | NW_001811441.1 | + | 481104  | 481158  |
| Aae-1-3743 | NW_001811307.1 | + | 188194  | 188248  |
| Aae-1-3744 | NW_001811363.1 | + | 1384819 | 1384873 |
| Aae-1-3745 | NW_001811220.1 | + | 556508  | 556563  |
| Aae-1-3746 | NW_001810939.1 | - | 472089  | 472035  |
| Aae-1-3747 | NW_001811163.1 | + | 1764620 | 1764674 |
| Aae-1-3748 | NW_001811088.1 | - | 370753  | 370699  |
| Aae-1-3749 | NW_001811017.1 | - | 354433  | 354379  |
| Aae-1-3750 | NW_001809816.1 | + | 184838  | 184892  |
| Aae-1-3751 | NW_001810998.1 | - | 1424202 | 1424148 |
| Aae-1-3752 | NW_001811071.1 | + | 891072  | 891126  |
| Aae-1-3753 | NW_001810982.1 | - | 972386  | 972332  |
| Aae-1-3754 | NW_001810111.1 | - | 1888056 | 1888002 |
| Aae-1-3755 | NW_001810447.1 | - | 1765460 | 1765406 |
| Aae-1-3756 | NW_001810912.1 | + | 2340556 | 2340610 |
| Aae-1-3757 | NW_001811141.1 | + | 1366090 | 1366144 |
| Aae-1-3758 | NW_001811778.1 | - | 29818   | 29764   |
| Aae-1-3759 | NW_001810971.1 | - | 1275267 | 1275213 |
| Aae-1-3760 | NW_001810855.1 | + | 107758  | 107812  |
| Aae-1-3761 | NW_001811618.1 | - | 1181119 | 1181065 |
| Aae-1-3762 | NW_001811196.1 | + | 2728458 | 2728512 |
| Aae-1-3763 | NW_001811009.1 | - | 364902  | 364841  |
| Aae-1-3764 | NW_001811329.1 | - | 2234170 | 2234116 |
| Aae-1-3765 | NW_001811429.1 | - | 2475458 | 2475404 |
| Aae-1-3766 | NW_001811277.1 | - | 564232  | 564178  |
| Aae-1-3767 | NW_001811021.1 | - | 1309513 | 1309459 |
| Aae-1-3768 | NW_001810980.1 | - | 430556  | 430502  |
| Aae-1-3769 | NW_001810913.1 | + | 401848  | 401902  |
| Aae-1-3770 | NW_001810947.1 | + | 1047797 | 1047851 |
| Aae-1-3771 | NW_001811124.1 | + | 156031  | 156085  |
| Aae-1-3772 | NW_001811163.1 | + | 1139886 | 1139940 |
| Aae-1-3773 | NW_001811185.1 | - | 2392492 | 2392438 |
| Aae-1-3774 | NW_001811396.1 | - | 2501420 | 2501366 |
| Aae-1-3775 | NW_001811065.1 | + | 828862  | 828916  |
| Aae-1-3776 | NW_001810816.1 | + | 1596052 | 1596106 |
| Aae-1-3777 | NW_001810909.1 | + | 1154687 | 1154741 |

|            |                |   |         |         |
|------------|----------------|---|---------|---------|
| Aae-1-3778 | NW_001811498.1 | + | 2258    | 2312    |
| Aae-1-3779 | NW_001811096.1 | + | 1312346 | 1312400 |
| Aae-1-3780 | NW_001809945.1 | - | 200986  | 200932  |
| Aae-1-3781 | NW_001810078.1 | + | 367326  | 367380  |
| Aae-1-3782 | NW_001810242.1 | + | 346696  | 346750  |
| Aae-1-3783 | NW_001810782.1 | + | 667771  | 667825  |
| Aae-1-3784 | NW_001811456.1 | + | 320577  | 320631  |
| Aae-1-3785 | NW_001809857.1 | + | 458123  | 458177  |
| Aae-1-3786 | NW_001811129.1 | - | 3057141 | 3057087 |
| Aae-1-3787 | NW_001809912.1 | - | 2618072 | 2618018 |
| Aae-1-3788 | NW_001811585.1 | + | 828783  | 828837  |
| Aae-1-3789 | NW_001811360.1 | + | 531251  | 531305  |
| Aae-1-3790 | NW_001810350.1 | - | 3826093 | 3826039 |
| Aae-1-3791 | NW_001810927.1 | + | 405694  | 405748  |
| Aae-1-3792 | NW_001811055.1 | - | 1015334 | 1015280 |
| Aae-1-3793 | NW_001811743.1 | - | 121367  | 121313  |
| Aae-1-3794 | NW_001811573.1 | - | 3199851 | 3199797 |
| Aae-1-3795 | NW_001811739.1 | - | 274476  | 274422  |
| Aae-1-3796 | NW_001811739.1 | - | 2344734 | 2344680 |
| Aae-1-3797 | NW_001811662.1 | - | 1960028 | 1959974 |
| Aae-1-3798 | NW_001810964.1 | + | 741868  | 741922  |
| Aae-1-3799 | NW_001811448.1 | - | 408546  | 408492  |
| Aae-1-3800 | NW_001811613.1 | + | 35976   | 36030   |
| Aae-1-3801 | NW_001811448.1 | - | 122388  | 122334  |
| Aae-1-3802 | NW_001811251.1 | - | 28642   | 28588   |
| Aae-1-3803 | NW_001811096.1 | - | 2726545 | 2726491 |
| Aae-1-3804 | NW_001810404.1 | + | 47262   | 47316   |
| Aae-1-3805 | NW_001809801.1 | - | 1476087 | 1476033 |
| Aae-1-3806 | NW_001810242.1 | - | 1493338 | 1493284 |
| Aae-1-3807 | NW_001810459.1 | - | 1553846 | 1553792 |
| Aae-1-3808 | NW_001810984.1 | - | 717599  | 717545  |
| Aae-1-3809 | NW_001811122.1 | - | 457009  | 456955  |
| Aae-1-3810 | NW_001811274.1 | - | 1191066 | 1191012 |
| Aae-1-3811 | NW_001811562.1 | - | 48373   | 48319   |
| Aae-1-3812 | NW_001810006.1 | + | 21455   | 21509   |
| Aae-1-3813 | NW_001809825.1 | - | 2275293 | 2275239 |
| Aae-1-3814 | NW_001811314.1 | + | 513818  | 513872  |
| Aae-1-3815 | NW_001810001.1 | - | 102824  | 102770  |
| Aae-1-3816 | NW_001810178.1 | - | 1901254 | 1901200 |
| Aae-1-3817 | NW_001810133.1 | - | 391953  | 391899  |
| Aae-1-3818 | NW_001810459.1 | - | 2242624 | 2242570 |
| Aae-1-3819 | NW_001811240.1 | + | 1478733 | 1478787 |
| Aae-1-3820 | NW_001811066.1 | - | 928168  | 928114  |
| Aae-1-3821 | NW_001810970.1 | - | 3576129 | 3576075 |
| Aae-1-3822 | NW_001811029.1 | + | 326174  | 326228  |
| Aae-1-3823 | NW_001811164.1 | + | 81893   | 81947   |
| Aae-1-3824 | NW_001811533.1 | - | 341080  | 341026  |
| Aae-1-3825 | NW_001810373.1 | + | 53437   | 53491   |
| Aae-1-3826 | NW_001810847.1 | - | 399512  | 399458  |
| Aae-1-3827 | NW_001811433.1 | - | 126959  | 126905  |
| Aae-1-3828 | NW_001811576.1 | + | 137817  | 137871  |
| Aae-1-3829 | NW_001811562.1 | + | 1808573 | 1808627 |

|            |                |   |         |         |
|------------|----------------|---|---------|---------|
| Aae-1-3830 | NW_001811535.1 | + | 346512  | 346566  |
| Aae-1-3831 | NW_001811433.1 | - | 217259  | 217205  |
| Aae-1-3832 | NW_001811340.1 | - | 2677611 | 2677557 |
| Aae-1-3833 | NW_001811226.1 | - | 317246  | 317192  |
| Aae-1-3834 | NW_001811201.1 | - | 642194  | 642140  |
| Aae-1-3835 | NW_001811196.1 | - | 3178952 | 3178898 |
| Aae-1-3836 | NW_001811179.1 | - | 320601  | 320547  |
| Aae-1-3837 | NW_001811163.1 | - | 3040365 | 3040311 |
| Aae-1-3838 | NW_001811225.1 | + | 435064  | 435118  |
| Aae-1-3839 | NW_001811150.1 | + | 661349  | 661403  |
| Aae-1-3840 | NW_001811149.1 | + | 164262  | 164316  |
| Aae-1-3841 | NW_001811120.1 | + | 401141  | 401195  |
| Aae-1-3842 | NW_001811108.1 | + | 1208634 | 1208688 |
| Aae-1-3843 | NW_001811096.1 | + | 3595024 | 3595078 |
| Aae-1-3844 | NW_001811080.1 | - | 1126258 | 1126204 |
| Aae-1-3845 | NW_001810991.1 | + | 575910  | 575964  |
| Aae-1-3846 | NW_001811320.1 | - | 775081  | 775027  |
| Aae-1-3847 | NW_001811729.1 | + | 295542  | 295596  |
| Aae-1-3848 | NW_001810967.1 | - | 715145  | 715091  |
| Aae-1-3849 | NW_001810880.1 | + | 283687  | 283741  |
| Aae-1-3850 | NW_001810783.1 | + | 1243958 | 1244012 |
| Aae-1-3851 | NW_001811193.1 | - | 601742  | 601688  |
| Aae-1-3852 | NW_001811318.1 | + | 468277  | 468331  |
| Aae-1-3853 | NW_001811007.1 | - | 2803667 | 2803613 |
| Aae-1-3854 | NW_001811136.1 | - | 982180  | 982126  |
| Aae-1-3855 | NW_001810964.1 | - | 1473956 | 1473902 |
| Aae-1-3856 | NW_001810958.1 | - | 590372  | 590318  |
| Aae-1-3857 | NW_001810901.1 | - | 1081072 | 1081018 |
| Aae-1-3858 | NW_001811618.1 | + | 1945427 | 1945481 |
| Aae-1-3859 | NW_001809912.1 | + | 1477042 | 1477096 |
| Aae-1-3860 | NW_001811051.1 | + | 921366  | 921420  |
| Aae-1-3861 | NW_001811491.1 | + | 248767  | 248821  |
| Aae-1-3862 | NW_001810381.1 | + | 1862371 | 1862425 |
| Aae-1-3863 | NW_001811030.1 | + | 2077966 | 2078020 |
| Aae-1-3864 | NW_001811081.1 | - | 884109  | 884055  |
| Aae-1-3865 | NW_001810023.1 | - | 415738  | 415684  |
| Aae-1-3866 | NW_001809912.1 | - | 2221573 | 2221519 |
| Aae-1-3867 | NW_001811407.1 | - | 1196199 | 1196145 |
| Aae-1-3868 | NW_001809935.1 | + | 635739  | 635793  |
| Aae-1-3869 | NW_001809957.1 | + | 1844623 | 1844677 |
| Aae-1-3870 | NW_001810756.1 | - | 1506817 | 1506763 |
| Aae-1-3871 | NW_001810134.1 | + | 472424  | 472478  |
| Aae-1-3872 | NW_001810000.1 | - | 417000  | 416946  |
| Aae-1-3873 | NW_001810339.1 | - | 1665183 | 1665129 |
| Aae-1-3874 | NW_001810417.1 | - | 9799    | 9745    |
| Aae-1-3875 | NW_001811056.1 | + | 759259  | 759313  |
| Aae-1-3876 | NW_001811233.1 | - | 4991    | 4937    |
| Aae-1-3877 | NW_001811462.1 | - | 4498132 | 4498078 |
| Aae-1-3878 | NW_001810134.1 | + | 1760240 | 1760294 |
| Aae-1-3879 | NW_001810769.1 | - | 1521292 | 1521238 |
| Aae-1-3880 | NW_001811597.1 | + | 161187  | 161241  |
| Aae-1-3881 | NW_001810714.1 | - | 3127151 | 3127097 |

|            |                |   |         |         |
|------------|----------------|---|---------|---------|
| Aae-1-3882 | NW_001811060.1 | + | 155540  | 155594  |
| Aae-1-3883 | NW_001810490.1 | + | 282237  | 282291  |
| Aae-1-3884 | NW_001811170.1 | + | 949966  | 950020  |
| Aae-1-3885 | NW_001811351.1 | + | 106080  | 106134  |
| Aae-1-3886 | NW_001810067.1 | + | 2180912 | 2180966 |
| Aae-1-3887 | NW_001811126.1 | + | 37061   | 37115   |
| Aae-1-3888 | NW_001811267.1 | - | 286716  | 286662  |
| Aae-1-3889 | NW_001811568.1 | - | 147904  | 147850  |
| Aae-1-3890 | NW_001811064.1 | - | 743879  | 743825  |
| Aae-1-3891 | NW_001810371.1 | - | 892334  | 892280  |
| Aae-1-3892 | NW_001810022.1 | + | 913015  | 913069  |
| Aae-1-3893 | NW_001810018.1 | + | 13890   | 13944   |
| Aae-1-3894 | NW_001809903.1 | - | 37585   | 37531   |
| Aae-1-3895 | NW_001810503.1 | - | 21630   | 21576   |
| Aae-1-3896 | NW_001810607.1 | - | 710961  | 710907  |
| Aae-1-3897 | NW_001811621.1 | - | 68133   | 68079   |
| Aae-1-3898 | NW_001809854.1 | - | 33897   | 33843   |
| Aae-1-3899 | NW_001811626.1 | + | 81447   | 81501   |
| Aae-1-3900 | NW_001811591.1 | - | 98760   | 98703   |
| Aae-1-3901 | NW_001811540.1 | + | 752149  | 752203  |
| Aae-1-3902 | NW_001811438.1 | - | 173254  | 173200  |
| Aae-1-3903 | NW_001811201.1 | - | 724533  | 724479  |
| Aae-1-3904 | NW_001811166.1 | - | 855665  | 855611  |
| Aae-1-3905 | NW_001811063.1 | - | 108961  | 108911  |
| Aae-1-3906 | NW_001810023.1 | + | 465495  | 465549  |
| Aae-1-3907 | NW_001809801.1 | - | 3612625 | 3612571 |
| Aae-1-3908 | NW_001809821.1 | + | 33362   | 33416   |
| Aae-1-3909 | NW_001809822.1 | + | 236175  | 236229  |
| Aae-1-3910 | NW_001809825.1 | + | 1559492 | 1559546 |
| Aae-1-3911 | NW_001809825.1 | + | 2404025 | 2404079 |
| Aae-1-3912 | NW_001809863.1 | + | 253574  | 253628  |
| Aae-1-3913 | NW_001809868.1 | - | 1184907 | 1184853 |
| Aae-1-3914 | NW_001809878.1 | + | 257179  | 257233  |
| Aae-1-3915 | NW_001809879.1 | - | 1208376 | 1208322 |
| Aae-1-3916 | NW_001809890.1 | + | 214984  | 215038  |
| Aae-1-3917 | NW_001809912.1 | + | 2410051 | 2410105 |
| Aae-1-3918 | NW_001809912.1 | - | 2407647 | 2407593 |
| Aae-1-3919 | NW_001809912.1 | - | 1717610 | 1717556 |
| Aae-1-3920 | NW_001809928.1 | + | 190134  | 190188  |
| Aae-1-3921 | NW_001809931.1 | - | 68320   | 68266   |
| Aae-1-3922 | NW_001809935.1 | + | 2516906 | 2516960 |
| Aae-1-3923 | NW_001809946.1 | + | 259565  | 259619  |
| Aae-1-3924 | NW_001809947.1 | + | 219882  | 219936  |
| Aae-1-3925 | NW_001809947.1 | - | 4713    | 4659    |
| Aae-1-3926 | NW_001809957.1 | + | 762796  | 762850  |
| Aae-1-3927 | NW_001809957.1 | - | 2018075 | 2018021 |
| Aae-1-3928 | NW_001809981.1 | - | 125447  | 125393  |
| Aae-1-3929 | NW_001809988.1 | - | 184803  | 184749  |
| Aae-1-3930 | NW_001810022.1 | - | 4158558 | 4158504 |
| Aae-1-3931 | NW_001810056.1 | - | 1949917 | 1949863 |
| Aae-1-3932 | NW_001810099.1 | + | 32060   | 32114   |
| Aae-1-3933 | NW_001810100.1 | + | 1616838 | 1616892 |

|            |                |   |         |         |
|------------|----------------|---|---------|---------|
| Aae-1-3934 | NW_001810128.1 | + | 37425   | 37479   |
| Aae-1-3935 | NW_001810128.1 | - | 36873   | 36819   |
| Aae-1-3936 | NW_001810134.1 | + | 261112  | 261166  |
| Aae-1-3937 | NW_001810221.1 | + | 2163903 | 2163957 |
| Aae-1-3938 | NW_001810231.1 | - | 1431022 | 1430968 |
| Aae-1-3939 | NW_001810275.1 | + | 1627111 | 1627165 |
| Aae-1-3940 | NW_001810275.1 | - | 1624552 | 1624498 |
| Aae-1-3941 | NW_001810296.1 | - | 1868495 | 1868441 |
| Aae-1-3942 | NW_001810296.1 | - | 593514  | 593460  |
| Aae-1-3943 | NW_001810392.1 | - | 1180016 | 1179962 |
| Aae-1-3944 | NW_001810414.1 | + | 304278  | 304332  |
| Aae-1-3945 | NW_001810430.1 | + | 32579   | 32633   |
| Aae-1-3946 | NW_001810436.1 | + | 1661525 | 1661579 |
| Aae-1-3947 | NW_001810436.1 | - | 1660106 | 1660052 |
| Aae-1-3948 | NW_001810447.1 | + | 389206  | 389260  |
| Aae-1-3949 | NW_001810469.1 | - | 2055892 | 2055838 |
| Aae-1-3950 | NW_001810475.1 | - | 57327   | 57273   |
| Aae-1-3951 | NW_001810499.1 | + | 225888  | 225942  |
| Aae-1-3952 | NW_001810519.1 | - | 570914  | 570860  |
| Aae-1-3953 | NW_001810527.1 | + | 471565  | 471619  |
| Aae-1-3954 | NW_001810565.1 | + | 1677938 | 1677992 |
| Aae-1-3955 | NW_001810565.1 | + | 1985375 | 1985429 |
| Aae-1-3956 | NW_001810592.1 | + | 1208799 | 1208853 |
| Aae-1-3957 | NW_001810592.1 | - | 1203111 | 1203057 |
| Aae-1-3958 | NW_001810607.1 | - | 733647  | 733593  |
| Aae-1-3959 | NW_001810607.1 | - | 698657  | 698603  |
| Aae-1-3960 | NW_001810651.1 | + | 15015   | 15069   |
| Aae-1-3961 | NW_001810688.1 | - | 1734466 | 1734412 |
| Aae-1-3962 | NW_001810714.1 | - | 212431  | 212377  |
| Aae-1-3963 | NW_001810714.1 | - | 54509   | 54455   |
| Aae-1-3964 | NW_001810728.1 | + | 433025  | 433079  |
| Aae-1-3965 | NW_001810736.1 | - | 697116  | 697062  |
| Aae-1-3966 | NW_001810744.1 | - | 1222067 | 1222013 |
| Aae-1-3967 | NW_001810763.1 | + | 304011  | 304065  |
| Aae-1-3968 | NW_001810778.1 | - | 34988   | 34934   |
| Aae-1-3969 | NW_001810778.1 | - | 30822   | 30768   |
| Aae-1-3970 | NW_001810791.1 | - | 1556895 | 1556841 |
| Aae-1-3971 | NW_001810795.1 | + | 812999  | 813053  |
| Aae-1-3972 | NW_001810800.1 | - | 1320459 | 1320405 |
| Aae-1-3973 | NW_001810837.1 | + | 3873128 | 3873182 |
| Aae-1-3974 | NW_001810837.1 | + | 3915539 | 3915593 |
| Aae-1-3975 | NW_001810838.1 | + | 833022  | 833076  |
| Aae-1-3976 | NW_001810844.1 | + | 179539  | 179593  |
| Aae-1-3977 | NW_001810852.1 | + | 1049084 | 1049138 |
| Aae-1-3978 | NW_001810855.1 | + | 972488  | 972542  |
| Aae-1-3979 | NW_001810868.1 | - | 275150  | 275096  |
| Aae-1-3980 | NW_001810880.1 | + | 398744  | 398798  |
| Aae-1-3981 | NW_001810880.1 | + | 400899  | 400953  |
| Aae-1-3982 | NW_001810880.1 | - | 2025763 | 2025709 |
| Aae-1-3983 | NW_001810893.1 | - | 1238299 | 1238245 |
| Aae-1-3984 | NW_001810909.1 | + | 1724250 | 1724304 |
| Aae-1-3985 | NW_001810912.1 | - | 2018331 | 2018277 |

|            |                |   |         |         |
|------------|----------------|---|---------|---------|
| Aae-1-3986 | NW_001810912.1 | - | 1886438 | 1886384 |
| Aae-1-3987 | NW_001810923.1 | - | 495968  | 495914  |
| Aae-1-3988 | NW_001810939.1 | + | 1473998 | 1474052 |
| Aae-1-3989 | NW_001810939.1 | - | 1386986 | 1386932 |
| Aae-1-3990 | NW_001810945.1 | + | 131831  | 131885  |
| Aae-1-3991 | NW_001810945.1 | - | 573893  | 573839  |
| Aae-1-3992 | NW_001810950.1 | + | 537075  | 537129  |
| Aae-1-3993 | NW_001810952.1 | - | 487572  | 487518  |
| Aae-1-3994 | NW_001810955.1 | + | 2552822 | 2552876 |
| Aae-1-3995 | NW_001810959.1 | + | 832443  | 832497  |
| Aae-1-3996 | NW_001810960.1 | + | 717026  | 717080  |
| Aae-1-3997 | NW_001810962.1 | + | 1282955 | 1283009 |
| Aae-1-3998 | NW_001810964.1 | - | 942367  | 942313  |
| Aae-1-3999 | NW_001810970.1 | + | 2681054 | 2681108 |
| Aae-1-4000 | NW_001810970.1 | - | 2183712 | 2183658 |
| Aae-1-4001 | NW_001810975.1 | - | 190628  | 190574  |
| Aae-1-4002 | NW_001810984.1 | - | 441077  | 441023  |
| Aae-1-4003 | NW_001810993.1 | + | 1499537 | 1499591 |
| Aae-1-4004 | NW_001810994.1 | - | 1280086 | 1280032 |
| Aae-1-4005 | NW_001810995.1 | - | 426457  | 426403  |
| Aae-1-4006 | NW_001810998.1 | - | 1379695 | 1379641 |
| Aae-1-4007 | NW_001811006.1 | + | 1297330 | 1297384 |
| Aae-1-4008 | NW_001811007.1 | - | 3221806 | 3221752 |
| Aae-1-4009 | NW_001811009.1 | + | 128449  | 128503  |
| Aae-1-4010 | NW_001811019.1 | - | 1032606 | 1032552 |
| Aae-1-4011 | NW_001811020.1 | - | 119306  | 119252  |
| Aae-1-4012 | NW_001811027.1 | + | 44102   | 44156   |
| Aae-1-4013 | NW_001811027.1 | - | 513782  | 513728  |
| Aae-1-4014 | NW_001811030.1 | - | 3047603 | 3047549 |
| Aae-1-4015 | NW_001811031.1 | - | 138178  | 138124  |
| Aae-1-4016 | NW_001811034.1 | - | 151691  | 151637  |
| Aae-1-4017 | NW_001811038.1 | + | 1403739 | 1403793 |
| Aae-1-4018 | NW_001811038.1 | - | 1400815 | 1400761 |
| Aae-1-4019 | NW_001811041.1 | + | 1708722 | 1708776 |
| Aae-1-4020 | NW_001811041.1 | + | 3382459 | 3382513 |
| Aae-1-4021 | NW_001811046.1 | + | 378663  | 378717  |
| Aae-1-4022 | NW_001811053.1 | + | 745273  | 745327  |
| Aae-1-4023 | NW_001811054.1 | + | 997759  | 997813  |
| Aae-1-4024 | NW_001811054.1 | - | 986482  | 986428  |
| Aae-1-4025 | NW_001811058.1 | + | 705760  | 705814  |
| Aae-1-4026 | NW_001811059.1 | + | 105804  | 105858  |
| Aae-1-4027 | NW_001811059.1 | + | 882394  | 882448  |
| Aae-1-4028 | NW_001811059.1 | - | 881598  | 881544  |
| Aae-1-4029 | NW_001811060.1 | - | 642712  | 642658  |
| Aae-1-4030 | NW_001811061.1 | - | 65909   | 65855   |
| Aae-1-4031 | NW_001811062.1 | - | 673916  | 673862  |
| Aae-1-4032 | NW_001811063.1 | - | 513581  | 513527  |
| Aae-1-4033 | NW_001811064.1 | + | 1176265 | 1176319 |
| Aae-1-4034 | NW_001811064.1 | - | 1175335 | 1175281 |
| Aae-1-4035 | NW_001811071.1 | + | 219233  | 219287  |
| Aae-1-4036 | NW_001811071.1 | - | 891057  | 891003  |
| Aae-1-4037 | NW_001811079.1 | + | 108556  | 108610  |

|            |                |   |         |         |
|------------|----------------|---|---------|---------|
| Aae-1-4038 | NW_001811081.1 | + | 617844  | 617898  |
| Aae-1-4039 | NW_001811082.1 | - | 1141966 | 1141912 |
| Aae-1-4040 | NW_001811085.1 | + | 499020  | 499074  |
| Aae-1-4041 | NW_001811088.1 | + | 372580  | 372634  |
| Aae-1-4042 | NW_001811090.1 | - | 102621  | 102567  |
| Aae-1-4043 | NW_001811092.1 | + | 326188  | 326242  |
| Aae-1-4044 | NW_001811095.1 | + | 146195  | 146249  |
| Aae-1-4045 | NW_001811098.1 | + | 694024  | 694078  |
| Aae-1-4046 | NW_001811100.1 | + | 912433  | 912487  |
| Aae-1-4047 | NW_001811107.1 | + | 2872095 | 2872149 |
| Aae-1-4048 | NW_001811107.1 | - | 592795  | 592741  |
| Aae-1-4049 | NW_001811108.1 | + | 128300  | 128354  |
| Aae-1-4050 | NW_001811111.1 | - | 90512   | 90458   |
| Aae-1-4051 | NW_001811112.1 | + | 688166  | 688220  |
| Aae-1-4052 | NW_001811118.1 | - | 3327876 | 3327822 |
| Aae-1-4053 | NW_001811125.1 | + | 443689  | 443743  |
| Aae-1-4054 | NW_001811127.1 | + | 708886  | 708940  |
| Aae-1-4055 | NW_001811129.1 | + | 4039687 | 4039741 |
| Aae-1-4056 | NW_001811133.1 | + | 795120  | 795174  |
| Aae-1-4057 | NW_001811135.1 | + | 594850  | 594904  |
| Aae-1-4058 | NW_001811135.1 | + | 942809  | 942863  |
| Aae-1-4059 | NW_001811141.1 | + | 2898714 | 2898768 |
| Aae-1-4060 | NW_001811141.1 | - | 2895351 | 2895297 |
| Aae-1-4061 | NW_001811142.1 | + | 1179452 | 1179506 |
| Aae-1-4062 | NW_001811142.1 | - | 1175105 | 1175051 |
| Aae-1-4063 | NW_001811143.1 | - | 284636  | 284582  |
| Aae-1-4064 | NW_001811150.1 | + | 352893  | 352947  |
| Aae-1-4065 | NW_001811152.1 | - | 3065194 | 3065140 |
| Aae-1-4066 | NW_001811159.1 | + | 622858  | 622912  |
| Aae-1-4067 | NW_001811163.1 | + | 3043066 | 3043120 |
| Aae-1-4068 | NW_001811174.1 | - | 675780  | 675726  |
| Aae-1-4069 | NW_001811179.1 | + | 576782  | 576836  |
| Aae-1-4070 | NW_001811179.1 | + | 982417  | 982471  |
| Aae-1-4071 | NW_001811179.1 | - | 980562  | 980508  |
| Aae-1-4072 | NW_001811180.1 | - | 338885  | 338831  |
| Aae-1-4073 | NW_001811183.1 | + | 527705  | 527759  |
| Aae-1-4074 | NW_001811185.1 | - | 2418281 | 2418227 |
| Aae-1-4075 | NW_001811191.1 | + | 115897  | 115951  |
| Aae-1-4076 | NW_001811191.1 | - | 722470  | 722416  |
| Aae-1-4077 | NW_001811194.1 | + | 273755  | 273809  |
| Aae-1-4078 | NW_001811195.1 | + | 191523  | 191577  |
| Aae-1-4079 | NW_001811195.1 | - | 888142  | 888088  |
| Aae-1-4080 | NW_001811195.1 | - | 207603  | 207549  |
| Aae-1-4081 | NW_001811197.1 | - | 940132  | 940078  |
| Aae-1-4082 | NW_001811200.1 | + | 716018  | 716072  |
| Aae-1-4083 | NW_001811207.1 | + | 610066  | 610120  |
| Aae-1-4084 | NW_001811207.1 | - | 608689  | 608635  |
| Aae-1-4085 | NW_001811212.1 | + | 858581  | 858635  |
| Aae-1-4086 | NW_001811229.1 | + | 2471561 | 2471615 |
| Aae-1-4087 | NW_001811229.1 | - | 2466924 | 2466870 |
| Aae-1-4088 | NW_001811252.1 | + | 973208  | 973262  |
| Aae-1-4089 | NW_001811271.1 | + | 73116   | 73170   |



|            |                |   |         |         |
|------------|----------------|---|---------|---------|
| Aae-1-4090 | NW_001811271.1 | - | 458147  | 458093  |
| Aae-1-4091 | NW_001811273.1 | + | 107013  | 107067  |
| Aae-1-4092 | NW_001811274.1 | + | 3078214 | 3078268 |
| Aae-1-4093 | NW_001811288.1 | - | 91765   | 91711   |
| Aae-1-4094 | NW_001811296.1 | + | 142976  | 143030  |
| Aae-1-4095 | NW_001811296.1 | - | 2899250 | 2899196 |
| Aae-1-4096 | NW_001811296.1 | - | 2667469 | 2667415 |
| Aae-1-4097 | NW_001811301.1 | + | 169134  | 169188  |
| Aae-1-4098 | NW_001811301.1 | - | 167519  | 167465  |
| Aae-1-4099 | NW_001811318.1 | + | 2296121 | 2296175 |
| Aae-1-4100 | NW_001811321.1 | + | 558001  | 558055  |
| Aae-1-4101 | NW_001811321.1 | - | 554413  | 554359  |
| Aae-1-4102 | NW_001811329.1 | + | 393160  | 393214  |
| Aae-1-4103 | NW_001811329.1 | + | 1463559 | 1463613 |
| Aae-1-4104 | NW_001811329.1 | - | 1462583 | 1462529 |
| Aae-1-4105 | NW_001811340.1 | + | 2827475 | 2827529 |
| Aae-1-4106 | NW_001811341.1 | - | 242077  | 242023  |
| Aae-1-4107 | NW_001811346.1 | - | 82681   | 82627   |
| Aae-1-4108 | NW_001811347.1 | - | 366449  | 366395  |
| Aae-1-4109 | NW_001811350.1 | + | 332755  | 332809  |
| Aae-1-4110 | NW_001811350.1 | + | 335798  | 335852  |
| Aae-1-4111 | NW_001811352.1 | - | 2181350 | 2181296 |
| Aae-1-4112 | NW_001811362.1 | + | 194874  | 194928  |
| Aae-1-4113 | NW_001811363.1 | - | 2777405 | 2777351 |
| Aae-1-4114 | NW_001811374.1 | + | 722111  | 722165  |
| Aae-1-4115 | NW_001811376.1 | - | 108403  | 108349  |
| Aae-1-4116 | NW_001811392.1 | + | 463802  | 463856  |
| Aae-1-4117 | NW_001811398.1 | + | 585100  | 585154  |
| Aae-1-4118 | NW_001811411.1 | + | 544875  | 544929  |
| Aae-1-4119 | NW_001811422.1 | - | 34820   | 34766   |
| Aae-1-4120 | NW_001811431.1 | + | 404451  | 404505  |
| Aae-1-4121 | NW_001811432.1 | - | 381184  | 381130  |
| Aae-1-4122 | NW_001811437.1 | + | 368357  | 368411  |
| Aae-1-4123 | NW_001811440.1 | + | 2763604 | 2763658 |
| Aae-1-4124 | NW_001811440.1 | - | 2433993 | 2433939 |
| Aae-1-4125 | NW_001811441.1 | - | 389360  | 389306  |
| Aae-1-4126 | NW_001811449.1 | + | 375250  | 375304  |
| Aae-1-4127 | NW_001811451.1 | + | 1789634 | 1789688 |
| Aae-1-4128 | NW_001811455.1 | - | 98184   | 98130   |
| Aae-1-4129 | NW_001811462.1 | + | 281737  | 281791  |
| Aae-1-4130 | NW_001811462.1 | + | 997123  | 997177  |
| Aae-1-4131 | NW_001811462.1 | - | 994360  | 994306  |
| Aae-1-4132 | NW_001811474.1 | - | 2571752 | 2571698 |
| Aae-1-4133 | NW_001811476.1 | + | 266189  | 266243  |
| Aae-1-4134 | NW_001811481.1 | - | 267111  | 267057  |
| Aae-1-4135 | NW_001811496.1 | + | 866359  | 866413  |
| Aae-1-4136 | NW_001811496.1 | - | 863161  | 863107  |
| Aae-1-4137 | NW_001811507.1 | + | 2126054 | 2126108 |
| Aae-1-4138 | NW_001811511.1 | - | 67859   | 67805   |
| Aae-1-4139 | NW_001811514.1 | - | 317927  | 317873  |
| Aae-1-4140 | NW_001811522.1 | + | 265200  | 265254  |
| Aae-1-4141 | NW_001811527.1 | + | 341245  | 341299  |

|            |                |   |         |         |
|------------|----------------|---|---------|---------|
| Aae-1-4142 | NW_001811529.1 | + | 215575  | 215629  |
| Aae-1-4143 | NW_001811529.1 | + | 2387795 | 2387849 |
| Aae-1-4144 | NW_001811529.1 | - | 2387163 | 2387109 |
| Aae-1-4145 | NW_001811529.1 | - | 2384900 | 2384846 |
| Aae-1-4146 | NW_001811533.1 | - | 444672  | 444618  |
| Aae-1-4147 | NW_001811540.1 | + | 4521    | 4575    |
| Aae-1-4148 | NW_001811568.1 | + | 241392  | 241446  |
| Aae-1-4149 | NW_001811574.1 | + | 452528  | 452582  |
| Aae-1-4150 | NW_001811578.1 | + | 370371  | 370425  |
| Aae-1-4151 | NW_001811579.1 | + | 300923  | 300977  |
| Aae-1-4152 | NW_001811580.1 | - | 384698  | 384644  |
| Aae-1-4153 | NW_001811586.1 | + | 129503  | 129557  |
| Aae-1-4154 | NW_001811587.1 | + | 167994  | 168048  |
| Aae-1-4155 | NW_001811594.1 | + | 192863  | 192917  |
| Aae-1-4156 | NW_001811596.1 | + | 1695502 | 1695556 |
| Aae-1-4157 | NW_001811598.1 | + | 321251  | 321305  |
| Aae-1-4158 | NW_001811607.1 | - | 2283908 | 2283854 |
| Aae-1-4159 | NW_001811623.1 | - | 173871  | 173817  |
| Aae-1-4160 | NW_001811629.1 | + | 1691059 | 1691113 |
| Aae-1-4161 | NW_001811661.1 | + | 360480  | 360534  |
| Aae-1-4162 | NW_001811678.1 | + | 168995  | 169049  |
| Aae-1-4163 | NW_001811678.1 | - | 166495  | 166441  |
| Aae-1-4164 | NW_001811713.1 | - | 351481  | 351427  |
| Aae-1-4165 | NW_001811716.1 | - | 35997   | 35943   |
| Aae-1-4166 | NW_001811721.1 | + | 304043  | 304097  |
| Aae-1-4167 | NW_001811731.1 | - | 202606  | 202552  |
| Aae-1-4168 | NW_001811739.1 | + | 2345120 | 2345174 |
| Aae-1-4169 | NW_001811750.1 | - | 1561019 | 1560965 |
| Aae-1-4170 | NW_001811757.1 | + | 105741  | 105795  |
| Aae-1-4171 | NW_001811761.1 | + | 2495496 | 2495550 |
| Aae-1-4172 | NW_001811769.1 | - | 128648  | 128594  |
| Aae-1-4173 | NW_001811783.1 | + | 1753163 | 1753217 |
| Aae-1-4174 | NW_001811789.1 | - | 43450   | 43396   |
| Aae-1-4175 | NW_001811790.1 | + | 4390    | 4444    |
| Aae-1-4176 | NW_001811790.1 | + | 60699   | 60753   |
| Aae-1-4177 | NW_001835775.1 | - | 188     | 134     |
| Aae-1-4178 | NW_001836839.1 | + | 2425    | 2479    |
| Aae-1-4179 | NW_001836839.1 | + | 7634    | 7688    |
| Aae-1-4180 | NW_001837425.1 | - | 18457   | 18403   |
| Aae-1-4181 | NW_001837430.1 | + | 22850   | 22904   |
| Aae-1-4182 | NW_001811163.1 | - | 49899   | 49846   |
| Aae-1-4183 | NW_001811007.1 | + | 2804724 | 2804780 |
| Aae-1-4184 | NW_001810990.1 | + | 1034793 | 1034847 |
| Aae-1-4185 | NW_001810984.1 | - | 1489446 | 1489392 |
| Aae-1-4186 | NW_001810964.1 | - | 1166126 | 1166072 |
| Aae-1-4187 | NW_001811061.1 | + | 226346  | 226400  |
| Aae-1-4188 | NW_001810944.1 | - | 395997  | 395943  |
| Aae-1-4189 | NW_001810813.1 | - | 1144360 | 1144306 |
| Aae-1-4190 | NW_001810714.1 | + | 3065708 | 3065762 |
| Aae-1-4191 | NW_001811462.1 | + | 1415941 | 1415995 |
| Aae-1-4192 | NW_001810499.1 | + | 1034931 | 1034985 |
| Aae-1-4193 | NW_001810999.1 | - | 549627  | 549573  |

|            |                |   |         |         |
|------------|----------------|---|---------|---------|
| Aae-1-4194 | NW_001811580.1 | - | 551114  | 551060  |
| Aae-1-4195 | NW_001810351.1 | + | 1563491 | 1563545 |
| Aae-1-4196 | NW_001811200.1 | - | 721946  | 721892  |
| Aae-1-4197 | NW_001811296.1 | - | 239808  | 239754  |
| Aae-1-4198 | NW_001810351.1 | + | 1174078 | 1174132 |
| Aae-1-4199 | NW_001811355.1 | + | 346020  | 346074  |
| Aae-1-4200 | NW_001810034.1 | + | 124028  | 124082  |
| Aae-1-4201 | NW_001811351.1 | + | 878171  | 878225  |
| Aae-1-4202 | NW_001810022.1 | - | 4507577 | 4507523 |
| Aae-1-4203 | NW_001810454.1 | + | 29938   | 29992   |
| Aae-1-4204 | NW_001811062.1 | + | 1094146 | 1094200 |
| Aae-1-4205 | NW_001811406.1 | + | 536351  | 536405  |
| Aae-1-4206 | NW_001809952.1 | - | 211050  | 210996  |
| Aae-1-4207 | NW_001810728.1 | + | 1680133 | 1680187 |
| Aae-1-4208 | NW_001809933.1 | + | 44158   | 44212   |
| Aae-1-4209 | NW_001809881.1 | - | 117036  | 116982  |
| Aae-1-4210 | NW_001809825.1 | + | 1060787 | 1060842 |
| Aae-1-4211 | NW_001809814.1 | + | 1633501 | 1633552 |
| Aae-1-4212 | NW_001811507.1 | + | 331394  | 331440  |
| Aae-1-4213 | NW_001810242.1 | + | 1340905 | 1340959 |
| Aae-1-4214 | NW_001810243.1 | - | 1934699 | 1934645 |
| Aae-1-4215 | NW_001810527.1 | - | 541057  | 541003  |
| Aae-1-4216 | NW_001811019.1 | + | 2453342 | 2453396 |
| Aae-1-4217 | NW_001811429.1 | - | 1105840 | 1105785 |
| Aae-1-4218 | NW_001811514.1 | + | 182796  | 182850  |
| Aae-1-4219 | NW_001811576.1 | + | 268523  | 268577  |
| Aae-1-4220 | NW_001835677.1 | - | 5185    | 5131    |
| Aae-1-4221 | NW_001811432.1 | - | 287040  | 286986  |
| Aae-1-4222 | NW_001811352.1 | + | 2652642 | 2652696 |
| Aae-1-4223 | NW_001811478.1 | - | 393516  | 393462  |
| Aae-1-4224 | NW_001811274.1 | + | 2442197 | 2442251 |
| Aae-1-4225 | NW_001811167.1 | - | 659555  | 659501  |
| Aae-1-4226 | NW_001811144.1 | - | 1046663 | 1046609 |
| Aae-1-4227 | NW_001810156.1 | - | 1384901 | 1384847 |
| Aae-1-4228 | NW_001810800.1 | - | 1472283 | 1472229 |
| Aae-1-4229 | NW_001810100.1 | - | 668059  | 668005  |
| Aae-1-4230 | NW_001809957.1 | - | 518287  | 518233  |
| Aae-1-4231 | NW_001809935.1 | + | 577595  | 577649  |
| Aae-1-4232 | NW_001810078.1 | + | 142523  | 142577  |
| Aae-1-4233 | NW_001810156.1 | - | 1172430 | 1172376 |
| Aae-1-4234 | NW_001811179.1 | + | 672585  | 672639  |
| Aae-1-4235 | NW_001811478.1 | + | 9742    | 9796    |
| Aae-1-4236 | NW_001811098.1 | - | 820650  | 820596  |
| Aae-1-4237 | NW_001811250.1 | - | 674888  | 674834  |
| Aae-1-4238 | NW_001811190.1 | + | 425422  | 425476  |
| Aae-1-4239 | NW_001810991.1 | - | 913326  | 913272  |
| Aae-1-4240 | NW_001809968.1 | - | 2385538 | 2385484 |
| Aae-1-4241 | NW_001809900.1 | - | 83882   | 83828   |
| Aae-1-4242 | NW_001809979.1 | - | 718008  | 717954  |
| Aae-1-4243 | NW_001810383.1 | + | 33706   | 33760   |
| Aae-1-4244 | NW_001811437.1 | - | 362457  | 362403  |
| Aae-1-4245 | NW_001810981.1 | + | 881141  | 881195  |

|            |                |   |         |         |
|------------|----------------|---|---------|---------|
| Aae-1-4246 | NW_001810637.1 | + | 1481981 | 1482035 |
| Aae-1-4247 | NW_001809912.1 | + | 2336756 | 2336811 |
| Aae-1-4248 | NW_001811276.1 | + | 704538  | 704592  |
| Aae-1-4249 | NW_001811757.1 | + | 105680  | 105735  |
| Aae-1-4250 | NW_001810078.1 | + | 56340   | 56394   |
| Aae-1-4251 | NW_001810307.1 | - | 1671879 | 1671825 |
| Aae-1-4252 | NW_001810459.1 | + | 267852  | 267906  |
| Aae-1-4253 | NW_001811076.1 | - | 454447  | 454393  |
| Aae-1-4254 | NW_001810286.1 | + | 474095  | 474149  |
| Aae-1-4255 | NW_001811375.1 | + | 561004  | 561058  |
| Aae-1-4256 | NW_001811381.1 | - | 92461   | 92407   |
| Aae-1-4257 | NW_001809801.1 | - | 5101959 | 5101905 |
| Aae-1-4258 | NW_001810162.1 | - | 18469   | 18415   |
| Aae-1-4259 | NW_001809801.1 | - | 2559844 | 2559790 |
| Aae-1-4260 | NW_001809968.1 | - | 1968185 | 1968137 |
| Aae-1-4261 | NW_001811396.1 | - | 1002447 | 1002393 |
| Aae-1-4262 | NW_001811028.1 | + | 1164728 | 1164782 |
| Aae-1-4263 | NW_001809802.1 | - | 3683151 | 3683097 |
| Aae-1-4264 | NW_001809803.1 | + | 1976327 | 1976381 |
| Aae-1-4265 | NW_001809814.1 | + | 2099681 | 2099735 |
| Aae-1-4266 | NW_001809957.1 | + | 1986447 | 1986501 |
| Aae-1-4267 | NW_001809979.1 | - | 515455  | 515401  |
| Aae-1-4268 | NW_001810072.1 | + | 57442   | 57496   |
| Aae-1-4269 | NW_001810072.1 | + | 124128  | 124182  |
| Aae-1-4270 | NW_001810111.1 | + | 699054  | 699108  |
| Aae-1-4271 | NW_001810155.1 | + | 64562   | 64616   |
| Aae-1-4272 | NW_001810254.1 | + | 16461   | 16515   |
| Aae-1-4273 | NW_001810392.1 | - | 433883  | 433829  |
| Aae-1-4274 | NW_001810414.1 | + | 111073  | 111127  |
| Aae-1-4275 | NW_001810425.1 | + | 575043  | 575097  |
| Aae-1-4276 | NW_001810436.1 | + | 700315  | 700369  |
| Aae-1-4277 | NW_001810508.1 | + | 674928  | 674982  |
| Aae-1-4278 | NW_001810638.1 | - | 1670904 | 1670850 |
| Aae-1-4279 | NW_001810721.1 | + | 956329  | 956383  |
| Aae-1-4280 | NW_001810783.1 | - | 325343  | 325289  |
| Aae-1-4281 | NW_001810852.1 | + | 204877  | 204931  |
| Aae-1-4282 | NW_001810966.1 | - | 1547763 | 1547709 |
| Aae-1-4283 | NW_001810972.1 | + | 1246081 | 1246135 |
| Aae-1-4284 | NW_001811044.1 | + | 55719   | 55773   |
| Aae-1-4285 | NW_001811062.1 | - | 966182  | 966128  |
| Aae-1-4286 | NW_001811069.1 | - | 325079  | 325025  |
| Aae-1-4287 | NW_001811073.1 | + | 744282  | 744336  |
| Aae-1-4288 | NW_001811086.1 | - | 593882  | 593828  |
| Aae-1-4289 | NW_001811096.1 | - | 2990842 | 2990788 |
| Aae-1-4290 | NW_001811096.1 | - | 1477831 | 1477777 |
| Aae-1-4291 | NW_001811096.1 | - | 542018  | 541964  |
| Aae-1-4292 | NW_001811097.1 | + | 1068931 | 1068985 |
| Aae-1-4293 | NW_001811140.1 | - | 888280  | 888226  |
| Aae-1-4294 | NW_001811150.1 | + | 732630  | 732684  |
| Aae-1-4295 | NW_001811163.1 | + | 2787522 | 2787576 |
| Aae-1-4296 | NW_001811168.1 | + | 408314  | 408368  |
| Aae-1-4297 | NW_001811241.1 | + | 654050  | 654104  |

|            |                |   |           |           |
|------------|----------------|---|-----------|-----------|
| Aae-1-4298 | NW_001811246.1 | + | 329484    | 329538    |
| Aae-1-4299 | NW_001811268.1 | + | 98455     | 98509     |
| Aae-1-4300 | NW_001811299.1 | + | 477610    | 477664    |
| Aae-1-4301 | NW_001811305.1 | + | 281164    | 281218    |
| Aae-1-4302 | NW_001811307.1 | - | 2898935   | 2898881   |
| Aae-1-4303 | NW_001811351.1 | + | 3685965   | 3686019   |
| Aae-1-4304 | NW_001811429.1 | - | 959478    | 959424    |
| Aae-1-4305 | NW_001811458.1 | + | 440415    | 440469    |
| Aae-1-4306 | NW_001811474.1 | - | 750822    | 750768    |
| Aae-1-4307 | NW_001811474.1 | - | 264105    | 264051    |
| Aae-1-4308 | NW_001811486.1 | - | 397373    | 397319    |
| Aae-1-4309 | NW_001811506.1 | - | 547715    | 547661    |
| Aae-1-4310 | NW_001811593.1 | + | 314648    | 314702    |
| Aae-1-4311 | NW_001811618.1 | - | 1679792   | 1679738   |
| Aae-1-4312 | NW_001811629.1 | - | 1683455   | 1683401   |
| Aae-1-4313 | NW_001811761.1 | + | 473551    | 473605    |
| Aae-1-4314 | NW_001811023.1 | - | 560897    | 560846    |
| Aae-1-4315 | NW_001811560.1 | - | 275330    | 275276    |
| Aae-1-4316 | NW_001811001.1 | - | 812585    | 812531    |
| Aae-1-4317 | NW_001811240.1 | + | 4463314   | 4463368   |
| Aae-1-4318 | NW_001811529.1 | - | 2874035   | 2873981   |
| Aae-1-4319 | NW_001810721.1 | - | 1829630   | 1829577   |
| Aae-1-4320 | NW_001811640.1 | - | 1948316   | 1948266   |
| Aae-1-4321 | NW_001837020.1 | + | 8501      | 8554      |
| Aae-1-4322 | NW_001810971.1 | - | 510450    | 510396    |
| Aae-1-4323 | NW_001811407.1 | - | 1302599   | 1302545   |
| Aae-1-4324 | NW_001811350.1 | + | 515964    | 516018    |
| Aae-1-4325 | NW_001811363.1 | + | 2952135   | 2952189   |
| Aae-1-4326 | NW_001811397.1 | + | 505675    | 505729    |
| Aae-1-4327 | NW_001811596.1 | + | 276873    | 276927    |
| Aae-1-4328 | NW_001811600.1 | - | 289868    | 289814    |
| Aae-1-4329 | NW_001811222.1 | + | 287812    | 287866    |
| Aae-1-4330 | NW_001811562.1 | - | 2750346   | 2750292   |
| Aae-1-4331 | NW_001811554.1 | + | 6078      | 6132      |
| Aae-1-4332 | NW_001811389.1 | + | 220202    | 220256    |
| Aae-1-4333 | NW_001811421.1 | - | 385309    | 385255    |
| Aae-1-4334 | NW_001811458.1 | - | 482227    | 482175    |
| Aae-1-4335 | NW_001811201.1 | - | 513661    | 513607    |
| Aae-1-4336 | NW_001810111.1 | - | 1673262   | 1673208   |
| Aae-1-4337 | NW_001810537.1 | - | 45570     | 45516     |
| Aae-1-4338 | NW_001811110.1 | + | 218305    | 218361    |
| Aae-1-4339 | NW_001811634.1 | - | 266318    | 266264    |
| Aae-1-4340 | NW_001810638.1 | + | 1501113   | 1501167   |
| Aae-1-4341 | NW_001809989.1 | + | 1708557   | 1708608   |
| Aae-1-4342 | NW_001811585.1 | + | 2817768   | 2817823   |
| Aae-1-4343 | NW_001811116.1 | - | 321143    | 321090    |
| Aae-1-4344 | NW_001810984.1 | - | 1209788   | 1209733   |
| Aae-1-4345 | NW_001810898.1 | - | 273778    | 273720    |
| Mmu-1-27   | NT_039353.7    | - | 81355619  | 81355532  |
| Mmu-1-28   | NW_001030811.1 | - | 70596485  | 70596398  |
| Mmu-1-29   | AC_000028.1    | - | 130800358 | 130800271 |
| Mmu-1-30   | NC_000072.5    | - | 129042657 | 129042570 |

|          |                |   |           |           |
|----------|----------------|---|-----------|-----------|
| Hsa-1-20 | NT_030059.13   | - | 66732480  | 66732397  |
| Hsa-1-21 | NW_924884.1    | - | 26660004  | 26659921  |
| Hsa-1-22 | NW_001838006.2 | + | 9076606   | 9076689   |
| Hsa-1-23 | NC_000010.10   | - | 115928016 | 115927933 |
| Hsa-1-24 | AC_000053.1    | - | 109657187 | 109657104 |
| Hsa-1-25 | AC_000142.1    | - | 109555078 | 109554995 |
| Ptr-1-11 | NW_001220742.1 | - | 11175449  | 11175366  |
| Ptr-1-12 | NC_006477.2    | - | 114862921 | 114862838 |
| Mmu-2-11 | NW_001125295.1 | - | 67249     | 67167     |
| Ssc-1-3  | NW_001885543.1 | - | 1780080   | 1779996   |
| Ssc-1-4  | NC_010456.1    | - | 121937569 | 121937485 |
| Eca-1-15 | NW_001867386.1 | + | 17650707  | 17650791  |
| Eca-1-16 | NC_009144.2    | + | 17650707  | 17650791  |
| Bta-1-3  | NW_001494374.2 | - | 1546405   | 1546321   |
| Bta-1-4  | NC_007327.3    | - | 35082886  | 35082802  |
| Clu-1-1  | NW_876285.1    | - | 25017142  | 25017058  |
| Clu-1-2  | NC_006610.2    | - | 28017142  | 28017058  |
| Mdo-1-23 | NW_001581859.1 | + | 47845879  | 47845964  |
| Mdo-1-24 | NC_008801.1    | + | 96595526  | 96595611  |
| Tgu-1-1  | NW_002198527.1 | + | 272297    | 272353    |
| Oan-1-2  | NW_001752350.1 | - | 533196    | 533145    |
| Mmu-1-31 | NT_109315.4    | + | 1757035   | 1757086   |
| Mmu-1-32 | NW_001030745.1 | + | 1112700   | 1112751   |
| Mmu-1-33 | AC_000026.1    | + | 43932398  | 43932449  |
| Mmu-1-34 | NC_000070.5    | + | 43917960  | 43918011  |
| Rno-1-21 | NW_047712.1    | + | 460589    | 460640    |
| Rno-1-22 | NW_001084836.1 | + | 32742106  | 32742157  |
| Rno-1-23 | AC_000073.1    | + | 56712834  | 56712885  |
| Rno-1-24 | NC_005104.2    | + | 60371361  | 60371412  |
| Eca-1-17 | NW_001867396.1 | + | 1321382   | 1321433   |
| Eca-1-18 | NC_009168.2    | + | 1321382   | 1321433   |
| Mmu-2-12 | NW_001101662.1 | - | 398175    | 398123    |
| Mmu-2-13 | NC_007872.1    | - | 41396244  | 41396192  |
| Ptr-1-13 | NW_001240439.1 | + | 36022474  | 36022526  |
| Ptr-1-14 | NC_006476.2    | + | 36817700  | 36817752  |
| Hsa-1-26 | NT_008413.18   | + | 36062692  | 36062744  |
| Hsa-1-27 | NW_924062.1    | + | 35890777  | 35890829  |
| Hsa-1-28 | NW_001839151.2 | - | 2712190   | 2712138   |
| Hsa-1-29 | NC_000009.11   | + | 36072692  | 36072744  |
| Hsa-1-30 | AC_000052.1    | + | 36006258  | 36006310  |
| Hsa-1-31 | AC_000141.1    | + | 36026909  | 36026961  |
| Clu-1-3  | NW_876253.1    | + | 43513672  | 43513724  |
| Clu-1-4  | NC_006593.2    | + | 55574374  | 55574426  |
| Bta-1-5  | NW_001495460.2 | + | 159066    | 159118    |
| Bta-1-6  | NC_007306.3    | + | 63111584  | 63111636  |
| Gga-1-1  | NW_001471637.1 | + | 2728482   | 2728534   |
| Gga-1-2  | NC_006089.2    | + | 57147256  | 57147308  |
| Tgu-1-2  | NW_002198271.1 | - | 8046200   | 8046148   |
| Tgu-1-3  | NC_011465.1    | - | 75586939  | 75586887  |
| Mdo-1-25 | NW_001581976.1 | + | 14018006  | 14018058  |
| Mdo-1-26 | NC_008806.1    | + | 26969510  | 26969562  |
| Gga-1-3  | NW_001471673.1 | - | 9425216   | 9425159   |

|          |                |   |           |           |
|----------|----------------|---|-----------|-----------|
| Gga-1-4  | NC_006090.2    | - | 107580148 | 107580091 |
| Oan-1-3  | NW_001794184.1 | - | 6561960   | 6561876   |
| Sma-1-17 | NW_003037895.1 | + | 61029     | 61106     |
| Sma-1-18 | NW_003037895.1 | + | 97405     | 97482     |
| Sma-1-19 | NS_000200.1    | + | 142507231 | 142507308 |
| Sma-1-20 | NS_000200.1    | + | 142543607 | 142543684 |
| Sma-1-21 | NW_003038037.1 | + | 1679770   | 1679826   |
| Sma-1-22 | NS_000200.1    | + | 251835179 | 251835235 |
| Sma-1-23 | NW_003037912.1 | + | 25666     | 25743     |
| Sma-1-24 | NS_000200.1    | + | 156837241 | 156837318 |
| Sma-1-25 | NW_003024567.1 | - | 788       | 722       |
| Sma-1-26 | NW_003037885.1 | + | 1057664   | 1057730   |
| Sma-1-27 | NS_000200.1    | + | 129155611 | 129155677 |
| Sma-1-28 | NS_000200.1    | - | 348866783 | 348866717 |
| Sma-1-29 | NW_003037847.1 | - | 737945    | 737897    |
| Sma-1-30 | NS_000200.1    | - | 89389675  | 89389627  |
| Sma-1-31 | NW_003037795.1 | + | 467984    | 468032    |
| Sma-1-32 | NS_000200.1    | + | 6858867   | 6858915   |
| Sma-1-33 | NW_003037938.1 | - | 429352    | 429297    |
| Sma-1-34 | NS_000200.1    | - | 182466465 | 182466410 |
| Sma-1-35 | NW_003038034.1 | - | 246149    | 246082    |
| Sma-1-36 | NS_000200.1    | - | 247187905 | 247187838 |
| Sma-1-37 | NW_003037915.1 | - | 210060    | 210011    |
| Sma-1-38 | NS_000200.1    | - | 162110046 | 162109997 |
| Sma-1-39 | NW_003037854.1 | - | 691787    | 691738    |
| Sma-1-40 | NS_000200.1    | - | 97596208  | 97596159  |
| Sma-1-41 | NW_003038251.1 | - | 515986    | 515937    |
| Sma-1-42 | NS_000200.1    | - | 318847758 | 318847709 |
| Sma-1-43 | NW_003037944.1 | + | 491847    | 491924    |
| Sma-1-44 | NS_000200.1    | + | 188713200 | 188713277 |
| Sma-1-45 | NW_003037810.1 | + | 1198076   | 1198125   |
| Sma-1-46 | NS_000200.1    | + | 37802598  | 37802647  |
| Sma-1-47 | NW_003037906.1 | + | 135008    | 135076    |
| Sma-1-48 | NS_000200.1    | + | 150442787 | 150442855 |
| Sma-1-49 | NW_003037874.1 | - | 273823    | 273774    |
| Sma-1-50 | NS_000200.1    | - | 119698773 | 119698724 |
| Sma-1-51 | NW_003037891.1 | + | 1233848   | 1233897   |
| Sma-1-52 | NS_000200.1    | + | 139115126 | 139115175 |
| Sma-1-53 | NW_003037809.1 | - | 1043888   | 1043840   |
| Sma-1-54 | NS_000200.1    | - | 34708352  | 34708304  |
| Sma-1-55 | NW_003037943.1 | - | 1178364   | 1178315   |
| Sma-1-56 | NS_000200.1    | - | 188199897 | 188199848 |
| Sma-1-57 | NW_003037822.1 | - | 81583     | 81534     |
| Sma-1-58 | NS_000200.1    | - | 54389589  | 54389540  |
| Sma-1-59 | NW_003037915.1 | - | 1210512   | 1210463   |
| Sma-1-60 | NS_000200.1    | - | 163110498 | 163110449 |
| Sma-1-61 | NW_003034555.1 | - | 9365      | 9299      |
| Sma-1-62 | NS_000200.1    | - | 327351571 | 327351505 |
| Sma-1-63 | NW_003037809.1 | - | 1654723   | 1654674   |
| Sma-1-64 | NS_000200.1    | - | 35319187  | 35319138  |
| Sma-1-65 | NW_003037914.1 | + | 1195479   | 1195556   |
| Sma-1-66 | NS_000200.1    | + | 161339729 | 161339806 |

|           |                |   |           |           |
|-----------|----------------|---|-----------|-----------|
| Sma-1-67  | NW_003037818.1 | + | 872839    | 872888    |
| Sma-1-68  | NS_000200.1    | + | 49588246  | 49588295  |
| Sma-1-69  | NW_003038261.1 | + | 255564    | 255613    |
| Sma-1-70  | NS_000200.1    | + | 323869215 | 323869264 |
| Sma-1-71  | NW_003038482.1 | - | 36460     | 36411     |
| Sma-1-72  | NS_000200.1    | - | 333013911 | 333013862 |
| Sma-1-73  | NW_003038010.1 | - | 400809    | 400760    |
| Sma-1-74  | NS_000200.1    | - | 227219032 | 227218983 |
| Sma-1-75  | NW_003038224.1 | + | 49354     | 49403     |
| Sma-1-76  | NS_000200.1    | + | 309461082 | 309461131 |
| Sma-1-77  | NW_003037822.1 | - | 834751    | 834702    |
| Sma-1-78  | NS_000200.1    | - | 55142757  | 55142708  |
| Sma-1-79  | NW_003038033.1 | + | 842856    | 842905    |
| Sma-1-80  | NS_000200.1    | + | 246822858 | 246822907 |
| Sma-1-81  | NW_003037891.1 | - | 109102    | 109053    |
| Sma-1-82  | NS_000200.1    | - | 137990380 | 137990331 |
| Sma-1-83  | NW_003038244.1 | + | 34664     | 34713     |
| Sma-1-84  | NS_000200.1    | + | 315179869 | 315179918 |
| Sma-1-85  | NW_003038149.1 | - | 7740      | 7691      |
| Sma-1-86  | NS_000200.1    | - | 291036353 | 291036304 |
| Sma-1-87  | NW_003026507.1 | + | 165321    | 165370    |
| Sma-1-88  | NS_000200.1    | + | 279825472 | 279825521 |
| Sma-1-89  | NW_003037824.1 | + | 313203    | 313252    |
| Sma-1-90  | NW_003037912.1 | + | 283210    | 283259    |
| Sma-1-91  | NS_000200.1    | + | 57244143  | 57244192  |
| Sma-1-92  | NS_000200.1    | + | 157094785 | 157094834 |
| Sma-1-93  | NW_003037806.1 | - | 1470978   | 1470929   |
| Sma-1-94  | NW_003038230.1 | - | 302012    | 301963    |
| Sma-1-95  | NS_000200.1    | - | 311587583 | 311587534 |
| Sma-1-96  | NS_000200.1    | - | 29666192  | 29666143  |
| Sma-1-97  | NW_003037836.1 | - | 750996    | 750947    |
| Sma-1-98  | NS_000200.1    | - | 76308095  | 76308046  |
| Sma-1-99  | NW_003038147.1 | - | 269128    | 269079    |
| Sma-1-100 | NS_000200.1    | - | 289796871 | 289796822 |
| Sma-1-101 | NW_003037893.1 | - | 34012     | 33963     |
| Sma-1-102 | NS_000200.1    | - | 141148322 | 141148273 |
| Sma-1-103 | NW_003037838.1 | - | 536400    | 536351    |
| Sma-1-104 | NS_000200.1    | - | 78534963  | 78534914  |
| Sma-1-105 | NW_003037809.1 | - | 2580359   | 2580310   |
| Sma-1-106 | NS_000200.1    | - | 36244823  | 36244774  |
| Sma-1-107 | NW_003022765.1 | - | 1972      | 1923      |
| Sma-1-108 | NW_003037938.1 | - | 770736    | 770687    |
| Sma-1-109 | NS_000200.1    | - | 368059217 | 368059168 |
| Sma-1-110 | NS_000200.1    | - | 182807849 | 182807800 |
| Sma-1-111 | NW_003026466.1 | + | 17305     | 17354     |
| Sma-1-112 | NS_000200.1    | + | 215284412 | 215284461 |
| Sma-1-113 | NW_003037974.1 | + | 229488    | 229537    |
| Sma-1-114 | NS_000200.1    | + | 204904794 | 204904843 |
| Sma-1-115 | NW_003037838.1 | + | 619123    | 619172    |
| Sma-1-116 | NS_000200.1    | + | 78617686  | 78617735  |
| Sma-1-117 | NW_003038086.1 | + | 271283    | 271332    |
| Sma-1-118 | NS_000200.1    | + | 272519876 | 272519925 |



|           |                |   |           |           |
|-----------|----------------|---|-----------|-----------|
| Sma-1-119 | NW_003038240.1 | + | 234883    | 234932    |
| Sma-1-120 | NS_000200.1    | + | 314373814 | 314373863 |
| Sma-1-121 | NW_003038074.1 | - | 106320    | 106271    |
| Sma-1-122 | NS_000200.1    | - | 265997700 | 265997651 |
| Sma-1-123 | NW_003032120.1 | - | 22643     | 22594     |
| Sma-1-124 | NS_000200.1    | - | 377847920 | 377847871 |
| Sma-1-125 | NW_003038030.1 | - | 460189    | 460140    |
| Sma-1-126 | NS_000200.1    | - | 243596056 | 243596007 |
| Sma-1-127 | NW_003037809.1 | + | 1574000   | 1574049   |
| Sma-1-128 | NS_000200.1    | + | 35238464  | 35238513  |
| Sma-1-129 | NW_003037818.1 | + | 231995    | 232044    |
| Sma-1-130 | NS_000200.1    | + | 48947402  | 48947451  |
| Sma-1-131 | NW_003037937.1 | + | 22138     | 22187     |
| Sma-1-132 | NS_000200.1    | + | 181222047 | 181222096 |
| Sma-1-133 | NW_003037791.1 | - | 690360    | 690311    |
| Sma-1-134 | NS_000200.1    | - | 382395788 | 382395739 |
| Sma-1-135 | NW_003037978.1 | + | 59086     | 59135     |
| Sma-1-136 | NS_000200.1    | + | 209327096 | 209327145 |
| Sma-1-137 | NW_003038012.1 | - | 36974     | 36925     |
| Sma-1-138 | NS_000200.1    | - | 228360913 | 228360864 |
| Sma-1-139 | NW_003035881.1 | + | 146650    | 146699    |
| Sma-1-140 | NS_000200.1    | + | 341210855 | 341210904 |
| Sma-1-141 | NW_003022582.1 | + | 1011      | 1060      |
| Sma-1-142 | NS_000200.1    | + | 365225464 | 365225513 |
| Sma-1-143 | NW_003038038.1 | - | 576472    | 576423    |
| Sma-1-144 | NS_000200.1    | - | 252479865 | 252479816 |
| Sma-1-145 | NW_003038109.1 | - | 62618     | 62569     |
| Sma-1-146 | NS_000200.1    | - | 275745296 | 275745247 |
| Sma-1-147 | NW_003038471.1 | + | 54464     | 54513     |
| Sma-1-148 | NS_000200.1    | + | 331895378 | 331895427 |
| Sma-1-149 | NW_003037894.1 | + | 174067    | 174116    |
| Sma-1-150 | NW_003037894.1 | - | 176261    | 176212    |
| Sma-1-151 | NS_000200.1    | + | 142070640 | 142070689 |
| Sma-1-152 | NS_000200.1    | - | 142072834 | 142072785 |
| Sma-1-153 | NW_003037943.1 | + | 855932    | 855981    |
| Sma-1-154 | NS_000200.1    | + | 187877465 | 187877514 |
| Sma-1-155 | NW_003037795.1 | - | 1462071   | 1462022   |
| Sma-1-156 | NS_000200.1    | - | 7852954   | 7852905   |
| Sma-1-157 | NW_003038517.1 | - | 259398    | 259349    |
| Sma-1-158 | NS_000200.1    | - | 341023886 | 341023837 |
| Sma-1-159 | NW_003037818.1 | + | 832747    | 832796    |
| Sma-1-160 | NS_000200.1    | + | 49548154  | 49548203  |
| Sma-1-161 | NW_003037944.1 | - | 769933    | 769885    |
| Sma-1-162 | NS_000200.1    | - | 188991286 | 188991238 |
| Sma-1-163 | NW_003037833.1 | - | 667772    | 667724    |
| Sma-1-164 | NS_000200.1    | - | 72858868  | 72858820  |
| Sma-1-165 | NW_003037858.1 | - | 70965     | 70917     |
| Sma-1-166 | NS_000200.1    | - | 100735241 | 100735193 |
| Sma-1-167 | NW_003035382.1 | - | 877       | 829       |
| Sma-1-168 | NS_000200.1    | - | 367376881 | 367376833 |
| Sma-1-169 | NW_003037806.1 | - | 1397509   | 1397460   |
| Sma-1-170 | NS_000200.1    | - | 29592723  | 29592674  |

|           |                |   |           |           |
|-----------|----------------|---|-----------|-----------|
| Sma-1-171 | NW_003037852.1 | - | 1049049   | 1049000   |
| Sma-1-172 | NS_000200.1    | - | 95440944  | 95440895  |
| Sma-1-173 | NW_003037862.1 | + | 784838    | 784887    |
| Sma-1-174 | NS_000200.1    | + | 106436499 | 106436548 |
| Sma-1-175 | NW_003037797.1 | + | 238608    | 238657    |
| Sma-1-176 | NS_000200.1    | + | 10666468  | 10666517  |
| Sma-1-177 | NW_003037827.1 | - | 972088    | 972039    |
| Sma-1-178 | NS_000200.1    | - | 63594229  | 63594180  |
| Sma-1-179 | NW_003028140.1 | - | 2294      | 2245      |
| Sma-1-180 | NS_000200.1    | - | 374137882 | 374137833 |
| Sma-1-181 | NW_003038156.1 | + | 467465    | 467514    |
| Sma-1-182 | NS_000200.1    | + | 295199578 | 295199627 |
| Sma-1-183 | NW_003038033.1 | - | 381204    | 381155    |
| Sma-1-184 | NS_000200.1    | - | 246361206 | 246361157 |
| Sma-1-185 | NW_003037940.1 | + | 831177    | 831226    |
| Sma-1-186 | NS_000200.1    | + | 184573307 | 184573356 |
| Sma-1-187 | NW_003037938.1 | - | 701411    | 701362    |
| Sma-1-188 | NS_000200.1    | - | 182738524 | 182738475 |
| Sma-1-189 | NW_003037820.1 | - | 194078    | 194029    |
| Sma-1-190 | NS_000200.1    | - | 52467060  | 52467011  |
| Sma-1-191 | NW_003039129.1 | - | 403955    | 403906    |
| Sma-1-192 | NS_000200.1    | - | 229358763 | 229358714 |
| Sma-1-193 | NW_003037837.1 | - | 674530    | 674481    |
| Sma-1-194 | NS_000200.1    | - | 77480388  | 77480339  |
| Sma-1-195 | NW_003038457.1 | + | 10365     | 10414     |
| Sma-1-196 | NS_000200.1    | + | 331092229 | 331092278 |
| Sma-1-197 | NW_003037853.1 | + | 761422    | 761471    |
| Sma-1-198 | NS_000200.1    | + | 96253473  | 96253522  |
| Sma-1-199 | NW_003031339.1 | + | 742       | 791       |
| Sma-1-200 | NW_003026471.1 | - | 120208    | 120159    |
| Sma-1-201 | NS_000200.1    | + | 345779720 | 345779769 |
| Sma-1-202 | NS_000200.1    | - | 222232441 | 222232392 |
| Sma-1-203 | NW_003037911.1 | - | 286521    | 286472    |
| Sma-1-204 | NS_000200.1    | - | 156073874 | 156073825 |
| Sma-1-205 | NW_003031319.1 | + | 48        | 97        |
| Sma-1-206 | NS_000200.1    | + | 345743695 | 345743744 |
| Sma-1-207 | NW_003037881.1 | - | 614014    | 613965    |
| Sma-1-208 | NS_000200.1    | - | 125045805 | 125045756 |
| Sma-1-209 | NW_003037796.1 | + | 112408    | 112457    |
| Sma-1-210 | NS_000200.1    | + | 8322052   | 8322101   |
| Sma-1-211 | NW_003037814.1 | + | 1683197   | 1683246   |
| Sma-1-212 | NS_000200.1    | + | 44667057  | 44667106  |
| Sma-1-213 | NW_003038011.1 | + | 184433    | 184482    |
| Sma-1-214 | NS_000200.1    | + | 227712083 | 227712132 |
| Sma-1-215 | NW_003038030.1 | + | 381248    | 381297    |
| Sma-1-216 | NS_000200.1    | + | 243517115 | 243517164 |
| Sma-1-217 | NW_003027564.1 | - | 551       | 502       |
| Sma-1-218 | NS_000200.1    | - | 361628937 | 361628888 |
| Sma-1-219 | NW_003032095.1 | - | 3914      | 3865      |
| Sma-1-220 | NS_000200.1    | - | 377687260 | 377687211 |
| Sma-1-221 | NW_003037953.1 | + | 152189    | 152238    |
| Sma-1-222 | NS_000200.1    | + | 193065240 | 193065289 |

|           |                |   |           |           |
|-----------|----------------|---|-----------|-----------|
| Sma-1-223 | NW_003037972.1 | + | 167093    | 167142    |
| Sma-1-224 | NS_000200.1    | + | 202642797 | 202642846 |
| Sma-1-225 | NW_003037851.1 | + | 383270    | 383319    |
| Sma-1-226 | NS_000200.1    | + | 93786580  | 93786629  |
| Sma-1-227 | NW_003038232.1 | + | 292624    | 292673    |
| Sma-1-228 | NS_000200.1    | + | 312256415 | 312256464 |
| Sma-1-229 | NW_003037858.1 | + | 827763    | 827812    |
| Sma-1-230 | NS_000200.1    | + | 101492039 | 101492088 |
| Sma-1-231 | NW_003035643.1 | - | 5019      | 4970      |
| Sma-1-232 | NS_000200.1    | - | 330305454 | 330305405 |
| Sma-1-233 | NW_003037865.1 | + | 85717     | 85766     |
| Sma-1-234 | NS_000200.1    | + | 110507636 | 110507685 |
| Sma-1-235 | NW_003037901.1 | + | 602143    | 602192    |
| Sma-1-236 | NS_000200.1    | + | 146450604 | 146450653 |
| Sma-1-237 | NW_003037954.1 | + | 3901      | 3950      |
| Sma-1-238 | NS_000200.1    | + | 193233523 | 193233572 |
| Sma-1-239 | NW_003037952.1 | - | 2257      | 2208      |
| Sma-1-240 | NS_000200.1    | - | 192822390 | 192822341 |
| Sma-1-241 | NW_003037824.1 | + | 431744    | 431793    |
| Sma-1-242 | NS_000200.1    | + | 57362684  | 57362733  |
| Sma-1-243 | NW_003039127.1 | + | 2249263   | 2249312   |
| Sma-1-244 | NS_000200.1    | + | 115326762 | 115326811 |
| Sma-1-245 | NW_003032120.1 | + | 90300     | 90349     |
| Sma-1-246 | NS_000200.1    | + | 377915577 | 377915626 |
| Sma-1-247 | NW_003038254.1 | + | 151660    | 151709    |
| Sma-1-248 | NS_000200.1    | + | 320187218 | 320187267 |
| Sma-1-249 | NW_003038251.1 | - | 97714     | 97665     |
| Sma-1-250 | NS_000200.1    | - | 318429486 | 318429437 |
| Sma-1-251 | NW_003038462.1 | - | 50308     | 50259     |
| Sma-1-252 | NS_000200.1    | - | 331417971 | 331417922 |
| Sma-1-253 | NW_003037979.1 | - | 672776    | 672727    |
| Sma-1-254 | NS_000200.1    | - | 210733796 | 210733747 |
| Sma-1-255 | NW_003037939.1 | + | 466211    | 466260    |
| Sma-1-256 | NS_000200.1    | + | 183335965 | 183336014 |
| Sma-1-257 | NW_003026615.1 | - | 109697    | 109648    |
| Sma-1-258 | NS_000200.1    | - | 317104138 | 317104089 |
| Sma-1-259 | NW_003026597.1 | - | 36597     | 36548     |
| Sma-1-260 | NS_000200.1    | - | 305657783 | 305657734 |
| Sma-1-261 | NW_003037815.1 | + | 474425    | 474474    |
| Sma-1-262 | NS_000200.1    | + | 45737416  | 45737465  |
| Sma-1-263 | NW_003037872.1 | + | 234505    | 234554    |
| Sma-1-264 | NS_000200.1    | + | 118191511 | 118191560 |
| Sma-1-265 | NW_003037794.1 | - | 1812961   | 1812912   |
| Sma-1-266 | NS_000200.1    | - | 5992556   | 5992507   |
| Sma-1-267 | NW_003037828.1 | - | 776515    | 776466    |
| Sma-1-268 | NS_000200.1    | - | 65866000  | 65865951  |
| Sma-1-269 | NW_003037851.1 | - | 694079    | 694030    |
| Sma-1-270 | NS_000200.1    | - | 94097389  | 94097340  |
| Sma-1-271 | NW_003037884.1 | - | 1240855   | 1240806   |
| Sma-1-272 | NS_000200.1    | - | 128020520 | 128020471 |
| Sma-1-273 | NW_003037909.1 | + | 396654    | 396703    |
| Sma-1-274 | NS_000200.1    | + | 153938303 | 153938352 |

|           |                |   |           |           |
|-----------|----------------|---|-----------|-----------|
| Sma-1-275 | NW_003038142.1 | - | 387114    | 387065    |
| Sma-1-276 | NS_000200.1    | - | 287597550 | 287597501 |
| Sma-1-277 | NW_003038027.1 | + | 86006     | 86055     |
| Sma-1-278 | NS_000200.1    | + | 240456720 | 240456769 |
| Sma-1-279 | NW_003036423.1 | - | 753       | 704       |
| Sma-1-280 | NS_000200.1    | - | 359945478 | 359945429 |
| Sma-1-281 | NW_003038017.1 | - | 426124    | 426066    |
| Sma-1-282 | NS_000200.1    | - | 232192155 | 232192097 |
| Sma-1-283 | NW_003037797.1 | + | 2150502   | 2150551   |
| Sma-1-284 | NS_000200.1    | + | 12578362  | 12578411  |
| Sma-1-285 | NW_003038151.1 | - | 199495    | 199446    |
| Sma-1-286 | NS_000200.1    | - | 292106738 | 292106689 |
| Sma-1-287 | NW_003037797.1 | - | 2817884   | 2817835   |
| Sma-1-288 | NS_000200.1    | - | 13245744  | 13245695  |
| Sma-1-289 | NW_003037909.1 | - | 52348     | 52301     |
| Sma-1-290 | NS_000200.1    | - | 153593997 | 153593950 |
| Sma-1-291 | NW_003037891.1 | - | 2130259   | 2130211   |
| Sma-1-292 | NS_000200.1    | - | 140011537 | 140011489 |
| Sma-1-293 | NW_003038476.1 | - | 9097      | 9049      |
| Sma-1-294 | NS_000200.1    | - | 332397472 | 332397424 |
| Sma-1-295 | NW_003037870.1 | - | 62943     | 62878     |
| Sma-1-296 | NS_000200.1    | - | 116936608 | 116936543 |
| Sma-1-297 | NW_003038041.1 | - | 33873     | 33825     |
| Sma-1-298 | NS_000200.1    | - | 253701155 | 253701107 |
| Sma-1-299 | NW_003038086.1 | + | 79205     | 79254     |
| Sma-1-300 | NS_000200.1    | + | 272327798 | 272327847 |
| Sma-1-301 | NW_003038025.1 | + | 569355    | 569403    |
| Sma-1-302 | NS_000200.1    | + | 239427600 | 239427648 |
| Sma-1-303 | NW_003037811.1 | + | 1137033   | 1137082   |
| Sma-1-304 | NS_000200.1    | + | 39307275  | 39307324  |
| Sma-1-305 | NW_003026472.1 | - | 105618    | 105569    |
| Sma-1-306 | NS_000200.1    | - | 236517610 | 236517561 |
| Sma-1-307 | NW_003037839.1 | - | 1090703   | 1090654   |
| Sma-1-308 | NS_000200.1    | - | 80048853  | 80048804  |
| Sma-1-309 | NW_003028385.1 | + | 203       | 252       |
| Sma-1-310 | NS_000200.1    | + | 369491653 | 369491702 |
| Sma-1-311 | NW_003038149.1 | - | 47394     | 47345     |
| Sma-1-312 | NS_000200.1    | - | 291076007 | 291075958 |
| Sma-1-313 | NW_003038155.1 | + | 374584    | 374633    |
| Sma-1-314 | NS_000200.1    | + | 294497702 | 294497751 |
| Sma-1-315 | NW_003038252.1 | - | 126047    | 125998    |
| Sma-1-316 | NS_000200.1    | - | 318981635 | 318981586 |
| Sma-1-317 | NW_003022234.1 | + | 966       | 1015      |
| Sma-1-318 | NW_003037841.1 | - | 1101172   | 1101123   |
| Sma-1-319 | NS_000200.1    | + | 360981282 | 360981331 |
| Sma-1-320 | NS_000200.1    | - | 83712353  | 83712304  |
| Sma-1-321 | NW_003022092.1 | + | 121       | 170       |
| Sma-1-322 | NS_000200.1    | + | 355607555 | 355607604 |
| Sma-1-323 | NW_003038003.1 | + | 184335    | 184384    |
| Sma-1-324 | NS_000200.1    | + | 223683617 | 223683666 |
| Sma-1-325 | NW_003038161.1 | - | 469587    | 469538    |
| Sma-1-326 | NS_000200.1    | - | 297839438 | 297839389 |

|           |                |   |           |           |
|-----------|----------------|---|-----------|-----------|
| Sma-1-327 | NW_003037930.1 | + | 899450    | 899499    |
| Sma-1-328 | NS_000200.1    | + | 176757414 | 176757463 |
| Sma-1-329 | NW_003037907.1 | - | 93135     | 93086     |
| Sma-1-330 | NS_000200.1    | - | 151497624 | 151497575 |
| Sma-1-331 | NW_003037860.1 | + | 219605    | 219654    |
| Sma-1-332 | NS_000200.1    | + | 103962633 | 103962682 |
| Sma-1-333 | NW_003032160.1 | - | 42051     | 42002     |
| Sma-1-334 | NS_000200.1    | - | 381050137 | 381050088 |
| Sma-1-335 | NW_003037846.1 | - | 284376    | 284327    |
| Sma-1-336 | NS_000200.1    | - | 87918946  | 87918897  |
| Sma-1-337 | NW_003038508.1 | + | 49811     | 49860     |
| Sma-1-338 | NS_000200.1    | + | 337156779 | 337156828 |
| Sma-1-339 | NW_003026466.1 | + | 128780    | 128829    |
| Sma-1-340 | NS_000200.1    | + | 215395887 | 215395936 |
| Sma-1-341 | NW_003037821.1 | - | 223029    | 222980    |
| Sma-1-342 | NS_000200.1    | - | 53367513  | 53367464  |
| Sma-1-343 | NW_003038085.1 | - | 492485    | 492436    |
| Sma-1-344 | NS_000200.1    | - | 272182578 | 272182529 |
| Sma-1-345 | NW_003021210.1 | + | 55        | 104       |
| Sma-1-346 | NS_000200.1    | + | 371593684 | 371593733 |
| Sma-1-347 | NW_003037984.1 | - | 1940      | 1891      |
| Sma-1-348 | NS_000200.1    | - | 215073028 | 215072979 |
| Sma-1-349 | NW_003028291.1 | - | 849       | 800       |
| Sma-1-350 | NW_003038488.1 | + | 109424    | 109473    |
| Sma-1-351 | NS_000200.1    | + | 333706481 | 333706530 |
| Sma-1-352 | NS_000200.1    | - | 374487322 | 374487273 |
| Sma-1-353 | NW_003026458.1 | - | 719219    | 719170    |
| Sma-1-354 | NS_000200.1    | - | 102587449 | 102587400 |
| Sma-1-355 | NW_003037852.1 | + | 151815    | 151864    |
| Sma-1-356 | NS_000200.1    | + | 94543710  | 94543759  |
| Sma-1-357 | NW_003037795.1 | + | 353306    | 353355    |
| Sma-1-358 | NS_000200.1    | + | 6744189   | 6744238   |
| Sma-1-359 | NW_003038016.1 | + | 108073    | 108122    |
| Sma-1-360 | NS_000200.1    | + | 231224610 | 231224659 |
| Sma-1-361 | NW_003022661.1 | + | 2259      | 2308      |
| Sma-1-362 | NS_000200.1    | + | 365375070 | 365375119 |
| Sma-1-363 | NW_003037916.1 | - | 1351016   | 1350967   |
| Sma-1-364 | NS_000200.1    | - | 164544427 | 164544378 |
| Sma-1-365 | NW_003038001.1 | - | 376789    | 376740    |
| Sma-1-366 | NS_000200.1    | - | 223086350 | 223086301 |
| Sma-1-367 | NW_003037795.1 | - | 1162451   | 1162402   |
| Sma-1-368 | NS_000200.1    | - | 7553334   | 7553285   |
| Sma-1-369 | NW_003037796.1 | - | 94604     | 94555     |
| Sma-1-370 | NS_000200.1    | - | 8304248   | 8304199   |
| Sma-1-371 | NW_003038037.1 | - | 1435907   | 1435858   |
| Sma-1-372 | NS_000200.1    | - | 251591316 | 251591267 |
| Sma-1-373 | NW_003035881.1 | - | 317742    | 317693    |
| Sma-1-374 | NS_000200.1    | - | 341381947 | 341381898 |
| Sma-1-375 | NW_003037979.1 | + | 389130    | 389179    |
| Sma-1-376 | NS_000200.1    | + | 210450150 | 210450199 |
| Sma-1-377 | NW_003038037.1 | - | 1620357   | 1620308   |
| Sma-1-378 | NS_000200.1    | - | 251775766 | 251775717 |

|           |                |   |           |           |
|-----------|----------------|---|-----------|-----------|
| Sma-1-379 | NW_003038255.1 | - | 282592    | 282543    |
| Sma-1-380 | NS_000200.1    | - | 320671737 | 320671688 |
| Sma-1-381 | NW_003037807.1 | + | 176583    | 176632    |
| Sma-1-382 | NS_000200.1    | + | 30438099  | 30438148  |
| Sma-1-383 | NW_003032078.1 | + | 11481     | 11530     |
| Sma-1-384 | NS_000200.1    | + | 377345570 | 377345619 |
| Sma-1-385 | NW_003026517.1 | + | 406865    | 406914    |
| Sma-1-386 | NS_000200.1    | + | 300012874 | 300012923 |
| Sma-1-387 | NW_003037854.1 | - | 1512427   | 1512378   |
| Sma-1-388 | NS_000200.1    | - | 98416848  | 98416799  |
| Sma-1-389 | NW_003037838.1 | + | 319456    | 319505    |
| Sma-1-390 | NS_000200.1    | + | 78318019  | 78318068  |
| Sma-1-391 | NW_003038071.1 | - | 39365     | 39316     |
| Sma-1-392 | NS_000200.1    | - | 264842408 | 264842359 |
| Sma-1-393 | NW_003037940.1 | - | 283309    | 283260    |
| Sma-1-394 | NS_000200.1    | - | 184025439 | 184025390 |
| Sma-1-395 | NW_003020906.1 | + | 743       | 792       |
| Sma-1-396 | NS_000200.1    | + | 364673334 | 364673383 |
| Sma-1-397 | NW_003037837.1 | + | 596053    | 596102    |
| Sma-1-398 | NS_000200.1    | + | 77401911  | 77401960  |
| Sma-1-399 | NW_003037859.1 | + | 102808    | 102857    |
| Sma-1-400 | NS_000200.1    | + | 102781649 | 102781698 |
| Sma-1-401 | NW_003026517.1 | + | 612020    | 612069    |
| Sma-1-402 | NS_000200.1    | + | 300218029 | 300218078 |
| Sma-1-403 | NW_003037887.1 | + | 1155155   | 1155204   |
| Sma-1-404 | NS_000200.1    | + | 131619133 | 131619182 |
| Sma-1-405 | NW_003037999.1 | + | 128773    | 128822    |
| Sma-1-406 | NS_000200.1    | + | 221823327 | 221823376 |
| Sma-1-407 | NW_003038462.1 | - | 55831     | 55782     |
| Sma-1-408 | NS_000200.1    | - | 331423494 | 331423445 |
| Sma-1-409 | NW_003038023.1 | + | 433574    | 433623    |
| Sma-1-410 | NS_000200.1    | + | 237593865 | 237593914 |
| Sma-1-411 | NW_003038029.1 | - | 805670    | 805621    |
| Sma-1-412 | NS_000200.1    | - | 243006571 | 243006522 |
| Sma-1-413 | NW_003038033.1 | - | 40050     | 40001     |
| Sma-1-414 | NS_000200.1    | - | 246020052 | 246020003 |
| Sma-1-415 | NW_003037978.1 | - | 554314    | 554265    |
| Sma-1-416 | NS_000200.1    | - | 209822324 | 209822275 |
| Sma-1-417 | NW_003037906.1 | + | 90335     | 90384     |
| Sma-1-418 | NS_000200.1    | + | 150398114 | 150398163 |
| Sma-1-419 | NW_003038239.1 | - | 6372      | 6323      |
| Sma-1-420 | NS_000200.1    | - | 313847154 | 313847105 |
| Sma-1-421 | NW_003037901.1 | + | 514981    | 515030    |
| Sma-1-422 | NS_000200.1    | + | 146363442 | 146363491 |
| Sma-1-423 | NW_003037796.1 | - | 1729007   | 1728958   |
| Sma-1-424 | NS_000200.1    | - | 9938651   | 9938602   |
| Sma-1-425 | NW_003038013.1 | + | 207804    | 207853    |
| Sma-1-426 | NS_000200.1    | + | 229597430 | 229597479 |
| Sma-1-427 | NW_003038251.1 | - | 32119     | 32070     |
| Sma-1-428 | NS_000200.1    | - | 318363891 | 318363842 |
| Sma-1-429 | NW_003026517.1 | + | 402327    | 402376    |
| Sma-1-430 | NS_000200.1    | + | 300008336 | 300008385 |

|           |                |   |           |           |
|-----------|----------------|---|-----------|-----------|
| Sma-1-431 | NW_003038097.1 | - | 26917     | 26868     |
| Sma-1-432 | NS_000200.1    | - | 274277219 | 274277170 |
| Sma-1-433 | NW_003037909.1 | + | 496829    | 496879    |
| Sma-1-434 | NS_000200.1    | + | 154038478 | 154038528 |
| Sma-1-435 | NW_003037796.1 | + | 203604    | 203653    |
| Sma-1-436 | NS_000200.1    | + | 8413248   | 8413297   |
| Sma-1-437 | NW_003038023.1 | - | 317688    | 317639    |
| Sma-1-438 | NS_000200.1    | - | 237477979 | 237477930 |
| Sma-1-439 | NW_003026472.1 | + | 395223    | 395272    |
| Sma-1-440 | NS_000200.1    | + | 236807215 | 236807264 |
| Sma-1-441 | NW_003037944.1 | - | 540713    | 540663    |
| Sma-1-442 | NS_000200.1    | - | 188762066 | 188762016 |
| Sma-1-443 | NW_003037860.1 | - | 530752    | 530703    |
| Sma-1-444 | NS_000200.1    | - | 104273780 | 104273731 |
| Sma-1-445 | NW_003037836.1 | + | 751163    | 751212    |
| Sma-1-446 | NS_000200.1    | + | 76308262  | 76308311  |
| Sma-1-447 | NW_003038159.1 | + | 82041     | 82090     |
| Sma-1-448 | NS_000200.1    | + | 296470062 | 296470111 |
| Sma-1-449 | NW_003038005.1 | - | 295989    | 295940    |
| Sma-1-450 | NS_000200.1    | - | 224701943 | 224701894 |
| Sma-1-451 | NW_003037822.1 | + | 370352    | 370401    |
| Sma-1-452 | NS_000200.1    | + | 54678358  | 54678407  |
| Sma-1-453 | NW_003037996.1 | - | 225723    | 225674    |
| Sma-1-454 | NS_000200.1    | - | 220470599 | 220470550 |
| Sma-1-455 | NW_003037911.1 | + | 132358    | 132407    |
| Sma-1-456 | NS_000200.1    | + | 155919711 | 155919760 |
| Sma-1-457 | NW_003037818.1 | - | 361799    | 361750    |
| Sma-1-458 | NS_000200.1    | - | 49077206  | 49077157  |
| Sma-1-459 | NW_003038008.1 | + | 217739    | 217788    |
| Sma-1-460 | NS_000200.1    | + | 225890835 | 225890884 |
| Sma-1-461 | NW_003035869.1 | - | 154908    | 154859    |
| Sma-1-462 | NS_000200.1    | - | 335339108 | 335339059 |
| Sma-1-463 | NW_003037883.1 | + | 244213    | 244262    |
| Sma-1-464 | NS_000200.1    | + | 126307936 | 126307985 |
| Sma-1-465 | NW_003037858.1 | - | 1168105   | 1168056   |
| Sma-1-466 | NS_000200.1    | - | 101832381 | 101832332 |
| Sma-1-467 | NW_003037863.1 | - | 1028759   | 1028710   |
| Sma-1-468 | NS_000200.1    | - | 107787126 | 107787077 |
| Sma-1-469 | NW_003037836.1 | - | 671007    | 670958    |
| Sma-1-470 | NS_000200.1    | - | 76228106  | 76228057  |
| Sma-1-471 | NW_003037930.1 | + | 793533    | 793582    |
| Sma-1-472 | NS_000200.1    | + | 176651497 | 176651546 |
| Sma-1-473 | NW_003038106.1 | - | 40834     | 40785     |
| Sma-1-474 | NS_000200.1    | - | 275229599 | 275229550 |
| Sma-1-475 | NW_003038038.1 | - | 320028    | 319979    |
| Sma-1-476 | NS_000200.1    | - | 252223421 | 252223372 |
| Sma-1-477 | NW_003037797.1 | + | 407896    | 407945    |
| Sma-1-478 | NS_000200.1    | + | 10835756  | 10835805  |
| Sma-1-479 | NW_003037810.1 | - | 47052     | 47003     |
| Sma-1-480 | NS_000200.1    | - | 36651574  | 36651525  |
| Sma-1-481 | NW_003037850.1 | - | 1134801   | 1134752   |
| Sma-1-482 | NS_000200.1    | - | 93120831  | 93120782  |

|           |                |   |           |           |
|-----------|----------------|---|-----------|-----------|
| Sma-1-483 | NW_003026516.1 | - | 343050    | 343001    |
| Sma-1-484 | NS_000200.1    | - | 299451347 | 299451298 |
| Sma-1-485 | NW_003037818.1 | + | 2068554   | 2068603   |
| Sma-1-486 | NS_000200.1    | + | 50783961  | 50784010  |
| Sma-1-487 | NW_003038244.1 | + | 187257    | 187306    |
| Sma-1-488 | NS_000200.1    | + | 315332462 | 315332511 |
| Sma-1-489 | NW_003037683.1 | + | 842       | 891       |
| Sma-1-490 | NS_000200.1    | + | 375148418 | 375148467 |
| Sma-1-491 | NW_003037698.1 | + | 3292      | 3341      |
| Sma-1-492 | NS_000200.1    | + | 375499359 | 375499408 |
| Sma-1-493 | NW_003038085.1 | + | 501843    | 501892    |
| Sma-1-494 | NS_000200.1    | + | 272191936 | 272191985 |
| Sma-1-495 | NW_003037794.1 | - | 884879    | 884830    |
| Sma-1-496 | NS_000200.1    | - | 5064474   | 5064425   |
| Sma-1-497 | NW_003038161.1 | + | 239178    | 239227    |
| Sma-1-498 | NS_000200.1    | + | 297609029 | 297609078 |
| Sma-1-499 | NW_003037977.1 | - | 840532    | 840483    |
| Sma-1-500 | NS_000200.1    | - | 209126552 | 209126503 |
| Sma-1-501 | NW_003037966.1 | - | 478350    | 478301    |
| Sma-1-502 | NS_000200.1    | - | 199180213 | 199180164 |
| Sma-1-503 | NW_003038257.1 | - | 207309    | 207260    |
| Sma-1-504 | NS_000200.1    | - | 321381637 | 321381588 |
| Sma-1-505 | NW_003037853.1 | - | 611435    | 611386    |
| Sma-1-506 | NS_000200.1    | - | 96103486  | 96103437  |
| Sma-1-507 | NW_003037994.1 | - | 474647    | 474598    |
| Sma-1-508 | NS_000200.1    | - | 219006461 | 219006412 |
| Sma-1-509 | NW_003025858.1 | + | 51        | 100       |
| Sma-1-510 | NW_003037824.1 | - | 346002    | 345953    |
| Sma-1-511 | NS_000200.1    | + | 356643902 | 356643951 |
| Sma-1-512 | NS_000200.1    | - | 57276942  | 57276893  |
| Sma-1-513 | NW_003026621.1 | - | 2296      | 2247      |
| Sma-1-514 | NS_000200.1    | - | 324845690 | 324845641 |
| Sma-1-515 | NW_003032268.1 | - | 23915     | 23866     |
| Sma-1-516 | NS_000200.1    | - | 358284675 | 358284626 |
| Sma-1-517 | NW_003026608.1 | + | 40450     | 40499     |
| Sma-1-518 | NS_000200.1    | + | 309318570 | 309318619 |
| Sma-1-519 | NW_003033782.1 | - | 5600      | 5550      |
| Sma-1-520 | NS_000200.1    | - | 358957906 | 358957856 |
| Sma-1-521 | NW_003037940.1 | + | 573487    | 573536    |
| Sma-1-522 | NS_000200.1    | + | 184315617 | 184315666 |
| Sma-1-523 | NW_003037806.1 | + | 1105337   | 1105386   |
| Sma-1-524 | NS_000200.1    | + | 29300551  | 29300600  |
| Sma-1-525 | NW_003038070.1 | + | 396023    | 396072    |
| Sma-1-526 | NS_000200.1    | + | 264733264 | 264733313 |
| Sma-1-527 | NW_003038163.1 | + | 606832    | 606881    |
| Sma-1-528 | NS_000200.1    | + | 299007112 | 299007161 |
| Sma-1-529 | NW_003037881.1 | - | 352329    | 352280    |
| Sma-1-530 | NS_000200.1    | - | 124784120 | 124784071 |
| Sma-1-531 | NW_003037797.1 | + | 1635731   | 1635780   |
| Sma-1-532 | NS_000200.1    | + | 12063591  | 12063640  |
| Sma-1-533 | NW_003039127.1 | + | 366449    | 366498    |
| Sma-1-534 | NS_000200.1    | + | 113443948 | 113443997 |



|           |                |   |           |           |
|-----------|----------------|---|-----------|-----------|
| Sma-1-535 | NW_003026619.1 | + | 100641    | 100690    |
| Sma-1-536 | NS_000200.1    | + | 322291385 | 322291434 |
| Sma-1-537 | NW_003037978.1 | + | 456818    | 456867    |
| Sma-1-538 | NS_000200.1    | + | 209724828 | 209724877 |
| Sma-1-539 | NW_003026484.1 | + | 15526     | 15575     |
| Sma-1-540 | NS_000200.1    | + | 256978217 | 256978266 |
| Sma-1-541 | NW_003026474.1 | - | 65233     | 65184     |
| Sma-1-542 | NS_000200.1    | - | 253263808 | 253263759 |
| Sma-1-543 | NW_003037913.1 | - | 949788    | 949739    |
| Sma-1-544 | NS_000200.1    | - | 159513539 | 159513490 |
| Sma-1-545 | NW_003037835.1 | - | 514955    | 514906    |
| Sma-1-546 | NS_000200.1    | - | 74911463  | 74911414  |
| Sma-1-547 | NW_003033782.1 | + | 151       | 200       |
| Sma-1-548 | NW_003038001.1 | + | 379833    | 379882    |
| Sma-1-549 | NS_000200.1    | + | 223089394 | 223089443 |
| Sma-1-550 | NS_000200.1    | + | 358952457 | 358952506 |
| Sma-1-551 | NW_003038083.1 | - | 35564     | 35515     |
| Sma-1-552 | NS_000200.1    | - | 270278901 | 270278852 |
| Sma-1-553 | NW_003026465.1 | + | 547485    | 547534    |
| Sma-1-554 | NS_000200.1    | + | 207940079 | 207940128 |
| Sma-1-555 | NW_003037918.1 | - | 2137985   | 2137936   |
| Sma-1-556 | NS_000200.1    | - | 168704975 | 168704926 |
| Sma-1-557 | NW_003037805.1 | - | 1032214   | 1032165   |
| Sma-1-558 | NS_000200.1    | - | 27590058  | 27590009  |
| env-78    | AB231864.1     | + | 86311     | 86360     |
| Sma-1-559 | NW_003037980.1 | + | 263935    | 263984    |
| Sma-1-560 | NS_000200.1    | + | 211224797 | 211224846 |
| Sma-1-561 | NW_003037787.1 | - | 1385      | 1336      |
| Sma-1-562 | NS_000200.1    | - | 380249554 | 380249505 |
| Sma-1-563 | NW_003026456.1 | - | 301597    | 301548    |
| Sma-1-564 | NS_000200.1    | - | 58224733  | 58224684  |
| Sma-1-565 | NW_003038058.1 | - | 379088    | 379039    |
| Sma-1-566 | NS_000200.1    | - | 260210288 | 260210239 |
| Sma-1-567 | NW_003037971.1 | + | 630216    | 630265    |
| Sma-1-568 | NS_000200.1    | + | 202252266 | 202252315 |
| Sma-1-569 | NW_003026515.1 | - | 179612    | 179563    |
| Sma-1-570 | NS_000200.1    | - | 290824023 | 290823974 |
| Sma-1-571 | NW_003037823.1 | + | 245857    | 245906    |
| Sma-1-572 | NS_000200.1    | + | 56162476  | 56162525  |
| Sma-1-573 | NW_003026594.1 | + | 9623      | 9672      |
| Sma-1-574 | NS_000200.1    | + | 304953993 | 304954042 |
| Sma-1-575 | NW_003037918.1 | + | 1252048   | 1252097   |
| Sma-1-576 | NS_000200.1    | + | 167819038 | 167819087 |
| Sma-1-577 | NW_003037834.1 | - | 807224    | 807175    |
| Sma-1-578 | NS_000200.1    | - | 73967710  | 73967661  |
| Sma-1-579 | NW_003037788.1 | + | 107143    | 107192    |
| Sma-1-580 | NS_000200.1    | + | 380554381 | 380554430 |
| Sma-1-581 | NW_003037796.1 | - | 1676597   | 1676548   |
| Sma-1-582 | NS_000200.1    | - | 9886241   | 9886192   |
| Sma-1-583 | NW_003037823.1 | + | 251462    | 251511    |
| Sma-1-584 | NS_000200.1    | + | 56168081  | 56168130  |
| Sma-1-585 | NW_003037888.1 | + | 1217615   | 1217664   |

|           |                   |   |           |           |
|-----------|-------------------|---|-----------|-----------|
| Sma-1-586 | NS_000200.1       | + | 133426107 | 133426156 |
| Sma-1-587 | NW_003038084.1    | + | 118897    | 118946    |
| Sma-1-588 | NS_000200.1       | + | 271134141 | 271134190 |
| Sma-1-589 | NW_003038147.1    | + | 121550    | 121599    |
| Sma-1-590 | NS_000200.1       | + | 289649293 | 289649342 |
| Sma-1-591 | NW_003037797.1    | + | 2518052   | 2518101   |
| Sma-1-592 | NW_003037813.1    | + | 722755    | 722804    |
| Sma-1-593 | NS_000200.1       | + | 12945912  | 12945961  |
| Sma-1-594 | NS_000200.1       | + | 41709618  | 41709667  |
| Sma-1-595 | NW_003037916.1    | + | 625037    | 625086    |
| Sma-1-596 | NS_000200.1       | + | 163818448 | 163818497 |
| Sma-1-597 | NW_003037841.1    | - | 477218    | 477169    |
| Sma-1-598 | NW_003037868.1    | + | 480071    | 480120    |
| Sma-1-599 | NS_000200.1       | + | 116451783 | 116451832 |
| Sma-1-600 | NS_000200.1       | - | 83088399  | 83088350  |
| Tcr-1-1   | NZ_AAHK01026755.1 | + | 172       | 221       |
| Sma-1-601 | NW_003037916.1    | - | 1682574   | 1682525   |
| Sma-1-602 | NS_000200.1       | - | 164875985 | 164875936 |
| Sma-1-603 | NW_003037831.1    | - | 773070    | 773021    |
| Sma-1-604 | NS_000200.1       | - | 70222372  | 70222323  |
| Sma-1-605 | NW_003037822.1    | - | 314443    | 314394    |
| Sma-1-606 | NS_000200.1       | - | 54622449  | 54622400  |
| Sma-1-607 | NW_003037940.1    | - | 178299    | 178250    |
| Sma-1-608 | NS_000200.1       | - | 183920429 | 183920380 |
| Sma-1-609 | NW_003038151.1    | + | 214097    | 214146    |
| Sma-1-610 | NS_000200.1       | + | 292121340 | 292121389 |
| Sma-1-611 | NW_003029307.1    | - | 286       | 237       |
| Sma-1-612 | NS_000200.1       | - | 357258996 | 357258947 |
| Sma-1-613 | NW_003038224.1    | - | 68321     | 68272     |
| Sma-1-614 | NS_000200.1       | - | 309480049 | 309480000 |
| Sma-1-615 | NW_003037796.1    | + | 400256    | 400305    |
| Sma-1-616 | NS_000200.1       | + | 8609900   | 8609949   |
| Sma-1-617 | NW_003037971.1    | + | 840256    | 840305    |
| Sma-1-618 | NS_000200.1       | + | 202462306 | 202462355 |
| Sma-1-619 | NW_003037800.1    | - | 1705452   | 1705403   |
| Sma-1-620 | NS_000200.1       | - | 20334812  | 20334763  |
| Sma-1-621 | NW_003038161.1    | - | 490818    | 490769    |
| Sma-1-622 | NS_000200.1       | - | 297860669 | 297860620 |
| Sma-1-623 | NW_003038077.1    | + | 406768    | 406817    |
| Sma-1-624 | NS_000200.1       | + | 267178408 | 267178457 |
| Sma-1-625 | NW_003038024.1    | + | 738469    | 738518    |
| Sma-1-626 | NS_000200.1       | + | 238635498 | 238635547 |
| Sma-1-627 | NW_003037965.1    | + | 6715      | 6764      |
| Sma-1-628 | NS_000200.1       | + | 198295800 | 198295849 |
| Sma-1-629 | NW_003037798.1    | + | 480286    | 480335    |
| Sma-1-630 | NS_000200.1       | + | 14739444  | 14739493  |
| Sma-1-631 | NW_003037935.1    | - | 685278    | 685229    |
| Sma-1-632 | NS_000200.1       | - | 180101813 | 180101764 |
| Sma-1-633 | NW_003037916.1    | - | 837040    | 836991    |
| Sma-1-634 | NS_000200.1       | - | 164030451 | 164030402 |
| Sma-1-635 | NW_003038241.1    | - | 175695    | 175646    |
| Sma-1-636 | NS_000200.1       | - | 314638400 | 314638351 |

|           |                |   |           |           |
|-----------|----------------|---|-----------|-----------|
| Sma-1-637 | NW_003037895.1 | + | 292226    | 292275    |
| Sma-1-638 | NS_000200.1    | + | 142738428 | 142738477 |
| Sma-1-639 | NW_003037809.1 | - | 1397739   | 1397690   |
| Sma-1-640 | NS_000200.1    | - | 35062203  | 35062154  |
| Sma-1-641 | NW_003038131.1 | - | 211278    | 211229    |
| Sma-1-642 | NS_000200.1    | - | 282173122 | 282173073 |
| Sma-1-643 | NW_003037923.1 | + | 102090    | 102139    |
| Sma-1-644 | NS_000200.1    | + | 171158303 | 171158352 |
| Sma-1-645 | NW_003038013.1 | - | 239752    | 239703    |
| Sma-1-646 | NS_000200.1    | - | 229629378 | 229629329 |
| Sma-1-647 | NW_003037868.1 | + | 118548    | 118597    |
| Sma-1-648 | NS_000200.1    | + | 116090260 | 116090309 |
| Sma-1-649 | NW_003037917.1 | + | 1237998   | 1238047   |
| Sma-1-650 | NS_000200.1    | + | 166274802 | 166274851 |
| Sma-1-651 | NW_003037851.1 | + | 522070    | 522120    |
| Sma-1-652 | NS_000200.1    | + | 93925380  | 93925430  |
| Sma-1-653 | NW_003037844.1 | - | 282977    | 282928    |
| Sma-1-654 | NS_000200.1    | - | 86466423  | 86466374  |
| Sma-1-655 | NW_003038261.1 | - | 1056544   | 1056495   |
| Sma-1-656 | NS_000200.1    | - | 324670195 | 324670146 |
| Sma-1-657 | NW_003037807.1 | - | 1216446   | 1216397   |
| Sma-1-658 | NS_000200.1    | - | 31477962  | 31477913  |
| Sma-1-659 | NW_003038241.1 | + | 103854    | 103903    |
| Sma-1-660 | NS_000200.1    | + | 314566559 | 314566608 |
| Sma-1-661 | NW_003037808.1 | - | 615902    | 615853    |
| Sma-1-662 | NW_003038083.1 | + | 479087    | 479136    |
| Sma-1-663 | NS_000200.1    | + | 270722424 | 270722473 |
| Sma-1-664 | NS_000200.1    | - | 32402539  | 32402490  |
| Sma-1-665 | NW_003020312.1 | + | 989       | 1038      |
| Sma-1-666 | NS_000200.1    | + | 371397082 | 371397131 |
| Sma-1-667 | NW_003037917.1 | - | 374323    | 374274    |
| Sma-1-668 | NS_000200.1    | - | 165411127 | 165411078 |
| Sma-1-669 | NW_003037827.1 | - | 698322    | 698273    |
| Sma-1-670 | NS_000200.1    | - | 63320463  | 63320414  |
| Sma-1-671 | NW_003038083.1 | - | 757627    | 757578    |
| Sma-1-672 | NS_000200.1    | - | 271000964 | 271000915 |
| Sma-1-673 | NW_003038146.1 | - | 8367      | 8318      |
| Sma-1-674 | NS_000200.1    | - | 288989037 | 288988988 |
| Sma-1-675 | NW_003026460.1 | + | 124160    | 124210    |
| Sma-1-676 | NS_000200.1    | + | 170646366 | 170646416 |
| Sma-1-677 | NW_003037982.1 | - | 1265489   | 1265440   |
| Sma-1-678 | NS_000200.1    | - | 214924684 | 214924635 |
| Sma-1-679 | NW_003037903.1 | - | 953942    | 953893    |
| Sma-1-680 | NS_000200.1    | - | 148508023 | 148507974 |
| Sma-1-681 | NW_003037814.1 | + | 89354     | 89403     |
| Sma-1-682 | NS_000200.1    | + | 43073214  | 43073263  |
| Sma-1-683 | NW_003037824.1 | - | 208699    | 208650    |
| Sma-1-684 | NS_000200.1    | - | 57139639  | 57139590  |
| Sma-1-685 | NW_003037889.1 | - | 349927    | 349878    |
| Sma-1-686 | NS_000200.1    | - | 134126417 | 134126368 |
| Sma-1-687 | NW_003037841.1 | + | 1113939   | 1113988   |
| Sma-1-688 | NS_000200.1    | + | 83725120  | 83725169  |

|           |                |   |           |           |
|-----------|----------------|---|-----------|-----------|
| Sma-1-689 | NW_003037939.1 | + | 383304    | 383353    |
| Sma-1-690 | NS_000200.1    | + | 183253058 | 183253107 |
| Sma-1-691 | NW_003026482.1 | - | 17603     | 17554     |
| Sma-1-692 | NS_000200.1    | - | 255805349 | 255805300 |
| Sma-1-693 | NW_003038015.1 | - | 182316    | 182267    |
| Sma-1-694 | NS_000200.1    | - | 230505806 | 230505757 |
| Sma-1-695 | NW_003037962.1 | + | 475305    | 475354    |
| Sma-1-696 | NS_000200.1    | + | 196552148 | 196552197 |
| Sma-1-697 | NW_003037920.1 | + | 25381     | 25430     |
| Sma-1-698 | NS_000200.1    | + | 169206188 | 169206237 |
| Sma-1-699 | NW_003026462.1 | + | 230811    | 230860    |
| Sma-1-700 | NS_000200.1    | + | 196898314 | 196898363 |
| Sma-1-701 | NW_003037914.1 | - | 596233    | 596184    |
| Sma-1-702 | NS_000200.1    | - | 160740483 | 160740434 |
| Sma-1-703 | NW_003037919.1 | + | 18857     | 18906     |
| Sma-1-704 | NS_000200.1    | + | 168876786 | 168876835 |
| Sma-1-705 | NW_003037797.1 | - | 1381216   | 1381167   |
| Sma-1-706 | NS_000200.1    | - | 11809076  | 11809027  |
| Sma-1-707 | NW_003037904.1 | + | 172858    | 172907    |
| Sma-1-708 | NS_000200.1    | + | 148887357 | 148887406 |
| Sma-1-709 | NW_003038056.1 | + | 161042    | 161091    |
| Sma-1-710 | NS_000200.1    | + | 259138693 | 259138742 |
| Sma-1-711 | NW_003037938.1 | + | 84968     | 85017     |
| Sma-1-712 | NS_000200.1    | + | 182122081 | 182122130 |
| Sma-1-713 | NW_003038252.1 | + | 114690    | 114740    |
| Sma-1-714 | NS_000200.1    | + | 318970278 | 318970328 |
| Sma-1-715 | NW_003037935.1 | + | 875811    | 875861    |
| Sma-1-716 | NS_000200.1    | + | 180292346 | 180292396 |
| Sma-1-717 | NW_003037826.1 | + | 365309    | 365359    |
| Sma-1-718 | NS_000200.1    | + | 61364825  | 61364875  |
| Sma-1-719 | NW_003038028.1 | + | 644752    | 644801    |
| Sma-1-720 | NS_000200.1    | + | 241952326 | 241952375 |
| env-79    | AY167025.1     | - | 16892     | 16847     |
| Sma-1-721 | NW_003037928.1 | + | 285674    | 285723    |
| Sma-1-722 | NS_000200.1    | + | 174609627 | 174609676 |
| Sma-1-723 | NW_003037803.1 | + | 385354    | 385403    |
| Sma-1-724 | NS_000200.1    | + | 23885891  | 23885940  |
| Sma-1-725 | NW_003037995.1 | - | 210050    | 210003    |
| Sma-1-726 | NS_000200.1    | - | 219899818 | 219899771 |
| Sma-1-727 | NW_003038030.1 | + | 667484    | 667532    |
| Sma-1-728 | NS_000200.1    | + | 243803351 | 243803399 |
| Sma-1-729 | NW_003038095.1 | - | 31031     | 30983     |
| Sma-1-730 | NS_000200.1    | - | 274100073 | 274100025 |
| Sma-1-731 | NW_003037827.1 | + | 228036    | 228084    |
| Sma-1-732 | NS_000200.1    | + | 62850177  | 62850225  |
| Sma-1-733 | NW_003038161.1 | + | 393359    | 393407    |
| Sma-1-734 | NS_000200.1    | + | 297763210 | 297763258 |
| Sma-1-735 | NW_003038027.1 | - | 134680    | 134632    |
| Sma-1-736 | NS_000200.1    | - | 240505394 | 240505346 |
| Sma-1-737 | NW_003026618.1 | + | 1790      | 1839      |
| Sma-1-738 | NS_000200.1    | + | 321756792 | 321756841 |
| Sma-1-739 | NW_003037923.1 | + | 96656     | 96704     |

|           |                |   |           |           |
|-----------|----------------|---|-----------|-----------|
| Sma-1-740 | NS_000200.1    | + | 171152869 | 171152917 |
| Sma-1-741 | NW_003037792.1 | - | 246181    | 246133    |
| Sma-1-742 | NS_000200.1    | - | 382683525 | 382683477 |
| Sma-1-743 | NW_003037914.1 | - | 329788    | 329740    |
| Sma-1-744 | NS_000200.1    | - | 160474038 | 160473990 |
| Sma-1-745 | NW_003038541.1 | - | 1231      | 1182      |
| Sma-1-746 | NS_000200.1    | - | 343392080 | 343392031 |
| Sma-1-747 | NW_003037890.1 | - | 1104919   | 1104870   |
| Sma-1-748 | NS_000200.1    | - | 136788280 | 136788231 |
| Sma-1-749 | NW_003038246.1 | + | 173082    | 173131    |
| Sma-1-750 | NS_000200.1    | + | 315814210 | 315814259 |
| Sma-1-751 | NW_003030390.1 | + | 906       | 955       |
| Sma-1-752 | NS_000200.1    | + | 360009513 | 360009562 |
| Sma-1-753 | NW_003038163.1 | - | 634567    | 634518    |
| Sma-1-754 | NS_000200.1    | - | 299034847 | 299034798 |
| Sma-1-755 | NW_003037860.1 | - | 86443     | 86394     |
| Sma-1-756 | NS_000200.1    | - | 103829471 | 103829422 |
| Sma-1-757 | NW_003037909.1 | - | 733336    | 733287    |
| Sma-1-758 | NS_000200.1    | - | 154274985 | 154274936 |
| Sma-1-759 | NW_003038146.1 | - | 323449    | 323400    |
| Sma-1-760 | NS_000200.1    | - | 289304119 | 289304070 |
| Sma-1-761 | NW_003038081.1 | - | 263240    | 263191    |
| Sma-1-762 | NS_000200.1    | - | 269425283 | 269425234 |
| Sma-1-763 | NW_003038147.1 | - | 366843    | 366794    |
| Sma-1-764 | NS_000200.1    | - | 289894586 | 289894537 |
| Sma-1-765 | NW_003037841.1 | + | 1883161   | 1883210   |
| Sma-1-766 | NS_000200.1    | + | 84494342  | 84494391  |
| Sma-1-767 | NW_003037814.1 | - | 2130414   | 2130365   |
| Sma-1-768 | NS_000200.1    | - | 45114274  | 45114225  |
| Sma-1-769 | NW_003038250.1 | + | 187496    | 187545    |
| Sma-1-770 | NS_000200.1    | + | 318240173 | 318240222 |
| Sma-1-771 | NW_003037827.1 | - | 1727419   | 1727370   |
| Sma-1-772 | NS_000200.1    | - | 64349560  | 64349511  |
| Sma-1-773 | NW_003037976.1 | + | 203870    | 203919    |
| Sma-1-774 | NS_000200.1    | + | 206818185 | 206818234 |
| Sma-1-775 | NW_003037860.1 | - | 55782     | 55733     |
| Sma-1-776 | NS_000200.1    | - | 103798810 | 103798761 |
| Sma-1-777 | NW_003037896.1 | + | 476015    | 476064    |
| Sma-1-778 | NS_000200.1    | + | 143396438 | 143396487 |
| Sma-1-779 | NW_003035869.1 | - | 150960    | 150911    |
| Sma-1-780 | NS_000200.1    | - | 335335160 | 335335111 |
| Sma-1-781 | NW_003037834.1 | - | 671901    | 671852    |
| Sma-1-782 | NS_000200.1    | - | 73832387  | 73832338  |
| env-80    | AB231864.1     | - | 117137    | 117092    |
| Sma-1-783 | NW_003037980.1 | - | 295103    | 295058    |
| Sma-1-784 | NS_000200.1    | - | 211255965 | 211255920 |
| Sma-1-785 | NW_003037992.1 | + | 123764    | 123813    |
| Sma-1-786 | NS_000200.1    | + | 217965245 | 217965294 |
| Sma-1-787 | NW_003038124.1 | + | 51512     | 51561     |
| Sma-1-788 | NS_000200.1    | + | 279044156 | 279044205 |
| Sma-1-789 | NW_003037887.1 | + | 374452    | 374501    |
| Sma-1-790 | NS_000200.1    | + | 130838430 | 130838479 |

|           |                |   |           |           |
|-----------|----------------|---|-----------|-----------|
| Sma-1-791 | NW_003037981.1 | - | 340170    | 340121    |
| Sma-1-792 | NS_000200.1    | - | 212738038 | 212737989 |
| Sma-1-793 | NW_003037915.1 | - | 1109105   | 1109056   |
| Sma-1-794 | NS_000200.1    | - | 163009091 | 163009042 |
| Sma-1-795 | NW_003037824.1 | - | 767501    | 767452    |
| Sma-1-796 | NS_000200.1    | - | 57698441  | 57698392  |
| Sma-1-797 | NW_003038033.1 | + | 173736    | 173785    |
| Sma-1-798 | NS_000200.1    | + | 246153738 | 246153787 |
| Sma-1-799 | NW_003037806.1 | + | 1185389   | 1185438   |
| Sma-1-800 | NS_000200.1    | + | 29380603  | 29380652  |
| Sma-1-801 | NW_003037799.1 | - | 1480515   | 1480466   |
| Sma-1-802 | NS_000200.1    | - | 18470869  | 18470820  |
| Sma-1-803 | NW_003037846.1 | + | 723007    | 723056    |
| Sma-1-804 | NS_000200.1    | + | 88357577  | 88357626  |
| Sma-1-805 | NW_003037868.1 | + | 425983    | 426032    |
| Sma-1-806 | NS_000200.1    | + | 116397695 | 116397744 |
| Sma-1-807 | NW_003037911.1 | + | 836086    | 836135    |
| Sma-1-808 | NS_000200.1    | + | 156623439 | 156623488 |
| Sma-1-809 | NW_003037891.1 | - | 653679    | 653630    |
| Sma-1-810 | NS_000200.1    | - | 138534957 | 138534908 |
| Sma-1-811 | NW_003038005.1 | - | 359725    | 359676    |
| Sma-1-812 | NS_000200.1    | - | 224765679 | 224765630 |
| Sma-1-813 | NW_003037793.1 | - | 692365    | 692316    |
| Sma-1-814 | NS_000200.1    | - | 692365    | 692316    |
| Sma-1-815 | NW_003038023.1 | + | 724652    | 724701    |
| Sma-1-816 | NS_000200.1    | + | 237884943 | 237884992 |
| Sma-1-817 | NW_003039130.1 | - | 105886    | 105837    |
| Sma-1-818 | NS_000200.1    | - | 317780497 | 317780448 |
| Sma-1-819 | NW_003020984.1 | + | 506       | 555       |
| Sma-1-820 | NS_000200.1    | + | 367729338 | 367729387 |
| Sma-1-821 | NW_003038023.1 | + | 714692    | 714741    |
| Sma-1-822 | NS_000200.1    | + | 237874983 | 237875032 |
| Sma-1-823 | NW_003037814.1 | - | 1783694   | 1783645   |
| Sma-1-824 | NS_000200.1    | - | 44767554  | 44767505  |
| Sma-1-825 | NW_003037915.1 | - | 1204936   | 1204887   |
| Sma-1-826 | NS_000200.1    | - | 163104922 | 163104873 |
| Sma-1-827 | NW_003037839.1 | + | 401556    | 401605    |
| Sma-1-828 | NS_000200.1    | + | 79359706  | 79359755  |
| Sma-1-829 | NW_003037891.1 | - | 480129    | 480080    |
| Sma-1-830 | NS_000200.1    | - | 138361407 | 138361358 |
| Sma-1-831 | NW_003038261.1 | + | 769098    | 769147    |
| Sma-1-832 | NS_000200.1    | + | 324382749 | 324382798 |
| Sma-1-833 | NW_003026472.1 | + | 172306    | 172355    |
| Sma-1-834 | NS_000200.1    | + | 236584298 | 236584347 |
| Sma-1-835 | NW_003037884.1 | + | 968569    | 968618    |
| Sma-1-836 | NS_000200.1    | + | 127748234 | 127748283 |
| Sma-1-837 | NW_003037819.1 | - | 1140460   | 1140411   |
| Sma-1-838 | NS_000200.1    | - | 52228725  | 52228676  |
| Sma-1-839 | NW_003037859.1 | + | 369558    | 369608    |
| Sma-1-840 | NS_000200.1    | + | 103048399 | 103048449 |
| Sma-1-841 | NW_003038002.1 | - | 146929    | 146880    |
| Sma-1-842 | NS_000200.1    | - | 223267138 | 223267089 |

|           |                |   |           |           |
|-----------|----------------|---|-----------|-----------|
| Sma-1-843 | NW_003037787.1 | + | 192459    | 192508    |
| Sma-1-844 | NS_000200.1    | + | 380440628 | 380440677 |
| Sma-1-845 | NW_003037873.1 | + | 676403    | 676452    |
| Sma-1-846 | NS_000200.1    | + | 119415531 | 119415580 |
| Sma-1-847 | NW_003038001.1 | + | 376911    | 376960    |
| Sma-1-848 | NS_000200.1    | + | 223086472 | 223086521 |
| Sma-1-849 | NW_003038086.1 | + | 433581    | 433630    |
| Sma-1-850 | NS_000200.1    | + | 272682174 | 272682223 |
| Sma-1-851 | NW_003026607.1 | + | 145142    | 145191    |
| Sma-1-852 | NS_000200.1    | + | 308177527 | 308177576 |
| Sma-1-853 | NW_003038132.1 | + | 435081    | 435130    |
| Sma-1-854 | NS_000200.1    | + | 282855551 | 282855600 |
| Sma-1-855 | NW_003038196.1 | + | 48855     | 48904     |
| Sma-1-856 | NS_000200.1    | + | 303191138 | 303191187 |
| Sma-1-857 | NW_003038023.1 | - | 571731    | 571682    |
| Sma-1-858 | NS_000200.1    | - | 237732022 | 237731973 |
| Sma-1-859 | NW_003023030.1 | + | 3232      | 3281      |
| Sma-1-860 | NS_000200.1    | + | 372111452 | 372111501 |
| Sma-1-861 | NW_003038037.1 | - | 436580    | 436531    |
| Sma-1-862 | NS_000200.1    | - | 250591989 | 250591940 |
| Sma-1-863 | NW_003037977.1 | - | 339163    | 339114    |
| Sma-1-864 | NS_000200.1    | - | 208625183 | 208625134 |
| Sma-1-865 | NW_003037798.1 | - | 1316742   | 1316693   |
| Sma-1-866 | NS_000200.1    | - | 15575900  | 15575851  |
| Sma-1-867 | NW_003037884.1 | + | 1302266   | 1302315   |
| Sma-1-868 | NS_000200.1    | + | 128081931 | 128081980 |
| Sma-1-869 | NW_003038471.1 | - | 7877      | 7828      |
| Sma-1-870 | NS_000200.1    | - | 331848791 | 331848742 |
| Sma-1-871 | NW_003026458.1 | - | 278638    | 278589    |
| Sma-1-872 | NS_000200.1    | - | 102146868 | 102146819 |
| Sma-1-873 | NW_003037829.1 | - | 865507    | 865458    |
| Sma-1-874 | NS_000200.1    | - | 66766045  | 66765996  |
| Sma-1-875 | NW_003038094.1 | + | 23598     | 23647     |
| Sma-1-876 | NS_000200.1    | + | 274066912 | 274066961 |
| Sma-1-877 | NW_003037849.1 | - | 315767    | 315718    |
| Sma-1-878 | NS_000200.1    | - | 91292040  | 91291991  |
| Sma-1-879 | NW_003038229.1 | + | 40664     | 40713     |
| Sma-1-880 | NS_000200.1    | + | 311157886 | 311157935 |
| Sma-1-881 | NW_003037810.1 | - | 361470    | 361421    |
| Sma-1-882 | NS_000200.1    | - | 36965992  | 36965943  |
| Sma-1-883 | NW_003037831.1 | + | 1127260   | 1127309   |
| Sma-1-884 | NS_000200.1    | + | 70576562  | 70576611  |
| Sma-1-885 | NW_003026466.1 | - | 54368     | 54319     |
| Sma-1-886 | NS_000200.1    | - | 215321475 | 215321426 |
| Sma-1-887 | NW_003038161.1 | + | 181712    | 181761    |
| Sma-1-888 | NS_000200.1    | + | 297551563 | 297551612 |
| Sma-1-889 | NW_003037901.1 | - | 652283    | 652234    |
| Sma-1-890 | NS_000200.1    | - | 146500744 | 146500695 |
| Sma-1-891 | NW_003037890.1 | - | 378670    | 378621    |
| Sma-1-892 | NS_000200.1    | - | 136062031 | 136061982 |
| Sma-1-893 | NW_003038131.1 | - | 332170    | 332121    |
| Sma-1-894 | NS_000200.1    | - | 282294014 | 282293965 |

|           |                |   |           |           |
|-----------|----------------|---|-----------|-----------|
| Sma-1-895 | NW_003026514.1 | - | 112222    | 112173    |
| Sma-1-896 | NS_000200.1    | - | 288570909 | 288570860 |
| Sma-1-897 | NW_003037880.1 | + | 453315    | 453364    |
| Sma-1-898 | NS_000200.1    | + | 124136873 | 124136922 |
| Sma-1-899 | NW_003037827.1 | - | 2264732   | 2264683   |
| Sma-1-900 | NS_000200.1    | - | 64886873  | 64886824  |
| Sma-1-901 | NW_003037901.1 | - | 784013    | 783964    |
| Sma-1-902 | NS_000200.1    | - | 146632474 | 146632425 |
| Sma-1-903 | NW_003037888.1 | - | 780475    | 780426    |
| Sma-1-904 | NS_000200.1    | - | 132988967 | 132988918 |
| Sma-1-905 | NW_003037831.1 | + | 1533673   | 1533722   |
| Sma-1-906 | NS_000200.1    | + | 70982975  | 70983024  |
| Sma-1-907 | NW_003037916.1 | + | 1634486   | 1634535   |
| Sma-1-908 | NS_000200.1    | + | 164827897 | 164827946 |
| Sma-1-909 | NW_003037930.1 | - | 149774    | 149725    |
| Sma-1-910 | NS_000200.1    | - | 176007738 | 176007689 |
| Sma-1-911 | NW_003037831.1 | - | 1681192   | 1681143   |
| Sma-1-912 | NS_000200.1    | - | 71130494  | 71130445  |
| Sma-1-913 | NW_003037810.1 | - | 338398    | 338349    |
| Sma-1-914 | NS_000200.1    | - | 36942920  | 36942871  |
| Sma-1-915 | NW_003037798.1 | - | 1890980   | 1890931   |
| Sma-1-916 | NS_000200.1    | - | 16150138  | 16150089  |
| Sma-1-917 | NW_003037795.1 | + | 1575490   | 1575539   |
| Sma-1-918 | NS_000200.1    | + | 7966373   | 7966422   |
| Sma-1-919 | NW_003037788.1 | - | 172199    | 172150    |
| Sma-1-920 | NS_000200.1    | - | 380619437 | 380619388 |
| Sma-1-921 | NW_003037851.1 | - | 382933    | 382884    |
| Sma-1-922 | NS_000200.1    | - | 93786243  | 93786194  |
| Sma-1-923 | NW_003026456.1 | + | 553931    | 553980    |
| Sma-1-924 | NS_000200.1    | + | 58477067  | 58477116  |
| Sma-1-925 | NW_003037988.1 | + | 163393    | 163443    |
| Sma-1-926 | NS_000200.1    | + | 216157211 | 216157261 |
| Sma-1-927 | NW_003026515.1 | + | 289418    | 289467    |
| Sma-1-928 | NS_000200.1    | + | 290933829 | 290933878 |
| Sma-1-929 | NW_003038115.1 | - | 110616    | 110567    |
| Sma-1-930 | NS_000200.1    | - | 277165911 | 277165862 |
| Sma-1-931 | NW_003026616.1 | + | 314488    | 314537    |
| Sma-1-932 | NS_000200.1    | + | 317671087 | 317671136 |
| Sma-1-933 | NW_003026458.1 | - | 377559    | 377510    |
| Sma-1-934 | NS_000200.1    | - | 102245789 | 102245740 |
| Sma-1-935 | NW_003037834.1 | - | 155402    | 155350    |
| Sma-1-936 | NS_000200.1    | - | 73315888  | 73315836  |
| Sma-1-937 | NW_003037923.1 | + | 114176    | 114225    |
| Sma-1-938 | NS_000200.1    | + | 171170389 | 171170438 |
| Sma-1-939 | NW_003037801.1 | - | 483979    | 483930    |
| Sma-1-940 | NS_000200.1    | - | 21573459  | 21573410  |
| Sma-1-941 | NW_003026464.1 | + | 342279    | 342328    |
| Sma-1-942 | NS_000200.1    | + | 203642588 | 203642637 |
| Sma-1-943 | NW_003026608.1 | + | 52354     | 52403     |
| Sma-1-944 | NS_000200.1    | + | 309330474 | 309330523 |
| Sma-1-945 | NW_003037933.1 | - | 140143    | 140093    |
| Sma-1-946 | NS_000200.1    | - | 178553315 | 178553265 |



|           |                |   |           |           |
|-----------|----------------|---|-----------|-----------|
| Sma-1-947 | NW_003037814.1 | - | 999248    | 999199    |
| Sma-1-948 | NS_000200.1    | - | 43983108  | 43983059  |
| Sma-1-949 | NW_003037807.1 | + | 94897     | 94946     |
| Sma-1-950 | NS_000200.1    | + | 30356413  | 30356462  |
| Sma-1-951 | NW_003037793.1 | + | 3672925   | 3672973   |
| Sma-1-952 | NS_000200.1    | + | 3672925   | 3672973   |
| Sma-1-953 | NW_003037851.1 | - | 750733    | 750685    |
| Sma-1-954 | NS_000200.1    | - | 94154043  | 94153995  |
| Sma-1-955 | NW_003037797.1 | + | 2065268   | 2065317   |
| Sma-1-956 | NS_000200.1    | + | 12493128  | 12493177  |
| Sma-1-957 | NW_003037909.1 | + | 571470    | 571518    |
| Sma-1-958 | NS_000200.1    | + | 154113119 | 154113167 |
| Sma-1-959 | NW_003030366.1 | + | 575       | 623       |
| Sma-1-960 | NS_000200.1    | + | 362776720 | 362776768 |
| Sma-1-961 | NW_003038247.1 | + | 346889    | 346937    |
| Sma-1-962 | NS_000200.1    | + | 316295617 | 316295665 |
| Sma-1-963 | NW_003037840.1 | - | 1724147   | 1724098   |
| Sma-1-964 | NS_000200.1    | - | 82347471  | 82347422  |
| Sma-1-965 | NW_003037838.1 | + | 874480    | 874529    |
| Sma-1-966 | NS_000200.1    | + | 78873043  | 78873092  |
| Sma-1-967 | NW_003037901.1 | + | 378921    | 378969    |
| Sma-1-968 | NS_000200.1    | + | 146227382 | 146227430 |
| Sma-1-969 | NW_003037901.1 | + | 521120    | 521168    |
| Sma-1-970 | NS_000200.1    | + | 146369581 | 146369629 |
| Sma-1-971 | NW_003026456.1 | + | 150182    | 150230    |
| Sma-1-972 | NS_000200.1    | + | 58073318  | 58073366  |
| Sma-1-973 | NW_003037834.1 | + | 947163    | 947211    |
| Sma-1-974 | NS_000200.1    | + | 74107649  | 74107697  |
| Sma-1-975 | NW_003037982.1 | - | 951467    | 951419    |
| Sma-1-976 | NS_000200.1    | - | 214610662 | 214610614 |
| Sma-1-977 | NW_003026462.1 | - | 470155    | 470107    |
| Sma-1-978 | NS_000200.1    | - | 197137658 | 197137610 |
| Sma-1-979 | NW_003026459.1 | + | 234852    | 234901    |
| Sma-1-980 | NS_000200.1    | + | 141880125 | 141880174 |
| Sma-1-981 | NW_003037981.1 | - | 215031    | 214982    |
| Sma-1-982 | NS_000200.1    | - | 212612899 | 212612850 |
| Sma-1-983 | NW_003026456.1 | - | 56186     | 56137     |
| Sma-1-984 | NS_000200.1    | - | 57979322  | 57979273  |
| Sma-1-985 | NW_003037905.1 | + | 187901    | 187950    |
| Sma-1-986 | NS_000200.1    | + | 149456913 | 149456962 |
| Sma-1-987 | NW_003037980.1 | + | 1302643   | 1302692   |
| Sma-1-988 | NS_000200.1    | + | 212263505 | 212263554 |
| Sma-1-989 | NW_003025206.1 | + | 1541      | 1590      |
| Sma-1-990 | NS_000200.1    | + | 361395509 | 361395558 |
| Sma-1-991 | NW_003037836.1 | - | 273691    | 273642    |
| Sma-1-992 | NS_000200.1    | - | 75830790  | 75830741  |
| Sma-1-993 | NW_003025176.1 | - | 1324      | 1275      |
| Sma-1-994 | NW_003038015.1 | + | 713200    | 713249    |
| Sma-1-995 | NS_000200.1    | + | 231036690 | 231036739 |
| Sma-1-996 | NS_000200.1    | - | 361334941 | 361334892 |
| Sma-1-997 | NW_003037901.1 | + | 592169    | 592218    |
| Sma-1-998 | NS_000200.1    | + | 146440630 | 146440679 |

|            |                |   |           |           |
|------------|----------------|---|-----------|-----------|
| Sma-1-999  | NW_003026469.1 | - | 205970    | 205921    |
| Sma-1-1000 | NS_000200.1    | - | 217827629 | 217827580 |
| Sma-1-1001 | NW_003037997.1 | + | 413357    | 413407    |
| Sma-1-1002 | NS_000200.1    | + | 221224799 | 221224849 |
| Sma-1-1003 | NW_003026470.1 | - | 492387    | 492338    |
| Sma-1-1004 | NS_000200.1    | - | 219616356 | 219616307 |
| Sma-1-1005 | NW_003037830.1 | + | 624040    | 624089    |
| Sma-1-1006 | NS_000200.1    | + | 68514411  | 68514460  |
| Sma-1-1007 | NW_003026484.1 | + | 74421     | 74470     |
| Sma-1-1008 | NS_000200.1    | + | 257037112 | 257037161 |
| Sma-1-1009 | NW_003037804.1 | - | 930368    | 930319    |
| Sma-1-1010 | NS_000200.1    | - | 26070388  | 26070339  |
| Sma-1-1011 | NW_003037841.1 | + | 500341    | 500390    |
| Sma-1-1012 | NS_000200.1    | + | 83111522  | 83111571  |
| Sma-1-1013 | NW_003037895.1 | - | 263173    | 263124    |
| Sma-1-1014 | NS_000200.1    | - | 142709375 | 142709326 |
| Sma-1-1015 | NW_003037844.1 | + | 415942    | 415991    |
| Sma-1-1016 | NS_000200.1    | + | 86599388  | 86599437  |
| Sma-1-1017 | NW_003026504.1 | - | 85760     | 85711     |
| Sma-1-1018 | NS_000200.1    | - | 277002526 | 277002477 |
| Sma-1-1019 | NW_003037829.1 | - | 1731785   | 1731736   |
| Sma-1-1020 | NS_000200.1    | - | 67632323  | 67632274  |
| Sma-1-1021 | NW_003037977.1 | + | 487557    | 487606    |
| Sma-1-1022 | NS_000200.1    | + | 208773577 | 208773626 |
| Sma-1-1023 | NW_003037891.1 | + | 931978    | 932027    |
| Sma-1-1024 | NS_000200.1    | + | 138813256 | 138813305 |
| Sma-1-1025 | NW_003037848.1 | + | 931306    | 931355    |
| Sma-1-1026 | NS_000200.1    | + | 90624377  | 90624426  |
| Sma-1-1027 | NW_003037928.1 | + | 152379    | 152428    |
| Sma-1-1028 | NS_000200.1    | + | 174476332 | 174476381 |
| Sma-1-1029 | NW_003037961.1 | + | 353436    | 353485    |
| Sma-1-1030 | NS_000200.1    | + | 195977678 | 195977727 |
| Sma-1-1031 | NW_003037891.1 | + | 1245677   | 1245726   |
| Sma-1-1032 | NS_000200.1    | + | 139126955 | 139127004 |
| Sma-1-1033 | NW_003037814.1 | - | 192634    | 192585    |
| Sma-1-1034 | NS_000200.1    | - | 43176494  | 43176445  |
| Sma-1-1035 | NW_003037794.1 | + | 687533    | 687582    |
| Sma-1-1036 | NS_000200.1    | + | 4867128   | 4867177   |
| Sma-1-1037 | NW_003037918.1 | - | 561420    | 561371    |
| Sma-1-1038 | NS_000200.1    | - | 167128410 | 167128361 |
| Sma-1-1039 | NW_003038130.1 | + | 106642    | 106691    |
| Sma-1-1040 | NS_000200.1    | + | 281661628 | 281661677 |
| Sma-1-1041 | NW_003037912.1 | + | 1723749   | 1723798   |
| Sma-1-1042 | NS_000200.1    | + | 158535324 | 158535373 |
| Sma-1-1043 | NW_003037818.1 | - | 1412574   | 1412525   |
| Sma-1-1044 | NS_000200.1    | - | 50127981  | 50127932  |
| Sma-1-1045 | NW_003038070.1 | + | 696       | 745       |
| Sma-1-1046 | NS_000200.1    | + | 264337937 | 264337986 |
| Sma-1-1047 | NW_003037852.1 | + | 1062494   | 1062543   |
| Sma-1-1048 | NS_000200.1    | + | 95454389  | 95454438  |
| Sma-1-1049 | NW_003037827.1 | - | 442783    | 442734    |
| Sma-1-1050 | NS_000200.1    | - | 63064924  | 63064875  |

|            |                |   |           |           |
|------------|----------------|---|-----------|-----------|
| Sma-1-1051 | NW_003026577.1 | + | 15448     | 15497     |
| Sma-1-1052 | NS_000200.1    | + | 302686704 | 302686753 |
| Sma-1-1053 | NW_003037918.1 | + | 1043824   | 1043873   |
| Sma-1-1054 | NS_000200.1    | + | 167610814 | 167610863 |
| Sma-1-1055 | NW_003022920.1 | - | 559       | 510       |
| Sma-1-1056 | NS_000200.1    | - | 371883353 | 371883304 |
| Sma-1-1057 | NW_003033045.1 | - | 463       | 414       |
| Sma-1-1058 | NS_000200.1    | - | 326267351 | 326267302 |
| Sma-1-1059 | NW_003038023.1 | - | 566131    | 566082    |
| Sma-1-1060 | NS_000200.1    | - | 237726422 | 237726373 |
| Sma-1-1061 | NW_003037853.1 | + | 316625    | 316674    |
| Sma-1-1062 | NS_000200.1    | + | 95808676  | 95808725  |
| Sma-1-1063 | NW_003038014.1 | - | 223606    | 223557    |
| Sma-1-1064 | NS_000200.1    | - | 229964295 | 229964246 |
| Sma-1-1065 | NW_003026599.1 | + | 7012      | 7061      |
| Sma-1-1066 | NS_000200.1    | + | 305885341 | 305885390 |
| Sma-1-1067 | NW_003026605.1 | - | 12928     | 12879     |
| Sma-1-1068 | NS_000200.1    | - | 307691792 | 307691743 |
| Sma-1-1069 | NW_003037889.1 | - | 878970    | 878921    |
| Sma-1-1070 | NS_000200.1    | - | 134655460 | 134655411 |
| Sma-1-1071 | NW_003037908.1 | + | 263402    | 263451    |
| Sma-1-1072 | NW_003037908.1 | - | 264036    | 263987    |
| Sma-1-1073 | NS_000200.1    | + | 152736533 | 152736582 |
| Sma-1-1074 | NS_000200.1    | - | 152737167 | 152737118 |
| Sma-1-1075 | NW_003026611.1 | + | 126887    | 126936    |
| Sma-1-1076 | NS_000200.1    | + | 310696671 | 310696720 |
| Sma-1-1077 | NW_003037972.1 | - | 484572    | 484523    |
| Sma-1-1078 | NS_000200.1    | - | 202960276 | 202960227 |
| Sma-1-1079 | NW_003037795.1 | - | 1486300   | 1486251   |
| Sma-1-1080 | NS_000200.1    | - | 7877183   | 7877134   |
| Sma-1-1081 | NW_003037826.1 | + | 1350034   | 1350083   |
| Sma-1-1082 | NS_000200.1    | + | 62349550  | 62349599  |
| Sma-1-1083 | NW_003026616.1 | + | 140375    | 140424    |
| Sma-1-1084 | NS_000200.1    | + | 317496974 | 317497023 |
| Sma-1-1085 | NW_003038019.1 | - | 253653    | 253604    |
| Sma-1-1086 | NS_000200.1    | - | 233570471 | 233570422 |
| Sma-1-1087 | NW_003035689.1 | - | 10530     | 10481     |
| Sma-1-1088 | NS_000200.1    | - | 333095746 | 333095697 |
| Sma-1-1089 | NW_003038022.1 | - | 320209    | 320160    |
| Sma-1-1090 | NS_000200.1    | - | 236001051 | 236001002 |
| Sma-1-1091 | NW_003037971.1 | - | 639433    | 639384    |
| Sma-1-1092 | NS_000200.1    | - | 202261483 | 202261434 |
| Sma-1-1093 | NW_003037908.1 | + | 995446    | 995495    |
| Sma-1-1094 | NS_000200.1    | + | 153468577 | 153468626 |
| Sma-1-1095 | NW_003038070.1 | + | 133989    | 134038    |
| Sma-1-1096 | NS_000200.1    | + | 264471230 | 264471279 |
| Sma-1-1097 | NW_003026618.1 | - | 242417    | 242368    |
| Sma-1-1098 | NS_000200.1    | - | 321997419 | 321997370 |
| Sma-1-1099 | NW_003037825.1 | + | 80033     | 80082     |
| Sma-1-1100 | NS_000200.1    | + | 59209815  | 59209864  |
| Sma-1-1101 | NW_003037970.1 | + | 396607    | 396656    |
| Sma-1-1102 | NS_000200.1    | + | 201452797 | 201452846 |

|            |                |   |           |           |
|------------|----------------|---|-----------|-----------|
| Sma-1-1103 | NW_003039127.1 | - | 2304473   | 2304424   |
| Sma-1-1104 | NS_000200.1    | - | 115381972 | 115381923 |
| Sma-1-1105 | NW_003026458.1 | + | 514192    | 514241    |
| Sma-1-1106 | NW_003026458.1 | - | 515765    | 515716    |
| Sma-1-1107 | NS_000200.1    | + | 102382422 | 102382471 |
| Sma-1-1108 | NS_000200.1    | - | 102383995 | 102383946 |
| Sma-1-1109 | NW_003026637.1 | - | 2923      | 2874      |
| Sma-1-1110 | NS_000200.1    | - | 325043959 | 325043910 |
| Sma-1-1111 | NW_003037969.1 | + | 257242    | 257291    |
| Sma-1-1112 | NW_003026484.1 | + | 10941     | 10990     |
| Sma-1-1113 | NS_000200.1    | + | 200863369 | 200863418 |
| Sma-1-1114 | NS_000200.1    | + | 256973632 | 256973681 |
| Sma-1-1115 | NW_003027763.1 | - | 892       | 843       |
| Sma-1-1116 | NS_000200.1    | - | 365898106 | 365898057 |
| Sma-1-1117 | NW_003037797.1 | - | 1990223   | 1990174   |
| Sma-1-1118 | NS_000200.1    | - | 12418083  | 12418034  |
| Sma-1-1119 | NW_003038139.1 | + | 9465      | 9514      |
| Sma-1-1120 | NS_000200.1    | + | 286049595 | 286049644 |
| Sma-1-1121 | NW_003037915.1 | - | 108059    | 108010    |
| Sma-1-1122 | NS_000200.1    | - | 162008045 | 162007996 |
| Sma-1-1123 | NW_003037825.1 | + | 1374253   | 1374302   |
| Sma-1-1124 | NS_000200.1    | + | 60504035  | 60504084  |
| Sma-1-1125 | NW_003038072.1 | - | 320697    | 320648    |
| Sma-1-1126 | NS_000200.1    | - | 265482925 | 265482876 |
| Sma-1-1127 | NW_003037825.1 | + | 1338856   | 1338905   |
| Sma-1-1128 | NS_000200.1    | + | 60468638  | 60468687  |
| Sma-1-1129 | NW_003038142.1 | - | 4051      | 4002      |
| Sma-1-1130 | NS_000200.1    | - | 287214487 | 287214438 |
| Sma-1-1131 | NW_003038024.1 | + | 782487    | 782536    |
| Sma-1-1132 | NS_000200.1    | + | 238679516 | 238679565 |
| Sma-1-1133 | NW_003037965.1 | - | 217293    | 217244    |
| Sma-1-1134 | NS_000200.1    | - | 198506378 | 198506329 |
| Sma-1-1135 | NW_003038025.1 | - | 107085    | 107036    |
| Sma-1-1136 | NS_000200.1    | - | 238965330 | 238965281 |
| Sma-1-1137 | NW_003037964.1 | - | 571963    | 571914    |
| Sma-1-1138 | NS_000200.1    | - | 198173485 | 198173436 |
| Sma-1-1139 | NW_003038025.1 | - | 285052    | 285003    |
| Sma-1-1140 | NW_003038246.1 | + | 226185    | 226234    |
| Sma-1-1141 | NS_000200.1    | + | 315867313 | 315867362 |
| Sma-1-1142 | NS_000200.1    | - | 239143297 | 239143248 |
| Sma-1-1143 | NW_003037926.1 | + | 287394    | 287443    |
| Sma-1-1144 | NW_003037926.1 | - | 288315    | 288266    |
| Sma-1-1145 | NS_000200.1    | + | 173455664 | 173455713 |
| Sma-1-1146 | NS_000200.1    | - | 173456585 | 173456536 |
| Sma-1-1147 | NW_003038240.1 | + | 113984    | 114033    |
| Sma-1-1148 | NS_000200.1    | + | 314252915 | 314252964 |
| Sma-1-1149 | NW_003037860.1 | + | 317949    | 317998    |
| Sma-1-1150 | NS_000200.1    | + | 104060977 | 104061026 |
| Sma-1-1151 | NW_003038145.1 | + | 7233      | 7282      |
| Sma-1-1152 | NS_000200.1    | + | 288618656 | 288618705 |
| Sma-1-1153 | NW_003038244.1 | - | 131181    | 131132    |
| Sma-1-1154 | NS_000200.1    | - | 315276386 | 315276337 |

|            |                |   |           |           |
|------------|----------------|---|-----------|-----------|
| Sma-1-1155 | NW_003038026.1 | - | 676430    | 676381    |
| Sma-1-1156 | NS_000200.1    | - | 240184191 | 240184142 |
| Sma-1-1157 | NW_003038053.1 | + | 228964    | 229013    |
| Sma-1-1158 | NS_000200.1    | + | 257589059 | 257589108 |
| Sma-1-1159 | NW_003037962.1 | + | 478486    | 478536    |
| Sma-1-1160 | NS_000200.1    | + | 196555329 | 196555379 |
| Sma-1-1161 | NW_003038027.1 | - | 320813    | 320764    |
| Sma-1-1162 | NS_000200.1    | - | 240691527 | 240691478 |
| Sma-1-1163 | NW_003038027.1 | - | 39195     | 39146     |
| Sma-1-1164 | NS_000200.1    | - | 240409909 | 240409860 |
| Sma-1-1165 | NW_003037860.1 | - | 798314    | 798265    |
| Sma-1-1166 | NS_000200.1    | - | 104541342 | 104541293 |
| Sma-1-1167 | NW_003037937.1 | + | 566334    | 566383    |
| Sma-1-1168 | NS_000200.1    | + | 181766243 | 181766292 |
| Sma-1-1169 | NW_003031050.1 | - | 1163      | 1114      |
| Sma-1-1170 | NS_000200.1    | - | 325601478 | 325601429 |
| Sma-1-1171 | NW_003038028.1 | + | 544752    | 544801    |
| Sma-1-1172 | NS_000200.1    | + | 241852326 | 241852375 |
| Sma-1-1173 | NW_003037962.1 | - | 25133     | 25084     |
| Sma-1-1174 | NS_000200.1    | - | 196101976 | 196101927 |
| Sma-1-1175 | NW_003037797.1 | + | 295487    | 295536    |
| Sma-1-1176 | NS_000200.1    | + | 10723347  | 10723396  |
| Sma-1-1177 | NW_003037862.1 | - | 829554    | 829505    |
| Sma-1-1178 | NS_000200.1    | - | 106481215 | 106481166 |
| Sma-1-1179 | NW_003037863.1 | - | 1093526   | 1093477   |
| Sma-1-1180 | NS_000200.1    | - | 107851893 | 107851844 |
| Sma-1-1181 | NW_003039127.1 | + | 530675    | 530724    |
| Sma-1-1182 | NS_000200.1    | + | 113608174 | 113608223 |
| Sma-1-1183 | NW_003037911.1 | + | 772510    | 772559    |
| Sma-1-1184 | NS_000200.1    | + | 156559863 | 156559912 |
| Sma-1-1185 | NW_003038238.1 | + | 102163    | 102212    |
| Sma-1-1186 | NS_000200.1    | + | 313708944 | 313708993 |
| Sma-1-1187 | NW_003038030.1 | + | 384815    | 384864    |
| Sma-1-1188 | NS_000200.1    | + | 243520682 | 243520731 |
| Sma-1-1189 | NW_003037812.1 | + | 930065    | 930114    |
| Sma-1-1190 | NS_000200.1    | + | 40412804  | 40412853  |
| Sma-1-1191 | NW_003038030.1 | + | 640622    | 640671    |
| Sma-1-1192 | NS_000200.1    | + | 243776489 | 243776538 |
| Sma-1-1193 | NW_003038253.1 | + | 213757    | 213806    |
| Sma-1-1194 | NS_000200.1    | + | 319531554 | 319531603 |
| Sma-1-1195 | NW_003037953.1 | - | 252464    | 252414    |
| Sma-1-1196 | NS_000200.1    | - | 193165515 | 193165465 |
| Sma-1-1197 | NW_003037822.1 | - | 1495518   | 1495469   |
| Sma-1-1198 | NS_000200.1    | - | 55803524  | 55803475  |
| Sma-1-1199 | NW_003037886.1 | + | 452737    | 452786    |
| Sma-1-1200 | NS_000200.1    | + | 129708304 | 129708353 |
| Sma-1-1201 | NW_003033835.1 | + | 5493      | 5542      |
| Sma-1-1202 | NS_000200.1    | + | 359231235 | 359231284 |
| Sma-1-1203 | NW_003038151.1 | - | 221067    | 221018    |
| Sma-1-1204 | NS_000200.1    | - | 292128310 | 292128261 |
| Sma-1-1205 | NW_003038151.1 | - | 226810    | 226761    |
| Sma-1-1206 | NS_000200.1    | - | 292134053 | 292134004 |

|            |                |   |           |           |
|------------|----------------|---|-----------|-----------|
| Sma-1-1207 | NW_003037794.1 | + | 1814090   | 1814139   |
| Sma-1-1208 | NS_000200.1    | + | 5993685   | 5993734   |
| Sma-1-1209 | NW_003038151.1 | - | 609280    | 609231    |
| Sma-1-1210 | NS_000200.1    | - | 292516523 | 292516474 |
| Sma-1-1211 | NW_003034096.1 | + | 69        | 118       |
| Sma-1-1212 | NS_000200.1    | + | 363729277 | 363729326 |
| Sma-1-1213 | NW_003037811.1 | + | 97742     | 97791     |
| Sma-1-1214 | NS_000200.1    | + | 38267984  | 38268033  |
| Sma-1-1215 | NW_003034560.1 | + | 4296      | 4345      |
| Sma-1-1216 | NW_003037818.1 | + | 149565    | 149614    |
| Sma-1-1217 | NS_000200.1    | + | 48864972  | 48865021  |
| Sma-1-1218 | NS_000200.1    | + | 327581754 | 327581803 |
| Sma-1-1219 | NW_003037821.1 | + | 329184    | 329233    |
| Sma-1-1220 | NS_000200.1    | + | 53473668  | 53473717  |
| Sma-1-1221 | NW_003037821.1 | - | 1120230   | 1120181   |
| Sma-1-1222 | NS_000200.1    | - | 54264714  | 54264665  |
| Sma-1-1223 | NW_003037946.1 | - | 483376    | 483327    |
| Sma-1-1224 | NS_000200.1    | - | 191177236 | 191177187 |
| Sma-1-1225 | NW_003039129.1 | + | 182272    | 182321    |
| Sma-1-1226 | NW_003039129.1 | + | 193918    | 193967    |
| Sma-1-1227 | NS_000200.1    | + | 229137080 | 229137129 |
| Sma-1-1228 | NS_000200.1    | + | 229148726 | 229148775 |
| Sma-1-1229 | NW_003038518.1 | + | 482171    | 482220    |
| Sma-1-1230 | NS_000200.1    | + | 342119004 | 342119053 |
| Sma-1-1231 | NW_003035641.1 | + | 18274     | 18323     |
| Sma-1-1232 | NS_000200.1    | + | 330255652 | 330255701 |
| Sma-1-1233 | NW_003037869.1 | - | 110342    | 110293    |
| Sma-1-1234 | NS_000200.1    | - | 116582687 | 116582638 |
| Sma-1-1235 | NW_003035869.1 | - | 165614    | 165565    |
| Sma-1-1236 | NS_000200.1    | - | 335349814 | 335349765 |
| Sma-1-1237 | NW_003037819.1 | - | 521153    | 521104    |
| Sma-1-1238 | NS_000200.1    | - | 51609418  | 51609369  |
| Sma-1-1239 | NW_003035876.1 | + | 135126    | 135175    |
| Sma-1-1240 | NS_000200.1    | + | 336966626 | 336966675 |
| Sma-1-1241 | NW_003037912.1 | - | 321586    | 321537    |
| Sma-1-1242 | NS_000200.1    | - | 157133161 | 157133112 |
| Sma-1-1243 | NW_003038035.1 | - | 163451    | 163402    |
| Sma-1-1244 | NS_000200.1    | - | 248024943 | 248024894 |
| Sma-1-1245 | NW_003037807.1 | - | 593337    | 593288    |
| Sma-1-1246 | NS_000200.1    | - | 30854853  | 30854804  |
| Sma-1-1247 | NW_003035880.1 | + | 256431    | 256480    |
| Sma-1-1248 | NS_000200.1    | + | 339497495 | 339497544 |
| Sma-1-1249 | NW_003038369.1 | + | 7932      | 7981      |
| Sma-1-1250 | NS_000200.1    | + | 327116871 | 327116920 |
| Sma-1-1251 | NW_003037796.1 | - | 1892092   | 1892043   |
| Sma-1-1252 | NS_000200.1    | - | 10101736  | 10101687  |
| Sma-1-1253 | NW_003037874.1 | - | 312460    | 312411    |
| Sma-1-1254 | NS_000200.1    | - | 119737410 | 119737361 |
| Sma-1-1255 | NW_003037912.1 | + | 489525    | 489574    |
| Sma-1-1256 | NS_000200.1    | + | 157301100 | 157301149 |
| Sma-1-1257 | NW_003038104.1 | + | 34395     | 34444     |
| Sma-1-1258 | NS_000200.1    | + | 274930411 | 274930460 |

|            |                |   |           |           |
|------------|----------------|---|-----------|-----------|
| Sma-1-1259 | NW_003037880.1 | - | 638752    | 638703    |
| Sma-1-1260 | NS_000200.1    | - | 124322310 | 124322261 |
| Sma-1-1261 | NW_003038038.1 | + | 782667    | 782716    |
| Sma-1-1262 | NS_000200.1    | + | 252686060 | 252686109 |
| Sma-1-1263 | NW_003026470.1 | + | 434228    | 434277    |
| Sma-1-1264 | NS_000200.1    | + | 219558197 | 219558246 |
| Sma-1-1265 | NW_003037876.1 | + | 481325    | 481374    |
| Sma-1-1266 | NS_000200.1    | + | 121026961 | 121027010 |
| Sma-1-1267 | NW_003037882.1 | + | 233866    | 233915    |
| Sma-1-1268 | NW_003038259.1 | - | 256583    | 256534    |
| Sma-1-1269 | NS_000200.1    | + | 125525540 | 125525589 |
| Sma-1-1270 | NS_000200.1    | - | 323117182 | 323117133 |
| Sma-1-1271 | NW_003038055.1 | + | 9888      | 9937      |
| Sma-1-1272 | NS_000200.1    | + | 258709210 | 258709259 |
| Sma-1-1273 | NW_003037800.1 | - | 1311152   | 1311103   |
| Sma-1-1274 | NS_000200.1    | - | 19940512  | 19940463  |
| Sma-1-1275 | NW_003037924.1 | - | 139563    | 139514    |
| Sma-1-1276 | NS_000200.1    | - | 171846521 | 171846472 |
| Sma-1-1277 | NW_003037800.1 | - | 637253    | 637204    |
| Sma-1-1278 | NS_000200.1    | - | 19266613  | 19266564  |
| Sma-1-1279 | NW_003037917.1 | - | 1267331   | 1267282   |
| Sma-1-1280 | NS_000200.1    | - | 166304135 | 166304086 |
| Sma-1-1281 | NW_003037802.1 | - | 1021636   | 1021587   |
| Sma-1-1282 | NS_000200.1    | - | 23024430  | 23024381  |
| Sma-1-1283 | NW_003037803.1 | + | 1143974   | 1144023   |
| Sma-1-1284 | NS_000200.1    | + | 24644511  | 24644560  |
| Sma-1-1285 | NW_003037807.1 | - | 966160    | 966111    |
| Sma-1-1286 | NS_000200.1    | - | 31227676  | 31227627  |
| Sma-1-1287 | NW_003037814.1 | - | 416734    | 416685    |
| Sma-1-1288 | NS_000200.1    | - | 43400594  | 43400545  |
| Sma-1-1289 | NW_003037939.1 | + | 218579    | 218628    |
| Sma-1-1290 | NS_000200.1    | + | 183088333 | 183088382 |
| Sma-1-1291 | NW_003037890.1 | + | 1573556   | 1573605   |
| Sma-1-1292 | NW_003038084.1 | - | 110550    | 110501    |
| Sma-1-1293 | NS_000200.1    | + | 137256917 | 137256966 |
| Sma-1-1294 | NS_000200.1    | - | 271125794 | 271125745 |
| Sma-1-1295 | NW_003037891.1 | + | 1375297   | 1375346   |
| Sma-1-1296 | NS_000200.1    | + | 139256575 | 139256624 |
| Sma-1-1297 | NW_003037900.1 | + | 697952    | 698001    |
| Sma-1-1298 | NS_000200.1    | + | 145826818 | 145826867 |
| Sma-1-1299 | NW_003037834.1 | - | 1118612   | 1118563   |
| Sma-1-1300 | NS_000200.1    | - | 74279098  | 74279049  |
| Sma-1-1301 | NW_003037833.1 | + | 820105    | 820154    |
| Sma-1-1302 | NW_003038023.1 | + | 261903    | 261952    |
| Sma-1-1303 | NS_000200.1    | + | 73011201  | 73011250  |
| Sma-1-1304 | NS_000200.1    | + | 237422194 | 237422243 |
| Sma-1-1305 | NW_003037903.1 | + | 920292    | 920341    |
| Sma-1-1306 | NS_000200.1    | + | 148474373 | 148474422 |
| Sma-1-1307 | NW_003037903.1 | + | 944862    | 944911    |
| Sma-1-1308 | NS_000200.1    | + | 148498943 | 148498992 |
| Sma-1-1309 | NW_003037831.1 | - | 1686339   | 1686290   |
| Sma-1-1310 | NS_000200.1    | - | 71135641  | 71135592  |

|            |                |   |           |           |
|------------|----------------|---|-----------|-----------|
| Sma-1-1311 | NW_003037930.1 | - | 909125    | 909076    |
| Sma-1-1312 | NS_000200.1    | - | 176767089 | 176767040 |
| Sma-1-1313 | NW_003037846.1 | + | 111432    | 111481    |
| Sma-1-1314 | NS_000200.1    | + | 87746002  | 87746051  |
| Sma-1-1315 | NW_003037814.1 | - | 521561    | 521512    |
| Sma-1-1316 | NS_000200.1    | - | 43505421  | 43505372  |
| Sma-1-1317 | NW_003037914.1 | + | 1270260   | 1270309   |
| Sma-1-1318 | NW_003037932.1 | + | 443293    | 443342    |
| Sma-1-1319 | NS_000200.1    | + | 161414510 | 161414559 |
| Sma-1-1320 | NS_000200.1    | + | 177976489 | 177976538 |
| Sma-1-1321 | NW_003037918.1 | - | 33169     | 33120     |
| Sma-1-1322 | NS_000200.1    | - | 166600159 | 166600110 |
| Sma-1-1323 | NW_003037859.1 | + | 293814    | 293863    |
| Sma-1-1324 | NS_000200.1    | + | 102972655 | 102972704 |
| Sma-1-1325 | NW_003037799.1 | - | 1173877   | 1173828   |
| Sma-1-1326 | NW_003037859.1 | - | 265733    | 265684    |
| Sma-1-1327 | NW_003037979.1 | + | 465403    | 465452    |
| Sma-1-1328 | NS_000200.1    | + | 210526423 | 210526472 |
| Sma-1-1329 | NS_000200.1    | - | 102944574 | 102944525 |
| Sma-1-1330 | NS_000200.1    | - | 18164231  | 18164182  |
| Sma-1-1331 | NW_003037933.1 | - | 426070    | 426021    |
| Sma-1-1332 | NS_000200.1    | - | 178839242 | 178839193 |
| Sma-1-1333 | NW_003037938.1 | + | 423869    | 423918    |
| Sma-1-1334 | NS_000200.1    | + | 182460982 | 182461031 |
| Sma-1-1335 | NW_003030922.1 | + | 576       | 625       |
| Sma-1-1336 | NS_000200.1    | + | 370524338 | 370524387 |
| Sma-1-1337 | NW_003026487.1 | - | 122798    | 122749    |
| Sma-1-1338 | NS_000200.1    | - | 261033492 | 261033443 |
| Sma-1-1339 | NW_003038020.1 | - | 702444    | 702395    |
| Sma-1-1340 | NS_000200.1    | - | 234669788 | 234669739 |
| Sma-1-1341 | NW_003037801.1 | + | 871260    | 871309    |
| Sma-1-1342 | NS_000200.1    | + | 21960740  | 21960789  |
| Sma-1-1343 | NW_003038008.1 | - | 317333    | 317284    |
| Sma-1-1344 | NS_000200.1    | - | 225990429 | 225990380 |
| Sma-1-1345 | NW_003038028.1 | - | 621800    | 621751    |
| Sma-1-1346 | NS_000200.1    | - | 241929374 | 241929325 |
| Sma-1-1347 | NW_003037889.1 | + | 1857913   | 1857962   |
| Sma-1-1348 | NS_000200.1    | + | 135634403 | 135634452 |
| Sma-1-1349 | NW_003037891.1 | - | 2839401   | 2839352   |
| Sma-1-1350 | NS_000200.1    | - | 140720679 | 140720630 |
| Sma-1-1351 | NW_003038073.1 | - | 55892     | 55840     |
| Sma-1-1352 | NS_000200.1    | - | 265578325 | 265578273 |
| Sma-1-1353 | NW_003038084.1 | + | 232186    | 232235    |
| Sma-1-1354 | NS_000200.1    | + | 271247430 | 271247479 |
| Sma-1-1355 | NW_003038253.1 | + | 72202     | 72251     |
| Sma-1-1356 | NW_003038258.1 | - | 213425    | 213376    |
| Sma-1-1357 | NW_003026615.1 | + | 96685     | 96734     |
| Sma-1-1358 | NW_003026458.1 | + | 176755    | 176804    |
| Sma-1-1359 | NW_003037794.1 | + | 448645    | 448694    |
| Sma-1-1360 | NW_003037800.1 | - | 1510807   | 1510758   |
| Sma-1-1361 | NW_003037827.1 | - | 363224    | 363175    |
| Sma-1-1362 | NW_003037839.1 | - | 978703    | 978654    |



|            |                |   |           |           |
|------------|----------------|---|-----------|-----------|
| Sma-1-1363 | NW_003037839.1 | - | 894723    | 894674    |
| Sma-1-1364 | NW_003037918.1 | + | 1013603   | 1013652   |
| Sma-1-1365 | NW_003037946.1 | - | 1136325   | 1136276   |
| Sma-1-1366 | NW_003037963.1 | + | 231099    | 231148    |
| Sma-1-1367 | NW_003038003.1 | - | 135437    | 135388    |
| Sma-1-1368 | NW_003038031.1 | + | 693941    | 693990    |
| Sma-1-1369 | NW_003038035.1 | + | 585837    | 585886    |
| Sma-1-1370 | NW_003038069.1 | - | 59325     | 59276     |
| Sma-1-1371 | NW_003038261.1 | + | 20127     | 20176     |
| Sma-1-1372 | NW_003026488.1 | - | 300098    | 300049    |
| Sma-1-1373 | NS_000200.1    | + | 4628240   | 4628289   |
| Sma-1-1374 | NS_000200.1    | + | 102044985 | 102045034 |
| Sma-1-1375 | NS_000200.1    | + | 167580593 | 167580642 |
| Sma-1-1376 | NS_000200.1    | + | 197509311 | 197509360 |
| Sma-1-1377 | NS_000200.1    | + | 244971699 | 244971748 |
| Sma-1-1378 | NS_000200.1    | + | 248447329 | 248447378 |
| Sma-1-1379 | NS_000200.1    | + | 317091126 | 317091175 |
| Sma-1-1380 | NS_000200.1    | + | 319389999 | 319390048 |
| Sma-1-1381 | NS_000200.1    | + | 323633778 | 323633827 |
| Sma-1-1382 | NS_000200.1    | - | 322751935 | 322751886 |
| Sma-1-1383 | NS_000200.1    | - | 263902731 | 263902682 |
| Sma-1-1384 | NS_000200.1    | - | 263806592 | 263806543 |
| Sma-1-1385 | NS_000200.1    | - | 223634719 | 223634670 |
| Sma-1-1386 | NS_000200.1    | - | 191830185 | 191830136 |
| Sma-1-1387 | NS_000200.1    | - | 79936853  | 79936804  |
| Sma-1-1388 | NS_000200.1    | - | 79852873  | 79852824  |
| Sma-1-1389 | NS_000200.1    | - | 62985365  | 62985316  |
| Sma-1-1390 | NS_000200.1    | - | 20140167  | 20140118  |
| Sma-1-1391 | NW_003026456.1 | - | 283357    | 283308    |
| Sma-1-1392 | NS_000200.1    | - | 58206493  | 58206444  |
| Sma-1-1393 | NW_003037795.1 | + | 149107    | 149156    |
| Sma-1-1394 | NS_000200.1    | + | 6539990   | 6540039   |
| Sma-1-1395 | NW_003037930.1 | + | 580862    | 580911    |
| Sma-1-1396 | NW_003037930.1 | - | 580013    | 579964    |
| Sma-1-1397 | NS_000200.1    | + | 176438826 | 176438875 |
| Sma-1-1398 | NS_000200.1    | - | 176437977 | 176437928 |
| Sma-1-1399 | NW_003037794.1 | + | 227757    | 227806    |
| Sma-1-1400 | NS_000200.1    | + | 4407352   | 4407401   |
| Sma-1-1401 | NW_003037940.1 | + | 947378    | 947427    |
| Sma-1-1402 | NS_000200.1    | + | 184689508 | 184689557 |
| Sma-1-1403 | NW_003037978.1 | - | 282973    | 282924    |
| Sma-1-1404 | NS_000200.1    | - | 209550983 | 209550934 |
| Sma-1-1405 | NW_003037945.1 | + | 1292593   | 1292642   |
| Sma-1-1406 | NS_000200.1    | + | 190394557 | 190394606 |
| Sma-1-1407 | NW_003022908.1 | - | 948       | 899       |
| Sma-1-1408 | NS_000200.1    | - | 371859929 | 371859880 |
| Sma-1-1409 | NW_003037830.1 | - | 1503869   | 1503820   |
| Sma-1-1410 | NW_003037918.1 | - | 1644177   | 1644128   |
| Sma-1-1411 | NS_000200.1    | - | 168211167 | 168211118 |
| Sma-1-1412 | NS_000200.1    | - | 69394240  | 69394191  |
| Sma-1-1413 | NW_003037799.1 | + | 738237    | 738286    |
| Sma-1-1414 | NS_000200.1    | + | 17728591  | 17728640  |

|            |                |   |           |           |
|------------|----------------|---|-----------|-----------|
| Sma-1-1415 | NW_003033033.1 | - | 2831      | 2782      |
| Sma-1-1416 | NW_003037851.1 | + | 512895    | 512944    |
| Sma-1-1417 | NS_000200.1    | + | 93916205  | 93916254  |
| Sma-1-1418 | NS_000200.1    | - | 326239284 | 326239235 |
| Sma-1-1419 | NW_003037967.1 | - | 160299    | 160250    |
| Sma-1-1420 | NS_000200.1    | - | 199400270 | 199400221 |
| Sma-1-1421 | NW_003038244.1 | - | 211206    | 211157    |
| Sma-1-1422 | NS_000200.1    | - | 315356411 | 315356362 |
| Sma-1-1423 | NW_003037914.1 | - | 1703691   | 1703642   |
| Sma-1-1424 | NW_003038025.1 | - | 74491     | 74442     |
| Sma-1-1425 | NS_000200.1    | - | 238932736 | 238932687 |
| Sma-1-1426 | NS_000200.1    | - | 161847941 | 161847892 |
| Sma-1-1427 | NW_003037818.1 | - | 2072319   | 2072270   |
| Sma-1-1428 | NS_000200.1    | - | 50787726  | 50787677  |
| Sma-1-1429 | NW_003037793.1 | + | 2547084   | 2547133   |
| Sma-1-1430 | NS_000200.1    | + | 2547084   | 2547133   |
| Sma-1-1431 | NW_003027917.1 | - | 219       | 170       |
| Sma-1-1432 | NW_003037796.1 | - | 443968    | 443919    |
| Sma-1-1433 | NS_000200.1    | - | 366149935 | 366149886 |
| Sma-1-1434 | NS_000200.1    | - | 8653612   | 8653563   |
| Sma-1-1435 | NW_003026462.1 | - | 475233    | 475184    |
| Sma-1-1436 | NS_000200.1    | - | 197142736 | 197142687 |
| Sma-1-1437 | NW_003037824.1 | + | 780141    | 780190    |
| Sma-1-1438 | NW_003037824.1 | - | 148709    | 148660    |
| Sma-1-1439 | NS_000200.1    | + | 57711081  | 57711130  |
| Sma-1-1440 | NS_000200.1    | - | 57079649  | 57079600  |
| Sma-1-1441 | NW_003037826.1 | + | 617521    | 617570    |
| Sma-1-1442 | NS_000200.1    | + | 61617037  | 61617086  |
| Sma-1-1443 | NW_003037915.1 | - | 294743    | 294694    |
| Sma-1-1444 | NS_000200.1    | - | 162194729 | 162194680 |
| Sma-1-1445 | NW_003037924.1 | + | 605505    | 605554    |
| Sma-1-1446 | NS_000200.1    | + | 172312463 | 172312512 |
| Sma-1-1447 | NW_003037938.1 | + | 491829    | 491878    |
| Sma-1-1448 | NS_000200.1    | + | 182528942 | 182528991 |
| Sma-1-1449 | NW_003038069.1 | - | 370606    | 370557    |
| Sma-1-1450 | NS_000200.1    | - | 264214012 | 264213963 |
| Sma-1-1451 | NW_003037888.1 | + | 832246    | 832295    |
| Sma-1-1452 | NS_000200.1    | + | 133040738 | 133040787 |
| Sma-1-1453 | NW_003037973.1 | - | 31785     | 31736     |
| Sma-1-1454 | NS_000200.1    | - | 204013512 | 204013463 |
| Sma-1-1455 | NW_003038010.1 | - | 411093    | 411044    |
| Sma-1-1456 | NS_000200.1    | - | 227229316 | 227229267 |
| Sma-1-1457 | NW_003038137.1 | + | 216161    | 216210    |
| Sma-1-1458 | NS_000200.1    | + | 285005057 | 285005106 |
| Sma-1-1459 | NW_003038232.1 | + | 335678    | 335727    |
| Sma-1-1460 | NS_000200.1    | + | 312299469 | 312299518 |
| Sma-1-1461 | NW_003026456.1 | - | 285089    | 285040    |
| Sma-1-1462 | NW_003037914.1 | - | 1250909   | 1250860   |
| Sma-1-1463 | NW_003038015.1 | - | 201800    | 201751    |
| Sma-1-1464 | NS_000200.1    | - | 230525290 | 230525241 |
| Sma-1-1465 | NS_000200.1    | - | 161395159 | 161395110 |
| Sma-1-1466 | NS_000200.1    | - | 58208225  | 58208176  |

|            |                |   |           |           |
|------------|----------------|---|-----------|-----------|
| Sma-1-1467 | NW_003037977.1 | - | 655095    | 655046    |
| Sma-1-1468 | NS_000200.1    | - | 208941115 | 208941066 |
| Sma-1-1469 | NW_003038015.1 | - | 164138    | 164089    |
| Sma-1-1470 | NS_000200.1    | - | 230487628 | 230487579 |
| Sma-1-1471 | NW_003038148.1 | - | 89824     | 89775     |
| Sma-1-1472 | NS_000200.1    | - | 290163808 | 290163759 |
| Sma-1-1473 | NW_003038015.1 | - | 549843    | 549794    |
| Sma-1-1474 | NS_000200.1    | - | 230873333 | 230873284 |
| Sma-1-1475 | NW_003037845.1 | + | 13796     | 13845     |
| Sma-1-1476 | NS_000200.1    | + | 87015699  | 87015748  |
| Sma-1-1477 | NW_003038037.1 | + | 851159    | 851208    |
| Sma-1-1478 | NS_000200.1    | + | 251006568 | 251006617 |
| Sma-1-1479 | NW_003038196.1 | + | 15398     | 15447     |
| Sma-1-1480 | NS_000200.1    | + | 303157681 | 303157730 |
| Sma-1-1481 | NW_003037810.1 | - | 170332    | 170283    |
| Sma-1-1482 | NS_000200.1    | - | 36774854  | 36774805  |
| Sma-1-1483 | NW_003037981.1 | - | 984726    | 984677    |
| Sma-1-1484 | NS_000200.1    | - | 213382594 | 213382545 |
| Sma-1-1485 | NW_003037973.1 | - | 71341     | 71292     |
| Sma-1-1486 | NS_000200.1    | - | 204053068 | 204053019 |
| Sma-1-1487 | NW_003037913.1 | + | 887852    | 887901    |
| Sma-1-1488 | NS_000200.1    | + | 159451603 | 159451652 |
| Sma-1-1489 | NW_003039130.1 | - | 163397    | 163348    |
| Sma-1-1490 | NS_000200.1    | - | 317838008 | 317837959 |
| Sma-1-1491 | NW_003038260.1 | + | 283258    | 283307    |
| Sma-1-1492 | NS_000200.1    | + | 323455033 | 323455082 |
| Sma-1-1493 | NW_003037812.1 | + | 948266    | 948315    |
| Sma-1-1494 | NS_000200.1    | + | 40431005  | 40431054  |
| Sma-1-1495 | NW_003037809.1 | + | 881566    | 881615    |
| Sma-1-1496 | NS_000200.1    | + | 34546030  | 34546079  |
| Sma-1-1497 | NW_003037809.1 | - | 1503197   | 1503148   |
| Sma-1-1498 | NS_000200.1    | - | 35167661  | 35167612  |
| Sma-1-1499 | NW_003037808.1 | + | 237436    | 237485    |
| Sma-1-1500 | NS_000200.1    | + | 32024073  | 32024122  |
| Sma-1-1501 | NW_003037799.1 | + | 1093628   | 1093677   |
| Sma-1-1502 | NS_000200.1    | + | 18083982  | 18084031  |
| Sma-1-1503 | NW_003026456.1 | + | 242687    | 242736    |
| Sma-1-1504 | NS_000200.1    | + | 58165823  | 58165872  |
| Sma-1-1505 | NW_003037982.1 | + | 860137    | 860186    |
| Sma-1-1506 | NS_000200.1    | + | 214519332 | 214519381 |
| Sma-1-1507 | NW_003037943.1 | + | 604182    | 604231    |
| Sma-1-1508 | NS_000200.1    | + | 187625715 | 187625764 |
| Sma-1-1509 | NW_003037913.1 | - | 1326085   | 1326036   |
| Sma-1-1510 | NS_000200.1    | - | 159889836 | 159889787 |
| Sma-1-1511 | NW_003037785.1 | + | 84201     | 84250     |
| Sma-1-1512 | NS_000200.1    | + | 379982868 | 379982917 |
| Sma-1-1513 | NW_003037799.1 | + | 912715    | 912764    |
| Sma-1-1514 | NW_003037883.1 | - | 139074    | 139025    |
| Sma-1-1515 | NS_000200.1    | + | 17903069  | 17903118  |
| Sma-1-1516 | NS_000200.1    | - | 126202797 | 126202748 |
| Sma-1-1517 | NW_003037958.1 | + | 328356    | 328405    |
| Sma-1-1518 | NS_000200.1    | + | 194992540 | 194992589 |

|            |                |   |           |           |
|------------|----------------|---|-----------|-----------|
| Sma-1-1519 | NW_003037964.1 | - | 39479     | 39430     |
| Sma-1-1520 | NS_000200.1    | - | 197641001 | 197640952 |
| Sma-1-1521 | NW_003037964.1 | - | 425668    | 425619    |
| Sma-1-1522 | NS_000200.1    | - | 198027190 | 198027141 |
| Sma-1-1523 | NW_003027978.1 | - | 750       | 701       |
| Sma-1-1524 | NW_003038148.1 | + | 398236    | 398285    |
| Sma-1-1525 | NS_000200.1    | + | 290472220 | 290472269 |
| Sma-1-1526 | NS_000200.1    | - | 369105026 | 369104977 |
| Sma-1-1527 | NW_003022658.1 | + | 34        | 83        |
| Sma-1-1528 | NW_003037822.1 | + | 236759    | 236808    |
| Sma-1-1529 | NW_003037905.1 | + | 497398    | 497447    |
| Sma-1-1530 | NW_003038037.1 | - | 732426    | 732377    |
| Sma-1-1531 | NS_000200.1    | + | 54544765  | 54544814  |
| Sma-1-1532 | NS_000200.1    | + | 149766410 | 149766459 |
| Sma-1-1533 | NS_000200.1    | + | 365367852 | 365367901 |
| Sma-1-1534 | NS_000200.1    | - | 250887835 | 250887786 |
| Sma-1-1535 | NW_003026465.1 | + | 246387    | 246436    |
| Sma-1-1536 | NS_000200.1    | + | 207638981 | 207639030 |
| Sma-1-1537 | NW_003038135.1 | + | 228603    | 228652    |
| Sma-1-1538 | NS_000200.1    | + | 284100942 | 284100991 |
| Sma-1-1539 | NW_003038028.1 | - | 683466    | 683417    |
| Sma-1-1540 | NS_000200.1    | - | 241991040 | 241990991 |
| Sma-1-1541 | NW_003038032.1 | - | 445762    | 445713    |
| Sma-1-1542 | NS_000200.1    | - | 245604922 | 245604873 |
| Sma-1-1543 | NW_003038509.1 | + | 92048     | 92097     |
| Sma-1-1544 | NW_003037934.1 | - | 132257    | 132208    |
| Sma-1-1545 | NW_003037793.1 | + | 757979    | 758028    |
| Sma-1-1546 | NW_003037928.1 | - | 72546     | 72497     |
| Sma-1-1547 | NW_003037943.1 | - | 1164722   | 1164673   |
| Sma-1-1548 | NW_003037981.1 | + | 831813    | 831862    |
| Sma-1-1549 | NW_003037989.1 | + | 169925    | 169974    |
| Sma-1-1550 | NW_003038007.1 | + | 371681    | 371730    |
| Sma-1-1551 | NW_003038015.1 | + | 264091    | 264140    |
| Sma-1-1552 | NW_003038238.1 | - | 104099    | 104050    |
| Sma-1-1553 | NW_003038099.1 | + | 3688      | 3737      |
| Sma-1-1554 | NW_003038127.1 | + | 200472    | 200521    |
| Sma-1-1555 | NS_000200.1    | + | 757979    | 758028    |
| Sma-1-1556 | NS_000200.1    | + | 213229681 | 213229730 |
| Sma-1-1557 | NS_000200.1    | + | 216780484 | 216780533 |
| Sma-1-1558 | NS_000200.1    | + | 225620236 | 225620285 |
| Sma-1-1559 | NS_000200.1    | + | 230587581 | 230587630 |
| Sma-1-1560 | NS_000200.1    | + | 274461901 | 274461950 |
| Sma-1-1561 | NS_000200.1    | + | 280592178 | 280592227 |
| Sma-1-1562 | NS_000200.1    | + | 337724500 | 337724549 |
| Sma-1-1563 | NS_000200.1    | - | 313710880 | 313710831 |
| Sma-1-1564 | NS_000200.1    | - | 188186255 | 188186206 |
| Sma-1-1565 | NS_000200.1    | - | 179179004 | 179178955 |
| Sma-1-1566 | NS_000200.1    | - | 174396499 | 174396450 |
| Sma-1-1567 | NW_003038441.1 | - | 3501      | 3452      |
| Sma-1-1568 | NS_000200.1    | - | 329750873 | 329750824 |
| Sma-1-1569 | NW_003037801.1 | - | 580141    | 580092    |
| Sma-1-1570 | NS_000200.1    | - | 21669621  | 21669572  |

|            |                |   |           |           |
|------------|----------------|---|-----------|-----------|
| Sma-1-1571 | NW_003037928.1 | + | 553209    | 553258    |
| Sma-1-1572 | NS_000200.1    | + | 174877162 | 174877211 |
| Sma-1-1573 | NW_003037971.1 | + | 269047    | 269096    |
| Sma-1-1574 | NS_000200.1    | + | 201891097 | 201891146 |
| Sma-1-1575 | NW_003026517.1 | + | 129541    | 129590    |
| Sma-1-1576 | NS_000200.1    | + | 299735550 | 299735599 |
| Sma-1-1577 | NW_003038033.1 | + | 949242    | 949291    |
| Sma-1-1578 | NS_000200.1    | + | 246929244 | 246929293 |
| Sma-1-1579 | NW_003038505.1 | + | 257941    | 257990    |
| Sma-1-1580 | NS_000200.1    | + | 336337278 | 336337327 |
| Sma-1-1581 | NW_003037839.1 | - | 75147     | 75098     |
| Sma-1-1582 | NW_003038126.1 | + | 375352    | 375401    |
| Sma-1-1583 | NS_000200.1    | + | 280385764 | 280385813 |
| Sma-1-1584 | NS_000200.1    | - | 79033297  | 79033248  |
| Sma-1-1585 | NW_003037796.1 | - | 2113407   | 2113358   |
| Sma-1-1586 | NW_003037886.1 | - | 443847    | 443798    |
| Sma-1-1587 | NS_000200.1    | - | 129699414 | 129699365 |
| Sma-1-1588 | NS_000200.1    | - | 10323051  | 10323002  |
| Sma-1-1589 | NW_003037933.1 | - | 77587     | 77538     |
| Sma-1-1590 | NS_000200.1    | - | 178490759 | 178490710 |
| Sma-1-1591 | NW_003036918.1 | + | 1431      | 1480      |
| Sma-1-1592 | NS_000200.1    | + | 343396144 | 343396193 |
| Sma-1-1593 | NW_003037952.1 | + | 39217     | 39266     |
| Sma-1-1594 | NW_003037804.1 | + | 698705    | 698754    |
| Sma-1-1595 | NS_000200.1    | + | 25838725  | 25838774  |
| Sma-1-1596 | NS_000200.1    | + | 192859350 | 192859399 |
| Sma-1-1597 | NW_003037973.1 | + | 427749    | 427798    |
| Sma-1-1598 | NS_000200.1    | + | 204409476 | 204409525 |
| Sma-1-1599 | NW_003038251.1 | + | 480919    | 480968    |
| Sma-1-1600 | NS_000200.1    | + | 318812691 | 318812740 |
| Sma-1-1601 | NW_003038153.1 | + | 693273    | 693322    |
| Sma-1-1602 | NS_000200.1    | + | 293755322 | 293755371 |
| Sma-1-1603 | NW_003038056.1 | + | 110879    | 110928    |
| Sma-1-1604 | NS_000200.1    | + | 259088530 | 259088579 |
| Sma-1-1605 | NW_003038031.1 | + | 199879    | 199928    |
| Sma-1-1606 | NS_000200.1    | + | 244477637 | 244477686 |
| Sma-1-1607 | NW_003037817.1 | - | 457337    | 457288    |
| Sma-1-1608 | NS_000200.1    | - | 47839689  | 47839640  |
| Sma-1-1609 | NW_003037832.1 | + | 451956    | 452005    |
| Sma-1-1610 | NS_000200.1    | + | 71661387  | 71661436  |
| Sma-1-1611 | NW_003037853.1 | + | 756115    | 756164    |
| Sma-1-1612 | NS_000200.1    | + | 96248166  | 96248215  |
| Sma-1-1613 | NW_003037918.1 | + | 137607    | 137656    |
| Sma-1-1614 | NS_000200.1    | + | 166704597 | 166704646 |
| Sma-1-1615 | NW_003038010.1 | - | 268980    | 268931    |
| Sma-1-1616 | NS_000200.1    | - | 227087203 | 227087154 |
| Sma-1-1617 | NW_003038511.1 | + | 201279    | 201328    |
| Sma-1-1618 | NS_000200.1    | + | 338546491 | 338546540 |
| Sma-1-1619 | NW_003033994.1 | + | 929       | 978       |
| Sma-1-1620 | NS_000200.1    | + | 363378517 | 363378566 |
| Sma-1-1621 | NW_003037859.1 | + | 876521    | 876570    |
| Sma-1-1622 | NS_000200.1    | + | 103555362 | 103555411 |

|            |                |   |           |           |
|------------|----------------|---|-----------|-----------|
| Sma-1-1623 | NW_003037863.1 | + | 838175    | 838224    |
| Sma-1-1624 | NW_003038037.1 | + | 1152941   | 1152990   |
| Sma-1-1625 | NS_000200.1    | + | 107596542 | 107596591 |
| Sma-1-1626 | NS_000200.1    | + | 251308350 | 251308399 |
| Sma-1-1627 | NW_003037865.1 | + | 606578    | 606627    |
| Sma-1-1628 | NW_003038067.1 | + | 122467    | 122516    |
| Sma-1-1629 | NS_000200.1    | + | 111028497 | 111028546 |
| Sma-1-1630 | NS_000200.1    | + | 262976520 | 262976569 |
| Sma-1-1631 | NW_003037871.1 | - | 384370    | 384321    |
| Sma-1-1632 | NS_000200.1    | - | 117832108 | 117832059 |
| Sma-1-1633 | NW_003038068.1 | - | 274743    | 274694    |
| Sma-1-1634 | NS_000200.1    | - | 263341951 | 263341902 |
| Sma-1-1635 | NW_003032235.1 | + | 1799      | 1848      |
| Sma-1-1636 | NW_003038258.1 | + | 279284    | 279333    |
| Sma-1-1637 | NS_000200.1    | + | 322817794 | 322817843 |
| Sma-1-1638 | NS_000200.1    | + | 357970176 | 357970225 |
| Sma-1-1639 | NW_003037940.1 | - | 39446     | 39397     |
| Sma-1-1640 | NW_003038053.1 | - | 408159    | 408110    |
| Sma-1-1641 | NW_003038161.1 | - | 267276    | 267227    |
| Sma-1-1642 | NS_000200.1    | - | 297637127 | 297637078 |
| Sma-1-1643 | NS_000200.1    | - | 257768254 | 257768205 |
| Sma-1-1644 | NS_000200.1    | - | 183781576 | 183781527 |
| Sma-1-1645 | NW_003037884.1 | + | 1250073   | 1250122   |
| Sma-1-1646 | NS_000200.1    | + | 128029738 | 128029787 |
| Sma-1-1647 | NW_003037796.1 | + | 400918    | 400966    |
| Sma-1-1648 | NS_000200.1    | + | 8610562   | 8610610   |
| Sma-1-1649 | NW_003037877.1 | + | 559038    | 559087    |
| Sma-1-1650 | NS_000200.1    | + | 121597600 | 121597649 |
| Sma-1-1651 | NW_003037877.1 | + | 538456    | 538505    |
| Sma-1-1652 | NS_000200.1    | + | 121577018 | 121577067 |
| Sma-1-1653 | NW_003038038.1 | - | 1142564   | 1142515   |
| Sma-1-1654 | NS_000200.1    | - | 253045957 | 253045908 |
| Sma-1-1655 | NW_003037818.1 | - | 1720656   | 1720607   |
| Sma-1-1656 | NS_000200.1    | - | 50436063  | 50436014  |
| Sma-1-1657 | NW_003037880.1 | - | 602588    | 602539    |
| Sma-1-1658 | NS_000200.1    | - | 124286146 | 124286097 |
| Sma-1-1659 | NS_000200.1    | + | 348664654 | 348664703 |
| Sma-1-1660 | NW_003037785.1 | + | 85401     | 85450     |
| Sma-1-1661 | NS_000200.1    | + | 379984068 | 379984117 |
| Sma-1-1662 | NW_003037787.1 | + | 91613     | 91662     |
| Sma-1-1663 | NS_000200.1    | + | 380339782 | 380339831 |
| Sma-1-1664 | NW_003037808.1 | - | 681640    | 681591    |
| Sma-1-1665 | NS_000200.1    | - | 32468277  | 32468228  |
| Sma-1-1666 | NW_003037863.1 | - | 657377    | 657328    |
| Sma-1-1667 | NS_000200.1    | - | 107415744 | 107415695 |
| Sma-1-1668 | NW_003037799.1 | + | 765165    | 765214    |
| Sma-1-1669 | NS_000200.1    | + | 17755519  | 17755568  |
| Sma-1-1670 | NW_003037788.1 | - | 221962    | 221913    |
| Sma-1-1671 | NS_000200.1    | - | 380669200 | 380669151 |
| Sma-1-1672 | NW_003037809.1 | - | 1783306   | 1783257   |
| Sma-1-1673 | NS_000200.1    | - | 35447770  | 35447721  |
| Sma-1-1674 | NW_003037800.1 | - | 1408400   | 1408351   |

|            |                |   |           |           |
|------------|----------------|---|-----------|-----------|
| Sma-1-1675 | NS.000200.1    | - | 20037760  | 20037711  |
| Sma-1-1676 | NW_003037914.1 | + | 1185081   | 1185130   |
| Sma-1-1677 | NS.000200.1    | + | 161329331 | 161329380 |
| Sma-1-1678 | NW_003037803.1 | - | 454699    | 454650    |
| Sma-1-1679 | NS.000200.1    | - | 23955236  | 23955187  |
| Sma-1-1680 | NW_003038244.1 | - | 52103     | 52054     |
| Sma-1-1681 | NS.000200.1    | - | 315197308 | 315197259 |
| Sma-1-1682 | NW_003037813.1 | + | 733048    | 733097    |
| Sma-1-1683 | NS.000200.1    | + | 41719911  | 41719960  |
| Sma-1-1684 | NW_003037761.1 | - | 14281     | 14232     |
| Sma-1-1685 | NS.000200.1    | - | 377640427 | 377640378 |
| Sma-1-1686 | NW_003037797.1 | + | 2866010   | 2866059   |
| Sma-1-1687 | NS.000200.1    | + | 13293870  | 13293919  |
| Sma-1-1688 | NW_003037815.1 | + | 369540    | 369589    |
| Sma-1-1689 | NS.000200.1    | + | 45632531  | 45632580  |
| Sma-1-1690 | NW_003037882.1 | - | 268072    | 268023    |
| Sma-1-1691 | NS.000200.1    | - | 125559746 | 125559697 |
| Sma-1-1692 | NW_003037886.1 | + | 214242    | 214291    |
| Sma-1-1693 | NS.000200.1    | + | 129469809 | 129469858 |
| Sma-1-1694 | NW_003037830.1 | - | 1454761   | 1454712   |
| Sma-1-1695 | NS.000200.1    | - | 69345132  | 69345083  |
| Sma-1-1696 | NW_003037884.1 | + | 1054022   | 1054071   |
| Sma-1-1697 | NS.000200.1    | + | 127833687 | 127833736 |
| Sma-1-1698 | NW_003037887.1 | + | 648223    | 648272    |
| Sma-1-1699 | NS.000200.1    | + | 131112201 | 131112250 |
| Sma-1-1700 | NW_003037859.1 | + | 712916    | 712965    |
| Sma-1-1701 | NS.000200.1    | + | 103391757 | 103391806 |
| Sma-1-1702 | NW_003037822.1 | - | 983813    | 983764    |
| Sma-1-1703 | NS.000200.1    | - | 55291819  | 55291770  |
| Sma-1-1704 | NW_003037836.1 | + | 321663    | 321712    |
| Sma-1-1705 | NS.000200.1    | + | 75878762  | 75878811  |
| Sma-1-1706 | NW_003037851.1 | - | 787886    | 787837    |
| Sma-1-1707 | NS.000200.1    | - | 94191196  | 94191147  |
| Sma-1-1708 | NW_003037891.1 | + | 593631    | 593680    |
| Sma-1-1709 | NS.000200.1    | + | 138474909 | 138474958 |
| Sma-1-1710 | NW_003037841.1 | - | 1976130   | 1976081   |
| Sma-1-1711 | NS.000200.1    | - | 84587311  | 84587262  |
| Sma-1-1712 | NW_003037899.1 | + | 233550    | 233599    |
| Sma-1-1713 | NS.000200.1    | + | 144752661 | 144752710 |
| Sma-1-1714 | NW_003037837.1 | - | 449535    | 449486    |
| Sma-1-1715 | NS.000200.1    | - | 77255393  | 77255344  |
| Sma-1-1716 | NW_003037834.1 | - | 191861    | 191812    |
| Sma-1-1717 | NS.000200.1    | - | 73352347  | 73352298  |
| Sma-1-1718 | NW_003037833.1 | + | 77974     | 78023     |
| Sma-1-1719 | NS.000200.1    | + | 72269070  | 72269119  |
| Sma-1-1720 | NW_003037831.1 | - | 1292750   | 1292700   |
| Sma-1-1721 | NS.000200.1    | - | 70742052  | 70742002  |
| Sma-1-1722 | NW_003037905.1 | - | 69628     | 69579     |
| Sma-1-1723 | NS.000200.1    | - | 149338640 | 149338591 |
| Sma-1-1724 | NW_003038516.1 | - | 184786    | 184737    |
| Sma-1-1725 | NS.000200.1    | - | 340673191 | 340673142 |
| Sma-1-1726 | NW_003037825.1 | + | 90396     | 90445     |

|            |                |   |           |           |
|------------|----------------|---|-----------|-----------|
| Sma-1-1727 | NS.000200.1    | + | 59220178  | 59220227  |
| Sma-1-1728 | NW_003037824.1 | + | 981756    | 981805    |
| Sma-1-1729 | NS.000200.1    | + | 57912696  | 57912745  |
| Sma-1-1730 | NW_003037885.1 | - | 733380    | 733331    |
| Sma-1-1731 | NS.000200.1    | - | 128831327 | 128831278 |
| Sma-1-1732 | NW_003037824.1 | - | 877306    | 877257    |
| Sma-1-1733 | NS.000200.1    | - | 57808246  | 57808197  |
| Sma-1-1734 | NW_003037982.1 | + | 825856    | 825905    |
| Sma-1-1735 | NS.000200.1    | + | 214485051 | 214485100 |
| Sma-1-1736 | NW_003026470.1 | - | 512917    | 512868    |
| Sma-1-1737 | NW_003037809.1 | - | 2606228   | 2606179   |
| Sma-1-1738 | NW_003037889.1 | - | 1687391   | 1687342   |
| Sma-1-1739 | NW_003037902.1 | + | 187099    | 187148    |
| Sma-1-1740 | NW_003037912.1 | + | 1070168   | 1070217   |
| Sma-1-1741 | NS.000200.1    | + | 146942333 | 146942382 |
| Sma-1-1742 | NS.000200.1    | + | 157881743 | 157881792 |
| Sma-1-1743 | NS.000200.1    | - | 219636886 | 219636837 |
| Sma-1-1744 | NS.000200.1    | - | 135463881 | 135463832 |
| Sma-1-1745 | NS.000200.1    | - | 36270692  | 36270643  |
| Sma-1-1746 | NW_003037798.1 | + | 2042370   | 2042419   |
| Sma-1-1747 | NS.000200.1    | + | 16301528  | 16301577  |
| Sma-1-1748 | NW_003037956.1 | - | 18136     | 18087     |
| Sma-1-1749 | NS.000200.1    | - | 194074591 | 194074542 |
| Sma-1-1750 | NW_003037974.1 | + | 865363    | 865412    |
| Sma-1-1751 | NS.000200.1    | + | 205540669 | 205540718 |
| Sma-1-1752 | NW_003037806.1 | - | 580214    | 580165    |
| Sma-1-1753 | NS.000200.1    | - | 28775428  | 28775379  |
| Sma-1-1754 | NW_003037795.1 | - | 594490    | 594441    |
| Sma-1-1755 | NS.000200.1    | - | 6985373   | 6985324   |
| Sma-1-1756 | NW_003037800.1 | + | 1966717   | 1966766   |
| Sma-1-1757 | NS.000200.1    | + | 20596077  | 20596126  |
| Sma-1-1758 | NW_003037818.1 | + | 1029741   | 1029790   |
| Sma-1-1759 | NS.000200.1    | + | 49745148  | 49745197  |
| Sma-1-1760 | NW_003037916.1 | - | 1502320   | 1502271   |
| Sma-1-1761 | NS.000200.1    | - | 164695731 | 164695682 |
| Sma-1-1762 | NW_003037829.1 | - | 1763089   | 1763040   |
| Sma-1-1763 | NS.000200.1    | - | 67663627  | 67663578  |
| Sma-1-1764 | NW_003037819.1 | + | 638760    | 638809    |
| Sma-1-1765 | NW_003037819.1 | + | 643503    | 643552    |
| Sma-1-1766 | NS.000200.1    | + | 51727025  | 51727074  |
| Sma-1-1767 | NS.000200.1    | + | 51731768  | 51731817  |
| Sma-1-1768 | NW_003038943.1 | + | 1126      | 1175      |
| Sma-1-1769 | NW_003037825.1 | - | 115841    | 115792    |
| Sma-1-1770 | NS.000200.1    | + | 356389319 | 356389368 |
| Sma-1-1771 | NS.000200.1    | - | 59245623  | 59245574  |
| Sma-1-1772 | NW_003038508.1 | + | 43080     | 43129     |
| Sma-1-1773 | NS.000200.1    | + | 337150048 | 337150097 |
| Sma-1-1774 | NW_003035869.1 | + | 118247    | 118296    |
| Sma-1-1775 | NW_003038019.1 | + | 186588    | 186637    |
| Sma-1-1776 | NS.000200.1    | + | 233503406 | 233503455 |
| Sma-1-1777 | NS.000200.1    | + | 335302447 | 335302496 |
| Sma-1-1778 | NW_003037802.1 | + | 51338     | 51387     |



|            |                |   |           |           |
|------------|----------------|---|-----------|-----------|
| Sma-1-1779 | NS_000200.1    | + | 22054132  | 22054181  |
| Sma-1-1780 | NW_003037910.1 | + | 50310     | 50359     |
| Sma-1-1781 | NS_000200.1    | + | 154562285 | 154562334 |
| Sma-1-1782 | NW_003038252.1 | - | 198461    | 198412    |
| Sma-1-1783 | NS_000200.1    | - | 319054049 | 319054000 |
| Sma-1-1784 | NW_003037972.1 | - | 263599    | 263550    |
| Sma-1-1785 | NW_003038151.1 | + | 131595    | 131644    |
| Sma-1-1786 | NS_000200.1    | + | 292038838 | 292038887 |
| Sma-1-1787 | NS_000200.1    | - | 202739303 | 202739254 |
| Sma-1-1788 | NW_003037913.1 | - | 1466496   | 1466447   |
| Sma-1-1789 | NS_000200.1    | - | 160030247 | 160030198 |
| Sma-1-1790 | NW_003037918.1 | - | 1904169   | 1904120   |
| Sma-1-1791 | NS_000200.1    | - | 168471159 | 168471110 |
| Sma-1-1792 | NW_003037826.1 | + | 391383    | 391432    |
| Sma-1-1793 | NW_003037975.1 | + | 388638    | 388687    |
| Sma-1-1794 | NS_000200.1    | + | 61390899  | 61390948  |
| Sma-1-1795 | NS_000200.1    | + | 205970862 | 205970911 |
| Sma-1-1796 | NW_003037980.1 | - | 1267616   | 1267567   |
| Sma-1-1797 | NS_000200.1    | - | 212228478 | 212228429 |
| Sma-1-1798 | NW_003037833.1 | - | 642336    | 642287    |
| Sma-1-1799 | NS_000200.1    | - | 72833432  | 72833383  |
| Sma-1-1800 | NW_003037798.1 | - | 1993817   | 1993768   |
| Sma-1-1801 | NW_003037811.1 | + | 1310298   | 1310347   |
| Sma-1-1802 | NS_000200.1    | + | 39480540  | 39480589  |
| Sma-1-1803 | NS_000200.1    | - | 16252975  | 16252926  |
| Sma-1-1804 | NW_003037841.1 | + | 1548537   | 1548586   |
| Sma-1-1805 | NW_003038016.1 | + | 518172    | 518221    |
| Sma-1-1806 | NS_000200.1    | + | 84159718  | 84159767  |
| Sma-1-1807 | NS_000200.1    | + | 231634709 | 231634758 |
| Sma-1-1808 | NW_003037817.1 | - | 614726    | 614677    |
| Sma-1-1809 | NS_000200.1    | - | 47997078  | 47997029  |
| Sma-1-1810 | NW_003037809.1 | - | 63700     | 63650     |
| Sma-1-1811 | NS_000200.1    | - | 33728164  | 33728114  |
| Sma-1-1812 | NW_003037807.1 | + | 302363    | 302412    |
| Sma-1-1813 | NS_000200.1    | + | 30563879  | 30563928  |
| Sma-1-1814 | NW_003037801.1 | - | 489769    | 489720    |
| Sma-1-1815 | NS_000200.1    | - | 21579249  | 21579200  |
| Sma-1-1816 | NW_003037909.1 | - | 602983    | 602934    |
| Sma-1-1817 | NS_000200.1    | - | 154144632 | 154144583 |
| Sma-1-1818 | NW_003037954.1 | - | 14893     | 14844     |
| Sma-1-1819 | NW_003038148.1 | - | 343321    | 343272    |
| Sma-1-1820 | NS_000200.1    | - | 290417305 | 290417256 |
| Sma-1-1821 | NS_000200.1    | - | 193244515 | 193244466 |
| Sma-1-1822 | NW_003038083.1 | + | 683734    | 683783    |
| Sma-1-1823 | NS_000200.1    | + | 270927071 | 270927120 |
| Sma-1-1824 | NW_003026483.1 | - | 44613     | 44564     |
| Sma-1-1825 | NS_000200.1    | - | 256559137 | 256559088 |
| Sma-1-1826 | NW_003038628.1 | - | 1079      | 1030      |
| Sma-1-1827 | NW_003037795.1 | - | 1322389   | 1322340   |
| Sma-1-1828 | NS_000200.1    | - | 345644328 | 345644279 |
| Sma-1-1829 | NS_000200.1    | - | 7713272   | 7713223   |
| Sma-1-1830 | NW_003038131.1 | + | 165844    | 165893    |

|            |                |   |           |           |
|------------|----------------|---|-----------|-----------|
| Sma-1-1831 | NS.000200.1    | + | 282127688 | 282127737 |
| Sma-1-1832 | NW_003035169.1 | - | 1367      | 1318      |
| Sma-1-1833 | NW_003037912.1 | + | 1691657   | 1691706   |
| Sma-1-1834 | NS.000200.1    | + | 158503232 | 158503281 |
| Sma-1-1835 | NS.000200.1    | - | 370730299 | 370730250 |
| Sma-1-1836 | NW_003037797.1 | + | 3249364   | 3249413   |
| Sma-1-1837 | NS.000200.1    | + | 13677224  | 13677273  |
| Sma-1-1838 | NW_003038031.1 | - | 197700    | 197651    |
| Sma-1-1839 | NS.000200.1    | - | 244475458 | 244475409 |
| Sma-1-1840 | NW_003038261.1 | + | 136724    | 136773    |
| Sma-1-1841 | NS.000200.1    | + | 323750375 | 323750424 |
| Sma-1-1842 | NW_003037819.1 | - | 739912    | 739863    |
| Sma-1-1843 | NS.000200.1    | - | 51828177  | 51828128  |
| Sma-1-1844 | NW_003026465.1 | - | 338438    | 338389    |
| Sma-1-1845 | NS.000200.1    | - | 207731032 | 207730983 |
| Sma-1-1846 | NW_003037928.1 | - | 242065    | 242016    |
| Sma-1-1847 | NS.000200.1    | - | 174566018 | 174565969 |
| Sma-1-1848 | NW_003026490.1 | + | 68697     | 68746     |
| Sma-1-1849 | NS.000200.1    | + | 267700413 | 267700462 |
| Sma-1-1850 | NW_003026460.1 | - | 241257    | 241208    |
| Sma-1-1851 | NS.000200.1    | - | 170763463 | 170763414 |
| Sma-1-1852 | NW_003037814.1 | - | 125591    | 125542    |
| Sma-1-1853 | NS.000200.1    | - | 43109451  | 43109402  |
| Sma-1-1854 | NW_003037804.1 | - | 822709    | 822660    |
| Sma-1-1855 | NS.000200.1    | - | 25962729  | 25962680  |
| Sma-1-1856 | NW_003037807.1 | - | 967602    | 967553    |
| Sma-1-1857 | NW_003037848.1 | - | 350114    | 350065    |
| Sma-1-1858 | NS.000200.1    | - | 90043185  | 90043136  |
| Sma-1-1859 | NS.000200.1    | - | 31229118  | 31229069  |
| Sma-1-1860 | NW_003038145.1 | + | 361834    | 361883    |
| Sma-1-1861 | NS.000200.1    | + | 288973257 | 288973306 |
| Sma-1-1862 | NW_003038059.1 | - | 90661     | 90612     |
| Sma-1-1863 | NS.000200.1    | - | 260332733 | 260332684 |
| Sma-1-1864 | NW_003037866.1 | - | 721741    | 721692    |
| Sma-1-1865 | NW_003037866.1 | - | 719518    | 719469    |
| Sma-1-1866 | NW_003037891.1 | - | 2831817   | 2831768   |
| Sma-1-1867 | NS.000200.1    | - | 140713095 | 140713046 |
| Sma-1-1868 | NS.000200.1    | - | 112209540 | 112209491 |
| Sma-1-1869 | NS.000200.1    | - | 112207317 | 112207268 |
| Sma-1-1870 | NW_003037793.1 | - | 3810466   | 3810417   |
| Sma-1-1871 | NS.000200.1    | - | 3810466   | 3810417   |
| Sma-1-1872 | NW_003037997.1 | + | 97187     | 97236     |
| Sma-1-1873 | NS.000200.1    | + | 220908629 | 220908678 |
| Sma-1-1874 | NW_003026464.1 | + | 127322    | 127371    |
| Sma-1-1875 | NS.000200.1    | + | 203427631 | 203427680 |
| Sma-1-1876 | NW_003026488.1 | + | 103439    | 103488    |
| Sma-1-1877 | NS.000200.1    | + | 263609933 | 263609982 |
| Sma-1-1878 | NW_003038156.1 | - | 99318     | 99269     |
| Sma-1-1879 | NS.000200.1    | - | 294831431 | 294831382 |
| Sma-1-1880 | NW_003035523.1 | - | 936       | 887       |
| Sma-1-1881 | NW_003037798.1 | + | 1534037   | 1534086   |
| Sma-1-1882 | NS.000200.1    | + | 15793195  | 15793244  |

|            |                |   |           |           |
|------------|----------------|---|-----------|-----------|
| Sma-1-1883 | NS_000200.1    | - | 328339291 | 328339242 |
| Sma-1-1884 | NW_003037798.1 | + | 2052281   | 2052330   |
| Sma-1-1885 | NW_003038033.1 | - | 372829    | 372780    |
| Sma-1-1886 | NS_000200.1    | + | 16311439  | 16311488  |
| Sma-1-1887 | NS_000200.1    | - | 246352831 | 246352782 |
| Sma-1-1888 | NW_003038161.1 | + | 87603     | 87652     |
| Sma-1-1889 | NS_000200.1    | + | 297457454 | 297457503 |
| Sma-1-1890 | NW_003038013.1 | - | 329472    | 329423    |
| Sma-1-1891 | NS_000200.1    | - | 229719098 | 229719049 |
| Sma-1-1892 | NW_003038028.1 | + | 764543    | 764592    |
| Sma-1-1893 | NS_000200.1    | + | 242072117 | 242072166 |
| Sma-1-1894 | NW_003037825.1 | + | 1416870   | 1416919   |
| Sma-1-1895 | NW_003038030.1 | + | 448786    | 448835    |
| Sma-1-1896 | NS_000200.1    | + | 60546652  | 60546701  |
| Sma-1-1897 | NS_000200.1    | + | 243584653 | 243584702 |
| Sma-1-1898 | NW_003037985.1 | + | 62249     | 62298     |
| Sma-1-1899 | NW_003038489.1 | + | 78372     | 78421     |
| Sma-1-1900 | NW_003037793.1 | - | 2251263   | 2251214   |
| Sma-1-1901 | NW_003037807.1 | - | 319891    | 319842    |
| Sma-1-1902 | NW_003037809.1 | - | 2611876   | 2611827   |
| Sma-1-1903 | NW_003037815.1 | + | 362096    | 362145    |
| Sma-1-1904 | NW_003037839.1 | - | 353757    | 353708    |
| Sma-1-1905 | NW_003037860.1 | - | 451348    | 451299    |
| Sma-1-1906 | NW_003037881.1 | + | 753148    | 753197    |
| Sma-1-1907 | NW_003037912.1 | + | 1321216   | 1321265   |
| Sma-1-1908 | NW_003037923.1 | + | 206170    | 206219    |
| Sma-1-1909 | NW_003037930.1 | - | 194574    | 194525    |
| Sma-1-1910 | NW_003037943.1 | - | 1196663   | 1196614   |
| Sma-1-1911 | NW_003038016.1 | - | 484691    | 484642    |
| Sma-1-1912 | NW_003038086.1 | + | 327950    | 327999    |
| Sma-1-1913 | NW_003038119.1 | - | 184268    | 184219    |
| Sma-1-1914 | NW_003038140.1 | + | 121048    | 121097    |
| Sma-1-1915 | NS_000200.1    | + | 45625087  | 45625136  |
| Sma-1-1916 | NS_000200.1    | + | 125184939 | 125184988 |
| Sma-1-1917 | NS_000200.1    | + | 158132791 | 158132840 |
| Sma-1-1918 | NS_000200.1    | + | 171262383 | 171262432 |
| Sma-1-1919 | NS_000200.1    | + | 215189593 | 215189642 |
| Sma-1-1920 | NS_000200.1    | + | 272576543 | 272576592 |
| Sma-1-1921 | NS_000200.1    | + | 286648925 | 286648974 |
| Sma-1-1922 | NS_000200.1    | + | 333790655 | 333790704 |
| Sma-1-1923 | NS_000200.1    | - | 278091824 | 278091775 |
| Sma-1-1924 | NS_000200.1    | - | 231601228 | 231601179 |
| Sma-1-1925 | NS_000200.1    | - | 188218196 | 188218147 |
| Sma-1-1926 | NS_000200.1    | - | 176052538 | 176052489 |
| Sma-1-1927 | NS_000200.1    | - | 104194376 | 104194327 |
| Sma-1-1928 | NS_000200.1    | - | 79311907  | 79311858  |
| Sma-1-1929 | NS_000200.1    | - | 36276340  | 36276291  |
| Sma-1-1930 | NS_000200.1    | - | 30581407  | 30581358  |
| Sma-1-1931 | NS_000200.1    | - | 2251263   | 2251214   |
| Sma-1-1932 | NW_003037990.1 | - | 178630    | 178581    |
| Sma-1-1933 | NS_000200.1    | - | 217077389 | 217077340 |
| Sma-1-1934 | NW_003038008.1 | + | 264406    | 264455    |

|            |                |   |           |           |
|------------|----------------|---|-----------|-----------|
| Sma-1-1935 | NS.000200.1    | + | 225937502 | 225937551 |
| Sma-1-1936 | NW_003037800.1 | + | 1113741   | 1113790   |
| Sma-1-1937 | NS.000200.1    | + | 19743101  | 19743150  |
| Sma-1-1938 | NW_003037816.1 | - | 943565    | 943516    |
| Sma-1-1939 | NS.000200.1    | - | 47152437  | 47152388  |
| Sma-1-1940 | NW_003037853.1 | + | 781401    | 781450    |
| Sma-1-1941 | NS.000200.1    | + | 96273452  | 96273501  |
| Sma-1-1942 | NW_003037860.1 | - | 51981     | 51932     |
| Sma-1-1943 | NS.000200.1    | - | 103795009 | 103794960 |
| Sma-1-1944 | NW_003037890.1 | + | 1161141   | 1161190   |
| Sma-1-1945 | NS.000200.1    | + | 136844502 | 136844551 |
| Sma-1-1946 | NW_003037851.1 | - | 572264    | 572215    |
| Sma-1-1947 | NS.000200.1    | - | 93975574  | 93975525  |
| Sma-1-1948 | NW_003037845.1 | + | 249741    | 249790    |
| Sma-1-1949 | NS.000200.1    | + | 87251644  | 87251693  |
| Sma-1-1950 | NW_003037896.1 | + | 304180    | 304229    |
| Sma-1-1951 | NS.000200.1    | + | 143224603 | 143224652 |
| Sma-1-1952 | NW_003037801.1 | + | 484672    | 484721    |
| Sma-1-1953 | NS.000200.1    | + | 21574152  | 21574201  |
| Sma-1-1954 | NW_003038150.1 | + | 101810    | 101859    |
| Sma-1-1955 | NS.000200.1    | + | 291580548 | 291580597 |
| Sma-1-1956 | NW_003028445.1 | - | 1683      | 1634      |
| Sma-1-1957 | NW_003038260.1 | + | 190499    | 190548    |
| Sma-1-1958 | NS.000200.1    | + | 323362274 | 323362323 |
| Sma-1-1959 | NS.000200.1    | - | 369655758 | 369655709 |
| Sma-1-1960 | NW_003038163.1 | - | 213337    | 213288    |
| Sma-1-1961 | NS.000200.1    | - | 298613617 | 298613568 |
| Sma-1-1962 | NW_003037899.1 | - | 213697    | 213648    |
| Sma-1-1963 | NS.000200.1    | - | 144732808 | 144732759 |
| Sma-1-1964 | NW_003023460.1 | - | 2150      | 2101      |
| Sma-1-1965 | NW_003030217.1 | - | 1887      | 1838      |
| Sma-1-1966 | NW_003038504.1 | - | 34542     | 34493     |
| Sma-1-1967 | NW_003034557.1 | - | 8437      | 8388      |
| Sma-1-1968 | NW_003037572.1 | - | 885       | 836       |
| Sma-1-1969 | NW_003037796.1 | + | 1247309   | 1247358   |
| Sma-1-1970 | NW_003037822.1 | - | 400549    | 400500    |
| Sma-1-1971 | NW_003037823.1 | + | 680321    | 680370    |
| Sma-1-1972 | NW_003037823.1 | - | 679931    | 679882    |
| Sma-1-1973 | NW_003037824.1 | + | 503724    | 503773    |
| Sma-1-1974 | NW_003037824.1 | - | 521220    | 521171    |
| Sma-1-1975 | NW_003037866.1 | + | 1467712   | 1467761   |
| Sma-1-1976 | NW_003037880.1 | + | 351969    | 352018    |
| Sma-1-1977 | NW_003037883.1 | - | 367878    | 367829    |
| Sma-1-1978 | NW_003037889.1 | - | 1690618   | 1690569   |
| Sma-1-1979 | NW_003037908.1 | + | 4023      | 4072      |
| Sma-1-1980 | NW_003037942.1 | + | 436156    | 436205    |
| Sma-1-1981 | NW_003037973.1 | - | 311290    | 311241    |
| Sma-1-1982 | NW_003037975.1 | + | 1028129   | 1028178   |
| Sma-1-1983 | NW_003038011.1 | - | 365630    | 365581    |
| Sma-1-1984 | NW_003038024.1 | - | 126619    | 126570    |
| Sma-1-1985 | NW_003038034.1 | - | 880488    | 880439    |
| Sma-1-1986 | NW_003038240.1 | + | 141237    | 141286    |

|            |                |   |           |           |
|------------|----------------|---|-----------|-----------|
| Sma-1-1987 | NW_003026515.1 | + | 35104     | 35153     |
| Sma-1-1988 | NW_003038044.1 | - | 135993    | 135944    |
| Sma-1-1989 | NW_003038084.1 | - | 342717    | 342668    |
| Sma-1-1990 | NW_003038172.1 | + | 49301     | 49350     |
| Sma-1-1991 | NS_000200.1    | + | 9456953   | 9457002   |
| Sma-1-1992 | NS_000200.1    | + | 56596940  | 56596989  |
| Sma-1-1993 | NS_000200.1    | + | 57434664  | 57434713  |
| Sma-1-1994 | NS_000200.1    | + | 112955511 | 112955560 |
| Sma-1-1995 | NS_000200.1    | + | 124035527 | 124035576 |
| Sma-1-1996 | NS_000200.1    | + | 152477154 | 152477203 |
| Sma-1-1997 | NS_000200.1    | + | 186196064 | 186196113 |
| Sma-1-1998 | NS_000200.1    | + | 206610353 | 206610402 |
| Sma-1-1999 | NS_000200.1    | + | 290679515 | 290679564 |
| Sma-1-2000 | NS_000200.1    | + | 300722816 | 300722865 |
| Sma-1-2001 | NS_000200.1    | + | 314280168 | 314280217 |
| Sma-1-2002 | NS_000200.1    | - | 373440391 | 373440342 |
| Sma-1-2003 | NS_000200.1    | - | 372065905 | 372065856 |
| Sma-1-2004 | NS_000200.1    | - | 362367059 | 362367010 |
| Sma-1-2005 | NS_000200.1    | - | 335883074 | 335883025 |
| Sma-1-2006 | NS_000200.1    | - | 327436635 | 327436586 |
| Sma-1-2007 | NS_000200.1    | - | 271357961 | 271357912 |
| Sma-1-2008 | NS_000200.1    | - | 254760775 | 254760726 |
| Sma-1-2009 | NS_000200.1    | - | 247822244 | 247822195 |
| Sma-1-2010 | NS_000200.1    | - | 238023648 | 238023599 |
| Sma-1-2011 | NS_000200.1    | - | 227893280 | 227893231 |
| Sma-1-2012 | NS_000200.1    | - | 204293017 | 204292968 |
| Sma-1-2013 | NS_000200.1    | - | 135467108 | 135467059 |
| Sma-1-2014 | NS_000200.1    | - | 126431601 | 126431552 |
| Sma-1-2015 | NS_000200.1    | - | 57452160  | 57452111  |
| Sma-1-2016 | NS_000200.1    | - | 56596550  | 56596501  |
| Sma-1-2017 | NS_000200.1    | - | 54708555  | 54708506  |
| Sma-1-2018 | NW_003037908.1 | + | 976346    | 976396    |
| Sma-1-2019 | NS_000200.1    | + | 153449477 | 153449527 |
| Sma-1-2020 | NW_003037937.1 | + | 567977    | 568026    |
| Sma-1-2021 | NS_000200.1    | + | 181767886 | 181767935 |
| Sma-1-2022 | NW_003038261.1 | + | 131039    | 131088    |
| Sma-1-2023 | NS_000200.1    | + | 323744690 | 323744739 |
| Sma-1-2024 | NW_003037809.1 | + | 2855346   | 2855395   |
| Sma-1-2025 | NW_003037814.1 | + | 1048218   | 1048267   |
| Sma-1-2026 | NS_000200.1    | + | 36519810  | 36519859  |
| Sma-1-2027 | NS_000200.1    | + | 44032078  | 44032127  |
| Sma-1-2028 | NW_003031785.1 | - | 1293      | 1244      |
| Sma-1-2029 | NW_003037885.1 | + | 570294    | 570343    |
| Sma-1-2030 | NS_000200.1    | + | 128668241 | 128668290 |
| Sma-1-2031 | NS_000200.1    | - | 367010310 | 367010261 |
| Sma-1-2032 | NW_003037792.1 | + | 149923    | 149972    |
| Sma-1-2033 | NS_000200.1    | + | 382587267 | 382587316 |
| Sma-1-2034 | NW_003037976.1 | - | 9839      | 9790      |
| Sma-1-2035 | NS_000200.1    | - | 206624154 | 206624105 |
| Sma-1-2036 | NW_003037791.1 | + | 116584    | 116633    |
| Sma-1-2037 | NW_003037852.1 | - | 593179    | 593130    |
| Sma-1-2038 | NS_000200.1    | + | 381822012 | 381822061 |

|            |                |   |           |           |
|------------|----------------|---|-----------|-----------|
| Sma-1-2039 | NS_000200.1    | - | 94985074  | 94985025  |
| Sma-1-2040 | NW_003026460.1 | - | 86029     | 85980     |
| Sma-1-2041 | NW_003026464.1 | - | 371354    | 371305    |
| Sma-1-2042 | NS_000200.1    | - | 203671663 | 203671614 |
| Sma-1-2043 | NS_000200.1    | - | 170608235 | 170608186 |
| Sma-1-2044 | NW_003034033.1 | - | 2555      | 2506      |
| Sma-1-2045 | NW_003037890.1 | - | 1585048   | 1584999   |
| Sma-1-2046 | NW_003037932.1 | + | 110327    | 110376    |
| Sma-1-2047 | NS_000200.1    | + | 177643523 | 177643572 |
| Sma-1-2048 | NS_000200.1    | - | 363538664 | 363538615 |
| Sma-1-2049 | NS_000200.1    | - | 137268409 | 137268360 |
| Sma-1-2050 | NW_003037801.1 | - | 729947    | 729898    |
| Sma-1-2051 | NS_000200.1    | - | 21819427  | 21819378  |
| Sma-1-2052 | NW_003038058.1 | + | 409152    | 409201    |
| Sma-1-2053 | NS_000200.1    | + | 260240352 | 260240401 |
| Sma-1-2054 | NW_003038035.1 | - | 49780     | 49731     |
| Sma-1-2055 | NS_000200.1    | - | 247911272 | 247911223 |
| Sma-1-2056 | NW_003028847.1 | + | 917       | 966       |
| Sma-1-2057 | NW_003034703.1 | + | 2546      | 2595      |
| Sma-1-2058 | NS_000200.1    | + | 328230510 | 328230559 |
| Sma-1-2059 | NS_000200.1    | + | 370077423 | 370077472 |
| Sma-1-2060 | NW_003037829.1 | - | 1701309   | 1701260   |
| Sma-1-2061 | NS_000200.1    | - | 67601847  | 67601798  |
| Sma-1-2062 | NW_003037822.1 | - | 528668    | 528619    |
| Sma-1-2063 | NS_000200.1    | - | 54836674  | 54836625  |
| Sma-1-2064 | NW_003037798.1 | - | 187410    | 187361    |
| Sma-1-2065 | NS_000200.1    | - | 14446568  | 14446519  |
| Sma-1-2066 | NW_003037797.1 | + | 566005    | 566054    |
| Sma-1-2067 | NS_000200.1    | + | 10993865  | 10993914  |
| Sma-1-2068 | NW_003039127.1 | + | 711206    | 711255    |
| Sma-1-2069 | NS_000200.1    | + | 113788705 | 113788754 |
| Sma-1-2070 | NW_003038153.1 | + | 712438    | 712487    |
| Sma-1-2071 | NS_000200.1    | + | 293774487 | 293774536 |
| Sma-1-2072 | NW_003037809.1 | - | 2778994   | 2778945   |
| Sma-1-2073 | NS_000200.1    | - | 36443458  | 36443409  |
| Sma-1-2074 | NW_003037813.1 | - | 1019255   | 1019206   |
| Sma-1-2075 | NS_000200.1    | - | 42006118  | 42006069  |
| Sma-1-2076 | NW_003037816.1 | + | 857050    | 857099    |
| Sma-1-2077 | NW_003037980.1 | + | 961675    | 961724    |
| Sma-1-2078 | NS_000200.1    | + | 47065922  | 47065971  |
| Sma-1-2079 | NS_000200.1    | + | 211922537 | 211922586 |
| Sma-1-2080 | NW_003037795.1 | - | 1133162   | 1133113   |
| Sma-1-2081 | NS_000200.1    | - | 7524045   | 7523996   |
| Sma-1-2082 | NW_003024026.1 | + | 555       | 604       |
| Sma-1-2083 | NS_000200.1    | + | 344477115 | 344477164 |
| Sma-1-2084 | NW_003038034.1 | + | 336300    | 336349    |
| Sma-1-2085 | NS_000200.1    | + | 247278056 | 247278105 |
| Sma-1-2086 | NW_003026618.1 | - | 157434    | 157385    |
| Sma-1-2087 | NW_003038505.1 | - | 279958    | 279909    |
| Sma-1-2088 | NS_000200.1    | - | 336359295 | 336359246 |
| Sma-1-2089 | NS_000200.1    | - | 321912436 | 321912387 |
| Sma-1-2090 | NW_003037980.1 | - | 1306287   | 1306238   |

|            |                |   |           |           |
|------------|----------------|---|-----------|-----------|
| Sma-1-2091 | NS_000200.1    | - | 212267149 | 212267100 |
| Sma-1-2092 | NW_003037797.1 | + | 1447454   | 1447503   |
| Sma-1-2093 | NS_000200.1    | + | 11875314  | 11875363  |
| Sma-1-2094 | NW_003032891.1 | - | 402       | 353       |
| Sma-1-2095 | NW_003037849.1 | - | 944824    | 944775    |
| Sma-1-2096 | NW_003037976.1 | + | 605267    | 605316    |
| Sma-1-2097 | NW_003037976.1 | + | 606407    | 606456    |
| Sma-1-2098 | NW_003038086.1 | + | 64461     | 64510     |
| Sma-1-2099 | NS_000200.1    | + | 207219582 | 207219631 |
| Sma-1-2100 | NS_000200.1    | + | 207220722 | 207220771 |
| Sma-1-2101 | NS_000200.1    | + | 272313054 | 272313103 |
| Sma-1-2102 | NS_000200.1    | - | 350526925 | 350526876 |
| Sma-1-2103 | NS_000200.1    | - | 91921097  | 91921048  |
| Sma-1-2104 | NW_003026456.1 | + | 139637    | 139686    |
| Sma-1-2105 | NS_000200.1    | + | 58062773  | 58062822  |
| Sma-1-2106 | NW_003037918.1 | + | 2061896   | 2061945   |
| Sma-1-2107 | NS_000200.1    | + | 168628886 | 168628935 |
| Sma-1-2108 | NW_003026464.1 | + | 653408    | 653457    |
| Sma-1-2109 | NS_000200.1    | + | 203953717 | 203953766 |
| Sma-1-2110 | NW_003038035.1 | + | 198877    | 198926    |
| Sma-1-2111 | NS_000200.1    | + | 248060369 | 248060418 |
| Sma-1-2112 | NW_003038041.1 | - | 103631    | 103582    |
| Sma-1-2113 | NS_000200.1    | - | 253770913 | 253770864 |
| Sma-1-2114 | NW_003037834.1 | + | 306755    | 306804    |
| Sma-1-2115 | NS_000200.1    | + | 73467241  | 73467290  |
| Sma-1-2116 | NW_003038002.1 | - | 245490    | 245441    |
| Sma-1-2117 | NW_003037827.1 | + | 374992    | 375041    |
| Sma-1-2118 | NS_000200.1    | + | 62997133  | 62997182  |
| Sma-1-2119 | NS_000200.1    | - | 223365699 | 223365650 |
| Sma-1-2120 | NW_003026464.1 | - | 50874     | 50825     |
| Sma-1-2121 | NW_003037822.1 | + | 1521091   | 1521140   |
| Sma-1-2122 | NW_003037914.1 | - | 811240    | 811191    |
| Sma-1-2123 | NS_000200.1    | + | 55829097  | 55829146  |
| Sma-1-2124 | NS_000200.1    | - | 203351183 | 203351134 |
| Sma-1-2125 | NS_000200.1    | - | 160955490 | 160955441 |
| Sma-1-2126 | NW_003038229.1 | - | 157361    | 157311    |
| Sma-1-2127 | NS_000200.1    | - | 311274583 | 311274533 |
| Sma-1-2128 | NW_003038031.1 | + | 676548    | 676597    |
| Sma-1-2129 | NS_000200.1    | + | 244954306 | 244954355 |
| Sma-1-2130 | NW_003038114.1 | + | 148403    | 148452    |
| Sma-1-2131 | NS_000200.1    | + | 276874308 | 276874357 |
| Sma-1-2132 | NW_003037917.1 | - | 1182114   | 1182065   |
| Sma-1-2133 | NS_000200.1    | - | 166218918 | 166218869 |
| Sma-1-2134 | NW_003037803.1 | + | 467997    | 468046    |
| Sma-1-2135 | NS_000200.1    | + | 23968534  | 23968583  |
| Sma-1-2136 | NW_003038015.1 | - | 505577    | 505528    |
| Sma-1-2137 | NS_000200.1    | - | 230829067 | 230829018 |
| Sma-1-2138 | NW_003038122.1 | - | 15797     | 15748     |
| Sma-1-2139 | NS_000200.1    | - | 278535024 | 278534975 |
| Sma-1-2140 | NW_003037939.1 | + | 549434    | 549483    |
| Sma-1-2141 | NS_000200.1    | + | 183419188 | 183419237 |
| Sma-1-2142 | NW_003024494.1 | - | 584       | 535       |

|            |                |   |           |           |
|------------|----------------|---|-----------|-----------|
| Sma-1-2143 | NW_003035502.1 | - | 2508      | 2459      |
| Sma-1-2144 | NS_000200.1    | - | 348733036 | 348732987 |
| Sma-1-2145 | NS_000200.1    | - | 328297251 | 328297202 |
| Sma-1-2146 | NW_003038033.1 | - | 421245    | 421196    |
| Sma-1-2147 | NS_000200.1    | - | 246401247 | 246401198 |
| Sma-1-2148 | NW_003037848.1 | + | 934138    | 934187    |
| Sma-1-2149 | NW_003037848.1 | - | 933948    | 933899    |
| Sma-1-2150 | NS_000200.1    | + | 90627209  | 90627258  |
| Sma-1-2151 | NS_000200.1    | - | 90627019  | 90626970  |
| Sma-1-2152 | NW_003037838.1 | - | 811294    | 811245    |
| Sma-1-2153 | NS_000200.1    | - | 78809857  | 78809808  |
| Sma-1-2154 | NW_003037847.1 | - | 988413    | 988364    |
| Sma-1-2155 | NS_000200.1    | - | 89640143  | 89640094  |
| Sma-1-2156 | NW_003037864.1 | + | 69434     | 69483     |
| Sma-1-2157 | NS_000200.1    | + | 108562008 | 108562057 |
| Sma-1-2158 | NW_003037880.1 | + | 682889    | 682938    |
| Sma-1-2159 | NS_000200.1    | + | 124366447 | 124366496 |
| Sma-1-2160 | NW_003037917.1 | + | 501122    | 501171    |
| Sma-1-2161 | NS_000200.1    | + | 165537926 | 165537975 |
| Sma-1-2162 | NW_003037792.1 | + | 230665    | 230714    |
| Sma-1-2163 | NW_003037917.1 | - | 480381    | 480332    |
| Sma-1-2164 | NW_003037945.1 | - | 727187    | 727138    |
| Sma-1-2165 | NS_000200.1    | + | 382668009 | 382668058 |
| Sma-1-2166 | NS_000200.1    | - | 189829151 | 189829102 |
| Sma-1-2167 | NS_000200.1    | - | 165517185 | 165517136 |
| Sma-1-2168 | NW_003037794.1 | - | 75205     | 75156     |
| Sma-1-2169 | NW_003037841.1 | + | 1588083   | 1588132   |
| Sma-1-2170 | NW_003037846.1 | - | 661737    | 661688    |
| Sma-1-2171 | NS_000200.1    | + | 84199264  | 84199313  |
| Sma-1-2172 | NS_000200.1    | - | 88296307  | 88296258  |
| Sma-1-2173 | NS_000200.1    | - | 4254800   | 4254751   |
| Sma-1-2174 | NW_003038006.1 | + | 253123    | 253171    |
| Sma-1-2175 | NS_000200.1    | + | 225137607 | 225137655 |
| Sma-1-2176 | NW_003037943.1 | - | 942181    | 942133    |
| Sma-1-2177 | NS_000200.1    | - | 187963714 | 187963666 |
| Sma-1-2178 | NW_003037806.1 | - | 1979049   | 1979001   |
| Sma-1-2179 | NS_000200.1    | - | 30174263  | 30174215  |
| Sma-1-2180 | NW_003037917.1 | + | 1115525   | 1115573   |
| Sma-1-2181 | NS_000200.1    | + | 166152329 | 166152377 |
| Sma-1-2182 | NW_003037797.1 | + | 97320     | 97369     |
| Sma-1-2183 | NS_000200.1    | + | 10525180  | 10525229  |
| Sma-1-2184 | NW_003037809.1 | - | 578093    | 578044    |
| Sma-1-2185 | NS_000200.1    | - | 34242557  | 34242508  |
| Sma-1-2186 | NW_003027832.1 | - | 333       | 284       |
| Sma-1-2187 | NW_003037936.1 | - | 708139    | 708090    |
| Sma-1-2188 | NS_000200.1    | - | 366002354 | 366002305 |
| Sma-1-2189 | NS_000200.1    | - | 181147868 | 181147819 |
| Sma-1-2190 | NW_003038038.1 | - | 1212853   | 1212804   |
| Sma-1-2191 | NS_000200.1    | - | 253116246 | 253116197 |
| Sma-1-2192 | NW_003038113.1 | - | 2249      | 2200      |
| Sma-1-2193 | NS_000200.1    | - | 276663111 | 276663062 |
| Sma-1-2194 | NW_003037969.1 | + | 435802    | 435851    |



|            |                 |   |           |           |
|------------|-----------------|---|-----------|-----------|
| Sma-1-2195 | NS_000200.1     | + | 201041929 | 201041978 |
| Sma-1-2196 | NW_003037933.1  | - | 300662    | 300613    |
| Sma-1-2197 | NS_000200.1     | - | 178713834 | 178713785 |
| Sma-1-2198 | NW_003037981.1  | + | 284485    | 284534    |
| Sma-1-2199 | NS_000200.1     | + | 212682353 | 212682402 |
| Sma-1-2200 | NW_003021009.1  | + | 102       | 151       |
| Sma-1-2201 | NS_000200.1     | + | 367773667 | 367773716 |
| Sma-1-2202 | NW_003039058.1  | - | 1933      | 1884      |
| Sma-1-2203 | NW_003037841.1  | + | 1076927   | 1076976   |
| Sma-1-2204 | NS_000200.1     | + | 83688108  | 83688157  |
| Sma-1-2205 | NS_000200.1     | - | 359474196 | 359474147 |
| Sma-1-2206 | NW_003037793.1  | + | 869260    | 869309    |
| Sma-1-2207 | NS_000200.1     | + | 869260    | 869309    |
| Sma-1-2208 | NW_003037831.1  | + | 979076    | 979125    |
| Sma-1-2209 | NS_000200.1     | + | 70428378  | 70428427  |
| Sma-1-2210 | NW_003037900.1  | + | 124591    | 124640    |
| Sma-1-2211 | NS_000200.1     | + | 145253457 | 145253506 |
| Sma-1-2212 | NW_003037838.1  | + | 538099    | 538148    |
| Sma-1-2213 | NS_000200.1     | + | 78536662  | 78536711  |
| Sma-1-2214 | NW_003037837.1  | - | 432158    | 432109    |
| Sma-1-2215 | NS_000200.1     | - | 77238016  | 77237967  |
| Sma-1-2216 | NW_003037901.1  | + | 395305    | 395354    |
| Sma-1-2217 | NS_000200.1     | + | 146243766 | 146243815 |
| Sma-1-2218 | NW_003037793.1  | - | 2962214   | 2962165   |
| Sma-1-2219 | NS_000200.1     | - | 2962214   | 2962165   |
| Sma-1-2220 | NW_003026469.1  | + | 142681    | 142730    |
| Sma-1-2221 | NS_000200.1     | + | 217764340 | 217764389 |
| Sma-1-2222 | NW_003037962.1  | + | 320434    | 320483    |
| Sma-1-2223 | NS_000200.1     | + | 196397277 | 196397326 |
| Sma-1-2224 | NW_003038249.1  | - | 275301    | 275252    |
| Sma-1-2225 | NS_000200.1     | - | 316957554 | 316957505 |
| Sma-1-2226 | NW_003020333.1  | - | 61        | 12        |
| Sma-1-2227 | NS_000200.1     | - | 354921700 | 354921651 |
| Sma-1-2228 | NW_003031384.1  | - | 285       | 236       |
| Sma-1-2229 | NS_000200.1     | - | 345864385 | 345864336 |
| Sma-1-2230 | NW_003037804.1  | - | 797074    | 797025    |
| Sma-1-2231 | NS_000200.1     | - | 25937094  | 25937045  |
| Sma-1-2232 | NW_003037891.1  | - | 947222    | 947173    |
| Sma-1-2233 | NS_000200.1     | - | 138828500 | 138828451 |
| Sma-1-2234 | NW_0030388037.1 | - | 1699945   | 1699896   |
| Sma-1-2235 | NS_000200.1     | - | 251855354 | 251855305 |
| Sma-1-2236 | NW_003037854.1  | + | 1499350   | 1499399   |
| Sma-1-2237 | NS_000200.1     | + | 98403771  | 98403820  |
| Sma-1-2238 | NW_003038234.1  | + | 152288    | 152337    |
| Sma-1-2239 | NS_000200.1     | + | 312989057 | 312989106 |
| Sma-1-2240 | NW_0030388068.1 | + | 225910    | 225959    |
| Sma-1-2241 | NS_000200.1     | + | 263293118 | 263293167 |
| Sma-1-2242 | NW_003037849.1  | + | 611958    | 612007    |
| Sma-1-2243 | NS_000200.1     | + | 91588231  | 91588280  |
| Sma-1-2244 | NW_003038261.1  | - | 105044    | 104995    |
| Sma-1-2245 | NS_000200.1     | - | 323718695 | 323718646 |
| Sma-1-2246 | NW_003037793.1  | + | 2846112   | 2846161   |

|            |                |   |           |           |
|------------|----------------|---|-----------|-----------|
| Sma-1-2247 | NW_003037793.1 | - | 2845707   | 2845658   |
| Sma-1-2248 | NS_000200.1    | + | 2846112   | 2846161   |
| Sma-1-2249 | NS_000200.1    | - | 2845707   | 2845658   |
| Sma-1-2250 | NW_003037981.1 | - | 608968    | 608919    |
| Sma-1-2251 | NS_000200.1    | - | 213006836 | 213006787 |
| Sma-1-2252 | NW_003038251.1 | + | 496125    | 496173    |
| Sma-1-2253 | NS_000200.1    | + | 318827897 | 318827945 |
| Sma-1-2254 | NW_003038211.1 | + | 76686     | 76734     |
| Sma-1-2255 | NS_000200.1    | + | 306096756 | 306096804 |
| Sma-1-2256 | NW_003026578.1 | - | 36171     | 36122     |
| Sma-1-2257 | NW_003037911.1 | + | 26114     | 26163     |
| Sma-1-2258 | NS_000200.1    | + | 155813467 | 155813516 |
| Sma-1-2259 | NS_000200.1    | - | 302753842 | 302753793 |
| Sma-1-2260 | NW_003037954.1 | - | 270739    | 270690    |
| Sma-1-2261 | NS_000200.1    | - | 193500361 | 193500312 |
| Sma-1-2262 | NW_003038032.1 | + | 255798    | 255847    |
| Sma-1-2263 | NS_000200.1    | + | 245414958 | 245415007 |
| Sma-1-2264 | NW_003026557.1 | + | 56438     | 56487     |
| Sma-1-2265 | NS_000200.1    | + | 301044481 | 301044530 |
| Sma-1-2266 | NW_003037956.1 | - | 96662     | 96613     |
| Sma-1-2267 | NS_000200.1    | - | 194153117 | 194153068 |
| Sma-1-2268 | NW_003037886.1 | + | 915252    | 915301    |
| Sma-1-2269 | NS_000200.1    | + | 130170819 | 130170868 |
| Sma-1-2270 | NW_003037822.1 | + | 672564    | 672613    |
| Sma-1-2271 | NS_000200.1    | + | 54980570  | 54980619  |
| Sma-1-2272 | NW_003038251.1 | + | 60989     | 61038     |
| Sma-1-2273 | NS_000200.1    | + | 318392761 | 318392810 |
| Sma-1-2274 | NW_003037814.1 | - | 1610542   | 1610493   |
| Sma-1-2275 | NS_000200.1    | - | 44594402  | 44594353  |
| Sma-1-2276 | NW_003037827.1 | - | 1820187   | 1820138   |
| Sma-1-2277 | NS_000200.1    | - | 64442328  | 64442279  |
| Sma-1-2278 | NW_003037810.1 | + | 444962    | 445011    |
| Sma-1-2279 | NS_000200.1    | + | 37049484  | 37049533  |
| Sma-1-2280 | NW_003031858.1 | - | 406       | 357       |
| Sma-1-2281 | NS_000200.1    | - | 367156902 | 367156853 |
| Sma-1-2282 | NW_003037862.1 | + | 992320    | 992369    |
| Sma-1-2283 | NS_000200.1    | + | 106643981 | 106644030 |
| Sma-1-2284 | NW_003026597.1 | + | 122283    | 122332    |
| Sma-1-2285 | NS_000200.1    | + | 305743469 | 305743518 |
| Sma-1-2286 | NW_003037793.1 | + | 2417943   | 2417992   |
| Sma-1-2287 | NS_000200.1    | + | 2417943   | 2417992   |
| Sma-1-2288 | NW_003037792.1 | - | 378446    | 378397    |
| Sma-1-2289 | NS_000200.1    | - | 382815790 | 382815741 |
| Sma-1-2290 | NW_003037803.1 | - | 1007699   | 1007650   |
| Sma-1-2291 | NS_000200.1    | - | 24508236  | 24508187  |
| Sma-1-2292 | NW_003037935.1 | - | 514441    | 514392    |
| Sma-1-2293 | NS_000200.1    | - | 179930976 | 179930927 |
| Sma-1-2294 | NW_003037909.1 | + | 812695    | 812744    |
| Sma-1-2295 | NS_000200.1    | + | 154354344 | 154354393 |
| Sma-1-2296 | NW_003038249.1 | - | 306899    | 306850    |
| Sma-1-2297 | NS_000200.1    | - | 316989152 | 316989103 |
| Sma-1-2298 | NW_003037823.1 | + | 226016    | 226065    |

|            |                 |   |           |           |
|------------|-----------------|---|-----------|-----------|
| Sma-1-2299 | NS_000200.1     | + | 56142635  | 56142684  |
| Sma-1-2300 | NW_003038508.1  | - | 61897     | 61848     |
| Sma-1-2301 | NW_003035642.1  | + | 22084     | 22133     |
| Sma-1-2302 | NS_000200.1     | + | 330279760 | 330279809 |
| Sma-1-2303 | NS_000200.1     | - | 337168865 | 337168816 |
| Sma-1-2304 | NW_003037861.1  | + | 290258    | 290307    |
| Sma-1-2305 | NS_000200.1     | + | 105066712 | 105066761 |
| Sma-1-2306 | NW_003030610.1  | - | 1401      | 1352      |
| Sma-1-2307 | NS_000200.1     | - | 366573120 | 366573071 |
| Sma-1-2308 | NW_003037794.1  | + | 501511    | 501560    |
| Sma-1-2309 | NS_000200.1     | + | 4681106   | 4681155   |
| Sma-1-2310 | NW_003038805.1  | + | 68783     | 68832     |
| Sma-1-2311 | NS_000200.1     | + | 271758876 | 271758925 |
| Sma-1-2312 | NW_003037909.1  | - | 646390    | 646341    |
| Sma-1-2313 | NS_000200.1     | - | 154188039 | 154187990 |
| Sma-1-2314 | NW_003026495.1  | + | 13731     | 13780     |
| Sma-1-2315 | NS_000200.1     | + | 274339145 | 274339194 |
| Sma-1-2316 | NW_003037824.1  | + | 144128    | 144177    |
| Sma-1-2317 | NS_000200.1     | + | 57075068  | 57075117  |
| Sma-1-2318 | NW_003038027.1  | + | 305894    | 305943    |
| Sma-1-2319 | NS_000200.1     | + | 240676608 | 240676657 |
| Sma-1-2320 | NW_003037793.1  | - | 3086874   | 3086825   |
| Sma-1-2321 | NS_000200.1     | - | 3086874   | 3086825   |
| Sma-1-2322 | NW_003037895.1  | - | 290492    | 290443    |
| Sma-1-2323 | NS_000200.1     | - | 142736694 | 142736645 |
| Sma-1-2324 | NW_003037823.1  | + | 7547      | 7596      |
| Sma-1-2325 | NS_000200.1     | + | 55924166  | 55924215  |
| Sma-1-2326 | NW_003037932.1  | + | 574887    | 574936    |
| Sma-1-2327 | NS_000200.1     | + | 178108083 | 178108132 |
| Sma-1-2328 | NW_003037977.1  | + | 643997    | 644046    |
| Sma-1-2329 | NS_000200.1     | + | 208930017 | 208930066 |
| Sma-1-2330 | NW_003037894.1  | + | 453835    | 453884    |
| Sma-1-2331 | NS_000200.1     | + | 142350408 | 142350457 |
| Sma-1-2332 | NW_003026503.1  | + | 21030     | 21079     |
| Sma-1-2333 | NS_000200.1     | + | 276584205 | 276584254 |
| Sma-1-2334 | NW_003037841.1  | - | 2006503   | 2006454   |
| Sma-1-2335 | NS_000200.1     | - | 84617684  | 84617635  |
| Sma-1-2336 | NW_003037795.1  | + | 611290    | 611339    |
| Sma-1-2337 | NS_000200.1     | + | 7002173   | 7002222   |
| Sma-1-2338 | NW_0030388028.1 | - | 690411    | 690362    |
| Sma-1-2339 | NS_000200.1     | - | 241997985 | 241997936 |
| Sma-1-2340 | NW_003038250.1  | + | 115043    | 115092    |
| Sma-1-2341 | NS_000200.1     | + | 318167720 | 318167769 |
| Sma-1-2342 | NW_003039053.1  | - | 107       | 58        |
| Sma-1-2343 | NS_000200.1     | - | 359338339 | 359338290 |
| Sma-1-2344 | NW_003031567.1  | - | 670       | 621       |
| Sma-1-2345 | NW_003038031.1  | + | 709998    | 710047    |
| Sma-1-2346 | NS_000200.1     | + | 244987756 | 244987805 |
| Sma-1-2347 | NS_000200.1     | - | 350202865 | 350202816 |
| Sma-1-2348 | NW_003037844.1  | + | 90083     | 90132     |
| Sma-1-2349 | NS_000200.1     | + | 86273529  | 86273578  |
| Sma-1-2350 | NW_003038244.1  | + | 146878    | 146927    |

|            |                |   |           |           |
|------------|----------------|---|-----------|-----------|
| Sma-1-2351 | NS_000200.1    | + | 315292083 | 315292132 |
| Sma-1-2352 | NW_003037914.1 | - | 1483468   | 1483419   |
| Sma-1-2353 | NS_000200.1    | - | 161627718 | 161627669 |
| Sma-1-2354 | NW_003037914.1 | - | 1481276   | 1481227   |
| Sma-1-2355 | NS_000200.1    | - | 161625526 | 161625477 |
| Sma-1-2356 | NW_003037859.1 | - | 369238    | 369189    |
| Sma-1-2357 | NS_000200.1    | - | 103048079 | 103048030 |
| Sma-1-2358 | NW_003038069.1 | + | 69150     | 69199     |
| Sma-1-2359 | NS_000200.1    | + | 263912556 | 263912605 |
| Sma-1-2360 | NW_003037909.1 | - | 465732    | 465683    |
| Sma-1-2361 | NS_000200.1    | - | 154007381 | 154007332 |
| Sma-1-2362 | NW_003037982.1 | - | 1343309   | 1343260   |
| Sma-1-2363 | NS_000200.1    | - | 215002504 | 215002455 |
| Sma-1-2364 | NW_003038079.1 | - | 95557     | 95508     |
| Sma-1-2365 | NS_000200.1    | - | 268225545 | 268225496 |
| Sma-1-2366 | NW_003037962.1 | + | 69075     | 69124     |
| Sma-1-2367 | NS_000200.1    | + | 196145918 | 196145967 |
| Sma-1-2368 | NW_003038238.1 | + | 35314     | 35363     |
| Sma-1-2369 | NS_000200.1    | + | 313642095 | 313642144 |
| Sma-1-2370 | NW_003038251.1 | + | 102168    | 102217    |
| Sma-1-2371 | NS_000200.1    | + | 318433940 | 318433989 |
| Sma-1-2372 | NW_003037797.1 | - | 2585270   | 2585221   |
| Sma-1-2373 | NS_000200.1    | - | 13013130  | 13013081  |
| Sma-1-2374 | NW_003037824.1 | - | 757824    | 757775    |
| Sma-1-2375 | NS_000200.1    | - | 57688764  | 57688715  |
| Sma-1-2376 | NW_003037938.1 | - | 685235    | 685186    |
| Sma-1-2377 | NS_000200.1    | - | 182722348 | 182722299 |
| Sma-1-2378 | NW_003037977.1 | + | 616780    | 616829    |
| Sma-1-2379 | NS_000200.1    | + | 208902800 | 208902849 |
| Sma-1-2380 | NW_003038029.1 | + | 299650    | 299699    |
| Sma-1-2381 | NS_000200.1    | + | 242500551 | 242500600 |
| Sma-1-2382 | NW_003037860.1 | - | 328739    | 328690    |
| Sma-1-2383 | NS_000200.1    | - | 104071767 | 104071718 |
| Sma-1-2384 | NW_003037795.1 | - | 630192    | 630143    |
| Sma-1-2385 | NS_000200.1    | - | 7021075   | 7021026   |
| Sma-1-2386 | NW_003037915.1 | - | 710234    | 710185    |
| Sma-1-2387 | NS_000200.1    | - | 162610220 | 162610171 |
| Sma-1-2388 | NW_003038251.1 | - | 262948    | 262899    |
| Sma-1-2389 | NS_000200.1    | - | 318594720 | 318594671 |
| Sma-1-2390 | NW_003037827.1 | + | 1844928   | 1844977   |
| Sma-1-2391 | NS_000200.1    | + | 64467069  | 64467118  |
| Sma-1-2392 | NW_003037796.1 | - | 68319     | 68270     |
| Sma-1-2393 | NS_000200.1    | - | 8277963   | 8277914   |
| Sma-1-2394 | NW_003029653.1 | + | 1335      | 1384      |
| Sma-1-2395 | NS_000200.1    | + | 366356352 | 366356401 |
| Sma-1-2396 | NW_003039127.1 | + | 574937    | 574986    |
| Sma-1-2397 | NS_000200.1    | + | 113652436 | 113652485 |
| Sma-1-2398 | NW_003037897.1 | + | 105573    | 105622    |
| Sma-1-2399 | NS_000200.1    | + | 143587949 | 143587998 |
| Sma-1-2400 | NW_003037797.1 | - | 2555815   | 2555766   |
| Sma-1-2401 | NS_000200.1    | - | 12983675  | 12983626  |
| Sma-1-2402 | NW_003037797.1 | - | 3142014   | 3141964   |

|            |                |   |           |           |
|------------|----------------|---|-----------|-----------|
| Sma-1-2403 | NS_000200.1    | - | 13569874  | 13569824  |
| Sma-1-2404 | NW_003037813.1 | - | 1587178   | 1587129   |
| Sma-1-2405 | NS_000200.1    | - | 42574041  | 42573992  |
| Sma-1-2406 | NW_003038013.1 | - | 280911    | 280860    |
| Sma-1-2407 | NS_000200.1    | - | 229670537 | 229670486 |
| Sma-1-2408 | NW_003037814.1 | - | 1658488   | 1658439   |
| Sma-1-2409 | NS_000200.1    | - | 44642348  | 44642299  |
| Sma-1-2410 | NW_003032155.1 | - | 51720     | 51671     |
| Sma-1-2411 | NS_000200.1    | - | 379602811 | 379602762 |
| Sma-1-2412 | NW_003038118.1 | - | 127744    | 127695    |
| Sma-1-2413 | NS_000200.1    | - | 277691871 | 277691822 |
| Sma-1-2414 | NW_003026507.1 | + | 243996    | 244045    |
| Sma-1-2415 | NS_000200.1    | + | 279904147 | 279904196 |
| Sma-1-2416 | NW_003038049.1 | + | 17367     | 17416     |
| Sma-1-2417 | NS_000200.1    | + | 255992894 | 255992943 |
| Sma-1-2418 | NW_003032160.1 | + | 252363    | 252412    |
| Sma-1-2419 | NS_000200.1    | + | 381260449 | 381260498 |
| Sma-1-2420 | NW_003037841.1 | + | 1518005   | 1518054   |
| Sma-1-2421 | NS_000200.1    | + | 84129186  | 84129235  |
| Sma-1-2422 | NW_003037886.1 | - | 858494    | 858445    |
| Sma-1-2423 | NS_000200.1    | - | 130114061 | 130114012 |
| Sma-1-2424 | NW_003037822.1 | + | 324928    | 324977    |
| Sma-1-2425 | NS_000200.1    | + | 54632934  | 54632983  |
| Sma-1-2426 | NW_003037893.1 | + | 497415    | 497464    |
| Sma-1-2427 | NS_000200.1    | + | 141611725 | 141611774 |
| Sma-1-2428 | NW_003029634.1 | + | 1313      | 1362      |
| Sma-1-2429 | NS_000200.1    | + | 366307616 | 366307665 |
| Sma-1-2430 | NW_003037812.1 | + | 1424021   | 1424071   |
| Sma-1-2431 | NS_000200.1    | + | 40906760  | 40906810  |
| Sma-1-2432 | NW_003037824.1 | - | 850520    | 850471    |
| Sma-1-2433 | NS_000200.1    | - | 57781460  | 57781411  |
| Sma-1-2434 | NW_003037817.1 | - | 977077    | 977028    |
| Sma-1-2435 | NS_000200.1    | - | 48359429  | 48359380  |
| Sma-1-2436 | NW_003037837.1 | - | 8419      | 8370      |
| Sma-1-2437 | NS_000200.1    | - | 76814277  | 76814228  |
| Sma-1-2438 | NW_003037932.1 | - | 315622    | 315573    |
| Sma-1-2439 | NS_000200.1    | - | 177848818 | 177848769 |
| Sma-1-2440 | NW_003038514.1 | + | 97178     | 97227     |
| Sma-1-2441 | NW_003038514.1 | - | 97967     | 97918     |
| Sma-1-2442 | NS_000200.1    | + | 339721717 | 339721766 |
| Sma-1-2443 | NS_000200.1    | - | 339722506 | 339722457 |
| Sma-1-2444 | NW_003038032.1 | - | 176791    | 176742    |
| Sma-1-2445 | NS_000200.1    | - | 245335951 | 245335902 |
| Sma-1-2446 | NW_003037846.1 | - | 202881    | 202832    |
| Sma-1-2447 | NS_000200.1    | - | 87837451  | 87837402  |
| Sma-1-2448 | NW_003037891.1 | + | 2065821   | 2065870   |
| Sma-1-2449 | NS_000200.1    | + | 139947099 | 139947148 |
| Sma-1-2450 | NW_003038008.1 | + | 397218    | 397267    |
| Sma-1-2451 | NS_000200.1    | + | 226070314 | 226070363 |
| Sma-1-2452 | NW_003037810.1 | + | 175036    | 175085    |
| Sma-1-2453 | NS_000200.1    | + | 36779558  | 36779607  |
| Sma-1-2454 | NW_003037864.1 | - | 369176    | 369127    |

|            |                |   |           |           |
|------------|----------------|---|-----------|-----------|
| Sma-1-2455 | NS_000200.1    | - | 108861750 | 108861701 |
| Sma-1-2456 | NW_003037953.1 | + | 55999     | 56048     |
| Sma-1-2457 | NS_000200.1    | + | 192969050 | 192969099 |
| Sma-1-2458 | NW_003038120.1 | - | 75984     | 75935     |
| Sma-1-2459 | NS_000200.1    | - | 278261207 | 278261158 |
| Sma-1-2460 | NW_003037806.1 | - | 73008     | 72959     |
| Sma-1-2461 | NS_000200.1    | - | 28268222  | 28268173  |
| Sma-1-2462 | NW_003038083.1 | + | 300324    | 300373    |
| Sma-1-2463 | NS_000200.1    | + | 270543661 | 270543710 |
| Sma-1-2464 | NW_003037964.1 | + | 543275    | 543324    |
| Sma-1-2465 | NS_000200.1    | + | 198144797 | 198144846 |
| Sma-1-2466 | NW_003037806.1 | - | 844474    | 844425    |
| Sma-1-2467 | NW_003038159.1 | + | 359723    | 359772    |
| Sma-1-2468 | NS_000200.1    | + | 296747744 | 296747793 |
| Sma-1-2469 | NS_000200.1    | - | 29039688  | 29039639  |
| Sma-1-2470 | NW_003037914.1 | - | 753930    | 753881    |
| Sma-1-2471 | NS_000200.1    | - | 160898180 | 160898131 |
| Sma-1-2472 | NW_003037910.1 | - | 512831    | 512782    |
| Sma-1-2473 | NS_000200.1    | - | 155024806 | 155024757 |
| Sma-1-2474 | NW_003037865.1 | + | 452238    | 452287    |
| Sma-1-2475 | NS_000200.1    | + | 110874157 | 110874206 |
| Sma-1-2476 | NW_003026581.1 | - | 24305     | 24255     |
| Sma-1-2477 | NS_000200.1    | - | 302854293 | 302854243 |
| Sma-1-2478 | NW_003037910.1 | + | 726997    | 727046    |
| Sma-1-2479 | NS_000200.1    | + | 155238972 | 155239021 |
| Sma-1-2480 | NW_003037822.1 | - | 1095803   | 1095754   |
| Sma-1-2481 | NS_000200.1    | - | 55403809  | 55403760  |
| Sma-1-2482 | NW_003037846.1 | + | 329356    | 329405    |
| Sma-1-2483 | NS_000200.1    | + | 87963926  | 87963975  |
| Sma-1-2484 | NW_003037809.1 | + | 654316    | 654365    |
| Sma-1-2485 | NS_000200.1    | + | 34318780  | 34318829  |
| Sma-1-2486 | NW_003038114.1 | + | 171214    | 171263    |
| Sma-1-2487 | NS_000200.1    | + | 276897119 | 276897168 |
| Sma-1-2488 | NW_003037916.1 | + | 1314507   | 1314556   |
| Sma-1-2489 | NS_000200.1    | + | 164507918 | 164507967 |
| Sma-1-2490 | NW_003039129.1 | - | 149788    | 149739    |
| Sma-1-2491 | NS_000200.1    | - | 229104596 | 229104547 |
| Sma-1-2492 | NW_003038033.1 | - | 385960    | 385911    |
| Sma-1-2493 | NS_000200.1    | - | 246365962 | 246365913 |
| Sma-1-2494 | NW_003037917.1 | - | 488697    | 488648    |
| Sma-1-2495 | NS_000200.1    | - | 165525501 | 165525452 |
| Sma-1-2496 | NW_003038161.1 | - | 68407     | 68358     |
| Sma-1-2497 | NS_000200.1    | - | 297438258 | 297438209 |
| Sma-1-2498 | NW_003037948.1 | - | 158253    | 158204    |
| Sma-1-2499 | NS_000200.1    | - | 192178197 | 192178148 |
| Sma-1-2500 | NW_003037821.1 | - | 258990    | 258941    |
| Sma-1-2501 | NS_000200.1    | - | 53403474  | 53403425  |
| Sma-1-2502 | NW_003034945.1 | - | 5266      | 5217      |
| Sma-1-2503 | NW_003026463.1 | - | 72026     | 71977     |
| Sma-1-2504 | NW_003037854.1 | + | 1486524   | 1486573   |
| Sma-1-2505 | NS_000200.1    | + | 98390945  | 98390994  |
| Sma-1-2506 | NS_000200.1    | - | 351060495 | 351060446 |

|            |                |   |           |           |
|------------|----------------|---|-----------|-----------|
| Sma-1-2507 | NS_000200.1    | - | 198687396 | 198687347 |
| Sma-1-2508 | NW_003037946.1 | + | 803037    | 803086    |
| Sma-1-2509 | NS_000200.1    | + | 191496897 | 191496946 |
| Sma-1-2510 | NW_003035301.1 | - | 753       | 704       |
| Sma-1-2511 | NW_003037876.1 | - | 166847    | 166798    |
| Sma-1-2512 | NS_000200.1    | - | 370973675 | 370973626 |
| Sma-1-2513 | NS_000200.1    | - | 120712483 | 120712434 |
| Sma-1-2514 | NW_003037886.1 | + | 1106855   | 1106904   |
| Sma-1-2515 | NS_000200.1    | + | 130362422 | 130362471 |
| Sma-1-2516 | NW_003037821.1 | + | 106109    | 106158    |
| Sma-1-2517 | NS_000200.1    | + | 53250593  | 53250642  |
| Sma-1-2518 | NW_003026481.1 | + | 128860    | 128909    |
| Sma-1-2519 | NS_000200.1    | + | 255528844 | 255528893 |
| Sma-1-2520 | NW_003037820.1 | - | 297736    | 297687    |
| Sma-1-2521 | NS_000200.1    | - | 52570718  | 52570669  |
| Sma-1-2522 | NW_003038143.1 | + | 474786    | 474835    |
| Sma-1-2523 | NS_000200.1    | + | 288234278 | 288234327 |
| Sma-1-2524 | NW_003037797.1 | - | 1489802   | 1489753   |
| Sma-1-2525 | NS_000200.1    | - | 11917662  | 11917613  |
| Sma-1-2526 | NW_003038475.1 | - | 44719     | 44670     |
| Sma-1-2527 | NS_000200.1    | - | 332361002 | 332360953 |
| Sma-1-2528 | NW_003037935.1 | + | 246807    | 246856    |
| Sma-1-2529 | NS_000200.1    | + | 179663342 | 179663391 |
| Sma-1-2530 | NW_003026602.1 | + | 36165     | 36214     |
| Sma-1-2531 | NS_000200.1    | + | 306956148 | 306956197 |
| Sma-1-2532 | NW_003037797.1 | - | 3763110   | 3763061   |
| Sma-1-2533 | NS_000200.1    | - | 14190970  | 14190921  |
| Sma-1-2534 | NW_003037909.1 | + | 368067    | 368116    |
| Sma-1-2535 | NS_000200.1    | + | 153909716 | 153909765 |
| Sma-1-2536 | NW_003038084.1 | - | 155684    | 155635    |
| Sma-1-2537 | NS_000200.1    | - | 271170928 | 271170879 |
| Sma-1-2538 | NW_003035618.1 | + | 13        | 62        |
| Sma-1-2539 | NS_000200.1    | + | 329412302 | 329412351 |
| Sma-1-2540 | NW_003037978.1 | - | 201454    | 201405    |
| Sma-1-2541 | NS_000200.1    | - | 209469464 | 209469415 |
| Sma-1-2542 | NW_003026476.1 | - | 90886     | 90837     |
| Sma-1-2543 | NS_000200.1    | - | 253639656 | 253639607 |
| Sma-1-2544 | NW_003037793.1 | - | 3061375   | 3061326   |
| Sma-1-2545 | NS_000200.1    | - | 3061375   | 3061326   |
| Sma-1-2546 | NW_003038131.1 | - | 359160    | 359111    |
| Sma-1-2547 | NS_000200.1    | - | 282321004 | 282320955 |
| Sma-1-2548 | NW_003038142.1 | - | 284357    | 284308    |
| Sma-1-2549 | NS_000200.1    | - | 287494793 | 287494744 |
| Sma-1-2550 | NW_003037807.1 | + | 1208874   | 1208923   |
| Sma-1-2551 | NS_000200.1    | + | 31470390  | 31470439  |
| Sma-1-2552 | NW_003020641.1 | - | 429       | 380       |
| Sma-1-2553 | NS_000200.1    | - | 360516105 | 360516056 |
| Sma-1-2554 | NW_003035682.1 | + | 18691     | 18740     |
| Sma-1-2555 | NS_000200.1    | + | 332640744 | 332640793 |
| Sma-1-2556 | NW_003037906.1 | + | 147761    | 147810    |
| Sma-1-2557 | NS_000200.1    | + | 150455540 | 150455589 |
| Sma-1-2558 | NW_003038005.1 | - | 431236    | 431187    |

|            |                |   |           |           |
|------------|----------------|---|-----------|-----------|
| Sma-1-2559 | NS_000200.1    | - | 224837190 | 224837141 |
| Sma-1-2560 | NW_003038261.1 | - | 283089    | 283040    |
| Sma-1-2561 | NS_000200.1    | - | 323896740 | 323896691 |
| Sma-1-2562 | NW_003035781.1 | - | 983       | 934       |
| Sma-1-2563 | NS_000200.1    | - | 364075797 | 364075748 |
| Sma-1-2564 | NW_003038261.1 | - | 322004    | 321955    |
| Sma-1-2565 | NS_000200.1    | - | 323935655 | 323935606 |
| Sma-1-2566 | NW_003038034.1 | - | 336909    | 336860    |
| Sma-1-2567 | NS_000200.1    | - | 247278665 | 247278616 |
| Sma-1-2568 | NW_003037859.1 | - | 439613    | 439564    |
| Sma-1-2569 | NS_000200.1    | - | 103118454 | 103118405 |
| Sma-1-2570 | NW_003037797.1 | + | 3801284   | 3801333   |
| Sma-1-2571 | NS_000200.1    | + | 14229144  | 14229193  |
| Sma-1-2572 | NW_003038034.1 | + | 386996    | 387045    |
| Sma-1-2573 | NS_000200.1    | + | 247328752 | 247328801 |
| Sma-1-2574 | NW_003037912.1 | + | 1546020   | 1546069   |
| Sma-1-2575 | NS_000200.1    | + | 158357595 | 158357644 |
| Sma-1-2576 | NW_003037937.1 | - | 650368    | 650319    |
| Sma-1-2577 | NS_000200.1    | - | 181850277 | 181850228 |
| Sma-1-2578 | NW_003037871.1 | - | 19810     | 19761     |
| Sma-1-2579 | NS_000200.1    | - | 117467548 | 117467499 |
| Sma-1-2580 | NW_003037912.1 | + | 1674299   | 1674348   |
| Sma-1-2581 | NS_000200.1    | + | 158485874 | 158485923 |
| Sma-1-2582 | NW_003038508.1 | - | 43990     | 43941     |
| Sma-1-2583 | NS_000200.1    | - | 337150958 | 337150909 |
| Sma-1-2584 | NW_003037972.1 | + | 86093     | 86142     |
| Sma-1-2585 | NS_000200.1    | + | 202561797 | 202561846 |
| Sma-1-2586 | NW_003035870.1 | + | 70417     | 70467     |
| Sma-1-2587 | NS_000200.1    | + | 335435706 | 335435756 |
| Sma-1-2588 | NW_003038239.1 | + | 283184    | 283233    |
| Sma-1-2589 | NS_000200.1    | + | 314123966 | 314124015 |
| Sma-1-2590 | NW_003037871.1 | - | 410425    | 410376    |
| Sma-1-2591 | NS_000200.1    | - | 117858163 | 117858114 |
| Sma-1-2592 | NW_003026472.1 | + | 220146    | 220195    |
| Sma-1-2593 | NS_000200.1    | + | 236632138 | 236632187 |
| Sma-1-2594 | NW_003037905.1 | - | 897178    | 897129    |
| Sma-1-2595 | NS_000200.1    | - | 150166190 | 150166141 |
| Sma-1-2596 | NW_003035880.1 | - | 112784    | 112735    |
| Sma-1-2597 | NS_000200.1    | - | 339353848 | 339353799 |
| Sma-1-2598 | NW_003035880.1 | - | 187365    | 187316    |
| Sma-1-2599 | NS_000200.1    | - | 339428429 | 339428380 |
| Sma-1-2600 | NW_003037889.1 | + | 1900917   | 1900966   |
| Sma-1-2601 | NS_000200.1    | + | 135677407 | 135677456 |
| Sma-1-2602 | NW_003037797.1 | - | 218156    | 218107    |
| Sma-1-2603 | NS_000200.1    | - | 10646016  | 10645967  |
| Sma-1-2604 | NW_003038035.1 | - | 428601    | 428552    |
| Sma-1-2605 | NS_000200.1    | - | 248290093 | 248290044 |
| Sma-1-2606 | NW_003038035.1 | + | 570767    | 570816    |
| Sma-1-2607 | NS_000200.1    | + | 248432259 | 248432308 |
| Sma-1-2608 | NW_003022147.1 | + | 5955      | 6004      |
| Sma-1-2609 | NS_000200.1    | + | 360806500 | 360806549 |
| Sma-1-2610 | NW_003037819.1 | - | 113709    | 113660    |



|            |                |   |           |           |
|------------|----------------|---|-----------|-----------|
| Sma-1-2611 | NS_000200.1    | - | 51201974  | 51201925  |
| Sma-1-2612 | NW_003038050.1 | + | 236143    | 236192    |
| Sma-1-2613 | NS_000200.1    | + | 256511037 | 256511086 |
| Sma-1-2614 | NW_003038386.1 | - | 3766      | 3717      |
| Sma-1-2615 | NS_000200.1    | - | 327865229 | 327865180 |
| Sma-1-2616 | NW_003038002.1 | - | 5878      | 5829      |
| Sma-1-2617 | NS_000200.1    | - | 223126087 | 223126038 |
| Sma-1-2618 | NW_003028271.1 | + | 1028      | 1077      |
| Sma-1-2619 | NS_000200.1    | + | 374437380 | 374437429 |
| Sma-1-2620 | NW_003037856.1 | + | 155099    | 155148    |
| Sma-1-2621 | NS_000200.1    | + | 99513055  | 99513104  |
| Sma-1-2622 | NW_003037819.1 | - | 1032154   | 1032105   |
| Sma-1-2623 | NS_000200.1    | - | 52120419  | 52120370  |
| Sma-1-2624 | NW_003038037.1 | - | 1089241   | 1089192   |
| Sma-1-2625 | NW_003038037.1 | - | 1087963   | 1087914   |
| Sma-1-2626 | NS_000200.1    | - | 251244650 | 251244601 |
| Sma-1-2627 | NS_000200.1    | - | 251243372 | 251243323 |
| Sma-1-2628 | NW_003037933.1 | + | 504623    | 504672    |
| Sma-1-2629 | NS_000200.1    | + | 178917795 | 178917844 |
| Sma-1-2630 | NW_003037853.1 | - | 321091    | 321042    |
| Sma-1-2631 | NS_000200.1    | - | 95813142  | 95813093  |
| Sma-1-2632 | NW_003038086.1 | - | 661340    | 661291    |
| Sma-1-2633 | NS_000200.1    | - | 272909933 | 272909884 |
| Sma-1-2634 | NW_003037943.1 | - | 746399    | 746350    |
| Sma-1-2635 | NS_000200.1    | - | 187767932 | 187767883 |
| Sma-1-2636 | NW_003037884.1 | + | 882398    | 882447    |
| Sma-1-2637 | NS_000200.1    | + | 127662063 | 127662112 |
| Sma-1-2638 | NW_003037809.1 | - | 542221    | 542172    |
| Sma-1-2639 | NS_000200.1    | - | 34206685  | 34206636  |
| Sma-1-2640 | NW_003037830.1 | + | 698055    | 698104    |
| Sma-1-2641 | NS_000200.1    | + | 68588426  | 68588475  |
| Sma-1-2642 | NW_003038452.1 | + | 1842      | 1891      |
| Sma-1-2643 | NS_000200.1    | + | 330579483 | 330579532 |
| Sma-1-2644 | NW_003037796.1 | + | 2003618   | 2003667   |
| Sma-1-2645 | NS_000200.1    | + | 10213262  | 10213311  |
| Sma-1-2646 | NW_003037838.1 | - | 190721    | 190672    |
| Sma-1-2647 | NS_000200.1    | - | 78189284  | 78189235  |
| Sma-1-2648 | NW_003037826.1 | - | 530061    | 530012    |
| Sma-1-2649 | NS_000200.1    | - | 61529577  | 61529528  |
| Sma-1-2650 | NW_003026471.1 | + | 108780    | 108829    |
| Sma-1-2651 | NS_000200.1    | + | 222221013 | 222221062 |
| Sma-1-2652 | NW_003038141.1 | - | 101066    | 101017    |
| Sma-1-2653 | NS_000200.1    | - | 286991045 | 286990996 |
| Sma-1-2654 | NW_003037816.1 | - | 678299    | 678250    |
| Sma-1-2655 | NS_000200.1    | - | 46887171  | 46887122  |
| Sma-1-2656 | NW_003037813.1 | - | 1966919   | 1966870   |
| Sma-1-2657 | NS_000200.1    | - | 42953782  | 42953733  |
| Sma-1-2658 | NW_003037847.1 | - | 872472    | 872423    |
| Sma-1-2659 | NS_000200.1    | - | 89524202  | 89524153  |
| Sma-1-2660 | NW_003038000.1 | + | 102498    | 102547    |
| Sma-1-2661 | NS_000200.1    | + | 222573276 | 222573325 |
| Sma-1-2662 | NW_003026470.1 | + | 84290     | 84339     |

|            |                |   |           |           |
|------------|----------------|---|-----------|-----------|
| Sma-1-2663 | NS_000200.1    | + | 219208259 | 219208308 |
| Sma-1-2664 | NW_003036362.1 | + | 1651      | 1700      |
| Sma-1-2665 | NS_000200.1    | + | 359709267 | 359709316 |
| Sma-1-2666 | NW_003037942.1 | + | 829741    | 829790    |
| Sma-1-2667 | NS_000200.1    | + | 186589649 | 186589698 |
| Sma-1-2668 | NW_003038037.1 | - | 704949    | 704900    |
| Sma-1-2669 | NS_000200.1    | - | 250860358 | 250860309 |
| Sma-1-2670 | NW_003036403.1 | - | 474       | 425       |
| Sma-1-2671 | NW_003037943.1 | - | 1154921   | 1154872   |
| Sma-1-2672 | NS_000200.1    | - | 359882180 | 359882131 |
| Sma-1-2673 | NS_000200.1    | - | 188176454 | 188176405 |
| Sma-1-2674 | NW_003037969.1 | - | 182139    | 182090    |
| Sma-1-2675 | NS_000200.1    | - | 200788266 | 200788217 |
| Sma-1-2676 | NW_003038125.1 | - | 48628     | 48579     |
| Sma-1-2677 | NS_000200.1    | - | 279485584 | 279485535 |
| Sma-1-2678 | NW_003038146.1 | + | 70976     | 71025     |
| Sma-1-2679 | NS_000200.1    | + | 289051646 | 289051695 |
| Sma-1-2680 | NW_003037884.1 | + | 1244646   | 1244695   |
| Sma-1-2681 | NS_000200.1    | + | 128024311 | 128024360 |
| Sma-1-2682 | NW_003037884.1 | + | 1100813   | 1100862   |
| Sma-1-2683 | NS_000200.1    | + | 127880478 | 127880527 |
| Sma-1-2684 | NW_003038234.1 | - | 80520     | 80471     |
| Sma-1-2685 | NS_000200.1    | - | 312917289 | 312917240 |
| Sma-1-2686 | NW_003037818.1 | - | 593819    | 593770    |
| Sma-1-2687 | NS_000200.1    | - | 49309226  | 49309177  |
| Sma-1-2688 | NW_003037797.1 | + | 970460    | 970509    |
| Sma-1-2689 | NS_000200.1    | + | 11398320  | 11398369  |
| Sma-1-2690 | NW_003037969.1 | - | 212027    | 211978    |
| Sma-1-2691 | NS_000200.1    | - | 200818154 | 200818105 |
| Sma-1-2692 | NW_003037818.1 | - | 466814    | 466765    |
| Sma-1-2693 | NS_000200.1    | - | 49182221  | 49182172  |
| Sma-1-2694 | NW_003037798.1 | - | 117571    | 117522    |
| Sma-1-2695 | NS_000200.1    | - | 14376729  | 14376680  |
| Sma-1-2696 | NW_003038038.1 | + | 1000549   | 1000598   |
| Sma-1-2697 | NS_000200.1    | + | 252903942 | 252903991 |
| Sma-1-2698 | NW_003038476.1 | - | 63672     | 63623     |
| Sma-1-2699 | NS_000200.1    | - | 332452047 | 332451998 |
| Sma-1-2700 | NW_003038476.1 | + | 74652     | 74701     |
| Sma-1-2701 | NS_000200.1    | + | 332463027 | 332463076 |
| Sma-1-2702 | NW_003038102.1 | - | 24588     | 24539     |
| Sma-1-2703 | NS_000200.1    | - | 274703534 | 274703485 |
| Sma-1-2704 | NW_003037775.1 | - | 10465     | 10416     |
| Sma-1-2705 | NS_000200.1    | - | 378639631 | 378639582 |
| Sma-1-2706 | NW_003037969.1 | + | 392590    | 392639    |
| Sma-1-2707 | NS_000200.1    | + | 200998717 | 200998766 |
| Sma-1-2708 | NW_003038038.1 | + | 1011271   | 1011320   |
| Sma-1-2709 | NS_000200.1    | + | 252914664 | 252914713 |
| Sma-1-2710 | NW_003037881.1 | + | 654787    | 654836    |
| Sma-1-2711 | NS_000200.1    | + | 125086578 | 125086627 |
| Sma-1-2712 | NW_003037941.1 | - | 971974    | 971925    |
| Sma-1-2713 | NS_000200.1    | - | 185706448 | 185706399 |
| Sma-1-2714 | NW_003037359.1 | + | 741       | 790       |

|            |                |   |           |           |
|------------|----------------|---|-----------|-----------|
| Sma-1-2715 | NW_003038120.1 | + | 21197     | 21246     |
| Sma-1-2716 | NS_000200.1    | + | 278206420 | 278206469 |
| Sma-1-2717 | NS_000200.1    | + | 366972933 | 366972982 |
| Sma-1-2718 | NW_003037836.1 | - | 540652    | 540603    |
| Sma-1-2719 | NS_000200.1    | - | 76097751  | 76097702  |
| Sma-1-2720 | NW_003027298.1 | - | 925       | 876       |
| Sma-1-2721 | NS_000200.1    | - | 353429207 | 353429158 |
| Sma-1-2722 | NW_003038137.1 | - | 7972      | 7923      |
| Sma-1-2723 | NS_000200.1    | - | 284796868 | 284796819 |
| Sma-1-2724 | NW_003038488.1 | - | 60847     | 60798     |
| Sma-1-2725 | NS_000200.1    | - | 333657904 | 333657855 |
| Sma-1-2726 | NW_003026468.1 | + | 218685    | 218734    |
| Sma-1-2727 | NS_000200.1    | + | 216412706 | 216412755 |
| Sma-1-2728 | NW_003026517.1 | - | 196412    | 196363    |
| Sma-1-2729 | NS_000200.1    | - | 299802421 | 299802372 |
| Sma-1-2730 | NW_003037940.1 | + | 422302    | 422351    |
| Sma-1-2731 | NS_000200.1    | + | 184164432 | 184164481 |
| Sma-1-2732 | NW_003037913.1 | + | 262298    | 262347    |
| Sma-1-2733 | NS_000200.1    | + | 158826049 | 158826098 |
| Sma-1-2734 | NW_003037972.1 | + | 473480    | 473529    |
| Sma-1-2735 | NS_000200.1    | + | 202949184 | 202949233 |
| Sma-1-2736 | NW_003037795.1 | + | 637910    | 637959    |
| Sma-1-2737 | NS_000200.1    | + | 7028793   | 7028842   |
| Sma-1-2738 | NW_003037879.1 | + | 136378    | 136427    |
| Sma-1-2739 | NS_000200.1    | + | 123138634 | 123138683 |
| Sma-1-2740 | NW_003038109.1 | - | 41790     | 41741     |
| Sma-1-2741 | NS_000200.1    | - | 275724468 | 275724419 |
| Sma-1-2742 | NW_003038512.1 | - | 77887     | 77838     |
| Sma-1-2743 | NS_000200.1    | - | 338634584 | 338634535 |
| Sma-1-2744 | NW_003039047.1 | - | 3665      | 3616      |
| Sma-1-2745 | NS_000200.1    | - | 359204367 | 359204318 |
| Sma-1-2746 | NW_003037879.1 | + | 331477    | 331526    |
| Sma-1-2747 | NS_000200.1    | + | 123333733 | 123333782 |
| Sma-1-2748 | NW_003038161.1 | - | 485775    | 485726    |
| Sma-1-2749 | NS_000200.1    | - | 297855626 | 297855577 |
| Sma-1-2750 | NW_003038011.1 | - | 188039    | 187990    |
| Sma-1-2751 | NS_000200.1    | - | 227715689 | 227715640 |
| Sma-1-2752 | NW_003026621.1 | + | 5209      | 5258      |
| Sma-1-2753 | NS_000200.1    | + | 324848603 | 324848652 |
| Sma-1-2754 | NW_003037835.1 | + | 983226    | 983275    |
| Sma-1-2755 | NS_000200.1    | + | 75379734  | 75379783  |
| Sma-1-2756 | NW_003037974.1 | + | 685800    | 685849    |
| Sma-1-2757 | NS_000200.1    | + | 205361106 | 205361155 |
| Sma-1-2758 | NW_003037805.1 | + | 1396719   | 1396768   |
| Sma-1-2759 | NS_000200.1    | + | 27954563  | 27954612  |
| Sma-1-2760 | NW_003037938.1 | + | 750909    | 750958    |
| Sma-1-2761 | NS_000200.1    | + | 182788022 | 182788071 |
| Sma-1-2762 | NW_003038137.1 | - | 223316    | 223267    |
| Sma-1-2763 | NS_000200.1    | - | 285012212 | 285012163 |
| Sma-1-2764 | NW_003038012.1 | - | 125123    | 125074    |
| Sma-1-2765 | NS_000200.1    | - | 228449062 | 228449013 |
| Sma-1-2766 | NW_003037850.1 | - | 205776    | 205727    |

|            |                |   |           |           |
|------------|----------------|---|-----------|-----------|
| Sma-1-2767 | NS.000200.1    | - | 92191806  | 92191757  |
| Sma-1-2768 | NW_003037901.1 | + | 779563    | 779612    |
| Sma-1-2769 | NS.000200.1    | + | 146628024 | 146628073 |
| Sma-1-2770 | NW_003037777.1 | + | 43779     | 43828     |
| Sma-1-2771 | NS.000200.1    | + | 378861565 | 378861614 |
| Sma-1-2772 | NW_003026609.1 | - | 26381     | 26332     |
| Sma-1-2773 | NS.000200.1    | - | 309681373 | 309681324 |
| Sma-1-2774 | NW_003037882.1 | + | 135387    | 135436    |
| Sma-1-2775 | NS.000200.1    | + | 125427061 | 125427110 |
| Sma-1-2776 | NW_003026516.1 | - | 386497    | 386448    |
| Sma-1-2777 | NS.000200.1    | - | 299494794 | 299494745 |
| Sma-1-2778 | NS.000200.1    | - | 373500852 | 373500803 |
| Sma-1-2779 | NW_003037907.1 | + | 152697    | 152746    |
| Sma-1-2780 | NS.000200.1    | + | 151557186 | 151557235 |
| Sma-1-2781 | NW_003037994.1 | + | 272728    | 272777    |
| Sma-1-2782 | NS.000200.1    | + | 218804542 | 218804591 |
| Sma-1-2783 | NW_003026273.1 | - | 107       | 58        |
| Sma-1-2784 | NW_003037854.1 | + | 664372    | 664421    |
| Sma-1-2785 | NS.000200.1    | + | 97568793  | 97568842  |
| Sma-1-2786 | NS.000200.1    | - | 344652186 | 344652137 |
| Sma-1-2787 | NW_003038228.1 | + | 102959    | 103008    |
| Sma-1-2788 | NS.000200.1    | + | 310976239 | 310976288 |
| Sma-1-2789 | NW_003026465.1 | - | 627602    | 627553    |
| Sma-1-2790 | NS.000200.1    | - | 208020196 | 208020147 |
| Sma-1-2791 | NW_003039127.1 | + | 1921445   | 1921494   |
| Sma-1-2792 | NS.000200.1    | + | 114998944 | 114998993 |
| Sma-1-2793 | NW_003037856.1 | - | 580069    | 580020    |
| Sma-1-2794 | NS.000200.1    | - | 99938025  | 99937976  |
| Sma-1-2795 | NW_003037807.1 | - | 212802    | 212753    |
| Sma-1-2796 | NS.000200.1    | - | 30474318  | 30474269  |
| Sma-1-2797 | NW_003037850.1 | - | 554269    | 554220    |
| Sma-1-2798 | NS.000200.1    | - | 92540299  | 92540250  |
| Sma-1-2799 | NW_003037918.1 | - | 489526    | 489477    |
| Sma-1-2800 | NS.000200.1    | - | 167056516 | 167056467 |
| Sma-1-2801 | NW_003037804.1 | + | 683313    | 683362    |
| Sma-1-2802 | NS.000200.1    | + | 25823333  | 25823382  |
| Sma-1-2803 | NW_003026618.1 | - | 159218    | 159169    |
| Sma-1-2804 | NS.000200.1    | - | 321914220 | 321914171 |
| Sma-1-2805 | NW_003026618.1 | - | 125341    | 125292    |
| Sma-1-2806 | NS.000200.1    | - | 321880343 | 321880294 |
| Sma-1-2807 | NW_003037926.1 | + | 181498    | 181547    |
| Sma-1-2808 | NS.000200.1    | + | 173349768 | 173349817 |
| Sma-1-2809 | NW_003026456.1 | + | 301816    | 301865    |
| Sma-1-2810 | NS.000200.1    | + | 58224952  | 58225001  |
| Sma-1-2811 | NW_003037851.1 | - | 26502     | 26453     |
| Sma-1-2812 | NS.000200.1    | - | 93429812  | 93429763  |
| Sma-1-2813 | NW_003037940.1 | - | 396542    | 396493    |
| Sma-1-2814 | NS.000200.1    | - | 184138672 | 184138623 |
| Sma-1-2815 | NW_003026594.1 | - | 39558     | 39509     |
| Sma-1-2816 | NS.000200.1    | - | 304983928 | 304983879 |
| Sma-1-2817 | NW_003038171.1 | + | 29510     | 29559     |
| Sma-1-2818 | NS.000200.1    | + | 300669814 | 300669863 |

|            |                |   |           |           |
|------------|----------------|---|-----------|-----------|
| Sma-1-2819 | NW_003038010.1 | - | 325684    | 325635    |
| Sma-1-2820 | NS_000200.1    | - | 227143907 | 227143858 |
| Sma-1-2821 | NW_003037831.1 | - | 1687715   | 1687666   |
| Sma-1-2822 | NS_000200.1    | - | 71137017  | 71136968  |
| Sma-1-2823 | NW_003037938.1 | - | 41075     | 41026     |
| Sma-1-2824 | NS_000200.1    | - | 182078188 | 182078139 |
| Sma-1-2825 | NW_003037809.1 | + | 2038136   | 2038185   |
| Sma-1-2826 | NS_000200.1    | + | 35702600  | 35702649  |
| Sma-1-2827 | NW_003037925.1 | + | 270313    | 270362    |
| Sma-1-2828 | NS_000200.1    | + | 172672316 | 172672365 |
| Sma-1-2829 | NW_003037918.1 | + | 490733    | 490782    |
| Sma-1-2830 | NS_000200.1    | + | 167057723 | 167057772 |
| Sma-1-2831 | NW_003037793.1 | - | 2621752   | 2621703   |
| Sma-1-2832 | NS_000200.1    | - | 2621752   | 2621703   |
| Sma-1-2833 | NW_003038224.1 | - | 72625     | 72576     |
| Sma-1-2834 | NS_000200.1    | - | 309484353 | 309484304 |
| Sma-1-2835 | NW_003037925.1 | - | 166533    | 166484    |
| Sma-1-2836 | NS_000200.1    | - | 172568536 | 172568487 |
| Sma-1-2837 | NW_003038011.1 | - | 481719    | 481670    |
| Sma-1-2838 | NS_000200.1    | - | 228009369 | 228009320 |
| Sma-1-2839 | NW_003037852.1 | - | 473415    | 473366    |
| Sma-1-2840 | NW_003038011.1 | - | 483003    | 482954    |
| Sma-1-2841 | NS_000200.1    | - | 228010653 | 228010604 |
| Sma-1-2842 | NS_000200.1    | - | 94865310  | 94865261  |
| Sma-1-2843 | NW_003037940.1 | + | 142466    | 142515    |
| Sma-1-2844 | NS_000200.1    | + | 183884596 | 183884645 |
| Sma-1-2845 | NW_003037809.1 | + | 1723962   | 1724011   |
| Sma-1-2846 | NS_000200.1    | + | 35388426  | 35388475  |
| Sma-1-2847 | NW_003037981.1 | + | 1025584   | 1025633   |
| Sma-1-2848 | NS_000200.1    | + | 213423452 | 213423501 |
| Sma-1-2849 | NW_003037918.1 | + | 1797515   | 1797564   |
| Sma-1-2850 | NS_000200.1    | + | 168364505 | 168364554 |
| Sma-1-2851 | NW_003026458.1 | + | 179491    | 179540    |
| Sma-1-2852 | NS_000200.1    | + | 102047721 | 102047770 |
| Sma-1-2853 | NW_003037798.1 | + | 2708064   | 2708113   |
| Sma-1-2854 | NS_000200.1    | + | 16967222  | 16967271  |
| Sma-1-2855 | NW_003037816.1 | + | 992686    | 992735    |
| Sma-1-2856 | NS_000200.1    | + | 47201558  | 47201607  |
| Sma-1-2857 | NW_003038050.1 | + | 226429    | 226478    |
| Sma-1-2858 | NS_000200.1    | + | 256501323 | 256501372 |
| Sma-1-2859 | NW_003026584.1 | - | 50950     | 50901     |
| Sma-1-2860 | NS_000200.1    | - | 303705698 | 303705649 |
| Sma-1-2861 | NW_003037800.1 | - | 2358577   | 2358528   |
| Sma-1-2862 | NS_000200.1    | - | 20987937  | 20987888  |
| Sma-1-2863 | NW_003037827.1 | - | 780693    | 780644    |
| Sma-1-2864 | NS_000200.1    | - | 63402834  | 63402785  |
| Sma-1-2865 | NW_003038921.1 | + | 1519      | 1568      |
| Sma-1-2866 | NW_003038023.1 | + | 244370    | 244419    |
| Sma-1-2867 | NS_000200.1    | + | 237404661 | 237404710 |
| Sma-1-2868 | NS_000200.1    | + | 355588690 | 355588739 |
| Sma-1-2869 | NW_003037809.1 | + | 1485838   | 1485889   |
| Sma-1-2870 | NS_000200.1    | + | 35150302  | 35150353  |

|            |                |   |           |           |
|------------|----------------|---|-----------|-----------|
| Sma-1-2871 | NW_003026458.1 | + | 494264    | 494313    |
| Sma-1-2872 | NS_000200.1    | + | 102362494 | 102362543 |
| Sma-1-2873 | NW_003037903.1 | + | 134232    | 134281    |
| Sma-1-2874 | NS_000200.1    | + | 147688313 | 147688362 |
| Sma-1-2875 | NW_003038019.1 | - | 254792    | 254743    |
| Sma-1-2876 | NS_000200.1    | - | 233571610 | 233571561 |
| Sma-1-2877 | NW_003037908.1 | - | 974941    | 974892    |
| Sma-1-2878 | NS_000200.1    | - | 153448072 | 153448023 |
| Sma-1-2879 | NW_003037928.1 | + | 201896    | 201945    |
| Sma-1-2880 | NS_000200.1    | + | 174525849 | 174525898 |
| Sma-1-2881 | NW_003037808.1 | - | 797536    | 797487    |
| Sma-1-2882 | NS_000200.1    | - | 32584173  | 32584124  |
| Sma-1-2883 | NW_003026458.1 | + | 70616     | 70665     |
| Sma-1-2884 | NS_000200.1    | + | 101938846 | 101938895 |
| Sma-1-2885 | NW_003037926.1 | - | 586323    | 586274    |
| Sma-1-2886 | NS_000200.1    | - | 173754593 | 173754544 |
| Sma-1-2887 | NW_003037981.1 | - | 309706    | 309657    |
| Sma-1-2888 | NS_000200.1    | - | 212707574 | 212707525 |
| Sma-1-2889 | NW_003037972.1 | - | 445224    | 445175    |
| Sma-1-2890 | NS_000200.1    | - | 202920928 | 202920879 |
| Sma-1-2891 | NW_003037832.1 | - | 481949    | 481896    |
| Sma-1-2892 | NS_000200.1    | - | 71691380  | 71691327  |
| Sma-1-2893 | NW_003037992.1 | + | 109073    | 109122    |
| Sma-1-2894 | NS_000200.1    | + | 217950554 | 217950603 |
| Sma-1-2895 | NW_003031067.1 | - | 885       | 836       |
| Sma-1-2896 | NS_000200.1    | - | 325639272 | 325639223 |
| Sma-1-2897 | NW_003038219.1 | + | 18157     | 18206     |
| Sma-1-2898 | NS_000200.1    | + | 308198578 | 308198627 |
| Sma-1-2899 | NW_003037802.1 | + | 1022733   | 1022782   |
| Sma-1-2900 | NS_000200.1    | + | 23025527  | 23025576  |
| Sma-1-2901 | NW_003037974.1 | - | 660548    | 660499    |
| Sma-1-2902 | NS_000200.1    | - | 205335854 | 205335805 |
| Sma-1-2903 | NW_003037903.1 | - | 787915    | 787866    |
| Sma-1-2904 | NS_000200.1    | - | 148341996 | 148341947 |
| Sma-1-2905 | NW_003037982.1 | + | 1114843   | 1114892   |
| Sma-1-2906 | NS_000200.1    | + | 214774038 | 214774087 |
| Sma-1-2907 | NW_003037793.1 | - | 4123677   | 4123628   |
| Sma-1-2908 | NS_000200.1    | - | 4123677   | 4123628   |
| Sma-1-2909 | NW_003026460.1 | + | 379164    | 379214    |
| Sma-1-2910 | NS_000200.1    | + | 170901370 | 170901420 |
| Sma-1-2911 | NW_003038512.1 | - | 80176     | 80127     |
| Sma-1-2912 | NS_000200.1    | - | 338636873 | 338636824 |
| Sma-1-2913 | NW_003026460.1 | + | 491352    | 491401    |
| Sma-1-2914 | NS_000200.1    | + | 171013558 | 171013607 |
| Sma-1-2915 | NW_003037915.1 | + | 388894    | 388943    |
| Sma-1-2916 | NS_000200.1    | + | 162288880 | 162288929 |
| Sma-1-2917 | NW_003037799.1 | + | 1336808   | 1336858   |
| Sma-1-2918 | NS_000200.1    | + | 18327162  | 18327212  |
| Sma-1-2919 | NW_003038218.1 | - | 71202     | 71153     |
| Sma-1-2920 | NS_000200.1    | - | 307511500 | 307511451 |
| Sma-1-2921 | NW_003038135.1 | - | 121048    | 120999    |
| Sma-1-2922 | NS_000200.1    | - | 283993387 | 283993338 |

|            |                |   |           |           |
|------------|----------------|---|-----------|-----------|
| Sma-1-2923 | NW_003037937.1 | - | 667692    | 667643    |
| Sma-1-2924 | NS_000200.1    | - | 181867601 | 181867552 |
| Sma-1-2925 | NW_003037982.1 | - | 1038207   | 1038158   |
| Sma-1-2926 | NS_000200.1    | - | 214697402 | 214697353 |
| Sma-1-2927 | NW_003037807.1 | - | 956732    | 956682    |
| Sma-1-2928 | NS_000200.1    | - | 31218248  | 31218198  |
| Sma-1-2929 | NW_003037917.1 | + | 327717    | 327766    |
| Sma-1-2930 | NS_000200.1    | + | 165364521 | 165364570 |
| Sma-1-2931 | NW_003026462.1 | + | 467584    | 467633    |
| Sma-1-2932 | NS_000200.1    | + | 197135087 | 197135136 |
| Sma-1-2933 | NW_003038000.1 | + | 55157     | 55207     |
| Sma-1-2934 | NS_000200.1    | + | 222525935 | 222525985 |
| Sma-1-2935 | NW_003037924.1 | - | 123908    | 123858    |
| Sma-1-2936 | NS_000200.1    | - | 171830866 | 171830816 |
| Sma-1-2937 | NW_003037796.1 | + | 974570    | 974619    |
| Sma-1-2938 | NS_000200.1    | + | 9184214   | 9184263   |
| Sma-1-2939 | NW_003038224.1 | - | 160160    | 160111    |
| Sma-1-2940 | NS_000200.1    | - | 309571888 | 309571839 |
| Sma-1-2941 | NW_003038517.1 | - | 171212    | 171163    |
| Sma-1-2942 | NS_000200.1    | - | 340935700 | 340935651 |
| Sma-1-2943 | NW_003038257.1 | + | 495667    | 495745    |
| Sma-1-2944 | NS_000200.1    | + | 321669995 | 321670073 |
| Sma-1-2945 | NW_003035866.1 | + | 71489     | 71538     |
| Sma-1-2946 | NS_000200.1    | + | 334165299 | 334165348 |
| Sma-1-2947 | NS_000200.1    | + | 365467216 | 365467265 |
| env-81     | AB231864.1     | - | 107811    | 107766    |
| Sma-1-2948 | NW_003022932.1 | - | 2211      | 2166      |
| Sma-1-2949 | NW_003037980.1 | - | 285776    | 285731    |
| Sma-1-2950 | NS_000200.1    | - | 371905439 | 371905394 |
| Sma-1-2951 | NS_000200.1    | - | 211246638 | 211246593 |
| Sma-1-2952 | NW_003038124.1 | + | 218524    | 218573    |
| Sma-1-2953 | NS_000200.1    | + | 279211168 | 279211217 |
| Sma-1-2954 | NW_003037904.1 | + | 231699    | 231747    |
| Sma-1-2955 | NS_000200.1    | + | 148946198 | 148946246 |
| Sma-1-2956 | NW_003037978.1 | - | 327690    | 327641    |
| Sma-1-2957 | NS_000200.1    | - | 209595700 | 209595651 |
| Sma-1-2958 | NW_003026510.1 | + | 42387     | 42436     |
| Sma-1-2959 | NS_000200.1    | + | 283482568 | 283482617 |
| Sma-1-2960 | NW_003037908.1 | + | 928012    | 928061    |
| Sma-1-2961 | NW_003037908.1 | - | 940027    | 939978    |
| Sma-1-2962 | NS_000200.1    | + | 153401143 | 153401192 |
| Sma-1-2963 | NS_000200.1    | - | 153413158 | 153413109 |
| Sma-1-2964 | NW_003037967.1 | + | 471923    | 471972    |
| Sma-1-2965 | NS_000200.1    | + | 199711894 | 199711943 |
| Sma-1-2966 | NW_003037821.1 | + | 1113666   | 1113715   |
| Sma-1-2967 | NS_000200.1    | + | 54258150  | 54258199  |
| Sma-1-2968 | NW_003038450.1 | - | 3079      | 3030      |
| Sma-1-2969 | NW_003037797.1 | + | 3213702   | 3213751   |
| Sma-1-2970 | NW_003037797.1 | + | 3217539   | 3217588   |
| Sma-1-2971 | NS_000200.1    | + | 13641562  | 13641611  |
| Sma-1-2972 | NS_000200.1    | + | 13645399  | 13645448  |
| Sma-1-2973 | NS_000200.1    | - | 330533980 | 330533931 |

|            |                |   |           |           |
|------------|----------------|---|-----------|-----------|
| Sma-1-2974 | NW_003038087.1 | + | 126265    | 126314    |
| Sma-1-2975 | NS_000200.1    | + | 273154666 | 273154715 |
| Sma-1-2976 | NW_003037789.1 | + | 53182     | 53231     |
| Sma-1-2977 | NS_000200.1    | + | 380837802 | 380837851 |
| Sma-1-2978 | NW_003037851.1 | - | 502124    | 502075    |
| Sma-1-2979 | NS_000200.1    | - | 93905434  | 93905385  |
| Sma-1-2980 | NW_003026516.1 | + | 361215    | 361264    |
| Sma-1-2981 | NS_000200.1    | + | 299469512 | 299469561 |
| Sma-1-2982 | NW_003037812.1 | - | 935294    | 935245    |
| Sma-1-2983 | NS_000200.1    | - | 40418033  | 40417984  |
| Sma-1-2984 | NW_003035573.1 | - | 3522      | 3473      |
| Sma-1-2985 | NS_000200.1    | - | 328461731 | 328461682 |
| Sma-1-2986 | NW_003037882.1 | - | 227216    | 227167    |
| Sma-1-2987 | NS_000200.1    | - | 125518890 | 125518841 |
| Sma-1-2988 | NW_003037878.1 | - | 295978    | 295929    |
| Sma-1-2989 | NS_000200.1    | - | 122349456 | 122349407 |
| Sma-1-2990 | NW_003038028.1 | - | 757905    | 757857    |
| Sma-1-2991 | NS_000200.1    | - | 242065479 | 242065431 |
| Sma-1-2992 | NW_003026464.1 | + | 499923    | 499972    |
| Sma-1-2993 | NS_000200.1    | + | 203800232 | 203800281 |
| Sma-1-2994 | NW_003029000.1 | + | 1882      | 1931      |
| Sma-1-2995 | NS_000200.1    | + | 375129325 | 375129374 |
| Sma-1-2996 | NW_003037944.1 | - | 276186    | 276137    |
| Sma-1-2997 | NS_000200.1    | - | 188497539 | 188497490 |
| Sma-1-2998 | NW_003038120.1 | - | 123780    | 123731    |
| Sma-1-2999 | NS_000200.1    | - | 278309003 | 278308954 |
| Sma-1-3000 | NW_003037810.1 | - | 149359    | 149310    |
| Sma-1-3001 | NW_003038261.1 | + | 620681    | 620730    |
| Sma-1-3002 | NS_000200.1    | + | 324234332 | 324234381 |
| Sma-1-3003 | NS_000200.1    | - | 36753881  | 36753832  |
| Sma-1-3004 | NW_003037847.1 | + | 138571    | 138620    |
| Sma-1-3005 | NS_000200.1    | + | 88790301  | 88790350  |
| Sma-1-3006 | NW_003037860.1 | + | 342482    | 342531    |
| Sma-1-3007 | NS_000200.1    | + | 104085510 | 104085559 |
| Sma-1-3008 | NW_003037864.1 | + | 167011    | 167060    |
| Sma-1-3009 | NS_000200.1    | + | 108659585 | 108659634 |
| Sma-1-3010 | NW_003038252.1 | + | 31907     | 31956     |
| Sma-1-3011 | NS_000200.1    | + | 318887495 | 318887544 |
| Sma-1-3012 | NW_003020602.1 | + | 3616      | 3665      |
| Sma-1-3013 | NS_000200.1    | + | 360369865 | 360369914 |
| Sma-1-3014 | NW_003037833.1 | - | 695149    | 695100    |
| Sma-1-3015 | NS_000200.1    | - | 72886245  | 72886196  |
| Sma-1-3016 | NW_003037832.1 | - | 656951    | 656902    |
| Sma-1-3017 | NS_000200.1    | - | 71866382  | 71866333  |
| Sma-1-3018 | NW_003037975.1 | + | 357734    | 357783    |
| Sma-1-3019 | NS_000200.1    | + | 205939958 | 205940007 |
| Sma-1-3020 | NW_003024225.1 | + | 969       | 1018      |
| Sma-1-3021 | NS_000200.1    | + | 348588149 | 348588198 |
| Sma-1-3022 | NW_003028936.1 | + | 252       | 301       |
| Sma-1-3023 | NS_000200.1    | + | 370262939 | 370262988 |
| Sma-1-3024 | NW_003037816.1 | + | 40028     | 40077     |
| Sma-1-3025 | NS_000200.1    | + | 46248900  | 46248949  |



|            |                |   |           |           |
|------------|----------------|---|-----------|-----------|
| Sma-1-3026 | NW_003037914.1 | - | 1643117   | 1643068   |
| Sma-1-3027 | NS_000200.1    | - | 161787367 | 161787318 |
| Sma-1-3028 | NW_003038033.1 | + | 93822     | 93871     |
| Sma-1-3029 | NS_000200.1    | + | 246073824 | 246073873 |
| Sma-1-3030 | NW_003037809.1 | - | 2452855   | 2452806   |
| Sma-1-3031 | NS_000200.1    | - | 36117319  | 36117270  |
| Sma-1-3032 | NW_003037846.1 | - | 938914    | 938865    |
| Sma-1-3033 | NS_000200.1    | - | 88573484  | 88573435  |
| Sma-1-3034 | NW_003037942.1 | - | 40441     | 40392     |
| Sma-1-3035 | NS_000200.1    | - | 185800349 | 185800300 |
| Sma-1-3036 | NW_003038042.1 | - | 159380    | 159331    |
| Sma-1-3037 | NS_000200.1    | - | 254104979 | 254104930 |
| Sma-1-3038 | NW_003037839.1 | + | 771497    | 771546    |
| Sma-1-3039 | NS_000200.1    | + | 79729647  | 79729696  |
| Sma-1-3040 | NW_003037903.1 | + | 699606    | 699655    |
| Sma-1-3041 | NS_000200.1    | + | 148253687 | 148253736 |
| Sma-1-3042 | NW_003037832.1 | + | 452361    | 452410    |
| Sma-1-3043 | NS_000200.1    | + | 71661792  | 71661841  |
| Sma-1-3044 | NW_003037904.1 | - | 260820    | 260771    |
| Sma-1-3045 | NS_000200.1    | - | 148975319 | 148975270 |
| Sma-1-3046 | NW_003037982.1 | - | 147501    | 147452    |
| Sma-1-3047 | NS_000200.1    | - | 213806696 | 213806647 |
| Sma-1-3048 | NW_003037981.1 | + | 165461    | 165510    |
| Sma-1-3049 | NS_000200.1    | + | 212563329 | 212563378 |
| Sma-1-3050 | NW_003037945.1 | + | 516918    | 516967    |
| Sma-1-3051 | NS_000200.1    | + | 189618882 | 189618931 |
| Sma-1-3052 | NW_003037800.1 | - | 1808209   | 1808160   |
| Sma-1-3053 | NS_000200.1    | - | 20437569  | 20437520  |
| Sma-1-3054 | NW_003038224.1 | - | 149383    | 149334    |
| Sma-1-3055 | NS_000200.1    | - | 309561111 | 309561062 |
| Sma-1-3056 | NW_003020184.1 | + | 316       | 365       |
| Sma-1-3057 | NS_000200.1    | + | 371153957 | 371154006 |
| Sma-1-3058 | NW_003026464.1 | + | 545270    | 545319    |
| Sma-1-3059 | NS_000200.1    | + | 203845579 | 203845628 |
| Sma-1-3060 | NW_003037903.1 | + | 663513    | 663562    |
| Sma-1-3061 | NS_000200.1    | + | 148217594 | 148217643 |
| Sma-1-3062 | NW_003037866.1 | - | 927962    | 927913    |
| Sma-1-3063 | NS_000200.1    | - | 112415761 | 112415712 |
| Sma-1-3064 | NW_003037827.1 | - | 1724632   | 1724583   |
| Sma-1-3065 | NS_000200.1    | - | 64346773  | 64346724  |
| Sma-1-3066 | NW_003037969.1 | + | 399857    | 399906    |
| Sma-1-3067 | NS_000200.1    | + | 201005984 | 201006033 |
| Sma-1-3068 | NW_003025258.1 | - | 614       | 565       |
| Sma-1-3069 | NS_000200.1    | - | 361497286 | 361497237 |
| Sma-1-3070 | NW_003038019.1 | + | 319566    | 319615    |
| Sma-1-3071 | NS_000200.1    | + | 233636384 | 233636433 |
| Sma-1-3072 | NW_003037944.1 | + | 624828    | 624877    |
| Sma-1-3073 | NS_000200.1    | + | 188846181 | 188846230 |
| Sma-1-3074 | NW_003037809.1 | - | 1667336   | 1667287   |
| Sma-1-3075 | NS_000200.1    | - | 35331800  | 35331751  |
| Sma-1-3076 | NW_003038148.1 | + | 92307     | 92356     |
| Sma-1-3077 | NS_000200.1    | + | 290166291 | 290166340 |

|            |                |   |           |           |
|------------|----------------|---|-----------|-----------|
| Sma-1-3078 | NW_003037913.1 | + | 863599    | 863648    |
| Sma-1-3079 | NS_000200.1    | + | 159427350 | 159427399 |
| Sma-1-3080 | NW_003038036.1 | + | 258951    | 259000    |
| Sma-1-3081 | NS_000200.1    | + | 249192803 | 249192852 |
| Sma-1-3082 | NW_003038037.1 | - | 1565870   | 1565821   |
| Sma-1-3083 | NW_003038056.1 | - | 53994     | 53945     |
| Sma-1-3084 | NS_000200.1    | - | 259031645 | 259031596 |
| Sma-1-3085 | NS_000200.1    | - | 251721279 | 251721230 |
| Sma-1-3086 | NW_003037894.1 | - | 371707    | 371658    |
| Sma-1-3087 | NS_000200.1    | - | 142268280 | 142268231 |
| Sma-1-3088 | NW_003037943.1 | - | 886840    | 886791    |
| Sma-1-3089 | NS_000200.1    | - | 187908373 | 187908324 |
| Sma-1-3090 | NW_003037803.1 | - | 346822    | 346773    |
| Sma-1-3091 | NS_000200.1    | - | 23847359  | 23847310  |
| Sma-1-3092 | NW_003038243.1 | - | 194832    | 194783    |
| Sma-1-3093 | NS_000200.1    | - | 315133316 | 315133267 |
| Sma-1-3094 | NW_003038031.1 | + | 30052     | 30101     |
| Sma-1-3095 | NS_000200.1    | + | 244307810 | 244307859 |
| Sma-1-3096 | NW_003038244.1 | - | 278567    | 278518    |
| Sma-1-3097 | NS_000200.1    | - | 315423772 | 315423723 |
| Sma-1-3098 | NW_003037807.1 | - | 1304567   | 1304518   |
| Sma-1-3099 | NS_000200.1    | - | 31566083  | 31566034  |
| Sma-1-3100 | NW_003037999.1 | - | 128551    | 128502    |
| Sma-1-3101 | NS_000200.1    | - | 221823105 | 221823056 |
| Sma-1-3102 | NW_003026609.1 | - | 117900    | 117851    |
| Sma-1-3103 | NS_000200.1    | - | 309772892 | 309772843 |
| Sma-1-3104 | NW_003037854.1 | - | 151184    | 151135    |
| Sma-1-3105 | NW_003038152.1 | - | 226856    | 226807    |
| Sma-1-3106 | NS_000200.1    | - | 292832580 | 292832531 |
| Sma-1-3107 | NS_000200.1    | - | 97055605  | 97055556  |
| Sma-1-3108 | NW_003038224.1 | - | 156043    | 155994    |
| Sma-1-3109 | NS_000200.1    | - | 309567771 | 309567722 |
| Sma-1-3110 | NW_003027803.1 | - | 1135      | 1086      |
| Sma-1-3111 | NW_003037916.1 | + | 1284316   | 1284365   |
| Sma-1-3112 | NS_000200.1    | + | 164477727 | 164477776 |
| Sma-1-3113 | NS_000200.1    | - | 365958061 | 365958012 |
| Sma-1-3114 | NW_003037871.1 | - | 290855    | 290806    |
| Sma-1-3115 | NS_000200.1    | - | 117738593 | 117738544 |
| Sma-1-3116 | NW_003037864.1 | + | 157701    | 157750    |
| Sma-1-3117 | NS_000200.1    | + | 108650275 | 108650324 |
| Sma-1-3118 | NW_003037868.1 | - | 13957     | 13908     |
| Sma-1-3119 | NS_000200.1    | - | 115985669 | 115985620 |
| Sma-1-3120 | NW_003038502.1 | + | 173823    | 173872    |
| Sma-1-3121 | NS_000200.1    | + | 335172868 | 335172917 |
| Sma-1-3122 | NW_003037799.1 | + | 1128056   | 1128105   |
| Sma-1-3123 | NS_000200.1    | + | 18118410  | 18118459  |
| Sma-1-3124 | NW_003037809.1 | + | 2746232   | 2746281   |
| Sma-1-3125 | NS_000200.1    | + | 36410696  | 36410745  |
| Sma-1-3126 | NW_003038008.1 | - | 203654    | 203605    |
| Sma-1-3127 | NS_000200.1    | - | 225876750 | 225876701 |
| Sma-1-3128 | NW_003037915.1 | + | 193890    | 193939    |
| Sma-1-3129 | NS_000200.1    | + | 162093876 | 162093925 |

|            |                |   |           |           |
|------------|----------------|---|-----------|-----------|
| Sma-1-3130 | NW_003037821.1 | - | 691687    | 691638    |
| Sma-1-3131 | NS_000200.1    | - | 53836171  | 53836122  |
| Sma-1-3132 | NW_003037854.1 | - | 1002530   | 1002481   |
| Sma-1-3133 | NS_000200.1    | - | 97906951  | 97906902  |
| Sma-1-3134 | NW_003037982.1 | + | 588444    | 588493    |
| Sma-1-3135 | NS_000200.1    | + | 214247639 | 214247688 |
| Sma-1-3136 | NW_003038216.1 | + | 86928     | 86977     |
| Sma-1-3137 | NS_000200.1    | + | 306872560 | 306872609 |
| Sma-1-3138 | NW_003037903.1 | + | 1031582   | 1031631   |
| Sma-1-3139 | NS_000200.1    | + | 148585663 | 148585712 |
| Sma-1-3140 | NW_003026458.1 | - | 431635    | 431586    |
| Sma-1-3141 | NS_000200.1    | - | 102299865 | 102299816 |
| Sma-1-3142 | NW_003037831.1 | - | 976781    | 976732    |
| Sma-1-3143 | NS_000200.1    | - | 70426083  | 70426034  |
| Sma-1-3144 | NW_003037902.1 | + | 374708    | 374757    |
| Sma-1-3145 | NS_000200.1    | + | 147129942 | 147129991 |
| Sma-1-3146 | NW_003037831.1 | + | 949404    | 949453    |
| Sma-1-3147 | NS_000200.1    | + | 70398706  | 70398755  |
| Sma-1-3148 | NW_003026458.1 | + | 391700    | 391749    |
| Sma-1-3149 | NS_000200.1    | + | 102259930 | 102259979 |
| Sma-1-3150 | NW_003037904.1 | + | 317896    | 317945    |
| Sma-1-3151 | NS_000200.1    | + | 149032395 | 149032444 |
| Sma-1-3152 | NW_003037902.1 | + | 229460    | 229509    |
| Sma-1-3153 | NS_000200.1    | + | 146984694 | 146984743 |
| Sma-1-3154 | NW_003037986.1 | - | 109970    | 109921    |
| Sma-1-3155 | NS_000200.1    | - | 215526722 | 215526673 |
| Sma-1-3156 | NW_003037996.1 | + | 368522    | 368571    |
| Sma-1-3157 | NW_003037996.1 | - | 281070    | 281021    |
| Sma-1-3158 | NS_000200.1    | + | 220613398 | 220613447 |
| Sma-1-3159 | NS_000200.1    | - | 220525946 | 220525897 |
| Sma-1-3160 | NW_003037981.1 | - | 1136217   | 1136168   |
| Sma-1-3161 | NS_000200.1    | - | 213534085 | 213534036 |
| Sma-1-3162 | NW_003026458.1 | + | 115045    | 115094    |
| Sma-1-3163 | NS_000200.1    | + | 101983275 | 101983324 |
| Sma-1-3164 | NW_003037841.1 | + | 1575510   | 1575559   |
| Sma-1-3165 | NS_000200.1    | + | 84186691  | 84186740  |
| Sma-1-3166 | NW_003026456.1 | - | 93700     | 93651     |
| Sma-1-3167 | NS_000200.1    | - | 58016836  | 58016787  |
| Sma-1-3168 | NW_003026605.1 | + | 121790    | 121839    |
| Sma-1-3169 | NS_000200.1    | + | 307800654 | 307800703 |
| Sma-1-3170 | NW_003026605.1 | - | 14128     | 14079     |
| Sma-1-3171 | NS_000200.1    | - | 307692992 | 307692943 |
| Sma-1-3172 | NW_003037954.1 | - | 47267     | 47218     |
| Sma-1-3173 | NS_000200.1    | - | 193276889 | 193276840 |
| Sma-1-3174 | NW_003037844.1 | - | 122735    | 122686    |
| Sma-1-3175 | NS_000200.1    | - | 86306181  | 86306132  |
| Sma-1-3176 | NW_003026456.1 | - | 739281    | 739232    |
| Sma-1-3177 | NS_000200.1    | - | 58662417  | 58662368  |
| Sma-1-3178 | NW_003037988.1 | + | 34134     | 34183     |
| Sma-1-3179 | NS_000200.1    | + | 216027952 | 216028001 |
| Sma-1-3180 | NW_003038515.1 | - | 82313     | 82264     |
| Sma-1-3181 | NS_000200.1    | - | 340166378 | 340166329 |

|            |                |   |           |           |
|------------|----------------|---|-----------|-----------|
| Sma-1-3182 | NW_003037988.1 | + | 74137     | 74186     |
| Sma-1-3183 | NS_000200.1    | + | 216067955 | 216068004 |
| Sma-1-3184 | NW_003026456.1 | + | 434255    | 434304    |
| Sma-1-3185 | NW_003038030.1 | - | 476314    | 476265    |
| Sma-1-3186 | NS_000200.1    | + | 58357391  | 58357440  |
| Sma-1-3187 | NS_000200.1    | - | 243612181 | 243612132 |
| Sma-1-3188 | NW_003037989.1 | + | 108131    | 108180    |
| Sma-1-3189 | NS_000200.1    | + | 216718690 | 216718739 |
| Sma-1-3190 | NW_003037906.1 | - | 704905    | 704856    |
| Sma-1-3191 | NS_000200.1    | - | 151012684 | 151012635 |
| Sma-1-3192 | NW_003037885.1 | - | 829560    | 829511    |
| Sma-1-3193 | NS_000200.1    | - | 128927507 | 128927458 |
| Sma-1-3194 | NW_003038221.1 | - | 128613    | 128564    |
| Sma-1-3195 | NS_000200.1    | - | 308769877 | 308769828 |
| Sma-1-3196 | NW_003025257.1 | + | 6         | 55        |
| Sma-1-3197 | NS_000200.1    | + | 361495542 | 361495591 |
| Sma-1-3198 | NW_003026516.1 | + | 608       | 657       |
| Sma-1-3199 | NS_000200.1    | + | 299108905 | 299108954 |
| Sma-1-3200 | NW_003037814.1 | - | 1604488   | 1604439   |
| Sma-1-3201 | NS_000200.1    | - | 44588348  | 44588299  |
| Sma-1-3202 | NW_003038122.1 | - | 22380     | 22331     |
| Sma-1-3203 | NS_000200.1    | - | 278541607 | 278541558 |
| Sma-1-3204 | NW_003037890.1 | + | 1848568   | 1848617   |
| Sma-1-3205 | NS_000200.1    | + | 137531929 | 137531978 |
| Sma-1-3206 | NW_003037825.1 | + | 1030292   | 1030341   |
| Sma-1-3207 | NS_000200.1    | + | 60160074  | 60160123  |
| Sma-1-3208 | NW_003037858.1 | + | 639394    | 639443    |
| Sma-1-3209 | NS_000200.1    | + | 101303670 | 101303719 |
| Sma-1-3210 | NW_003038248.1 | - | 49038     | 48989     |
| Sma-1-3211 | NS_000200.1    | - | 316360305 | 316360256 |
| Sma-1-3212 | NW_003038028.1 | + | 727111    | 727160    |
| Sma-1-3213 | NS_000200.1    | + | 242034685 | 242034734 |
| Sma-1-3214 | NW_003037807.1 | + | 1438971   | 1439020   |
| Sma-1-3215 | NS_000200.1    | + | 31700487  | 31700536  |
| Sma-1-3216 | NW_003037993.1 | - | 183104    | 183055    |
| Sma-1-3217 | NS_000200.1    | - | 218369807 | 218369758 |
| Sma-1-3218 | NW_003037993.1 | + | 205900    | 205949    |
| Sma-1-3219 | NS_000200.1    | + | 218392603 | 218392652 |
| Sma-1-3220 | NW_003026456.1 | - | 159630    | 159581    |
| Sma-1-3221 | NS_000200.1    | - | 58082766  | 58082717  |
| Sma-1-3222 | NW_003037773.1 | + | 50608     | 50657     |
| Sma-1-3223 | NS_000200.1    | + | 378572964 | 378573013 |
| Sma-1-3224 | NW_003026430.1 | + | 30        | 79        |
| Sma-1-3225 | NS_000200.1    | + | 344998929 | 344998978 |
| Sma-1-3226 | NW_003037835.1 | + | 526163    | 526212    |
| Sma-1-3227 | NS_000200.1    | + | 74922671  | 74922720  |
| Sma-1-3228 | NW_003026465.1 | - | 663689    | 663640    |
| Sma-1-3229 | NS_000200.1    | - | 208056283 | 208056234 |
| Sma-1-3230 | NW_003037918.1 | + | 1308031   | 1308080   |
| Sma-1-3231 | NS_000200.1    | + | 167875021 | 167875070 |
| Sma-1-3232 | NW_003026303.1 | + | 6         | 55        |
| Sma-1-3233 | NS_000200.1    | + | 344700252 | 344700301 |

|            |                |   |           |           |
|------------|----------------|---|-----------|-----------|
| Sma-1-3234 | NW_003025800.1 | + | 721       | 770       |
| Sma-1-3235 | NS_000200.1    | + | 356551922 | 356551971 |
| Sma-1-3236 | NW_003025628.1 | - | 931       | 882       |
| Sma-1-3237 | NW_003038028.1 | + | 52813     | 52862     |
| Sma-1-3238 | NS_000200.1    | + | 241360387 | 241360436 |
| Sma-1-3239 | NS_000200.1    | - | 356265189 | 356265140 |
| Sma-1-3240 | NW_003037836.1 | - | 199510    | 199461    |
| Sma-1-3241 | NS_000200.1    | - | 75756609  | 75756560  |
| Sma-1-3242 | NW_003037905.1 | - | 307300    | 307251    |
| Sma-1-3243 | NS_000200.1    | - | 149576312 | 149576263 |
| Sma-1-3244 | NW_003038021.1 | - | 414199    | 414150    |
| Sma-1-3245 | NS_000200.1    | - | 235242774 | 235242725 |
| Sma-1-3246 | NW_003037845.1 | - | 12697     | 12648     |
| Sma-1-3247 | NS_000200.1    | - | 87014600  | 87014551  |
| Sma-1-3248 | NW_003037836.1 | + | 199997    | 200046    |
| Sma-1-3249 | NS_000200.1    | + | 75757096  | 75757145  |
| Sma-1-3250 | NW_003037831.1 | - | 1219497   | 1219448   |
| Sma-1-3251 | NS_000200.1    | - | 70668799  | 70668750  |
| Sma-1-3252 | NW_003037868.1 | + | 7615      | 7664      |
| Sma-1-3253 | NS_000200.1    | + | 115979327 | 115979376 |
| Sma-1-3254 | NW_003037831.1 | - | 1166629   | 1166580   |
| Sma-1-3255 | NS_000200.1    | - | 70615931  | 70615882  |
| Sma-1-3256 | NW_003037994.1 | - | 552551    | 552502    |
| Sma-1-3257 | NS_000200.1    | - | 219084365 | 219084316 |
| Sma-1-3258 | NW_003037858.1 | - | 541098    | 541049    |
| Sma-1-3259 | NS_000200.1    | - | 101205374 | 101205325 |
| Sma-1-3260 | NW_003037994.1 | - | 566610    | 566561    |
| Sma-1-3261 | NS_000200.1    | - | 219098424 | 219098375 |
| Sma-1-3262 | NW_003037807.1 | - | 782247    | 782198    |
| Sma-1-3263 | NS_000200.1    | - | 31043763  | 31043714  |
| Sma-1-3264 | NW_003025267.1 | - | 533       | 484       |
| Sma-1-3265 | NS_000200.1    | - | 361512356 | 361512307 |
| Sma-1-3266 | NW_003037846.1 | - | 462817    | 462768    |
| Sma-1-3267 | NS_000200.1    | - | 88097387  | 88097338  |
| Sma-1-3268 | NW_003037996.1 | - | 175123    | 175074    |
| Sma-1-3269 | NS_000200.1    | - | 220419999 | 220419950 |
| Sma-1-3270 | NW_003034567.1 | + | 1740      | 1789      |
| Sma-1-3271 | NS_000200.1    | + | 327642634 | 327642683 |
| Sma-1-3272 | NW_003037793.1 | - | 3394110   | 3394061   |
| Sma-1-3273 | NW_003038517.1 | + | 244201    | 244250    |
| Sma-1-3274 | NS_000200.1    | + | 341008689 | 341008738 |
| Sma-1-3275 | NS_000200.1    | - | 3394110   | 3394061   |
| Sma-1-3276 | NW_003038153.1 | + | 555787    | 555836    |
| Sma-1-3277 | NS_000200.1    | + | 293617836 | 293617885 |
| Sma-1-3278 | NW_003037890.1 | - | 332928    | 332879    |
| Sma-1-3279 | NS_000200.1    | - | 136016289 | 136016240 |
| Sma-1-3280 | NW_003037918.1 | + | 440986    | 441035    |
| Sma-1-3281 | NS_000200.1    | + | 167007976 | 167008025 |
| Sma-1-3282 | NW_003038242.1 | - | 87184     | 87135     |
| Sma-1-3283 | NS_000200.1    | - | 314786330 | 314786281 |
| Sma-1-3284 | NW_003026469.1 | + | 207333    | 207382    |
| Sma-1-3285 | NS_000200.1    | + | 217828992 | 217829041 |

|            |                |   |           |           |
|------------|----------------|---|-----------|-----------|
| Sma-1-3286 | NW_003026466.1 | - | 26389     | 26340     |
| Sma-1-3287 | NS_000200.1    | - | 215293496 | 215293447 |
| Sma-1-3288 | NW_003026466.1 | + | 26633     | 26682     |
| Sma-1-3289 | NS_000200.1    | + | 215293740 | 215293789 |
| Sma-1-3290 | NW_003026466.1 | - | 42469     | 42420     |
| Sma-1-3291 | NS_000200.1    | - | 215309576 | 215309527 |
| Sma-1-3292 | NW_003037831.1 | - | 1125182   | 1125133   |
| Sma-1-3293 | NS_000200.1    | - | 70574484  | 70574435  |
| Sma-1-3294 | NW_003037836.1 | - | 329103    | 329054    |
| Sma-1-3295 | NS_000200.1    | - | 75886202  | 75886153  |
| Sma-1-3296 | NW_003037995.1 | - | 237550    | 237501    |
| Sma-1-3297 | NS_000200.1    | - | 219927318 | 219927269 |
| Sma-1-3298 | NW_003037836.1 | - | 474542    | 474493    |
| Sma-1-3299 | NS_000200.1    | - | 76031641  | 76031592  |
| Sma-1-3300 | NW_003037817.1 | - | 524885    | 524835    |
| Sma-1-3301 | NS_000200.1    | - | 47907237  | 47907187  |
| Sma-1-3302 | NW_003037817.1 | + | 523360    | 523410    |
| Sma-1-3303 | NS_000200.1    | + | 47905712  | 47905762  |
| Sma-1-3304 | NW_003037995.1 | + | 468200    | 468249    |
| Sma-1-3305 | NS_000200.1    | + | 220157968 | 220158017 |
| Sma-1-3306 | NW_003026487.1 | + | 98128     | 98178     |
| Sma-1-3307 | NS_000200.1    | + | 261008822 | 261008872 |
| Sma-1-3308 | NW_003037996.1 | - | 205702    | 205653    |
| Sma-1-3309 | NS_000200.1    | - | 220450578 | 220450529 |
| Sma-1-3310 | NW_003038079.1 | + | 305570    | 305619    |
| Sma-1-3311 | NS_000200.1    | + | 268435558 | 268435607 |
| Sma-1-3312 | NW_003037937.1 | - | 615858    | 615809    |
| Sma-1-3313 | NS_000200.1    | - | 181815767 | 181815718 |
| Sma-1-3314 | NW_003037997.1 | - | 379504    | 379455    |
| Sma-1-3315 | NS_000200.1    | - | 221190946 | 221190897 |
| Sma-1-3316 | NW_003024257.1 | + | 546       | 595       |
| Sma-1-3317 | NS_000200.1    | + | 348650706 | 348650755 |
| Sma-1-3318 | NW_003038042.1 | - | 136204    | 136155    |
| Sma-1-3319 | NS_000200.1    | - | 254081803 | 254081754 |
| Sma-1-3320 | NW_003037979.1 | - | 60545     | 60496     |
| Sma-1-3321 | NS_000200.1    | - | 210121565 | 210121516 |
| Sma-1-3322 | NW_003024194.1 | + | 353       | 402       |
| Sma-1-3323 | NS_000200.1    | + | 348539414 | 348539463 |
| Sma-1-3324 | NW_003037999.1 | + | 110644    | 110693    |
| Sma-1-3325 | NS_000200.1    | + | 221805198 | 221805247 |
| Sma-1-3326 | NW_003037830.1 | - | 740979    | 740930    |
| Sma-1-3327 | NS_000200.1    | - | 68631350  | 68631301  |
| Sma-1-3328 | NW_003037837.1 | - | 227768    | 227719    |
| Sma-1-3329 | NS_000200.1    | - | 77033626  | 77033577  |
| Sma-1-3330 | NW_003023565.1 | - | 2908      | 2859      |
| Sma-1-3331 | NS_000200.1    | - | 373701837 | 373701788 |
| Sma-1-3332 | NW_003026471.1 | + | 103499    | 103548    |
| Sma-1-3333 | NS_000200.1    | + | 222215732 | 222215781 |
| Sma-1-3334 | NW_003026605.1 | - | 46896     | 46847     |
| Sma-1-3335 | NS_000200.1    | - | 307725760 | 307725711 |
| Sma-1-3336 | NW_003037837.1 | + | 58487     | 58536     |
| Sma-1-3337 | NW_003037837.1 | + | 84874     | 84923     |

|            |                |   |           |           |
|------------|----------------|---|-----------|-----------|
| Sma-1-3338 | NW_003037837.1 | - | 105841    | 105792    |
| Sma-1-3339 | NS_000200.1    | + | 76864345  | 76864394  |
| Sma-1-3340 | NS_000200.1    | + | 76890732  | 76890781  |
| Sma-1-3341 | NS_000200.1    | - | 76911699  | 76911650  |
| Sma-1-3342 | NW_003037979.1 | + | 452870    | 452919    |
| Sma-1-3343 | NS_000200.1    | + | 210513890 | 210513939 |
| Sma-1-3344 | NW_003038000.1 | - | 109188    | 109139    |
| Sma-1-3345 | NS_000200.1    | - | 222579966 | 222579917 |
| Sma-1-3346 | NW_003026471.1 | - | 139952    | 139903    |
| Sma-1-3347 | NS_000200.1    | - | 222252185 | 222252136 |
| Sma-1-3348 | NW_003038000.1 | + | 80055     | 80104     |
| Sma-1-3349 | NS_000200.1    | + | 222550833 | 222550882 |
| Sma-1-3350 | NW_003037830.1 | + | 697208    | 697257    |
| Sma-1-3351 | NS_000200.1    | + | 68587579  | 68587628  |
| Sma-1-3352 | NW_003038001.1 | + | 31014     | 31063     |
| Sma-1-3353 | NS_000200.1    | + | 222740575 | 222740624 |
| Sma-1-3354 | NW_003037838.1 | - | 662206    | 662157    |
| Sma-1-3355 | NS_000200.1    | - | 78660769  | 78660720  |
| Sma-1-3356 | NW_003037900.1 | - | 243490    | 243441    |
| Sma-1-3357 | NS_000200.1    | - | 145372356 | 145372307 |
| Sma-1-3358 | NW_003035870.1 | + | 2409      | 2458      |
| Sma-1-3359 | NS_000200.1    | + | 335367698 | 335367747 |
| Sma-1-3360 | NW_003038010.1 | - | 392986    | 392937    |
| Sma-1-3361 | NS_000200.1    | - | 227211209 | 227211160 |
| Sma-1-3362 | NW_003038001.1 | - | 39492     | 39443     |
| Sma-1-3363 | NS_000200.1    | - | 222749053 | 222749004 |
| Sma-1-3364 | NW_003026471.1 | - | 43272     | 43223     |
| Sma-1-3365 | NS_000200.1    | - | 222155505 | 222155456 |
| Sma-1-3366 | NW_003037830.1 | - | 637263    | 637214    |
| Sma-1-3367 | NS_000200.1    | - | 68527634  | 68527585  |
| Sma-1-3368 | NW_003026471.1 | + | 94729     | 94778     |
| Sma-1-3369 | NS_000200.1    | + | 222206962 | 222207011 |
| Sma-1-3370 | NW_003038003.1 | - | 200362    | 200313    |
| Sma-1-3371 | NS_000200.1    | - | 223699644 | 223699595 |
| Sma-1-3372 | NW_003037911.1 | + | 663663    | 663712    |
| Sma-1-3373 | NS_000200.1    | + | 156451016 | 156451065 |
| Sma-1-3374 | NW_003026472.1 | - | 112078    | 112029    |
| Sma-1-3375 | NS_000200.1    | - | 236524070 | 236524021 |
| Sma-1-3376 | NW_003037905.1 | + | 839577    | 839626    |
| Sma-1-3377 | NS_000200.1    | + | 150108589 | 150108638 |
| Sma-1-3378 | NW_003037839.1 | - | 1068338   | 1068289   |
| Sma-1-3379 | NS_000200.1    | - | 80026488  | 80026439  |
| Sma-1-3380 | NW_003037799.1 | - | 1180084   | 1180035   |
| Sma-1-3381 | NS_000200.1    | - | 18170438  | 18170389  |
| Sma-1-3382 | NW_003037813.1 | + | 1965704   | 1965753   |
| Sma-1-3383 | NS_000200.1    | + | 42952567  | 42952616  |
| Sma-1-3384 | NW_003037830.1 | - | 353513    | 353464    |
| Sma-1-3385 | NS_000200.1    | - | 68243884  | 68243835  |
| Sma-1-3386 | NW_003037830.1 | - | 289543    | 289493    |
| Sma-1-3387 | NW_003037915.1 | - | 617533    | 617483    |
| Sma-1-3388 | NS_000200.1    | - | 162517519 | 162517469 |
| Sma-1-3389 | NS_000200.1    | - | 68179914  | 68179864  |

|            |                |   |           |           |
|------------|----------------|---|-----------|-----------|
| Sma-1-3390 | NW_003037839.1 | - | 362267    | 362218    |
| Sma-1-3391 | NS_000200.1    | - | 79320417  | 79320368  |
| Sma-1-3392 | NW_003037839.1 | - | 1236532   | 1236483   |
| Sma-1-3393 | NS_000200.1    | - | 80194682  | 80194633  |
| Sma-1-3394 | NW_003021694.1 | - | 1030      | 981       |
| Sma-1-3395 | NS_000200.1    | - | 348318026 | 348317977 |
| Sma-1-3396 | NW_003037839.1 | - | 1366705   | 1366656   |
| Sma-1-3397 | NS_000200.1    | - | 80324855  | 80324806  |
| Sma-1-3398 | NW_003037859.1 | - | 91752     | 91703     |
| Sma-1-3399 | NS_000200.1    | - | 102770593 | 102770544 |
| Sma-1-3400 | NW_003026472.1 | + | 326398    | 326447    |
| Sma-1-3401 | NS_000200.1    | + | 236738390 | 236738439 |
| Sma-1-3402 | NW_003037899.1 | + | 152466    | 152515    |
| Sma-1-3403 | NS_000200.1    | + | 144671577 | 144671626 |
| Sma-1-3404 | NW_003038005.1 | + | 225771    | 225820    |
| Sma-1-3405 | NS_000200.1    | + | 224631725 | 224631774 |
| Sma-1-3406 | NW_003021258.1 | - | 1057      | 1008      |
| Sma-1-3407 | NW_003037794.1 | - | 676480    | 676431    |
| Sma-1-3408 | NS_000200.1    | - | 371720929 | 371720880 |
| Sma-1-3409 | NS_000200.1    | - | 4856075   | 4856026   |
| Sma-1-3410 | NW_003038261.1 | + | 405007    | 405056    |
| Sma-1-3411 | NS_000200.1    | + | 324018658 | 324018707 |
| Sma-1-3412 | NW_003038261.1 | - | 121228    | 121179    |
| Sma-1-3413 | NS_000200.1    | - | 323734879 | 323734830 |
| Sma-1-3414 | NW_003032691.1 | - | 592       | 543       |
| Sma-1-3415 | NW_003037800.1 | - | 436688    | 436639    |
| Sma-1-3416 | NS_000200.1    | - | 353868057 | 353868008 |
| Sma-1-3417 | NS_000200.1    | - | 19066048  | 19065999  |
| Sma-1-3418 | NW_003037829.1 | + | 1816085   | 1816134   |
| Sma-1-3419 | NS_000200.1    | + | 67716623  | 67716672  |
| Sma-1-3420 | NW_003038261.1 | + | 1004358   | 1004407   |
| Sma-1-3421 | NS_000200.1    | + | 324618009 | 324618058 |
| Sma-1-3422 | NW_003038032.1 | + | 79341     | 79390     |
| Sma-1-3423 | NS_000200.1    | + | 245238501 | 245238550 |
| Sma-1-3424 | NW_003038161.1 | - | 493495    | 493446    |
| Sma-1-3425 | NS_000200.1    | - | 297863346 | 297863297 |
| Sma-1-3426 | NW_003037851.1 | - | 461146    | 461097    |
| Sma-1-3427 | NS_000200.1    | - | 93864456  | 93864407  |
| Sma-1-3428 | NW_003026472.1 | - | 430650    | 430601    |
| Sma-1-3429 | NS_000200.1    | - | 236842642 | 236842593 |
| Sma-1-3430 | NW_003037830.1 | + | 161109    | 161158    |
| Sma-1-3431 | NS_000200.1    | + | 68051480  | 68051529  |
| Sma-1-3432 | NW_003038005.1 | + | 300219    | 300268    |
| Sma-1-3433 | NS_000200.1    | + | 224706173 | 224706222 |
| Sma-1-3434 | NW_003037978.1 | - | 50372     | 50323     |
| Sma-1-3435 | NS_000200.1    | - | 209318382 | 209318333 |
| Sma-1-3436 | NW_003037978.1 | + | 459370    | 459419    |
| Sma-1-3437 | NS_000200.1    | + | 209727380 | 209727429 |
| Sma-1-3438 | NW_003029816.1 | - | 990       | 941       |
| Sma-1-3439 | NS_000200.1    | - | 376137430 | 376137381 |
| Sma-1-3440 | NW_003037858.1 | + | 472182    | 472231    |
| Sma-1-3441 | NS_000200.1    | + | 101136458 | 101136507 |



|            |                |   |           |           |
|------------|----------------|---|-----------|-----------|
| Sma-1-3442 | NW_003038027.1 | + | 568154    | 568203    |
| Sma-1-3443 | NS_000200.1    | + | 240938868 | 240938917 |
| Sma-1-3444 | NW_003037933.1 | + | 224671    | 224720    |
| Sma-1-3445 | NS_000200.1    | + | 178637843 | 178637892 |
| Sma-1-3446 | NW_003020821.1 | + | 1857      | 1906      |
| Sma-1-3447 | NS_000200.1    | + | 364522139 | 364522188 |
| Sma-1-3448 | NW_003037940.1 | - | 851787    | 851738    |
| Sma-1-3449 | NS_000200.1    | - | 184593917 | 184593868 |
| Sma-1-3450 | NW_003023619.1 | + | 4162      | 4211      |
| Sma-1-3451 | NS_000200.1    | + | 373867600 | 373867649 |
| Sma-1-3452 | NW_003020700.1 | + | 375       | 424       |
| Sma-1-3453 | NS_000200.1    | + | 360687979 | 360688028 |
| Sma-1-3454 | NW_003032147.1 | - | 986       | 937       |
| Sma-1-3455 | NS_000200.1    | - | 379063260 | 379063211 |
| Sma-1-3456 | NW_003020811.1 | + | 2495      | 2544      |
| Sma-1-3457 | NS_000200.1    | + | 364503734 | 364503783 |
| Sma-1-3458 | NW_003037830.1 | - | 1478044   | 1477995   |
| Sma-1-3459 | NS_000200.1    | - | 69368415  | 69368366  |
| Sma-1-3460 | NW_003037839.1 | + | 800093    | 800142    |
| Sma-1-3461 | NS_000200.1    | + | 79758243  | 79758292  |
| Sma-1-3462 | NW_003037839.1 | + | 872917    | 872966    |
| Sma-1-3463 | NS_000200.1    | + | 79831067  | 79831116  |
| Sma-1-3464 | NW_003037839.1 | + | 923932    | 923981    |
| Sma-1-3465 | NS_000200.1    | + | 79882082  | 79882131  |
| Sma-1-3466 | NW_003037840.1 | - | 1286964   | 1286915   |
| Sma-1-3467 | NS_000200.1    | - | 81910288  | 81910239  |
| Sma-1-3468 | NW_003038067.1 | - | 118630    | 118581    |
| Sma-1-3469 | NS_000200.1    | - | 262972683 | 262972634 |
| Sma-1-3470 | NW_003037844.1 | + | 231508    | 231557    |
| Sma-1-3471 | NS_000200.1    | + | 86414954  | 86415003  |
| Sma-1-3472 | NW_003020545.1 | + | 58        | 107       |
| Sma-1-3473 | NS_000200.1    | + | 360113453 | 360113502 |
| Sma-1-3474 | NW_003026478.1 | - | 22656     | 22607     |
| Sma-1-3475 | NS_000200.1    | - | 254224205 | 254224156 |
| Sma-1-3476 | NW_003038042.1 | + | 89357     | 89406     |
| Sma-1-3477 | NS_000200.1    | + | 254034956 | 254035005 |
| Sma-1-3478 | NW_003037840.1 | + | 1837805   | 1837854   |
| Sma-1-3479 | NS_000200.1    | + | 82461129  | 82461178  |
| Sma-1-3480 | NW_003037978.1 | + | 167836    | 167885    |
| Sma-1-3481 | NS_000200.1    | + | 209435846 | 209435895 |
| Sma-1-3482 | NW_003037977.1 | + | 976708    | 976757    |
| Sma-1-3483 | NS_000200.1    | + | 209262728 | 209262777 |
| Sma-1-3484 | NW_003037830.1 | + | 1121642   | 1121691   |
| Sma-1-3485 | NS_000200.1    | + | 69012013  | 69012062  |
| Sma-1-3486 | NW_003026481.1 | + | 81738     | 81787     |
| Sma-1-3487 | NS_000200.1    | + | 255481722 | 255481771 |
| Sma-1-3488 | NW_003020305.1 | - | 975       | 926       |
| Sma-1-3489 | NW_003034538.1 | - | 2932      | 2883      |
| Sma-1-3490 | NS_000200.1    | - | 371379835 | 371379786 |
| Sma-1-3491 | NS_000200.1    | - | 326882494 | 326882445 |
| Sma-1-3492 | NW_003037840.1 | - | 438708    | 438659    |
| Sma-1-3493 | NS_000200.1    | - | 81062032  | 81061983  |

|            |                   |   |           |           |
|------------|-------------------|---|-----------|-----------|
| Sma-1-3494 | NW_003026483.1    | + | 120971    | 121020    |
| Sma-1-3495 | NS_000200.1       | + | 256635495 | 256635544 |
| Tcr-1-2    | NZ_AAHK01020178.1 | - | 695       | 646       |
| Sma-1-3496 | NW_003039071.1    | + | 648       | 697       |
| Sma-1-3497 | NS_000200.1       | + | 359889966 | 359890015 |
| Sma-1-3498 | NW_003037841.1    | - | 1240662   | 1240613   |
| Sma-1-3499 | NS_000200.1       | - | 83851843  | 83851794  |
| Sma-1-3500 | NW_003038509.1    | - | 304147    | 304098    |
| Sma-1-3501 | NS_000200.1       | - | 337936599 | 337936550 |
| Sma-1-3502 | NW_003037912.1    | + | 1068034   | 1068083   |
| Sma-1-3503 | NS_000200.1       | + | 157879609 | 157879658 |
| Sma-1-3504 | NW_003037937.1    | - | 374253    | 374204    |
| Sma-1-3505 | NS_000200.1       | - | 181574162 | 181574113 |
| Sma-1-3506 | NW_003038122.1    | - | 16729     | 16680     |
| Sma-1-3507 | NS_000200.1       | - | 278535956 | 278535907 |
| Sma-1-3508 | NW_003037976.1    | + | 155732    | 155781    |
| Sma-1-3509 | NS_000200.1       | + | 206770047 | 206770096 |
| Sma-1-3510 | NW_003036393.1    | - | 9111      | 9062      |
| Sma-1-3511 | NS_000200.1       | - | 359846466 | 359846417 |
| Sma-1-3512 | NW_003026456.1    | - | 232067    | 232018    |
| Sma-1-3513 | NS_000200.1       | - | 58155203  | 58155154  |
| Sma-1-3514 | NW_003026510.1    | + | 189125    | 189174    |
| Sma-1-3515 | NS_000200.1       | + | 283629306 | 283629355 |
| Sma-1-3516 | NW_003037805.1    | + | 1316575   | 1316624   |
| Sma-1-3517 | NS_000200.1       | + | 27874419  | 27874468  |
| Sma-1-3518 | NW_003037805.1    | - | 1343094   | 1343045   |
| Sma-1-3519 | NS_000200.1       | - | 27900938  | 27900889  |
| Sma-1-3520 | NW_003037906.1    | + | 580926    | 580975    |
| Sma-1-3521 | NS_000200.1       | + | 150888705 | 150888754 |
| Sma-1-3522 | NW_003026488.1    | - | 166644    | 166595    |
| Sma-1-3523 | NS_000200.1       | - | 263673138 | 263673089 |
| Sma-1-3524 | NW_003037793.1    | + | 2676664   | 2676713   |
| Sma-1-3525 | NS_000200.1       | + | 2676664   | 2676713   |
| Sma-1-3526 | NW_003037938.1    | + | 196884    | 196933    |
| Sma-1-3527 | NS_000200.1       | + | 182233997 | 182234046 |
| Sma-1-3528 | NW_003038082.1    | + | 627563    | 627612    |
| Sma-1-3529 | NS_000200.1       | + | 270162786 | 270162835 |
| Sma-1-3530 | NW_003037875.1    | - | 366655    | 366606    |
| Sma-1-3531 | NS_000200.1       | - | 120395324 | 120395275 |
| Sma-1-3532 | NW_003038008.1    | - | 604706    | 604657    |
| Sma-1-3533 | NS_000200.1       | - | 226277802 | 226277753 |
| Sma-1-3534 | NW_003037841.1    | - | 1770665   | 1770616   |
| Sma-1-3535 | NS_000200.1       | - | 84381846  | 84381797  |
| Sma-1-3536 | NW_003037896.1    | - | 386193    | 386144    |
| Sma-1-3537 | NS_000200.1       | - | 143306616 | 143306567 |
| Sma-1-3538 | NW_003037841.1    | - | 240621    | 240572    |
| Sma-1-3539 | NS_000200.1       | - | 82851802  | 82851753  |
| Sma-1-3540 | NW_003037917.1    | + | 929272    | 929321    |
| Sma-1-3541 | NS_000200.1       | + | 165966076 | 165966125 |
| Sma-1-3542 | NW_003037829.1    | - | 1892167   | 1892118   |
| Sma-1-3543 | NS_000200.1       | - | 67792705  | 67792656  |
| Sma-1-3544 | NW_003037842.1    | - | 15841     | 15792     |

|            |                |   |           |           |
|------------|----------------|---|-----------|-----------|
| Sma-1-3545 | NS_000200.1    | - | 85115031  | 85114982  |
| Sma-1-3546 | NW_003038009.1 | + | 133971    | 134020    |
| Sma-1-3547 | NS_000200.1    | + | 226508034 | 226508083 |
| Sma-1-3548 | NW_003037844.1 | - | 274734    | 274685    |
| Sma-1-3549 | NS_000200.1    | - | 86458180  | 86458131  |
| Sma-1-3550 | NW_003037806.1 | + | 1511885   | 1511934   |
| Sma-1-3551 | NS_000200.1    | + | 29707099  | 29707148  |
| Sma-1-3552 | NW_003026502.1 | + | 114536    | 114585    |
| Sma-1-3553 | NS_000200.1    | + | 276150972 | 276151021 |
| Sma-1-3554 | NW_003037906.1 | + | 601129    | 601178    |
| Sma-1-3555 | NS_000200.1    | + | 150908908 | 150908957 |
| Sma-1-3556 | NW_003037844.1 | - | 404009    | 403960    |
| Sma-1-3557 | NS_000200.1    | - | 86587455  | 86587406  |
| Sma-1-3558 | NW_003038009.1 | - | 319060    | 319011    |
| Sma-1-3559 | NS_000200.1    | - | 226693123 | 226693074 |
| Sma-1-3560 | NW_003026504.1 | + | 67759     | 67808     |
| Sma-1-3561 | NS_000200.1    | + | 276984525 | 276984574 |
| Sma-1-3562 | NW_003037906.1 | + | 622547    | 622596    |
| Sma-1-3563 | NS_000200.1    | + | 150930326 | 150930375 |
| Sma-1-3564 | NW_003037894.1 | + | 359462    | 359511    |
| Sma-1-3565 | NS_000200.1    | + | 142256035 | 142256084 |
| Sma-1-3566 | NW_003037845.1 | + | 273039    | 273088    |
| Sma-1-3567 | NS_000200.1    | + | 87274942  | 87274991  |
| Sma-1-3568 | NW_003037791.1 | + | 690683    | 690732    |
| Sma-1-3569 | NS_000200.1    | + | 382396111 | 382396160 |
| Sma-1-3570 | NW_003037807.1 | + | 66184     | 66233     |
| Sma-1-3571 | NS_000200.1    | + | 30327700  | 30327749  |
| Sma-1-3572 | NW_003038044.1 | + | 129243    | 129292    |
| Sma-1-3573 | NS_000200.1    | + | 254754025 | 254754074 |
| Sma-1-3574 | NW_003037852.1 | + | 579517    | 579566    |
| Sma-1-3575 | NS_000200.1    | + | 94971412  | 94971461  |
| Sma-1-3576 | NW_003037793.1 | + | 3039247   | 3039296   |
| Sma-1-3577 | NS_000200.1    | + | 3039247   | 3039296   |
| Sma-1-3578 | NW_003037846.1 | - | 182616    | 182567    |
| Sma-1-3579 | NS_000200.1    | - | 87817186  | 87817137  |
| Sma-1-3580 | NW_003037874.1 | - | 179445    | 179396    |
| Sma-1-3581 | NS_000200.1    | - | 119604395 | 119604346 |
| Sma-1-3582 | NW_003037809.1 | + | 2107625   | 2107674   |
| Sma-1-3583 | NS_000200.1    | + | 35772089  | 35772138  |
| Sma-1-3584 | NW_003037806.1 | - | 253672    | 253623    |
| Sma-1-3585 | NS_000200.1    | - | 28448886  | 28448837  |
| Sma-1-3586 | NW_003037846.1 | + | 320334    | 320383    |
| Sma-1-3587 | NS_000200.1    | + | 87954904  | 87954953  |
| Sma-1-3588 | NW_003037797.1 | + | 1409156   | 1409205   |
| Sma-1-3589 | NS_000200.1    | + | 11837016  | 11837065  |
| Sma-1-3590 | NW_003037806.1 | - | 626355    | 626306    |
| Sma-1-3591 | NS_000200.1    | - | 28821569  | 28821520  |
| Sma-1-3592 | NW_003038070.1 | + | 51992     | 52041     |
| Sma-1-3593 | NS_000200.1    | + | 264389233 | 264389282 |
| Sma-1-3594 | NW_003037846.1 | + | 825755    | 825804    |
| Sma-1-3595 | NS_000200.1    | + | 88460325  | 88460374  |
| Sma-1-3596 | NW_003037846.1 | + | 920671    | 920720    |

|            |                |   |           |           |
|------------|----------------|---|-----------|-----------|
| Sma-1-3597 | NS_000200.1    | + | 88555241  | 88555290  |
| Sma-1-3598 | NW_003037891.1 | + | 621926    | 621975    |
| Sma-1-3599 | NS_000200.1    | + | 138503204 | 138503253 |
| Sma-1-3600 | NW_003038014.1 | - | 470412    | 470363    |
| Sma-1-3601 | NS_000200.1    | - | 230211101 | 230211052 |
| Sma-1-3602 | NW_003038115.1 | - | 91363     | 91314     |
| Sma-1-3603 | NS_000200.1    | - | 277146658 | 277146609 |
| Sma-1-3604 | NW_003038052.1 | + | 7540      | 7589      |
| Sma-1-3605 | NS_000200.1    | + | 257055016 | 257055065 |
| Sma-1-3606 | NW_003037891.1 | + | 1594312   | 1594361   |
| Sma-1-3607 | NS_000200.1    | + | 139475590 | 139475639 |
| Sma-1-3608 | NW_003026511.1 | - | 184210    | 184161    |
| Sma-1-3609 | NS_000200.1    | - | 284567262 | 284567213 |
| Sma-1-3610 | NW_003037916.1 | - | 1478302   | 1478253   |
| Sma-1-3611 | NS_000200.1    | - | 164671713 | 164671664 |
| Sma-1-3612 | NW_003037848.1 | - | 1063038   | 1062989   |
| Sma-1-3613 | NS_000200.1    | - | 90756109  | 90756060  |
| Sma-1-3614 | NW_003037891.1 | + | 1956186   | 1956235   |
| Sma-1-3615 | NS_000200.1    | + | 139837464 | 139837513 |
| Sma-1-3616 | NW_003038025.1 | - | 65470     | 65421     |
| Sma-1-3617 | NS_000200.1    | - | 238923715 | 238923666 |
| Sma-1-3618 | NW_003026458.1 | + | 531893    | 531942    |
| Sma-1-3619 | NS_000200.1    | + | 102400123 | 102400172 |
| Sma-1-3620 | NW_003038009.1 | + | 371339    | 371388    |
| Sma-1-3621 | NW_003038009.1 | - | 368769    | 368720    |
| Sma-1-3622 | NW_003038009.1 | - | 367039    | 366990    |
| Sma-1-3623 | NS_000200.1    | + | 226745402 | 226745451 |
| Sma-1-3624 | NS_000200.1    | - | 226742832 | 226742783 |
| Sma-1-3625 | NS_000200.1    | - | 226741102 | 226741053 |
| Sma-1-3626 | NW_003037850.1 | + | 1289003   | 1289052   |
| Sma-1-3627 | NS_000200.1    | + | 93275033  | 93275082  |
| Sma-1-3628 | NW_003026514.1 | - | 25130     | 25081     |
| Sma-1-3629 | NS_000200.1    | - | 288483817 | 288483768 |
| Sma-1-3630 | NW_003037891.1 | - | 1835054   | 1835005   |
| Sma-1-3631 | NS_000200.1    | - | 139716332 | 139716283 |
| Sma-1-3632 | NW_003037891.1 | + | 1593439   | 1593488   |
| Sma-1-3633 | NS_000200.1    | + | 139474717 | 139474766 |
| Sma-1-3634 | NW_003037891.1 | + | 1599189   | 1599238   |
| Sma-1-3635 | NS_000200.1    | + | 139480467 | 139480516 |
| Sma-1-3636 | NW_003037946.1 | + | 850796    | 850845    |
| Sma-1-3637 | NS_000200.1    | + | 191544656 | 191544705 |
| Sma-1-3638 | NW_003037809.1 | - | 2492122   | 2492073   |
| Sma-1-3639 | NS_000200.1    | - | 36156586  | 36156537  |
| Sma-1-3640 | NW_003037909.1 | + | 273708    | 273757    |
| Sma-1-3641 | NS_000200.1    | + | 153815357 | 153815406 |
| Sma-1-3642 | NW_003037851.1 | + | 428453    | 428502    |
| Sma-1-3643 | NW_003037909.1 | + | 281086    | 281135    |
| Sma-1-3644 | NS_000200.1    | + | 93831763  | 93831812  |
| Sma-1-3645 | NS_000200.1    | + | 153822735 | 153822784 |
| Sma-1-3646 | NW_003037907.1 | + | 630930    | 630979    |
| Sma-1-3647 | NS_000200.1    | + | 152035419 | 152035468 |
| Sma-1-3648 | NW_003037827.1 | - | 678780    | 678731    |

|            |                |   |           |           |
|------------|----------------|---|-----------|-----------|
| Sma-1-3649 | NS_000200.1    | - | 63300921  | 63300872  |
| Sma-1-3650 | NW_003026516.1 | + | 2701      | 2750      |
| Sma-1-3651 | NS_000200.1    | + | 299110998 | 299111047 |
| Sma-1-3652 | NW_003037806.1 | + | 612309    | 612358    |
| Sma-1-3653 | NS_000200.1    | + | 28807523  | 28807572  |
| Sma-1-3654 | NW_003037891.1 | + | 1214871   | 1214920   |
| Sma-1-3655 | NS_000200.1    | + | 139096149 | 139096198 |
| Sma-1-3656 | NW_003037976.1 | - | 284985    | 284936    |
| Sma-1-3657 | NS_000200.1    | - | 206899300 | 206899251 |
| Sma-1-3658 | NW_003037915.1 | - | 560523    | 560474    |
| Sma-1-3659 | NS_000200.1    | - | 162460509 | 162460460 |
| Sma-1-3660 | NW_003037890.1 | + | 987465    | 987514    |
| Sma-1-3661 | NS_000200.1    | + | 136670826 | 136670875 |
| Sma-1-3662 | NW_003037933.1 | + | 570144    | 570193    |
| Sma-1-3663 | NS_000200.1    | + | 178983316 | 178983365 |
| Sma-1-3664 | NW_003037938.1 | + | 182784    | 182833    |
| Sma-1-3665 | NS_000200.1    | + | 182219897 | 182219946 |
| Sma-1-3666 | NW_003037795.1 | - | 436316    | 436267    |
| Sma-1-3667 | NS_000200.1    | - | 6827199   | 6827150   |
| Sma-1-3668 | NW_003037969.1 | - | 236990    | 236941    |
| Sma-1-3669 | NS_000200.1    | - | 200843117 | 200843068 |
| Sma-1-3670 | NW_003038010.1 | - | 364929    | 364880    |
| Sma-1-3671 | NS_000200.1    | - | 227183152 | 227183103 |
| Sma-1-3672 | NW_003038161.1 | + | 476427    | 476476    |
| Sma-1-3673 | NS_000200.1    | + | 297846278 | 297846327 |
| Sma-1-3674 | NW_003038049.1 | + | 35383     | 35432     |
| Sma-1-3675 | NS_000200.1    | + | 256010910 | 256010959 |
| Sma-1-3676 | NW_003038010.1 | + | 385259    | 385308    |
| Sma-1-3677 | NS_000200.1    | + | 227203482 | 227203531 |
| Sma-1-3678 | NW_003037818.1 | - | 399174    | 399125    |
| Sma-1-3679 | NS_000200.1    | - | 49114581  | 49114532  |
| Sma-1-3680 | NW_003037810.1 | - | 376014    | 375965    |
| Sma-1-3681 | NS_000200.1    | - | 36980536  | 36980487  |
| Sma-1-3682 | NW_003037890.1 | + | 654234    | 654283    |
| Sma-1-3683 | NS_000200.1    | + | 136337595 | 136337644 |
| Sma-1-3684 | NW_003038122.1 | - | 37596     | 37547     |
| Sma-1-3685 | NS_000200.1    | - | 278556823 | 278556774 |
| Sma-1-3686 | NW_003037913.1 | - | 380109    | 380060    |
| Sma-1-3687 | NS_000200.1    | - | 158943860 | 158943811 |
| Sma-1-3688 | NW_003037878.1 | + | 765267    | 765316    |
| Sma-1-3689 | NS_000200.1    | + | 122818745 | 122818794 |
| Sma-1-3690 | NW_003026517.1 | + | 417898    | 417947    |
| Sma-1-3691 | NS_000200.1    | + | 300023907 | 300023956 |
| Sma-1-3692 | NW_003037861.1 | + | 113436    | 113485    |
| Sma-1-3693 | NS_000200.1    | + | 104889890 | 104889939 |
| Sma-1-3694 | NW_003038517.1 | + | 107049    | 107098    |
| Sma-1-3695 | NS_000200.1    | + | 340871537 | 340871586 |
| Sma-1-3696 | NW_003038511.1 | - | 195849    | 195800    |
| Sma-1-3697 | NS_000200.1    | - | 338541061 | 338541012 |
| Sma-1-3698 | NW_003026517.1 | - | 465373    | 465324    |
| Sma-1-3699 | NS_000200.1    | - | 300071382 | 300071333 |
| Sma-1-3700 | NW_003037827.1 | - | 406813    | 406764    |

|            |                |   |           |           |
|------------|----------------|---|-----------|-----------|
| Sma-1-3701 | NS_000200.1    | - | 63028954  | 63028905  |
| Sma-1-3702 | NW_003038050.1 | + | 121392    | 121441    |
| Sma-1-3703 | NS_000200.1    | + | 256396286 | 256396335 |
| Sma-1-3704 | NW_003037795.1 | - | 1156933   | 1156884   |
| Sma-1-3705 | NS_000200.1    | - | 7547816   | 7547767   |
| Sma-1-3706 | NW_003037890.1 | + | 587552    | 587601    |
| Sma-1-3707 | NS_000200.1    | + | 136270913 | 136270962 |
| Sma-1-3708 | NW_003037852.1 | - | 464280    | 464231    |
| Sma-1-3709 | NS_000200.1    | - | 94856175  | 94856126  |
| Sma-1-3710 | NW_003038011.1 | - | 221041    | 220992    |
| Sma-1-3711 | NS_000200.1    | - | 227748691 | 227748642 |
| Sma-1-3712 | NW_003038011.1 | - | 270285    | 270236    |
| Sma-1-3713 | NS_000200.1    | - | 227797935 | 227797886 |
| Sma-1-3714 | NW_003037873.1 | + | 580610    | 580659    |
| Sma-1-3715 | NS_000200.1    | + | 119319738 | 119319787 |
| Sma-1-3716 | NW_003037915.1 | + | 737391    | 737440    |
| Sma-1-3717 | NS_000200.1    | + | 162637377 | 162637426 |
| Sma-1-3718 | NW_003026557.1 | + | 136       | 185       |
| Sma-1-3719 | NS_000200.1    | + | 300988179 | 300988228 |
| Sma-1-3720 | NW_003038163.1 | - | 241774    | 241725    |
| Sma-1-3721 | NS_000200.1    | - | 298642054 | 298642005 |
| Sma-1-3722 | NW_003038163.1 | - | 297939    | 297890    |
| Sma-1-3723 | NS_000200.1    | - | 298698219 | 298698170 |
| Sma-1-3724 | NW_003038011.1 | + | 626845    | 626894    |
| Sma-1-3725 | NS_000200.1    | + | 228154495 | 228154544 |
| Sma-1-3726 | NW_003038011.1 | + | 742725    | 742774    |
| Sma-1-3727 | NW_003038011.1 | + | 756557    | 756606    |
| Sma-1-3728 | NS_000200.1    | + | 228270375 | 228270424 |
| Sma-1-3729 | NS_000200.1    | + | 228284207 | 228284256 |
| Sma-1-3730 | NW_003038012.1 | + | 359002    | 359051    |
| Sma-1-3731 | NS_000200.1    | + | 228682941 | 228682990 |
| Sma-1-3732 | NW_003038060.1 | + | 235113    | 235162    |
| Sma-1-3733 | NS_000200.1    | + | 260800238 | 260800287 |
| Sma-1-3734 | NW_003037908.1 | - | 134129    | 134080    |
| Sma-1-3735 | NS_000200.1    | - | 152607260 | 152607211 |
| Sma-1-3736 | NW_003026581.1 | + | 3895      | 3944      |
| Sma-1-3737 | NS_000200.1    | + | 302833883 | 302833932 |
| Sma-1-3738 | NW_003037795.1 | + | 1224497   | 1224546   |
| Sma-1-3739 | NS_000200.1    | + | 7615380   | 7615429   |
| Sma-1-3740 | NW_003037975.1 | + | 399058    | 399107    |
| Sma-1-3741 | NS_000200.1    | + | 205981282 | 205981331 |
| Sma-1-3742 | NW_003037933.1 | - | 34891     | 34842     |
| Sma-1-3743 | NS_000200.1    | - | 178448063 | 178448014 |
| Sma-1-3744 | NW_003037853.1 | + | 576509    | 576558    |
| Sma-1-3745 | NS_000200.1    | + | 96068560  | 96068609  |
| Sma-1-3746 | NW_003037909.1 | + | 746399    | 746448    |
| Sma-1-3747 | NS_000200.1    | + | 154288048 | 154288097 |
| Sma-1-3748 | NW_003038252.1 | - | 112510    | 112461    |
| Sma-1-3749 | NS_000200.1    | - | 318968098 | 318968049 |
| Sma-1-3750 | NW_003037944.1 | + | 232294    | 232343    |
| Sma-1-3751 | NS_000200.1    | + | 188453647 | 188453696 |
| Sma-1-3752 | NW_003022712.1 | + | 409       | 458       |

|            |                |   |           |           |
|------------|----------------|---|-----------|-----------|
| Sma-1-3753 | NS.000200.1    | + | 367967712 | 367967761 |
| Sma-1-3754 | NW_003037890.1 | + | 2055227   | 2055276   |
| Sma-1-3755 | NS.000200.1    | + | 137738588 | 137738637 |
| Sma-1-3756 | NW_003038187.1 | + | 131066    | 131115    |
| Sma-1-3757 | NS.000200.1    | + | 302082924 | 302082973 |
| Sma-1-3758 | NW_003038147.1 | + | 225188    | 225237    |
| Sma-1-3759 | NS.000200.1    | + | 289752931 | 289752980 |
| Sma-1-3760 | NW_003037825.1 | + | 1403677   | 1403726   |
| Sma-1-3761 | NS.000200.1    | + | 60533459  | 60533508  |
| Sma-1-3762 | NW_003033971.1 | - | 1222      | 1173      |
| Sma-1-3763 | NS.000200.1    | - | 363328822 | 363328773 |
| Sma-1-3764 | NW_003037871.1 | - | 369200    | 369151    |
| Sma-1-3765 | NW_003038261.1 | - | 433733    | 433684    |
| Sma-1-3766 | NS.000200.1    | - | 324047384 | 324047335 |
| Sma-1-3767 | NS.000200.1    | - | 117816938 | 117816889 |
| Sma-1-3768 | NW_003037938.1 | + | 821070    | 821119    |
| Sma-1-3769 | NS.000200.1    | + | 182858183 | 182858232 |
| Sma-1-3770 | NW_003037975.1 | + | 1017632   | 1017681   |
| Sma-1-3771 | NS.000200.1    | + | 206599856 | 206599905 |
| Sma-1-3772 | NW_003026596.1 | - | 179800    | 179751    |
| Sma-1-3773 | NS.000200.1    | - | 305450428 | 305450379 |
| Sma-1-3774 | NW_003038187.1 | + | 25006     | 25055     |
| Sma-1-3775 | NS.000200.1    | + | 301976864 | 301976913 |
| Sma-1-3776 | NW_003038013.1 | - | 230535    | 230486    |
| Sma-1-3777 | NS.000200.1    | - | 229620161 | 229620112 |
| Sma-1-3778 | NW_003037937.1 | + | 806236    | 806285    |
| Sma-1-3779 | NW_003037937.1 | - | 806520    | 806471    |
| Sma-1-3780 | NS.000200.1    | + | 182006145 | 182006194 |
| Sma-1-3781 | NS.000200.1    | - | 182006429 | 182006380 |
| Sma-1-3782 | NW_003038064.1 | + | 154693    | 154742    |
| Sma-1-3783 | NS.000200.1    | + | 261991270 | 261991319 |
| Sma-1-3784 | NW_003038192.1 | - | 5329      | 5280      |
| Sma-1-3785 | NS.000200.1    | - | 302567236 | 302567187 |
| Sma-1-3786 | NW_003035836.1 | - | 455       | 406       |
| Sma-1-3787 | NS.000200.1    | - | 364192196 | 364192147 |
| Sma-1-3788 | NW_003037852.1 | + | 675528    | 675577    |
| Sma-1-3789 | NS.000200.1    | + | 95067423  | 95067472  |
| Sma-1-3790 | NW_003038070.1 | + | 444723    | 444772    |
| Sma-1-3791 | NS.000200.1    | + | 264781964 | 264782013 |
| Sma-1-3792 | NW_003026598.1 | + | 70867     | 70916     |
| Sma-1-3793 | NS.000200.1    | + | 305841083 | 305841132 |
| Sma-1-3794 | NW_003038014.1 | + | 12335     | 12384     |
| Sma-1-3795 | NS.000200.1    | + | 229753024 | 229753073 |
| Sma-1-3796 | NW_003037853.1 | + | 545778    | 545827    |
| Sma-1-3797 | NS.000200.1    | + | 96037829  | 96037878  |
| Sma-1-3798 | NW_003026599.1 | - | 6942      | 6893      |
| Sma-1-3799 | NS.000200.1    | - | 305885271 | 305885222 |
| Sma-1-3800 | NW_003037933.1 | - | 217477    | 217428    |
| Sma-1-3801 | NS.000200.1    | - | 178630649 | 178630600 |
| Sma-1-3802 | NW_003037915.1 | + | 55600     | 55649     |
| Sma-1-3803 | NS.000200.1    | + | 161955586 | 161955635 |
| Sma-1-3804 | NW_003037908.1 | + | 177361    | 177410    |

|            |                |   |           |           |
|------------|----------------|---|-----------|-----------|
| Sma-1-3805 | NS_000200.1    | + | 152650492 | 152650541 |
| Sma-1-3806 | NW_003038202.1 | + | 22663     | 22712     |
| Sma-1-3807 | NS_000200.1    | + | 304280909 | 304280958 |
| Sma-1-3808 | NW_003038131.1 | - | 65917     | 65868     |
| Sma-1-3809 | NS_000200.1    | - | 282027761 | 282027712 |
| Sma-1-3810 | NW_003038206.1 | + | 35290     | 35339     |
| Sma-1-3811 | NS_000200.1    | + | 304862054 | 304862103 |
| Sma-1-3812 | NW_003037973.1 | - | 545213    | 545164    |
| Sma-1-3813 | NS_000200.1    | - | 204526940 | 204526891 |
| Sma-1-3814 | NW_003037890.1 | + | 1150402   | 1150451   |
| Sma-1-3815 | NS_000200.1    | + | 136833763 | 136833812 |
| Sma-1-3816 | NW_003037810.1 | - | 240284    | 240235    |
| Sma-1-3817 | NS_000200.1    | - | 36844806  | 36844757  |
| Sma-1-3818 | NW_003037798.1 | - | 1263053   | 1263004   |
| Sma-1-3819 | NS_000200.1    | - | 15522211  | 15522162  |
| Sma-1-3820 | NW_003037918.1 | - | 2205442   | 2205393   |
| Sma-1-3821 | NS_000200.1    | - | 168772432 | 168772383 |
| Sma-1-3822 | NW_003026608.1 | + | 18456     | 18505     |
| Sma-1-3823 | NS_000200.1    | + | 309296576 | 309296625 |
| Sma-1-3824 | NW_003037889.1 | - | 881546    | 881497    |
| Sma-1-3825 | NS_000200.1    | - | 134658036 | 134657987 |
| Sma-1-3826 | NW_003037795.1 | + | 1398605   | 1398654   |
| Sma-1-3827 | NS_000200.1    | + | 7789488   | 7789537   |
| Sma-1-3828 | NW_003037889.1 | + | 868468    | 868517    |
| Sma-1-3829 | NS_000200.1    | + | 134644958 | 134645007 |
| Sma-1-3830 | NW_003037936.1 | + | 392531    | 392580    |
| Sma-1-3831 | NS_000200.1    | + | 180832260 | 180832309 |
| Sma-1-3832 | NW_003038014.1 | + | 394169    | 394218    |
| Sma-1-3833 | NS_000200.1    | + | 230134858 | 230134907 |
| Sma-1-3834 | NW_003037827.1 | + | 120114    | 120163    |
| Sma-1-3835 | NS_000200.1    | + | 62742255  | 62742304  |
| Sma-1-3836 | NW_003038014.1 | + | 515287    | 515336    |
| Sma-1-3837 | NW_003038014.1 | + | 515792    | 515841    |
| Sma-1-3838 | NS_000200.1    | + | 230255976 | 230256025 |
| Sma-1-3839 | NS_000200.1    | + | 230256481 | 230256530 |
| Sma-1-3840 | NW_003037854.1 | - | 1092632   | 1092583   |
| Sma-1-3841 | NS_000200.1    | - | 97997053  | 97997004  |
| Sma-1-3842 | NW_003037972.1 | - | 814848    | 814799    |
| Sma-1-3843 | NS_000200.1    | - | 203290552 | 203290503 |
| Sma-1-3844 | NW_003038015.1 | + | 48598     | 48647     |
| Sma-1-3845 | NS_000200.1    | + | 230372088 | 230372137 |
| Sma-1-3846 | NW_003037908.1 | + | 316568    | 316617    |
| Sma-1-3847 | NS_000200.1    | + | 152789699 | 152789748 |
| Sma-1-3848 | NW_003038015.1 | + | 509442    | 509491    |
| Sma-1-3849 | NS_000200.1    | + | 230832932 | 230832981 |
| Sma-1-3850 | NW_003038116.1 | + | 46451     | 46500     |
| Sma-1-3851 | NW_003038116.1 | - | 38233     | 38184     |
| Sma-1-3852 | NS_000200.1    | + | 277261729 | 277261778 |
| Sma-1-3853 | NS_000200.1    | - | 277253511 | 277253462 |
| Sma-1-3854 | NW_003026609.1 | - | 96983     | 96934     |
| Sma-1-3855 | NS_000200.1    | - | 309751975 | 309751926 |
| Sma-1-3856 | NW_003037889.1 | + | 647483    | 647532    |



|            |                |   |           |           |
|------------|----------------|---|-----------|-----------|
| Sma-1-3857 | NS_000200.1    | + | 134423973 | 134424022 |
| Sma-1-3858 | NW_003037972.1 | - | 494873    | 494824    |
| Sma-1-3859 | NS_000200.1    | - | 202970577 | 202970528 |
| Sma-1-3860 | NW_003037797.1 | - | 1663278   | 1663229   |
| Sma-1-3861 | NS_000200.1    | - | 12091138  | 12091089  |
| Sma-1-3862 | NW_003038239.1 | + | 9500      | 9549      |
| Sma-1-3863 | NS_000200.1    | + | 313850282 | 313850331 |
| Sma-1-3864 | NW_003036007.1 | + | 1280      | 1329      |
| Sma-1-3865 | NS_000200.1    | + | 343250489 | 343250538 |
| Sma-1-3866 | NW_003037915.1 | - | 66544     | 66495     |
| Sma-1-3867 | NS_000200.1    | - | 161966530 | 161966481 |
| Sma-1-3868 | NW_003037972.1 | + | 485157    | 485206    |
| Sma-1-3869 | NS_000200.1    | + | 202960861 | 202960910 |
| Sma-1-3870 | NW_003037826.1 | + | 631933    | 631982    |
| Sma-1-3871 | NS_000200.1    | + | 61631449  | 61631498  |
| Sma-1-3872 | NW_003037908.1 | + | 911430    | 911479    |
| Sma-1-3873 | NS_000200.1    | + | 153384561 | 153384610 |
| Sma-1-3874 | NW_003038161.1 | + | 120603    | 120652    |
| Sma-1-3875 | NS_000200.1    | + | 297490454 | 297490503 |
| Sma-1-3876 | NW_003037889.1 | - | 1857781   | 1857732   |
| Sma-1-3877 | NS_000200.1    | - | 135634271 | 135634222 |
| Sma-1-3878 | NW_003026611.1 | - | 215167    | 215118    |
| Sma-1-3879 | NS_000200.1    | - | 310784951 | 310784902 |
| Sma-1-3880 | NW_003038068.1 | - | 192280    | 192231    |
| Sma-1-3881 | NS_000200.1    | - | 263259488 | 263259439 |
| Sma-1-3882 | NW_003037826.1 | + | 403308    | 403357    |
| Sma-1-3883 | NS_000200.1    | + | 61402824  | 61402873  |
| Sma-1-3884 | NW_003038018.1 | - | 637506    | 637457    |
| Sma-1-3885 | NS_000200.1    | - | 233038356 | 233038307 |
| Sma-1-3886 | NW_003026612.1 | + | 175203    | 175252    |
| Sma-1-3887 | NS_000200.1    | + | 312480590 | 312480639 |
| Sma-1-3888 | NW_003037936.1 | - | 260205    | 260156    |
| Sma-1-3889 | NS_000200.1    | - | 180699934 | 180699885 |
| Sma-1-3890 | NW_003037935.1 | - | 913758    | 913709    |
| Sma-1-3891 | NS_000200.1    | - | 180330293 | 180330244 |
| Sma-1-3892 | NW_003038254.1 | - | 341736    | 341687    |
| Sma-1-3893 | NS_000200.1    | - | 320377294 | 320377245 |
| Sma-1-3894 | NW_003037797.1 | + | 1458420   | 1458469   |
| Sma-1-3895 | NS_000200.1    | + | 11886280  | 11886329  |
| Sma-1-3896 | NW_003038068.1 | + | 248399    | 248448    |
| Sma-1-3897 | NS_000200.1    | + | 263315607 | 263315656 |
| Sma-1-3898 | NW_003037826.1 | - | 1798      | 1749      |
| Sma-1-3899 | NS_000200.1    | - | 61001314  | 61001265  |
| Sma-1-3900 | NW_003037826.1 | + | 173991    | 174040    |
| Sma-1-3901 | NS_000200.1    | + | 61173507  | 61173556  |
| Sma-1-3902 | NW_003038221.1 | - | 70795     | 70746     |
| Sma-1-3903 | NS_000200.1    | - | 308712059 | 308712010 |
| Sma-1-3904 | NW_003037854.1 | - | 232146    | 232097    |
| Sma-1-3905 | NS_000200.1    | - | 97136567  | 97136518  |
| Sma-1-3906 | NW_003038230.1 | + | 27567     | 27616     |
| Sma-1-3907 | NS_000200.1    | + | 311313138 | 311313187 |
| Sma-1-3908 | NW_003026465.1 | - | 500046    | 499997    |

|            |                |   |           |           |
|------------|----------------|---|-----------|-----------|
| Sma-1-3909 | NS_000200.1    | - | 207892640 | 207892591 |
| Sma-1-3910 | NW_003038019.1 | - | 276325    | 276276    |
| Sma-1-3911 | NS_000200.1    | - | 233593143 | 233593094 |
| Sma-1-3912 | NW_003038019.1 | + | 350694    | 350743    |
| Sma-1-3913 | NS_000200.1    | + | 233667512 | 233667561 |
| Sma-1-3914 | NW_003037972.1 | - | 181465    | 181416    |
| Sma-1-3915 | NS_000200.1    | - | 202657169 | 202657120 |
| Sma-1-3916 | NW_003038068.1 | + | 48796     | 48845     |
| Sma-1-3917 | NS_000200.1    | + | 263116004 | 263116053 |
| Sma-1-3918 | NW_003037908.1 | - | 980531    | 980482    |
| Sma-1-3919 | NS_000200.1    | - | 153453662 | 153453613 |
| Sma-1-3920 | NW_003037810.1 | - | 1360322   | 1360273   |
| Sma-1-3921 | NS_000200.1    | - | 37964844  | 37964795  |
| Sma-1-3922 | NW_003038069.1 | - | 348446    | 348397    |
| Sma-1-3923 | NS_000200.1    | - | 264191852 | 264191803 |
| Sma-1-3924 | NW_003037803.1 | + | 63413     | 63462     |
| Sma-1-3925 | NS_000200.1    | + | 23563950  | 23563999  |
| Sma-1-3926 | NW_003037795.1 | + | 1592121   | 1592170   |
| Sma-1-3927 | NS_000200.1    | + | 7983004   | 7983053   |
| Sma-1-3928 | NW_003038020.1 | + | 828261    | 828310    |
| Sma-1-3929 | NS_000200.1    | + | 234795605 | 234795654 |
| Sma-1-3930 | NW_003037855.1 | - | 262736    | 262687    |
| Sma-1-3931 | NS_000200.1    | - | 99127486  | 99127437  |
| Sma-1-3932 | NW_003037812.1 | - | 981912    | 981863    |
| Sma-1-3933 | NS_000200.1    | - | 40464651  | 40464602  |
| Sma-1-3934 | NW_003037793.1 | - | 525269    | 525220    |
| Sma-1-3935 | NS_000200.1    | - | 525269    | 525220    |
| Sma-1-3936 | NW_003037831.1 | - | 1277500   | 1277451   |
| Sma-1-3937 | NS_000200.1    | - | 70726802  | 70726753  |
| Sma-1-3938 | NW_003037909.1 | - | 128463    | 128414    |
| Sma-1-3939 | NS_000200.1    | - | 153670112 | 153670063 |
| Sma-1-3940 | NW_003037797.1 | - | 1623052   | 1623003   |
| Sma-1-3941 | NS_000200.1    | - | 12050912  | 12050863  |
| Sma-1-3942 | NW_003026618.1 | - | 408151    | 408102    |
| Sma-1-3943 | NS_000200.1    | - | 322163153 | 322163104 |
| Sma-1-3944 | NW_003037804.1 | + | 506733    | 506782    |
| Sma-1-3945 | NS_000200.1    | + | 25646753  | 25646802  |
| Sma-1-3946 | NW_003038228.1 | - | 102767    | 102718    |
| Sma-1-3947 | NS_000200.1    | - | 310976047 | 310975998 |
| Sma-1-3948 | NW_003037797.1 | + | 1623269   | 1623318   |
| Sma-1-3949 | NS_000200.1    | + | 12051129  | 12051178  |
| Sma-1-3950 | NW_003038022.1 | + | 105272    | 105321    |
| Sma-1-3951 | NS_000200.1    | + | 235786114 | 235786163 |
| Sma-1-3952 | NW_003038022.1 | - | 133967    | 133918    |
| Sma-1-3953 | NS_000200.1    | - | 235814809 | 235814760 |
| Sma-1-3954 | NW_003037810.1 | + | 1335095   | 1335144   |
| Sma-1-3955 | NS_000200.1    | + | 37939617  | 37939666  |
| Sma-1-3956 | NW_003037970.1 | + | 349493    | 349543    |
| Sma-1-3957 | NS_000200.1    | + | 201405683 | 201405733 |
| Sma-1-3958 | NW_003026619.1 | - | 193808    | 193759    |
| Sma-1-3959 | NS_000200.1    | - | 322384552 | 322384503 |
| Sma-1-3960 | NW_003037970.1 | + | 313929    | 313978    |

|            |                |   |           |           |
|------------|----------------|---|-----------|-----------|
| Sma-1-3961 | NS_000200.1    | + | 201370119 | 201370168 |
| Sma-1-3962 | NW_003038022.1 | - | 186954    | 186905    |
| Sma-1-3963 | NS_000200.1    | - | 235867796 | 235867747 |
| Sma-1-3964 | NW_003037970.1 | + | 310993    | 311042    |
| Sma-1-3965 | NS_000200.1    | + | 201367183 | 201367232 |
| Sma-1-3966 | NW_003037856.1 | - | 648523    | 648474    |
| Sma-1-3967 | NS_000200.1    | - | 100006479 | 100006430 |
| Sma-1-3968 | NW_003026619.1 | - | 96830     | 96781     |
| Sma-1-3969 | NS_000200.1    | - | 322287574 | 322287525 |
| Sma-1-3970 | NW_003039127.1 | + | 2118515   | 2118564   |
| Sma-1-3971 | NS_000200.1    | + | 115196014 | 115196063 |
| Sma-1-3972 | NW_003037813.1 | + | 800088    | 800137    |
| Sma-1-3973 | NS_000200.1    | + | 41786951  | 41787000  |
| Sma-1-3974 | NW_003038020.1 | - | 152304    | 152255    |
| Sma-1-3975 | NS_000200.1    | - | 234119648 | 234119599 |
| Sma-1-3976 | NW_003037825.1 | - | 742758    | 742709    |
| Sma-1-3977 | NS_000200.1    | - | 59872540  | 59872491  |
| Sma-1-3978 | NW_003037812.1 | - | 962489    | 962440    |
| Sma-1-3979 | NS_000200.1    | - | 40445228  | 40445179  |
| Sma-1-3980 | NW_003026642.1 | + | 506       | 555       |
| Sma-1-3981 | NS_000200.1    | + | 325066576 | 325066625 |
| Sma-1-3982 | NW_003026650.1 | + | 1128      | 1177      |
| Sma-1-3983 | NS_000200.1    | + | 325122560 | 325122609 |
| Sma-1-3984 | NW_003026653.1 | - | 2227      | 2178      |
| Sma-1-3985 | NW_003037901.1 | - | 296649    | 296600    |
| Sma-1-3986 | NS_000200.1    | - | 325140676 | 325140627 |
| Sma-1-3987 | NS_000200.1    | - | 146145110 | 146145061 |
| Sma-1-3988 | NW_003026714.1 | + | 1280      | 1329      |
| Sma-1-3989 | NS_000200.1    | + | 325375075 | 325375124 |
| Sma-1-3990 | NW_003036900.1 | - | 462       | 413       |
| Sma-1-3991 | NW_003038067.1 | - | 134619    | 134570    |
| Sma-1-3992 | NS_000200.1    | - | 347935711 | 347935662 |
| Sma-1-3993 | NS_000200.1    | - | 262988672 | 262988623 |
| Sma-1-3994 | NW_003037890.1 | + | 1813721   | 1813770   |
| Sma-1-3995 | NS_000200.1    | + | 137497082 | 137497131 |
| Sma-1-3996 | NW_003037805.1 | + | 1566299   | 1566348   |
| Sma-1-3997 | NS_000200.1    | + | 28124143  | 28124192  |
| Sma-1-3998 | NW_003037858.1 | + | 1113051   | 1113100   |
| Sma-1-3999 | NS_000200.1    | + | 101777327 | 101777376 |
| Sma-1-4000 | NW_003038081.1 | + | 330513    | 330562    |
| Sma-1-4001 | NS_000200.1    | + | 269492556 | 269492605 |
| Sma-1-4002 | NW_003037793.1 | + | 2886026   | 2886075   |
| Sma-1-4003 | NS_000200.1    | + | 2886026   | 2886075   |
| Sma-1-4004 | NW_003038037.1 | + | 76344     | 76393     |
| Sma-1-4005 | NS_000200.1    | + | 250231753 | 250231802 |
| Sma-1-4006 | NW_003038039.1 | - | 40121     | 40072     |
| Sma-1-4007 | NS_000200.1    | - | 253477967 | 253477918 |
| Sma-1-4008 | NW_003037825.1 | - | 552559    | 552510    |
| Sma-1-4009 | NS_000200.1    | - | 59682341  | 59682292  |
| Sma-1-4010 | NW_003037858.1 | - | 1125345   | 1125296   |
| Sma-1-4011 | NS_000200.1    | - | 101789621 | 101789572 |
| Sma-1-4012 | NW_003037970.1 | - | 143195    | 143146    |

|            |                |   |           |           |
|------------|----------------|---|-----------|-----------|
| Sma-1-4013 | NS_000200.1    | - | 201199385 | 201199336 |
| Sma-1-4014 | NW_003037797.1 | + | 2130467   | 2130516   |
| Sma-1-4015 | NS_000200.1    | + | 12558327  | 12558376  |
| Sma-1-4016 | NW_003027532.1 | + | 747       | 796       |
| Sma-1-4017 | NS_000200.1    | + | 361560584 | 361560633 |
| Sma-1-4018 | NW_003037891.1 | + | 323534    | 323583    |
| Sma-1-4019 | NS_000200.1    | + | 138204812 | 138204861 |
| Sma-1-4020 | NW_003037856.1 | + | 437836    | 437885    |
| Sma-1-4021 | NS_000200.1    | + | 99795792  | 99795841  |
| Sma-1-4022 | NW_003037969.1 | + | 429080    | 429129    |
| Sma-1-4023 | NS_000200.1    | + | 201035207 | 201035256 |
| Sma-1-4024 | NW_003037825.1 | + | 427990    | 428039    |
| Sma-1-4025 | NS_000200.1    | + | 59557772  | 59557821  |
| Sma-1-4026 | NW_003027591.1 | + | 1221      | 1270      |
| Sma-1-4027 | NS_000200.1    | + | 361689404 | 361689453 |
| Sma-1-4028 | NW_003038025.1 | - | 194051    | 194002    |
| Sma-1-4029 | NS_000200.1    | - | 239052296 | 239052247 |
| Sma-1-4030 | NW_003021738.1 | - | 849       | 800       |
| Sma-1-4031 | NW_003026464.1 | - | 634433    | 634384    |
| Sma-1-4032 | NS_000200.1    | - | 351774973 | 351774924 |
| Sma-1-4033 | NS_000200.1    | - | 203934742 | 203934693 |
| Sma-1-4034 | NW_003027748.1 | + | 898       | 947       |
| Sma-1-4035 | NS_000200.1    | + | 365874344 | 365874393 |
| Sma-1-4036 | NW_003027772.1 | - | 218       | 169       |
| Sma-1-4037 | NW_003037970.1 | - | 179121    | 179072    |
| Sma-1-4038 | NS_000200.1    | - | 365910468 | 365910419 |
| Sma-1-4039 | NS_000200.1    | - | 201235311 | 201235262 |
| Sma-1-4040 | NW_003038232.1 | - | 137069    | 137020    |
| Sma-1-4041 | NS_000200.1    | - | 312100860 | 312100811 |
| Sma-1-4042 | NW_003037863.1 | + | 1069940   | 1069989   |
| Sma-1-4043 | NW_003037899.1 | - | 387736    | 387687    |
| Sma-1-4044 | NS_000200.1    | + | 107828307 | 107828356 |
| Sma-1-4045 | NS_000200.1    | - | 144906847 | 144906798 |
| Sma-1-4046 | NW_003037981.1 | - | 874769    | 874720    |
| Sma-1-4047 | NW_003038030.1 | + | 983020    | 983069    |
| Sma-1-4048 | NS_000200.1    | + | 244118887 | 244118936 |
| Sma-1-4049 | NS_000200.1    | - | 213272637 | 213272588 |
| Sma-1-4050 | NW_003027904.1 | - | 975       | 926       |
| Sma-1-4051 | NS_000200.1    | - | 366128962 | 366128913 |
| Sma-1-4052 | NW_003029016.1 | + | 1615      | 1664      |
| Sma-1-4053 | NS_000200.1    | + | 375169912 | 375169961 |
| Sma-1-4054 | NW_003037795.1 | - | 211733    | 211684    |
| Sma-1-4055 | NS_000200.1    | - | 6602616   | 6602567   |
| Sma-1-4056 | NW_003037838.1 | + | 718880    | 718929    |
| Sma-1-4057 | NS_000200.1    | + | 78717443  | 78717492  |
| Sma-1-4058 | NW_003037969.1 | + | 189595    | 189644    |
| Sma-1-4059 | NS_000200.1    | + | 200795722 | 200795771 |
| Sma-1-4060 | NW_003038080.1 | + | 408960    | 409009    |
| Sma-1-4061 | NS_000200.1    | + | 268861570 | 268861619 |
| Sma-1-4062 | NW_003037943.1 | - | 502501    | 502452    |
| Sma-1-4063 | NS_000200.1    | - | 187524034 | 187523985 |
| Sma-1-4064 | NW_003038260.1 | + | 292145    | 292194    |

|            |                |   |           |           |
|------------|----------------|---|-----------|-----------|
| Sma-1-4065 | NS_000200.1    | + | 323463920 | 323463969 |
| Sma-1-4066 | NW_003038023.1 | + | 372278    | 372327    |
| Sma-1-4067 | NS_000200.1    | + | 237532569 | 237532618 |
| Sma-1-4068 | NW_003028065.1 | - | 77        | 28        |
| Sma-1-4069 | NS_000200.1    | - | 369275520 | 369275471 |
| Sma-1-4070 | NW_003038140.1 | + | 312662    | 312711    |
| Sma-1-4071 | NS_000200.1    | + | 286840539 | 286840588 |
| Sma-1-4072 | NW_003028216.1 | + | 7148      | 7197      |
| Sma-1-4073 | NW_003037941.1 | + | 271231    | 271280    |
| Sma-1-4074 | NS_000200.1    | + | 185005705 | 185005754 |
| Sma-1-4075 | NS_000200.1    | + | 374310412 | 374310461 |
| Sma-1-4076 | NW_003038071.1 | - | 34816     | 34767     |
| Sma-1-4077 | NS_000200.1    | - | 264837859 | 264837810 |
| Sma-1-4078 | NW_003037859.1 | + | 147151    | 147200    |
| Sma-1-4079 | NS_000200.1    | + | 102825992 | 102826041 |
| Sma-1-4080 | NW_003037797.1 | - | 2081493   | 2081444   |
| Sma-1-4081 | NS_000200.1    | - | 12509353  | 12509304  |
| Sma-1-4082 | NW_003039127.1 | + | 2221975   | 2222024   |
| Sma-1-4083 | NS_000200.1    | + | 115299474 | 115299523 |
| Sma-1-4084 | NW_003038237.1 | - | 4820      | 4771      |
| Sma-1-4085 | NS_000200.1    | - | 313444739 | 313444690 |
| Sma-1-4086 | NW_003037825.1 | - | 1272497   | 1272448   |
| Sma-1-4087 | NS_000200.1    | - | 60402279  | 60402230  |
| Sma-1-4088 | NW_003037825.1 | - | 1215020   | 1214971   |
| Sma-1-4089 | NS_000200.1    | - | 60344802  | 60344753  |
| Sma-1-4090 | NW_003037967.1 | - | 233369    | 233320    |
| Sma-1-4091 | NS_000200.1    | - | 199473340 | 199473291 |
| Sma-1-4092 | NW_003038239.1 | - | 12142     | 12093     |
| Sma-1-4093 | NS_000200.1    | - | 313852924 | 313852875 |
| Sma-1-4094 | NW_003037793.1 | - | 130173    | 130124    |
| Sma-1-4095 | NS_000200.1    | - | 130173    | 130124    |
| Sma-1-4096 | NW_003038010.1 | - | 162649    | 162600    |
| Sma-1-4097 | NS_000200.1    | - | 226980872 | 226980823 |
| Sma-1-4098 | NW_003037967.1 | - | 206057    | 206008    |
| Sma-1-4099 | NS_000200.1    | - | 199446028 | 199445979 |
| Sma-1-4100 | NW_003037793.1 | - | 724516    | 724467    |
| Sma-1-4101 | NS_000200.1    | - | 724516    | 724467    |
| Sma-1-4102 | NW_003038023.1 | - | 94103     | 94054     |
| Sma-1-4103 | NS_000200.1    | - | 237254394 | 237254345 |
| Sma-1-4104 | NW_003035869.1 | + | 128441    | 128490    |
| Sma-1-4105 | NS_000200.1    | + | 335312641 | 335312690 |
| Sma-1-4106 | NW_003038024.1 | - | 39544     | 39495     |
| Sma-1-4107 | NS_000200.1    | - | 237936573 | 237936524 |
| Sma-1-4108 | NW_003028876.1 | - | 610       | 561       |
| Sma-1-4109 | NS_000200.1    | - | 370133472 | 370133423 |
| Sma-1-4110 | NW_003028888.1 | - | 99        | 50        |
| Sma-1-4111 | NS_000200.1    | - | 370162913 | 370162864 |
| Sma-1-4112 | NW_003037915.1 | + | 1094220   | 1094269   |
| Sma-1-4113 | NS_000200.1    | + | 162994206 | 162994255 |
| Sma-1-4114 | NW_003037909.1 | - | 369994    | 369945    |
| Sma-1-4115 | NS_000200.1    | - | 153911643 | 153911594 |
| Sma-1-4116 | NW_003037881.1 | - | 453586    | 453537    |

|            |                |   |           |           |
|------------|----------------|---|-----------|-----------|
| Sma-1-4117 | NS.000200.1    | - | 124885377 | 124885328 |
| Sma-1-4118 | NW_003038162.1 | - | 246099    | 246050    |
| Sma-1-4119 | NS.000200.1    | - | 298191554 | 298191505 |
| Sma-1-4120 | NW_003039097.1 | - | 1462      | 1413      |
| Sma-1-4121 | NS.000200.1    | - | 360501759 | 360501710 |
| Sma-1-4122 | NW_003037965.1 | - | 311446    | 311397    |
| Sma-1-4123 | NS.000200.1    | - | 198600531 | 198600482 |
| Sma-1-4124 | NW_003037859.1 | - | 615359    | 615310    |
| Sma-1-4125 | NS.000200.1    | - | 103294200 | 103294151 |
| Sma-1-4126 | NW_003037824.1 | - | 959010    | 958961    |
| Sma-1-4127 | NS.000200.1    | - | 57889950  | 57889901  |
| Sma-1-4128 | NW_003037888.1 | - | 1401379   | 1401330   |
| Sma-1-4129 | NS.000200.1    | - | 133609871 | 133609822 |
| Sma-1-4130 | NW_003038012.1 | - | 48081     | 48032     |
| Sma-1-4131 | NS.000200.1    | - | 228372020 | 228371971 |
| Sma-1-4132 | NW_003038124.1 | + | 46578     | 46627     |
| Sma-1-4133 | NS.000200.1    | + | 279039222 | 279039271 |
| Sma-1-4134 | NW_003037859.1 | - | 757963    | 757914    |
| Sma-1-4135 | NS.000200.1    | - | 103436804 | 103436755 |
| Sma-1-4136 | NW_003037964.1 | + | 78168     | 78217     |
| Sma-1-4137 | NS.000200.1    | + | 197679690 | 197679739 |
| Sma-1-4138 | NW_003038025.1 | + | 102415    | 102464    |
| Sma-1-4139 | NS.000200.1    | + | 238960660 | 238960709 |
| Sma-1-4140 | NW_003037824.1 | - | 946059    | 946010    |
| Sma-1-4141 | NS.000200.1    | - | 57876999  | 57876950  |
| Sma-1-4142 | NW_003029320.1 | - | 1849      | 1800      |
| Sma-1-4143 | NS.000200.1    | - | 357283963 | 357283914 |
| Sma-1-4144 | NW_003038073.1 | + | 288372    | 288421    |
| Sma-1-4145 | NS.000200.1    | + | 265810805 | 265810854 |
| Sma-1-4146 | NW_003037859.1 | - | 805579    | 805530    |
| Sma-1-4147 | NS.000200.1    | - | 103484420 | 103484371 |
| Sma-1-4148 | NW_003037881.1 | + | 490349    | 490398    |
| Sma-1-4149 | NS.000200.1    | + | 124922140 | 124922189 |
| Sma-1-4150 | NW_003038080.1 | - | 206423    | 206374    |
| Sma-1-4151 | NS.000200.1    | - | 268659033 | 268658984 |
| Sma-1-4152 | NW_003037822.1 | - | 26391     | 26342     |
| Sma-1-4153 | NS.000200.1    | - | 54334397  | 54334348  |
| Sma-1-4154 | NW_003037887.1 | - | 1245831   | 1245782   |
| Sma-1-4155 | NS.000200.1    | - | 131709809 | 131709760 |
| Sma-1-4156 | NW_003038034.1 | + | 523676    | 523725    |
| Sma-1-4157 | NS.000200.1    | + | 247465432 | 247465481 |
| Sma-1-4158 | NW_003037870.1 | - | 517111    | 517062    |
| Sma-1-4159 | NS.000200.1    | - | 117390776 | 117390727 |
| Sma-1-4160 | NW_003038025.1 | + | 539326    | 539375    |
| Sma-1-4161 | NS.000200.1    | + | 239397571 | 239397620 |
| Sma-1-4162 | NW_003038242.1 | + | 53021     | 53070     |
| Sma-1-4163 | NS.000200.1    | + | 314752167 | 314752216 |
| Sma-1-4164 | NW_003037795.1 | - | 320882    | 320833    |
| Sma-1-4165 | NS.000200.1    | - | 6711765   | 6711716   |
| Sma-1-4166 | NW_003037795.1 | + | 344661    | 344710    |
| Sma-1-4167 | NS.000200.1    | + | 6735544   | 6735593   |
| Sma-1-4168 | NW_003037793.1 | - | 3075847   | 3075798   |

|            |                |   |           |           |
|------------|----------------|---|-----------|-----------|
| Sma-1-4169 | NS.000200.1    | - | 3075847   | 3075798   |
| Sma-1-4170 | NW_003038145.1 | - | 360563    | 360514    |
| Sma-1-4171 | NS.000200.1    | - | 288971986 | 288971937 |
| Sma-1-4172 | NW_003037805.1 | - | 2936      | 2887      |
| Sma-1-4173 | NS.000200.1    | - | 26560780  | 26560731  |
| Sma-1-4174 | NW_003037824.1 | - | 764739    | 764690    |
| Sma-1-4175 | NS.000200.1    | - | 57695679  | 57695630  |
| Sma-1-4176 | NW_003037964.1 | + | 26363     | 26412     |
| Sma-1-4177 | NS.000200.1    | + | 197627885 | 197627934 |
| Sma-1-4178 | NW_003036817.1 | - | 1006      | 957       |
| Sma-1-4179 | NS.000200.1    | - | 347708605 | 347708556 |
| Sma-1-4180 | NW_003038074.1 | + | 115440    | 115489    |
| Sma-1-4181 | NS.000200.1    | + | 266006820 | 266006869 |
| Sma-1-4182 | NW_003037824.1 | + | 642006    | 642055    |
| Sma-1-4183 | NS.000200.1    | + | 57572946  | 57572995  |
| Sma-1-4184 | NW_003037963.1 | + | 46379     | 46428     |
| Sma-1-4185 | NS.000200.1    | + | 197324591 | 197324640 |
| Sma-1-4186 | NW_003038145.1 | + | 94986     | 95035     |
| Sma-1-4187 | NS.000200.1    | + | 288706409 | 288706458 |
| Sma-1-4188 | NW_003037962.1 | + | 177725    | 177774    |
| Sma-1-4189 | NS.000200.1    | + | 196254568 | 196254617 |
| Sma-1-4190 | NW_003035193.1 | - | 1225      | 1176      |
| Sma-1-4191 | NS.000200.1    | - | 370780208 | 370780159 |
| Sma-1-4192 | NW_003038248.1 | - | 16668     | 16619     |
| Sma-1-4193 | NS.000200.1    | - | 316327935 | 316327886 |
| Sma-1-4194 | NW_003038077.1 | - | 158106    | 158057    |
| Sma-1-4195 | NS.000200.1    | - | 266929746 | 266929697 |
| Sma-1-4196 | NW_003037824.1 | + | 416305    | 416354    |
| Sma-1-4197 | NS.000200.1    | + | 57347245  | 57347294  |
| Sma-1-4198 | NW_003038255.1 | - | 274174    | 274125    |
| Sma-1-4199 | NS.000200.1    | - | 320663319 | 320663270 |
| Sma-1-4200 | NW_003037935.1 | - | 615382    | 615333    |
| Sma-1-4201 | NS.000200.1    | - | 180031917 | 180031868 |
| Sma-1-4202 | NW_003037938.1 | + | 652666    | 652715    |
| Sma-1-4203 | NS.000200.1    | + | 182689779 | 182689828 |
| Sma-1-4204 | NW_003037824.1 | - | 409258    | 409209    |
| Sma-1-4205 | NS.000200.1    | - | 57340198  | 57340149  |
| Sma-1-4206 | NW_003038077.1 | - | 191338    | 191289    |
| Sma-1-4207 | NS.000200.1    | - | 266962978 | 266962929 |
| Sma-1-4208 | NW_003037824.1 | - | 352531    | 352482    |
| Sma-1-4209 | NS.000200.1    | - | 57283471  | 57283422  |
| Sma-1-4210 | NW_003030353.1 | - | 1608      | 1559      |
| Sma-1-4211 | NW_003026608.1 | - | 115158    | 115109    |
| Sma-1-4212 | NS.000200.1    | - | 362749052 | 362749003 |
| Sma-1-4213 | NS.000200.1    | - | 309393278 | 309393229 |
| Sma-1-4214 | NW_003038027.1 | + | 39279     | 39328     |
| Sma-1-4215 | NS.000200.1    | + | 240409993 | 240410042 |
| Sma-1-4216 | NW_003037797.1 | + | 2766852   | 2766901   |
| Sma-1-4217 | NS.000200.1    | + | 13194712  | 13194761  |
| Sma-1-4218 | NW_003037909.1 | + | 614822    | 614871    |
| Sma-1-4219 | NS.000200.1    | + | 154156471 | 154156520 |
| Sma-1-4220 | NW_003037909.1 | + | 692146    | 692195    |

|            |                |   |           |           |
|------------|----------------|---|-----------|-----------|
| Sma-1-4221 | NS_000200.1    | + | 154233795 | 154233844 |
| Sma-1-4222 | NW_003037962.1 | + | 456989    | 457038    |
| Sma-1-4223 | NS_000200.1    | + | 196533832 | 196533881 |
| Sma-1-4224 | NW_003037795.1 | + | 515547    | 515596    |
| Sma-1-4225 | NS_000200.1    | + | 6906430   | 6906479   |
| Sma-1-4226 | NW_003038028.1 | + | 145818    | 145867    |
| Sma-1-4227 | NS_000200.1    | + | 241453392 | 241453441 |
| Sma-1-4228 | NW_003037915.1 | - | 770452    | 770403    |
| Sma-1-4229 | NS_000200.1    | - | 162670438 | 162670389 |
| Sma-1-4230 | NW_003037932.1 | - | 646517    | 646468    |
| Sma-1-4231 | NS_000200.1    | - | 178179713 | 178179664 |
| Sma-1-4232 | NW_003038249.1 | + | 69766     | 69815     |
| Sma-1-4233 | NS_000200.1    | + | 316752019 | 316752068 |
| Sma-1-4234 | NW_003038145.1 | + | 97230     | 97279     |
| Sma-1-4235 | NS_000200.1    | + | 288708653 | 288708702 |
| Sma-1-4236 | NW_003037804.1 | - | 1333976   | 1333927   |
| Sma-1-4237 | NS_000200.1    | - | 26473996  | 26473947  |
| Sma-1-4238 | NW_003037861.1 | + | 322320    | 322369    |
| Sma-1-4239 | NS_000200.1    | + | 105098774 | 105098823 |
| Sma-1-4240 | NW_003037823.1 | + | 64296     | 64345     |
| Sma-1-4241 | NS_000200.1    | + | 55980915  | 55980964  |
| Sma-1-4242 | NW_003037795.1 | + | 583158    | 583207    |
| Sma-1-4243 | NS_000200.1    | + | 6974041   | 6974090   |
| Sma-1-4244 | NW_003037918.1 | + | 127703    | 127752    |
| Sma-1-4245 | NS_000200.1    | + | 166694693 | 166694742 |
| Sma-1-4246 | NW_003037932.1 | + | 349205    | 349254    |
| Sma-1-4247 | NW_003037932.1 | + | 350342    | 350391    |
| Sma-1-4248 | NS_000200.1    | + | 177882401 | 177882450 |
| Sma-1-4249 | NS_000200.1    | + | 177883538 | 177883587 |
| Sma-1-4250 | NW_003037887.1 | - | 630257    | 630208    |
| Sma-1-4251 | NS_000200.1    | - | 131094235 | 131094186 |
| Sma-1-4252 | NW_003037861.1 | + | 645142    | 645191    |
| Sma-1-4253 | NS_000200.1    | + | 105421596 | 105421645 |
| Sma-1-4254 | NW_003037918.1 | + | 1351831   | 1351880   |
| Sma-1-4255 | NS_000200.1    | + | 167918821 | 167918870 |
| Sma-1-4256 | NW_003037937.1 | - | 555048    | 554999    |
| Sma-1-4257 | NS_000200.1    | - | 181754957 | 181754908 |
| Sma-1-4258 | NW_003037823.1 | + | 123679    | 123728    |
| Sma-1-4259 | NS_000200.1    | + | 56040298  | 56040347  |
| Sma-1-4260 | NW_003038079.1 | - | 19909     | 19860     |
| Sma-1-4261 | NS_000200.1    | - | 268149897 | 268149848 |
| Sma-1-4262 | NW_003038028.1 | - | 595       | 546       |
| Sma-1-4263 | NS_000200.1    | - | 241308169 | 241308120 |
| Sma-1-4264 | NW_003037862.1 | + | 273120    | 273169    |
| Sma-1-4265 | NS_000200.1    | + | 105924781 | 105924830 |
| Sma-1-4266 | NW_003038028.1 | - | 714227    | 714178    |
| Sma-1-4267 | NS_000200.1    | - | 242021801 | 242021752 |
| Sma-1-4268 | NW_003038250.1 | + | 136849    | 136898    |
| Sma-1-4269 | NS_000200.1    | + | 318189526 | 318189575 |
| Sma-1-4270 | NW_003037797.1 | + | 2972556   | 2972605   |
| Sma-1-4271 | NS_000200.1    | + | 13400416  | 13400465  |
| Sma-1-4272 | NW_003037915.1 | + | 1009929   | 1009978   |



|            |                |   |           |           |
|------------|----------------|---|-----------|-----------|
| Sma-1-4273 | NS_000200.1    | + | 162909915 | 162909964 |
| Sma-1-4274 | NW_003037810.1 | + | 1016162   | 1016211   |
| Sma-1-4275 | NS_000200.1    | + | 37620684  | 37620733  |
| Sma-1-4276 | NW_003037909.1 | - | 886257    | 886206    |
| Sma-1-4277 | NS_000200.1    | - | 154427906 | 154427855 |
| Sma-1-4278 | NW_003037962.1 | + | 115324    | 115373    |
| Sma-1-4279 | NS_000200.1    | + | 196192167 | 196192216 |
| Sma-1-4280 | NW_003037915.1 | - | 931725    | 931676    |
| Sma-1-4281 | NS_000200.1    | - | 162831711 | 162831662 |
| Sma-1-4282 | NW_003037961.1 | - | 450506    | 450457    |
| Sma-1-4283 | NS_000200.1    | - | 196074748 | 196074699 |
| Sma-1-4284 | NW_003038251.1 | + | 147685    | 147734    |
| Sma-1-4285 | NS_000200.1    | + | 318479457 | 318479506 |
| Sma-1-4286 | NW_003038251.1 | + | 258313    | 258362    |
| Sma-1-4287 | NS_000200.1    | + | 318590085 | 318590134 |
| Sma-1-4288 | NW_003037863.1 | + | 1199496   | 1199545   |
| Sma-1-4289 | NS_000200.1    | + | 107957863 | 107957912 |
| Sma-1-4290 | NW_003038080.1 | - | 136324    | 136275    |
| Sma-1-4291 | NS_000200.1    | - | 268588934 | 268588885 |
| Sma-1-4292 | NW_003037940.1 | - | 112461    | 112412    |
| Sma-1-4293 | NS_000200.1    | - | 183854591 | 183854542 |
| Sma-1-4294 | NW_003038249.1 | + | 211504    | 211553    |
| Sma-1-4295 | NS_000200.1    | + | 316893757 | 316893806 |
| Sma-1-4296 | NW_003032082.1 | - | 6260      | 6210      |
| Sma-1-4297 | NS_000200.1    | - | 377497873 | 377497823 |
| Sma-1-4298 | NW_003038261.1 | - | 554317    | 554268    |
| Sma-1-4299 | NS_000200.1    | - | 324167968 | 324167919 |
| Sma-1-4300 | NW_003035858.1 | - | 1811      | 1762      |
| Sma-1-4301 | NS_000200.1    | - | 364241715 | 364241666 |
| Sma-1-4302 | NW_003037961.1 | - | 260415    | 260366    |
| Sma-1-4303 | NS_000200.1    | - | 195884657 | 195884608 |
| Sma-1-4304 | NW_003037794.1 | - | 1682152   | 1682103   |
| Sma-1-4305 | NS_000200.1    | - | 5861747   | 5861698   |
| Sma-1-4306 | NW_003037809.1 | + | 612708    | 612757    |
| Sma-1-4307 | NS_000200.1    | + | 34277172  | 34277221  |
| Sma-1-4308 | NW_003038033.1 | - | 410885    | 410836    |
| Sma-1-4309 | NS_000200.1    | - | 246390887 | 246390838 |
| Sma-1-4310 | NW_003037814.1 | - | 112584    | 112535    |
| Sma-1-4311 | NS_000200.1    | - | 43096444  | 43096395  |
| Sma-1-4312 | NW_003032160.1 | - | 160474    | 160425    |
| Sma-1-4313 | NS_000200.1    | - | 381168560 | 381168511 |
| Sma-1-4314 | NW_003032160.1 | - | 195201    | 195152    |
| Sma-1-4315 | NS_000200.1    | - | 381203287 | 381203238 |
| Sma-1-4316 | NW_003037916.1 | - | 1024275   | 1024226   |
| Sma-1-4317 | NS_000200.1    | - | 164217686 | 164217637 |
| Sma-1-4318 | NW_003037863.1 | - | 730206    | 730157    |
| Sma-1-4319 | NS_000200.1    | - | 107488573 | 107488524 |
| Sma-1-4320 | NW_003037809.1 | - | 622007    | 621958    |
| Sma-1-4321 | NW_003037964.1 | + | 182812    | 182861    |
| Sma-1-4322 | NS_000200.1    | + | 197784334 | 197784383 |
| Sma-1-4323 | NS_000200.1    | - | 34286471  | 34286422  |
| Sma-1-4324 | NW_003038083.1 | - | 226704    | 226655    |

|            |                |   |           |           |
|------------|----------------|---|-----------|-----------|
| Sma-1-4325 | NS_000200.1    | - | 270470041 | 270469992 |
| Sma-1-4326 | NW_003037797.1 | + | 3204257   | 3204306   |
| Sma-1-4327 | NS_000200.1    | + | 13632117  | 13632166  |
| Sma-1-4328 | NW_003037886.1 | + | 857238    | 857287    |
| Sma-1-4329 | NS_000200.1    | + | 130112805 | 130112854 |
| Sma-1-4330 | NW_003037822.1 | - | 36145     | 36096     |
| Sma-1-4331 | NS_000200.1    | - | 54344151  | 54344102  |
| Sma-1-4332 | NW_003037956.1 | - | 33678     | 33629     |
| Sma-1-4333 | NS_000200.1    | - | 194090133 | 194090084 |
| Sma-1-4334 | NW_003037886.1 | + | 774583    | 774632    |
| Sma-1-4335 | NS_000200.1    | + | 130030150 | 130030199 |
| Sma-1-4336 | NW_003037822.1 | + | 323127    | 323176    |
| Sma-1-4337 | NS_000200.1    | + | 54631133  | 54631182  |
| Sma-1-4338 | NW_003037819.1 | + | 1062757   | 1062806   |
| Sma-1-4339 | NS_000200.1    | + | 52151022  | 52151071  |
| Sma-1-4340 | NW_003037793.1 | + | 3204295   | 3204344   |
| Sma-1-4341 | NS_000200.1    | + | 3204295   | 3204344   |
| Sma-1-4342 | NW_003037864.1 | - | 1465255   | 1465206   |
| Sma-1-4343 | NS_000200.1    | - | 109957829 | 109957780 |
| Sma-1-4344 | NW_003037917.1 | - | 1458580   | 1458531   |
| Sma-1-4345 | NS_000200.1    | - | 166495384 | 166495335 |
| Sma-1-4346 | NW_003038253.1 | + | 187046    | 187095    |
| Sma-1-4347 | NW_003038029.1 | + | 813117    | 813166    |
| Sma-1-4348 | NS_000200.1    | + | 243014018 | 243014067 |
| Sma-1-4349 | NS_000200.1    | + | 319504843 | 319504892 |
| Sma-1-4350 | NW_003038083.1 | + | 11786     | 11835     |
| Sma-1-4351 | NS_000200.1    | + | 270255123 | 270255172 |
| Sma-1-4352 | NW_003038037.1 | - | 1731231   | 1731182   |
| Sma-1-4353 | NS_000200.1    | - | 251886640 | 251886591 |
| Sma-1-4354 | NW_003038032.1 | - | 122187    | 122138    |
| Sma-1-4355 | NS_000200.1    | - | 245281347 | 245281298 |
| Sma-1-4356 | NW_003038032.1 | - | 202866    | 202817    |
| Sma-1-4357 | NS_000200.1    | - | 245362026 | 245361977 |
| Sma-1-4358 | NW_003037955.1 | - | 176006    | 175957    |
| Sma-1-4359 | NS_000200.1    | - | 193802740 | 193802691 |
| Sma-1-4360 | NW_003038373.1 | + | 3606      | 3655      |
| Sma-1-4361 | NS_000200.1    | + | 327324477 | 327324526 |
| Sma-1-4362 | NW_003038053.1 | + | 436671    | 436720    |
| Sma-1-4363 | NS_000200.1    | + | 257796766 | 257796815 |
| Sma-1-4364 | NW_003038032.1 | + | 257222    | 257271    |
| Sma-1-4365 | NS_000200.1    | + | 245416382 | 245416431 |
| Sma-1-4366 | NW_003037864.1 | - | 23303     | 23254     |
| Sma-1-4367 | NS_000200.1    | - | 108515877 | 108515828 |
| Sma-1-4368 | NW_003037955.1 | + | 166482    | 166531    |
| Sma-1-4369 | NS_000200.1    | + | 193793216 | 193793265 |
| Sma-1-4370 | NW_003037822.1 | + | 1504367   | 1504416   |
| Sma-1-4371 | NS_000200.1    | + | 55812373  | 55812422  |
| Sma-1-4372 | NW_003037954.1 | - | 35154     | 35105     |
| Sma-1-4373 | NS_000200.1    | - | 193264776 | 193264727 |
| Sma-1-4374 | NW_003037864.1 | - | 58176     | 58127     |
| Sma-1-4375 | NS_000200.1    | - | 108550750 | 108550701 |
| Sma-1-4376 | NW_003037886.1 | - | 702575    | 702526    |

|            |                |   |           |           |
|------------|----------------|---|-----------|-----------|
| Sma-1-4377 | NS_000200.1    | - | 129958142 | 129958093 |
| Sma-1-4378 | NW_003037953.1 | + | 203679    | 203728    |
| Sma-1-4379 | NS_000200.1    | + | 193116730 | 193116779 |
| Sma-1-4380 | NW_003033762.1 | + | 1483      | 1532      |
| Sma-1-4381 | NW_003038129.1 | - | 41332     | 41283     |
| Sma-1-4382 | NS_000200.1    | + | 358878123 | 358878172 |
| Sma-1-4383 | NS_000200.1    | - | 281294679 | 281294630 |
| Sma-1-4384 | NW_003037865.1 | - | 1039968   | 1039919   |
| Sma-1-4385 | NS_000200.1    | - | 111461887 | 111461838 |
| Sma-1-4386 | NW_003037935.1 | + | 269426    | 269475    |
| Sma-1-4387 | NS_000200.1    | + | 179685961 | 179686010 |
| Sma-1-4388 | NW_003038256.1 | - | 279505    | 279456    |
| Sma-1-4389 | NS_000200.1    | - | 321013331 | 321013282 |
| Sma-1-4390 | NW_003038257.1 | + | 188450    | 188499    |
| Sma-1-4391 | NW_003038257.1 | - | 183427    | 183378    |
| Sma-1-4392 | NS_000200.1    | + | 321362778 | 321362827 |
| Sma-1-4393 | NS_000200.1    | - | 321357755 | 321357706 |
| Sma-1-4394 | NW_003038257.1 | + | 228364    | 228413    |
| Sma-1-4395 | NS_000200.1    | + | 321402692 | 321402741 |
| Sma-1-4396 | NW_003038032.1 | - | 687155    | 687106    |
| Sma-1-4397 | NS_000200.1    | - | 245846315 | 245846266 |
| Sma-1-4398 | NW_003037937.1 | - | 176830    | 176781    |
| Sma-1-4399 | NS_000200.1    | - | 181376739 | 181376690 |
| Sma-1-4400 | NW_003037865.1 | - | 466011    | 465962    |
| Sma-1-4401 | NS_000200.1    | - | 110887930 | 110887881 |
| Sma-1-4402 | NW_003038083.1 | - | 638268    | 638219    |
| Sma-1-4403 | NS_000200.1    | - | 270881605 | 270881556 |
| Sma-1-4404 | NW_003034024.1 | - | 984       | 935       |
| Sma-1-4405 | NS_000200.1    | - | 363496873 | 363496824 |
| Sma-1-4406 | NW_003037865.1 | + | 51009     | 51058     |
| Sma-1-4407 | NS_000200.1    | + | 110472928 | 110472977 |
| Sma-1-4408 | NW_003037796.1 | + | 1072980   | 1073029   |
| Sma-1-4409 | NS_000200.1    | + | 9282624   | 9282673   |
| Sma-1-4410 | NW_003037916.1 | + | 1311791   | 1311840   |
| Sma-1-4411 | NS_000200.1    | + | 164505202 | 164505251 |
| Sma-1-4412 | NW_003037821.1 | - | 862468    | 862419    |
| Sma-1-4413 | NS_000200.1    | - | 54006952  | 54006903  |
| Sma-1-4414 | NW_003037886.1 | + | 1128642   | 1128691   |
| Sma-1-4415 | NS_000200.1    | + | 130384209 | 130384258 |
| Sma-1-4416 | NW_003037821.1 | - | 633329    | 633280    |
| Sma-1-4417 | NS_000200.1    | - | 53777813  | 53777764  |
| Sma-1-4418 | NW_003038033.1 | + | 238645    | 238694    |
| Sma-1-4419 | NS_000200.1    | + | 246218647 | 246218696 |
| Sma-1-4420 | NW_003037809.1 | - | 652669    | 652620    |
| Sma-1-4421 | NS_000200.1    | - | 34317133  | 34317084  |
| Sma-1-4422 | NW_003034553.1 | + | 6037      | 6086      |
| Sma-1-4423 | NS_000200.1    | + | 327186344 | 327186393 |
| Sma-1-4424 | NW_003037814.1 | - | 320796    | 320747    |
| Sma-1-4425 | NS_000200.1    | - | 43304656  | 43304607  |
| Sma-1-4426 | NW_003037809.1 | + | 2939887   | 2939936   |
| Sma-1-4427 | NS_000200.1    | + | 36604351  | 36604400  |
| Sma-1-4428 | NW_003037911.1 | + | 209351    | 209400    |

|            |                |   |           |           |
|------------|----------------|---|-----------|-----------|
| Sma-1-4429 | NW_003037911.1 | - | 209560    | 209511    |
| Sma-1-4430 | NS_000200.1    | + | 155996704 | 155996753 |
| Sma-1-4431 | NS_000200.1    | - | 155996913 | 155996864 |
| Sma-1-4432 | NW_003034567.1 | + | 897       | 946       |
| Sma-1-4433 | NS_000200.1    | + | 327641791 | 327641840 |
| Sma-1-4434 | NW_003038033.1 | + | 322001    | 322050    |
| Sma-1-4435 | NS_000200.1    | + | 246302003 | 246302052 |
| Sma-1-4436 | NW_003038152.1 | - | 222520    | 222471    |
| Sma-1-4437 | NS_000200.1    | - | 292828244 | 292828195 |
| Sma-1-4438 | NW_003034742.1 | + | 175       | 224       |
| Sma-1-4439 | NW_003037953.1 | - | 233720    | 233671    |
| Sma-1-4440 | NS_000200.1    | + | 346907083 | 346907132 |
| Sma-1-4441 | NS_000200.1    | - | 193146771 | 193146722 |
| Sma-1-4442 | NW_003038517.1 | - | 245757    | 245708    |
| Sma-1-4443 | NS_000200.1    | - | 341010245 | 341010196 |
| Sma-1-4444 | NW_003038258.1 | - | 24741     | 24692     |
| Sma-1-4445 | NS_000200.1    | - | 322563251 | 322563202 |
| Sma-1-4446 | NW_003037886.1 | + | 1125907   | 1125956   |
| Sma-1-4447 | NS_000200.1    | + | 130381474 | 130381523 |
| Sma-1-4448 | NW_003038033.1 | + | 535067    | 535116    |
| Sma-1-4449 | NS_000200.1    | + | 246515069 | 246515118 |
| Sma-1-4450 | NW_003038258.1 | - | 98265     | 98216     |
| Sma-1-4451 | NS_000200.1    | - | 322636775 | 322636726 |
| Sma-1-4452 | NW_003038259.1 | - | 118168    | 118119    |
| Sma-1-4453 | NS_000200.1    | - | 322978767 | 322978718 |
| Sma-1-4454 | NW_003037946.1 | - | 775586    | 775537    |
| Sma-1-4455 | NS_000200.1    | - | 191469446 | 191469397 |
| Sma-1-4456 | NW_003038259.1 | - | 136331    | 136282    |
| Sma-1-4457 | NS_000200.1    | - | 322996930 | 322996881 |
| Sma-1-4458 | NW_003038259.1 | - | 275091    | 275042    |
| Sma-1-4459 | NS_000200.1    | - | 323135690 | 323135641 |
| Sma-1-4460 | NW_003037946.1 | + | 772888    | 772937    |
| Sma-1-4461 | NS_000200.1    | + | 191466748 | 191466797 |
| Sma-1-4462 | NW_003037866.1 | + | 697836    | 697885    |
| Sma-1-4463 | NS_000200.1    | + | 112185635 | 112185684 |
| Sma-1-4464 | NW_003038033.1 | - | 697841    | 697792    |
| Sma-1-4465 | NS_000200.1    | - | 246677843 | 246677794 |
| Sma-1-4466 | NW_003038033.1 | + | 72048     | 72097     |
| Sma-1-4467 | NS_000200.1    | + | 246052050 | 246052099 |
| Sma-1-4468 | NW_003038033.1 | + | 785981    | 786030    |
| Sma-1-4469 | NS_000200.1    | + | 246765983 | 246766032 |
| Sma-1-4470 | NW_003037911.1 | - | 629050    | 629001    |
| Sma-1-4471 | NS_000200.1    | - | 156416403 | 156416354 |
| Sma-1-4472 | NW_003037946.1 | + | 1027853   | 1027902   |
| Sma-1-4473 | NS_000200.1    | + | 191721713 | 191721762 |
| Sma-1-4474 | NW_003037867.1 | + | 23139     | 23188     |
| Sma-1-4475 | NS_000200.1    | + | 115623958 | 115624007 |
| Sma-1-4476 | NW_003038509.1 | - | 70633     | 70584     |
| Sma-1-4477 | NS_000200.1    | - | 337703085 | 337703036 |
| Sma-1-4478 | NW_003037810.1 | + | 297801    | 297850    |
| Sma-1-4479 | NS_000200.1    | + | 36902323  | 36902372  |
| Sma-1-4480 | NW_003037945.1 | - | 734696    | 734647    |

|            |                |   |           |           |
|------------|----------------|---|-----------|-----------|
| Sma-1-4481 | NS_000200.1    | - | 189836660 | 189836611 |
| Sma-1-4482 | NW_003038033.1 | + | 812829    | 812878    |
| Sma-1-4483 | NS_000200.1    | + | 246792831 | 246792880 |
| Sma-1-4484 | NW_003038152.1 | + | 370616    | 370665    |
| Sma-1-4485 | NS_000200.1    | + | 292976340 | 292976389 |
| Sma-1-4486 | NW_003037809.1 | + | 2684674   | 2684723   |
| Sma-1-4487 | NS_000200.1    | + | 36349138  | 36349187  |
| Sma-1-4488 | NW_003037811.1 | + | 1271230   | 1271279   |
| Sma-1-4489 | NS_000200.1    | + | 39441472  | 39441521  |
| Sma-1-4490 | NW_003037806.1 | - | 28431     | 28382     |
| Sma-1-4491 | NS_000200.1    | - | 28223645  | 28223596  |
| Sma-1-4492 | NW_003037868.1 | + | 15518     | 15567     |
| Sma-1-4493 | NS_000200.1    | + | 115987230 | 115987279 |
| Sma-1-4494 | NW_003037945.1 | + | 1096676   | 1096725   |
| Sma-1-4495 | NS_000200.1    | + | 190198640 | 190198689 |
| Sma-1-4496 | NW_003037797.1 | - | 3773406   | 3773357   |
| Sma-1-4497 | NS_000200.1    | - | 14201266  | 14201217  |
| Sma-1-4498 | NW_003038033.1 | - | 890477    | 890428    |
| Sma-1-4499 | NS_000200.1    | - | 246870479 | 246870430 |
| Sma-1-4500 | NW_003038153.1 | - | 137714    | 137665    |
| Sma-1-4501 | NS_000200.1    | - | 293199763 | 293199714 |
| Sma-1-4502 | NW_003037796.1 | + | 1681983   | 1682032   |
| Sma-1-4503 | NS_000200.1    | + | 9891627   | 9891676   |
| Sma-1-4504 | NW_003037820.1 | - | 258196    | 258147    |
| Sma-1-4505 | NS_000200.1    | - | 52531178  | 52531129  |
| Sma-1-4506 | NW_003037868.1 | - | 86717     | 86668     |
| Sma-1-4507 | NS_000200.1    | - | 116058429 | 116058380 |
| Sma-1-4508 | NW_003038084.1 | + | 556542    | 556591    |
| Sma-1-4509 | NS_000200.1    | + | 271571786 | 271571835 |
| Sma-1-4510 | NW_003038261.1 | + | 280304    | 280353    |
| Sma-1-4511 | NS_000200.1    | + | 323893955 | 323894004 |
| Sma-1-4512 | NW_003035759.1 | + | 1871      | 1920      |
| Sma-1-4513 | NS_000200.1    | + | 364017215 | 364017264 |
| Sma-1-4514 | NW_003037870.1 | + | 250340    | 250389    |
| Sma-1-4515 | NS_000200.1    | + | 117124005 | 117124054 |
| Sma-1-4516 | NW_003037819.1 | - | 971501    | 971452    |
| Sma-1-4517 | NS_000200.1    | - | 52059766  | 52059717  |
| Sma-1-4518 | NW_003038034.1 | + | 308230    | 308279    |
| Sma-1-4519 | NS_000200.1    | + | 247249986 | 247250035 |
| Sma-1-4520 | NW_003038085.1 | - | 469709    | 469660    |
| Sma-1-4521 | NS_000200.1    | - | 272159802 | 272159753 |
| Sma-1-4522 | NW_003038252.1 | + | 4177      | 4226      |
| Sma-1-4523 | NS_000200.1    | + | 318859765 | 318859814 |
| Sma-1-4524 | NW_003035852.1 | + | 166       | 215       |
| Sma-1-4525 | NW_003037932.1 | - | 135162    | 135113    |
| Sma-1-4526 | NS_000200.1    | + | 364225226 | 364225275 |
| Sma-1-4527 | NS_000200.1    | - | 177668358 | 177668309 |
| Sma-1-4528 | NW_003037885.1 | - | 634446    | 634397    |
| Sma-1-4529 | NS_000200.1    | - | 128732393 | 128732344 |
| Sma-1-4530 | NW_003037944.1 | + | 583862    | 583911    |
| Sma-1-4531 | NS_000200.1    | + | 188805215 | 188805264 |
| Sma-1-4532 | NW_003037819.1 | - | 150513    | 150464    |

|            |                |   |           |           |
|------------|----------------|---|-----------|-----------|
| Sma-1-4533 | NS_000200.1    | - | 51238778  | 51238729  |
| Sma-1-4534 | NW_003037871.1 | + | 209520    | 209569    |
| Sma-1-4535 | NS_000200.1    | + | 117657258 | 117657307 |
| Sma-1-4536 | NW_003037819.1 | + | 601877    | 601926    |
| Sma-1-4537 | NS_000200.1    | + | 51690142  | 51690191  |
| Sma-1-4538 | NW_003037793.1 | - | 3303317   | 3303268   |
| Sma-1-4539 | NS_000200.1    | - | 3303317   | 3303268   |
| Sma-1-4540 | NW_003035870.1 | + | 94606     | 94655     |
| Sma-1-4541 | NS_000200.1    | + | 335459895 | 335459944 |
| Sma-1-4542 | NW_003039130.1 | - | 130335    | 130286    |
| Sma-1-4543 | NS_000200.1    | - | 317804946 | 317804897 |
| Sma-1-4544 | NW_003038037.1 | - | 854217    | 854168    |
| Sma-1-4545 | NS_000200.1    | - | 251009626 | 251009577 |
| Sma-1-4546 | NW_003038261.1 | + | 576251    | 576300    |
| Sma-1-4547 | NW_003038261.1 | + | 577133    | 577182    |
| Sma-1-4548 | NS_000200.1    | + | 324189902 | 324189951 |
| Sma-1-4549 | NS_000200.1    | + | 324190784 | 324190833 |
| Sma-1-4550 | NW_003037885.1 | + | 519951    | 520000    |
| Sma-1-4551 | NS_000200.1    | + | 128617898 | 128617947 |
| Sma-1-4552 | NW_003037819.1 | + | 319214    | 319263    |
| Sma-1-4553 | NS_000200.1    | + | 51407479  | 51407528  |
| Sma-1-4554 | NW_003037819.1 | - | 2038      | 1989      |
| Sma-1-4555 | NS_000200.1    | - | 51090303  | 51090254  |
| Sma-1-4556 | NW_003037819.1 | + | 187141    | 187190    |
| Sma-1-4557 | NS_000200.1    | + | 51275406  | 51275455  |
| Sma-1-4558 | NW_003038261.1 | - | 696338    | 696289    |
| Sma-1-4559 | NS_000200.1    | - | 324309989 | 324309940 |
| Sma-1-4560 | NW_003037885.1 | - | 483038    | 482989    |
| Sma-1-4561 | NS_000200.1    | - | 128580985 | 128580936 |
| Sma-1-4562 | NW_003038035.1 | + | 394835    | 394884    |
| Sma-1-4563 | NS_000200.1    | + | 248256327 | 248256376 |
| Sma-1-4564 | NW_003038086.1 | + | 265891    | 265940    |
| Sma-1-4565 | NS_000200.1    | + | 272514484 | 272514533 |
| Sma-1-4566 | NW_003037937.1 | + | 541249    | 541298    |
| Sma-1-4567 | NS_000200.1    | + | 181741158 | 181741207 |
| Sma-1-4568 | NW_003037935.1 | + | 899653    | 899702    |
| Sma-1-4569 | NS_000200.1    | + | 180316188 | 180316237 |
| Sma-1-4570 | NW_003037924.1 | + | 541079    | 541128    |
| Sma-1-4571 | NS_000200.1    | + | 172248037 | 172248086 |
| Sma-1-4572 | NW_003038053.1 | - | 73665     | 73616     |
| Sma-1-4573 | NS_000200.1    | - | 257433760 | 257433711 |
| Sma-1-4574 | NW_003037915.1 | - | 297694    | 297645    |
| Sma-1-4575 | NS_000200.1    | - | 162197680 | 162197631 |
| Sma-1-4576 | NW_003037915.1 | - | 1043559   | 1043510   |
| Sma-1-4577 | NS_000200.1    | - | 162943545 | 162943496 |
| Sma-1-4578 | NW_003037873.1 | - | 508112    | 508063    |
| Sma-1-4579 | NS_000200.1    | - | 119247240 | 119247191 |
| Sma-1-4580 | NW_003037885.1 | + | 1018043   | 1018092   |
| Sma-1-4581 | NS_000200.1    | + | 129115990 | 129116039 |
| Sma-1-4582 | NW_003037819.1 | + | 135481    | 135530    |
| Sma-1-4583 | NS_000200.1    | + | 51223746  | 51223795  |
| Sma-1-4584 | NW_003038036.1 | - | 265977    | 265928    |

|            |                |   |           |           |
|------------|----------------|---|-----------|-----------|
| Sma-1-4585 | NS_000200.1    | - | 249199829 | 249199780 |
| Sma-1-4586 | NW_003037819.1 | + | 1128555   | 1128604   |
| Sma-1-4587 | NS_000200.1    | + | 52216820  | 52216869  |
| Sma-1-4588 | NW_003037802.1 | + | 871019    | 871068    |
| Sma-1-4589 | NS_000200.1    | + | 22873813  | 22873862  |
| Sma-1-4590 | NW_003038036.1 | + | 311575    | 311624    |
| Sma-1-4591 | NS_000200.1    | + | 249245427 | 249245476 |
| Sma-1-4592 | NW_003035881.1 | + | 125353    | 125402    |
| Sma-1-4593 | NS_000200.1    | + | 341189558 | 341189607 |
| Sma-1-4594 | NW_003037819.1 | + | 1058318   | 1058367   |
| Sma-1-4595 | NS_000200.1    | + | 52146583  | 52146632  |
| Sma-1-4596 | NW_003037796.1 | - | 1810201   | 1810152   |
| Sma-1-4597 | NS_000200.1    | - | 10019845  | 10019796  |
| Sma-1-4598 | NW_003038036.1 | - | 902737    | 902688    |
| Sma-1-4599 | NS_000200.1    | - | 249836589 | 249836540 |
| Sma-1-4600 | NW_003038037.1 | - | 1307217   | 1307168   |
| Sma-1-4601 | NS_000200.1    | - | 251462626 | 251462577 |
| Sma-1-4602 | NW_003038037.1 | + | 1587024   | 1587073   |
| Sma-1-4603 | NS_000200.1    | + | 251742433 | 251742482 |
| Sma-1-4604 | NW_003038443.1 | + | 35868     | 35917     |
| Sma-1-4605 | NS_000200.1    | + | 330065514 | 330065563 |
| Sma-1-4606 | NW_003038086.1 | + | 764123    | 764172    |
| Sma-1-4607 | NS_000200.1    | + | 273012716 | 273012765 |
| Sma-1-4608 | NW_003037943.1 | - | 434828    | 434779    |
| Sma-1-4609 | NS_000200.1    | - | 187456361 | 187456312 |
| Sma-1-4610 | NW_003038156.1 | - | 158731    | 158682    |
| Sma-1-4611 | NS_000200.1    | - | 294890844 | 294890795 |
| Sma-1-4612 | NW_003037818.1 | + | 92235     | 92284     |
| Sma-1-4613 | NS_000200.1    | + | 48807642  | 48807691  |
| Sma-1-4614 | NW_003037818.1 | - | 917808    | 917759    |
| Sma-1-4615 | NS_000200.1    | - | 49633215  | 49633166  |
| Sma-1-4616 | NW_003038156.1 | + | 282831    | 282880    |
| Sma-1-4617 | NS_000200.1    | + | 295014944 | 295014993 |
| Sma-1-4618 | NW_003037943.1 | + | 1093946   | 1093995   |
| Sma-1-4619 | NS_000200.1    | + | 188115479 | 188115528 |
| Sma-1-4620 | NW_003037884.1 | - | 727223    | 727174    |
| Sma-1-4621 | NS_000200.1    | - | 127506888 | 127506839 |
| Sma-1-4622 | NW_003036292.1 | - | 284       | 235       |
| Sma-1-4623 | NS_000200.1    | - | 359576825 | 359576776 |
| Sma-1-4624 | NW_003038458.1 | - | 19843     | 19794     |
| Sma-1-4625 | NS_000200.1    | - | 331139496 | 331139447 |
| Sma-1-4626 | NW_003038156.1 | + | 490406    | 490455    |
| Sma-1-4627 | NS_000200.1    | + | 295222519 | 295222568 |
| Sma-1-4628 | NW_003038037.1 | + | 700637    | 700686    |
| Sma-1-4629 | NS_000200.1    | + | 250856046 | 250856095 |
| Sma-1-4630 | NW_003039130.1 | + | 5879      | 5928      |
| Sma-1-4631 | NS_000200.1    | + | 317680490 | 317680539 |
| Sma-1-4632 | NW_003038157.1 | + | 117803    | 117852    |
| Sma-1-4633 | NS_000200.1    | + | 295368723 | 295368772 |
| Sma-1-4634 | NW_003037912.1 | + | 942999    | 943048    |
| Sma-1-4635 | NS_000200.1    | + | 157754574 | 157754623 |
| Sma-1-4636 | NW_003038468.1 | + | 22802     | 22851     |

|            |                |   |           |           |
|------------|----------------|---|-----------|-----------|
| Sma-1-4637 | NS_000200.1    | + | 331731072 | 331731121 |
| Sma-1-4638 | NW_003037875.1 | + | 447880    | 447929    |
| Sma-1-4639 | NS_000200.1    | + | 120476549 | 120476598 |
| Sma-1-4640 | NW_003037884.1 | - | 1069223   | 1069174   |
| Sma-1-4641 | NS_000200.1    | - | 127848888 | 127848839 |
| Sma-1-4642 | NW_003038124.1 | - | 34720     | 34671     |
| Sma-1-4643 | NS_000200.1    | - | 279027364 | 279027315 |
| Sma-1-4644 | NW_003038159.1 | + | 103277    | 103326    |
| Sma-1-4645 | NS_000200.1    | + | 296491298 | 296491347 |
| Sma-1-4646 | NW_003037807.1 | + | 176892    | 176941    |
| Sma-1-4647 | NS_000200.1    | + | 30438408  | 30438457  |
| Sma-1-4648 | NW_003038517.1 | - | 276953    | 276904    |
| Sma-1-4649 | NS_000200.1    | - | 341041441 | 341041392 |
| Sma-1-4650 | NW_003037806.1 | - | 245412    | 245363    |
| Sma-1-4651 | NS_000200.1    | - | 28440626  | 28440577  |
| Sma-1-4652 | NW_003037794.1 | - | 511630    | 511581    |
| Sma-1-4653 | NS_000200.1    | - | 4691225   | 4691176   |
| Sma-1-4654 | NW_003038481.1 | + | 87047     | 87096     |
| Sma-1-4655 | NS_000200.1    | + | 332870770 | 332870819 |
| Sma-1-4656 | NW_003038483.1 | + | 29024     | 29073     |
| Sma-1-4657 | NS_000200.1    | + | 333209282 | 333209331 |
| Sma-1-4658 | NW_003037818.1 | + | 2250627   | 2250676   |
| Sma-1-4659 | NS_000200.1    | + | 50966034  | 50966083  |
| Sma-1-4660 | NW_003037818.1 | - | 220753    | 220704    |
| Sma-1-4661 | NS_000200.1    | - | 48936160  | 48936111  |
| Sma-1-4662 | NW_003037550.1 | - | 1828      | 1779      |
| Sma-1-4663 | NS_000200.1    | - | 371617265 | 371617216 |
| Sma-1-4664 | NW_003038160.1 | - | 24925     | 24876     |
| Sma-1-4665 | NS_000200.1    | - | 296776856 | 296776807 |
| Sma-1-4666 | NW_003037882.1 | + | 97877     | 97926     |
| Sma-1-4667 | NS_000200.1    | + | 125389551 | 125389600 |
| Sma-1-4668 | NW_003037585.1 | + | 4636      | 4685      |
| Sma-1-4669 | NS_000200.1    | + | 372525807 | 372525856 |
| Sma-1-4670 | NW_003037913.1 | + | 279408    | 279457    |
| Sma-1-4671 | NS_000200.1    | + | 158843159 | 158843208 |
| Sma-1-4672 | NW_003038501.1 | + | 190062    | 190111    |
| Sma-1-4673 | NS_000200.1    | + | 334984114 | 334984163 |
| Sma-1-4674 | NW_003038038.1 | + | 381584    | 381633    |
| Sma-1-4675 | NS_000200.1    | + | 252284977 | 252285026 |
| Sma-1-4676 | NW_003037913.1 | + | 347690    | 347739    |
| Sma-1-4677 | NS_000200.1    | + | 158911441 | 158911490 |
| Sma-1-4678 | NW_003037641.1 | + | 204       | 253       |
| Sma-1-4679 | NW_003037794.1 | + | 293884    | 293933    |
| Sma-1-4680 | NW_003037865.1 | + | 61715     | 61764     |
| Sma-1-4681 | NS_000200.1    | + | 4473479   | 4473528   |
| Sma-1-4682 | NS_000200.1    | + | 110483634 | 110483683 |
| Sma-1-4683 | NS_000200.1    | + | 374259262 | 374259311 |
| Sma-1-4684 | NW_003038109.1 | - | 191225    | 191176    |
| Sma-1-4685 | NS_000200.1    | - | 275873903 | 275873854 |
| Sma-1-4686 | NW_003038057.1 | - | 293749    | 293700    |
| Sma-1-4687 | NS_000200.1    | - | 259499565 | 259499516 |
| Sma-1-4688 | NW_003038038.1 | - | 468155    | 468106    |



|            |                |   |           |           |
|------------|----------------|---|-----------|-----------|
| Sma-1-4689 | NS.000200.1    | - | 252371548 | 252371499 |
| Sma-1-4690 | NW_003037940.1 | - | 825666    | 825617    |
| Sma-1-4691 | NS.000200.1    | - | 184567796 | 184567747 |
| Sma-1-4692 | NW_003037879.1 | - | 298375    | 298326    |
| Sma-1-4693 | NS.000200.1    | - | 123300631 | 123300582 |
| Sma-1-4694 | NW_003037793.1 | - | 2811076   | 2811027   |
| Sma-1-4695 | NS.000200.1    | - | 2811076   | 2811027   |
| Sma-1-4696 | NW_003037837.1 | + | 438827    | 438877    |
| Sma-1-4697 | NS.000200.1    | + | 77244685  | 77244735  |
| Sma-1-4698 | NW_003037915.1 | - | 903079    | 903029    |
| Sma-1-4699 | NS.000200.1    | - | 162803065 | 162803015 |
| Sma-1-4700 | NW_003037805.1 | - | 422380    | 422330    |
| Sma-1-4701 | NS.000200.1    | - | 26980224  | 26980174  |
| Sma-1-4702 | NW_003038514.1 | - | 102030    | 101980    |
| Sma-1-4703 | NS.000200.1    | - | 339726569 | 339726519 |
| Sma-1-4704 | NW_003037940.1 | - | 696847    | 696798    |
| Sma-1-4705 | NS.000200.1    | - | 184438977 | 184438928 |
| Sma-1-4706 | NW_003038502.1 | + | 66379     | 66428     |
| Sma-1-4707 | NS.000200.1    | + | 335065424 | 335065473 |
| Sma-1-4708 | NW_003037880.1 | + | 319854    | 319903    |
| Sma-1-4709 | NS.000200.1    | + | 124003412 | 124003461 |
| Sma-1-4710 | NW_003037798.1 | - | 1279395   | 1279346   |
| Sma-1-4711 | NS.000200.1    | - | 15538553  | 15538504  |
| Sma-1-4712 | NW_003038505.1 | + | 154080    | 154129    |
| Sma-1-4713 | NS.000200.1    | + | 336233417 | 336233466 |
| Sma-1-4714 | NW_003038110.1 | + | 121940    | 121989    |
| Sma-1-4715 | NS.000200.1    | + | 276288143 | 276288192 |
| Sma-1-4716 | NW_003037918.1 | + | 1711487   | 1711536   |
| Sma-1-4717 | NS.000200.1    | + | 168278477 | 168278526 |
| Sma-1-4718 | NW_003037913.1 | - | 699734    | 699685    |
| Sma-1-4719 | NS.000200.1    | - | 159263485 | 159263436 |
| Sma-1-4720 | NW_003037938.1 | - | 790604    | 790555    |
| Sma-1-4721 | NS.000200.1    | - | 182827717 | 182827668 |
| Sma-1-4722 | NW_003037882.1 | - | 169834    | 169785    |
| Sma-1-4723 | NS.000200.1    | - | 125461508 | 125461459 |
| Sma-1-4724 | NW_003037785.1 | + | 116153    | 116202    |
| Sma-1-4725 | NS.000200.1    | + | 380014820 | 380014869 |
| Sma-1-4726 | NW_003037817.1 | - | 65704     | 65655     |
| Sma-1-4727 | NS.000200.1    | - | 47448056  | 47448007  |
| Sma-1-4728 | NW_003037940.1 | - | 436818    | 436769    |
| Sma-1-4729 | NS.000200.1    | - | 184178948 | 184178899 |
| Sma-1-4730 | NW_003037806.1 | - | 1318910   | 1318861   |
| Sma-1-4731 | NS.000200.1    | - | 29514124  | 29514075  |
| Sma-1-4732 | NW_003037813.1 | - | 1726990   | 1726941   |
| Sma-1-4733 | NS.000200.1    | - | 42713853  | 42713804  |
| Sma-1-4734 | NW_003037787.1 | + | 194731    | 194780    |
| Sma-1-4735 | NS.000200.1    | + | 380442900 | 380442949 |
| Sma-1-4736 | NW_003037881.1 | + | 642318    | 642367    |
| Sma-1-4737 | NS.000200.1    | + | 125074109 | 125074158 |
| Sma-1-4738 | NW_003037918.1 | + | 2217112   | 2217161   |
| Sma-1-4739 | NS.000200.1    | + | 168784102 | 168784151 |
| Sma-1-4740 | NW_003037798.1 | + | 1901516   | 1901565   |

|            |                |   |           |           |
|------------|----------------|---|-----------|-----------|
| Sma-1-4741 | NS_000200.1    | + | 16160674  | 16160723  |
| Sma-1-4742 | NW_003037817.1 | - | 599712    | 599663    |
| Sma-1-4743 | NS_000200.1    | - | 47982064  | 47982015  |
| Sma-1-4744 | NW_003037809.1 | - | 2212895   | 2212846   |
| Sma-1-4745 | NS_000200.1    | - | 35877359  | 35877310  |
| Sma-1-4746 | NW_003037925.1 | + | 357601    | 357650    |
| Sma-1-4747 | NS_000200.1    | + | 172759604 | 172759653 |
| Sma-1-4748 | NW_003037800.1 | - | 1166230   | 1166181   |
| Sma-1-4749 | NS_000200.1    | - | 19795590  | 19795541  |
| Sma-1-4750 | NW_003037788.1 | - | 209470    | 209421    |
| Sma-1-4751 | NS_000200.1    | - | 380656708 | 380656659 |
| Sma-1-4752 | NW_003037928.1 | + | 513693    | 513742    |
| Sma-1-4753 | NS_000200.1    | + | 174837646 | 174837695 |
| Sma-1-4754 | NW_003037925.1 | + | 207272    | 207321    |
| Sma-1-4755 | NS_000200.1    | + | 172609275 | 172609324 |
| Sma-1-4756 | NW_003037800.1 | + | 1436208   | 1436257   |
| Sma-1-4757 | NS_000200.1    | + | 20065568  | 20065617  |
| Sma-1-4758 | NW_003037804.1 | - | 766809    | 766760    |
| Sma-1-4759 | NW_003038169.1 | + | 780       | 829       |
| Sma-1-4760 | NS_000200.1    | + | 300483948 | 300483997 |
| Sma-1-4761 | NS_000200.1    | - | 25906829  | 25906780  |
| Sma-1-4762 | NW_003037809.1 | - | 1618936   | 1618887   |
| Sma-1-4763 | NS_000200.1    | - | 35283400  | 35283351  |
| Sma-1-4764 | NW_003037800.1 | + | 1768958   | 1769007   |
| Sma-1-4765 | NS_000200.1    | + | 20398318  | 20398367  |
| Sma-1-4766 | NW_003037800.1 | - | 1864537   | 1864488   |
| Sma-1-4767 | NS_000200.1    | - | 20493897  | 20493848  |
| Sma-1-4768 | NW_003037924.1 | - | 180668    | 180619    |
| Sma-1-4769 | NS_000200.1    | - | 171887626 | 171887577 |
| Sma-1-4770 | NW_003037939.1 | - | 764503    | 764454    |
| Sma-1-4771 | NS_000200.1    | - | 183634257 | 183634208 |
| Sma-1-4772 | NW_003037914.1 | - | 1407496   | 1407447   |
| Sma-1-4773 | NS_000200.1    | - | 161551746 | 161551697 |
| Sma-1-4774 | NW_003037800.1 | + | 2075041   | 2075090   |
| Sma-1-4775 | NS_000200.1    | + | 20704401  | 20704450  |
| Sma-1-4776 | NW_003037800.1 | + | 2155976   | 2156025   |
| Sma-1-4777 | NS_000200.1    | + | 20785336  | 20785385  |
| Sma-1-4778 | NW_003037800.1 | - | 321363    | 321314    |
| Sma-1-4779 | NS_000200.1    | - | 18950723  | 18950674  |
| Sma-1-4780 | NW_003037809.1 | + | 2778255   | 2778304   |
| Sma-1-4781 | NS_000200.1    | + | 36442719  | 36442768  |
| Sma-1-4782 | NW_003037816.1 | + | 403020    | 403069    |
| Sma-1-4783 | NS_000200.1    | + | 46611892  | 46611941  |
| Sma-1-4784 | NW_003037922.1 | + | 355184    | 355233    |
| Sma-1-4785 | NS_000200.1    | + | 170279181 | 170279230 |
| Sma-1-4786 | NW_003037816.1 | - | 283140    | 283091    |
| Sma-1-4787 | NS_000200.1    | - | 46492012  | 46491963  |
| Sma-1-4788 | NW_003037881.1 | + | 81326     | 81375     |
| Sma-1-4789 | NS_000200.1    | + | 124513117 | 124513166 |
| Sma-1-4790 | NW_003037922.1 | - | 177095    | 177046    |
| Sma-1-4791 | NS_000200.1    | - | 170101092 | 170101043 |
| Sma-1-4792 | NW_003037922.1 | - | 163631    | 163582    |

|            |                |   |           |           |
|------------|----------------|---|-----------|-----------|
| Sma-1-4793 | NS_000200.1    | - | 170087628 | 170087579 |
| Sma-1-4794 | NW_003037926.1 | - | 307236    | 307187    |
| Sma-1-4795 | NS_000200.1    | - | 173475506 | 173475457 |
| Sma-1-4796 | NW_003037801.1 | - | 732022    | 731973    |
| Sma-1-4797 | NS_000200.1    | - | 21821502  | 21821453  |
| Sma-1-4798 | NW_003037801.1 | - | 821213    | 821164    |
| Sma-1-4799 | NS_000200.1    | - | 21910693  | 21910644  |
| Sma-1-4800 | NW_003037917.1 | + | 1399716   | 1399765   |
| Sma-1-4801 | NS_000200.1    | + | 166436520 | 166436569 |
| Sma-1-4802 | NW_003037793.1 | + | 1183068   | 1183118   |
| Sma-1-4803 | NS_000200.1    | + | 1183068   | 1183118   |
| Sma-1-4804 | NW_003037803.1 | - | 323566    | 323517    |
| Sma-1-4805 | NS_000200.1    | - | 23824103  | 23824054  |
| Sma-1-4806 | NW_003037929.1 | + | 323206    | 323255    |
| Sma-1-4807 | NS_000200.1    | + | 175563984 | 175564033 |
| Sma-1-4808 | NW_003037793.1 | - | 1432871   | 1432822   |
| Sma-1-4809 | NS_000200.1    | - | 1432871   | 1432822   |
| Sma-1-4810 | NW_003037802.1 | + | 62918     | 62967     |
| Sma-1-4811 | NS_000200.1    | + | 22065712  | 22065761  |
| Sma-1-4812 | NW_003037917.1 | + | 1407846   | 1407895   |
| Sma-1-4813 | NS_000200.1    | + | 166444650 | 166444699 |
| Sma-1-4814 | NW_003037793.1 | + | 1586301   | 1586350   |
| Sma-1-4815 | NS_000200.1    | + | 1586301   | 1586350   |
| Sma-1-4816 | NW_003037803.1 | + | 1000987   | 1001036   |
| Sma-1-4817 | NS_000200.1    | + | 24501524  | 24501573  |
| Sma-1-4818 | NW_003037914.1 | + | 41147     | 41196     |
| Sma-1-4819 | NS_000200.1    | + | 160185397 | 160185446 |
| Sma-1-4820 | NW_003037814.1 | - | 544738    | 544689    |
| Sma-1-4821 | NS_000200.1    | - | 43528598  | 43528549  |
| Sma-1-4822 | NW_003037814.1 | + | 502742    | 502791    |
| Sma-1-4823 | NS_000200.1    | + | 43486602  | 43486651  |
| Sma-1-4824 | NW_003038516.1 | - | 86319     | 86270     |
| Sma-1-4825 | NW_003038129.1 | - | 112133    | 112084    |
| Sma-1-4826 | NS_000200.1    | - | 340574724 | 340574675 |
| Sma-1-4827 | NS_000200.1    | - | 281365480 | 281365431 |
| Sma-1-4828 | NW_003037807.1 | + | 960701    | 960750    |
| Sma-1-4829 | NS_000200.1    | + | 31222217  | 31222266  |
| Sma-1-4830 | NW_003037939.1 | + | 191937    | 191986    |
| Sma-1-4831 | NS_000200.1    | + | 183061691 | 183061740 |
| Sma-1-4832 | NW_003037970.1 | + | 358461    | 358506    |
| Sma-1-4833 | NS_000200.1    | + | 201414651 | 201414696 |
| env-82     | DQ831701.1     | + | 213       | 258       |
| env-83     | AB231864.1     | - | 4604      | 4559      |
| Sma-1-4834 | NW_003037980.1 | - | 154040    | 153995    |
| Sma-1-4835 | NS_000200.1    | - | 211114902 | 211114857 |
| Sma-1-4836 | NW_003037829.1 | - | 781284    | 781235    |
| Sma-1-4837 | NS_000200.1    | - | 66681822  | 66681773  |
| Sma-1-4838 | NW_003037833.1 | - | 481086    | 481037    |
| Sma-1-4839 | NS_000200.1    | - | 72672182  | 72672133  |
| Sma-1-4840 | NW_003037844.1 | - | 564619    | 564571    |
| Sma-1-4841 | NS_000200.1    | - | 86748065  | 86748017  |
| Sma-1-4842 | NW_003037856.1 | + | 360122    | 360170    |

|            |                |   |           |           |
|------------|----------------|---|-----------|-----------|
| Sma-1-4843 | NS_000200.1    | + | 99718078  | 99718126  |
| Sma-1-4844 | NW_003037881.1 | - | 645384    | 645335    |
| Sma-1-4845 | NS_000200.1    | - | 125077175 | 125077126 |
| Sma-1-4846 | NW_003037918.1 | - | 1656253   | 1656204   |
| Sma-1-4847 | NS_000200.1    | - | 168223243 | 168223194 |
| Sma-1-4848 | NW_003037782.1 | - | 177250    | 177201    |
| Sma-1-4849 | NS_000200.1    | - | 379500693 | 379500644 |
| Sma-1-4850 | NW_003037793.1 | + | 164115    | 164164    |
| Sma-1-4851 | NS_000200.1    | + | 164115    | 164164    |
| Sma-1-4852 | NW_003037864.1 | - | 638621    | 638572    |
| Sma-1-4853 | NS_000200.1    | - | 109131195 | 109131146 |
| Sma-1-4854 | NW_003037809.1 | - | 2403893   | 2403844   |
| Sma-1-4855 | NS_000200.1    | - | 36068357  | 36068308  |
| Sma-1-4856 | NW_003024547.1 | + | 151       | 200       |
| Sma-1-4857 | NW_003037865.1 | - | 85458     | 85409     |
| Sma-1-4858 | NS_000200.1    | + | 348832406 | 348832455 |
| Sma-1-4859 | NS_000200.1    | - | 110507377 | 110507328 |
| Sma-1-4860 | NW_003037914.1 | + | 1230130   | 1230179   |
| Sma-1-4861 | NS_000200.1    | + | 161374380 | 161374429 |
| Sma-1-4862 | NW_003037882.1 | + | 105183    | 105232    |
| Sma-1-4863 | NS_000200.1    | + | 125396857 | 125396906 |
| Sma-1-4864 | NW_003037880.1 | + | 724544    | 724593    |
| Sma-1-4865 | NS_000200.1    | + | 124408102 | 124408151 |
| Sma-1-4866 | NW_003037882.1 | + | 184311    | 184360    |
| Sma-1-4867 | NS_000200.1    | + | 125475985 | 125476034 |
| Sma-1-4868 | NW_003037882.1 | - | 214221    | 214172    |
| Sma-1-4869 | NS_000200.1    | - | 125505895 | 125505846 |
| Sma-1-4870 | NW_003037882.1 | + | 234496    | 234545    |
| Sma-1-4871 | NS_000200.1    | + | 125526170 | 125526219 |
| Sma-1-4872 | NW_003037882.1 | - | 258096    | 258047    |
| Sma-1-4873 | NS_000200.1    | - | 125549770 | 125549721 |
| Sma-1-4874 | NW_003037882.1 | + | 519862    | 519911    |
| Sma-1-4875 | NS_000200.1    | + | 125811536 | 125811585 |
| Sma-1-4876 | NW_003037878.1 | - | 459054    | 459005    |
| Sma-1-4877 | NS_000200.1    | - | 122512532 | 122512483 |
| Sma-1-4878 | NW_003037876.1 | + | 49504     | 49553     |
| Sma-1-4879 | NW_003037797.1 | - | 2899372   | 2899323   |
| Sma-1-4880 | NS_000200.1    | + | 120595140 | 120595189 |
| Sma-1-4881 | NS_000200.1    | - | 13327232  | 13327183  |
| Sma-1-4882 | NW_003037876.1 | - | 478592    | 478543    |
| Sma-1-4883 | NS_000200.1    | - | 121024228 | 121024179 |
| Sma-1-4884 | NW_003037876.1 | - | 26229     | 26180     |
| Sma-1-4885 | NS_000200.1    | - | 120571865 | 120571816 |
| Sma-1-4886 | NW_003037884.1 | - | 1246534   | 1246485   |
| Sma-1-4887 | NS_000200.1    | - | 128026199 | 128026150 |
| Sma-1-4888 | NW_003037882.1 | - | 396638    | 396589    |
| Sma-1-4889 | NS_000200.1    | - | 125688312 | 125688263 |
| Sma-1-4890 | NW_003037884.1 | - | 1288028   | 1287979   |
| Sma-1-4891 | NS_000200.1    | - | 128067693 | 128067644 |
| Sma-1-4892 | NW_003037858.1 | - | 410269    | 410220    |
| Sma-1-4893 | NW_003037918.1 | - | 526588    | 526539    |
| Sma-1-4894 | NS_000200.1    | - | 167093578 | 167093529 |

|            |                |   |           |           |
|------------|----------------|---|-----------|-----------|
| Sma-1-4895 | NS_000200.1    | - | 101074545 | 101074496 |
| Sma-1-4896 | NW_003038150.1 | - | 235441    | 235392    |
| Sma-1-4897 | NS_000200.1    | - | 291714179 | 291714130 |
| Sma-1-4898 | NW_003037859.1 | - | 645692    | 645643    |
| Sma-1-4899 | NS_000200.1    | - | 103324533 | 103324484 |
| Sma-1-4900 | NW_003037885.1 | - | 1080806   | 1080757   |
| Sma-1-4901 | NS_000200.1    | - | 129178753 | 129178704 |
| Sma-1-4902 | NW_003037873.1 | + | 153629    | 153678    |
| Sma-1-4903 | NS_000200.1    | + | 118892757 | 118892806 |
| Sma-1-4904 | NW_003037871.1 | - | 472825    | 472776    |
| Sma-1-4905 | NS_000200.1    | - | 117920563 | 117920514 |
| Sma-1-4906 | NW_003037869.1 | - | 394055    | 394006    |
| Sma-1-4907 | NS_000200.1    | - | 116866400 | 116866351 |
| Sma-1-4908 | NW_003037865.1 | + | 760238    | 760287    |
| Sma-1-4909 | NS_000200.1    | + | 111182157 | 111182206 |
| Sma-1-4910 | NW_003037865.1 | - | 564355    | 564306    |
| Sma-1-4911 | NS_000200.1    | - | 110986274 | 110986225 |
| Sma-1-4912 | NW_003037863.1 | + | 998370    | 998419    |
| Sma-1-4913 | NS_000200.1    | + | 107756737 | 107756786 |
| Sma-1-4914 | NW_003037913.1 | - | 73572     | 73523     |
| Sma-1-4915 | NS_000200.1    | - | 158637323 | 158637274 |
| Sma-1-4916 | NW_003037589.1 | + | 16929     | 16978     |
| Sma-1-4917 | NS_000200.1    | + | 372665881 | 372665930 |
| Sma-1-4918 | NW_003038518.1 | + | 664834    | 664883    |
| Sma-1-4919 | NS_000200.1    | + | 342301667 | 342301716 |
| Sma-1-4920 | NW_003039129.1 | - | 241426    | 241377    |
| Sma-1-4921 | NS_000200.1    | - | 229196234 | 229196185 |
| Sma-1-4922 | NW_003038099.1 | - | 33109     | 33060     |
| Sma-1-4923 | NS_000200.1    | - | 274491322 | 274491273 |
| Sma-1-4924 | NW_003026517.1 | + | 374519    | 374568    |
| Sma-1-4925 | NS_000200.1    | + | 299980528 | 299980577 |
| Sma-1-4926 | NW_003038129.1 | - | 25982     | 25933     |
| Sma-1-4927 | NS_000200.1    | - | 281279329 | 281279280 |
| Sma-1-4928 | NW_003031890.1 | + | 439       | 488       |
| Sma-1-4929 | NW_003037982.1 | + | 1194458   | 1194507   |
| Sma-1-4930 | NW_003038141.1 | + | 164251    | 164300    |
| Sma-1-4931 | NS_000200.1    | + | 214853653 | 214853702 |
| Sma-1-4932 | NS_000200.1    | + | 287054230 | 287054279 |
| Sma-1-4933 | NS_000200.1    | + | 367216480 | 367216529 |
| Sma-1-4934 | NW_003026465.1 | - | 381101    | 381052    |
| Sma-1-4935 | NS_000200.1    | - | 207773695 | 207773646 |
| Sma-1-4936 | NW_003037929.1 | + | 111855    | 111904    |
| Sma-1-4937 | NW_003026456.1 | - | 562202    | 562153    |
| Sma-1-4938 | NW_003037804.1 | - | 776119    | 776070    |
| Sma-1-4939 | NW_003037841.1 | - | 558348    | 558299    |
| Sma-1-4940 | NW_003037889.1 | - | 1808388   | 1808339   |
| Sma-1-4941 | NW_003037982.1 | - | 240533    | 240484    |
| Sma-1-4942 | NS_000200.1    | + | 175352633 | 175352682 |
| Sma-1-4943 | NS_000200.1    | - | 213899728 | 213899679 |
| Sma-1-4944 | NS_000200.1    | - | 135584878 | 135584829 |
| Sma-1-4945 | NS_000200.1    | - | 83169529  | 83169480  |
| Sma-1-4946 | NS_000200.1    | - | 58485338  | 58485289  |

|            |                |   |           |           |
|------------|----------------|---|-----------|-----------|
| Sma-1-4947 | NS_000200.1    | - | 25916139  | 25916090  |
| Sma-1-4948 | NW_003037818.1 | + | 2043635   | 2043684   |
| Sma-1-4949 | NS_000200.1    | + | 50759042  | 50759091  |
| Sma-1-4950 | NW_003037829.1 | + | 1088990   | 1089039   |
| Sma-1-4951 | NS_000200.1    | + | 66989528  | 66989577  |
| Sma-1-4952 | NW_003037863.1 | + | 1277013   | 1277062   |
| Sma-1-4953 | NS_000200.1    | + | 108035380 | 108035429 |
| Sma-1-4954 | NW_003037887.1 | + | 1453428   | 1453477   |
| Sma-1-4955 | NS_000200.1    | + | 131917406 | 131917455 |
| Sma-1-4956 | NW_003037887.1 | + | 1551844   | 1551893   |
| Sma-1-4957 | NW_003038158.1 | + | 88160     | 88209     |
| Sma-1-4958 | NS_000200.1    | + | 132015822 | 132015871 |
| Sma-1-4959 | NS_000200.1    | + | 295971328 | 295971377 |
| Sma-1-4960 | NW_003037862.1 | + | 757132    | 757181    |
| Sma-1-4961 | NS_000200.1    | + | 106408793 | 106408842 |
| Sma-1-4962 | NW_003037887.1 | - | 369381    | 369332    |
| Sma-1-4963 | NS_000200.1    | - | 130833359 | 130833310 |
| Sma-1-4964 | NW_003037860.1 | - | 525708    | 525659    |
| Sma-1-4965 | NS_000200.1    | - | 104268736 | 104268687 |
| Sma-1-4966 | NW_003037889.1 | - | 1247758   | 1247709   |
| Sma-1-4967 | NW_003038149.1 | - | 228143    | 228094    |
| Sma-1-4968 | NS_000200.1    | - | 291256756 | 291256707 |
| Sma-1-4969 | NS_000200.1    | - | 135024248 | 135024199 |
| Sma-1-4970 | NW_003037854.1 | + | 520090    | 520139    |
| Sma-1-4971 | NS_000200.1    | + | 97424511  | 97424560  |
| Sma-1-4972 | NW_003037890.1 | + | 780074    | 780123    |
| Sma-1-4973 | NS_000200.1    | + | 136463435 | 136463484 |
| Sma-1-4974 | NW_003037852.1 | - | 660595    | 660546    |
| Sma-1-4975 | NW_003037865.1 | - | 214865    | 214816    |
| Sma-1-4976 | NS_000200.1    | - | 110636784 | 110636735 |
| Sma-1-4977 | NS_000200.1    | - | 95052490  | 95052441  |
| Sma-1-4978 | NW_003037889.1 | + | 1844462   | 1844511   |
| Sma-1-4979 | NS_000200.1    | + | 135620952 | 135621001 |
| Sma-1-4980 | NW_003037889.1 | - | 412026    | 411977    |
| Sma-1-4981 | NS_000200.1    | - | 134188516 | 134188467 |
| Sma-1-4982 | NW_003026462.1 | + | 339942    | 339991    |
| Sma-1-4983 | NW_003037820.1 | + | 716416    | 716465    |
| Sma-1-4984 | NW_003037851.1 | - | 713394    | 713345    |
| Sma-1-4985 | NW_003037940.1 | + | 330419    | 330468    |
| Sma-1-4986 | NW_003038230.1 | - | 242924    | 242875    |
| Sma-1-4987 | NS_000200.1    | + | 52989398  | 52989447  |
| Sma-1-4988 | NS_000200.1    | + | 184072549 | 184072598 |
| Sma-1-4989 | NS_000200.1    | + | 197007445 | 197007494 |
| Sma-1-4990 | NS_000200.1    | - | 311528495 | 311528446 |
| Sma-1-4991 | NS_000200.1    | - | 94116704  | 94116655  |
| Sma-1-4992 | NW_003035431.1 | + | 218       | 267       |
| Sma-1-4993 | NS_000200.1    | + | 367454815 | 367454864 |
| Sma-1-4994 | NW_003037890.1 | + | 1392269   | 1392318   |
| Sma-1-4995 | NS_000200.1    | + | 137075630 | 137075679 |
| Sma-1-4996 | NW_003037853.1 | + | 176394    | 176443    |
| Sma-1-4997 | NS_000200.1    | + | 95668445  | 95668494  |
| Sma-1-4998 | NW_003037853.1 | + | 1048326   | 1048375   |

|            |                |   |           |           |
|------------|----------------|---|-----------|-----------|
| Sma-1-4999 | NS_000200.1    | + | 96540377  | 96540426  |
| Sma-1-5000 | NW_003037822.1 | + | 460208    | 460257    |
| Sma-1-5001 | NS_000200.1    | + | 54768214  | 54768263  |
| Sma-1-5002 | NW_003026612.1 | - | 223365    | 223316    |
| Sma-1-5003 | NS_000200.1    | - | 312528752 | 312528703 |
| Sma-1-5004 | NW_003037866.1 | + | 766313    | 766362    |
| Sma-1-5005 | NW_003037899.1 | + | 326311    | 326360    |
| Sma-1-5006 | NS_000200.1    | + | 112254112 | 112254161 |
| Sma-1-5007 | NS_000200.1    | + | 144845422 | 144845471 |
| Sma-1-5008 | NW_003037890.1 | - | 1597752   | 1597703   |
| Sma-1-5009 | NS_000200.1    | - | 137281113 | 137281064 |
| Sma-1-5010 | NW_003024033.1 | + | 1156      | 1205      |
| Sma-1-5011 | NS_000200.1    | + | 344497301 | 344497350 |
| Sma-1-5012 | NW_003035881.1 | - | 139539    | 139490    |
| Sma-1-5013 | NW_003038125.1 | - | 85183     | 85134     |
| Sma-1-5014 | NS_000200.1    | - | 341203744 | 341203695 |
| Sma-1-5015 | NS_000200.1    | - | 279522139 | 279522090 |
| Sma-1-5016 | NW_003037821.1 | + | 223703    | 223752    |
| Sma-1-5017 | NS_000200.1    | + | 53368187  | 53368236  |
| Sma-1-5018 | NW_003037806.1 | - | 359575    | 359526    |
| Sma-1-5019 | NS_000200.1    | - | 28554789  | 28554740  |
| Sma-1-5020 | NW_003037799.1 | + | 574778    | 574827    |
| Sma-1-5021 | NS_000200.1    | + | 17565132  | 17565181  |
| Sma-1-5022 | NW_003037992.1 | - | 199851    | 199802    |
| Sma-1-5023 | NS_000200.1    | - | 218041332 | 218041283 |
| Sma-1-5024 | NW_003038005.1 | - | 469457    | 469408    |
| Sma-1-5025 | NS_000200.1    | - | 224875411 | 224875362 |
| Sma-1-5026 | NW_003038042.1 | + | 100747    | 100796    |
| Sma-1-5027 | NS_000200.1    | + | 254046346 | 254046395 |
| Sma-1-5028 | NW_003037918.1 | - | 600336    | 600287    |
| Sma-1-5029 | NS_000200.1    | - | 167167326 | 167167277 |
| Sma-1-5030 | NW_003038035.1 | + | 188280    | 188329    |
| Sma-1-5031 | NS_000200.1    | + | 248049772 | 248049821 |
| Sma-1-5032 | NW_003037822.1 | + | 400674    | 400723    |
| Sma-1-5033 | NS_000200.1    | + | 54708680  | 54708729  |
| Sma-1-5034 | NW_003037801.1 | + | 672107    | 672156    |
| Sma-1-5035 | NS_000200.1    | + | 21761587  | 21761636  |
| Sma-1-5036 | NW_003037945.1 | + | 393903    | 393952    |
| Sma-1-5037 | NS_000200.1    | + | 189495867 | 189495916 |
| Sma-1-5038 | NW_003034822.1 | - | 1765      | 1716      |
| Sma-1-5039 | NS_000200.1    | - | 347049489 | 347049440 |
| Sma-1-5040 | NW_003038258.1 | + | 283386    | 283435    |
| Sma-1-5041 | NS_000200.1    | + | 322821896 | 322821945 |
| Sma-1-5042 | NW_003020596.1 | + | 2136      | 2185      |
| Sma-1-5043 | NW_003026490.1 | + | 100854    | 100903    |
| Sma-1-5044 | NS_000200.1    | + | 267732570 | 267732619 |
| Sma-1-5045 | NS_000200.1    | + | 360344148 | 360344197 |
| Sma-1-5046 | NW_003037836.1 | + | 848190    | 848239    |
| Sma-1-5047 | NS_000200.1    | + | 76405289  | 76405338  |
| Sma-1-5048 | NW_003037851.1 | + | 572479    | 572528    |
| Sma-1-5049 | NS_000200.1    | + | 93975789  | 93975838  |
| Sma-1-5050 | NW_003037891.1 | + | 2138289   | 2138338   |

|            |                |   |           |           |
|------------|----------------|---|-----------|-----------|
| Sma-1-5051 | NS_000200.1    | + | 140019567 | 140019616 |
| Sma-1-5052 | NW_003037841.1 | - | 1602688   | 1602639   |
| Sma-1-5053 | NW_003037916.1 | + | 1131211   | 1131260   |
| Sma-1-5054 | NS_000200.1    | + | 164324622 | 164324671 |
| Sma-1-5055 | NS_000200.1    | - | 84213869  | 84213820  |
| Sma-1-5056 | NW_003037840.1 | + | 367128    | 367177    |
| Sma-1-5057 | NS_000200.1    | + | 80990452  | 80990501  |
| Sma-1-5058 | NW_003037901.1 | + | 399662    | 399711    |
| Sma-1-5059 | NS_000200.1    | + | 146248123 | 146248172 |
| Sma-1-5060 | NW_003037906.1 | + | 484394    | 484443    |
| Sma-1-5061 | NS_000200.1    | + | 150792173 | 150792222 |
| Sma-1-5062 | NW_003037911.1 | - | 409179    | 409130    |
| Sma-1-5063 | NS_000200.1    | - | 156196532 | 156196483 |
| Sma-1-5064 | NW_003037913.1 | - | 939597    | 939548    |
| Sma-1-5065 | NS_000200.1    | - | 159503348 | 159503299 |
| Sma-1-5066 | NW_003037914.1 | - | 156352    | 156303    |
| Sma-1-5067 | NS_000200.1    | - | 160300602 | 160300553 |
| Sma-1-5068 | NW_003037925.1 | + | 138314    | 138363    |
| Sma-1-5069 | NS_000200.1    | + | 172540317 | 172540366 |
| Sma-1-5070 | NW_003038011.1 | + | 97261     | 97310     |
| Sma-1-5071 | NS_000200.1    | + | 227624911 | 227624960 |
| Sma-1-5072 | NW_003038014.1 | + | 108133    | 108182    |
| Sma-1-5073 | NS_000200.1    | + | 229848822 | 229848871 |
| Sma-1-5074 | NW_003038242.1 | + | 224957    | 225006    |
| Sma-1-5075 | NS_000200.1    | + | 314924103 | 314924152 |
| Sma-1-5076 | NW_003038321.1 | - | 280       | 231       |
| Sma-1-5077 | NS_000200.1    | - | 326143348 | 326143299 |
| Sma-1-5078 | NW_003038306.1 | - | 505927    | 505878    |
| Sma-1-5079 | NS_000200.1    | - | 249439779 | 249439730 |
| Sma-1-5080 | NW_003035639.1 | + | 11289     | 11338     |
| Sma-1-5081 | NW_003037795.1 | + | 1178969   | 1179018   |
| Sma-1-5082 | NW_003037825.1 | + | 292733    | 292782    |
| Sma-1-5083 | NW_003038246.1 | - | 176547    | 176498    |
| Sma-1-5084 | NW_003026481.1 | - | 80657     | 80608     |
| Sma-1-5085 | NW_003038058.1 | - | 129066    | 129017    |
| Sma-1-5086 | NW_003038083.1 | + | 764068    | 764117    |
| Sma-1-5087 | NS_000200.1    | + | 7569852   | 7569901   |
| Sma-1-5088 | NS_000200.1    | + | 59422515  | 59422564  |
| Sma-1-5089 | NS_000200.1    | + | 271007405 | 271007454 |
| Sma-1-5090 | NS_000200.1    | + | 329961729 | 329961778 |
| Sma-1-5091 | NS_000200.1    | - | 315817675 | 315817626 |
| Sma-1-5092 | NS_000200.1    | - | 259960266 | 259960217 |
| Sma-1-5093 | NS_000200.1    | - | 255480641 | 255480592 |
| Sma-1-5094 | NW_003037836.1 | - | 750392    | 750341    |
| Sma-1-5095 | NS_000200.1    | - | 76307491  | 76307440  |
| Sma-1-5096 | NW_003037803.1 | - | 1595899   | 1595850   |
| Sma-1-5097 | NS_000200.1    | - | 25096436  | 25096387  |
| Sma-1-5098 | NW_003037926.1 | - | 397236    | 397187    |
| Sma-1-5099 | NW_003038036.1 | + | 266312    | 266361    |
| Sma-1-5100 | NS_000200.1    | + | 249200164 | 249200213 |
| Sma-1-5101 | NS_000200.1    | - | 173565506 | 173565457 |
| Sma-1-5102 | NW_003037940.1 | + | 61866     | 61915     |



|            |                |   |           |           |
|------------|----------------|---|-----------|-----------|
| Sma-1-5103 | NW_003038027.1 | - | 845466    | 845417    |
| Sma-1-5104 | NS_000200.1    | + | 183803996 | 183804045 |
| Sma-1-5105 | NS_000200.1    | - | 241216180 | 241216131 |
| Sma-1-5106 | NW_003037944.1 | + | 580779    | 580828    |
| Sma-1-5107 | NS_000200.1    | + | 188802132 | 188802181 |
| Sma-1-5108 | NW_003038014.1 | + | 531997    | 532046    |
| Sma-1-5109 | NS_000200.1    | + | 230272686 | 230272735 |
| Sma-1-5110 | NW_003038130.1 | + | 293856    | 293905    |
| Sma-1-5111 | NS_000200.1    | + | 281848842 | 281848891 |
| Sma-1-5112 | NW_003026610.1 | - | 3091      | 3042      |
| Sma-1-5113 | NW_003035748.1 | + | 629       | 678       |
| Sma-1-5114 | NW_003038508.1 | - | 18988     | 18939     |
| Sma-1-5115 | NW_003026456.1 | - | 281381    | 281332    |
| Sma-1-5116 | NW_003037798.1 | - | 89166     | 89117     |
| Sma-1-5117 | NW_003037814.1 | - | 1812699   | 1812650   |
| Sma-1-5118 | NW_003037836.1 | + | 4544      | 4593      |
| Sma-1-5119 | NW_003037887.1 | + | 1456525   | 1456574   |
| Sma-1-5120 | NW_003037938.1 | + | 738688    | 738737    |
| Sma-1-5121 | NW_003037938.1 | + | 739452    | 739501    |
| Sma-1-5122 | NW_003037970.1 | - | 401725    | 401676    |
| Sma-1-5123 | NW_003038023.1 | + | 401604    | 401653    |
| Sma-1-5124 | NW_003038037.1 | - | 97966     | 97917     |
| Sma-1-5125 | NW_003038071.1 | - | 22147     | 22098     |
| Sma-1-5126 | NW_003038068.1 | + | 190329    | 190378    |
| Sma-1-5127 | NS_000200.1    | + | 75561643  | 75561692  |
| Sma-1-5128 | NS_000200.1    | + | 131920503 | 131920552 |
| Sma-1-5129 | NS_000200.1    | + | 182775801 | 182775850 |
| Sma-1-5130 | NS_000200.1    | + | 182776565 | 182776614 |
| Sma-1-5131 | NS_000200.1    | + | 237561895 | 237561944 |
| Sma-1-5132 | NS_000200.1    | + | 263257537 | 263257586 |
| Sma-1-5133 | NS_000200.1    | + | 363995115 | 363995164 |
| Sma-1-5134 | NS_000200.1    | - | 337125956 | 337125907 |
| Sma-1-5135 | NS_000200.1    | - | 310158461 | 310158412 |
| Sma-1-5136 | NS_000200.1    | - | 264825190 | 264825141 |
| Sma-1-5137 | NS_000200.1    | - | 250253375 | 250253326 |
| Sma-1-5138 | NS_000200.1    | - | 201457915 | 201457866 |
| Sma-1-5139 | NS_000200.1    | - | 58204517  | 58204468  |
| Sma-1-5140 | NS_000200.1    | - | 44796559  | 44796510  |
| Sma-1-5141 | NS_000200.1    | - | 14348324  | 14348275  |
| Sma-1-5142 | NW_003037982.1 | - | 1206793   | 1206744   |
| Sma-1-5143 | NS_000200.1    | - | 214865988 | 214865939 |
| Sma-1-5144 | NW_003038117.1 | - | 167618    | 167569    |
| Sma-1-5145 | NS_000200.1    | - | 277485443 | 277485394 |
| Sma-1-5146 | NW_003038511.1 | + | 209002    | 209051    |
| Sma-1-5147 | NS_000200.1    | + | 338554214 | 338554263 |
| Sma-1-5148 | NW_003024925.1 | - | 595       | 546       |
| Sma-1-5149 | NW_003037836.1 | - | 796722    | 796673    |
| Sma-1-5150 | NW_003037837.1 | + | 19        | 68        |
| Sma-1-5151 | NW_003037931.1 | - | 45323     | 45274     |
| Sma-1-5152 | NW_003038148.1 | - | 486286    | 486237    |
| Sma-1-5153 | NS_000200.1    | + | 76805877  | 76805926  |
| Sma-1-5154 | NS_000200.1    | - | 355717955 | 355717906 |

|            |                |   |           |           |
|------------|----------------|---|-----------|-----------|
| Sma-1-5155 | NS.000200.1    | - | 290560270 | 290560221 |
| Sma-1-5156 | NS.000200.1    | - | 176877990 | 176877941 |
| Sma-1-5157 | NS.000200.1    | - | 76353821  | 76353772  |
| Sma-1-5158 | NW_003026508.1 | + | 165305    | 165354    |
| Sma-1-5159 | NS.000200.1    | + | 281209919 | 281209968 |
| Sma-1-5160 | NW_003037796.1 | - | 1689328   | 1689279   |
| Sma-1-5161 | NS.000200.1    | - | 9898972   | 9898923   |
| Sma-1-5162 | NW_003037800.1 | + | 1558585   | 1558634   |
| Sma-1-5163 | NS.000200.1    | + | 20187945  | 20187994  |
| Sma-1-5164 | NW_003037832.1 | + | 568411    | 568460    |
| Sma-1-5165 | NW_003037859.1 | + | 346091    | 346140    |
| Sma-1-5166 | NW_003037859.1 | + | 351145    | 351194    |
| Sma-1-5167 | NS.000200.1    | + | 71777842  | 71777891  |
| Sma-1-5168 | NS.000200.1    | + | 103024932 | 103024981 |
| Sma-1-5169 | NS.000200.1    | + | 103029986 | 103030035 |
| Sma-1-5170 | NW_003037891.1 | - | 2053364   | 2053315   |
| Sma-1-5171 | NS.000200.1    | - | 139934642 | 139934593 |
| Sma-1-5172 | NW_003037847.1 | - | 339211    | 339162    |
| Sma-1-5173 | NS.000200.1    | - | 88990941  | 88990892  |
| Sma-1-5174 | NW_003026588.1 | - | 28389     | 28340     |
| Sma-1-5175 | NS.000200.1    | - | 303877532 | 303877483 |
| Sma-1-5176 | NW_003038150.1 | + | 318132    | 318181    |
| Sma-1-5177 | NS.000200.1    | + | 291796870 | 291796919 |
| Sma-1-5178 | NW_003038507.1 | - | 25395     | 25346     |
| Sma-1-5179 | NS.000200.1    | - | 336694289 | 336694240 |
| Sma-1-5180 | NW_003037827.1 | - | 218722    | 218673    |
| Sma-1-5181 | NS.000200.1    | - | 62840863  | 62840814  |
| Sma-1-5182 | NW_003026612.1 | + | 13238     | 13287     |
| Sma-1-5183 | NW_003038261.1 | - | 893184    | 893135    |
| Sma-1-5184 | NS.000200.1    | + | 312318625 | 312318674 |
| Sma-1-5185 | NS.000200.1    | - | 324506835 | 324506786 |
| Sma-1-5186 | NW_003037871.1 | + | 388077    | 388126    |
| Sma-1-5187 | NW_003037915.1 | + | 1216778   | 1216827   |
| Sma-1-5188 | NS.000200.1    | + | 117835815 | 117835864 |
| Sma-1-5189 | NS.000200.1    | + | 163116764 | 163116813 |
| Sma-1-5190 | NW_003038037.1 | + | 1227646   | 1227695   |
| Sma-1-5191 | NS.000200.1    | + | 251383055 | 251383104 |
| Sma-1-5192 | NW_003038042.1 | + | 201772    | 201821    |
| Sma-1-5193 | NW_003038080.1 | + | 596429    | 596478    |
| Sma-1-5194 | NS.000200.1    | + | 254147371 | 254147420 |
| Sma-1-5195 | NS.000200.1    | + | 269049039 | 269049088 |
| Sma-1-5196 | NW_003037898.1 | - | 458548    | 458499    |
| Sma-1-5197 | NS.000200.1    | - | 144442370 | 144442321 |
| Sma-1-5198 | NW_003037899.1 | - | 98864     | 98815     |
| Sma-1-5199 | NS.000200.1    | - | 144617975 | 144617926 |
| Sma-1-5200 | NW_003037837.1 | - | 209896    | 209847    |
| Sma-1-5201 | NS.000200.1    | - | 77015754  | 77015705  |
| Sma-1-5202 | NW_003038112.1 | - | 27508     | 27459     |
| Sma-1-5203 | NS.000200.1    | - | 276482686 | 276482637 |
| Sma-1-5204 | NW_003037791.1 | + | 719480    | 719529    |
| Sma-1-5205 | NS.000200.1    | + | 382424908 | 382424957 |
| Sma-1-5206 | NW_003038028.1 | + | 741297    | 741346    |

|            |                |   |           |           |
|------------|----------------|---|-----------|-----------|
| Sma-1-5207 | NS.000200.1    | + | 242048871 | 242048920 |
| Sma-1-5208 | NW_003037804.1 | + | 1333048   | 1333097   |
| Sma-1-5209 | NS.000200.1    | + | 26473068  | 26473117  |
| Sma-1-5210 | NW_003037809.1 | - | 2676911   | 2676862   |
| Sma-1-5211 | NS.000200.1    | - | 36341375  | 36341326  |
| Sma-1-5212 | NW_003037905.1 | + | 218796    | 218845    |
| Sma-1-5213 | NW_003038518.1 | + | 72018     | 72067     |
| Sma-1-5214 | NS.000200.1    | + | 149487808 | 149487857 |
| Sma-1-5215 | NS.000200.1    | + | 341708851 | 341708900 |
| Sma-1-5216 | NW_003038004.1 | - | 140991    | 140942    |
| Sma-1-5217 | NS.000200.1    | - | 224308859 | 224308810 |
| Sma-1-5218 | NW_003037813.1 | - | 415692    | 415643    |
| Sma-1-5219 | NS.000200.1    | - | 41402555  | 41402506  |
| Sma-1-5220 | NW_003037905.1 | + | 297505    | 297554    |
| Sma-1-5221 | NS.000200.1    | + | 149566517 | 149566566 |
| Sma-1-5222 | NW_003037906.1 | - | 121130    | 121081    |
| Sma-1-5223 | NS.000200.1    | - | 150428909 | 150428860 |
| Sma-1-5224 | NW_003038058.1 | - | 292700    | 292651    |
| Sma-1-5225 | NS.000200.1    | - | 260123900 | 260123851 |
| Sma-1-5226 | NW_003037809.1 | - | 2522029   | 2521980   |
| Sma-1-5227 | NS.000200.1    | - | 36186493  | 36186444  |
| Sma-1-5228 | NW_003037829.1 | + | 1745363   | 1745412   |
| Sma-1-5229 | NS.000200.1    | + | 67645901  | 67645950  |
| Sma-1-5230 | NW_003037814.1 | - | 139140    | 139091    |
| Sma-1-5231 | NS.000200.1    | - | 43123000  | 43122951  |
| Sma-1-5232 | NW_003035881.1 | + | 346464    | 346513    |
| Sma-1-5233 | NW_003037914.1 | + | 1131354   | 1131403   |
| Sma-1-5234 | NW_003037974.1 | - | 134620    | 134571    |
| Sma-1-5235 | NW_003026507.1 | - | 279665    | 279616    |
| Sma-1-5236 | NS.000200.1    | + | 161275604 | 161275653 |
| Sma-1-5237 | NS.000200.1    | + | 341410669 | 341410718 |
| Sma-1-5238 | NS.000200.1    | - | 279939816 | 279939767 |
| Sma-1-5239 | NS.000200.1    | - | 204809926 | 204809877 |
| Sma-1-5240 | NW_003037793.1 | - | 2895766   | 2895717   |
| Sma-1-5241 | NS.000200.1    | - | 2895766   | 2895717   |
| Sma-1-5242 | NW_003037827.1 | - | 787713    | 787664    |
| Sma-1-5243 | NS.000200.1    | - | 63409854  | 63409805  |
| Sma-1-5244 | NW_003037907.1 | + | 947749    | 947798    |
| Sma-1-5245 | NW_003037982.1 | + | 240833    | 240882    |
| Sma-1-5246 | NS.000200.1    | + | 152352238 | 152352287 |
| Sma-1-5247 | NS.000200.1    | + | 213900028 | 213900077 |
| Sma-1-5248 | NW_003037908.1 | + | 866670    | 866719    |
| Sma-1-5249 | NS.000200.1    | + | 153339801 | 153339850 |
| Sma-1-5250 | NW_003037826.1 | + | 1274319   | 1274368   |
| Sma-1-5251 | NS.000200.1    | + | 62273835  | 62273884  |
| Sma-1-5252 | NW_003037825.1 | - | 1845764   | 1845715   |
| Sma-1-5253 | NS.000200.1    | - | 60975546  | 60975497  |
| Sma-1-5254 | NW_003037909.1 | + | 680565    | 680614    |
| Sma-1-5255 | NS.000200.1    | + | 154222214 | 154222263 |
| Sma-1-5256 | NW_003037909.1 | - | 943986    | 943937    |
| Sma-1-5257 | NS.000200.1    | - | 154485635 | 154485586 |
| Sma-1-5258 | NW_003038063.1 | + | 252548    | 252597    |

|            |                |   |           |           |
|------------|----------------|---|-----------|-----------|
| Sma-1-5259 | NS_000200.1    | + | 261748826 | 261748875 |
| Sma-1-5260 | NW_003037821.1 | - | 417447    | 417398    |
| Sma-1-5261 | NW_003038028.1 | + | 502139    | 502188    |
| Sma-1-5262 | NS_000200.1    | + | 241809713 | 241809762 |
| Sma-1-5263 | NS_000200.1    | - | 53561931  | 53561882  |
| Sma-1-5264 | NW_003037915.1 | - | 1055382   | 1055333   |
| Sma-1-5265 | NS_000200.1    | - | 162955368 | 162955319 |
| Sma-1-5266 | NW_003037810.1 | - | 1081765   | 1081716   |
| Sma-1-5267 | NS_000200.1    | - | 37686287  | 37686238  |
| Sma-1-5268 | NW_003037944.1 | + | 743452    | 743501    |
| Sma-1-5269 | NS_000200.1    | + | 188964805 | 188964854 |
| Sma-1-5270 | NW_003037805.1 | + | 1093823   | 1093872   |
| Sma-1-5271 | NW_003037863.1 | - | 483454    | 483405    |
| Sma-1-5272 | NW_003038120.1 | - | 201357    | 201308    |
| Sma-1-5273 | NS_000200.1    | + | 27651667  | 27651716  |
| Sma-1-5274 | NS_000200.1    | - | 278386580 | 278386531 |
| Sma-1-5275 | NS_000200.1    | - | 107241821 | 107241772 |
| Sma-1-5276 | NW_003037797.1 | + | 1367445   | 1367494   |
| Sma-1-5277 | NS_000200.1    | + | 11795305  | 11795354  |
| Sma-1-5278 | NW_003038070.1 | - | 264767    | 264718    |
| Sma-1-5279 | NS_000200.1    | - | 264602008 | 264601959 |
| Sma-1-5280 | NW_003037815.1 | - | 519883    | 519834    |
| Sma-1-5281 | NW_003037990.1 | - | 237678    | 237629    |
| Sma-1-5282 | NW_003038076.1 | + | 524726    | 524775    |
| Sma-1-5283 | NS_000200.1    | + | 266741900 | 266741949 |
| Sma-1-5284 | NS_000200.1    | - | 217136437 | 217136388 |
| Sma-1-5285 | NS_000200.1    | - | 45782874  | 45782825  |
| Sma-1-5286 | NW_003026616.1 | + | 129659    | 129708    |
| Sma-1-5287 | NS_000200.1    | + | 317486258 | 317486307 |
| Sma-1-5288 | NW_003038252.1 | - | 418759    | 418710    |
| Sma-1-5289 | NW_003038117.1 | + | 206559    | 206608    |
| Sma-1-5290 | NS_000200.1    | + | 277524384 | 277524433 |
| Sma-1-5291 | NS_000200.1    | - | 319274347 | 319274298 |
| Sma-1-5292 | NW_003035872.1 | + | 7036      | 7085      |
| Sma-1-5293 | NS_000200.1    | + | 335628783 | 335628832 |
| Sma-1-5294 | NW_003038462.1 | - | 52372     | 52323     |
| Sma-1-5295 | NS_000200.1    | - | 331420035 | 331419986 |
| Sma-1-5296 | NW_003037890.1 | + | 254570    | 254619    |
| Sma-1-5297 | NS_000200.1    | + | 135937931 | 135937980 |
| Sma-1-5298 | NW_003038079.1 | - | 272649    | 272600    |
| Sma-1-5299 | NS_000200.1    | - | 268402637 | 268402588 |
| Sma-1-5300 | NW_003038034.1 | - | 539735    | 539686    |
| Sma-1-5301 | NW_003038261.1 | - | 193735    | 193686    |
| Sma-1-5302 | NS_000200.1    | - | 323807386 | 323807337 |
| Sma-1-5303 | NS_000200.1    | - | 247481491 | 247481442 |
| Sma-1-5304 | NW_003039129.1 | + | 17385     | 17434     |
| Sma-1-5305 | NW_003026587.1 | + | 29218     | 29267     |
| Sma-1-5306 | NW_003026587.1 | - | 32335     | 32286     |
| Sma-1-5307 | NW_003026456.1 | + | 361455    | 361504    |
| Sma-1-5308 | NW_003037798.1 | + | 1312961   | 1313010   |
| Sma-1-5309 | NW_003037807.1 | + | 420441    | 420490    |
| Sma-1-5310 | NW_003037812.1 | - | 791496    | 791447    |

|            |                |   |           |           |
|------------|----------------|---|-----------|-----------|
| Sma-1-5311 | NW_003037812.1 | - | 791102    | 791053    |
| Sma-1-5312 | NW_003037814.1 | - | 2094      | 2045      |
| Sma-1-5313 | NW_003037827.1 | + | 1664783   | 1664832   |
| Sma-1-5314 | NW_003037850.1 | - | 1231171   | 1231122   |
| Sma-1-5315 | NW_003037865.1 | + | 817306    | 817355    |
| Sma-1-5316 | NW_003037880.1 | - | 292911    | 292862    |
| Sma-1-5317 | NW_003037889.1 | - | 950121    | 950072    |
| Sma-1-5318 | NW_003037906.1 | + | 26992     | 27041     |
| Sma-1-5319 | NW_003037994.1 | + | 567815    | 567864    |
| Sma-1-5320 | NW_003037997.1 | - | 56827     | 56778     |
| Sma-1-5321 | NW_003039127.1 | + | 1931579   | 1931628   |
| Sma-1-5322 | NW_003038086.1 | + | 330138    | 330187    |
| Sma-1-5323 | NW_003038141.1 | - | 249710    | 249661    |
| Sma-1-5324 | NW_003038152.1 | + | 322589    | 322638    |
| Sma-1-5325 | NW_003038187.1 | + | 103117    | 103166    |
| Sma-1-5326 | NS_000200.1    | + | 15572119  | 15572168  |
| Sma-1-5327 | NS_000200.1    | + | 30681957  | 30682006  |
| Sma-1-5328 | NS_000200.1    | + | 58284591  | 58284640  |
| Sma-1-5329 | NS_000200.1    | + | 64286924  | 64286973  |
| Sma-1-5330 | NS_000200.1    | + | 111239225 | 111239274 |
| Sma-1-5331 | NS_000200.1    | + | 115009078 | 115009127 |
| Sma-1-5332 | NS_000200.1    | + | 150334771 | 150334820 |
| Sma-1-5333 | NS_000200.1    | + | 219099629 | 219099678 |
| Sma-1-5334 | NS_000200.1    | + | 228972193 | 228972242 |
| Sma-1-5335 | NS_000200.1    | + | 272578731 | 272578780 |
| Sma-1-5336 | NS_000200.1    | + | 292928313 | 292928362 |
| Sma-1-5337 | NS_000200.1    | + | 302054975 | 302055024 |
| Sma-1-5338 | NS_000200.1    | + | 303842109 | 303842158 |
| Sma-1-5339 | NS_000200.1    | - | 303845226 | 303845177 |
| Sma-1-5340 | NS_000200.1    | - | 287139689 | 287139640 |
| Sma-1-5341 | NS_000200.1    | - | 220868269 | 220868220 |
| Sma-1-5342 | NS_000200.1    | - | 134726611 | 134726562 |
| Sma-1-5343 | NS_000200.1    | - | 123976469 | 123976420 |
| Sma-1-5344 | NS_000200.1    | - | 93217201  | 93217152  |
| Sma-1-5345 | NS_000200.1    | - | 42985954  | 42985905  |
| Sma-1-5346 | NS_000200.1    | - | 40274235  | 40274186  |
| Sma-1-5347 | NS_000200.1    | - | 40273841  | 40273792  |
| Sma-1-5348 | NW_003037927.1 | + | 70827     | 70876     |
| Sma-1-5349 | NS_000200.1    | + | 174048190 | 174048239 |
| Sma-1-5350 | NW_003037851.1 | + | 891156    | 891205    |
| Sma-1-5351 | NS_000200.1    | + | 94294466  | 94294515  |
| Sma-1-5352 | NW_003026618.1 | - | 232842    | 232793    |
| Sma-1-5353 | NS_000200.1    | - | 321987844 | 321987795 |
| Sma-1-5354 | NW_003038161.1 | - | 473417    | 473368    |
| Sma-1-5355 | NS_000200.1    | - | 297843268 | 297843219 |
| Sma-1-5356 | NW_003037916.1 | - | 870688    | 870639    |
| Sma-1-5357 | NW_003037978.1 | + | 539858    | 539907    |
| Sma-1-5358 | NS_000200.1    | + | 209807868 | 209807917 |
| Sma-1-5359 | NS_000200.1    | - | 164064099 | 164064050 |
| Sma-1-5360 | NW_003026610.1 | + | 5367      | 5416      |
| Sma-1-5361 | NW_003027748.1 | + | 1385      | 1434      |
| Sma-1-5362 | NW_003037873.1 | + | 317579    | 317628    |

|            |                |   |           |           |
|------------|----------------|---|-----------|-----------|
| Sma-1-5363 | NW_003038502.1 | - | 184699    | 184650    |
| Sma-1-5364 | NW_003038502.1 | - | 178141    | 178092    |
| Sma-1-5365 | NW_003037842.1 | + | 82810     | 82859     |
| Sma-1-5366 | NW_003037887.1 | - | 1476832   | 1476783   |
| Sma-1-5367 | NW_003038019.1 | + | 412647    | 412696    |
| Sma-1-5368 | NW_003026510.1 | + | 85234     | 85283     |
| Sma-1-5369 | NS_000200.1    | + | 85182000  | 85182049  |
| Sma-1-5370 | NS_000200.1    | + | 119056707 | 119056756 |
| Sma-1-5371 | NS_000200.1    | + | 233729465 | 233729514 |
| Sma-1-5372 | NS_000200.1    | + | 283525415 | 283525464 |
| Sma-1-5373 | NS_000200.1    | + | 310160737 | 310160786 |
| Sma-1-5374 | NS_000200.1    | + | 365874831 | 365874880 |
| Sma-1-5375 | NS_000200.1    | - | 335183744 | 335183695 |
| Sma-1-5376 | NS_000200.1    | - | 335177186 | 335177137 |
| Sma-1-5377 | NS_000200.1    | - | 131940810 | 131940761 |
| Sma-1-5378 | NW_003039127.1 | - | 863989    | 863940    |
| Sma-1-5379 | NS_000200.1    | - | 113941488 | 113941439 |
| Sma-1-5380 | NW_003038118.1 | - | 5907      | 5858      |
| Sma-1-5381 | NS_000200.1    | - | 277570034 | 277569985 |
| Sma-1-5382 | NW_003020838.1 | + | 122       | 171       |
| Sma-1-5383 | NW_003022582.1 | - | 1539      | 1490      |
| Sma-1-5384 | NW_003024594.1 | - | 1622      | 1573      |
| Sma-1-5385 | NW_003037822.1 | + | 1267535   | 1267584   |
| Sma-1-5386 | NW_003037822.1 | - | 1264034   | 1263985   |
| Sma-1-5387 | NW_003037943.1 | - | 733436    | 733387    |
| Sma-1-5388 | NW_003038243.1 | + | 96011     | 96060     |
| Sma-1-5389 | NS_000200.1    | + | 55575541  | 55575590  |
| Sma-1-5390 | NS_000200.1    | + | 315034495 | 315034544 |
| Sma-1-5391 | NS_000200.1    | + | 364546126 | 364546175 |
| Sma-1-5392 | NS_000200.1    | - | 365225992 | 365225943 |
| Sma-1-5393 | NS_000200.1    | - | 348912918 | 348912869 |
| Sma-1-5394 | NS_000200.1    | - | 187754969 | 187754920 |
| Sma-1-5395 | NS_000200.1    | - | 55572040  | 55571991  |
| Sma-1-5396 | NW_003039129.1 | + | 392675    | 392724    |
| Sma-1-5397 | NS_000200.1    | + | 229347483 | 229347532 |
| Sma-1-5398 | NW_003027605.1 | + | 245       | 294       |
| Sma-1-5399 | NW_003026470.1 | + | 493185    | 493234    |
| Sma-1-5400 | NW_003037821.1 | - | 596573    | 596524    |
| Sma-1-5401 | NW_003037830.1 | + | 157042    | 157091    |
| Sma-1-5402 | NW_003037852.1 | + | 923632    | 923681    |
| Sma-1-5403 | NW_003037865.1 | + | 564830    | 564879    |
| Sma-1-5404 | NW_003037918.1 | - | 836110    | 836061    |
| Sma-1-5405 | NW_003037946.1 | + | 898258    | 898307    |
| Sma-1-5406 | NW_003037996.1 | - | 485745    | 485696    |
| Sma-1-5407 | NW_003038255.1 | - | 244416    | 244367    |
| Sma-1-5408 | NW_003038418.1 | + | 1037      | 1086      |
| Sma-1-5409 | NS_000200.1    | + | 68047413  | 68047462  |
| Sma-1-5410 | NS_000200.1    | + | 95315527  | 95315576  |
| Sma-1-5411 | NS_000200.1    | + | 110986749 | 110986798 |
| Sma-1-5412 | NS_000200.1    | + | 191592118 | 191592167 |
| Sma-1-5413 | NS_000200.1    | + | 219617154 | 219617203 |
| Sma-1-5414 | NS_000200.1    | + | 328865556 | 328865605 |

|            |                |   |           |           |
|------------|----------------|---|-----------|-----------|
| Sma-1-5415 | NS_000200.1    | + | 361717485 | 361717534 |
| Sma-1-5416 | NS_000200.1    | - | 320633561 | 320633512 |
| Sma-1-5417 | NS_000200.1    | - | 220730621 | 220730572 |
| Sma-1-5418 | NS_000200.1    | - | 167403100 | 167403051 |
| Sma-1-5419 | NS_000200.1    | - | 53741057  | 53741008  |
| Sma-1-5420 | NW_003037979.1 | - | 27921     | 27872     |
| Sma-1-5421 | NS_000200.1    | - | 210088941 | 210088892 |
| Sma-1-5422 | NW_003037799.1 | - | 1529396   | 1529347   |
| Sma-1-5423 | NW_003037820.1 | + | 443320    | 443369    |
| Sma-1-5424 | NS_000200.1    | + | 52716302  | 52716351  |
| Sma-1-5425 | NS_000200.1    | - | 18519750  | 18519701  |
| Sma-1-5426 | NW_003037824.1 | + | 641603    | 641652    |
| Sma-1-5427 | NS_000200.1    | + | 57572543  | 57572592  |
| Sma-1-5428 | NW_003038133.1 | + | 50601     | 50650     |
| Sma-1-5429 | NS_000200.1    | + | 282922783 | 282922832 |
| Sma-1-5430 | NW_003038252.1 | - | 36073     | 36024     |
| Sma-1-5431 | NS_000200.1    | - | 318891661 | 318891612 |
| Sma-1-5432 | NW_003038156.1 | + | 471448    | 471497    |
| Sma-1-5433 | NS_000200.1    | + | 295203561 | 295203610 |
| Sma-1-5434 | NW_003020433.1 | + | 15        | 64        |
| Sma-1-5435 | NW_003038507.1 | - | 40472     | 40423     |
| Sma-1-5436 | NS_000200.1    | + | 355095622 | 355095671 |
| Sma-1-5437 | NS_000200.1    | - | 336709366 | 336709317 |
| Sma-1-5438 | NW_003026609.1 | + | 192756    | 192805    |
| Sma-1-5439 | NW_003037940.1 | - | 327297    | 327248    |
| Sma-1-5440 | NS_000200.1    | + | 309847748 | 309847797 |
| Sma-1-5441 | NS_000200.1    | - | 184069427 | 184069378 |
| Sma-1-5442 | NW_003037824.1 | - | 29031     | 28982     |
| Sma-1-5443 | NS_000200.1    | - | 56959971  | 56959922  |
| Sma-1-5444 | NW_003037821.1 | + | 160517    | 160566    |
| Sma-1-5445 | NW_003038071.1 | - | 164645    | 164596    |
| Sma-1-5446 | NS_000200.1    | + | 53305001  | 53305050  |
| Sma-1-5447 | NS_000200.1    | - | 264967688 | 264967639 |
| Sma-1-5448 | NW_003037822.1 | + | 1297221   | 1297270   |
| Sma-1-5449 | NS_000200.1    | + | 55605227  | 55605276  |
| Sma-1-5450 | NW_003037822.1 | - | 563151    | 563102    |
| Sma-1-5451 | NW_003037859.1 | + | 247124    | 247173    |
| Sma-1-5452 | NW_003038025.1 | + | 80921     | 80970     |
| Sma-1-5453 | NS_000200.1    | + | 102925965 | 102926014 |
| Sma-1-5454 | NS_000200.1    | + | 238939166 | 238939215 |
| Sma-1-5455 | NS_000200.1    | - | 54871157  | 54871108  |
| Sma-1-5456 | NW_003037822.1 | + | 432921    | 432970    |
| Sma-1-5457 | NS_000200.1    | + | 54740927  | 54740976  |
| Sma-1-5458 | NW_003037814.1 | - | 1679501   | 1679452   |
| Sma-1-5459 | NS_000200.1    | - | 44663361  | 44663312  |
| Sma-1-5460 | NW_003038514.1 | - | 92755     | 92706     |
| Sma-1-5461 | NS_000200.1    | - | 339717294 | 339717245 |
| Sma-1-5462 | NW_003037819.1 | - | 720465    | 720416    |
| Sma-1-5463 | NW_003038038.1 | + | 1004342   | 1004391   |
| Sma-1-5464 | NW_003038072.1 | - | 80120     | 80071     |
| Sma-1-5465 | NS_000200.1    | + | 252907735 | 252907784 |
| Sma-1-5466 | NS_000200.1    | - | 265242348 | 265242299 |

|            |                |   |           |           |
|------------|----------------|---|-----------|-----------|
| Sma-1-5467 | NS_000200.1    | - | 51808730  | 51808681  |
| Sma-1-5468 | NW_003038049.1 | + | 204286    | 204335    |
| Sma-1-5469 | NS_000200.1    | + | 256179813 | 256179862 |
| Sma-1-5470 | NW_003037793.1 | - | 1567003   | 1566954   |
| Sma-1-5471 | NS_000200.1    | - | 1567003   | 1566954   |
| Sma-1-5472 | NW_003037793.1 | - | 388546    | 388497    |
| Sma-1-5473 | NS_000200.1    | - | 388546    | 388497    |
| Sma-1-5474 | NW_003037790.1 | - | 61768     | 61719     |
| Sma-1-5475 | NW_003037840.1 | - | 1749246   | 1749197   |
| Sma-1-5476 | NS_000200.1    | - | 381405940 | 381405891 |
| Sma-1-5477 | NS_000200.1    | - | 82372570  | 82372521  |
| Sma-1-5478 | NW_003037981.1 | - | 1054091   | 1054042   |
| Sma-1-5479 | NS_000200.1    | - | 213451959 | 213451910 |
| Sma-1-5480 | NW_003037907.1 | + | 64908     | 64957     |
| Sma-1-5481 | NS_000200.1    | + | 151469397 | 151469446 |
| Sma-1-5482 | NW_003026617.1 | - | 104457    | 104408    |
| Sma-1-5483 | NS_000200.1    | - | 319675316 | 319675267 |
| Sma-1-5484 | NW_003037824.1 | + | 612200    | 612249    |
| Sma-1-5485 | NS_000200.1    | + | 57543140  | 57543189  |
| Sma-1-5486 | NW_003037822.1 | - | 1195985   | 1195936   |
| Sma-1-5487 | NS_000200.1    | - | 55503991  | 55503942  |
| Sma-1-5488 | NW_003039127.1 | - | 257753    | 257704    |
| Sma-1-5489 | NS_000200.1    | - | 113335252 | 113335203 |
| Sma-1-5490 | NW_003037937.1 | - | 210193    | 210144    |
| Sma-1-5491 | NW_003038117.1 | - | 88100     | 88051     |
| Sma-1-5492 | NS_000200.1    | - | 277405925 | 277405876 |
| Sma-1-5493 | NS_000200.1    | - | 181410102 | 181410053 |
| Sma-1-5494 | NW_003037914.1 | + | 468760    | 468809    |
| Sma-1-5495 | NS_000200.1    | + | 160613010 | 160613059 |
| Sma-1-5496 | NW_003037916.1 | + | 1295281   | 1295330   |
| Sma-1-5497 | NS_000200.1    | + | 164488692 | 164488741 |
| Sma-1-5498 | NW_003037821.1 | - | 1037524   | 1037475   |
| Sma-1-5499 | NS_000200.1    | - | 54182008  | 54181959  |
| Sma-1-5500 | NW_003037916.1 | - | 1310814   | 1310765   |
| Sma-1-5501 | NS_000200.1    | - | 164504225 | 164504176 |
| Sma-1-5502 | NW_003037809.1 | + | 1252661   | 1252710   |
| Sma-1-5503 | NS_000200.1    | + | 34917125  | 34917174  |
| Sma-1-5504 | NW_003037917.1 | - | 1428714   | 1428665   |
| Sma-1-5505 | NS_000200.1    | - | 166465518 | 166465469 |
| Sma-1-5506 | NW_003026466.1 | + | 68045     | 68094     |
| Sma-1-5507 | NS_000200.1    | + | 215335152 | 215335201 |
| Sma-1-5508 | NW_003026596.1 | - | 183504    | 183455    |
| Sma-1-5509 | NS_000200.1    | - | 305454132 | 305454083 |
| Sma-1-5510 | NW_003038146.1 | - | 434026    | 433977    |
| Sma-1-5511 | NS_000200.1    | - | 289414696 | 289414647 |
| Sma-1-5512 | NW_003037830.1 | + | 692312    | 692361    |
| Sma-1-5513 | NS_000200.1    | + | 68582683  | 68582732  |
| Sma-1-5514 | NW_003026602.1 | + | 20689     | 20738     |
| Sma-1-5515 | NS_000200.1    | + | 306940672 | 306940721 |
| Sma-1-5516 | NW_003037796.1 | - | 402905    | 402856    |
| Sma-1-5517 | NS_000200.1    | - | 8612549   | 8612500   |
| Sma-1-5518 | NW_003038131.1 | - | 16688     | 16639     |



|            |                |   |           |           |
|------------|----------------|---|-----------|-----------|
| Sma-1-5519 | NS_000200.1    | - | 281978532 | 281978483 |
| Sma-1-5520 | NW_003037912.1 | + | 1511453   | 1511502   |
| Sma-1-5521 | NS_000200.1    | + | 158323028 | 158323077 |
| Sma-1-5522 | NW_003037950.1 | - | 104996    | 104947    |
| Sma-1-5523 | NS_000200.1    | - | 192504104 | 192504055 |
| Sma-1-5524 | NW_003035873.1 | + | 14193     | 14242     |
| Sma-1-5525 | NW_003037918.1 | + | 2232364   | 2232413   |
| Sma-1-5526 | NS_000200.1    | + | 168799354 | 168799403 |
| Sma-1-5527 | NS_000200.1    | + | 335775195 | 335775244 |
| Sma-1-5528 | NW_003037794.1 | + | 83488     | 83537     |
| Sma-1-5529 | NS_000200.1    | + | 4263083   | 4263132   |
| Sma-1-5530 | NW_003037917.1 | - | 714097    | 714048    |
| Sma-1-5531 | NS_000200.1    | - | 165750901 | 165750852 |
| Sma-1-5532 | NW_003037805.1 | - | 1075366   | 1075317   |
| Sma-1-5533 | NS_000200.1    | - | 27633210  | 27633161  |
| Sma-1-5534 | NW_003037804.1 | + | 2718      | 2767      |
| Sma-1-5535 | NS_000200.1    | + | 25142738  | 25142787  |
| Sma-1-5536 | NW_003037803.1 | - | 902026    | 901977    |
| Sma-1-5537 | NS_000200.1    | - | 24402563  | 24402514  |
| Sma-1-5538 | NW_003037918.1 | - | 60519     | 60470     |
| Sma-1-5539 | NS_000200.1    | - | 166627509 | 166627460 |
| Sma-1-5540 | NW_003038832.1 | + | 2088      | 2137      |
| Sma-1-5541 | NS_000200.1    | + | 352368432 | 352368481 |
| Sma-1-5542 | NW_003037775.1 | - | 3442      | 3393      |
| Sma-1-5543 | NW_003038155.1 | - | 525447    | 525398    |
| Sma-1-5544 | NS_000200.1    | - | 378632608 | 378632559 |
| Sma-1-5545 | NS_000200.1    | - | 294648565 | 294648516 |
| Sma-1-5546 | NW_003037924.1 | - | 251253    | 251204    |
| Sma-1-5547 | NS_000200.1    | - | 171958211 | 171958162 |
| Sma-1-5548 | NW_003037800.1 | - | 132532    | 132483    |
| Sma-1-5549 | NS_000200.1    | - | 18761892  | 18761843  |
| Sma-1-5550 | NW_003037968.1 | + | 456090    | 456139    |
| Sma-1-5551 | NS_000200.1    | + | 200373260 | 200373309 |
| Sma-1-5552 | NW_003037484.1 | + | 1019      | 1068      |
| Sma-1-5553 | NS_000200.1    | + | 370138194 | 370138243 |
| Sma-1-5554 | NW_003037926.1 | + | 301623    | 301672    |
| Sma-1-5555 | NS_000200.1    | + | 173469893 | 173469942 |
| Sma-1-5556 | NW_003037936.1 | - | 407153    | 407104    |
| Sma-1-5557 | NS_000200.1    | - | 180846882 | 180846833 |
| Sma-1-5558 | NW_003038036.1 | + | 691138    | 691187    |
| Sma-1-5559 | NS_000200.1    | + | 249624990 | 249625039 |
| Sma-1-5560 | NW_003037943.1 | + | 1140833   | 1140882   |
| Sma-1-5561 | NS_000200.1    | + | 188162366 | 188162415 |
| Sma-1-5562 | NW_003037797.1 | + | 593105    | 593154    |
| Sma-1-5563 | NS_000200.1    | + | 11020965  | 11021014  |
| Sma-1-5564 | NW_003037795.1 | + | 1004      | 1053      |
| Sma-1-5565 | NS_000200.1    | + | 6391887   | 6391936   |
| Sma-1-5566 | NW_003037794.1 | + | 889727    | 889776    |
| Sma-1-5567 | NS_000200.1    | + | 5069322   | 5069371   |
| Sma-1-5568 | NW_003037937.1 | - | 402777    | 402728    |
| Sma-1-5569 | NW_003026516.1 | - | 373945    | 373896    |
| Sma-1-5570 | NS_000200.1    | - | 299482242 | 299482193 |

|            |                |   |           |           |
|------------|----------------|---|-----------|-----------|
| Sma-1-5571 | NS_000200.1    | - | 181602686 | 181602637 |
| Sma-1-5572 | NW_003035880.1 | + | 323784    | 323833    |
| Sma-1-5573 | NS_000200.1    | + | 339564848 | 339564897 |
| Sma-1-5574 | NW_003037982.1 | - | 1176069   | 1176020   |
| Sma-1-5575 | NS_000200.1    | - | 214835264 | 214835215 |
| Sma-1-5576 | NW_003037995.1 | - | 365979    | 365930    |
| Sma-1-5577 | NS_000200.1    | - | 220055747 | 220055698 |
| Sma-1-5578 | NW_003037996.1 | - | 164079    | 164030    |
| Sma-1-5579 | NS_000200.1    | - | 220408955 | 220408906 |
| Sma-1-5580 | NW_003024939.1 | - | 693       | 644       |
| Sma-1-5581 | NW_003037809.1 | - | 1826255   | 1826206   |
| Sma-1-5582 | NW_003037848.1 | - | 400879    | 400830    |
| Sma-1-5583 | NW_003037905.1 | + | 665182    | 665231    |
| Sma-1-5584 | NS_000200.1    | + | 149934194 | 149934243 |
| Sma-1-5585 | NS_000200.1    | - | 355746057 | 355746008 |
| Sma-1-5586 | NS_000200.1    | - | 90093950  | 90093901  |
| Sma-1-5587 | NS_000200.1    | - | 35490719  | 35490670  |
| Sma-1-5588 | NW_003038033.1 | + | 643162    | 643211    |
| Sma-1-5589 | NS_000200.1    | + | 246623164 | 246623213 |
| Sma-1-5590 | NW_003037795.1 | + | 1731579   | 1731628   |
| Sma-1-5591 | NS_000200.1    | + | 8122462   | 8122511   |
| Sma-1-5592 | NW_003038033.1 | - | 644870    | 644821    |
| Sma-1-5593 | NS_000200.1    | - | 246624872 | 246624823 |
| Sma-1-5594 | NW_003037798.1 | - | 2326789   | 2326740   |
| Sma-1-5595 | NW_003037831.1 | + | 369159    | 369208    |
| Sma-1-5596 | NW_003037863.1 | + | 1320127   | 1320176   |
| Sma-1-5597 | NW_003038027.1 | - | 639431    | 639382    |
| Sma-1-5598 | NW_003038037.1 | - | 1653230   | 1653181   |
| Sma-1-5599 | NS_000200.1    | + | 69818461  | 69818510  |
| Sma-1-5600 | NS_000200.1    | + | 108078494 | 108078543 |
| Sma-1-5601 | NS_000200.1    | - | 251808639 | 251808590 |
| Sma-1-5602 | NS_000200.1    | - | 241010145 | 241010096 |
| Sma-1-5603 | NS_000200.1    | - | 16585947  | 16585898  |
| Sma-1-5604 | NW_003038002.1 | + | 237681    | 237730    |
| Sma-1-5605 | NS_000200.1    | + | 223357890 | 223357939 |
| Sma-1-5606 | NW_003032998.1 | + | 1156      | 1205      |
| Sma-1-5607 | NW_003037795.1 | + | 1032411   | 1032460   |
| Sma-1-5608 | NW_003037958.1 | + | 151620    | 151669    |
| Sma-1-5609 | NS_000200.1    | + | 7423294   | 7423343   |
| Sma-1-5610 | NS_000200.1    | + | 194815804 | 194815853 |
| Sma-1-5611 | NS_000200.1    | + | 326149261 | 326149310 |
| Sma-1-5612 | NW_003038509.1 | + | 322562    | 322611    |
| Sma-1-5613 | NS_000200.1    | + | 337955014 | 337955063 |
| Sma-1-5614 | NW_003038132.1 | + | 343625    | 343674    |
| Sma-1-5615 | NS_000200.1    | + | 282764095 | 282764144 |
| Sma-1-5616 | NW_003038037.1 | - | 1383033   | 1382984   |
| Sma-1-5617 | NS_000200.1    | - | 251538442 | 251538393 |
| Sma-1-5618 | NW_003027365.1 | - | 997       | 948       |
| Sma-1-5619 | NS_000200.1    | - | 356736493 | 356736444 |
| Sma-1-5620 | NW_003038035.1 | - | 182489    | 182440    |
| Sma-1-5621 | NS_000200.1    | - | 248043981 | 248043932 |
| Sma-1-5622 | NW_003029804.1 | + | 17357     | 17406     |

|            |                |   |           |           |
|------------|----------------|---|-----------|-----------|
| Sma-1-5623 | NW_003033027.1 | + | 4260      | 4309      |
| Sma-1-5624 | NW_003038212.1 | + | 2328      | 2377      |
| Sma-1-5625 | NW_003037898.1 | - | 422859    | 422810    |
| Sma-1-5626 | NW_003026468.1 | - | 131536    | 131487    |
| Sma-1-5627 | NW_003037797.1 | + | 1028264   | 1028313   |
| Sma-1-5628 | NW_003037805.1 | - | 1182776   | 1182727   |
| Sma-1-5629 | NW_003037805.1 | - | 970601    | 970552    |
| Sma-1-5630 | NW_003037810.1 | + | 1273339   | 1273388   |
| Sma-1-5631 | NW_003037814.1 | + | 92444     | 92493     |
| Sma-1-5632 | NW_003037814.1 | + | 94667     | 94716     |
| Sma-1-5633 | NW_003037822.1 | + | 373956    | 374005    |
| Sma-1-5634 | NW_003037836.1 | - | 564533    | 564484    |
| Sma-1-5635 | NW_003037846.1 | - | 273266    | 273217    |
| Sma-1-5636 | NW_003037862.1 | - | 92435     | 92386     |
| Sma-1-5637 | NW_003037883.1 | + | 373460    | 373509    |
| Sma-1-5638 | NW_003038023.1 | + | 42624     | 42673     |
| Sma-1-5639 | NW_003026490.1 | + | 209219    | 209268    |
| Sma-1-5640 | NS_000200.1    | + | 11456124  | 11456173  |
| Sma-1-5641 | NS_000200.1    | + | 37877861  | 37877910  |
| Sma-1-5642 | NS_000200.1    | + | 43076304  | 43076353  |
| Sma-1-5643 | NS_000200.1    | + | 43078527  | 43078576  |
| Sma-1-5644 | NS_000200.1    | + | 54681962  | 54682011  |
| Sma-1-5645 | NS_000200.1    | + | 126437183 | 126437232 |
| Sma-1-5646 | NS_000200.1    | + | 237202915 | 237202964 |
| Sma-1-5647 | NS_000200.1    | + | 267840935 | 267840984 |
| Sma-1-5648 | NS_000200.1    | + | 306166219 | 306166268 |
| Sma-1-5649 | NS_000200.1    | + | 326219080 | 326219129 |
| Sma-1-5650 | NS_000200.1    | + | 375893963 | 375894012 |
| Sma-1-5651 | NS_000200.1    | - | 216325557 | 216325508 |
| Sma-1-5652 | NS_000200.1    | - | 144406681 | 144406632 |
| Sma-1-5653 | NS_000200.1    | - | 105744096 | 105744047 |
| Sma-1-5654 | NS_000200.1    | - | 87907836  | 87907787  |
| Sma-1-5655 | NS_000200.1    | - | 76121632  | 76121583  |
| Sma-1-5656 | NS_000200.1    | - | 27740620  | 27740571  |
| Sma-1-5657 | NS_000200.1    | - | 27528445  | 27528396  |
| Sma-1-5658 | NW_003021621.1 | - | 55        | 6         |
| Sma-1-5659 | NW_003037838.1 | - | 444443    | 444394    |
| Sma-1-5660 | NS_000200.1    | - | 348183556 | 348183507 |
| Sma-1-5661 | NS_000200.1    | - | 78443006  | 78442957  |
| Sma-1-5662 | NW_003033333.1 | - | 1087      | 1038      |
| Sma-1-5663 | NW_003038136.1 | + | 59438     | 59487     |
| Sma-1-5664 | NS_000200.1    | + | 284181507 | 284181556 |
| Sma-1-5665 | NS_000200.1    | - | 347999435 | 347999386 |
| Sma-1-5666 | NW_003037796.1 | + | 279159    | 279208    |
| Sma-1-5667 | NS_000200.1    | + | 8488803   | 8488852   |
| Sma-1-5668 | NW_003037962.1 | - | 298621    | 298572    |
| Sma-1-5669 | NS_000200.1    | - | 196375464 | 196375415 |
| Sma-1-5670 | NW_003037982.1 | - | 282946    | 282897    |
| Sma-1-5671 | NS_000200.1    | - | 213942141 | 213942092 |
| Sma-1-5672 | NW_003026485.1 | + | 121296    | 121345    |
| Sma-1-5673 | NW_003026485.1 | + | 142073    | 142122    |
| Sma-1-5674 | NS_000200.1    | + | 258476201 | 258476250 |

|            |                |   |           |           |
|------------|----------------|---|-----------|-----------|
| Sma-1-5675 | NS_000200.1    | + | 258496978 | 258497027 |
| Sma-1-5676 | NW_003026604.1 | + | 110089    | 110138    |
| Sma-1-5677 | NS_000200.1    | + | 307355646 | 307355695 |
| Sma-1-5678 | NW_003037979.1 | + | 352589    | 352638    |
| Sma-1-5679 | NS_000200.1    | + | 210413609 | 210413658 |
| Sma-1-5680 | NW_003038028.1 | + | 82306     | 82355     |
| Sma-1-5681 | NS_000200.1    | + | 241389880 | 241389929 |
| Sma-1-5682 | NW_003038033.1 | + | 205578    | 205627    |
| Sma-1-5683 | NS_000200.1    | + | 246185580 | 246185629 |
| Sma-1-5684 | NW_003037914.1 | - | 1710319   | 1710270   |
| Sma-1-5685 | NS_000200.1    | - | 161854569 | 161854520 |
| Sma-1-5686 | NW_003038237.1 | + | 19564     | 19613     |
| Sma-1-5687 | NS_000200.1    | + | 313459483 | 313459532 |
| Sma-1-5688 | NW_003038037.1 | + | 1663193   | 1663242   |
| Sma-1-5689 | NS_000200.1    | + | 251818602 | 251818651 |
| Sma-1-5690 | NW_003024268.1 | - | 138       | 89        |
| Sma-1-5691 | NW_003037170.1 | + | 4325      | 4374      |
| Sma-1-5692 | NW_003026458.1 | + | 311601    | 311650    |
| Sma-1-5693 | NW_003037794.1 | - | 886440    | 886391    |
| Sma-1-5694 | NW_003037797.1 | + | 1382034   | 1382083   |
| Sma-1-5695 | NW_003037797.1 | + | 2507803   | 2507852   |
| Sma-1-5696 | NW_003037800.1 | + | 295289    | 295338    |
| Sma-1-5697 | NW_003037807.1 | - | 111052    | 111003    |
| Sma-1-5698 | NW_003037818.1 | + | 1122122   | 1122171   |
| Sma-1-5699 | NW_003037837.1 | + | 459204    | 459253    |
| Sma-1-5700 | NW_003037838.1 | + | 850420    | 850469    |
| Sma-1-5701 | NW_003037838.1 | - | 303752    | 303703    |
| Sma-1-5702 | NW_003037914.1 | + | 1712418   | 1712467   |
| Sma-1-5703 | NW_003037938.1 | + | 372893    | 372942    |
| Sma-1-5704 | NW_003037938.1 | + | 691643    | 691692    |
| Sma-1-5705 | NW_003037955.1 | + | 98597     | 98646     |
| Sma-1-5706 | NW_003037956.1 | + | 5919      | 5968      |
| Sma-1-5707 | NW_003037964.1 | - | 332610    | 332561    |
| Sma-1-5708 | NW_003037974.1 | + | 235606    | 235655    |
| Sma-1-5709 | NW_003038135.1 | + | 93888     | 93937     |
| Sma-1-5710 | NS_000200.1    | + | 11809894  | 11809943  |
| Sma-1-5711 | NS_000200.1    | + | 12935663  | 12935712  |
| Sma-1-5712 | NS_000200.1    | + | 18924649  | 18924698  |
| Sma-1-5713 | NS_000200.1    | + | 49837529  | 49837578  |
| Sma-1-5714 | NS_000200.1    | + | 77265062  | 77265111  |
| Sma-1-5715 | NS_000200.1    | + | 78848983  | 78849032  |
| Sma-1-5716 | NS_000200.1    | + | 102179831 | 102179880 |
| Sma-1-5717 | NS_000200.1    | + | 161856668 | 161856717 |
| Sma-1-5718 | NS_000200.1    | + | 182410006 | 182410055 |
| Sma-1-5719 | NS_000200.1    | + | 182728756 | 182728805 |
| Sma-1-5720 | NS_000200.1    | + | 193725331 | 193725380 |
| Sma-1-5721 | NS_000200.1    | + | 194062374 | 194062423 |
| Sma-1-5722 | NS_000200.1    | + | 204910912 | 204910961 |
| Sma-1-5723 | NS_000200.1    | + | 283966227 | 283966276 |
| Sma-1-5724 | NS_000200.1    | + | 362451922 | 362451971 |
| Sma-1-5725 | NS_000200.1    | - | 348669642 | 348669593 |
| Sma-1-5726 | NS_000200.1    | - | 197934132 | 197934083 |

|            |                |   |           |           |
|------------|----------------|---|-----------|-----------|
| Sma-1-5727 | NS_000200.1    | - | 78302315  | 78302266  |
| Sma-1-5728 | NS_000200.1    | - | 30372568  | 30372519  |
| Sma-1-5729 | NS_000200.1    | - | 5066035   | 5065986   |
| Sma-1-5730 | NW_003038120.1 | - | 179086    | 179037    |
| Sma-1-5731 | NS_000200.1    | - | 278364309 | 278364260 |
| Sma-1-5732 | NW_003038221.1 | + | 136866    | 136915    |
| Sma-1-5733 | NS_000200.1    | + | 308778130 | 308778179 |
| Sma-1-5734 | NW_003026488.1 | - | 53182     | 53133     |
| Sma-1-5735 | NS_000200.1    | - | 263559676 | 263559627 |
| Sma-1-5736 | NW_003027905.1 | + | 46        | 95        |
| Sma-1-5737 | NS_000200.1    | + | 366129163 | 366129212 |
| Sma-1-5738 | NW_003037938.1 | - | 662613    | 662564    |
| Sma-1-5739 | NS_000200.1    | - | 182699726 | 182699677 |
| Sma-1-5740 | NW_003037839.1 | - | 1358863   | 1358814   |
| Sma-1-5741 | NW_003038060.1 | + | 94056     | 94105     |
| Sma-1-5742 | NW_003038060.1 | - | 93229     | 93180     |
| Sma-1-5743 | NW_003038076.1 | - | 272122    | 272073    |
| Sma-1-5744 | NS_000200.1    | + | 260659181 | 260659230 |
| Sma-1-5745 | NS_000200.1    | - | 266489296 | 266489247 |
| Sma-1-5746 | NS_000200.1    | - | 260658354 | 260658305 |
| Sma-1-5747 | NS_000200.1    | - | 80317013  | 80316964  |
| Sma-1-5748 | NW_003037800.1 | - | 1309377   | 1309328   |
| Sma-1-5749 | NS_000200.1    | - | 19938737  | 19938688  |
| Sma-1-5750 | NW_003037881.1 | - | 677105    | 677056    |
| Sma-1-5751 | NW_003037886.1 | + | 832237    | 832286    |
| Sma-1-5752 | NW_003038036.1 | + | 225994    | 226043    |
| Sma-1-5753 | NW_003038084.1 | + | 289542    | 289591    |
| Sma-1-5754 | NS_000200.1    | + | 130087804 | 130087853 |
| Sma-1-5755 | NS_000200.1    | + | 249159846 | 249159895 |
| Sma-1-5756 | NS_000200.1    | + | 271304786 | 271304835 |
| Sma-1-5757 | NS_000200.1    | - | 125108896 | 125108847 |
| Sma-1-5758 | NW_003038512.1 | - | 262012    | 261963    |
| Sma-1-5759 | NS_000200.1    | - | 338818709 | 338818660 |
| Sma-1-5760 | NW_003027354.1 | + | 353       | 402       |
| Sma-1-5761 | NW_003038258.1 | - | 243905    | 243856    |
| Sma-1-5762 | NW_003037904.1 | - | 547389    | 547340    |
| Sma-1-5763 | NW_003037969.1 | - | 364524    | 364475    |
| Sma-1-5764 | NS_000200.1    | + | 356717306 | 356717355 |
| Sma-1-5765 | NS_000200.1    | - | 322782415 | 322782366 |
| Sma-1-5766 | NS_000200.1    | - | 200970651 | 200970602 |
| Sma-1-5767 | NS_000200.1    | - | 149261888 | 149261839 |
| Sma-1-5768 | NW_003037799.1 | - | 1542994   | 1542945   |
| Sma-1-5769 | NS_000200.1    | - | 18533348  | 18533299  |
| Sma-1-5770 | NW_003035578.1 | - | 2657      | 2608      |
| Sma-1-5771 | NW_003038005.1 | + | 149743    | 149792    |
| Sma-1-5772 | NS_000200.1    | + | 224555697 | 224555746 |
| Sma-1-5773 | NS_000200.1    | - | 329027988 | 329027939 |
| Sma-1-5774 | NW_003037793.1 | - | 2802570   | 2802521   |
| Sma-1-5775 | NS_000200.1    | - | 2802570   | 2802521   |
| Sma-1-5776 | NW_003037797.1 | - | 1011217   | 1011168   |
| Sma-1-5777 | NS_000200.1    | - | 11439077  | 11439028  |
| Sma-1-5778 | NW_003038163.1 | + | 251269    | 251318    |

|            |                |   |           |           |
|------------|----------------|---|-----------|-----------|
| Sma-1-5779 | NS.000200.1    | + | 298651549 | 298651598 |
| Sma-1-5780 | NW_003026619.1 | + | 64844     | 64893     |
| Sma-1-5781 | NW_003037862.1 | - | 45468     | 45419     |
| Sma-1-5782 | NS.000200.1    | + | 322255588 | 322255637 |
| Sma-1-5783 | NS.000200.1    | - | 105697129 | 105697080 |
| Sma-1-5784 | NW_003037931.1 | + | 597660    | 597709    |
| Sma-1-5785 | NS.000200.1    | + | 177430327 | 177430376 |
| Sma-1-5786 | NW_003037933.1 | + | 267989    | 268038    |
| Sma-1-5787 | NS.000200.1    | + | 178681161 | 178681210 |
| Sma-1-5788 | NW_003037795.1 | - | 1557173   | 1557124   |
| Sma-1-5789 | NS.000200.1    | - | 7948056   | 7948007   |
| Sma-1-5790 | NW_003037936.1 | + | 378087    | 378136    |
| Sma-1-5791 | NS.000200.1    | + | 180817816 | 180817865 |
| Sma-1-5792 | NW_003037793.1 | - | 3321378   | 3321329   |
| Sma-1-5793 | NS.000200.1    | - | 3321378   | 3321329   |
| Sma-1-5794 | NW_003035589.1 | + | 8532      | 8581      |
| Sma-1-5795 | NS.000200.1    | + | 329258005 | 329258054 |
| Sma-1-5796 | NW_003037808.1 | + | 250718    | 250767    |
| Sma-1-5797 | NW_003037881.1 | + | 454022    | 454071    |
| Sma-1-5798 | NS.000200.1    | + | 32037355  | 32037404  |
| Sma-1-5799 | NS.000200.1    | + | 124885813 | 124885862 |
| Sma-1-5800 | NW_003037791.1 | + | 400187    | 400236    |
| Sma-1-5801 | NW_003037797.1 | - | 960810    | 960761    |
| Sma-1-5802 | NS.000200.1    | + | 382105615 | 382105664 |
| Sma-1-5803 | NS.000200.1    | - | 11388670  | 11388621  |
| Sma-1-5804 | NW_003037940.1 | + | 563393    | 563442    |
| Sma-1-5805 | NS.000200.1    | + | 184305523 | 184305572 |
| Sma-1-5806 | NW_003037944.1 | + | 298039    | 298088    |
| Sma-1-5807 | NS.000200.1    | + | 188519392 | 188519441 |
| Sma-1-5808 | NW_003037974.1 | - | 639645    | 639596    |
| Sma-1-5809 | NW_003038240.1 | + | 56005     | 56054     |
| Sma-1-5810 | NS.000200.1    | + | 314194936 | 314194985 |
| Sma-1-5811 | NS.000200.1    | - | 205314951 | 205314902 |
| Sma-1-5812 | NW_003026596.1 | + | 179043    | 179092    |
| Sma-1-5813 | NS.000200.1    | + | 305449671 | 305449720 |
| Sma-1-5814 | NW_003026470.1 | + | 322476    | 322525    |
| Sma-1-5815 | NS.000200.1    | + | 219446445 | 219446494 |
| Sma-1-5816 | NW_003038928.1 | - | 837       | 788       |
| Sma-1-5817 | NS.000200.1    | - | 355820717 | 355820668 |
| Sma-1-5818 | NW_003020782.1 | - | 185       | 136       |
| Sma-1-5819 | NW_003026462.1 | + | 193838    | 193887    |
| Sma-1-5820 | NS.000200.1    | + | 196861341 | 196861390 |
| Sma-1-5821 | NS.000200.1    | - | 364447332 | 364447283 |
| Sma-1-5822 | NW_003026456.1 | - | 589477    | 589428    |
| Sma-1-5823 | NW_003038025.1 | + | 535419    | 535468    |
| Sma-1-5824 | NS.000200.1    | + | 239393664 | 239393713 |
| Sma-1-5825 | NS.000200.1    | - | 58512613  | 58512564  |
| Sma-1-5826 | NW_003038012.1 | + | 22089     | 22138     |
| Sma-1-5827 | NS.000200.1    | + | 228346028 | 228346077 |
| Sma-1-5828 | NW_003038068.1 | - | 180861    | 180812    |
| Sma-1-5829 | NS.000200.1    | - | 263248069 | 263248020 |
| Sma-1-5830 | NW_003037819.1 | - | 493155    | 493106    |

|            |                |   |           |           |
|------------|----------------|---|-----------|-----------|
| Sma-1-5831 | NS.000200.1    | - | 51581420  | 51581371  |
| Sma-1-5832 | NW_003038006.1 | + | 234439    | 234488    |
| Sma-1-5833 | NS.000200.1    | + | 225118923 | 225118972 |
| Sma-1-5834 | NW_003038016.1 | + | 124373    | 124422    |
| Sma-1-5835 | NS.000200.1    | + | 231240910 | 231240959 |
| Sma-1-5836 | NW_003029805.1 | - | 4670      | 4621      |
| Sma-1-5837 | NW_003038009.1 | + | 148010    | 148059    |
| Sma-1-5838 | NW_003037824.1 | + | 766402    | 766451    |
| Sma-1-5839 | NW_003037855.1 | - | 333696    | 333647    |
| Sma-1-5840 | NW_003037866.1 | + | 626148    | 626197    |
| Sma-1-5841 | NW_003037879.1 | + | 654531    | 654580    |
| Sma-1-5842 | NW_003037974.1 | - | 110247    | 110198    |
| Sma-1-5843 | NW_003038017.1 | - | 281520    | 281471    |
| Sma-1-5844 | NW_003038030.1 | + | 444771    | 444820    |
| Sma-1-5845 | NW_003038033.1 | - | 711833    | 711784    |
| Sma-1-5846 | NW_003038118.1 | - | 45075     | 45026     |
| Sma-1-5847 | NW_003038151.1 | + | 465941    | 465990    |
| Sma-1-5848 | NW_003038160.1 | - | 520851    | 520802    |
| Sma-1-5849 | NS.000200.1    | + | 57697342  | 57697391  |
| Sma-1-5850 | NS.000200.1    | + | 112113947 | 112113996 |
| Sma-1-5851 | NS.000200.1    | + | 123656787 | 123656836 |
| Sma-1-5852 | NS.000200.1    | + | 226522073 | 226522122 |
| Sma-1-5853 | NS.000200.1    | + | 243580638 | 243580687 |
| Sma-1-5854 | NS.000200.1    | + | 292373184 | 292373233 |
| Sma-1-5855 | NS.000200.1    | - | 375910934 | 375910885 |
| Sma-1-5856 | NS.000200.1    | - | 297272782 | 297272733 |
| Sma-1-5857 | NS.000200.1    | - | 277609202 | 277609153 |
| Sma-1-5858 | NS.000200.1    | - | 246691835 | 246691786 |
| Sma-1-5859 | NS.000200.1    | - | 232047551 | 232047502 |
| Sma-1-5860 | NS.000200.1    | - | 204785553 | 204785504 |
| Sma-1-5861 | NS.000200.1    | - | 99198446  | 99198397  |
| Sma-1-5862 | NW_003037943.1 | - | 263173    | 263124    |
| Sma-1-5863 | NS.000200.1    | - | 187284706 | 187284657 |
| Sma-1-5864 | NW_003037813.1 | + | 1223323   | 1223372   |
| Sma-1-5865 | NW_003038042.1 | + | 217233    | 217282    |
| Sma-1-5866 | NS.000200.1    | + | 42210186  | 42210235  |
| Sma-1-5867 | NS.000200.1    | + | 254162832 | 254162881 |
| Sma-1-5868 | NW_003030794.1 | - | 91        | 42        |
| Sma-1-5869 | NS.000200.1    | - | 366923227 | 366923178 |
| Sma-1-5870 | NW_003026471.1 | - | 122215    | 122166    |
| Sma-1-5871 | NS.000200.1    | - | 222234448 | 222234399 |
| Sma-1-5872 | NW_003038151.1 | + | 50555     | 50604     |
| Sma-1-5873 | NS.000200.1    | + | 291957798 | 291957847 |
| Sma-1-5874 | NW_003038242.1 | - | 134692    | 134643    |
| Sma-1-5875 | NS.000200.1    | - | 314833838 | 314833789 |
| Sma-1-5876 | NW_003038509.1 | + | 171969    | 172018    |
| Sma-1-5877 | NS.000200.1    | + | 337804421 | 337804470 |
| Sma-1-5878 | NW_003037824.1 | - | 53523     | 53474     |
| Sma-1-5879 | NS.000200.1    | - | 56984463  | 56984414  |
| Sma-1-5880 | NW_003037961.1 | - | 5820      | 5771      |
| Sma-1-5881 | NS.000200.1    | - | 195630062 | 195630013 |
| Sma-1-5882 | NW_003029591.1 | - | 668       | 619       |

|            |                |   |           |           |
|------------|----------------|---|-----------|-----------|
| Sma-1-5883 | NS_000200.1    | - | 366206010 | 366205961 |
| Sma-1-5884 | NW_003026588.1 | + | 27324     | 27373     |
| Sma-1-5885 | NS_000200.1    | + | 303876467 | 303876516 |
| Sma-1-5886 | NW_003037831.1 | + | 598889    | 598938    |
| Sma-1-5887 | NW_003037838.1 | - | 891474    | 891425    |
| Sma-1-5888 | NS_000200.1    | + | 70048191  | 70048240  |
| Sma-1-5889 | NS_000200.1    | - | 78890037  | 78889988  |
| Sma-1-5890 | NW_003037962.1 | + | 165890    | 165939    |
| Sma-1-5891 | NS_000200.1    | + | 196242733 | 196242782 |
| Sma-1-5892 | NW_003026483.1 | + | 192287    | 192336    |
| Sma-1-5893 | NS_000200.1    | + | 256706811 | 256706860 |
| Sma-1-5894 | NW_003037755.1 | - | 31159     | 31110     |
| Sma-1-5895 | NW_003026465.1 | + | 558650    | 558699    |
| Sma-1-5896 | NW_003037814.1 | - | 1603172   | 1603123   |
| Sma-1-5897 | NW_003037821.1 | + | 1110497   | 1110546   |
| Sma-1-5898 | NW_003037823.1 | - | 250562    | 250513    |
| Sma-1-5899 | NW_003037841.1 | + | 1100036   | 1100085   |
| Sma-1-5900 | NW_003037914.1 | + | 1673378   | 1673427   |
| Sma-1-5901 | NW_003037925.1 | + | 451886    | 451935    |
| Sma-1-5902 | NS_000200.1    | + | 54254981  | 54255030  |
| Sma-1-5903 | NS_000200.1    | + | 83711217  | 83711266  |
| Sma-1-5904 | NS_000200.1    | + | 161817628 | 161817677 |
| Sma-1-5905 | NS_000200.1    | + | 172853889 | 172853938 |
| Sma-1-5906 | NS_000200.1    | + | 207951244 | 207951293 |
| Sma-1-5907 | NS_000200.1    | - | 377437405 | 377437356 |
| Sma-1-5908 | NS_000200.1    | - | 56167181  | 56167132  |
| Sma-1-5909 | NS_000200.1    | - | 44587032  | 44586983  |
| Sma-1-5910 | NW_003029783.1 | - | 2113      | 2064      |
| Sma-1-5911 | NS_000200.1    | - | 375588599 | 375588550 |
| Sma-1-5912 | NW_003026616.1 | + | 144281    | 144330    |
| Sma-1-5913 | NW_003037809.1 | - | 1432620   | 1432571   |
| Sma-1-5914 | NS_000200.1    | + | 317500880 | 317500929 |
| Sma-1-5915 | NS_000200.1    | - | 35097084  | 35097035  |
| Sma-1-5916 | NW_003038258.1 | + | 159790    | 159839    |
| Sma-1-5917 | NS_000200.1    | + | 322698300 | 322698349 |
| Sma-1-5918 | NW_003037798.1 | + | 2398500   | 2398549   |
| Sma-1-5919 | NW_003037830.1 | - | 484800    | 484751    |
| Sma-1-5920 | NW_003037881.1 | - | 638213    | 638164    |
| Sma-1-5921 | NS_000200.1    | + | 16657658  | 16657707  |
| Sma-1-5922 | NS_000200.1    | - | 125070004 | 125069955 |
| Sma-1-5923 | NS_000200.1    | - | 68375171  | 68375122  |
| Sma-1-5924 | NW_003026456.1 | - | 532950    | 532901    |
| Sma-1-5925 | NS_000200.1    | - | 58456086  | 58456037  |
| Sma-1-5926 | NW_003038037.1 | + | 1505776   | 1505825   |
| Sma-1-5927 | NS_000200.1    | + | 251661185 | 251661234 |
| Sma-1-5928 | NW_003038187.1 | + | 137210    | 137259    |
| Sma-1-5929 | NS_000200.1    | + | 302089068 | 302089117 |
| Sma-1-5930 | NW_003038250.1 | - | 131659    | 131610    |
| Sma-1-5931 | NW_003037831.1 | - | 658394    | 658345    |
| Sma-1-5932 | NS_000200.1    | - | 318184336 | 318184287 |
| Sma-1-5933 | NS_000200.1    | - | 70107696  | 70107647  |
| Sma-1-5934 | NW_003028564.1 | - | 126       | 77        |



|            |                |   |           |           |
|------------|----------------|---|-----------|-----------|
| Sma-1-5935 | NW_003026619.1 | - | 306112    | 306063    |
| Sma-1-5936 | NW_003037814.1 | + | 100690    | 100739    |
| Sma-1-5937 | NW_003037837.1 | - | 440417    | 440368    |
| Sma-1-5938 | NW_003037884.1 | - | 1255104   | 1255055   |
| Sma-1-5939 | NW_003037888.1 | + | 986195    | 986244    |
| Sma-1-5940 | NW_003037914.1 | + | 13357     | 13406     |
| Sma-1-5941 | NW_003037943.1 | - | 414321    | 414272    |
| Sma-1-5942 | NW_003037956.1 | + | 327956    | 328005    |
| Sma-1-5943 | NW_003037963.1 | + | 99758     | 99807     |
| Sma-1-5944 | NW_003038021.1 | - | 788060    | 788011    |
| Sma-1-5945 | NW_003038128.1 | - | 74707     | 74658     |
| Sma-1-5946 | NS_000200.1    | + | 43084550  | 43084599  |
| Sma-1-5947 | NS_000200.1    | + | 133194687 | 133194736 |
| Sma-1-5948 | NS_000200.1    | + | 160157607 | 160157656 |
| Sma-1-5949 | NS_000200.1    | + | 194384411 | 194384460 |
| Sma-1-5950 | NS_000200.1    | + | 197377970 | 197378019 |
| Sma-1-5951 | NS_000200.1    | - | 374644719 | 374644670 |
| Sma-1-5952 | NS_000200.1    | - | 322496856 | 322496807 |
| Sma-1-5953 | NS_000200.1    | - | 280792995 | 280792946 |
| Sma-1-5954 | NS_000200.1    | - | 235616635 | 235616586 |
| Sma-1-5955 | NS_000200.1    | - | 187435854 | 187435805 |
| Sma-1-5956 | NS_000200.1    | - | 128034769 | 128034720 |
| Sma-1-5957 | NS_000200.1    | - | 77246275  | 77246226  |
| Sma-1-5958 | NW_003022492.1 | + | 1424      | 1473      |
| Sma-1-5959 | NW_003026468.1 | - | 52826     | 52777     |
| Sma-1-5960 | NW_003038024.1 | + | 125879    | 125928    |
| Sma-1-5961 | NS_000200.1    | + | 238022908 | 238022957 |
| Sma-1-5962 | NS_000200.1    | + | 365045836 | 365045885 |
| Sma-1-5963 | NS_000200.1    | - | 216246847 | 216246798 |
| Sma-1-5964 | NW_003038014.1 | - | 184021    | 183972    |
| Sma-1-5965 | NS_000200.1    | - | 229924710 | 229924661 |
| Sma-1-5966 | NW_003037793.1 | + | 247954    | 248003    |
| Sma-1-5967 | NW_003037882.1 | - | 624700    | 624651    |
| Sma-1-5968 | NW_003037938.1 | - | 602016    | 601967    |
| Sma-1-5969 | NW_003038153.1 | - | 295641    | 295592    |
| Sma-1-5970 | NS_000200.1    | + | 247954    | 248003    |
| Sma-1-5971 | NS_000200.1    | - | 293357690 | 293357641 |
| Sma-1-5972 | NS_000200.1    | - | 182639129 | 182639080 |
| Sma-1-5973 | NS_000200.1    | - | 125916374 | 125916325 |
| Sma-1-5974 | NW_003037787.1 | + | 64038     | 64087     |
| Sma-1-5975 | NS_000200.1    | + | 380312207 | 380312256 |
| Sma-1-5976 | NW_003037807.1 | + | 1153606   | 1153655   |
| Sma-1-5977 | NS_000200.1    | + | 31415122  | 31415171  |
| Sma-1-5978 | NW_003037852.1 | - | 525278    | 525229    |
| Sma-1-5979 | NS_000200.1    | - | 94917173  | 94917124  |
| Sma-1-5980 | NW_003037827.1 | + | 1188787   | 1188836   |
| Sma-1-5981 | NS_000200.1    | + | 63810928  | 63810977  |
| Sma-1-5982 | NW_003037796.1 | + | 46970     | 47019     |
| Sma-1-5983 | NS_000200.1    | + | 8256614   | 8256663   |
| Sma-1-5984 | NW_003024301.1 | - | 2426      | 2377      |
| Sma-1-5985 | NS_000200.1    | - | 365474777 | 365474728 |
| Sma-1-5986 | NW_003035880.1 | - | 289103    | 289054    |

|            |                |   |           |           |
|------------|----------------|---|-----------|-----------|
| Sma-1-5987 | NS_000200.1    | - | 339530167 | 339530118 |
| Sma-1-5988 | NW_003037832.1 | - | 550968    | 550919    |
| Sma-1-5989 | NS_000200.1    | - | 71760399  | 71760350  |
| Sma-1-5990 | NW_003037795.1 | + | 1339339   | 1339388   |
| Sma-1-5991 | NS_000200.1    | + | 7730222   | 7730271   |
| Sma-1-5992 | NW_003037986.1 | + | 93995     | 94044     |
| Sma-1-5993 | NS_000200.1    | + | 215510747 | 215510796 |
| Sma-1-5994 | NW_003026456.1 | - | 321515    | 321466    |
| Sma-1-5995 | NS_000200.1    | - | 58244651  | 58244602  |
| Sma-1-5996 | NW_003038147.1 | - | 364000    | 363951    |
| Sma-1-5997 | NS_000200.1    | - | 289891743 | 289891694 |
| Sma-1-5998 | NW_003038244.1 | - | 436559    | 436510    |
| Sma-1-5999 | NS_000200.1    | - | 315581764 | 315581715 |
| Sma-1-6000 | NW_003037844.1 | + | 406872    | 406921    |
| Sma-1-6001 | NS_000200.1    | + | 86590318  | 86590367  |
| Sma-1-6002 | NW_003037902.1 | + | 276733    | 276782    |
| Sma-1-6003 | NW_003037913.1 | + | 682315    | 682364    |
| Sma-1-6004 | NS_000200.1    | + | 147031967 | 147032016 |
| Sma-1-6005 | NS_000200.1    | + | 159246066 | 159246115 |
| Sma-1-6006 | NW_003037804.1 | - | 986982    | 986933    |
| Sma-1-6007 | NS_000200.1    | - | 26127002  | 26126953  |
| Sma-1-6008 | NW_003037798.1 | + | 1948184   | 1948233   |
| Sma-1-6009 | NS_000200.1    | + | 16207342  | 16207391  |
| Sma-1-6010 | NW_003038141.1 | + | 265095    | 265144    |
| Sma-1-6011 | NS_000200.1    | + | 287155074 | 287155123 |
| Sma-1-6012 | NW_003023322.1 | - | 1251      | 1202      |
| Sma-1-6013 | NS_000200.1    | - | 372961495 | 372961446 |
| Sma-1-6014 | NW_003038232.1 | - | 18320     | 18271     |
| Sma-1-6015 | NS_000200.1    | - | 311982111 | 311982062 |
| Sma-1-6016 | NW_003024936.1 | - | 647       | 598       |
| Sma-1-6017 | NW_003030988.1 | + | 412       | 461       |
| Sma-1-6018 | NW_003026471.1 | - | 108253    | 108204    |
| Sma-1-6019 | NW_003037928.1 | + | 487161    | 487210    |
| Sma-1-6020 | NS_000200.1    | + | 174811114 | 174811163 |
| Sma-1-6021 | NS_000200.1    | + | 370671035 | 370671084 |
| Sma-1-6022 | NS_000200.1    | - | 355741168 | 355741119 |
| Sma-1-6023 | NS_000200.1    | - | 222220486 | 222220437 |
| Sma-1-6024 | NW_003037848.1 | + | 521004    | 521053    |
| Sma-1-6025 | NS_000200.1    | + | 90214075  | 90214124  |
| Sma-1-6026 | NW_003037905.1 | - | 1036027   | 1035978   |
| Sma-1-6027 | NS_000200.1    | - | 150305039 | 150304990 |
| Sma-1-6028 | NW_003038234.1 | + | 101312    | 101361    |
| Sma-1-6029 | NS_000200.1    | + | 312938081 | 312938130 |
| Sma-1-6030 | NW_003026617.1 | - | 184119    | 184070    |
| Sma-1-6031 | NW_003037793.1 | + | 682993    | 683042    |
| Sma-1-6032 | NS_000200.1    | + | 682993    | 683042    |
| Sma-1-6033 | NS_000200.1    | - | 319754978 | 319754929 |
| Sma-1-6034 | NW_003038138.1 | - | 93932     | 93883     |
| Sma-1-6035 | NS_000200.1    | - | 285649247 | 285649198 |
| Sma-1-6036 | NW_003026513.1 | - | 68612     | 68563     |
| Sma-1-6037 | NS_000200.1    | - | 285483148 | 285483099 |
| Sma-1-6038 | NW_003037800.1 | - | 52071     | 52022     |

|            |                |   |           |           |
|------------|----------------|---|-----------|-----------|
| Sma-1-6039 | NS_000200.1    | - | 18681431  | 18681382  |
| Sma-1-6040 | NW_003037941.1 | + | 483388    | 483437    |
| Sma-1-6041 | NS_000200.1    | + | 185217862 | 185217911 |
| Sma-1-6042 | NW_003027567.1 | - | 372       | 323       |
| Sma-1-6043 | NW_003037940.1 | + | 973321    | 973370    |
| Sma-1-6044 | NS_000200.1    | + | 184715451 | 184715500 |
| Sma-1-6045 | NS_000200.1    | - | 361637035 | 361636986 |
| Sma-1-6046 | NW_003026458.1 | - | 332457    | 332408    |
| Sma-1-6047 | NS_000200.1    | - | 102200687 | 102200638 |
| Sma-1-6048 | NW_003037824.1 | - | 367164    | 367115    |
| Sma-1-6049 | NS_000200.1    | - | 57298104  | 57298055  |
| Sma-1-6050 | NW_003038011.1 | + | 599526    | 599575    |
| Sma-1-6051 | NS_000200.1    | + | 228127176 | 228127225 |
| Sma-1-6052 | NW_003038261.1 | - | 208313    | 208264    |
| Sma-1-6053 | NS_000200.1    | - | 323821964 | 323821915 |
| Sma-1-6054 | NW_003037792.1 | - | 161498    | 161449    |
| Sma-1-6055 | NS_000200.1    | - | 382598842 | 382598793 |
| Sma-1-6056 | NW_003035880.1 | - | 347065    | 347016    |
| Sma-1-6057 | NW_003026458.1 | - | 705470    | 705421    |
| Sma-1-6058 | NS_000200.1    | - | 339588129 | 339588080 |
| Sma-1-6059 | NS_000200.1    | - | 102573700 | 102573651 |
| Sma-1-6060 | NW_003037714.1 | + | 15866     | 15915     |
| Sma-1-6061 | NS_000200.1    | + | 376047442 | 376047491 |
| Sma-1-6062 | NW_003037909.1 | + | 881834    | 881883    |
| Sma-1-6063 | NS_000200.1    | + | 154423483 | 154423532 |
| Sma-1-6064 | NW_003037818.1 | - | 2127727   | 2127678   |
| Sma-1-6065 | NS_000200.1    | - | 50843134  | 50843085  |
| Sma-1-6066 | NW_003037793.1 | + | 3428365   | 3428414   |
| Sma-1-6067 | NS_000200.1    | + | 3428365   | 3428414   |
| Sma-1-6068 | NW_003036447.1 | - | 986       | 937       |
| Sma-1-6069 | NS_000200.1    | - | 354579817 | 354579768 |
| Sma-1-6070 | NW_003035881.1 | + | 393414    | 393463    |
| Sma-1-6071 | NS_000200.1    | + | 341457619 | 341457668 |
| Sma-1-6072 | NW_003038010.1 | - | 376887    | 376838    |
| Sma-1-6073 | NS_000200.1    | - | 227195110 | 227195061 |
| Sma-1-6074 | NW_003031336.1 | - | 871       | 822       |
| Sma-1-6075 | NS_000200.1    | - | 345774841 | 345774792 |
| Sma-1-6076 | NW_003037953.1 | - | 113818    | 113769    |
| Sma-1-6077 | NS_000200.1    | - | 193026869 | 193026820 |
| Sma-1-6078 | NW_003027652.1 | - | 986       | 937       |
| Sma-1-6079 | NS_000200.1    | - | 361804786 | 361804737 |
| Sma-1-6080 | NW_003038261.1 | + | 683982    | 684031    |
| Sma-1-6081 | NS_000200.1    | + | 324297633 | 324297682 |
| Sma-1-6082 | NW_003038025.1 | + | 573372    | 573421    |
| Sma-1-6083 | NS_000200.1    | + | 239431617 | 239431666 |
| Sma-1-6084 | NW_003037980.1 | - | 103323    | 103274    |
| Sma-1-6085 | NS_000200.1    | - | 211064185 | 211064136 |
| Sma-1-6086 | NW_003037994.1 | + | 247873    | 247922    |
| Sma-1-6087 | NW_003038024.1 | - | 727081    | 727032    |
| Sma-1-6088 | NS_000200.1    | + | 218779687 | 218779736 |
| Sma-1-6089 | NS_000200.1    | - | 238624110 | 238624061 |
| Sma-1-6090 | NW_003038244.1 | + | 325207    | 325256    |

|            |                |   |           |           |
|------------|----------------|---|-----------|-----------|
| Sma-1-6091 | NW_003037798.1 | + | 2406972   | 2407021   |
| Sma-1-6092 | NW_003037810.1 | + | 751811    | 751860    |
| Sma-1-6093 | NW_003037848.1 | + | 596139    | 596188    |
| Sma-1-6094 | NW_003037848.1 | - | 595723    | 595674    |
| Sma-1-6095 | NW_003037868.1 | + | 121604    | 121653    |
| Sma-1-6096 | NW_003037909.1 | - | 234017    | 233968    |
| Sma-1-6097 | NW_003037913.1 | + | 1022780   | 1022829   |
| Sma-1-6098 | NW_003037955.1 | - | 114935    | 114886    |
| Sma-1-6099 | NW_003037997.1 | + | 452305    | 452354    |
| Sma-1-6100 | NS_000200.1    | + | 16666130  | 16666179  |
| Sma-1-6101 | NS_000200.1    | + | 37356333  | 37356382  |
| Sma-1-6102 | NS_000200.1    | + | 90289210  | 90289259  |
| Sma-1-6103 | NS_000200.1    | + | 116093316 | 116093365 |
| Sma-1-6104 | NS_000200.1    | + | 159586531 | 159586580 |
| Sma-1-6105 | NS_000200.1    | + | 221263747 | 221263796 |
| Sma-1-6106 | NS_000200.1    | + | 315470412 | 315470461 |
| Sma-1-6107 | NS_000200.1    | - | 193741669 | 193741620 |
| Sma-1-6108 | NS_000200.1    | - | 153775666 | 153775617 |
| Sma-1-6109 | NS_000200.1    | - | 90288794  | 90288745  |
| Sma-1-6110 | NW_003038073.1 | - | 230484    | 230435    |
| Sma-1-6111 | NS_000200.1    | - | 265752917 | 265752868 |
| Sma-1-6112 | NW_003026472.1 | + | 33784     | 33833     |
| Sma-1-6113 | NS_000200.1    | + | 236445776 | 236445825 |
| Sma-1-6114 | NW_003037946.1 | - | 1142473   | 1142424   |
| Sma-1-6115 | NW_003038023.1 | + | 349775    | 349824    |
| Sma-1-6116 | NS_000200.1    | + | 237510066 | 237510115 |
| Sma-1-6117 | NS_000200.1    | - | 191836333 | 191836284 |
| Sma-1-6118 | NW_003026517.1 | + | 634049    | 634098    |
| Sma-1-6119 | NS_000200.1    | + | 300240058 | 300240107 |
| Sma-1-6120 | NW_003038120.1 | - | 205676    | 205627    |
| Sma-1-6121 | NS_000200.1    | - | 278390899 | 278390850 |
| Sma-1-6122 | NW_003020303.1 | - | 1463      | 1414      |
| Sma-1-6123 | NW_003038064.1 | - | 92274     | 92225     |
| Sma-1-6124 | NW_003038086.1 | - | 377071    | 377022    |
| Sma-1-6125 | NS_000200.1    | - | 371375853 | 371375804 |
| Sma-1-6126 | NS_000200.1    | - | 272625664 | 272625615 |
| Sma-1-6127 | NS_000200.1    | - | 261928851 | 261928802 |
| Sma-1-6128 | NW_003037798.1 | - | 1867674   | 1867625   |
| Sma-1-6129 | NW_003037848.1 | - | 570008    | 569959    |
| Sma-1-6130 | NS_000200.1    | - | 90263079  | 90263030  |
| Sma-1-6131 | NS_000200.1    | - | 16126832  | 16126783  |
| Sma-1-6132 | NW_003038053.1 | + | 63938     | 63987     |
| Sma-1-6133 | NS_000200.1    | + | 257424033 | 257424082 |
| Sma-1-6134 | NW_003037868.1 | + | 27091     | 27139     |
| Sma-1-6135 | NS_000200.1    | + | 115998803 | 115998851 |
| Sma-1-6136 | NW_003038033.1 | + | 840428    | 840477    |
| Sma-1-6137 | NS_000200.1    | + | 246820430 | 246820479 |
| Sma-1-6138 | NW_003037824.1 | + | 346196    | 346245    |
| Sma-1-6139 | NS_000200.1    | + | 57277136  | 57277185  |
| Sma-1-6140 | NW_003038215.1 | + | 41563     | 41612     |
| Sma-1-6141 | NS_000200.1    | + | 306654599 | 306654648 |
| Sma-1-6142 | NW_003037838.1 | - | 508305    | 508256    |

|            |                |   |           |           |
|------------|----------------|---|-----------|-----------|
| Sma-1-6143 | NS.000200.1    | - | 78506868  | 78506819  |
| Sma-1-6144 | NW_003038132.1 | + | 328881    | 328930    |
| Sma-1-6145 | NS.000200.1    | + | 282749351 | 282749400 |
| Sma-1-6146 | NW_003038038.1 | + | 310502    | 310551    |
| Sma-1-6147 | NS.000200.1    | + | 252213895 | 252213944 |
| Sma-1-6148 | NW_003037822.1 | - | 318660    | 318611    |
| Sma-1-6149 | NW_003037980.1 | + | 1157399   | 1157448   |
| Sma-1-6150 | NS.000200.1    | + | 212118261 | 212118310 |
| Sma-1-6151 | NS.000200.1    | - | 54626666  | 54626617  |
| Sma-1-6152 | NW_003037992.1 | + | 219108    | 219157    |
| Sma-1-6153 | NS.000200.1    | + | 218060589 | 218060638 |
| Sma-1-6154 | NW_003038014.1 | + | 390785    | 390834    |
| Sma-1-6155 | NS.000200.1    | + | 230131474 | 230131523 |
| Sma-1-6156 | NW_003037853.1 | + | 649605    | 649654    |
| Sma-1-6157 | NW_003037942.1 | + | 428221    | 428270    |
| Sma-1-6158 | NS.000200.1    | + | 96141656  | 96141705  |
| Sma-1-6159 | NS.000200.1    | + | 186188129 | 186188178 |
| Sma-1-6160 | NW_003038010.1 | - | 455496    | 455447    |
| Sma-1-6161 | NS.000200.1    | - | 227273719 | 227273670 |
| Sma-1-6162 | NW_003037879.1 | - | 247850    | 247801    |
| Sma-1-6163 | NS.000200.1    | - | 123250106 | 123250057 |
| Sma-1-6164 | NW_003038114.1 | - | 138227    | 138178    |
| Sma-1-6165 | NS.000200.1    | - | 276864132 | 276864083 |
| Sma-1-6166 | NW_003037825.1 | - | 815311    | 815262    |
| Sma-1-6167 | NS.000200.1    | - | 59945093  | 59945044  |
| Sma-1-6168 | NW_003038005.1 | - | 455564    | 455515    |
| Sma-1-6169 | NS.000200.1    | - | 224861518 | 224861469 |
| Sma-1-6170 | NW_003038023.1 | + | 100314    | 100363    |
| Sma-1-6171 | NS.000200.1    | + | 237260605 | 237260654 |
| Sma-1-6172 | NW_003025689.1 | + | 663       | 712       |
| Sma-1-6173 | NW_003026472.1 | - | 29670     | 29621     |
| Sma-1-6174 | NW_003026460.1 | - | 303644    | 303595    |
| Sma-1-6175 | NW_003037818.1 | + | 383566    | 383615    |
| Sma-1-6176 | NW_003037822.1 | + | 716165    | 716214    |
| Sma-1-6177 | NW_003037822.1 | - | 713732    | 713683    |
| Sma-1-6178 | NW_003037845.1 | + | 559532    | 559581    |
| Sma-1-6179 | NW_003037892.1 | + | 294879    | 294928    |
| Sma-1-6180 | NW_003037909.1 | - | 374838    | 374789    |
| Sma-1-6181 | NW_003037979.1 | + | 708164    | 708213    |
| Sma-1-6182 | NW_003038257.1 | - | 251339    | 251290    |
| Sma-1-6183 | NW_003026516.1 | + | 326274    | 326323    |
| Sma-1-6184 | NS.000200.1    | + | 49098973  | 49099022  |
| Sma-1-6185 | NS.000200.1    | + | 55024171  | 55024220  |
| Sma-1-6186 | NS.000200.1    | + | 87561435  | 87561484  |
| Sma-1-6187 | NS.000200.1    | + | 141018106 | 141018155 |
| Sma-1-6188 | NS.000200.1    | + | 210769184 | 210769233 |
| Sma-1-6189 | NS.000200.1    | + | 299434571 | 299434620 |
| Sma-1-6190 | NS.000200.1    | + | 356364622 | 356364671 |
| Sma-1-6191 | NS.000200.1    | - | 321425667 | 321425618 |
| Sma-1-6192 | NS.000200.1    | - | 236441662 | 236441613 |
| Sma-1-6193 | NS.000200.1    | - | 170825850 | 170825801 |
| Sma-1-6194 | NS.000200.1    | - | 153916487 | 153916438 |

|            |                |   |           |           |
|------------|----------------|---|-----------|-----------|
| Sma-1-6195 | NS_000200.1    | - | 55021738  | 55021689  |
| Sma-1-6196 | NW_003037830.1 | - | 221006    | 220956    |
| Sma-1-6197 | NS_000200.1    | - | 68111377  | 68111327  |
| Sma-1-6198 | NW_003026615.1 | - | 196023    | 195974    |
| Sma-1-6199 | NW_003037953.1 | - | 227011    | 226962    |
| Sma-1-6200 | NW_003038153.1 | - | 602933    | 602884    |
| Sma-1-6201 | NS_000200.1    | - | 317190464 | 317190415 |
| Sma-1-6202 | NS_000200.1    | - | 293664982 | 293664933 |
| Sma-1-6203 | NS_000200.1    | - | 193140062 | 193140013 |
| Sma-1-6204 | NW_003037873.1 | + | 32849     | 32898     |
| Sma-1-6205 | NW_003037831.1 | - | 1106560   | 1106511   |
| Sma-1-6206 | NW_003037890.1 | - | 186762    | 186713    |
| Sma-1-6207 | NW_003037891.1 | + | 1844226   | 1844275   |
| Sma-1-6208 | NW_003037919.1 | - | 91937     | 91888     |
| Sma-1-6209 | NW_003038159.1 | - | 152447    | 152398    |
| Sma-1-6210 | NS_000200.1    | + | 118771977 | 118772026 |
| Sma-1-6211 | NS_000200.1    | + | 139725504 | 139725553 |
| Sma-1-6212 | NS_000200.1    | - | 296540468 | 296540419 |
| Sma-1-6213 | NS_000200.1    | - | 168949866 | 168949817 |
| Sma-1-6214 | NS_000200.1    | - | 135870123 | 135870074 |
| Sma-1-6215 | NS_000200.1    | - | 70555862  | 70555813  |
| Sma-1-6216 | NW_003037861.1 | - | 866820    | 866771    |
| Sma-1-6217 | NS_000200.1    | - | 105643274 | 105643225 |
| Sma-1-6218 | NW_003037854.1 | + | 907587    | 907636    |
| Sma-1-6219 | NS_000200.1    | + | 97812008  | 97812057  |
| Sma-1-6220 | NW_003038212.1 | - | 11039     | 10990     |
| Sma-1-6221 | NS_000200.1    | - | 306174930 | 306174881 |
| Sma-1-6222 | NW_003029612.1 | + | 239       | 288       |
| Sma-1-6223 | NS_000200.1    | + | 366251356 | 366251405 |
| Sma-1-6224 | NW_003037844.1 | + | 30265     | 30314     |
| Sma-1-6225 | NS_000200.1    | + | 86213711  | 86213760  |
| Sma-1-6226 | NW_003037895.1 | + | 282999    | 283048    |
| Sma-1-6227 | NS_000200.1    | + | 142729201 | 142729250 |
| Sma-1-6228 | NW_003037838.1 | - | 829056    | 829007    |
| Sma-1-6229 | NS_000200.1    | - | 78827619  | 78827570  |
| Sma-1-6230 | NW_003038489.1 | + | 115254    | 115303    |
| Sma-1-6231 | NS_000200.1    | + | 333827537 | 333827586 |
| Sma-1-6232 | NW_003038086.1 | - | 413649    | 413600    |
| Sma-1-6233 | NS_000200.1    | - | 272662242 | 272662193 |
| Sma-1-6234 | NW_003037916.1 | + | 895808    | 895857    |
| Sma-1-6235 | NS_000200.1    | + | 164089219 | 164089268 |
| Sma-1-6236 | NW_003037943.1 | + | 742588    | 742637    |
| Sma-1-6237 | NS_000200.1    | + | 187764121 | 187764170 |
| Sma-1-6238 | NW_003038456.1 | - | 54402     | 54353     |
| Sma-1-6239 | NS_000200.1    | - | 330924666 | 330924617 |
| Sma-1-6240 | NW_003026618.1 | + | 83708     | 83757     |
| Sma-1-6241 | NS_000200.1    | + | 321838710 | 321838759 |
| Sma-1-6242 | NW_003029845.1 | + | 58        | 107       |
| Sma-1-6243 | NW_003038504.1 | - | 871       | 822       |
| Sma-1-6244 | NW_003037927.1 | - | 104878    | 104829    |
| Sma-1-6245 | NW_003026619.1 | + | 72010     | 72059     |
| Sma-1-6246 | NS_000200.1    | + | 322262754 | 322262803 |

|            |                |   |           |           |
|------------|----------------|---|-----------|-----------|
| Sma-1-6247 | NS.000200.1    | + | 376401042 | 376401091 |
| Sma-1-6248 | NS.000200.1    | - | 335849403 | 335849354 |
| Sma-1-6249 | NS.000200.1    | - | 174082241 | 174082192 |
| Sma-1-6250 | NW.003038153.1 | - | 698066    | 698017    |
| Sma-1-6251 | NS.000200.1    | - | 293760115 | 293760066 |
| Sma-1-6252 | NW.003032147.1 | - | 5723      | 5674      |
| Sma-1-6253 | NW.003038443.1 | - | 25035     | 24986     |
| Sma-1-6254 | NW.003038002.1 | + | 37618     | 37667     |
| Sma-1-6255 | NW.003037813.1 | - | 1089086   | 1089037   |
| Sma-1-6256 | NW.003037846.1 | + | 971031    | 971080    |
| Sma-1-6257 | NW.003037879.1 | - | 667768    | 667719    |
| Sma-1-6258 | NW.003037881.1 | - | 431295    | 431246    |
| Sma-1-6259 | NW.003037885.1 | - | 418008    | 417959    |
| Sma-1-6260 | NW.003037902.1 | + | 498746    | 498795    |
| Sma-1-6261 | NW.003037980.1 | - | 827373    | 827324    |
| Sma-1-6262 | NW.003038027.1 | + | 439621    | 439670    |
| Sma-1-6263 | NW.003038133.1 | + | 157217    | 157266    |
| Sma-1-6264 | NW.003038133.1 | - | 156953    | 156904    |
| Sma-1-6265 | NS.000200.1    | + | 88605601  | 88605650  |
| Sma-1-6266 | NS.000200.1    | + | 147253980 | 147254029 |
| Sma-1-6267 | NS.000200.1    | + | 223157827 | 223157876 |
| Sma-1-6268 | NS.000200.1    | + | 240810335 | 240810384 |
| Sma-1-6269 | NS.000200.1    | + | 283029399 | 283029448 |
| Sma-1-6270 | NS.000200.1    | - | 379067997 | 379067948 |
| Sma-1-6271 | NS.000200.1    | - | 330054681 | 330054632 |
| Sma-1-6272 | NS.000200.1    | - | 283029135 | 283029086 |
| Sma-1-6273 | NS.000200.1    | - | 211788235 | 211788186 |
| Sma-1-6274 | NS.000200.1    | - | 128515955 | 128515906 |
| Sma-1-6275 | NS.000200.1    | - | 124863086 | 124863037 |
| Sma-1-6276 | NS.000200.1    | - | 123670024 | 123669975 |
| Sma-1-6277 | NS.000200.1    | - | 42075949  | 42075900  |
| Sma-1-6278 | NW.003038246.1 | - | 173619    | 173570    |
| Sma-1-6279 | NS.000200.1    | - | 315814747 | 315814698 |
| Sma-1-6280 | NW.003037866.1 | + | 1069531   | 1069580   |
| Sma-1-6281 | NS.000200.1    | + | 112557330 | 112557379 |
| Sma-1-6282 | NW.003037833.1 | + | 47084     | 47133     |
| Sma-1-6283 | NS.000200.1    | + | 72238180  | 72238229  |
| Sma-1-6284 | NW.003037825.1 | + | 379792    | 379841    |
| Sma-1-6285 | NS.000200.1    | + | 59509574  | 59509623  |
| Sma-1-6286 | NW.003037822.1 | - | 146486    | 146437    |
| Sma-1-6287 | NS.000200.1    | - | 54454492  | 54454443  |
| Sma-1-6288 | NW.003036796.1 | - | 498       | 449       |
| Sma-1-6289 | NW.003037793.1 | + | 306904    | 306953    |
| Sma-1-6290 | NS.000200.1    | + | 306904    | 306953    |
| Sma-1-6291 | NS.000200.1    | - | 347673221 | 347673172 |
| Sma-1-6292 | NW.003037978.1 | - | 109308    | 109259    |
| Sma-1-6293 | NS.000200.1    | - | 209377318 | 209377269 |
| Sma-1-6294 | NW.003038037.1 | + | 587883    | 587932    |
| Sma-1-6295 | NS.000200.1    | + | 250743292 | 250743341 |
| Sma-1-6296 | NW.003038249.1 | + | 70187     | 70236     |
| Sma-1-6297 | NS.000200.1    | + | 316752440 | 316752489 |
| Sma-1-6298 | NW.003026506.1 | - | 33553     | 33504     |

|            |                |   |           |           |
|------------|----------------|---|-----------|-----------|
| Sma-1-6299 | NS_000200.1    | - | 279594618 | 279594569 |
| Sma-1-6300 | NW_003037809.1 | + | 2596321   | 2596370   |
| Sma-1-6301 | NS_000200.1    | + | 36260785  | 36260834  |
| Sma-1-6302 | NW_003037925.1 | - | 427922    | 427873    |
| Sma-1-6303 | NS_000200.1    | - | 172829925 | 172829876 |
| Sma-1-6304 | NW_003037940.1 | + | 74942     | 74991     |
| Sma-1-6305 | NS_000200.1    | + | 183817072 | 183817121 |
| Sma-1-6306 | NW_003035639.1 | + | 4577      | 4626      |
| Sma-1-6307 | NS_000200.1    | + | 329955017 | 329955066 |
| Sma-1-6308 | NW_003037825.1 | - | 1205177   | 1205128   |
| Sma-1-6309 | NS_000200.1    | - | 60334959  | 60334910  |
| Sma-1-6310 | NW_003035660.1 | - | 2263      | 2214      |
| Sma-1-6311 | NS_000200.1    | - | 330548576 | 330548527 |
| Sma-1-6312 | NW_003026465.1 | + | 850608    | 850657    |
| Sma-1-6313 | NW_003037889.1 | + | 1759862   | 1759911   |
| Sma-1-6314 | NS_000200.1    | + | 135536352 | 135536401 |
| Sma-1-6315 | NS_000200.1    | + | 208243202 | 208243251 |
| Sma-1-6316 | NW_003038132.1 | - | 352020    | 351971    |
| Sma-1-6317 | NS_000200.1    | - | 282772490 | 282772441 |
| Sma-1-6318 | NW_003038080.1 | + | 370066    | 370115    |
| Sma-1-6319 | NS_000200.1    | + | 268822676 | 268822725 |
| Sma-1-6320 | NW_003038033.1 | + | 441961    | 442010    |
| Sma-1-6321 | NS_000200.1    | + | 246421963 | 246422012 |
| Sma-1-6322 | NW_003038041.1 | + | 126950    | 126999    |
| Sma-1-6323 | NS_000200.1    | + | 253794232 | 253794281 |
| Sma-1-6324 | NW_003026617.1 | - | 109711    | 109662    |
| Sma-1-6325 | NW_003037951.1 | + | 54412     | 54461     |
| Sma-1-6326 | NW_003037816.1 | - | 437208    | 437159    |
| Sma-1-6327 | NW_003037836.1 | - | 814082    | 814033    |
| Sma-1-6328 | NW_003037861.1 | - | 650159    | 650110    |
| Sma-1-6329 | NW_003037896.1 | + | 465669    | 465718    |
| Sma-1-6330 | NW_003038037.1 | + | 190121    | 190170    |
| Sma-1-6331 | NW_003038257.1 | + | 467376    | 467425    |
| Sma-1-6332 | NS_000200.1    | + | 143386092 | 143386141 |
| Sma-1-6333 | NS_000200.1    | + | 192732137 | 192732186 |
| Sma-1-6334 | NS_000200.1    | + | 250345530 | 250345579 |
| Sma-1-6335 | NS_000200.1    | + | 321641704 | 321641753 |
| Sma-1-6336 | NS_000200.1    | - | 319680570 | 319680521 |
| Sma-1-6337 | NS_000200.1    | - | 105426613 | 105426564 |
| Sma-1-6338 | NS_000200.1    | - | 76371181  | 76371132  |
| Sma-1-6339 | NS_000200.1    | - | 46646080  | 46646031  |
| Sma-1-6340 | NW_003037883.1 | - | 323042    | 322993    |
| Sma-1-6341 | NS_000200.1    | - | 126386765 | 126386716 |
| Sma-1-6342 | NW_003037877.1 | - | 323177    | 323128    |
| Sma-1-6343 | NS_000200.1    | - | 121361739 | 121361690 |
| Sma-1-6344 | NW_003037884.1 | + | 1163544   | 1163593   |
| Sma-1-6345 | NS_000200.1    | + | 127943209 | 127943258 |
| Sma-1-6346 | NW_003037797.1 | + | 884246    | 884295    |
| Sma-1-6347 | NW_003037797.1 | - | 884549    | 884500    |
| Sma-1-6348 | NS_000200.1    | + | 11312106  | 11312155  |
| Sma-1-6349 | NS_000200.1    | - | 11312409  | 11312360  |
| Sma-1-6350 | NW_003037801.1 | + | 888703    | 888752    |



|            |                |   |           |           |
|------------|----------------|---|-----------|-----------|
| Sma-1-6351 | NS_000200.1    | + | 21978183  | 21978232  |
| Sma-1-6352 | NW_003037964.1 | + | 110168    | 110217    |
| Sma-1-6353 | NS_000200.1    | + | 197711690 | 197711739 |
| Sma-1-6354 | NW_003026512.1 | - | 174856    | 174807    |
| Sma-1-6355 | NS_000200.1    | - | 285268896 | 285268847 |
| Sma-1-6356 | NW_003037992.1 | - | 249257    | 249208    |
| Sma-1-6357 | NS_000200.1    | - | 218090738 | 218090689 |
| Sma-1-6358 | NW_003037825.1 | + | 1082794   | 1082843   |
| Sma-1-6359 | NW_003037886.1 | + | 908471    | 908520    |
| Sma-1-6360 | NW_003037888.1 | - | 804244    | 804195    |
| Sma-1-6361 | NW_003037941.1 | + | 190517    | 190566    |
| Sma-1-6362 | NW_003038031.1 | + | 72339     | 72388     |
| Sma-1-6363 | NW_003038505.1 | + | 269090    | 269139    |
| Sma-1-6364 | NS_000200.1    | + | 60212576  | 60212625  |
| Sma-1-6365 | NS_000200.1    | + | 130164038 | 130164087 |
| Sma-1-6366 | NS_000200.1    | + | 184924991 | 184925040 |
| Sma-1-6367 | NS_000200.1    | + | 244350097 | 244350146 |
| Sma-1-6368 | NS_000200.1    | + | 336348427 | 336348476 |
| Sma-1-6369 | NS_000200.1    | - | 133012736 | 133012687 |
| Sma-1-6370 | NW_003037873.1 | + | 566487    | 566536    |
| Sma-1-6371 | NS_000200.1    | + | 119305615 | 119305664 |
| Sma-1-6372 | NW_003037871.1 | + | 173199    | 173248    |
| Sma-1-6373 | NS_000200.1    | + | 117620937 | 117620986 |
| Sma-1-6374 | NW_003037864.1 | + | 1269652   | 1269701   |
| Sma-1-6375 | NS_000200.1    | + | 109762226 | 109762275 |
| Sma-1-6376 | NW_003037902.1 | - | 489913    | 489864    |
| Sma-1-6377 | NS_000200.1    | - | 147245147 | 147245098 |
| Sma-1-6378 | NW_003037808.1 | + | 747644    | 747693    |
| Sma-1-6379 | NS_000200.1    | + | 32534281  | 32534330  |
| Sma-1-6380 | NW_003037800.1 | - | 372543    | 372494    |
| Sma-1-6381 | NS_000200.1    | - | 19001903  | 19001854  |
| Sma-1-6382 | NW_003026557.1 | - | 5830      | 5781      |
| Sma-1-6383 | NS_000200.1    | - | 300993873 | 300993824 |
| Sma-1-6384 | NW_003037852.1 | + | 1046886   | 1046935   |
| Sma-1-6385 | NS_000200.1    | + | 95438781  | 95438830  |
| Sma-1-6386 | NW_003036400.1 | - | 6106      | 6057      |
| Sma-1-6387 | NW_003037812.1 | - | 1416814   | 1416765   |
| Sma-1-6388 | NW_003037812.1 | - | 1412551   | 1412502   |
| Sma-1-6389 | NW_003037915.1 | + | 228028    | 228077    |
| Sma-1-6390 | NS_000200.1    | + | 162128014 | 162128063 |
| Sma-1-6391 | NS_000200.1    | - | 359876289 | 359876240 |
| Sma-1-6392 | NS_000200.1    | - | 40899553  | 40899504  |
| Sma-1-6393 | NS_000200.1    | - | 40895290  | 40895241  |
| Sma-1-6394 | NW_003037813.1 | - | 1481102   | 1481053   |
| Sma-1-6395 | NS_000200.1    | - | 42467965  | 42467916  |
| Sma-1-6396 | NW_003037906.1 | + | 485350    | 485399    |
| Sma-1-6397 | NS_000200.1    | + | 150793129 | 150793178 |
| Sma-1-6398 | NW_003026458.1 | + | 766512    | 766561    |
| Sma-1-6399 | NS_000200.1    | + | 102634742 | 102634791 |
| Sma-1-6400 | NW_003038369.1 | - | 9120      | 9071      |
| Sma-1-6401 | NW_003038222.1 | + | 38075     | 38124     |
| Sma-1-6402 | NW_003037803.1 | + | 187098    | 187147    |

|            |                |   |           |           |
|------------|----------------|---|-----------|-----------|
| Sma-1-6403 | NW_003037848.1 | - | 1194245   | 1194196   |
| Sma-1-6404 | NW_003037917.1 | - | 474950    | 474901    |
| Sma-1-6405 | NW_003037976.1 | - | 504414    | 504365    |
| Sma-1-6406 | NS_000200.1    | + | 23687635  | 23687684  |
| Sma-1-6407 | NS_000200.1    | + | 308825739 | 308825788 |
| Sma-1-6408 | NS_000200.1    | - | 327118059 | 327118010 |
| Sma-1-6409 | NS_000200.1    | - | 207118729 | 207118680 |
| Sma-1-6410 | NS_000200.1    | - | 165511754 | 165511705 |
| Sma-1-6411 | NS_000200.1    | - | 90887316  | 90887267  |
| Sma-1-6412 | NW_003038145.1 | - | 8445      | 8396      |
| Sma-1-6413 | NS_000200.1    | - | 288619868 | 288619819 |
| Sma-1-6414 | NW_003038023.1 | + | 653499    | 653548    |
| Sma-1-6415 | NS_000200.1    | + | 237813790 | 237813839 |
| Sma-1-6416 | NW_003028440.1 | + | 645       | 694       |
| Sma-1-6417 | NW_003037821.1 | - | 929862    | 929813    |
| Sma-1-6418 | NS_000200.1    | + | 369635234 | 369635283 |
| Sma-1-6419 | NS_000200.1    | - | 54074346  | 54074297  |
| Sma-1-6420 | NW_003037917.1 | - | 1238743   | 1238694   |
| Sma-1-6421 | NS_000200.1    | - | 166275547 | 166275498 |
| Sma-1-6422 | NW_003037807.1 | - | 814679    | 814630    |
| Sma-1-6423 | NS_000200.1    | - | 31076195  | 31076146  |
| Sma-1-6424 | NW_003037806.1 | - | 273324    | 273275    |
| Sma-1-6425 | NW_003037854.1 | + | 1865553   | 1865602   |
| Sma-1-6426 | NW_003038028.1 | + | 693559    | 693608    |
| Sma-1-6427 | NS_000200.1    | + | 98769974  | 98770023  |
| Sma-1-6428 | NS_000200.1    | + | 242001133 | 242001182 |
| Sma-1-6429 | NS_000200.1    | - | 28468538  | 28468489  |
| Sma-1-6430 | NW_003037931.1 | + | 13006     | 13055     |
| Sma-1-6431 | NW_003037941.1 | + | 924658    | 924707    |
| Sma-1-6432 | NS_000200.1    | + | 176845673 | 176845722 |
| Sma-1-6433 | NS_000200.1    | + | 185659132 | 185659181 |
| Sma-1-6434 | NW_003037959.1 | - | 28293     | 28244     |
| Sma-1-6435 | NS_000200.1    | - | 195093926 | 195093877 |
| Sma-1-6436 | NW_003029656.1 | + | 124       | 173       |
| Sma-1-6437 | NW_003037822.1 | + | 1571995   | 1572044   |
| Sma-1-6438 | NW_003037844.1 | + | 782815    | 782864    |
| Sma-1-6439 | NW_003037897.1 | + | 107417    | 107466    |
| Sma-1-6440 | NS_000200.1    | + | 55880001  | 55880050  |
| Sma-1-6441 | NS_000200.1    | + | 86966261  | 86966310  |
| Sma-1-6442 | NS_000200.1    | + | 143589793 | 143589842 |
| Sma-1-6443 | NS_000200.1    | + | 366361312 | 366361361 |
| Sma-1-6444 | NW_003029802.1 | - | 3305      | 3256      |
| Sma-1-6445 | NW_003038478.1 | - | 6198      | 6149      |
| Sma-1-6446 | NW_003037817.1 | - | 377342    | 377293    |
| Sma-1-6447 | NW_003037836.1 | + | 298414    | 298463    |
| Sma-1-6448 | NW_003037866.1 | + | 527098    | 527147    |
| Sma-1-6449 | NW_003037902.1 | + | 604614    | 604663    |
| Sma-1-6450 | NW_003038032.1 | - | 577251    | 577202    |
| Sma-1-6451 | NS_000200.1    | + | 75855513  | 75855562  |
| Sma-1-6452 | NS_000200.1    | + | 112014897 | 112014946 |
| Sma-1-6453 | NS_000200.1    | + | 147359848 | 147359897 |
| Sma-1-6454 | NS_000200.1    | - | 375809829 | 375809780 |

|            |                |   |           |           |
|------------|----------------|---|-----------|-----------|
| Sma-1-6455 | NS.000200.1    | - | 332581232 | 332581183 |
| Sma-1-6456 | NS.000200.1    | - | 245736411 | 245736362 |
| Sma-1-6457 | NS.000200.1    | - | 47759694  | 47759645  |
| Sma-1-6458 | NW_003037818.1 | - | 1930178   | 1930129   |
| Sma-1-6459 | NS.000200.1    | - | 50645585  | 50645536  |
| Sma-1-6460 | NW_003037854.1 | - | 1839306   | 1839257   |
| Sma-1-6461 | NS.000200.1    | - | 98743727  | 98743678  |
| Sma-1-6462 | NW_003037827.1 | - | 735235    | 735186    |
| Sma-1-6463 | NS.000200.1    | - | 63357376  | 63357327  |
| Sma-1-6464 | NW_003037817.1 | + | 116141    | 116190    |
| Sma-1-6465 | NS.000200.1    | + | 47498493  | 47498542  |
| Sma-1-6466 | NW_003038011.1 | + | 280591    | 280640    |
| Sma-1-6467 | NS.000200.1    | + | 227808241 | 227808290 |
| Sma-1-6468 | NW_003037918.1 | - | 612192    | 612143    |
| Sma-1-6469 | NS.000200.1    | - | 167179182 | 167179133 |
| Sma-1-6470 | NW_003037982.1 | - | 1325209   | 1325160   |
| Sma-1-6471 | NS.000200.1    | - | 214984404 | 214984355 |
| Sma-1-6472 | NW_003038034.1 | - | 313185    | 313136    |
| Sma-1-6473 | NS.000200.1    | - | 247254941 | 247254892 |
| Sma-1-6474 | NW_003026456.1 | + | 365998    | 366047    |
| Sma-1-6475 | NW_003038037.1 | - | 71631     | 71582     |
| Sma-1-6476 | NS.000200.1    | + | 58289134  | 58289183  |
| Sma-1-6477 | NS.000200.1    | - | 250227040 | 250226991 |
| Sma-1-6478 | NW_003037945.1 | - | 1087306   | 1087257   |
| Sma-1-6479 | NS.000200.1    | - | 190189270 | 190189221 |
| Sma-1-6480 | NW_003024566.1 | + | 143       | 192       |
| Sma-1-6481 | NW_003037863.1 | - | 1173458   | 1173409   |
| Sma-1-6482 | NS.000200.1    | + | 348865015 | 348865064 |
| Sma-1-6483 | NS.000200.1    | - | 107931825 | 107931776 |
| Sma-1-6484 | NW_003037881.1 | - | 595383    | 595334    |
| Sma-1-6485 | NW_003037890.1 | + | 2072753   | 2072802   |
| Sma-1-6486 | NW_003037976.1 | - | 132358    | 132309    |
| Sma-1-6487 | NS.000200.1    | + | 137756114 | 137756163 |
| Sma-1-6488 | NS.000200.1    | - | 206746673 | 206746624 |
| Sma-1-6489 | NS.000200.1    | - | 125027174 | 125027125 |
| Sma-1-6490 | NW_003037909.1 | - | 943359    | 943310    |
| Sma-1-6491 | NW_003037972.1 | + | 725668    | 725717    |
| Sma-1-6492 | NS.000200.1    | + | 203201372 | 203201421 |
| Sma-1-6493 | NS.000200.1    | - | 154485008 | 154484959 |
| Sma-1-6494 | NW_003037924.1 | - | 183769    | 183720    |
| Sma-1-6495 | NS.000200.1    | - | 171890727 | 171890678 |
| Sma-1-6496 | NW_003038003.1 | - | 377276    | 377227    |
| Sma-1-6497 | NS.000200.1    | - | 223876558 | 223876509 |
| Sma-1-6498 | NW_003037793.1 | - | 3124913   | 3124864   |
| Sma-1-6499 | NS.000200.1    | - | 3124913   | 3124864   |
| Sma-1-6500 | NW_003037827.1 | + | 2460475   | 2460524   |
| Sma-1-6501 | NW_003038124.1 | + | 8490      | 8539      |
| Sma-1-6502 | NS.000200.1    | + | 65082616  | 65082665  |
| Sma-1-6503 | NS.000200.1    | + | 279001134 | 279001183 |
| Sma-1-6504 | NW_003037841.1 | + | 1760892   | 1760941   |
| Sma-1-6505 | NW_003038077.1 | - | 282099    | 282050    |
| Sma-1-6506 | NS.000200.1    | + | 84372073  | 84372122  |

|            |                |   |           |           |
|------------|----------------|---|-----------|-----------|
| Sma-1-6507 | NS_000200.1    | - | 267053739 | 267053690 |
| Sma-1-6508 | NW_003038034.1 | + | 25753     | 25802     |
| Sma-1-6509 | NS_000200.1    | + | 246967509 | 246967558 |
| Sma-1-6510 | NW_003026464.1 | + | 110120    | 110169    |
| Sma-1-6511 | NS_000200.1    | + | 203410429 | 203410478 |
| Sma-1-6512 | NW_003037788.1 | - | 18056     | 18007     |
| Sma-1-6513 | NS_000200.1    | - | 380465294 | 380465245 |
| Sma-1-6514 | NW_003038028.1 | - | 746257    | 746208    |
| Sma-1-6515 | NS_000200.1    | - | 242053831 | 242053782 |
| Sma-1-6516 | NW_003039127.1 | + | 1943795   | 1943844   |
| Sma-1-6517 | NW_003038055.1 | - | 235868    | 235819    |
| Sma-1-6518 | NS_000200.1    | + | 115021294 | 115021343 |
| Sma-1-6519 | NS_000200.1    | - | 258935190 | 258935141 |
| Sma-1-6520 | NW_003038017.1 | + | 146849    | 146898    |
| Sma-1-6521 | NS_000200.1    | + | 231912880 | 231912929 |
| Sma-1-6522 | NW_003038261.1 | - | 529082    | 529033    |
| Sma-1-6523 | NS_000200.1    | - | 324142733 | 324142684 |
| Sma-1-6524 | NW_003028386.1 | + | 722       | 771       |
| Sma-1-6525 | NW_003037876.1 | - | 232080    | 232031    |
| Sma-1-6526 | NW_003037791.1 | - | 264134    | 264085    |
| Sma-1-6527 | NW_003037795.1 | + | 1325758   | 1325807   |
| Sma-1-6528 | NW_003037797.1 | + | 1470634   | 1470683   |
| Sma-1-6529 | NW_003037797.1 | - | 1809005   | 1808956   |
| Sma-1-6530 | NW_003037800.1 | - | 524940    | 524891    |
| Sma-1-6531 | NW_003037802.1 | + | 1264698   | 1264747   |
| Sma-1-6532 | NW_003037810.1 | + | 100898    | 100947    |
| Sma-1-6533 | NW_003037837.1 | + | 990274    | 990323    |
| Sma-1-6534 | NW_003037841.1 | - | 2421204   | 2421155   |
| Sma-1-6535 | NW_003037848.1 | - | 566155    | 566106    |
| Sma-1-6536 | NW_003037887.1 | + | 240778    | 240827    |
| Sma-1-6537 | NW_003037888.1 | - | 239719    | 239670    |
| Sma-1-6538 | NW_003037909.1 | - | 606496    | 606447    |
| Sma-1-6539 | NW_003037909.1 | - | 23534     | 23485     |
| Sma-1-6540 | NW_003037942.1 | - | 394559    | 394510    |
| Sma-1-6541 | NW_003037945.1 | - | 680433    | 680384    |
| Sma-1-6542 | NW_003037973.1 | - | 10876     | 10827     |
| Sma-1-6543 | NW_003037975.1 | - | 14924     | 14875     |
| Sma-1-6544 | NW_003037976.1 | + | 621034    | 621083    |
| Sma-1-6545 | NW_003037988.1 | + | 139817    | 139866    |
| Sma-1-6546 | NW_003037997.1 | + | 65026     | 65075     |
| Sma-1-6547 | NW_003038018.1 | + | 359335    | 359384    |
| Sma-1-6548 | NW_003038227.1 | - | 409       | 360       |
| Sma-1-6549 | NW_003039127.1 | - | 2181792   | 2181743   |
| Sma-1-6550 | NW_003038084.1 | + | 216553    | 216602    |
| Sma-1-6551 | NW_003038095.1 | + | 89252     | 89301     |
| Sma-1-6552 | NS_000200.1    | + | 7716641   | 7716690   |
| Sma-1-6553 | NS_000200.1    | + | 11898494  | 11898543  |
| Sma-1-6554 | NS_000200.1    | + | 23267492  | 23267541  |
| Sma-1-6555 | NS_000200.1    | + | 36705420  | 36705469  |
| Sma-1-6556 | NS_000200.1    | + | 77796132  | 77796181  |
| Sma-1-6557 | NS_000200.1    | + | 130704756 | 130704805 |
| Sma-1-6558 | NS_000200.1    | + | 207235349 | 207235398 |

|            |                |   |           |           |
|------------|----------------|---|-----------|-----------|
| Sma-1-6559 | NS_000200.1    | + | 216133635 | 216133684 |
| Sma-1-6560 | NS_000200.1    | + | 220876468 | 220876517 |
| Sma-1-6561 | NS_000200.1    | + | 232760185 | 232760234 |
| Sma-1-6562 | NS_000200.1    | + | 271231797 | 271231846 |
| Sma-1-6563 | NS_000200.1    | + | 274158294 | 274158343 |
| Sma-1-6564 | NS_000200.1    | + | 369493925 | 369493974 |
| Sma-1-6565 | NS_000200.1    | - | 381969562 | 381969513 |
| Sma-1-6566 | NS_000200.1    | - | 310281763 | 310281714 |
| Sma-1-6567 | NS_000200.1    | - | 205597148 | 205597099 |
| Sma-1-6568 | NS_000200.1    | - | 203992603 | 203992554 |
| Sma-1-6569 | NS_000200.1    | - | 189782397 | 189782348 |
| Sma-1-6570 | NS_000200.1    | - | 186154467 | 186154418 |
| Sma-1-6571 | NS_000200.1    | - | 154148145 | 154148096 |
| Sma-1-6572 | NS_000200.1    | - | 153565183 | 153565134 |
| Sma-1-6573 | NS_000200.1    | - | 132448211 | 132448162 |
| Sma-1-6574 | NS_000200.1    | - | 120777716 | 120777667 |
| Sma-1-6575 | NS_000200.1    | - | 115259291 | 115259242 |
| Sma-1-6576 | NS_000200.1    | - | 90259226  | 90259177  |
| Sma-1-6577 | NS_000200.1    | - | 85032385  | 85032336  |
| Sma-1-6578 | NS_000200.1    | - | 19154300  | 19154251  |
| Sma-1-6579 | NS_000200.1    | - | 12236865  | 12236816  |
| Sma-1-6580 | NW_003037898.1 | - | 238963    | 238914    |
| Sma-1-6581 | NW_003037858.1 | - | 118546    | 118497    |
| Sma-1-6582 | NS_000200.1    | - | 144222785 | 144222736 |
| Sma-1-6583 | NS_000200.1    | - | 100782822 | 100782773 |
| Sma-1-6584 | NW_003037901.1 | - | 417600    | 417551    |
| Sma-1-6585 | NS_000200.1    | - | 146266061 | 146266012 |
| Sma-1-6586 | NW_003037827.1 | + | 707185    | 707234    |
| Sma-1-6587 | NS_000200.1    | + | 63329326  | 63329375  |
| Sma-1-6588 | NW_003037826.1 | + | 581114    | 581163    |
| Sma-1-6589 | NS_000200.1    | + | 61580630  | 61580679  |
| Sma-1-6590 | NW_003037796.1 | + | 420054    | 420103    |
| Sma-1-6591 | NS_000200.1    | + | 8629698   | 8629747   |
| Sma-1-6592 | NW_003037062.1 | + | 152       | 201       |
| Sma-1-6593 | NS_000200.1    | + | 343761646 | 343761695 |
| Sma-1-6594 | NW_003038161.1 | - | 558775    | 558726    |
| Sma-1-6595 | NS_000200.1    | - | 297928626 | 297928577 |
| Sma-1-6596 | NW_003026612.1 | + | 26884     | 26933     |
| Sma-1-6597 | NS_000200.1    | + | 312332271 | 312332320 |
| Sma-1-6598 | NW_003032266.1 | - | 20257     | 20208     |
| Sma-1-6599 | NS_000200.1    | - | 358211004 | 358210955 |
| Sma-1-6600 | NW_003037795.1 | + | 986175    | 986224    |
| Sma-1-6601 | NS_000200.1    | + | 7377058   | 7377107   |
| Sma-1-6602 | NW_003026607.1 | + | 135964    | 136013    |
| Sma-1-6603 | NS_000200.1    | + | 308168349 | 308168398 |
| Sma-1-6604 | NW_003026515.1 | + | 164501    | 164550    |
| Sma-1-6605 | NS_000200.1    | + | 290808912 | 290808961 |
| Sma-1-6606 | NW_003037880.1 | - | 593228    | 593179    |
| Sma-1-6607 | NW_003037882.1 | + | 558210    | 558259    |
| Sma-1-6608 | NW_003037975.1 | + | 992341    | 992390    |
| Sma-1-6609 | NW_003026496.1 | - | 21913     | 21864     |
| Sma-1-6610 | NS_000200.1    | + | 125849884 | 125849933 |

|            |                |   |           |           |
|------------|----------------|---|-----------|-----------|
| Sma-1-6611 | NS_000200.1    | + | 206574565 | 206574614 |
| Sma-1-6612 | NS_000200.1    | - | 274558654 | 274558605 |
| Sma-1-6613 | NS_000200.1    | - | 124276786 | 124276737 |
| Sma-1-6614 | NW_003037841.1 | - | 2055881   | 2055832   |
| Sma-1-6615 | NS_000200.1    | - | 84667062  | 84667013  |
| Sma-1-6616 | NW_003037839.1 | + | 329224    | 329273    |
| Sma-1-6617 | NS_000200.1    | + | 79287374  | 79287423  |
| Sma-1-6618 | NW_003037974.1 | + | 135632    | 135681    |
| Sma-1-6619 | NS_000200.1    | + | 204810938 | 204810987 |
| Sma-1-6620 | NW_003038034.1 | + | 279210    | 279259    |
| Sma-1-6621 | NS_000200.1    | + | 247220966 | 247221015 |
| Sma-1-6622 | NW_003037976.1 | + | 215433    | 215482    |
| Sma-1-6623 | NS_000200.1    | + | 206829748 | 206829797 |
| Sma-1-6624 | NW_003038018.1 | + | 694223    | 694272    |
| Sma-1-6625 | NS_000200.1    | + | 233095073 | 233095122 |
| Sma-1-6626 | NW_003034545.1 | + | 766       | 815       |
| Sma-1-6627 | NW_003037954.1 | + | 68198     | 68247     |
| Sma-1-6628 | NS_000200.1    | + | 193297820 | 193297869 |
| Sma-1-6629 | NS_000200.1    | + | 326895707 | 326895756 |
| Sma-1-6630 | NW_003038084.1 | - | 40670     | 40621     |
| Sma-1-6631 | NS_000200.1    | - | 271055914 | 271055865 |
| Sma-1-6632 | NW_003033027.1 | - | 504       | 455       |
| Sma-1-6633 | NW_003037795.1 | + | 1595761   | 1595810   |
| Sma-1-6634 | NW_003037797.1 | + | 1941280   | 1941329   |
| Sma-1-6635 | NW_003037806.1 | - | 350405    | 350356    |
| Sma-1-6636 | NW_003037863.1 | - | 1361104   | 1361055   |
| Sma-1-6637 | NW_003038261.1 | + | 974391    | 974440    |
| Sma-1-6638 | NS_000200.1    | + | 7986644   | 7986693   |
| Sma-1-6639 | NS_000200.1    | + | 12369140  | 12369189  |
| Sma-1-6640 | NS_000200.1    | + | 324588042 | 324588091 |
| Sma-1-6641 | NS_000200.1    | - | 326215324 | 326215275 |
| Sma-1-6642 | NS_000200.1    | - | 108119471 | 108119422 |
| Sma-1-6643 | NS_000200.1    | - | 28545619  | 28545570  |
| Sma-1-6644 | NW_003037916.1 | + | 1178263   | 1178312   |
| Sma-1-6645 | NS_000200.1    | + | 164371674 | 164371723 |
| Sma-1-6646 | NW_003037916.1 | - | 1703750   | 1703701   |
| Sma-1-6647 | NS_000200.1    | - | 164897161 | 164897112 |
| Sma-1-6648 | NW_003037796.1 | - | 76368     | 76319     |
| Sma-1-6649 | NS_000200.1    | - | 8286012   | 8285963   |
| Sma-1-6650 | NW_003026472.1 | + | 68308     | 68357     |
| Sma-1-6651 | NS_000200.1    | + | 236480300 | 236480349 |
| env-84     | AB231864.1     | - | 41943     | 41894     |
| Sma-1-6652 | NW_003022248.1 | + | 2146      | 2195      |
| Sma-1-6653 | NW_003028351.1 | - | 1174      | 1125      |
| Sma-1-6654 | NW_003031306.1 | + | 699       | 748       |
| Sma-1-6655 | NW_003035418.1 | + | 1132      | 1181      |
| Sma-1-6656 | NW_003038253.1 | - | 71982     | 71933     |
| Sma-1-6657 | NW_003037962.1 | + | 550819    | 550868    |
| Sma-1-6658 | NW_003037898.1 | - | 228168    | 228119    |
| Sma-1-6659 | NW_003037794.1 | + | 1859462   | 1859511   |
| Sma-1-6660 | NW_003037809.1 | - | 1823358   | 1823309   |
| Sma-1-6661 | NW_003037819.1 | + | 958856    | 958905    |

|            |                |   |           |           |
|------------|----------------|---|-----------|-----------|
| Sma-1-6662 | NW_003037825.1 | - | 1630713   | 1630664   |
| Sma-1-6663 | NW_003037825.1 | - | 314107    | 314058    |
| Sma-1-6664 | NW_003037836.1 | + | 256643    | 256692    |
| Sma-1-6665 | NW_003037839.1 | + | 251414    | 251463    |
| Sma-1-6666 | NW_003037840.1 | - | 331020    | 330971    |
| Sma-1-6667 | NW_003037843.1 | + | 2347      | 2396      |
| Sma-1-6668 | NW_003037860.1 | + | 280489    | 280538    |
| Sma-1-6669 | NW_003037861.1 | + | 843455    | 843504    |
| Sma-1-6670 | NW_003037895.1 | + | 301682    | 301731    |
| Sma-1-6671 | NW_003037899.1 | + | 17203     | 17252     |
| Sma-1-6672 | NW_003037905.1 | + | 631805    | 631854    |
| Sma-1-6673 | NW_003037905.1 | + | 633772    | 633821    |
| Sma-1-6674 | NW_003037912.1 | + | 1226979   | 1227028   |
| Sma-1-6675 | NW_003037918.1 | + | 1644412   | 1644461   |
| Sma-1-6676 | NW_003037940.1 | + | 394637    | 394686    |
| Sma-1-6677 | NW_003037953.1 | + | 25478     | 25527     |
| Sma-1-6678 | NW_003037956.1 | - | 193368    | 193319    |
| Sma-1-6679 | NW_003037970.1 | + | 499048    | 499097    |
| Sma-1-6680 | NW_003037970.1 | - | 182784    | 182735    |
| Sma-1-6681 | NW_003037980.1 | - | 191412    | 191363    |
| Sma-1-6682 | NW_003037982.1 | + | 930462    | 930511    |
| Sma-1-6683 | NW_003038028.1 | - | 794094    | 794045    |
| Sma-1-6684 | NW_003038259.1 | + | 186439    | 186488    |
| Sma-1-6685 | NW_003026484.1 | + | 15126     | 15175     |
| Sma-1-6686 | NW_003026508.1 | - | 162329    | 162280    |
| Sma-1-6687 | NW_003038068.1 | - | 209871    | 209822    |
| Sma-1-6688 | NS_000200.1    | + | 6039057   | 6039106   |
| Sma-1-6689 | NS_000200.1    | + | 52047121  | 52047170  |
| Sma-1-6690 | NS_000200.1    | + | 75813742  | 75813791  |
| Sma-1-6691 | NS_000200.1    | + | 79209564  | 79209613  |
| Sma-1-6692 | NS_000200.1    | + | 85641654  | 85641703  |
| Sma-1-6693 | NS_000200.1    | + | 104023517 | 104023566 |
| Sma-1-6694 | NS_000200.1    | + | 105619909 | 105619958 |
| Sma-1-6695 | NS_000200.1    | + | 142747884 | 142747933 |
| Sma-1-6696 | NS_000200.1    | + | 144536314 | 144536363 |
| Sma-1-6697 | NS_000200.1    | + | 149900817 | 149900866 |
| Sma-1-6698 | NS_000200.1    | + | 149902784 | 149902833 |
| Sma-1-6699 | NS_000200.1    | + | 158038554 | 158038603 |
| Sma-1-6700 | NS_000200.1    | + | 168211402 | 168211451 |
| Sma-1-6701 | NS_000200.1    | + | 184136767 | 184136816 |
| Sma-1-6702 | NS_000200.1    | + | 192938529 | 192938578 |
| Sma-1-6703 | NS_000200.1    | + | 196627662 | 196627711 |
| Sma-1-6704 | NS_000200.1    | + | 201555238 | 201555287 |
| Sma-1-6705 | NS_000200.1    | + | 214589657 | 214589706 |
| Sma-1-6706 | NS_000200.1    | + | 256977817 | 256977866 |
| Sma-1-6707 | NS_000200.1    | + | 323047038 | 323047087 |
| Sma-1-6708 | NS_000200.1    | + | 345710555 | 345710604 |
| Sma-1-6709 | NS_000200.1    | + | 361014632 | 361014681 |
| Sma-1-6710 | NS_000200.1    | + | 367431900 | 367431949 |
| Sma-1-6711 | NS_000200.1    | - | 369429272 | 369429223 |
| Sma-1-6712 | NS_000200.1    | - | 319389779 | 319389730 |
| Sma-1-6713 | NS_000200.1    | - | 281206943 | 281206894 |

|            |                |   |           |           |
|------------|----------------|---|-----------|-----------|
| Sma-1-6714 | NS_000200.1    | - | 263277079 | 263277030 |
| Sma-1-6715 | NS_000200.1    | - | 242101668 | 242101619 |
| Sma-1-6716 | NS_000200.1    | - | 211152274 | 211152225 |
| Sma-1-6717 | NS_000200.1    | - | 201238974 | 201238925 |
| Sma-1-6718 | NS_000200.1    | - | 194249823 | 194249774 |
| Sma-1-6719 | NS_000200.1    | - | 144211990 | 144211941 |
| Sma-1-6720 | NS_000200.1    | - | 80954344  | 80954295  |
| Sma-1-6721 | NS_000200.1    | - | 60760495  | 60760446  |
| Sma-1-6722 | NS_000200.1    | - | 59443889  | 59443840  |
| Sma-1-6723 | NS_000200.1    | - | 35487822  | 35487773  |
| Sma-1-6724 | NW_003038249.1 | + | 299260    | 299309    |
| Sma-1-6725 | NW_003037972.1 | + | 181731    | 181780    |
| Sma-1-6726 | NS_000200.1    | + | 202657435 | 202657484 |
| Sma-1-6727 | NS_000200.1    | + | 316981513 | 316981562 |
| Sma-1-6728 | NW_003038020.1 | - | 101205    | 101156    |
| Sma-1-6729 | NS_000200.1    | - | 234068549 | 234068500 |
| Sma-1-6730 | NW_003038191.1 | + | 2631      | 2680      |
| Sma-1-6731 | NS_000200.1    | + | 302489816 | 302489865 |
| Sma-1-6732 | NW_003037865.1 | + | 225008    | 225057    |
| Sma-1-6733 | NS_000200.1    | + | 110646927 | 110646976 |
| Sma-1-6734 | NW_003037863.1 | + | 974411    | 974460    |
| Sma-1-6735 | NS_000200.1    | + | 107732778 | 107732827 |
| Sma-1-6736 | NW_003037863.1 | - | 735228    | 735179    |
| Sma-1-6737 | NS_000200.1    | - | 107493595 | 107493546 |
| Sma-1-6738 | NW_003037863.1 | - | 1672325   | 1672276   |
| Sma-1-6739 | NS_000200.1    | - | 108430692 | 108430643 |
| Sma-1-6740 | NW_003037887.1 | + | 1456131   | 1456180   |
| Sma-1-6741 | NS_000200.1    | + | 131920109 | 131920158 |
| Sma-1-6742 | NW_003037887.1 | + | 404044    | 404093    |
| Sma-1-6743 | NS_000200.1    | + | 130868022 | 130868071 |
| Sma-1-6744 | NW_003037861.1 | + | 633620    | 633669    |
| Sma-1-6745 | NW_003037904.1 | + | 129607    | 129656    |
| Sma-1-6746 | NS_000200.1    | + | 105410074 | 105410123 |
| Sma-1-6747 | NS_000200.1    | + | 148844106 | 148844155 |
| Sma-1-6748 | NW_003037888.1 | + | 1179807   | 1179856   |
| Sma-1-6749 | NS_000200.1    | + | 133388299 | 133388348 |
| Sma-1-6750 | NW_003037803.1 | + | 1333237   | 1333286   |
| Sma-1-6751 | NS_000200.1    | + | 24833774  | 24833823  |
| Sma-1-6752 | NW_003037805.1 | + | 1551571   | 1551619   |
| Sma-1-6753 | NS_000200.1    | + | 28109415  | 28109463  |
| Sma-1-6754 | NW_003037939.1 | + | 468650    | 468699    |
| Sma-1-6755 | NW_003038035.1 | + | 60641     | 60690     |
| Sma-1-6756 | NW_003038453.1 | + | 21976     | 22025     |
| Sma-1-6757 | NS_000200.1    | + | 183338404 | 183338453 |
| Sma-1-6758 | NS_000200.1    | + | 247922133 | 247922182 |
| Sma-1-6759 | NS_000200.1    | + | 330603903 | 330603952 |
| Sma-1-6760 | NW_003037809.1 | + | 2644790   | 2644839   |
| Sma-1-6761 | NS_000200.1    | + | 36309254  | 36309303  |
| Sma-1-6762 | NW_003037996.1 | - | 526507    | 526458    |
| Sma-1-6763 | NS_000200.1    | - | 220771383 | 220771334 |
| Sma-1-6764 | NW_003037885.1 | - | 399155    | 399106    |
| Sma-1-6765 | NW_003037940.1 | - | 727135    | 727086    |



|            |                |   |           |           |
|------------|----------------|---|-----------|-----------|
| Sma-1-6766 | NS_000200.1    | - | 184469265 | 184469216 |
| Sma-1-6767 | NS_000200.1    | - | 128497102 | 128497053 |
| Sma-1-6768 | NW_003026465.1 | - | 89600     | 89551     |
| Sma-1-6769 | NS_000200.1    | - | 207482194 | 207482145 |
| Sma-1-6770 | NW_003020818.1 | - | 777       | 728       |
| Sma-1-6771 | NS_000200.1    | - | 364515892 | 364515843 |
| Sma-1-6772 | NW_003038015.1 | + | 507832    | 507881    |
| Sma-1-6773 | NS_000200.1    | + | 230831322 | 230831371 |
| Sma-1-6774 | NW_003038215.1 | + | 143156    | 143205    |
| Sma-1-6775 | NS_000200.1    | + | 306756192 | 306756241 |
| Sma-1-6776 | NW_003038027.1 | + | 320868    | 320917    |
| Sma-1-6777 | NW_003038152.1 | + | 15661     | 15710     |
| Sma-1-6778 | NS_000200.1    | + | 240691582 | 240691631 |
| Sma-1-6779 | NS_000200.1    | + | 292621385 | 292621434 |
| Sma-1-6780 | NW_003038037.1 | - | 1334182   | 1334133   |
| Sma-1-6781 | NS_000200.1    | - | 251489591 | 251489542 |
| Sma-1-6782 | NW_003038150.1 | + | 90191     | 90240     |
| Sma-1-6783 | NW_003038162.1 | + | 279638    | 279687    |
| Sma-1-6784 | NS_000200.1    | + | 291568929 | 291568978 |
| Sma-1-6785 | NS_000200.1    | + | 298225093 | 298225142 |
| Sma-1-6786 | NW_003038254.1 | + | 58204     | 58253     |
| Sma-1-6787 | NS_000200.1    | + | 320093762 | 320093811 |
| Sma-1-6788 | NW_003038215.1 | - | 138355    | 138306    |
| Sma-1-6789 | NW_003035870.1 | - | 50278     | 50229     |
| Sma-1-6790 | NW_003037937.1 | - | 3497      | 3448      |
| Sma-1-6791 | NW_003037795.1 | - | 1368284   | 1368235   |
| Sma-1-6792 | NW_003037817.1 | - | 886290    | 886241    |
| Sma-1-6793 | NW_003037821.1 | - | 696783    | 696734    |
| Sma-1-6794 | NW_003037829.1 | - | 1034772   | 1034723   |
| Sma-1-6795 | NW_003037834.1 | + | 344963    | 345012    |
| Sma-1-6796 | NW_003037863.1 | + | 1501270   | 1501319   |
| Sma-1-6797 | NW_003037881.1 | + | 617391    | 617440    |
| Sma-1-6798 | NW_003037882.1 | - | 539921    | 539872    |
| Sma-1-6799 | NW_003037904.1 | - | 191787    | 191738    |
| Sma-1-6800 | NW_003037968.1 | + | 8936      | 8985      |
| Sma-1-6801 | NW_003038030.1 | - | 186920    | 186871    |
| Sma-1-6802 | NW_003038241.1 | - | 160442    | 160393    |
| Sma-1-6803 | NW_003026507.1 | - | 339434    | 339385    |
| Sma-1-6804 | NW_003038086.1 | + | 357069    | 357118    |
| Sma-1-6805 | NW_003038086.1 | - | 351397    | 351348    |
| Sma-1-6806 | NW_003038087.1 | - | 338388    | 338339    |
| Sma-1-6807 | NS_000200.1    | + | 73505449  | 73505498  |
| Sma-1-6808 | NS_000200.1    | + | 108259637 | 108259686 |
| Sma-1-6809 | NS_000200.1    | + | 125049182 | 125049231 |
| Sma-1-6810 | NS_000200.1    | + | 199926106 | 199926155 |
| Sma-1-6811 | NS_000200.1    | + | 272605662 | 272605711 |
| Sma-1-6812 | NS_000200.1    | - | 335415567 | 335415518 |
| Sma-1-6813 | NS_000200.1    | - | 314623147 | 314623098 |
| Sma-1-6814 | NS_000200.1    | - | 306751391 | 306751342 |
| Sma-1-6815 | NS_000200.1    | - | 279999585 | 279999536 |
| Sma-1-6816 | NS_000200.1    | - | 273366789 | 273366740 |
| Sma-1-6817 | NS_000200.1    | - | 272599990 | 272599941 |

|            |                |   |           |           |
|------------|----------------|---|-----------|-----------|
| Sma-1-6818 | NS_000200.1    | - | 243322787 | 243322738 |
| Sma-1-6819 | NS_000200.1    | - | 181203406 | 181203357 |
| Sma-1-6820 | NS_000200.1    | - | 148906286 | 148906237 |
| Sma-1-6821 | NS_000200.1    | - | 125831595 | 125831546 |
| Sma-1-6822 | NS_000200.1    | - | 66935310  | 66935261  |
| Sma-1-6823 | NS_000200.1    | - | 53841267  | 53841218  |
| Sma-1-6824 | NS_000200.1    | - | 48268642  | 48268593  |
| Sma-1-6825 | NS_000200.1    | - | 7759167   | 7759118   |
| Sma-1-6826 | NW_003037860.1 | - | 277083    | 277034    |
| Sma-1-6827 | NS_000200.1    | - | 104020111 | 104020062 |
| Sma-1-6828 | NW_003037859.1 | - | 160338    | 160289    |
| Sma-1-6829 | NS_000200.1    | - | 102839179 | 102839130 |
| Sma-1-6830 | NW_003026619.1 | + | 188313    | 188362    |
| Sma-1-6831 | NS_000200.1    | + | 322379057 | 322379106 |
| Sma-1-6832 | NW_003037935.1 | - | 220062    | 220013    |
| Sma-1-6833 | NS_000200.1    | - | 179636597 | 179636548 |
| Sma-1-6834 | NW_003037861.1 | + | 643419    | 643468    |
| Sma-1-6835 | NS_000200.1    | + | 105419873 | 105419922 |
| Sma-1-6836 | NW_003037890.1 | + | 1368268   | 1368317   |
| Sma-1-6837 | NS_000200.1    | + | 137051629 | 137051678 |
| Sma-1-6838 | NW_003037853.1 | + | 496648    | 496697    |
| Sma-1-6839 | NS_000200.1    | + | 95988699  | 95988748  |
| Sma-1-6840 | NW_003038033.1 | + | 865997    | 866046    |
| Sma-1-6841 | NS_000200.1    | + | 246845999 | 246846048 |
| Sma-1-6842 | NW_003037950.1 | - | 9123      | 9074      |
| Sma-1-6843 | NW_003037906.1 | + | 385363    | 385412    |
| Sma-1-6844 | NW_003037974.1 | - | 145877    | 145828    |
| Sma-1-6845 | NS_000200.1    | + | 150693142 | 150693191 |
| Sma-1-6846 | NS_000200.1    | - | 204821183 | 204821134 |
| Sma-1-6847 | NS_000200.1    | - | 192408231 | 192408182 |
| Sma-1-6848 | NW_003037914.1 | - | 23048     | 22999     |
| Sma-1-6849 | NS_000200.1    | - | 160167298 | 160167249 |
| Sma-1-6850 | NW_003037845.1 | + | 83198     | 83247     |
| Sma-1-6851 | NW_003037845.1 | - | 79646     | 79597     |
| Sma-1-6852 | NW_003038033.1 | + | 806901    | 806950    |
| Sma-1-6853 | NS_000200.1    | + | 87085101  | 87085150  |
| Sma-1-6854 | NS_000200.1    | + | 246786903 | 246786952 |
| Sma-1-6855 | NS_000200.1    | - | 87081549  | 87081500  |
| Sma-1-6856 | NW_003037852.1 | - | 855768    | 855719    |
| Sma-1-6857 | NS_000200.1    | - | 95247663  | 95247614  |
| Sma-1-6858 | NW_003037814.1 | + | 478178    | 478227    |
| Sma-1-6859 | NS_000200.1    | + | 43462038  | 43462087  |
| Sma-1-6860 | NW_003037908.1 | - | 699459    | 699410    |
| Sma-1-6861 | NS_000200.1    | - | 153172590 | 153172541 |
| Sma-1-6862 | NW_003037890.1 | + | 646246    | 646295    |
| Sma-1-6863 | NS_000200.1    | + | 136329607 | 136329656 |
| Sma-1-6864 | NW_003037904.1 | + | 175191    | 175240    |
| Sma-1-6865 | NS_000200.1    | + | 148889690 | 148889739 |
| Sma-1-6866 | NW_003037859.1 | - | 759160    | 759111    |
| Sma-1-6867 | NS_000200.1    | - | 103438001 | 103437952 |
| Sma-1-6868 | NW_003037850.1 | + | 579442    | 579491    |
| Sma-1-6869 | NW_003037887.1 | + | 641628    | 641677    |

|            |                |   |           |           |
|------------|----------------|---|-----------|-----------|
| Sma-1-6870 | NS_000200.1    | + | 92565472  | 92565521  |
| Sma-1-6871 | NS_000200.1    | + | 131105606 | 131105655 |
| Sma-1-6872 | NW_003037848.1 | + | 688866    | 688915    |
| Sma-1-6873 | NW_003038025.1 | + | 201578    | 201627    |
| Sma-1-6874 | NS_000200.1    | + | 90381937  | 90381986  |
| Sma-1-6875 | NS_000200.1    | + | 239059823 | 239059872 |
| Sma-1-6876 | NW_003037824.1 | + | 568455    | 568504    |
| Sma-1-6877 | NW_003037915.1 | - | 181951    | 181902    |
| Sma-1-6878 | NW_003038035.1 | + | 970172    | 970221    |
| Sma-1-6879 | NS_000200.1    | + | 57499395  | 57499444  |
| Sma-1-6880 | NS_000200.1    | + | 248831664 | 248831713 |
| Sma-1-6881 | NS_000200.1    | - | 162081937 | 162081888 |
| Sma-1-6882 | NW_003037937.1 | + | 426778    | 426827    |
| Sma-1-6883 | NS_000200.1    | + | 181626687 | 181626736 |
| Sma-1-6884 | NW_003037939.1 | + | 327019    | 327068    |
| Sma-1-6885 | NS_000200.1    | + | 183196773 | 183196822 |
| Sma-1-6886 | NW_003038079.1 | + | 215294    | 215343    |
| Sma-1-6887 | NS_000200.1    | + | 268345282 | 268345331 |
| Sma-1-6888 | NW_003026464.1 | - | 555944    | 555895    |
| Sma-1-6889 | NW_003037859.1 | - | 579083    | 579034    |
| Sma-1-6890 | NW_003038224.1 | + | 61131     | 61180     |
| Sma-1-6891 | NS_000200.1    | + | 309472859 | 309472908 |
| Sma-1-6892 | NS_000200.1    | - | 203856253 | 203856204 |
| Sma-1-6893 | NS_000200.1    | - | 103257924 | 103257875 |
| Sma-1-6894 | NW_003026618.1 | + | 38517     | 38566     |
| Sma-1-6895 | NS_000200.1    | + | 321793519 | 321793568 |
| Sma-1-6896 | NW_003037964.1 | + | 557566    | 557615    |
| Sma-1-6897 | NS_000200.1    | + | 198159088 | 198159137 |
| Sma-1-6898 | NW_003037920.1 | + | 276577    | 276626    |
| Sma-1-6899 | NW_003037821.1 | - | 246056    | 246007    |
| Sma-1-6900 | NS_000200.1    | + | 169457384 | 169457433 |
| Sma-1-6901 | NS_000200.1    | - | 53390540  | 53390491  |
| Sma-1-6902 | NW_003038301.1 | + | 766       | 815       |
| Sma-1-6903 | NS_000200.1    | + | 325714070 | 325714119 |
| Sma-1-6904 | NW_003026598.1 | - | 82347     | 82298     |
| Sma-1-6905 | NW_003026606.1 | - | 91929     | 91880     |
| Sma-1-6906 | NW_003037891.1 | + | 1527438   | 1527487   |
| Sma-1-6907 | NW_003038020.1 | + | 134041    | 134090    |
| Sma-1-6908 | NW_003038247.1 | - | 198334    | 198285    |
| Sma-1-6909 | NS_000200.1    | + | 139408716 | 139408765 |
| Sma-1-6910 | NS_000200.1    | + | 234101385 | 234101434 |
| Sma-1-6911 | NS_000200.1    | - | 316147062 | 316147013 |
| Sma-1-6912 | NS_000200.1    | - | 307947622 | 307947573 |
| Sma-1-6913 | NS_000200.1    | - | 305852563 | 305852514 |
| Sma-1-6914 | NW_003037912.1 | + | 654442    | 654491    |
| Sma-1-6915 | NW_003038418.1 | + | 633       | 682       |
| Sma-1-6916 | NW_003038513.1 | + | 7519      | 7568      |
| Sma-1-6917 | NW_003038131.1 | - | 77409     | 77360     |
| Sma-1-6918 | NS_000200.1    | + | 157466017 | 157466066 |
| Sma-1-6919 | NS_000200.1    | + | 328865152 | 328865201 |
| Sma-1-6920 | NS_000200.1    | + | 339016696 | 339016745 |
| Sma-1-6921 | NS_000200.1    | - | 282039253 | 282039204 |

|            |                |   |           |           |
|------------|----------------|---|-----------|-----------|
| Sma-1-6922 | NW_003037914.1 | + | 1231152   | 1231201   |
| Sma-1-6923 | NS_000200.1    | + | 161375402 | 161375451 |
| Sma-1-6924 | NW_003037813.1 | - | 67448     | 67399     |
| Sma-1-6925 | NS_000200.1    | - | 41054311  | 41054262  |
| Sma-1-6926 | NW_003037915.1 | - | 395346    | 395297    |
| Sma-1-6927 | NS_000200.1    | - | 162295332 | 162295283 |
| Sma-1-6928 | NW_003037915.1 | + | 507291    | 507340    |
| Sma-1-6929 | NS_000200.1    | + | 162407277 | 162407326 |
| Sma-1-6930 | NW_003037920.1 | + | 312337    | 312386    |
| Sma-1-6931 | NS_000200.1    | + | 169493144 | 169493193 |
| Sma-1-6932 | NW_003037802.1 | + | 106837    | 106886    |
| Sma-1-6933 | NW_003037822.1 | + | 1296662   | 1296711   |
| Sma-1-6934 | NW_003037822.1 | + | 1440703   | 1440752   |
| Sma-1-6935 | NW_003037822.1 | + | 1450554   | 1450603   |
| Sma-1-6936 | NS_000200.1    | + | 22109631  | 22109680  |
| Sma-1-6937 | NS_000200.1    | + | 55604668  | 55604717  |
| Sma-1-6938 | NS_000200.1    | + | 55748709  | 55748758  |
| Sma-1-6939 | NS_000200.1    | + | 55758560  | 55758609  |
| Sma-1-6940 | NW_003037800.1 | + | 321436    | 321485    |
| Sma-1-6941 | NS_000200.1    | + | 18950796  | 18950845  |
| Sma-1-6942 | NW_003037799.1 | - | 737639    | 737590    |
| Sma-1-6943 | NS_000200.1    | - | 17727993  | 17727944  |
| Sma-1-6944 | NW_003037928.1 | + | 383869    | 383918    |
| Sma-1-6945 | NS_000200.1    | + | 174707822 | 174707871 |
| Sma-1-6946 | NW_003038011.1 | + | 37923     | 37972     |
| Sma-1-6947 | NS_000200.1    | + | 227565573 | 227565622 |
| Sma-1-6948 | NW_003037797.1 | - | 3259384   | 3259335   |
| Sma-1-6949 | NW_003037809.1 | + | 274883    | 274932    |
| Sma-1-6950 | NW_003037829.1 | - | 1007638   | 1007589   |
| Sma-1-6951 | NS_000200.1    | + | 33939347  | 33939396  |
| Sma-1-6952 | NS_000200.1    | - | 66908176  | 66908127  |
| Sma-1-6953 | NS_000200.1    | - | 13687244  | 13687195  |
| Sma-1-6954 | NW_003037972.1 | - | 281455    | 281406    |
| Sma-1-6955 | NS_000200.1    | - | 202757159 | 202757110 |
| Sma-1-6956 | NW_003037977.1 | + | 133445    | 133494    |
| Sma-1-6957 | NW_003037977.1 | - | 144128    | 144079    |
| Sma-1-6958 | NW_003038037.1 | + | 1106181   | 1106230   |
| Sma-1-6959 | NW_003038037.1 | - | 1392281   | 1392232   |
| Sma-1-6960 | NS_000200.1    | + | 208419465 | 208419514 |
| Sma-1-6961 | NS_000200.1    | + | 251261590 | 251261639 |
| Sma-1-6962 | NS_000200.1    | - | 251547690 | 251547641 |
| Sma-1-6963 | NS_000200.1    | - | 208430148 | 208430099 |
| Sma-1-6964 | NW_003038512.1 | + | 305750    | 305799    |
| Sma-1-6965 | NS_000200.1    | + | 338862447 | 338862496 |
| Sma-1-6966 | NW_003037982.1 | + | 830400    | 830449    |
| Sma-1-6967 | NS_000200.1    | + | 214489595 | 214489644 |
| Sma-1-6968 | NW_003037818.1 | + | 1464345   | 1464394   |
| Sma-1-6969 | NW_003037825.1 | - | 694641    | 694592    |
| Sma-1-6970 | NS_000200.1    | + | 50179752  | 50179801  |
| Sma-1-6971 | NS_000200.1    | - | 59824423  | 59824374  |
| Sma-1-6972 | NW_003038086.1 | - | 141944    | 141895    |
| Sma-1-6973 | NS_000200.1    | - | 272390537 | 272390488 |

|            |                |   |           |           |
|------------|----------------|---|-----------|-----------|
| Sma-1-6974 | NW_003038253.1 | - | 47703     | 47654     |
| Sma-1-6975 | NS_000200.1    | - | 319365500 | 319365451 |
| Sma-1-6976 | NW_003038225.1 | - | 120360    | 120311    |
| Sma-1-6977 | NS_000200.1    | - | 309975024 | 309974975 |
| Sma-1-6978 | NW_003038072.1 | + | 224255    | 224304    |
| Sma-1-6979 | NS_000200.1    | + | 265386483 | 265386532 |
| Sma-1-6980 | NW_003038455.1 | - | 60059     | 60010     |
| Sma-1-6981 | NW_003037774.1 | - | 43608     | 43559     |
| Sma-1-6982 | NW_003037797.1 | - | 133995    | 133946    |
| Sma-1-6983 | NW_003037827.1 | - | 131181    | 131132    |
| Sma-1-6984 | NW_003037839.1 | + | 908672    | 908721    |
| Sma-1-6985 | NW_003037852.1 | - | 908819    | 908770    |
| Sma-1-6986 | NW_003038008.1 | + | 337916    | 337965    |
| Sma-1-6987 | NW_003038233.1 | + | 21423     | 21472     |
| Sma-1-6988 | NW_003038083.1 | - | 311078    | 311029    |
| Sma-1-6989 | NW_003038086.1 | + | 142982    | 143031    |
| Sma-1-6990 | NS_000200.1    | + | 79866822  | 79866871  |
| Sma-1-6991 | NS_000200.1    | + | 226011012 | 226011061 |
| Sma-1-6992 | NS_000200.1    | + | 272391575 | 272391624 |
| Sma-1-6993 | NS_000200.1    | + | 312604522 | 312604571 |
| Sma-1-6994 | NS_000200.1    | - | 378628985 | 378628936 |
| Sma-1-6995 | NS_000200.1    | - | 330842110 | 330842061 |
| Sma-1-6996 | NS_000200.1    | - | 270554415 | 270554366 |
| Sma-1-6997 | NS_000200.1    | - | 95300714  | 95300665  |
| Sma-1-6998 | NS_000200.1    | - | 62753322  | 62753273  |
| Sma-1-6999 | NS_000200.1    | - | 10561855  | 10561806  |
| Sma-1-7000 | NW_003038086.1 | - | 142624    | 142575    |
| Sma-1-7001 | NS_000200.1    | - | 272391217 | 272391168 |
| Sma-1-7002 | NW_003026458.1 | + | 498723    | 498772    |
| Sma-1-7003 | NS_000200.1    | + | 102366953 | 102367002 |
| Sma-1-7004 | NW_003038032.1 | + | 372496    | 372545    |
| Sma-1-7005 | NS_000200.1    | + | 245531656 | 245531705 |
| Sma-1-7006 | NW_003037873.1 | - | 543872    | 543823    |
| Sma-1-7007 | NW_003035880.1 | + | 352499    | 352548    |
| Sma-1-7008 | NW_003026611.1 | + | 215586    | 215635    |
| Sma-1-7009 | NW_003037937.1 | - | 606550    | 606501    |
| Sma-1-7010 | NW_003037793.1 | - | 2563942   | 2563893   |
| Sma-1-7011 | NW_003037795.1 | + | 265128    | 265177    |
| Sma-1-7012 | NW_003037799.1 | - | 1252547   | 1252498   |
| Sma-1-7013 | NW_003037819.1 | - | 378254    | 378205    |
| Sma-1-7014 | NW_003037836.1 | - | 447750    | 447701    |
| Sma-1-7015 | NW_003037850.1 | + | 222723    | 222772    |
| Sma-1-7016 | NW_003037853.1 | - | 1003451   | 1003402   |
| Sma-1-7017 | NW_003037861.1 | - | 189604    | 189555    |
| Sma-1-7018 | NW_003037881.1 | + | 452321    | 452370    |
| Sma-1-7019 | NW_003037893.1 | - | 299224    | 299175    |
| Sma-1-7020 | NW_003037903.1 | - | 329083    | 329034    |
| Sma-1-7021 | NW_003037910.1 | + | 1040315   | 1040364   |
| Sma-1-7022 | NW_003037911.1 | - | 370317    | 370268    |
| Sma-1-7023 | NW_003037938.1 | - | 403261    | 403212    |
| Sma-1-7024 | NW_003037938.1 | - | 222356    | 222307    |
| Sma-1-7025 | NW_003038037.1 | + | 693037    | 693086    |

|            |                |   |           |           |
|------------|----------------|---|-----------|-----------|
| Sma-1-7026 | NW_003038037.1 | + | 1723280   | 1723329   |
| Sma-1-7027 | NW_003038261.1 | + | 912048    | 912097    |
| Sma-1-7028 | NW_003038518.1 | + | 629037    | 629086    |
| Sma-1-7029 | NW_003026508.1 | + | 64531     | 64580     |
| Sma-1-7030 | NW_003026517.1 | - | 575960    | 575911    |
| Sma-1-7031 | NW_003038058.1 | + | 327042    | 327091    |
| Sma-1-7032 | NW_003038077.1 | + | 338672    | 338721    |
| Sma-1-7033 | NW_003038084.1 | + | 325948    | 325997    |
| Sma-1-7034 | NS_000200.1    | + | 6656011   | 6656060   |
| Sma-1-7035 | NS_000200.1    | + | 92208753  | 92208802  |
| Sma-1-7036 | NS_000200.1    | + | 124884112 | 124884161 |
| Sma-1-7037 | NS_000200.1    | + | 155552290 | 155552339 |
| Sma-1-7038 | NS_000200.1    | + | 250848446 | 250848495 |
| Sma-1-7039 | NS_000200.1    | + | 251878689 | 251878738 |
| Sma-1-7040 | NS_000200.1    | + | 260158242 | 260158291 |
| Sma-1-7041 | NS_000200.1    | + | 267110312 | 267110361 |
| Sma-1-7042 | NS_000200.1    | + | 271341192 | 271341241 |
| Sma-1-7043 | NS_000200.1    | + | 281109145 | 281109194 |
| Sma-1-7044 | NS_000200.1    | + | 310785370 | 310785419 |
| Sma-1-7045 | NS_000200.1    | + | 324525699 | 324525748 |
| Sma-1-7046 | NS_000200.1    | + | 339593563 | 339593612 |
| Sma-1-7047 | NS_000200.1    | + | 342265870 | 342265919 |
| Sma-1-7048 | NS_000200.1    | - | 300181969 | 300181920 |
| Sma-1-7049 | NS_000200.1    | - | 182440374 | 182440325 |
| Sma-1-7050 | NS_000200.1    | - | 182259469 | 182259420 |
| Sma-1-7051 | NS_000200.1    | - | 181806459 | 181806410 |
| Sma-1-7052 | NS_000200.1    | - | 156157670 | 156157621 |
| Sma-1-7053 | NS_000200.1    | - | 147883164 | 147883115 |
| Sma-1-7054 | NS_000200.1    | - | 141413534 | 141413485 |
| Sma-1-7055 | NS_000200.1    | - | 119283000 | 119282951 |
| Sma-1-7056 | NS_000200.1    | - | 104966058 | 104966009 |
| Sma-1-7057 | NS_000200.1    | - | 96495502  | 96495453  |
| Sma-1-7058 | NS_000200.1    | - | 76004849  | 76004800  |
| Sma-1-7059 | NS_000200.1    | - | 51466519  | 51466470  |
| Sma-1-7060 | NS_000200.1    | - | 18242901  | 18242852  |
| Sma-1-7061 | NS_000200.1    | - | 2563942   | 2563893   |
| Sma-1-7062 | NW_003037793.1 | + | 4026372   | 4026421   |
| Sma-1-7063 | NS_000200.1    | + | 4026372   | 4026421   |
| Sma-1-7064 | NW_003037797.1 | + | 2991336   | 2991385   |
| Sma-1-7065 | NS_000200.1    | + | 13419196  | 13419245  |
| Sma-1-7066 | NW_003037797.1 | + | 1877907   | 1877956   |
| Sma-1-7067 | NW_003037897.1 | + | 376944    | 376993    |
| Sma-1-7068 | NS_000200.1    | + | 12305767  | 12305816  |
| Sma-1-7069 | NS_000200.1    | + | 143859320 | 143859369 |
| Sma-1-7070 | NW_003038020.1 | + | 395067    | 395116    |
| Sma-1-7071 | NW_003038068.1 | + | 125120    | 125169    |
| Sma-1-7072 | NS_000200.1    | + | 234362411 | 234362460 |
| Sma-1-7073 | NS_000200.1    | + | 263192328 | 263192377 |
| Sma-1-7074 | NW_003020691.1 | + | 122       | 171       |
| Sma-1-7075 | NS_000200.1    | + | 360671311 | 360671360 |
| Sma-1-7076 | NW_003037918.1 | + | 432533    | 432582    |
| Sma-1-7077 | NW_003037991.1 | - | 211198    | 211149    |

|            |                |   |           |           |
|------------|----------------|---|-----------|-----------|
| Sma-1-7078 | NS_000200.1    | + | 166999523 | 166999572 |
| Sma-1-7079 | NS_000200.1    | - | 217360766 | 217360717 |
| Sma-1-7080 | NW_003038014.1 | - | 284622    | 284573    |
| Sma-1-7081 | NS_000200.1    | - | 230025311 | 230025262 |
| Sma-1-7082 | NW_003038145.1 | + | 112713    | 112762    |
| Sma-1-7083 | NS_000200.1    | + | 288724136 | 288724185 |
| Sma-1-7084 | NW_003038081.1 | + | 255410    | 255459    |
| Sma-1-7085 | NS_000200.1    | + | 269417453 | 269417502 |
| Sma-1-7086 | NW_003037793.1 | - | 1378920   | 1378871   |
| Sma-1-7087 | NW_003038254.1 | + | 272895    | 272944    |
| Sma-1-7088 | NW_003038254.1 | - | 271504    | 271455    |
| Sma-1-7089 | NW_003038119.1 | - | 192611    | 192562    |
| Sma-1-7090 | NS_000200.1    | + | 320308453 | 320308502 |
| Sma-1-7091 | NS_000200.1    | - | 320307062 | 320307013 |
| Sma-1-7092 | NS_000200.1    | - | 278100167 | 278100118 |
| Sma-1-7093 | NS_000200.1    | - | 1378920   | 1378871   |
| Sma-1-7094 | NW_003032136.1 | - | 1730      | 1681      |
| Sma-1-7095 | NS_000200.1    | - | 378268231 | 378268182 |
| Sma-1-7096 | NW_003037826.1 | + | 341164    | 341213    |
| Sma-1-7097 | NW_003038257.1 | + | 291298    | 291347    |
| Sma-1-7098 | NS_000200.1    | + | 61340680  | 61340729  |
| Sma-1-7099 | NS_000200.1    | + | 321465626 | 321465675 |
| Sma-1-7100 | NW_003037891.1 | - | 1762805   | 1762756   |
| Sma-1-7101 | NS_000200.1    | - | 139644083 | 139644034 |
| Sma-1-7102 | NW_003037938.1 | - | 90146     | 90097     |
| Sma-1-7103 | NW_003037972.1 | - | 337590    | 337541    |
| Sma-1-7104 | NW_003037980.1 | + | 763626    | 763675    |
| Sma-1-7105 | NS_000200.1    | + | 211724488 | 211724537 |
| Sma-1-7106 | NS_000200.1    | - | 202813294 | 202813245 |
| Sma-1-7107 | NS_000200.1    | - | 182127259 | 182127210 |
| Sma-1-7108 | NW_003037798.1 | + | 1251379   | 1251428   |
| Sma-1-7109 | NS_000200.1    | + | 15510537  | 15510586  |
| Sma-1-7110 | NW_003037846.1 | - | 655333    | 655284    |
| Sma-1-7111 | NS_000200.1    | - | 88289903  | 88289854  |
| Sma-1-7112 | NW_003037904.1 | - | 186346    | 186297    |
| Sma-1-7113 | NS_000200.1    | - | 148900845 | 148900796 |
| Sma-1-7114 | NW_003037819.1 | - | 965313    | 965264    |
| Sma-1-7115 | NS_000200.1    | - | 52053578  | 52053529  |
| Sma-1-7116 | NW_003037908.1 | - | 948734    | 948685    |
| Sma-1-7117 | NS_000200.1    | - | 153421865 | 153421816 |
| Sma-1-7118 | NW_003037846.1 | + | 790385    | 790434    |
| Sma-1-7119 | NS_000200.1    | + | 88424955  | 88425004  |
| Sma-1-7120 | NW_003037839.1 | - | 1237578   | 1237529   |
| Sma-1-7121 | NS_000200.1    | - | 80195728  | 80195679  |
| Sma-1-7122 | NW_003037901.1 | - | 330651    | 330602    |
| Sma-1-7123 | NS_000200.1    | - | 146179112 | 146179063 |
| Sma-1-7124 | NW_003037906.1 | + | 732768    | 732817    |
| Sma-1-7125 | NS_000200.1    | + | 151040547 | 151040596 |
| Sma-1-7126 | NW_003037918.1 | + | 1294365   | 1294414   |
| Sma-1-7127 | NS_000200.1    | + | 167861355 | 167861404 |
| Sma-1-7128 | NW_003037807.1 | - | 765166    | 765117    |
| Sma-1-7129 | NS_000200.1    | - | 31026682  | 31026633  |

|            |                |   |           |           |
|------------|----------------|---|-----------|-----------|
| Sma-1-7130 | NW_003037822.1 | - | 1583103   | 1583054   |
| Sma-1-7131 | NW_003037930.1 | + | 262133    | 262182    |
| Sma-1-7132 | NS_000200.1    | + | 176120097 | 176120146 |
| Sma-1-7133 | NS_000200.1    | - | 55891109  | 55891060  |
| Sma-1-7134 | NW_003038041.1 | + | 179299    | 179348    |
| Sma-1-7135 | NS_000200.1    | + | 253846581 | 253846630 |
| Sma-1-7136 | NW_003037836.1 | + | 306141    | 306190    |
| Sma-1-7137 | NS_000200.1    | + | 75863240  | 75863289  |
| Sma-1-7138 | NW_003037833.1 | + | 738130    | 738179    |
| Sma-1-7139 | NS_000200.1    | + | 72929226  | 72929275  |
| Sma-1-7140 | NW_003037903.1 | - | 999270    | 999221    |
| Sma-1-7141 | NS_000200.1    | - | 148553351 | 148553302 |
| Sma-1-7142 | NW_003037832.1 | - | 668133    | 668084    |
| Sma-1-7143 | NW_003037911.1 | + | 306714    | 306763    |
| Sma-1-7144 | NW_003037912.1 | + | 1068892   | 1068941   |
| Sma-1-7145 | NS_000200.1    | + | 156094067 | 156094116 |
| Sma-1-7146 | NS_000200.1    | + | 157880467 | 157880516 |
| Sma-1-7147 | NS_000200.1    | - | 71877564  | 71877515  |
| Sma-1-7148 | NW_003037831.1 | - | 1573312   | 1573263   |
| Sma-1-7149 | NS_000200.1    | - | 71022614  | 71022565  |
| Sma-1-7150 | NW_003037830.1 | - | 184453    | 184404    |
| Sma-1-7151 | NS_000200.1    | - | 68074824  | 68074775  |
| Sma-1-7152 | NW_003037931.1 | - | 44666     | 44617     |
| Sma-1-7153 | NS_000200.1    | - | 176877333 | 176877284 |
| Sma-1-7154 | NW_003038241.1 | + | 13768     | 13817     |
| Sma-1-7155 | NS_000200.1    | + | 314476473 | 314476522 |
| Sma-1-7156 | NW_003026456.1 | + | 103496    | 103545    |
| Sma-1-7157 | NS_000200.1    | + | 58026632  | 58026681  |
| Sma-1-7158 | NW_003037907.1 | + | 280417    | 280466    |
| Sma-1-7159 | NS_000200.1    | + | 151684906 | 151684955 |
| Sma-1-7160 | NW_003038223.1 | + | 63153     | 63202     |
| Sma-1-7161 | NW_003038037.1 | + | 594264    | 594313    |
| Sma-1-7162 | NS_000200.1    | + | 250749673 | 250749722 |
| Sma-1-7163 | NS_000200.1    | + | 309131587 | 309131636 |
| Sma-1-7164 | NW_003026515.1 | - | 117264    | 117215    |
| Sma-1-7165 | NS_000200.1    | - | 290761675 | 290761626 |
| Sma-1-7166 | NW_003037808.1 | - | 777742    | 777693    |
| Sma-1-7167 | NS_000200.1    | - | 32564379  | 32564330  |
| Sma-1-7168 | NW_003037821.1 | + | 437691    | 437740    |
| Sma-1-7169 | NS_000200.1    | + | 53582175  | 53582224  |
| Sma-1-7170 | NW_003037993.1 | - | 183987    | 183938    |
| Sma-1-7171 | NS_000200.1    | - | 218370690 | 218370641 |
| Sma-1-7172 | NW_003037962.1 | - | 429898    | 429849    |
| Sma-1-7173 | NS_000200.1    | - | 196506741 | 196506692 |
| Sma-1-7174 | NW_003037798.1 | - | 1257416   | 1257367   |
| Sma-1-7175 | NS_000200.1    | - | 15516574  | 15516525  |
| Sma-1-7176 | NW_003038068.1 | - | 119541    | 119492    |
| Sma-1-7177 | NS_000200.1    | - | 263186749 | 263186700 |
| Sma-1-7178 | NW_003024325.1 | - | 304       | 255       |
| Sma-1-7179 | NW_003029802.1 | + | 16495     | 16544     |
| Sma-1-7180 | NW_003026624.1 | - | 19970     | 19921     |
| Sma-1-7181 | NW_003037808.1 | + | 568546    | 568595    |



|            |                |   |           |           |
|------------|----------------|---|-----------|-----------|
| Sma-1-7182 | NW_003037810.1 | - | 1237729   | 1237680   |
| Sma-1-7183 | NW_003037890.1 | + | 1327581   | 1327630   |
| Sma-1-7184 | NS_000200.1    | + | 32355183  | 32355232  |
| Sma-1-7185 | NS_000200.1    | + | 137010942 | 137010991 |
| Sma-1-7186 | NS_000200.1    | + | 375823019 | 375823068 |
| Sma-1-7187 | NS_000200.1    | - | 365524062 | 365524013 |
| Sma-1-7188 | NS_000200.1    | - | 324890140 | 324890091 |
| Sma-1-7189 | NS_000200.1    | - | 37842251  | 37842202  |
| Sma-1-7190 | NW_003037935.1 | + | 188540    | 188589    |
| Sma-1-7191 | NS_000200.1    | + | 179605075 | 179605124 |
| Sma-1-7192 | NW_003037816.1 | + | 941166    | 941215    |
| Sma-1-7193 | NW_003037854.1 | - | 1842738   | 1842689   |
| Sma-1-7194 | NS_000200.1    | + | 47150038  | 47150087  |
| Sma-1-7195 | NS_000200.1    | - | 98747159  | 98747110  |
| Sma-1-7196 | NW_003037807.1 | + | 947986    | 948035    |
| Sma-1-7197 | NS_000200.1    | + | 31209502  | 31209551  |
| Sma-1-7198 | NW_003038036.1 | + | 667140    | 667189    |
| Sma-1-7199 | NS_000200.1    | + | 249600992 | 249601041 |
| Sma-1-7200 | NW_003037858.1 | + | 1146748   | 1146797   |
| Sma-1-7201 | NW_003037914.1 | - | 245073    | 245024    |
| Sma-1-7202 | NS_000200.1    | + | 101811024 | 101811073 |
| Sma-1-7203 | NS_000200.1    | - | 160389323 | 160389274 |
| Sma-1-7204 | NW_003037795.1 | - | 485165    | 485116    |
| Sma-1-7205 | NS_000200.1    | - | 6876048   | 6875999   |
| Sma-1-7206 | NW_003037829.1 | - | 749248    | 749199    |
| Sma-1-7207 | NW_003037890.1 | + | 1290543   | 1290592   |
| Sma-1-7208 | NS_000200.1    | + | 136973904 | 136973953 |
| Sma-1-7209 | NS_000200.1    | - | 66649786  | 66649737  |
| Sma-1-7210 | NW_003037942.1 | + | 394842    | 394891    |
| Sma-1-7211 | NS_000200.1    | + | 186154750 | 186154799 |
| Sma-1-7212 | NW_003026490.1 | + | 76910     | 76959     |
| Sma-1-7213 | NS_000200.1    | + | 267708626 | 267708675 |
| Sma-1-7214 | NW_003037941.1 | - | 104386    | 104337    |
| Sma-1-7215 | NS_000200.1    | - | 184838860 | 184838811 |
| Sma-1-7216 | NW_003026464.1 | + | 69346     | 69395     |
| Sma-1-7217 | NS_000200.1    | + | 203369655 | 203369704 |
| Sma-1-7218 | NW_003037995.1 | + | 32573     | 32622     |
| Sma-1-7219 | NW_003038014.1 | - | 357176    | 357127    |
| Sma-1-7220 | NS_000200.1    | + | 219722341 | 219722390 |
| Sma-1-7221 | NS_000200.1    | - | 230097865 | 230097816 |
| Sma-1-7222 | NW_003026458.1 | - | 313070    | 313021    |
| Sma-1-7223 | NW_003037829.1 | + | 1145052   | 1145101   |
| Sma-1-7224 | NW_003037975.1 | + | 182744    | 182793    |
| Sma-1-7225 | NW_003038102.1 | - | 33181     | 33132     |
| Sma-1-7226 | NS_000200.1    | + | 67045590  | 67045639  |
| Sma-1-7227 | NS_000200.1    | + | 205764968 | 205765017 |
| Sma-1-7228 | NS_000200.1    | - | 274712127 | 274712078 |
| Sma-1-7229 | NS_000200.1    | - | 102181300 | 102181251 |
| Sma-1-7230 | NW_003037793.1 | + | 3946332   | 3946381   |
| Sma-1-7231 | NW_003026517.1 | - | 409273    | 409224    |
| Sma-1-7232 | NS_000200.1    | + | 3946332   | 3946381   |
| Sma-1-7233 | NS_000200.1    | - | 300015282 | 300015233 |

|            |                |   |           |           |
|------------|----------------|---|-----------|-----------|
| Sma-1-7234 | NW_003026468.1 | - | 265149    | 265100    |
| Sma-1-7235 | NS_000200.1    | - | 216459170 | 216459121 |
| Sma-1-7236 | NW_003037800.1 | - | 1525362   | 1525313   |
| Sma-1-7237 | NW_003037913.1 | + | 236967    | 237016    |
| Sma-1-7238 | NW_003037913.1 | + | 242051    | 242100    |
| Sma-1-7239 | NW_003037940.1 | - | 899383    | 899334    |
| Sma-1-7240 | NS_000200.1    | + | 158800718 | 158800767 |
| Sma-1-7241 | NS_000200.1    | + | 158805802 | 158805851 |
| Sma-1-7242 | NS_000200.1    | - | 184641513 | 184641464 |
| Sma-1-7243 | NS_000200.1    | - | 20154722  | 20154673  |
| Sma-1-7244 | NW_003037914.1 | - | 1706928   | 1706879   |
| Sma-1-7245 | NS_000200.1    | - | 161851178 | 161851129 |
| Sma-1-7246 | NW_003037816.1 | - | 286404    | 286355    |
| Sma-1-7247 | NS_000200.1    | - | 46495276  | 46495227  |
| Sma-1-7248 | NW_003037915.1 | - | 1199702   | 1199653   |
| Sma-1-7249 | NW_003038152.1 | - | 111986    | 111937    |
| Sma-1-7250 | NS_000200.1    | - | 292717710 | 292717661 |
| Sma-1-7251 | NS_000200.1    | - | 163099688 | 163099639 |
| Sma-1-7252 | NW_003032160.1 | - | 48078     | 48029     |
| Sma-1-7253 | NS_000200.1    | - | 381056164 | 381056115 |
| Sma-1-7254 | NW_003037792.1 | + | 235696    | 235745    |
| Sma-1-7255 | NS_000200.1    | + | 382673040 | 382673089 |
| Sma-1-7256 | NW_003037810.1 | - | 1210610   | 1210561   |
| Sma-1-7257 | NW_003037849.1 | + | 397443    | 397492    |
| Sma-1-7258 | NW_003037889.1 | + | 918748    | 918797    |
| Sma-1-7259 | NW_003038148.1 | + | 401719    | 401768    |
| Sma-1-7260 | NS_000200.1    | + | 91373716  | 91373765  |
| Sma-1-7261 | NS_000200.1    | + | 134695238 | 134695287 |
| Sma-1-7262 | NS_000200.1    | + | 290475703 | 290475752 |
| Sma-1-7263 | NS_000200.1    | - | 37815132  | 37815083  |
| Sma-1-7264 | NW_003037812.1 | - | 930666    | 930617    |
| Sma-1-7265 | NS_000200.1    | - | 40413405  | 40413356  |
| Sma-1-7266 | NW_003037917.1 | + | 626803    | 626852    |
| Sma-1-7267 | NS_000200.1    | + | 165663607 | 165663656 |
| Sma-1-7268 | NW_003038150.1 | + | 6304      | 6353      |
| Sma-1-7269 | NS_000200.1    | + | 291485042 | 291485091 |
| Sma-1-7270 | NW_003026605.1 | - | 21011     | 20962     |
| Sma-1-7271 | NS_000200.1    | - | 307699875 | 307699826 |
| Sma-1-7272 | NW_003031852.1 | + | 168       | 217       |
| Sma-1-7273 | NW_003037966.1 | + | 448507    | 448556    |
| Sma-1-7274 | NW_003026515.1 | - | 34934     | 34885     |
| Sma-1-7275 | NW_003038157.1 | - | 119871    | 119822    |
| Sma-1-7276 | NS_000200.1    | + | 199150370 | 199150419 |
| Sma-1-7277 | NS_000200.1    | + | 367147433 | 367147482 |
| Sma-1-7278 | NS_000200.1    | - | 295370791 | 295370742 |
| Sma-1-7279 | NS_000200.1    | - | 290679345 | 290679296 |
| Sma-1-7280 | NW_003037829.1 | + | 1149315   | 1149364   |
| Sma-1-7281 | NS_000200.1    | + | 67049853  | 67049902  |
| Sma-1-7282 | NW_003037916.1 | - | 143377    | 143328    |
| Sma-1-7283 | NS_000200.1    | - | 163336788 | 163336739 |
| Sma-1-7284 | NW_003037806.1 | - | 51031     | 50982     |
| Sma-1-7285 | NS_000200.1    | - | 28246245  | 28246196  |

|            |                |   |           |           |
|------------|----------------|---|-----------|-----------|
| Sma-1-7286 | NW_003037806.1 | - | 1458001   | 1457952   |
| Sma-1-7287 | NW_003038024.1 | + | 583764    | 583813    |
| Sma-1-7288 | NS_000200.1    | + | 238480793 | 238480842 |
| Sma-1-7289 | NS_000200.1    | - | 29653215  | 29653166  |
| Sma-1-7290 | NW_003026472.1 | - | 112829    | 112780    |
| Sma-1-7291 | NW_003038131.1 | + | 111507    | 111556    |
| Sma-1-7292 | NS_000200.1    | + | 282073351 | 282073400 |
| Sma-1-7293 | NS_000200.1    | - | 236524821 | 236524772 |
| Sma-1-7294 | NW_003038235.1 | + | 46922     | 46971     |
| Sma-1-7295 | NW_003038161.1 | + | 414496    | 414545    |
| Sma-1-7296 | NS_000200.1    | + | 297784347 | 297784396 |
| Sma-1-7297 | NS_000200.1    | + | 313112513 | 313112562 |
| Sma-1-7298 | NW_003038070.1 | + | 454343    | 454392    |
| Sma-1-7299 | NW_003037889.1 | + | 954550    | 954599    |
| Sma-1-7300 | NW_003038050.1 | - | 189913    | 189864    |
| Sma-1-7301 | NS_000200.1    | + | 134731040 | 134731089 |
| Sma-1-7302 | NS_000200.1    | + | 264791584 | 264791633 |
| Sma-1-7303 | NS_000200.1    | - | 256464807 | 256464758 |
| Sma-1-7304 | NW_003035655.1 | + | 3282      | 3331      |
| Sma-1-7305 | NS_000200.1    | + | 330513880 | 330513929 |
| Sma-1-7306 | NW_003037930.1 | - | 580491    | 580442    |
| Sma-1-7307 | NS_000200.1    | - | 176438455 | 176438406 |
| Sma-1-7308 | NW_003037930.1 | - | 614210    | 614161    |
| Sma-1-7309 | NS_000200.1    | - | 176472174 | 176472125 |
| Sma-1-7310 | NW_003037930.1 | - | 799674    | 799625    |
| Sma-1-7311 | NW_003038035.1 | - | 189913    | 189864    |
| Sma-1-7312 | NS_000200.1    | - | 248051405 | 248051356 |
| Sma-1-7313 | NS_000200.1    | - | 176657638 | 176657589 |
| Sma-1-7314 | NW_003037932.1 | - | 507622    | 507573    |
| Sma-1-7315 | NS_000200.1    | - | 178040818 | 178040769 |
| Sma-1-7316 | NW_003037797.1 | + | 1606349   | 1606398   |
| Sma-1-7317 | NS_000200.1    | + | 12034209  | 12034258  |
| Sma-1-7318 | NW_003037992.1 | - | 139248    | 139199    |
| Sma-1-7319 | NS_000200.1    | - | 217980729 | 217980680 |
| Sma-1-7320 | NW_003037585.1 | + | 5033      | 5082      |
| Sma-1-7321 | NW_003038037.1 | - | 1682491   | 1682442   |
| Sma-1-7322 | NS_000200.1    | + | 372526204 | 372526253 |
| Sma-1-7323 | NS_000200.1    | - | 251837900 | 251837851 |
| Sma-1-7324 | NW_003038029.1 | + | 763003    | 763052    |
| Sma-1-7325 | NS_000200.1    | + | 242963904 | 242963953 |
| Sma-1-7326 | NW_003038157.1 | + | 280288    | 280337    |
| Sma-1-7327 | NS_000200.1    | + | 295531208 | 295531257 |
| Sma-1-7328 | NW_003037891.1 | + | 2447183   | 2447232   |
| Sma-1-7329 | NW_003037902.1 | - | 380167    | 380118    |
| Sma-1-7330 | NW_003037913.1 | + | 1471773   | 1471822   |
| Sma-1-7331 | NW_003037915.1 | - | 1093621   | 1093572   |
| Sma-1-7332 | NW_003038161.1 | - | 238708    | 238659    |
| Sma-1-7333 | NS_000200.1    | + | 140328461 | 140328510 |
| Sma-1-7334 | NS_000200.1    | + | 160035524 | 160035573 |
| Sma-1-7335 | NS_000200.1    | - | 297608559 | 297608510 |
| Sma-1-7336 | NS_000200.1    | - | 162993607 | 162993558 |
| Sma-1-7337 | NS_000200.1    | - | 147135401 | 147135352 |

|            |                |   |           |           |
|------------|----------------|---|-----------|-----------|
| Sma-1-7338 | NW_003037933.1 | - | 45824     | 45775     |
| Sma-1-7339 | NS_000200.1    | - | 178458996 | 178458947 |
| Sma-1-7340 | NW_003037788.1 | + | 204190    | 204239    |
| Sma-1-7341 | NS_000200.1    | + | 380651428 | 380651477 |
| Sma-1-7342 | NW_003038003.1 | + | 360088    | 360137    |
| Sma-1-7343 | NS_000200.1    | + | 223859370 | 223859419 |
| Sma-1-7344 | NW_003038023.1 | + | 256760    | 256809    |
| Sma-1-7345 | NS_000200.1    | + | 237417051 | 237417100 |
| Sma-1-7346 | NW_003038033.1 | - | 393517    | 393468    |
| Sma-1-7347 | NW_003026510.1 | + | 80612     | 80661     |
| Sma-1-7348 | NS_000200.1    | + | 283520793 | 283520842 |
| Sma-1-7349 | NS_000200.1    | - | 246373519 | 246373470 |
| Sma-1-7350 | NW_003038037.1 | + | 1194181   | 1194230   |
| Sma-1-7351 | NS_000200.1    | + | 251349590 | 251349639 |
| Sma-1-7352 | NW_003037795.1 | - | 206588    | 206539    |
| Sma-1-7353 | NS_000200.1    | - | 6597471   | 6597422   |
| Sma-1-7354 | NW_003037851.1 | - | 507217    | 507168    |
| Sma-1-7355 | NW_003037891.1 | + | 2571087   | 2571136   |
| Sma-1-7356 | NS_000200.1    | + | 140452365 | 140452414 |
| Sma-1-7357 | NS_000200.1    | - | 93910527  | 93910478  |
| Sma-1-7358 | NW_003038146.1 | - | 294504    | 294455    |
| Sma-1-7359 | NS_000200.1    | - | 289275174 | 289275125 |
| Sma-1-7360 | NW_003038214.1 | + | 65286     | 65335     |
| Sma-1-7361 | NW_003038112.1 | - | 71043     | 70994     |
| Sma-1-7362 | NS_000200.1    | + | 306604922 | 306604971 |
| Sma-1-7363 | NS_000200.1    | - | 276526221 | 276526172 |
| Sma-1-7364 | NW_003037937.1 | - | 233216    | 233167    |
| Sma-1-7365 | NW_003037863.1 | - | 999591    | 999542    |
| Sma-1-7366 | NS_000200.1    | - | 181433125 | 181433076 |
| Sma-1-7367 | NS_000200.1    | - | 107757958 | 107757909 |
| Sma-1-7368 | NW_003038045.1 | - | 52041     | 51992     |
| Sma-1-7369 | NS_000200.1    | - | 254829652 | 254829603 |
| Sma-1-7370 | NW_003037938.1 | + | 15735     | 15784     |
| Sma-1-7371 | NS_000200.1    | + | 182052848 | 182052897 |
| Sma-1-7372 | NW_003037938.1 | + | 324614    | 324663    |
| Sma-1-7373 | NS_000200.1    | + | 182361727 | 182361776 |
| Sma-1-7374 | NW_003026510.1 | + | 317576    | 317625    |
| Sma-1-7375 | NS_000200.1    | + | 283757757 | 283757806 |
| Sma-1-7376 | NW_003026465.1 | - | 52778     | 52729     |
| Sma-1-7377 | NS_000200.1    | - | 207445372 | 207445323 |
| Sma-1-7378 | NW_003037819.1 | + | 740123    | 740172    |
| Sma-1-7379 | NW_003037964.1 | + | 451460    | 451509    |
| Sma-1-7380 | NS_000200.1    | + | 51828388  | 51828437  |
| Sma-1-7381 | NS_000200.1    | + | 198052982 | 198053031 |
| Sma-1-7382 | NW_003037941.1 | - | 473047    | 472998    |
| Sma-1-7383 | NS_000200.1    | - | 185207521 | 185207472 |
| Sma-1-7384 | NW_003037941.1 | + | 959379    | 959428    |
| Sma-1-7385 | NS_000200.1    | + | 185693853 | 185693902 |
| Sma-1-7386 | NW_003037944.1 | - | 522340    | 522291    |
| Sma-1-7387 | NS_000200.1    | - | 188743693 | 188743644 |
| Sma-1-7388 | NW_003037973.1 | - | 545782    | 545733    |
| Sma-1-7389 | NS_000200.1    | - | 204527509 | 204527460 |

|            |                |   |           |           |
|------------|----------------|---|-----------|-----------|
| Sma-1-7390 | NW_003026517.1 | + | 331383    | 331432    |
| Sma-1-7391 | NS_000200.1    | + | 299937392 | 299937441 |
| Sma-1-7392 | NW_003021666.1 | + | 1709      | 1758      |
| Sma-1-7393 | NW_003031162.1 | - | 152       | 103       |
| Sma-1-7394 | NW_003033991.1 | + | 2362      | 2411      |
| Sma-1-7395 | NW_003038249.1 | - | 87788     | 87739     |
| Sma-1-7396 | NW_003037793.1 | + | 3190615   | 3190664   |
| Sma-1-7397 | NW_003037797.1 | - | 3397989   | 3397940   |
| Sma-1-7398 | NW_003037797.1 | - | 534863    | 534814    |
| Sma-1-7399 | NW_003037817.1 | - | 507803    | 507754    |
| Sma-1-7400 | NW_003037830.1 | + | 403644    | 403693    |
| Sma-1-7401 | NW_003037831.1 | + | 260453    | 260502    |
| Sma-1-7402 | NW_003037864.1 | + | 484344    | 484393    |
| Sma-1-7403 | NW_003037885.1 | - | 381206    | 381157    |
| Sma-1-7404 | NW_003037896.1 | + | 76319     | 76368     |
| Sma-1-7405 | NW_003038037.1 | - | 511068    | 511019    |
| Sma-1-7406 | NW_003038038.1 | - | 90811     | 90762     |
| Sma-1-7407 | NW_003038115.1 | - | 34912     | 34863     |
| Sma-1-7408 | NW_003038148.1 | - | 103696    | 103647    |
| Sma-1-7409 | NS_000200.1    | + | 3190615   | 3190664   |
| Sma-1-7410 | NS_000200.1    | + | 68294015  | 68294064  |
| Sma-1-7411 | NS_000200.1    | + | 69709755  | 69709804  |
| Sma-1-7412 | NS_000200.1    | + | 108976918 | 108976967 |
| Sma-1-7413 | NS_000200.1    | + | 142996742 | 142996791 |
| Sma-1-7414 | NS_000200.1    | + | 348263849 | 348263898 |
| Sma-1-7415 | NS_000200.1    | + | 363370158 | 363370207 |
| Sma-1-7416 | NS_000200.1    | - | 325880893 | 325880844 |
| Sma-1-7417 | NS_000200.1    | - | 316770041 | 316769992 |
| Sma-1-7418 | NS_000200.1    | - | 290177680 | 290177631 |
| Sma-1-7419 | NS_000200.1    | - | 277090207 | 277090158 |
| Sma-1-7420 | NS_000200.1    | - | 251994204 | 251994155 |
| Sma-1-7421 | NS_000200.1    | - | 250666477 | 250666428 |
| Sma-1-7422 | NS_000200.1    | - | 128479153 | 128479104 |
| Sma-1-7423 | NS_000200.1    | - | 47890155  | 47890106  |
| Sma-1-7424 | NS_000200.1    | - | 13825849  | 13825800  |
| Sma-1-7425 | NS_000200.1    | - | 10962723  | 10962674  |
| Sma-1-7426 | NW_003026460.1 | + | 394406    | 394455    |
| Sma-1-7427 | NW_003037884.1 | - | 78031     | 77982     |
| Sma-1-7428 | NS_000200.1    | + | 170916612 | 170916661 |
| Sma-1-7429 | NS_000200.1    | - | 126857696 | 126857647 |
| Sma-1-7430 | NW_003028350.1 | + | 931       | 980       |
| Sma-1-7431 | NW_003028670.1 | + | 36        | 85        |
| Sma-1-7432 | NW_003038044.1 | - | 125039    | 124990    |
| Sma-1-7433 | NS_000200.1    | + | 369427731 | 369427780 |
| Sma-1-7434 | NS_000200.1    | + | 374852193 | 374852242 |
| Sma-1-7435 | NS_000200.1    | - | 254749821 | 254749772 |
| Sma-1-7436 | NW_003038161.1 | + | 476772    | 476821    |
| Sma-1-7437 | NS_000200.1    | + | 297846623 | 297846672 |
| Sma-1-7438 | NW_003038268.1 | + | 8081      | 8130      |
| Sma-1-7439 | NS_000200.1    | + | 324905392 | 324905441 |
| Sma-1-7440 | NW_003037970.1 | + | 343654    | 343703    |
| Sma-1-7441 | NS_000200.1    | + | 201399844 | 201399893 |

|            |                |   |           |           |
|------------|----------------|---|-----------|-----------|
| Sma-1-7442 | NW_003037970.1 | + | 410759    | 410808    |
| Sma-1-7443 | NS_000200.1    | + | 201466949 | 201466998 |
| Sma-1-7444 | NW_003038120.1 | - | 104212    | 104163    |
| Sma-1-7445 | NS_000200.1    | - | 278289435 | 278289386 |
| Sma-1-7446 | NW_003024095.1 | + | 429       | 478       |
| Sma-1-7447 | NW_003026456.1 | - | 420693    | 420644    |
| Sma-1-7448 | NW_003037890.1 | + | 392054    | 392103    |
| Sma-1-7449 | NS_000200.1    | + | 136075415 | 136075464 |
| Sma-1-7450 | NS_000200.1    | + | 348355156 | 348355205 |
| Sma-1-7451 | NS_000200.1    | - | 58343829  | 58343780  |
| Sma-1-7452 | NW_003037940.1 | + | 226281    | 226330    |
| Sma-1-7453 | NS_000200.1    | + | 183968411 | 183968460 |
| Sma-1-7454 | NW_003033027.1 | - | 3893      | 3844      |
| Sma-1-7455 | NS_000200.1    | - | 326218713 | 326218664 |
| Sma-1-7456 | NW_003037922.1 | - | 60559     | 60510     |
| Sma-1-7457 | NS_000200.1    | - | 169984556 | 169984507 |
| Sma-1-7458 | NW_003037807.1 | + | 1439677   | 1439726   |
| Sma-1-7459 | NS_000200.1    | + | 31701193  | 31701242  |
| Sma-1-7460 | NW_003035869.1 | - | 119157    | 119108    |
| Sma-1-7461 | NS_000200.1    | - | 335303357 | 335303308 |
| Sma-1-7462 | NW_003037817.1 | + | 885254    | 885303    |
| Sma-1-7463 | NW_003037890.1 | + | 920948    | 920997    |
| Sma-1-7464 | NS_000200.1    | + | 48267606  | 48267655  |
| Sma-1-7465 | NS_000200.1    | + | 136604309 | 136604358 |
| Sma-1-7466 | NW_003037797.1 | + | 2536828   | 2536877   |
| Sma-1-7467 | NS_000200.1    | + | 12964688  | 12964737  |
| Sma-1-7468 | NW_003038070.1 | + | 97961     | 98010     |
| Sma-1-7469 | NS_000200.1    | + | 264435202 | 264435251 |
| Sma-1-7470 | NW_003037809.1 | - | 1006202   | 1006153   |
| Sma-1-7471 | NS_000200.1    | - | 34670666  | 34670617  |
| Sma-1-7472 | NW_003038029.1 | - | 773293    | 773244    |
| Sma-1-7473 | NS_000200.1    | - | 242974194 | 242974145 |
| Sma-1-7474 | NW_003038462.1 | + | 45702     | 45751     |
| Sma-1-7475 | NS_000200.1    | + | 331413365 | 331413414 |
| Sma-1-7476 | NW_003032613.1 | + | 1524      | 1573      |
| Sma-1-7477 | NW_003026460.1 | - | 137023    | 136974    |
| Sma-1-7478 | NW_003037804.1 | + | 880703    | 880752    |
| Sma-1-7479 | NW_003037831.1 | - | 1137528   | 1137479   |
| Sma-1-7480 | NW_003037956.1 | + | 153446    | 153495    |
| Sma-1-7481 | NW_003038036.1 | - | 432741    | 432692    |
| Sma-1-7482 | NS_000200.1    | + | 26020723  | 26020772  |
| Sma-1-7483 | NS_000200.1    | + | 194209901 | 194209950 |
| Sma-1-7484 | NS_000200.1    | + | 350423653 | 350423702 |
| Sma-1-7485 | NS_000200.1    | - | 249366593 | 249366544 |
| Sma-1-7486 | NS_000200.1    | - | 170659229 | 170659180 |
| Sma-1-7487 | NS_000200.1    | - | 70586830  | 70586781  |
| Sma-1-7488 | NW_003037767.1 | - | 38494     | 38445     |
| Sma-1-7489 | NW_003037910.1 | + | 1169986   | 1170035   |
| Sma-1-7490 | NS_000200.1    | + | 155681961 | 155682010 |
| Sma-1-7491 | NS_000200.1    | - | 378086374 | 378086325 |
| Sma-1-7492 | NW_003026464.1 | - | 637409    | 637360    |
| Sma-1-7493 | NW_003038219.1 | - | 79273     | 79224     |

|            |                |   |           |           |
|------------|----------------|---|-----------|-----------|
| Sma-1-7494 | NW_003038149.1 | - | 169810    | 169761    |
| Sma-1-7495 | NS_000200.1    | - | 308259694 | 308259645 |
| Sma-1-7496 | NS_000200.1    | - | 291198423 | 291198374 |
| Sma-1-7497 | NS_000200.1    | - | 203937718 | 203937669 |
| Sma-1-7498 | NW_003037944.1 | - | 180377    | 180329    |
| Sma-1-7499 | NS_000200.1    | - | 188401730 | 188401682 |
| Sma-1-7500 | NW_003034207.1 | - | 394       | 345       |
| Sma-1-7501 | NW_003037797.1 | - | 2506829   | 2506780   |
| Sma-1-7502 | NS_000200.1    | - | 326536375 | 326536326 |
| Sma-1-7503 | NS_000200.1    | - | 12934689  | 12934640  |
| Sma-1-7504 | NW_003020180.1 | + | 97        | 146       |
| Sma-1-7505 | NS_000200.1    | + | 371147048 | 371147097 |
| Sma-1-7506 | NW_003027814.1 | - | 585       | 536       |
| Sma-1-7507 | NW_003030818.1 | - | 920       | 871       |
| Sma-1-7508 | NW_003037815.1 | - | 350383    | 350334    |
| Sma-1-7509 | NW_003037935.1 | + | 536411    | 536460    |
| Sma-1-7510 | NW_003037938.1 | + | 170144    | 170193    |
| Sma-1-7511 | NW_003038077.1 | - | 107313    | 107264    |
| Sma-1-7512 | NS_000200.1    | + | 179952946 | 179952995 |
| Sma-1-7513 | NS_000200.1    | + | 182207257 | 182207306 |
| Sma-1-7514 | NS_000200.1    | - | 370309964 | 370309915 |
| Sma-1-7515 | NS_000200.1    | - | 365975909 | 365975860 |
| Sma-1-7516 | NS_000200.1    | - | 266878953 | 266878904 |
| Sma-1-7517 | NS_000200.1    | - | 45613374  | 45613325  |
| Sma-1-7518 | NW_003038020.1 | + | 255693    | 255742    |
| Sma-1-7519 | NS_000200.1    | + | 234223037 | 234223086 |
| Sma-1-7520 | NW_003038042.1 | + | 165123    | 165172    |
| Sma-1-7521 | NS_000200.1    | + | 254110722 | 254110771 |
| Sma-1-7522 | NW_003037925.1 | - | 103245    | 103196    |
| Sma-1-7523 | NS_000200.1    | - | 172505248 | 172505199 |
| Sma-1-7524 | NW_003037793.1 | + | 239541    | 239590    |
| Sma-1-7525 | NW_003037830.1 | + | 1454973   | 1455022   |
| Sma-1-7526 | NW_003037841.1 | - | 1970714   | 1970665   |
| Sma-1-7527 | NS_000200.1    | + | 239541    | 239590    |
| Sma-1-7528 | NS_000200.1    | + | 69345344  | 69345393  |
| Sma-1-7529 | NS_000200.1    | - | 84581895  | 84581846  |
| Sma-1-7530 | NW_003037958.1 | - | 382050    | 382001    |
| Sma-1-7531 | NS_000200.1    | - | 195046234 | 195046185 |
| Sma-1-7532 | NW_003038067.1 | - | 145777    | 145728    |
| Sma-1-7533 | NS_000200.1    | - | 262999830 | 262999781 |
| Sma-1-7534 | NW_003038065.1 | + | 292645    | 292694    |
| Sma-1-7535 | NS_000200.1    | + | 262444262 | 262444311 |
| Sma-1-7536 | NW_003037803.1 | - | 36889     | 36840     |
| Sma-1-7537 | NW_003037882.1 | + | 189429    | 189478    |
| Sma-1-7538 | NW_003037967.1 | - | 492200    | 492151    |
| Sma-1-7539 | NW_003038111.1 | + | 39303     | 39352     |
| Sma-1-7540 | NW_003038130.1 | - | 244785    | 244736    |
| Sma-1-7541 | NS_000200.1    | + | 125481103 | 125481152 |
| Sma-1-7542 | NS_000200.1    | + | 276359066 | 276359115 |
| Sma-1-7543 | NS_000200.1    | - | 281799771 | 281799722 |
| Sma-1-7544 | NS_000200.1    | - | 199732171 | 199732122 |
| Sma-1-7545 | NS_000200.1    | - | 23537426  | 23537377  |

|            |                |   |           |           |
|------------|----------------|---|-----------|-----------|
| Sma-1-7546 | NW_003038152.1 | - | 163377    | 163328    |
| Sma-1-7547 | NS_000200.1    | - | 292769101 | 292769052 |
| Sma-1-7548 | NW_003037975.1 | - | 366471    | 366422    |
| Sma-1-7549 | NW_003037980.1 | - | 1134535   | 1134486   |
| Sma-1-7550 | NS_000200.1    | - | 212095397 | 212095348 |
| Sma-1-7551 | NS_000200.1    | - | 205948695 | 205948646 |
| Sma-1-7552 | NW_003037962.1 | + | 120534    | 120583    |
| Sma-1-7553 | NW_003037847.1 | - | 1003576   | 1003527   |
| Sma-1-7554 | NS_000200.1    | + | 196197377 | 196197426 |
| Sma-1-7555 | NS_000200.1    | - | 89655306  | 89655257  |
| Sma-1-7556 | NW_003037993.1 | - | 203666    | 203617    |
| Sma-1-7557 | NS_000200.1    | - | 218390369 | 218390320 |
| Sma-1-7558 | NW_003037796.1 | - | 415100    | 415051    |
| Sma-1-7559 | NW_003037861.1 | + | 318177    | 318226    |
| Sma-1-7560 | NS_000200.1    | + | 105094631 | 105094680 |
| Sma-1-7561 | NS_000200.1    | - | 8624744   | 8624695   |
| Sma-1-7562 | NW_003024449.1 | + | 42        | 91        |
| Sma-1-7563 | NS_000200.1    | + | 365761512 | 365761561 |
| Sma-1-7564 | NW_003038002.1 | - | 142474    | 142425    |
| Sma-1-7565 | NW_003026616.1 | + | 188457    | 188506    |
| Sma-1-7566 | NW_003037796.1 | + | 1025047   | 1025096   |
| Sma-1-7567 | NW_003037825.1 | + | 1390419   | 1390468   |
| Sma-1-7568 | NW_003037837.1 | - | 460770    | 460721    |
| Sma-1-7569 | NW_003037883.1 | + | 316720    | 316769    |
| Sma-1-7570 | NW_003037903.1 | - | 417220    | 417171    |
| Sma-1-7571 | NW_003037975.1 | + | 749069    | 749118    |
| Sma-1-7572 | NW_003037979.1 | - | 702673    | 702624    |
| Sma-1-7573 | NW_003037994.1 | + | 281697    | 281746    |
| Sma-1-7574 | NW_003026481.1 | - | 157619    | 157570    |
| Sma-1-7575 | NW_003038083.1 | + | 448099    | 448148    |
| Sma-1-7576 | NW_003038150.1 | + | 166112    | 166161    |
| Sma-1-7577 | NW_003038155.1 | + | 482128    | 482177    |
| Sma-1-7578 | NS_000200.1    | + | 9234691   | 9234740   |
| Sma-1-7579 | NS_000200.1    | + | 60520201  | 60520250  |
| Sma-1-7580 | NS_000200.1    | + | 126380443 | 126380492 |
| Sma-1-7581 | NS_000200.1    | + | 206331293 | 206331342 |
| Sma-1-7582 | NS_000200.1    | + | 218813511 | 218813560 |
| Sma-1-7583 | NS_000200.1    | + | 270691436 | 270691485 |
| Sma-1-7584 | NS_000200.1    | + | 291644850 | 291644899 |
| Sma-1-7585 | NS_000200.1    | + | 294605246 | 294605295 |
| Sma-1-7586 | NS_000200.1    | + | 317545056 | 317545105 |
| Sma-1-7587 | NS_000200.1    | - | 255557603 | 255557554 |
| Sma-1-7588 | NS_000200.1    | - | 223262683 | 223262634 |
| Sma-1-7589 | NS_000200.1    | - | 210763693 | 210763644 |
| Sma-1-7590 | NS_000200.1    | - | 147971301 | 147971252 |
| Sma-1-7591 | NS_000200.1    | - | 77266628  | 77266579  |
| Sma-1-7592 | NW_003022382.1 | + | 1496      | 1545      |
| Sma-1-7593 | NW_003037896.1 | - | 156215    | 156166    |
| Sma-1-7594 | NW_003037917.1 | + | 1379398   | 1379447   |
| Sma-1-7595 | NS_000200.1    | + | 166416202 | 166416251 |
| Sma-1-7596 | NS_000200.1    | + | 364839817 | 364839866 |
| Sma-1-7597 | NS_000200.1    | - | 143076638 | 143076589 |



|            |                |   |           |           |
|------------|----------------|---|-----------|-----------|
| Sma-1-7598 | NW_003038005.1 | + | 301413    | 301462    |
| Sma-1-7599 | NS_000200.1    | + | 224707367 | 224707416 |
| Sma-1-7600 | NW_003021096.1 | - | 159       | 110       |
| Sma-1-7601 | NW_003021302.1 | - | 1636      | 1587      |
| Sma-1-7602 | NW_003025204.1 | - | 1486      | 1437      |
| Sma-1-7603 | NW_003026502.1 | - | 5640      | 5591      |
| Sma-1-7604 | NW_003026628.1 | - | 4987      | 4938      |
| Sma-1-7605 | NW_003029722.1 | - | 935       | 886       |
| Sma-1-7606 | NW_003029802.1 | - | 1470      | 1421      |
| Sma-1-7607 | NW_003029993.1 | - | 1859      | 1810      |
| Sma-1-7608 | NW_003034555.1 | + | 8655      | 8704      |
| Sma-1-7609 | NW_003034571.1 | - | 1504      | 1455      |
| Sma-1-7610 | NW_003035663.1 | - | 5889      | 5840      |
| Sma-1-7611 | NW_003035928.1 | + | 1213      | 1262      |
| Sma-1-7612 | NW_003036308.1 | + | 1143      | 1192      |
| Sma-1-7613 | NW_003037874.1 | + | 172368    | 172417    |
| Sma-1-7614 | NW_003037876.1 | + | 389895    | 389944    |
| Sma-1-7615 | NW_003035880.1 | + | 165905    | 165954    |
| Sma-1-7616 | NW_003037670.1 | + | 1692      | 1741      |
| Sma-1-7617 | NW_003037293.1 | + | 1688      | 1737      |
| Sma-1-7618 | NW_003026611.1 | + | 256077    | 256126    |
| Sma-1-7619 | NW_003038002.1 | - | 23785     | 23736     |
| Sma-1-7620 | NW_003038381.1 | - | 7001      | 6952      |
| Sma-1-7621 | NW_003026618.1 | - | 219334    | 219285    |
| Sma-1-7622 | NW_003035576.1 | + | 12102     | 12151     |
| Sma-1-7623 | NW_003026460.1 | + | 157696    | 157745    |
| Sma-1-7624 | NW_003037790.1 | + | 233114    | 233163    |
| Sma-1-7625 | NW_003037790.1 | - | 241545    | 241496    |
| Sma-1-7626 | NW_003038258.1 | + | 120840    | 120889    |
| Sma-1-7627 | NW_003037929.1 | + | 12688     | 12737     |
| Sma-1-7628 | NW_003037937.1 | + | 582051    | 582100    |
| Sma-1-7629 | NW_003039005.1 | - | 49962     | 49913     |
| Sma-1-7630 | NW_003038250.1 | + | 39267     | 39316     |
| Sma-1-7631 | NW_003026456.1 | + | 422105    | 422154    |
| Sma-1-7632 | NW_003035881.1 | + | 451225    | 451274    |
| Sma-1-7633 | NW_003037791.1 | + | 496605    | 496654    |
| Sma-1-7634 | NW_003037793.1 | + | 1313949   | 1313998   |
| Sma-1-7635 | NW_003037793.1 | + | 3002683   | 3002732   |
| Sma-1-7636 | NW_003037793.1 | - | 4122349   | 4122300   |
| Sma-1-7637 | NW_003037793.1 | - | 2894335   | 2894286   |
| Sma-1-7638 | NW_003037793.1 | - | 2841680   | 2841631   |
| Sma-1-7639 | NW_003037793.1 | - | 312734    | 312685    |
| Sma-1-7640 | NW_003037795.1 | + | 1297757   | 1297806   |
| Sma-1-7641 | NW_003037795.1 | - | 603419    | 603370    |
| Sma-1-7642 | NW_003037796.1 | + | 1683974   | 1684023   |
| Sma-1-7643 | NW_003037797.1 | + | 1241621   | 1241670   |
| Sma-1-7644 | NW_003037797.1 | + | 1803982   | 1804031   |
| Sma-1-7645 | NW_003037798.1 | + | 487793    | 487842    |
| Sma-1-7646 | NW_003037798.1 | + | 2567621   | 2567670   |
| Sma-1-7647 | NW_003037801.1 | + | 616747    | 616796    |
| Sma-1-7648 | NW_003037802.1 | - | 1029474   | 1029425   |
| Sma-1-7649 | NW_003037803.1 | + | 346967    | 347016    |

|            |                |   |         |         |
|------------|----------------|---|---------|---------|
| Sma-1-7650 | NW_003037803.1 | - | 1000845 | 1000796 |
| Sma-1-7651 | NW_003037804.1 | - | 228896  | 228847  |
| Sma-1-7652 | NW_003037805.1 | - | 1040248 | 1040199 |
| Sma-1-7653 | NW_003037806.1 | + | 693027  | 693076  |
| Sma-1-7654 | NW_003037806.1 | - | 72624   | 72575   |
| Sma-1-7655 | NW_003037807.1 | + | 798192  | 798241  |
| Sma-1-7656 | NW_003037807.1 | + | 835262  | 835311  |
| Sma-1-7657 | NW_003037807.1 | + | 853056  | 853105  |
| Sma-1-7658 | NW_003037807.1 | + | 1031197 | 1031246 |
| Sma-1-7659 | NW_003037807.1 | - | 857880  | 857831  |
| Sma-1-7660 | NW_003037809.1 | + | 694328  | 694377  |
| Sma-1-7661 | NW_003037809.1 | + | 2634283 | 2634332 |
| Sma-1-7662 | NW_003037809.1 | + | 2736626 | 2736675 |
| Sma-1-7663 | NW_003037809.1 | - | 1971050 | 1971001 |
| Sma-1-7664 | NW_003037810.1 | - | 1034340 | 1034291 |
| Sma-1-7665 | NW_003037811.1 | + | 734335  | 734384  |
| Sma-1-7666 | NW_003037811.1 | - | 332010  | 331961  |
| Sma-1-7667 | NW_003037813.1 | + | 711545  | 711594  |
| Sma-1-7668 | NW_003037814.1 | - | 1592234 | 1592185 |
| Sma-1-7669 | NW_003037816.1 | + | 73111   | 73160   |
| Sma-1-7670 | NW_003037819.1 | + | 493486  | 493535  |
| Sma-1-7671 | NW_003037823.1 | - | 782605  | 782556  |
| Sma-1-7672 | NW_003037823.1 | - | 277544  | 277495  |
| Sma-1-7673 | NW_003037825.1 | - | 480780  | 480731  |
| Sma-1-7674 | NW_003037827.1 | + | 94832   | 94881   |
| Sma-1-7675 | NW_003037830.1 | - | 1534344 | 1534295 |
| Sma-1-7676 | NW_003037831.1 | - | 897534  | 897485  |
| Sma-1-7677 | NW_003037833.1 | + | 284344  | 284393  |
| Sma-1-7678 | NW_003037833.1 | - | 950938  | 950889  |
| Sma-1-7679 | NW_003037834.1 | + | 727663  | 727712  |
| Sma-1-7680 | NW_003037838.1 | + | 905576  | 905625  |
| Sma-1-7681 | NW_003037838.1 | - | 85166   | 85117   |
| Sma-1-7682 | NW_003037839.1 | - | 936377  | 936328  |
| Sma-1-7683 | NW_003037848.1 | - | 1193149 | 1193100 |
| Sma-1-7684 | NW_003037849.1 | + | 242462  | 242511  |
| Sma-1-7685 | NW_003037850.1 | + | 1362961 | 1363010 |
| Sma-1-7686 | NW_003037850.1 | - | 342251  | 342202  |
| Sma-1-7687 | NW_003037854.1 | + | 1001623 | 1001672 |
| Sma-1-7688 | NW_003037859.1 | + | 661671  | 661720  |
| Sma-1-7689 | NW_003037863.1 | + | 275997  | 276046  |
| Sma-1-7690 | NW_003037863.1 | + | 391559  | 391608  |
| Sma-1-7691 | NW_003037863.1 | + | 665951  | 666000  |
| Sma-1-7692 | NW_003037863.1 | + | 668613  | 668662  |
| Sma-1-7693 | NW_003037863.1 | - | 1509211 | 1509162 |
| Sma-1-7694 | NW_003037864.1 | - | 643513  | 643464  |
| Sma-1-7695 | NW_003037865.1 | + | 545810  | 545859  |
| Sma-1-7696 | NW_003037870.1 | - | 442237  | 442188  |
| Sma-1-7697 | NW_003037871.1 | + | 342452  | 342501  |
| Sma-1-7698 | NW_003037884.1 | - | 443192  | 443143  |
| Sma-1-7699 | NW_003037887.1 | + | 175510  | 175559  |
| Sma-1-7700 | NW_003037888.1 | + | 990603  | 990652  |
| Sma-1-7701 | NW_003037890.1 | + | 1555381 | 1555430 |

|            |                |   |         |         |
|------------|----------------|---|---------|---------|
| Sma-1-7702 | NW_003037890.1 | - | 2125184 | 2125135 |
| Sma-1-7703 | NW_003037899.1 | - | 429968  | 429919  |
| Sma-1-7704 | NW_003037901.1 | - | 863274  | 863225  |
| Sma-1-7705 | NW_003037901.1 | - | 853714  | 853665  |
| Sma-1-7706 | NW_003037902.1 | - | 195046  | 194997  |
| Sma-1-7707 | NW_003037904.1 | - | 436288  | 436239  |
| Sma-1-7708 | NW_003037906.1 | - | 36458   | 36409   |
| Sma-1-7709 | NW_003037907.1 | + | 83409   | 83458   |
| Sma-1-7710 | NW_003037911.1 | + | 675597  | 675646  |
| Sma-1-7711 | NW_003037912.1 | - | 1337254 | 1337205 |
| Sma-1-7712 | NW_003037912.1 | - | 57990   | 57941   |
| Sma-1-7713 | NW_003037914.1 | + | 288592  | 288641  |
| Sma-1-7714 | NW_003037914.1 | - | 434570  | 434521  |
| Sma-1-7715 | NW_003037916.1 | + | 1573574 | 1573623 |
| Sma-1-7716 | NW_003037924.1 | - | 365564  | 365515  |
| Sma-1-7717 | NW_003037926.1 | + | 232010  | 232059  |
| Sma-1-7718 | NW_003037930.1 | + | 923622  | 923671  |
| Sma-1-7719 | NW_003037930.1 | - | 925174  | 925125  |
| Sma-1-7720 | NW_003037932.1 | - | 517165  | 517116  |
| Sma-1-7721 | NW_003037938.1 | + | 522035  | 522084  |
| Sma-1-7722 | NW_003037939.1 | - | 578449  | 578400  |
| Sma-1-7723 | NW_003037942.1 | - | 427683  | 427634  |
| Sma-1-7724 | NW_003037943.1 | + | 403911  | 403960  |
| Sma-1-7725 | NW_003037944.1 | + | 611525  | 611574  |
| Sma-1-7726 | NW_003037944.1 | - | 858804  | 858755  |
| Sma-1-7727 | NW_003037945.1 | + | 1083554 | 1083603 |
| Sma-1-7728 | NW_003037968.1 | + | 199018  | 199067  |
| Sma-1-7729 | NW_003037972.1 | + | 591419  | 591468  |
| Sma-1-7730 | NW_003037975.1 | + | 703256  | 703305  |
| Sma-1-7731 | NW_003037978.1 | - | 122730  | 122681  |
| Sma-1-7732 | NW_003037980.1 | + | 377621  | 377670  |
| Sma-1-7733 | NW_003037980.1 | - | 377427  | 377378  |
| Sma-1-7734 | NW_003037982.1 | - | 234293  | 234244  |
| Sma-1-7735 | NW_003037994.1 | + | 299923  | 299972  |
| Sma-1-7736 | NW_003038010.1 | - | 466160  | 466111  |
| Sma-1-7737 | NW_003038014.1 | - | 416404  | 416355  |
| Sma-1-7738 | NW_003038018.1 | - | 523563  | 523514  |
| Sma-1-7739 | NW_003038020.1 | - | 57952   | 57903   |
| Sma-1-7740 | NW_003038021.1 | - | 481161  | 481112  |
| Sma-1-7741 | NW_003038025.1 | + | 131147  | 131196  |
| Sma-1-7742 | NW_003038026.1 | - | 761111  | 761062  |
| Sma-1-7743 | NW_003038028.1 | + | 672149  | 672198  |
| Sma-1-7744 | NW_003038029.1 | - | 676791  | 676742  |
| Sma-1-7745 | NW_003038031.1 | + | 440581  | 440630  |
| Sma-1-7746 | NW_003038033.1 | + | 119718  | 119767  |
| Sma-1-7747 | NW_003038034.1 | + | 566227  | 566276  |
| Sma-1-7748 | NW_003038034.1 | - | 564879  | 564830  |
| Sma-1-7749 | NW_003038038.1 | - | 926154  | 926105  |
| Sma-1-7750 | NW_003038230.1 | + | 205027  | 205076  |
| Sma-1-7751 | NW_003038248.1 | + | 71923   | 71972   |
| Sma-1-7752 | NW_003038251.1 | + | 221543  | 221592  |
| Sma-1-7753 | NW_003038261.1 | - | 744200  | 744151  |

|            |                |   |           |           |
|------------|----------------|---|-----------|-----------|
| Sma-1-7754 | NW_003038505.1 | + | 147126    | 147175    |
| Sma-1-7755 | NW_003038517.1 | + | 116311    | 116360    |
| Sma-1-7756 | NW_003039127.1 | + | 1252019   | 1252068   |
| Sma-1-7757 | NW_003026511.1 | - | 350253    | 350204    |
| Sma-1-7758 | NW_003038044.1 | - | 85921     | 85872     |
| Sma-1-7759 | NW_003038053.1 | + | 289066    | 289115    |
| Sma-1-7760 | NW_003038058.1 | + | 387942    | 387991    |
| Sma-1-7761 | NW_003038064.1 | + | 123752    | 123801    |
| Sma-1-7762 | NW_003038064.1 | - | 60101     | 60052     |
| Sma-1-7763 | NW_003038067.1 | - | 93491     | 93442     |
| Sma-1-7764 | NW_003038083.1 | - | 478939    | 478890    |
| Sma-1-7765 | NW_003038114.1 | - | 175976    | 175927    |
| Sma-1-7766 | NW_003038128.1 | - | 32107     | 32058     |
| Sma-1-7767 | NW_003038133.1 | + | 177867    | 177916    |
| Sma-1-7768 | NW_003038138.1 | - | 173350    | 173301    |
| Sma-1-7769 | NW_003038148.1 | - | 115662    | 115613    |
| Sma-1-7770 | NW_003038151.1 | + | 161685    | 161734    |
| Sma-1-7771 | NW_003038161.1 | - | 196478    | 196429    |
| Sma-1-7772 | NW_003038163.1 | + | 39763     | 39812     |
| Sma-1-7773 | NW_003038163.1 | - | 510702    | 510653    |
| Sma-1-7774 | NW_003038191.1 | + | 66079     | 66128     |
| Sma-1-7775 | NS_000200.1    | + | 1313949   | 1313998   |
| Sma-1-7776 | NS_000200.1    | + | 3002683   | 3002732   |
| Sma-1-7777 | NS_000200.1    | + | 7688640   | 7688689   |
| Sma-1-7778 | NS_000200.1    | + | 9893618   | 9893667   |
| Sma-1-7779 | NS_000200.1    | + | 11669481  | 11669530  |
| Sma-1-7780 | NS_000200.1    | + | 12231842  | 12231891  |
| Sma-1-7781 | NS_000200.1    | + | 14746951  | 14747000  |
| Sma-1-7782 | NS_000200.1    | + | 16826779  | 16826828  |
| Sma-1-7783 | NS_000200.1    | + | 21706227  | 21706276  |
| Sma-1-7784 | NS_000200.1    | + | 23847504  | 23847553  |
| Sma-1-7785 | NS_000200.1    | + | 28888241  | 28888290  |
| Sma-1-7786 | NS_000200.1    | + | 31059708  | 31059757  |
| Sma-1-7787 | NS_000200.1    | + | 31096778  | 31096827  |
| Sma-1-7788 | NS_000200.1    | + | 31114572  | 31114621  |
| Sma-1-7789 | NS_000200.1    | + | 31292713  | 31292762  |
| Sma-1-7790 | NS_000200.1    | + | 34358792  | 34358841  |
| Sma-1-7791 | NS_000200.1    | + | 36298747  | 36298796  |
| Sma-1-7792 | NS_000200.1    | + | 36401090  | 36401139  |
| Sma-1-7793 | NS_000200.1    | + | 38904577  | 38904626  |
| Sma-1-7794 | NS_000200.1    | + | 41698408  | 41698457  |
| Sma-1-7795 | NS_000200.1    | + | 46281983  | 46282032  |
| Sma-1-7796 | NS_000200.1    | + | 51581751  | 51581800  |
| Sma-1-7797 | NS_000200.1    | + | 58345241  | 58345290  |
| Sma-1-7798 | NS_000200.1    | + | 62716973  | 62717022  |
| Sma-1-7799 | NS_000200.1    | + | 72475440  | 72475489  |
| Sma-1-7800 | NS_000200.1    | + | 73888149  | 73888198  |
| Sma-1-7801 | NS_000200.1    | + | 78904139  | 78904188  |
| Sma-1-7802 | NS_000200.1    | + | 91218735  | 91218784  |
| Sma-1-7803 | NS_000200.1    | + | 93348991  | 93349040  |
| Sma-1-7804 | NS_000200.1    | + | 97906044  | 97906093  |
| Sma-1-7805 | NS_000200.1    | + | 103340512 | 103340561 |

|            |             |   |           |           |
|------------|-------------|---|-----------|-----------|
| Sma-1-7806 | NS_000200.1 | + | 107034364 | 107034413 |
| Sma-1-7807 | NS_000200.1 | + | 107149926 | 107149975 |
| Sma-1-7808 | NS_000200.1 | + | 107424318 | 107424367 |
| Sma-1-7809 | NS_000200.1 | + | 107426980 | 107427029 |
| Sma-1-7810 | NS_000200.1 | + | 110967729 | 110967778 |
| Sma-1-7811 | NS_000200.1 | + | 114329518 | 114329567 |
| Sma-1-7812 | NS_000200.1 | + | 117790190 | 117790239 |
| Sma-1-7813 | NS_000200.1 | + | 119597318 | 119597367 |
| Sma-1-7814 | NS_000200.1 | + | 120935531 | 120935580 |
| Sma-1-7815 | NS_000200.1 | + | 130639488 | 130639537 |
| Sma-1-7816 | NS_000200.1 | + | 133199095 | 133199144 |
| Sma-1-7817 | NS_000200.1 | + | 137238742 | 137238791 |
| Sma-1-7818 | NS_000200.1 | + | 151487898 | 151487947 |
| Sma-1-7819 | NS_000200.1 | + | 156462950 | 156462999 |
| Sma-1-7820 | NS_000200.1 | + | 160432842 | 160432891 |
| Sma-1-7821 | NS_000200.1 | + | 164766985 | 164767034 |
| Sma-1-7822 | NS_000200.1 | + | 170679902 | 170679951 |
| Sma-1-7823 | NS_000200.1 | + | 173400280 | 173400329 |
| Sma-1-7824 | NS_000200.1 | + | 175253466 | 175253515 |
| Sma-1-7825 | NS_000200.1 | + | 176781586 | 176781635 |
| Sma-1-7826 | NS_000200.1 | + | 181781960 | 181782009 |
| Sma-1-7827 | NS_000200.1 | + | 182559148 | 182559197 |
| Sma-1-7828 | NS_000200.1 | + | 187425444 | 187425493 |
| Sma-1-7829 | NS_000200.1 | + | 188832878 | 188832927 |
| Sma-1-7830 | NS_000200.1 | + | 190185518 | 190185567 |
| Sma-1-7831 | NS_000200.1 | + | 200116188 | 200116237 |
| Sma-1-7832 | NS_000200.1 | + | 203067123 | 203067172 |
| Sma-1-7833 | NS_000200.1 | + | 206285480 | 206285529 |
| Sma-1-7834 | NS_000200.1 | + | 211338483 | 211338532 |
| Sma-1-7835 | NS_000200.1 | + | 218831737 | 218831786 |
| Sma-1-7836 | NS_000200.1 | + | 238989392 | 238989441 |
| Sma-1-7837 | NS_000200.1 | + | 241979723 | 241979772 |
| Sma-1-7838 | NS_000200.1 | + | 244718339 | 244718388 |
| Sma-1-7839 | NS_000200.1 | + | 246099720 | 246099769 |
| Sma-1-7840 | NS_000200.1 | + | 247507983 | 247508032 |
| Sma-1-7841 | NS_000200.1 | + | 257649161 | 257649210 |
| Sma-1-7842 | NS_000200.1 | + | 260219142 | 260219191 |
| Sma-1-7843 | NS_000200.1 | + | 261960329 | 261960378 |
| Sma-1-7844 | NS_000200.1 | + | 283050049 | 283050098 |
| Sma-1-7845 | NS_000200.1 | + | 292068928 | 292068977 |
| Sma-1-7846 | NS_000200.1 | + | 298440043 | 298440092 |
| Sma-1-7847 | NS_000200.1 | + | 302553264 | 302553313 |
| Sma-1-7848 | NS_000200.1 | + | 310825861 | 310825910 |
| Sma-1-7849 | NS_000200.1 | + | 311490598 | 311490647 |
| Sma-1-7850 | NS_000200.1 | + | 316383190 | 316383239 |
| Sma-1-7851 | NS_000200.1 | + | 318091944 | 318091993 |
| Sma-1-7852 | NS_000200.1 | + | 318553315 | 318553364 |
| Sma-1-7853 | NS_000200.1 | + | 322659350 | 322659399 |
| Sma-1-7854 | NS_000200.1 | + | 327350861 | 327350910 |
| Sma-1-7855 | NS_000200.1 | + | 329002473 | 329002522 |
| Sma-1-7856 | NS_000200.1 | + | 336226463 | 336226512 |
| Sma-1-7857 | NS_000200.1 | + | 339406969 | 339407018 |

|            |             |   |           |           |
|------------|-------------|---|-----------|-----------|
| Sma-1-7858 | NS_000200.1 | + | 340880799 | 340880848 |
| Sma-1-7859 | NS_000200.1 | + | 341515430 | 341515479 |
| Sma-1-7860 | NS_000200.1 | + | 343049026 | 343049075 |
| Sma-1-7861 | NS_000200.1 | + | 359604278 | 359604327 |
| Sma-1-7862 | NS_000200.1 | + | 365411291 | 365411340 |
| Sma-1-7863 | NS_000200.1 | + | 374840302 | 374840351 |
| Sma-1-7864 | NS_000200.1 | + | 381577286 | 381577335 |
| Sma-1-7865 | NS_000200.1 | + | 382202033 | 382202082 |
| Sma-1-7866 | NS_000200.1 | - | 381585717 | 381585668 |
| Sma-1-7867 | NS_000200.1 | - | 375807994 | 375807945 |
| Sma-1-7868 | NS_000200.1 | - | 371821499 | 371821450 |
| Sma-1-7869 | NS_000200.1 | - | 367926913 | 367926864 |
| Sma-1-7870 | NS_000200.1 | - | 366484324 | 366484275 |
| Sma-1-7871 | NS_000200.1 | - | 361392565 | 361392516 |
| Sma-1-7872 | NS_000200.1 | - | 358076903 | 358076854 |
| Sma-1-7873 | NS_000200.1 | - | 357394776 | 357394727 |
| Sma-1-7874 | NS_000200.1 | - | 331272654 | 331272605 |
| Sma-1-7875 | NS_000200.1 | - | 327675636 | 327675587 |
| Sma-1-7876 | NS_000200.1 | - | 327588990 | 327588941 |
| Sma-1-7877 | NS_000200.1 | - | 324974552 | 324974503 |
| Sma-1-7878 | NS_000200.1 | - | 324357851 | 324357802 |
| Sma-1-7879 | NS_000200.1 | - | 321974336 | 321974287 |
| Sma-1-7880 | NS_000200.1 | - | 298910982 | 298910933 |
| Sma-1-7881 | NS_000200.1 | - | 297566329 | 297566280 |
| Sma-1-7882 | NS_000200.1 | - | 290189646 | 290189597 |
| Sma-1-7883 | NS_000200.1 | - | 285728665 | 285728616 |
| Sma-1-7884 | NS_000200.1 | - | 284733305 | 284733256 |
| Sma-1-7885 | NS_000200.1 | - | 280750395 | 280750346 |
| Sma-1-7886 | NS_000200.1 | - | 276901881 | 276901832 |
| Sma-1-7887 | NS_000200.1 | - | 276042076 | 276042027 |
| Sma-1-7888 | NS_000200.1 | - | 270722276 | 270722227 |
| Sma-1-7889 | NS_000200.1 | - | 262947544 | 262947495 |
| Sma-1-7890 | NS_000200.1 | - | 261896678 | 261896629 |
| Sma-1-7891 | NS_000200.1 | - | 254710703 | 254710654 |
| Sma-1-7892 | NS_000200.1 | - | 252829547 | 252829498 |
| Sma-1-7893 | NS_000200.1 | - | 247506635 | 247506586 |
| Sma-1-7894 | NS_000200.1 | - | 242877692 | 242877643 |
| Sma-1-7895 | NS_000200.1 | - | 240268872 | 240268823 |
| Sma-1-7896 | NS_000200.1 | - | 235309736 | 235309687 |
| Sma-1-7897 | NS_000200.1 | - | 234025296 | 234025247 |
| Sma-1-7898 | NS_000200.1 | - | 232924413 | 232924364 |
| Sma-1-7899 | NS_000200.1 | - | 230157093 | 230157044 |
| Sma-1-7900 | NS_000200.1 | - | 227284383 | 227284334 |
| Sma-1-7901 | NS_000200.1 | - | 223143994 | 223143945 |
| Sma-1-7902 | NS_000200.1 | - | 213893488 | 213893439 |
| Sma-1-7903 | NS_000200.1 | - | 211338289 | 211338240 |
| Sma-1-7904 | NS_000200.1 | - | 209390740 | 209390691 |
| Sma-1-7905 | NS_000200.1 | - | 189080157 | 189080108 |
| Sma-1-7906 | NS_000200.1 | - | 186187591 | 186187542 |
| Sma-1-7907 | NS_000200.1 | - | 183448203 | 183448154 |
| Sma-1-7908 | NS_000200.1 | - | 178050361 | 178050312 |
| Sma-1-7909 | NS_000200.1 | - | 176783138 | 176783089 |

|            |                         |   |           |           |
|------------|-------------------------|---|-----------|-----------|
| Sma-1-7910 | NS_000200.1             | - | 172072522 | 172072473 |
| Sma-1-7911 | NS_000200.1             | - | 160578820 | 160578771 |
| Sma-1-7912 | NS_000200.1             | - | 158148829 | 158148780 |
| Sma-1-7913 | NS_000200.1             | - | 156869565 | 156869516 |
| Sma-1-7914 | NS_000200.1             | - | 150344237 | 150344188 |
| Sma-1-7915 | NS_000200.1             | - | 149150787 | 149150738 |
| Sma-1-7916 | NS_000200.1             | - | 146950280 | 146950231 |
| Sma-1-7917 | NS_000200.1             | - | 146711735 | 146711686 |
| Sma-1-7918 | NS_000200.1             | - | 146702175 | 146702126 |
| Sma-1-7919 | NS_000200.1             | - | 144949079 | 144949030 |
| Sma-1-7920 | NS_000200.1             | - | 137808545 | 137808496 |
| Sma-1-7921 | NS_000200.1             | - | 127222857 | 127222808 |
| Sma-1-7922 | NS_000200.1             | - | 117315902 | 117315853 |
| Sma-1-7923 | NS_000200.1             | - | 109136087 | 109136038 |
| Sma-1-7924 | NS_000200.1             | - | 108267578 | 108267529 |
| Sma-1-7925 | NS_000200.1             | - | 92328281  | 92328232  |
| Sma-1-7926 | NS_000200.1             | - | 90886220  | 90886171  |
| Sma-1-7927 | NS_000200.1             | - | 79894527  | 79894478  |
| Sma-1-7928 | NS_000200.1             | - | 78083729  | 78083680  |
| Sma-1-7929 | NS_000200.1             | - | 73142034  | 73141985  |
| Sma-1-7930 | NS_000200.1             | - | 70346836  | 70346787  |
| Sma-1-7931 | NS_000200.1             | - | 69424715  | 69424666  |
| Sma-1-7932 | NS_000200.1             | - | 59610562  | 59610513  |
| Sma-1-7933 | NS_000200.1             | - | 56699224  | 56699175  |
| Sma-1-7934 | NS_000200.1             | - | 56194163  | 56194114  |
| Sma-1-7935 | NS_000200.1             | - | 44576094  | 44576045  |
| Sma-1-7936 | NS_000200.1             | - | 38502252  | 38502203  |
| Sma-1-7937 | NS_000200.1             | - | 37638862  | 37638813  |
| Sma-1-7938 | NS_000200.1             | - | 35635514  | 35635465  |
| Sma-1-7939 | NS_000200.1             | - | 31119396  | 31119347  |
| Sma-1-7940 | NS_000200.1             | - | 28267838  | 28267789  |
| Sma-1-7941 | NS_000200.1             | - | 27598092  | 27598043  |
| Sma-1-7942 | NS_000200.1             | - | 25368916  | 25368867  |
| Sma-1-7943 | NS_000200.1             | - | 24501382  | 24501333  |
| Sma-1-7944 | NS_000200.1             | - | 23032268  | 23032219  |
| Sma-1-7945 | NS_000200.1             | - | 6994302   | 6994253   |
| Sma-1-7946 | NS_000200.1             | - | 4122349   | 4122300   |
| Sma-1-7947 | NS_000200.1             | - | 2894335   | 2894286   |
| Sma-1-7948 | NS_000200.1             | - | 2841680   | 2841631   |
| Sma-1-7949 | NS_000200.1             | - | 312734    | 312685    |
| env-85     | JCVL_SCAF_1096628084112 | + | 139       | 188       |
| Sma-1-7950 | NW_003038006.1          | - | 71278     | 71228     |
| Sma-1-7951 | NS_000200.1             | - | 224955762 | 224955712 |
| Sma-1-7952 | NW_003038009.1          | + | 238586    | 238635    |
| Sma-1-7953 | NS_000200.1             | + | 226612649 | 226612698 |
| Sma-1-7954 | NW_003038011.1          | + | 425468    | 425517    |
| Sma-1-7955 | NW_003038011.1          | - | 424753    | 424704    |
| Sma-1-7956 | NS_000200.1             | + | 227953118 | 227953167 |
| Sma-1-7957 | NS_000200.1             | - | 227952403 | 227952354 |
| Sma-1-7958 | NW_003038020.1          | - | 106616    | 106567    |
| Sma-1-7959 | NS_000200.1             | - | 234073960 | 234073911 |
| Sma-1-7960 | NW_003037800.1          | - | 1570095   | 1570046   |

|            |                |   |           |           |
|------------|----------------|---|-----------|-----------|
| Sma-1-7961 | NS_000200.1    | - | 20199455  | 20199406  |
| Sma-1-7962 | NW_003038241.1 | - | 79473     | 79424     |
| Sma-1-7963 | NS_000200.1    | - | 314542178 | 314542129 |
| Sma-1-7964 | NW_003029512.1 | - | 324       | 275       |
| Sma-1-7965 | NW_003038198.1 | + | 7519      | 7568      |
| Sma-1-7966 | NW_003037817.1 | - | 988965    | 988916    |
| Sma-1-7967 | NS_000200.1    | + | 303438479 | 303438528 |
| Sma-1-7968 | NS_000200.1    | - | 362191529 | 362191480 |
| Sma-1-7969 | NS_000200.1    | - | 48371317  | 48371268  |
| Sma-1-7970 | NW_003038161.1 | + | 244927    | 244976    |
| Sma-1-7971 | NS_000200.1    | + | 297614778 | 297614827 |
| Sma-1-7972 | NW_003020651.1 | - | 643       | 594       |
| Sma-1-7973 | NW_003035436.1 | - | 1512      | 1463      |
| Sma-1-7974 | NW_003038420.1 | - | 16157     | 16108     |
| Sma-1-7975 | NW_003038256.1 | + | 225215    | 225264    |
| Sma-1-7976 | NW_003038070.1 | + | 171503    | 171552    |
| Sma-1-7977 | NW_003037797.1 | - | 1638676   | 1638627   |
| Sma-1-7978 | NW_003037799.1 | - | 742839    | 742790    |
| Sma-1-7979 | NW_003037805.1 | - | 1763      | 1714      |
| Sma-1-7980 | NW_003037809.1 | - | 688083    | 688034    |
| Sma-1-7981 | NW_003037814.1 | - | 2120766   | 2120717   |
| Sma-1-7982 | NW_003037814.1 | - | 807048    | 806999    |
| Sma-1-7983 | NW_003037838.1 | + | 350920    | 350969    |
| Sma-1-7984 | NW_003037841.1 | - | 932757    | 932708    |
| Sma-1-7985 | NW_003037847.1 | + | 354174    | 354223    |
| Sma-1-7986 | NW_003037866.1 | + | 1106772   | 1106821   |
| Sma-1-7987 | NW_003037887.1 | - | 1192361   | 1192312   |
| Sma-1-7988 | NW_003037888.1 | - | 1384196   | 1384147   |
| Sma-1-7989 | NW_003037924.1 | - | 313576    | 313527    |
| Sma-1-7990 | NW_003037928.1 | - | 907829    | 907780    |
| Sma-1-7991 | NW_003037978.1 | - | 69612     | 69563     |
| Sma-1-7992 | NW_003037980.1 | + | 1274182   | 1274231   |
| Sma-1-7993 | NW_003037982.1 | - | 473311    | 473262    |
| Sma-1-7994 | NW_003038239.1 | - | 7134      | 7085      |
| Sma-1-7995 | NW_003038518.1 | + | 906157    | 906206    |
| Sma-1-7996 | NS_000200.1    | + | 78349483  | 78349532  |
| Sma-1-7997 | NS_000200.1    | + | 89005904  | 89005953  |
| Sma-1-7998 | NS_000200.1    | + | 112594571 | 112594620 |
| Sma-1-7999 | NS_000200.1    | + | 212235044 | 212235093 |
| Sma-1-8000 | NS_000200.1    | + | 264508744 | 264508793 |
| Sma-1-8001 | NS_000200.1    | + | 320959041 | 320959090 |
| Sma-1-8002 | NS_000200.1    | + | 342542990 | 342543039 |
| Sma-1-8003 | NS_000200.1    | - | 367464174 | 367464125 |
| Sma-1-8004 | NS_000200.1    | - | 360555039 | 360554990 |
| Sma-1-8005 | NS_000200.1    | - | 328938188 | 328938139 |
| Sma-1-8006 | NS_000200.1    | - | 313847916 | 313847867 |
| Sma-1-8007 | NS_000200.1    | - | 214132506 | 214132457 |
| Sma-1-8008 | NS_000200.1    | - | 209337622 | 209337573 |
| Sma-1-8009 | NS_000200.1    | - | 175231782 | 175231733 |
| Sma-1-8010 | NS_000200.1    | - | 172020534 | 172020485 |
| Sma-1-8011 | NS_000200.1    | - | 133592688 | 133592639 |
| Sma-1-8012 | NS_000200.1    | - | 131656339 | 131656290 |



|            |                |   |           |           |
|------------|----------------|---|-----------|-----------|
| Sma-1-8013 | NS_000200.1    | - | 83543938  | 83543889  |
| Sma-1-8014 | NS_000200.1    | - | 45104626  | 45104577  |
| Sma-1-8015 | NS_000200.1    | - | 43790908  | 43790859  |
| Sma-1-8016 | NS_000200.1    | - | 34352547  | 34352498  |
| Sma-1-8017 | NS_000200.1    | - | 26559607  | 26559558  |
| Sma-1-8018 | NS_000200.1    | - | 17733193  | 17733144  |
| Sma-1-8019 | NS_000200.1    | - | 12066536  | 12066487  |
| Sma-1-8020 | NW_003031824.1 | + | 1129      | 1178      |
| Sma-1-8021 | NS_000200.1    | + | 367101584 | 367101633 |
| Sma-1-8022 | NW_003037833.1 | + | 902344    | 902393    |
| Sma-1-8023 | NS_000200.1    | + | 73093440  | 73093489  |
| Sma-1-8024 | NW_003037827.1 | - | 537437    | 537388    |
| Sma-1-8025 | NS_000200.1    | - | 63159578  | 63159529  |
| Sma-1-8026 | NW_003037827.1 | + | 367264    | 367313    |
| Sma-1-8027 | NS_000200.1    | + | 62989405  | 62989454  |
| Sma-1-8028 | NW_003037917.1 | + | 726027    | 726076    |
| Sma-1-8029 | NS_000200.1    | + | 165762831 | 165762880 |
| Sma-1-8030 | NW_003037822.1 | - | 1447190   | 1447141   |
| Sma-1-8031 | NS_000200.1    | - | 55755196  | 55755147  |
| Sma-1-8032 | NW_003037809.1 | - | 725364    | 725315    |
| Sma-1-8033 | NW_003037815.1 | + | 445526    | 445575    |
| Sma-1-8034 | NS_000200.1    | + | 45708517  | 45708566  |
| Sma-1-8035 | NS_000200.1    | - | 34389828  | 34389779  |
| Sma-1-8036 | NW_003026581.1 | + | 25889     | 25938     |
| Sma-1-8037 | NS_000200.1    | + | 302855877 | 302855926 |
| Sma-1-8038 | NW_003026515.1 | + | 269482    | 269531    |
| Sma-1-8039 | NS_000200.1    | + | 290913893 | 290913942 |
| Sma-1-8040 | NW_003026464.1 | + | 125437    | 125486    |
| Sma-1-8041 | NS_000200.1    | + | 203425746 | 203425795 |
| Sma-1-8042 | NW_003026594.1 | - | 18593     | 18544     |
| Sma-1-8043 | NS_000200.1    | - | 304962963 | 304962914 |
| Sma-1-8044 | NW_003023534.1 | - | 4182      | 4133      |
| Sma-1-8045 | NS_000200.1    | - | 373586856 | 373586807 |
| Sma-1-8046 | NW_003038005.1 | + | 454534    | 454583    |
| Sma-1-8047 | NS_000200.1    | + | 224860488 | 224860537 |
| Sma-1-8048 | NW_003038240.1 | + | 296867    | 296916    |
| Sma-1-8049 | NS_000200.1    | + | 314435798 | 314435847 |
| Sma-1-8050 | NW_003038268.1 | + | 11603     | 11652     |
| Sma-1-8051 | NS_000200.1    | + | 324908914 | 324908963 |
| Sma-1-8052 | NW_003036361.1 | + | 482       | 531       |
| Sma-1-8053 | NW_003037902.1 | + | 246752    | 246801    |
| Sma-1-8054 | NW_003038155.1 | + | 501308    | 501357    |
| Sma-1-8055 | NS_000200.1    | + | 147001986 | 147002035 |
| Sma-1-8056 | NS_000200.1    | + | 294624426 | 294624475 |
| Sma-1-8057 | NS_000200.1    | + | 359705286 | 359705335 |
| Sma-1-8058 | NW_003023365.1 | + | 349       | 398       |
| Sma-1-8059 | NW_003038256.1 | - | 269719    | 269670    |
| Sma-1-8060 | NW_003037937.1 | - | 201148    | 201099    |
| Sma-1-8061 | NW_003037894.1 | - | 171233    | 171184    |
| Sma-1-8062 | NW_003037933.1 | + | 340870    | 340919    |
| Sma-1-8063 | NS_000200.1    | + | 178754042 | 178754091 |
| Sma-1-8064 | NS_000200.1    | + | 373139623 | 373139672 |

|            |                |   |           |           |
|------------|----------------|---|-----------|-----------|
| Sma-1-8065 | NS.000200.1    | - | 321003545 | 321003496 |
| Sma-1-8066 | NS.000200.1    | - | 181401057 | 181401008 |
| Sma-1-8067 | NS.000200.1    | - | 142067806 | 142067757 |
| Sma-1-8068 | NW_003037905.1 | + | 883456    | 883505    |
| Sma-1-8069 | NS.000200.1    | + | 150152468 | 150152517 |
| Sma-1-8070 | NW_003037835.1 | - | 149987    | 149938    |
| Sma-1-8071 | NS.000200.1    | - | 74546495  | 74546446  |
| Sma-1-8072 | NW_003037905.1 | - | 674734    | 674685    |
| Sma-1-8073 | NS.000200.1    | - | 149943746 | 149943697 |
| Sma-1-8074 | NW_003037980.1 | + | 1032573   | 1032622   |
| Sma-1-8075 | NS.000200.1    | + | 211993435 | 211993484 |
| Sma-1-8076 | NW_003037905.1 | - | 388485    | 388436    |
| Sma-1-8077 | NS.000200.1    | - | 149657497 | 149657448 |
| Sma-1-8078 | NW_003037943.1 | + | 1006917   | 1006966   |
| Sma-1-8079 | NS.000200.1    | + | 188028450 | 188028499 |
| Sma-1-8080 | NW_003037915.1 | - | 209659    | 209610    |
| Sma-1-8081 | NW_003037974.1 | - | 902865    | 902816    |
| Sma-1-8082 | NS.000200.1    | - | 205578171 | 205578122 |
| Sma-1-8083 | NS.000200.1    | - | 162109645 | 162109596 |
| Sma-1-8084 | NW_003037853.1 | + | 115358    | 115407    |
| Sma-1-8085 | NS.000200.1    | + | 95607409  | 95607458  |
| Sma-1-8086 | NW_003037918.1 | - | 508493    | 508444    |
| Sma-1-8087 | NS.000200.1    | - | 167075483 | 167075434 |
| Sma-1-8088 | NW_003037970.1 | + | 357055    | 357104    |
| Sma-1-8089 | NS.000200.1    | + | 201413245 | 201413294 |
| Sma-1-8090 | NW_003038007.1 | - | 285073    | 285024    |
| Sma-1-8091 | NS.000200.1    | - | 225533628 | 225533579 |
| Sma-1-8092 | NW_003037962.1 | + | 527671    | 527720    |
| Sma-1-8093 | NW_003038033.1 | - | 556241    | 556192    |
| Sma-1-8094 | NW_003038037.1 | - | 1178058   | 1178009   |
| Sma-1-8095 | NS.000200.1    | + | 196604514 | 196604563 |
| Sma-1-8096 | NS.000200.1    | - | 251333467 | 251333418 |
| Sma-1-8097 | NS.000200.1    | - | 246536243 | 246536194 |
| Sma-1-8098 | NW_003037815.1 | - | 452357    | 452308    |
| Sma-1-8099 | NS.000200.1    | - | 45715348  | 45715299  |
| Sma-1-8100 | NW_003037819.1 | + | 162733    | 162782    |
| Sma-1-8101 | NS.000200.1    | + | 51250998  | 51251047  |
| Sma-1-8102 | NW_003037827.1 | + | 1089358   | 1089407   |
| Sma-1-8103 | NS.000200.1    | + | 63711499  | 63711548  |
| Sma-1-8104 | NW_003037917.1 | + | 389624    | 389673    |
| Sma-1-8105 | NS.000200.1    | + | 165426428 | 165426477 |
| Sma-1-8106 | NW_003037937.1 | - | 420636    | 420587    |
| Sma-1-8107 | NS.000200.1    | - | 181620545 | 181620496 |
| Sma-1-8108 | NW_003038002.1 | - | 145991    | 145942    |
| Sma-1-8109 | NS.000200.1    | - | 223266200 | 223266151 |
| Sma-1-8110 | NW_003038261.1 | + | 202209    | 202258    |
| Sma-1-8111 | NS.000200.1    | + | 323815860 | 323815909 |
| Sma-1-8112 | NW_003038037.1 | - | 1559592   | 1559543   |
| Sma-1-8113 | NS.000200.1    | - | 251715001 | 251714952 |
| Sma-1-8114 | NW_003038242.1 | + | 34368     | 34417     |
| Sma-1-8115 | NW_003037937.1 | + | 153164    | 153213    |
| Sma-1-8116 | NW_003037844.1 | + | 653367    | 653416    |

|            |                |   |           |           |
|------------|----------------|---|-----------|-----------|
| Sma-1-8117 | NS.000200.1    | + | 86836813  | 86836862  |
| Sma-1-8118 | NS.000200.1    | + | 181353073 | 181353122 |
| Sma-1-8119 | NS.000200.1    | + | 314733514 | 314733563 |
| Sma-1-8120 | NW.003038031.1 | - | 708004    | 707955    |
| Sma-1-8121 | NS.000200.1    | - | 244985762 | 244985713 |
| Sma-1-8122 | NW.003037791.1 | - | 421695    | 421646    |
| Sma-1-8123 | NW.003038153.1 | + | 6216      | 6265      |
| Sma-1-8124 | NS.000200.1    | + | 293068265 | 293068314 |
| Sma-1-8125 | NS.000200.1    | - | 382127123 | 382127074 |
| Sma-1-8126 | NW.003038014.1 | - | 121193    | 121144    |
| Sma-1-8127 | NS.000200.1    | - | 229861882 | 229861833 |
| Sma-1-8128 | NW.003038023.1 | + | 716974    | 717023    |
| Sma-1-8129 | NS.000200.1    | + | 237877265 | 237877314 |
| Sma-1-8130 | NW.003038478.1 | + | 32685     | 32734     |
| Sma-1-8131 | NS.000200.1    | + | 332607719 | 332607768 |
| Sma-1-8132 | NW.003028247.1 | - | 968       | 919       |
| Sma-1-8133 | NW.003028876.1 | - | 1301      | 1252      |
| Sma-1-8134 | NW.003033005.1 | - | 90        | 41        |
| Sma-1-8135 | NW.003037806.1 | - | 1930648   | 1930599   |
| Sma-1-8136 | NW.003037806.1 | - | 1928469   | 1928420   |
| Sma-1-8137 | NW.003037837.1 | + | 707935    | 707984    |
| Sma-1-8138 | NW.003037854.1 | + | 1646617   | 1646666   |
| Sma-1-8139 | NW.003037882.1 | + | 388142    | 388191    |
| Sma-1-8140 | NW.003037911.1 | + | 8177      | 8226      |
| Sma-1-8141 | NW.003037914.1 | - | 651007    | 650958    |
| Sma-1-8142 | NW.003037955.1 | + | 161573    | 161622    |
| Sma-1-8143 | NW.003038023.1 | - | 409888    | 409839    |
| Sma-1-8144 | NW.003026517.1 | + | 335783    | 335832    |
| Sma-1-8145 | NW.003038077.1 | - | 65683     | 65634     |
| Sma-1-8146 | NS.000200.1    | + | 77513793  | 77513842  |
| Sma-1-8147 | NS.000200.1    | + | 98551038  | 98551087  |
| Sma-1-8148 | NS.000200.1    | + | 125679816 | 125679865 |
| Sma-1-8149 | NS.000200.1    | + | 155795530 | 155795579 |
| Sma-1-8150 | NS.000200.1    | + | 193788307 | 193788356 |
| Sma-1-8151 | NS.000200.1    | + | 299941792 | 299941841 |
| Sma-1-8152 | NS.000200.1    | - | 374383386 | 374383337 |
| Sma-1-8153 | NS.000200.1    | - | 370134163 | 370134114 |
| Sma-1-8154 | NS.000200.1    | - | 326162457 | 326162408 |
| Sma-1-8155 | NS.000200.1    | - | 266837323 | 266837274 |
| Sma-1-8156 | NS.000200.1    | - | 237570179 | 237570130 |
| Sma-1-8157 | NS.000200.1    | - | 160795257 | 160795208 |
| Sma-1-8158 | NS.000200.1    | - | 30125862  | 30125813  |
| Sma-1-8159 | NS.000200.1    | - | 30123683  | 30123634  |
| Sma-1-8160 | NW.003037985.1 | - | 136452    | 136403    |
| Sma-1-8161 | NS.000200.1    | - | 215263796 | 215263747 |
| Sma-1-8162 | NW.003037818.1 | + | 215330    | 215379    |
| Sma-1-8163 | NS.000200.1    | + | 48930737  | 48930786  |
| Sma-1-8164 | NW.003036271.1 | + | 1115      | 1164      |
| Sma-1-8165 | NW.003037798.1 | + | 2576143   | 2576192   |
| Sma-1-8166 | NW.003038151.1 | - | 220781    | 220732    |
| Sma-1-8167 | NS.000200.1    | + | 16835301  | 16835350  |
| Sma-1-8168 | NS.000200.1    | + | 359527101 | 359527150 |

|            |                |   |           |           |
|------------|----------------|---|-----------|-----------|
| Sma-1-8169 | NS.000200.1    | - | 292128024 | 292127975 |
| Sma-1-8170 | NW_003037914.1 | - | 37733     | 37684     |
| Sma-1-8171 | NS.000200.1    | - | 160181983 | 160181934 |
| Sma-1-8172 | NW_003037814.1 | - | 549843    | 549794    |
| Sma-1-8173 | NW_003037842.1 | - | 196549    | 196500    |
| Sma-1-8174 | NW_003037914.1 | - | 41044     | 40995     |
| Sma-1-8175 | NS.000200.1    | - | 160185294 | 160185245 |
| Sma-1-8176 | NS.000200.1    | - | 85295739  | 85295690  |
| Sma-1-8177 | NS.000200.1    | - | 43533703  | 43533654  |
| Sma-1-8178 | NW_003037795.1 | + | 653683    | 653732    |
| Sma-1-8179 | NS.000200.1    | + | 7044566   | 7044615   |
| Sma-1-8180 | NW_003037880.1 | - | 79892     | 79843     |
| Sma-1-8181 | NS.000200.1    | - | 123763450 | 123763401 |
| Sma-1-8182 | NW_003037810.1 | + | 112654    | 112703    |
| Sma-1-8183 | NS.000200.1    | + | 36717176  | 36717225  |
| Sma-1-8184 | NW_003037916.1 | + | 1782785   | 1782834   |
| Sma-1-8185 | NS.000200.1    | + | 164976196 | 164976245 |
| Sma-1-8186 | NW_003037925.1 | + | 63977     | 64026     |
| Sma-1-8187 | NS.000200.1    | + | 172465980 | 172466029 |
| Sma-1-8188 | NW_003037799.1 | - | 1510235   | 1510186   |
| Sma-1-8189 | NW_003038018.1 | + | 227449    | 227498    |
| Sma-1-8190 | NS.000200.1    | + | 232628299 | 232628348 |
| Sma-1-8191 | NS.000200.1    | - | 18500589  | 18500540  |
| Sma-1-8192 | NW_003038067.1 | - | 66594     | 66545     |
| Sma-1-8193 | NS.000200.1    | - | 262920647 | 262920598 |
| Sma-1-8194 | NW_003037846.1 | - | 886031    | 885982    |
| Sma-1-8195 | NS.000200.1    | - | 88520601  | 88520552  |
| Sma-1-8196 | NW_003037933.1 | - | 222502    | 222453    |
| Sma-1-8197 | NS.000200.1    | - | 178635674 | 178635625 |
| Sma-1-8198 | NW_003037942.1 | + | 96797     | 96846     |
| Sma-1-8199 | NS.000200.1    | + | 185856705 | 185856754 |
| Sma-1-8200 | NW_003029322.1 | + | 604       | 653       |
| Sma-1-8201 | NS.000200.1    | + | 357286913 | 357286962 |
| Sma-1-8202 | NW_003027744.1 | + | 488       | 537       |
| Sma-1-8203 | NS.000200.1    | + | 365868316 | 365868365 |
| Sma-1-8204 | NW_003038259.1 | + | 304063    | 304112    |
| Sma-1-8205 | NS.000200.1    | + | 323164662 | 323164711 |
| Sma-1-8206 | NW_003037806.1 | - | 1715965   | 1715916   |
| Sma-1-8207 | NS.000200.1    | - | 29911179  | 29911130  |
| Sma-1-8208 | NW_003038009.1 | + | 276093    | 276142    |
| Sma-1-8209 | NS.000200.1    | + | 226650156 | 226650205 |
| Sma-1-8210 | NW_003038012.1 | - | 358736    | 358687    |
| Sma-1-8211 | NS.000200.1    | - | 228682675 | 228682626 |
| Sma-1-8212 | NW_003037874.1 | + | 277714    | 277763    |
| Sma-1-8213 | NW_003038509.1 | - | 54332     | 54283     |
| Sma-1-8214 | NW_003038005.1 | - | 131389    | 131340    |
| Sma-1-8215 | NW_003037937.1 | + | 561828    | 561877    |
| Sma-1-8216 | NW_003032160.1 | + | 267916    | 267965    |
| Sma-1-8217 | NW_003037794.1 | + | 509311    | 509360    |
| Sma-1-8218 | NW_003037822.1 | + | 31318     | 31367     |
| Sma-1-8219 | NW_003037827.1 | - | 823389    | 823340    |
| Sma-1-8220 | NW_003037838.1 | - | 631649    | 631600    |

|            |                |   |           |           |
|------------|----------------|---|-----------|-----------|
| Sma-1-8221 | NW_003037850.1 | - | 1341342   | 1341293   |
| Sma-1-8222 | NW_003037896.1 | - | 541679    | 541630    |
| Sma-1-8223 | NW_003037910.1 | - | 987956    | 987907    |
| Sma-1-8224 | NW_003038036.1 | - | 1130502   | 1130453   |
| Sma-1-8225 | NW_003038069.1 | - | 373738    | 373689    |
| Sma-1-8226 | NW_003038240.1 | - | 207506    | 207457    |
| Sma-1-8227 | NW_003026515.1 | - | 88559     | 88510     |
| Sma-1-8228 | NW_003038046.1 | + | 112780    | 112829    |
| Sma-1-8229 | NW_003038143.1 | - | 313638    | 313589    |
| Sma-1-8230 | NS_000200.1    | + | 4688906   | 4688955   |
| Sma-1-8231 | NS_000200.1    | + | 54339324  | 54339373  |
| Sma-1-8232 | NS_000200.1    | + | 119702664 | 119702713 |
| Sma-1-8233 | NS_000200.1    | + | 181761737 | 181761786 |
| Sma-1-8234 | NS_000200.1    | + | 255186162 | 255186211 |
| Sma-1-8235 | NS_000200.1    | + | 381276002 | 381276051 |
| Sma-1-8236 | NS_000200.1    | - | 337686784 | 337686735 |
| Sma-1-8237 | NS_000200.1    | - | 314346437 | 314346388 |
| Sma-1-8238 | NS_000200.1    | - | 290732970 | 290732921 |
| Sma-1-8239 | NS_000200.1    | - | 288073130 | 288073081 |
| Sma-1-8240 | NS_000200.1    | - | 264217144 | 264217095 |
| Sma-1-8241 | NS_000200.1    | - | 250064354 | 250064305 |
| Sma-1-8242 | NS_000200.1    | - | 224537343 | 224537294 |
| Sma-1-8243 | NS_000200.1    | - | 155499931 | 155499882 |
| Sma-1-8244 | NS_000200.1    | - | 143462102 | 143462053 |
| Sma-1-8245 | NS_000200.1    | - | 93327372  | 93327323  |
| Sma-1-8246 | NS_000200.1    | - | 78630212  | 78630163  |
| Sma-1-8247 | NS_000200.1    | - | 63445530  | 63445481  |
| Sma-1-8248 | NW_003037708.1 | + | 25961     | 26010     |
| Sma-1-8249 | NS_000200.1    | + | 375745883 | 375745932 |
| Sma-1-8250 | NW_003037988.1 | - | 47377     | 47328     |
| Sma-1-8251 | NS_000200.1    | - | 216041195 | 216041146 |
| Sma-1-8252 | NW_003037996.1 | + | 336238    | 336287    |
| Sma-1-8253 | NS_000200.1    | + | 220581114 | 220581163 |
| Sma-1-8254 | NW_003037962.1 | - | 465626    | 465577    |
| Sma-1-8255 | NW_003037871.1 | + | 95615     | 95664     |
| Sma-1-8256 | NW_003037908.1 | + | 279705    | 279754    |
| Sma-1-8257 | NW_003037909.1 | - | 603390    | 603341    |
| Sma-1-8258 | NW_003037914.1 | + | 45450     | 45499     |
| Sma-1-8259 | NS_000200.1    | + | 117543353 | 117543402 |
| Sma-1-8260 | NS_000200.1    | + | 152752836 | 152752885 |
| Sma-1-8261 | NS_000200.1    | + | 160189700 | 160189749 |
| Sma-1-8262 | NS_000200.1    | - | 196542469 | 196542420 |
| Sma-1-8263 | NS_000200.1    | - | 154145039 | 154144990 |
| Sma-1-8264 | NW_003026459.1 | + | 225848    | 225897    |
| Sma-1-8265 | NS_000200.1    | + | 141871121 | 141871170 |
| Sma-1-8266 | NW_003035642.1 | - | 22723     | 22674     |
| Sma-1-8267 | NS_000200.1    | - | 330280399 | 330280350 |
| Sma-1-8268 | NW_003038152.1 | + | 424667    | 424716    |
| Sma-1-8269 | NS_000200.1    | + | 293030391 | 293030440 |
| Sma-1-8270 | NW_003039127.1 | + | 1228478   | 1228527   |
| Sma-1-8271 | NS_000200.1    | + | 114305977 | 114306026 |
| Sma-1-8272 | NW_003037860.1 | + | 777063    | 777112    |

|            |                |   |           |           |
|------------|----------------|---|-----------|-----------|
| Sma-1-8273 | NS.000200.1    | + | 104520091 | 104520140 |
| Sma-1-8274 | NW_003037868.1 | + | 113815    | 113864    |
| Sma-1-8275 | NS.000200.1    | + | 116085527 | 116085576 |
| Sma-1-8276 | NW_003037854.1 | + | 388459    | 388508    |
| Sma-1-8277 | NW_003037854.1 | - | 390563    | 390514    |
| Sma-1-8278 | NS.000200.1    | + | 97292880  | 97292929  |
| Sma-1-8279 | NS.000200.1    | - | 97294984  | 97294935  |
| Sma-1-8280 | NW_003037890.1 | - | 1326021   | 1325972   |
| Sma-1-8281 | NS.000200.1    | - | 137009382 | 137009333 |
| Sma-1-8282 | NW_003037853.1 | + | 650966    | 651015    |
| Sma-1-8283 | NS.000200.1    | + | 96143017  | 96143066  |
| Sma-1-8284 | NW_003037824.1 | - | 923066    | 923017    |
| Sma-1-8285 | NW_003037977.1 | - | 954611    | 954562    |
| Sma-1-8286 | NS.000200.1    | - | 209240631 | 209240582 |
| Sma-1-8287 | NS.000200.1    | - | 57854006  | 57853957  |
| Sma-1-8288 | NW_003037806.1 | + | 1900599   | 1900648   |
| Sma-1-8289 | NS.000200.1    | + | 30095813  | 30095862  |
| Sma-1-8290 | NW_003038230.1 | + | 152091    | 152140    |
| Sma-1-8291 | NS.000200.1    | + | 311437662 | 311437711 |
| Sma-1-8292 | NW_003037797.1 | + | 13100     | 13149     |
| Sma-1-8293 | NS.000200.1    | + | 10440960  | 10441009  |
| Sma-1-8294 | NW_003037940.1 | + | 915014    | 915063    |
| Sma-1-8295 | NS.000200.1    | + | 184657144 | 184657193 |
| Sma-1-8296 | NW_003035874.1 | + | 26436     | 26485     |
| Sma-1-8297 | NW_003026458.1 | + | 372185    | 372234    |
| Sma-1-8298 | NS.000200.1    | + | 102240415 | 102240464 |
| Sma-1-8299 | NS.000200.1    | + | 336003980 | 336004029 |
| Sma-1-8300 | NW_003037945.1 | - | 749844    | 749795    |
| Sma-1-8301 | NS.000200.1    | - | 189851808 | 189851759 |
| Sma-1-8302 | NW_003037969.1 | + | 209368    | 209417    |
| Sma-1-8303 | NS.000200.1    | + | 200815495 | 200815544 |
| Sma-1-8304 | NW_003037997.1 | + | 409372    | 409421    |
| Sma-1-8305 | NW_003038032.1 | - | 803486    | 803437    |
| Sma-1-8306 | NW_003038117.1 | - | 178538    | 178489    |
| Sma-1-8307 | NS.000200.1    | + | 221220814 | 221220863 |
| Sma-1-8308 | NS.000200.1    | - | 277496363 | 277496314 |
| Sma-1-8309 | NS.000200.1    | - | 245962646 | 245962597 |
| Sma-1-8310 | NW_003039127.1 | - | 2285651   | 2285602   |
| Sma-1-8311 | NS.000200.1    | - | 115363150 | 115363101 |
| Sma-1-8312 | NW_003036831.1 | + | 815       | 864       |
| Sma-1-8313 | NW_003037827.1 | - | 2204539   | 2204490   |
| Sma-1-8314 | NW_003037859.1 | + | 997648    | 997697    |
| Sma-1-8315 | NW_003037862.1 | + | 272407    | 272456    |
| Sma-1-8316 | NS.000200.1    | + | 103676489 | 103676538 |
| Sma-1-8317 | NS.000200.1    | + | 105924068 | 105924117 |
| Sma-1-8318 | NS.000200.1    | + | 347810507 | 347810556 |
| Sma-1-8319 | NS.000200.1    | - | 64826680  | 64826631  |
| Sma-1-8320 | NW_003026504.1 | + | 43705     | 43754     |
| Sma-1-8321 | NS.000200.1    | + | 276960471 | 276960520 |
| Sma-1-8322 | NW_003037986.1 | - | 49934     | 49885     |
| Sma-1-8323 | NS.000200.1    | - | 215466686 | 215466637 |
| Sma-1-8324 | NW_003023469.1 | + | 239       | 288       |

|            |                |   |           |           |
|------------|----------------|---|-----------|-----------|
| Sma-1-8325 | NW_003037966.1 | - | 13533     | 13484     |
| Sma-1-8326 | NW_003038032.1 | - | 673911    | 673862    |
| Sma-1-8327 | NS_000200.1    | + | 373464649 | 373464698 |
| Sma-1-8328 | NS_000200.1    | - | 245833071 | 245833022 |
| Sma-1-8329 | NS_000200.1    | - | 198715396 | 198715347 |
| Sma-1-8330 | NW_003038073.1 | - | 297746    | 297697    |
| Sma-1-8331 | NW_003037812.1 | + | 1262740   | 1262789   |
| Sma-1-8332 | NW_003038015.1 | - | 467546    | 467497    |
| Sma-1-8333 | NW_003038036.1 | - | 1002842   | 1002793   |
| Sma-1-8334 | NS_000200.1    | + | 40745479  | 40745528  |
| Sma-1-8335 | NS_000200.1    | - | 265820179 | 265820130 |
| Sma-1-8336 | NS_000200.1    | - | 249936694 | 249936645 |
| Sma-1-8337 | NS_000200.1    | - | 230791036 | 230790987 |
| Sma-1-8338 | NW_003038037.1 | + | 51560     | 51609     |
| Sma-1-8339 | NS_000200.1    | + | 250206969 | 250207018 |
| Sma-1-8340 | NW_003028049.1 | + | 937       | 986       |
| Sma-1-8341 | NW_003034042.1 | + | 85        | 134       |
| Sma-1-8342 | NW_003038509.1 | + | 283359    | 283408    |
| Sma-1-8343 | NW_003037800.1 | + | 60097     | 60146     |
| Sma-1-8344 | NW_003037807.1 | + | 516474    | 516523    |
| Sma-1-8345 | NW_003037809.1 | + | 2298416   | 2298465   |
| Sma-1-8346 | NW_003037822.1 | + | 1592337   | 1592386   |
| Sma-1-8347 | NW_003037823.1 | + | 677651    | 677700    |
| Sma-1-8348 | NW_003037827.1 | - | 229814    | 229765    |
| Sma-1-8349 | NW_003037831.1 | + | 1240985   | 1241034   |
| Sma-1-8350 | NW_003037831.1 | - | 881024    | 880975    |
| Sma-1-8351 | NW_003037840.1 | + | 238351    | 238400    |
| Sma-1-8352 | NW_003037846.1 | + | 426720    | 426769    |
| Sma-1-8353 | NW_003037851.1 | + | 282914    | 282963    |
| Sma-1-8354 | NW_003037869.1 | + | 64360     | 64409     |
| Sma-1-8355 | NW_003037881.1 | - | 134762    | 134713    |
| Sma-1-8356 | NW_003037918.1 | - | 1845649   | 1845600   |
| Sma-1-8357 | NW_003037964.1 | - | 638506    | 638457    |
| Sma-1-8358 | NW_003038020.1 | + | 525306    | 525355    |
| Sma-1-8359 | NW_003038081.1 | + | 84602     | 84651     |
| Sma-1-8360 | NS_000200.1    | + | 18689457  | 18689506  |
| Sma-1-8361 | NS_000200.1    | + | 30777990  | 30778039  |
| Sma-1-8362 | NS_000200.1    | + | 35962880  | 35962929  |
| Sma-1-8363 | NS_000200.1    | + | 55900343  | 55900392  |
| Sma-1-8364 | NS_000200.1    | + | 56594270  | 56594319  |
| Sma-1-8365 | NS_000200.1    | + | 70690287  | 70690336  |
| Sma-1-8366 | NS_000200.1    | + | 80861675  | 80861724  |
| Sma-1-8367 | NS_000200.1    | + | 88061290  | 88061339  |
| Sma-1-8368 | NS_000200.1    | + | 93686224  | 93686273  |
| Sma-1-8369 | NS_000200.1    | + | 116536705 | 116536754 |
| Sma-1-8370 | NS_000200.1    | + | 234492650 | 234492699 |
| Sma-1-8371 | NS_000200.1    | + | 269246645 | 269246694 |
| Sma-1-8372 | NS_000200.1    | + | 337915811 | 337915860 |
| Sma-1-8373 | NS_000200.1    | + | 363574049 | 363574098 |
| Sma-1-8374 | NS_000200.1    | + | 369235392 | 369235441 |
| Sma-1-8375 | NS_000200.1    | - | 198240028 | 198239979 |
| Sma-1-8376 | NS_000200.1    | - | 168412639 | 168412590 |

|            |                |   |           |           |
|------------|----------------|---|-----------|-----------|
| Sma-1-8377 | NS_000200.1    | - | 124566553 | 124566504 |
| Sma-1-8378 | NS_000200.1    | - | 70330326  | 70330277  |
| Sma-1-8379 | NS_000200.1    | - | 62851955  | 62851906  |
| Sma-1-8380 | NW_003037611.1 | - | 1239      | 1190      |
| Sma-1-8381 | NW_003037822.1 | + | 951765    | 951814    |
| Sma-1-8382 | NS_000200.1    | + | 55259771  | 55259820  |
| Sma-1-8383 | NS_000200.1    | - | 373369616 | 373369567 |
| Sma-1-8384 | NW_003037800.1 | - | 2029325   | 2029276   |
| Sma-1-8385 | NW_003037975.1 | + | 450448    | 450497    |
| Sma-1-8386 | NS_000200.1    | + | 206032672 | 206032721 |
| Sma-1-8387 | NS_000200.1    | - | 20658685  | 20658636  |
| Sma-1-8388 | NW_003037870.1 | - | 498898    | 498849    |
| Sma-1-8389 | NS_000200.1    | - | 117372563 | 117372514 |
| Sma-1-8390 | NW_003037853.1 | - | 590623    | 590574    |
| Sma-1-8391 | NS_000200.1    | - | 96082674  | 96082625  |
| Sma-1-8392 | NW_003037852.1 | - | 672649    | 672600    |
| Sma-1-8393 | NS_000200.1    | - | 95064544  | 95064495  |
| Sma-1-8394 | NW_003038155.1 | + | 406111    | 406160    |
| Sma-1-8395 | NS_000200.1    | + | 294529229 | 294529278 |
| Sma-1-8396 | NW_003037807.1 | + | 998470    | 998519    |
| Sma-1-8397 | NS_000200.1    | + | 31259986  | 31260035  |
| Sma-1-8398 | NW_003037917.1 | - | 632170    | 632121    |
| Sma-1-8399 | NS_000200.1    | - | 165668974 | 165668925 |
| Sma-1-8400 | NW_003037796.1 | + | 351488    | 351537    |
| Sma-1-8401 | NS_000200.1    | + | 8561132   | 8561181   |
| Sma-1-8402 | NW_003030849.1 | - | 1613      | 1564      |
| Sma-1-8403 | NS_000200.1    | - | 370366029 | 370365980 |
| Sma-1-8404 | NW_003038155.1 | + | 245657    | 245706    |
| Sma-1-8405 | NS_000200.1    | + | 294368775 | 294368824 |
| Sma-1-8406 | NW_003026462.1 | + | 41404     | 41453     |
| Sma-1-8407 | NW_003037793.1 | - | 3820752   | 3820703   |
| Sma-1-8408 | NW_003038012.1 | + | 369183    | 369232    |
| Sma-1-8409 | NW_003038014.1 | - | 243952    | 243903    |
| Sma-1-8410 | NS_000200.1    | + | 196708907 | 196708956 |
| Sma-1-8411 | NS_000200.1    | + | 228693122 | 228693171 |
| Sma-1-8412 | NS_000200.1    | - | 229984641 | 229984592 |
| Sma-1-8413 | NS_000200.1    | - | 3820752   | 3820703   |
| Sma-1-8414 | NW_003038079.1 | - | 34064     | 34015     |
| Sma-1-8415 | NS_000200.1    | - | 268164052 | 268164003 |
| Sma-1-8416 | NW_003029086.1 | - | 818       | 769       |
| Sma-1-8417 | NW_003038516.1 | + | 27797     | 27846     |
| Sma-1-8418 | NW_003026470.1 | - | 78414     | 78365     |
| Sma-1-8419 | NW_003037808.1 | + | 1405017   | 1405066   |
| Sma-1-8420 | NW_003037904.1 | - | 469512    | 469463    |
| Sma-1-8421 | NW_003037928.1 | + | 387023    | 387072    |
| Sma-1-8422 | NW_003038037.1 | - | 1158054   | 1158005   |
| Sma-1-8423 | NW_003038153.1 | - | 574955    | 574906    |
| Sma-1-8424 | NS_000200.1    | + | 33191654  | 33191703  |
| Sma-1-8425 | NS_000200.1    | + | 174710976 | 174711025 |
| Sma-1-8426 | NS_000200.1    | + | 340516202 | 340516251 |
| Sma-1-8427 | NS_000200.1    | - | 375355544 | 375355495 |
| Sma-1-8428 | NS_000200.1    | - | 293637004 | 293636955 |



|            |                |   |           |           |
|------------|----------------|---|-----------|-----------|
| Sma-1-8429 | NS_000200.1    | - | 251313463 | 251313414 |
| Sma-1-8430 | NS_000200.1    | - | 219202383 | 219202334 |
| Sma-1-8431 | NS_000200.1    | - | 149184011 | 149183962 |
| Sma-1-8432 | NW_003039129.1 | + | 134737    | 134786    |
| Sma-1-8433 | NS_000200.1    | + | 229089545 | 229089594 |
| Sma-1-8434 | NW_003038249.1 | + | 64882     | 64931     |
| Sma-1-8435 | NS_000200.1    | + | 316747135 | 316747184 |
| Sma-1-8436 | NW_003037915.1 | + | 814209    | 814258    |
| Sma-1-8437 | NW_003038058.1 | - | 191416    | 191367    |
| Sma-1-8438 | NS_000200.1    | + | 162714195 | 162714244 |
| Sma-1-8439 | NS_000200.1    | - | 260022616 | 260022567 |
| Sma-1-8440 | NW_003037818.1 | + | 1310470   | 1310519   |
| Sma-1-8441 | NS_000200.1    | + | 50025877  | 50025926  |
| Sma-1-8442 | NW_003037917.1 | - | 1504993   | 1504944   |
| Sma-1-8443 | NS_000200.1    | - | 166541797 | 166541748 |
| Sma-1-8444 | NW_003037939.1 | + | 497390    | 497439    |
| Sma-1-8445 | NS_000200.1    | + | 183367144 | 183367193 |
| Sma-1-8446 | NW_003037804.1 | - | 763473    | 763424    |
| Sma-1-8447 | NW_003037939.1 | + | 558585    | 558634    |
| Sma-1-8448 | NW_003026504.1 | + | 69698     | 69747     |
| Sma-1-8449 | NS_000200.1    | + | 183428339 | 183428388 |
| Sma-1-8450 | NS_000200.1    | + | 276986464 | 276986513 |
| Sma-1-8451 | NS_000200.1    | - | 25903493  | 25903444  |
| Sma-1-8452 | NW_003037874.1 | - | 502061    | 502012    |
| Sma-1-8453 | NS_000200.1    | - | 119927011 | 119926962 |
| Sma-1-8454 | NW_003037875.1 | - | 327820    | 327771    |
| Sma-1-8455 | NW_003026604.1 | - | 64329     | 64280     |
| Sma-1-8456 | NW_003038079.1 | + | 51419     | 51468     |
| Sma-1-8457 | NS_000200.1    | + | 268181407 | 268181456 |
| Sma-1-8458 | NS_000200.1    | - | 307309886 | 307309837 |
| Sma-1-8459 | NS_000200.1    | - | 120356489 | 120356440 |
| Sma-1-8460 | NW_003037874.1 | + | 599052    | 599101    |
| Sma-1-8461 | NS_000200.1    | + | 120024002 | 120024051 |
| Sma-1-8462 | NW_003037914.1 | - | 1227845   | 1227796   |
| Sma-1-8463 | NS_000200.1    | - | 161372095 | 161372046 |
| Sma-1-8464 | NW_003037818.1 | - | 1310086   | 1310037   |
| Sma-1-8465 | NS_000200.1    | - | 50025493  | 50025444  |
| Sma-1-8466 | NW_003037868.1 | - | 278875    | 278826    |
| Sma-1-8467 | NS_000200.1    | - | 116250587 | 116250538 |
| Sma-1-8468 | NW_003037886.1 | + | 1167366   | 1167415   |
| Sma-1-8469 | NS_000200.1    | + | 130422933 | 130422982 |
| Sma-1-8470 | NW_003037864.1 | + | 23551     | 23600     |
| Sma-1-8471 | NS_000200.1    | + | 108516125 | 108516174 |
| Sma-1-8472 | NW_003037862.1 | + | 7987      | 8036      |
| Sma-1-8473 | NS_000200.1    | + | 105659648 | 105659697 |
| Sma-1-8474 | NW_003037862.1 | + | 237926    | 237975    |
| Sma-1-8475 | NS_000200.1    | + | 105889587 | 105889636 |
| Sma-1-8476 | NW_003037861.1 | - | 462320    | 462271    |
| Sma-1-8477 | NS_000200.1    | - | 105238774 | 105238725 |
| Sma-1-8478 | NW_003037831.1 | + | 1314129   | 1314178   |
| Sma-1-8479 | NS_000200.1    | + | 70763431  | 70763480  |
| Sma-1-8480 | NW_003037851.1 | - | 898718    | 898669    |

|            |                |   |           |           |
|------------|----------------|---|-----------|-----------|
| Sma-1-8481 | NS_000200.1    | - | 94302028  | 94301979  |
| Sma-1-8482 | NW_003037912.1 | + | 1281277   | 1281326   |
| Sma-1-8483 | NS_000200.1    | + | 158092852 | 158092901 |
| Sma-1-8484 | NW_003037913.1 | - | 1151903   | 1151854   |
| Sma-1-8485 | NW_003037933.1 | + | 74441     | 74490     |
| Sma-1-8486 | NS_000200.1    | + | 178487613 | 178487662 |
| Sma-1-8487 | NS_000200.1    | - | 159715654 | 159715605 |
| Sma-1-8488 | NW_003037916.1 | + | 1815549   | 1815598   |
| Sma-1-8489 | NS_000200.1    | + | 165008960 | 165009009 |
| Sma-1-8490 | NW_003037797.1 | + | 1636765   | 1636814   |
| Sma-1-8491 | NS_000200.1    | + | 12064625  | 12064674  |
| Sma-1-8492 | NW_003037852.1 | + | 460288    | 460337    |
| Sma-1-8493 | NS_000200.1    | + | 94852183  | 94852232  |
| Sma-1-8494 | NW_003037917.1 | - | 416984    | 416935    |
| Sma-1-8495 | NS_000200.1    | - | 165453788 | 165453739 |
| Sma-1-8496 | NW_003037929.1 | + | 52729     | 52778     |
| Sma-1-8497 | NS_000200.1    | + | 175293507 | 175293556 |
| Sma-1-8498 | NW_003035879.1 | - | 128634    | 128585    |
| Sma-1-8499 | NW_003035879.1 | - | 128069    | 128020    |
| Sma-1-8500 | NS_000200.1    | - | 338095961 | 338095912 |
| Sma-1-8501 | NS_000200.1    | - | 338095396 | 338095347 |
| Sma-1-8502 | NW_003035870.1 | + | 48875     | 48924     |
| Sma-1-8503 | NS_000200.1    | + | 335414164 | 335414213 |
| Sma-1-8504 | NW_003026469.1 | - | 151215    | 151166    |
| Sma-1-8505 | NS_000200.1    | - | 217772874 | 217772825 |
| Sma-1-8506 | NW_003037812.1 | - | 876394    | 876345    |
| Sma-1-8507 | NW_003038020.1 | - | 687994    | 687945    |
| Sma-1-8508 | NS_000200.1    | - | 234655338 | 234655289 |
| Sma-1-8509 | NS_000200.1    | - | 40359133  | 40359084  |
| Sma-1-8510 | NW_003037795.1 | + | 879342    | 879391    |
| Sma-1-8511 | NS_000200.1    | + | 7270225   | 7270274   |
| Sma-1-8512 | NW_003037937.1 | - | 119645    | 119596    |
| Sma-1-8513 | NW_003037937.1 | - | 117876    | 117827    |
| Sma-1-8514 | NS_000200.1    | - | 181319554 | 181319505 |
| Sma-1-8515 | NS_000200.1    | - | 181317785 | 181317736 |
| Sma-1-8516 | NW_003037940.1 | - | 257423    | 257374    |
| Sma-1-8517 | NS_000200.1    | - | 183999553 | 183999504 |
| Sma-1-8518 | NW_003037978.1 | - | 336640    | 336591    |
| Sma-1-8519 | NS_000200.1    | - | 209604650 | 209604601 |
| Sma-1-8520 | NW_003038512.1 | - | 278348    | 278299    |
| Sma-1-8521 | NS_000200.1    | - | 338835045 | 338834996 |
| Sma-1-8522 | NW_003038003.1 | - | 580008    | 579959    |
| Sma-1-8523 | NS_000200.1    | - | 224079290 | 224079241 |
| Sma-1-8524 | NW_003038478.1 | + | 26572     | 26621     |
| Sma-1-8525 | NW_003038032.1 | - | 81002     | 80953     |
| Sma-1-8526 | NS_000200.1    | + | 332601606 | 332601655 |
| Sma-1-8527 | NS_000200.1    | - | 245240162 | 245240113 |
| Sma-1-8528 | NW_003020378.1 | + | 832       | 881       |
| Sma-1-8529 | NS_000200.1    | + | 355001029 | 355001078 |
| Sma-1-8530 | NW_003026474.1 | - | 164757    | 164708    |
| Sma-1-8531 | NS_000200.1    | - | 253363332 | 253363283 |
| Sma-1-8532 | NW_003037976.1 | + | 570613    | 570662    |

|            |                |   |           |           |
|------------|----------------|---|-----------|-----------|
| Sma-1-8533 | NS.000200.1    | + | 207184928 | 207184977 |
| Sma-1-8534 | NW_003038478.1 | - | 26424     | 26375     |
| Sma-1-8535 | NS.000200.1    | - | 332601458 | 332601409 |
| Sma-1-8536 | NW_003037809.1 | + | 2786860   | 2786909   |
| Sma-1-8537 | NW_003037863.1 | + | 1447403   | 1447452   |
| Sma-1-8538 | NW_003038038.1 | - | 272410    | 272361    |
| Sma-1-8539 | NS.000200.1    | + | 36451324  | 36451373  |
| Sma-1-8540 | NS.000200.1    | + | 108205770 | 108205819 |
| Sma-1-8541 | NS.000200.1    | - | 252175803 | 252175754 |
| Sma-1-8542 | NW_003026617.1 | + | 184611    | 184660    |
| Sma-1-8543 | NW_003037797.1 | - | 16915     | 16866     |
| Sma-1-8544 | NW_003037816.1 | - | 2978      | 2929      |
| Sma-1-8545 | NW_003037824.1 | + | 186027    | 186076    |
| Sma-1-8546 | NW_003037824.1 | - | 70613     | 70564     |
| Sma-1-8547 | NW_003037826.1 | - | 1621818   | 1621769   |
| Sma-1-8548 | NW_003037830.1 | - | 189390    | 189341    |
| Sma-1-8549 | NW_003037840.1 | + | 1629036   | 1629085   |
| Sma-1-8550 | NW_003037896.1 | + | 533769    | 533818    |
| Sma-1-8551 | NW_003037904.1 | + | 115274    | 115323    |
| Sma-1-8552 | NW_003037941.1 | - | 649214    | 649165    |
| Sma-1-8553 | NW_003037976.1 | - | 582544    | 582495    |
| Sma-1-8554 | NW_003037978.1 | - | 342890    | 342841    |
| Sma-1-8555 | NW_003038038.1 | + | 320096    | 320145    |
| Sma-1-8556 | NW_003038261.1 | + | 553299    | 553348    |
| Sma-1-8557 | NW_003026510.1 | + | 77614     | 77663     |
| Sma-1-8558 | NW_003038187.1 | + | 56808     | 56857     |
| Sma-1-8559 | NS.000200.1    | + | 57116967  | 57117016  |
| Sma-1-8560 | NS.000200.1    | + | 82252360  | 82252409  |
| Sma-1-8561 | NS.000200.1    | + | 143454192 | 143454241 |
| Sma-1-8562 | NS.000200.1    | + | 148829773 | 148829822 |
| Sma-1-8563 | NS.000200.1    | + | 252223489 | 252223538 |
| Sma-1-8564 | NS.000200.1    | + | 283517795 | 283517844 |
| Sma-1-8565 | NS.000200.1    | + | 302008666 | 302008715 |
| Sma-1-8566 | NS.000200.1    | + | 319755470 | 319755519 |
| Sma-1-8567 | NS.000200.1    | + | 324166950 | 324166999 |
| Sma-1-8568 | NS.000200.1    | - | 209610900 | 209610851 |
| Sma-1-8569 | NS.000200.1    | - | 207196859 | 207196810 |
| Sma-1-8570 | NS.000200.1    | - | 185383688 | 185383639 |
| Sma-1-8571 | NS.000200.1    | - | 68079761  | 68079712  |
| Sma-1-8572 | NS.000200.1    | - | 62621334  | 62621285  |
| Sma-1-8573 | NS.000200.1    | - | 57001553  | 57001504  |
| Sma-1-8574 | NS.000200.1    | - | 46211850  | 46211801  |
| Sma-1-8575 | NS.000200.1    | - | 10444775  | 10444726  |
| Sma-1-8576 | NW_003037977.1 | + | 805822    | 805871    |
| Sma-1-8577 | NS.000200.1    | + | 209091842 | 209091891 |
| Sma-1-8578 | NW_003038518.1 | + | 482910    | 482959    |
| Sma-1-8579 | NS.000200.1    | + | 342119743 | 342119792 |
| Sma-1-8580 | NW_003038028.1 | + | 153884    | 153933    |
| Sma-1-8581 | NS.000200.1    | + | 241461458 | 241461507 |
| Sma-1-8582 | NW_003038037.1 | + | 602815    | 602864    |
| Sma-1-8583 | NS.000200.1    | + | 250758224 | 250758273 |
| Sma-1-8584 | NW_003035578.1 | + | 8956      | 9005      |

|            |                |   |           |           |
|------------|----------------|---|-----------|-----------|
| Sma-1-8585 | NW_003037839.1 | - | 1183502   | 1183453   |
| Sma-1-8586 | NW_003037858.1 | - | 818370    | 818321    |
| Sma-1-8587 | NW_003037864.1 | + | 27095     | 27144     |
| Sma-1-8588 | NW_003037896.1 | - | 443154    | 443105    |
| Sma-1-8589 | NW_003026481.1 | + | 41372     | 41421     |
| Sma-1-8590 | NW_003038074.1 | + | 111762    | 111811    |
| Sma-1-8591 | NS_000200.1    | + | 108519669 | 108519718 |
| Sma-1-8592 | NS_000200.1    | + | 255441356 | 255441405 |
| Sma-1-8593 | NS_000200.1    | + | 266003142 | 266003191 |
| Sma-1-8594 | NS_000200.1    | + | 329034287 | 329034336 |
| Sma-1-8595 | NS_000200.1    | - | 143363577 | 143363528 |
| Sma-1-8596 | NS_000200.1    | - | 101482646 | 101482597 |
| Sma-1-8597 | NS_000200.1    | - | 80141652  | 80141603  |
| Sma-1-8598 | NW_003038254.1 | - | 239264    | 239215    |
| Sma-1-8599 | NS_000200.1    | - | 320274822 | 320274773 |
| Sma-1-8600 | NW_003038011.1 | + | 65825     | 65874     |
| Sma-1-8601 | NS_000200.1    | + | 227593475 | 227593524 |
| Sma-1-8602 | NW_003029713.1 | - | 1049      | 1000      |
| Sma-1-8603 | NW_003035393.1 | + | 1005      | 1054      |
| Sma-1-8604 | NW_003026466.1 | + | 70136     | 70185     |
| Sma-1-8605 | NW_003037794.1 | + | 827786    | 827835    |
| Sma-1-8606 | NW_003038037.1 | - | 1497602   | 1497553   |
| Sma-1-8607 | NW_003038087.1 | + | 14958     | 15007     |
| Sma-1-8608 | NS_000200.1    | + | 5007381   | 5007430   |
| Sma-1-8609 | NS_000200.1    | + | 215337243 | 215337292 |
| Sma-1-8610 | NS_000200.1    | + | 273043359 | 273043408 |
| Sma-1-8611 | NS_000200.1    | + | 367391011 | 367391060 |
| Sma-1-8612 | NS_000200.1    | - | 366467997 | 366467948 |
| Sma-1-8613 | NS_000200.1    | - | 251653011 | 251652962 |
| Sma-1-8614 | NW_003037807.1 | - | 127814    | 127765    |
| Sma-1-8615 | NS_000200.1    | - | 30389330  | 30389281  |
| Sma-1-8616 | NW_003037824.1 | - | 847877    | 847828    |
| Sma-1-8617 | NS_000200.1    | - | 57778817  | 57778768  |
| Sma-1-8618 | NW_003037853.1 | + | 827594    | 827643    |
| Sma-1-8619 | NW_003037869.1 | + | 100747    | 100796    |
| Sma-1-8620 | NS_000200.1    | + | 96319645  | 96319694  |
| Sma-1-8621 | NS_000200.1    | + | 116573092 | 116573141 |
| Sma-1-8622 | NW_003037888.1 | - | 930552    | 930503    |
| Sma-1-8623 | NS_000200.1    | - | 133139044 | 133138995 |
| Sma-1-8624 | NW_003037888.1 | + | 930910    | 930959    |
| Sma-1-8625 | NS_000200.1    | + | 133139402 | 133139451 |
| Sma-1-8626 | NW_003037889.1 | + | 114958    | 115007    |
| Sma-1-8627 | NS_000200.1    | + | 133891448 | 133891497 |
| Sma-1-8628 | NW_003037889.1 | + | 365661    | 365710    |
| Sma-1-8629 | NS_000200.1    | + | 134142151 | 134142200 |
| Sma-1-8630 | NW_003037889.1 | + | 504981    | 505030    |
| Sma-1-8631 | NS_000200.1    | + | 134281471 | 134281520 |
| Sma-1-8632 | NW_003037854.1 | - | 1198812   | 1198763   |
| Sma-1-8633 | NS_000200.1    | - | 98103233  | 98103184  |
| Sma-1-8634 | NW_003037853.1 | - | 985219    | 985170    |
| Sma-1-8635 | NS_000200.1    | - | 96477270  | 96477221  |
| Sma-1-8636 | NW_003037853.1 | - | 477169    | 477120    |

|            |                |   |           |           |
|------------|----------------|---|-----------|-----------|
| Sma-1-8637 | NS.000200.1    | - | 95969220  | 95969171  |
| Sma-1-8638 | NW_003037850.1 | + | 178036    | 178085    |
| Sma-1-8639 | NS.000200.1    | + | 92164066  | 92164115  |
| Sma-1-8640 | NW_003037849.1 | + | 88954     | 89003     |
| Sma-1-8641 | NS.000200.1    | + | 91065227  | 91065276  |
| Sma-1-8642 | NW_003037849.1 | + | 188962    | 189011    |
| Sma-1-8643 | NS.000200.1    | + | 91165235  | 91165284  |
| Sma-1-8644 | NW_003037891.1 | + | 457988    | 458037    |
| Sma-1-8645 | NS.000200.1    | + | 138339266 | 138339315 |
| Sma-1-8646 | NW_003037893.1 | - | 39646     | 39597     |
| Sma-1-8647 | NW_003037943.1 | - | 350971    | 350922    |
| Sma-1-8648 | NW_003038135.1 | - | 105089    | 105040    |
| Sma-1-8649 | NW_003038163.1 | + | 95542     | 95591     |
| Sma-1-8650 | NS.000200.1    | + | 298495822 | 298495871 |
| Sma-1-8651 | NS.000200.1    | - | 283977428 | 283977379 |
| Sma-1-8652 | NS.000200.1    | - | 187372504 | 187372455 |
| Sma-1-8653 | NS.000200.1    | - | 141153956 | 141153907 |
| Sma-1-8654 | NW_003037844.1 | + | 805125    | 805174    |
| Sma-1-8655 | NW_003038152.1 | - | 78669     | 78620     |
| Sma-1-8656 | NS.000200.1    | + | 86988571  | 86988620  |
| Sma-1-8657 | NS.000200.1    | - | 292684393 | 292684344 |
| Sma-1-8658 | NW_003037843.1 | - | 105626    | 105577    |
| Sma-1-8659 | NW_003037917.1 | - | 76683     | 76634     |
| Sma-1-8660 | NS.000200.1    | - | 165113487 | 165113438 |
| Sma-1-8661 | NS.000200.1    | - | 85744933  | 85744884  |
| Sma-1-8662 | NW_003037922.1 | + | 15510     | 15559     |
| Sma-1-8663 | NS.000200.1    | + | 169939507 | 169939556 |
| Sma-1-8664 | NW_003037918.1 | + | 352321    | 352370    |
| Sma-1-8665 | NS.000200.1    | + | 166919311 | 166919360 |
| Sma-1-8666 | NW_003037841.1 | - | 282034    | 281985    |
| Sma-1-8667 | NS.000200.1    | - | 82893215  | 82893166  |
| Sma-1-8668 | NW_003037916.1 | + | 1251223   | 1251272   |
| Sma-1-8669 | NS.000200.1    | + | 164444634 | 164444683 |
| Sma-1-8670 | NW_003037797.1 | - | 3383281   | 3383232   |
| Sma-1-8671 | NS.000200.1    | - | 13811141  | 13811092  |
| Sma-1-8672 | NW_003037797.1 | - | 3363854   | 3363805   |
| Sma-1-8673 | NS.000200.1    | - | 13791714  | 13791665  |
| Sma-1-8674 | NW_003037797.1 | + | 3386529   | 3386578   |
| Sma-1-8675 | NS.000200.1    | + | 13814389  | 13814438  |
| Sma-1-8676 | NW_003037875.1 | + | 400865    | 400914    |
| Sma-1-8677 | NW_003037913.1 | + | 479544    | 479593    |
| Sma-1-8678 | NW_003037913.1 | - | 479150    | 479101    |
| Sma-1-8679 | NS.000200.1    | + | 120429534 | 120429583 |
| Sma-1-8680 | NS.000200.1    | + | 159043295 | 159043344 |
| Sma-1-8681 | NS.000200.1    | - | 159042901 | 159042852 |
| Sma-1-8682 | NW_003037830.1 | - | 281391    | 281342    |
| Sma-1-8683 | NS.000200.1    | - | 68171762  | 68171713  |
| Sma-1-8684 | NW_003037843.1 | - | 335477    | 335428    |
| Sma-1-8685 | NS.000200.1    | - | 85974784  | 85974735  |
| Sma-1-8686 | NW_003037839.1 | - | 929150    | 929101    |
| Sma-1-8687 | NS.000200.1    | - | 79887300  | 79887251  |
| Sma-1-8688 | NW_003037839.1 | + | 599122    | 599171    |

|            |                |   |           |           |
|------------|----------------|---|-----------|-----------|
| Sma-1-8689 | NS.000200.1    | + | 79557272  | 79557321  |
| Sma-1-8690 | NW_003037839.1 | - | 1094375   | 1094326   |
| Sma-1-8691 | NS.000200.1    | - | 80052525  | 80052476  |
| Sma-1-8692 | NW_003037835.1 | + | 599637    | 599686    |
| Sma-1-8693 | NS.000200.1    | + | 74996145  | 74996194  |
| Sma-1-8694 | NW_003037902.1 | - | 250115    | 250066    |
| Sma-1-8695 | NS.000200.1    | - | 147005349 | 147005300 |
| Sma-1-8696 | NW_003037933.1 | - | 512151    | 512102    |
| Sma-1-8697 | NS.000200.1    | - | 178925323 | 178925274 |
| Sma-1-8698 | NW_003037821.1 | - | 774329    | 774280    |
| Sma-1-8699 | NS.000200.1    | - | 53918813  | 53918764  |
| Sma-1-8700 | NW_003037903.1 | - | 457873    | 457824    |
| Sma-1-8701 | NS.000200.1    | - | 148011954 | 148011905 |
| Sma-1-8702 | NW_003037833.1 | + | 612899    | 612948    |
| Sma-1-8703 | NW_003037854.1 | + | 1516120   | 1516169   |
| Sma-1-8704 | NS.000200.1    | + | 72803995  | 72804044  |
| Sma-1-8705 | NS.000200.1    | + | 98420541  | 98420590  |
| Sma-1-8706 | NW_003037904.1 | - | 307468    | 307419    |
| Sma-1-8707 | NS.000200.1    | - | 149021967 | 149021918 |
| Sma-1-8708 | NW_003037831.1 | + | 603230    | 603279    |
| Sma-1-8709 | NW_003038238.1 | + | 120626    | 120675    |
| Sma-1-8710 | NS.000200.1    | + | 70052532  | 70052581  |
| Sma-1-8711 | NS.000200.1    | + | 313727407 | 313727456 |
| Sma-1-8712 | NW_003037913.1 | - | 1327082   | 1327033   |
| Sma-1-8713 | NS.000200.1    | - | 159890833 | 159890784 |
| Sma-1-8714 | NW_003037831.1 | - | 944490    | 944441    |
| Sma-1-8715 | NS.000200.1    | - | 70393792  | 70393743  |
| Sma-1-8716 | NW_003038069.1 | + | 226308    | 226357    |
| Sma-1-8717 | NS.000200.1    | + | 264069714 | 264069763 |
| Sma-1-8718 | NW_003038259.1 | - | 271310    | 271261    |
| Sma-1-8719 | NS.000200.1    | - | 323131909 | 323131860 |
| Sma-1-8720 | NW_003022267.1 | - | 764       | 715       |
| Sma-1-8721 | NS.000200.1    | - | 361061638 | 361061589 |
| Sma-1-8722 | NW_003038030.1 | + | 22513     | 22562     |
| Sma-1-8723 | NS.000200.1    | + | 243158380 | 243158429 |
| Sma-1-8724 | NW_003037968.1 | - | 331617    | 331568    |
| Sma-1-8725 | NS.000200.1    | - | 200248787 | 200248738 |
| Sma-1-8726 | NW_003026616.1 | + | 29924     | 29973     |
| Sma-1-8727 | NW_003038250.1 | + | 229949    | 229998    |
| Sma-1-8728 | NW_003037901.1 | + | 790014    | 790063    |
| Sma-1-8729 | NW_003037932.1 | - | 638688    | 638639    |
| Sma-1-8730 | NW_003037945.1 | + | 508072    | 508121    |
| Sma-1-8731 | NW_003038069.1 | - | 226089    | 226040    |
| Sma-1-8732 | NW_003038083.1 | - | 466745    | 466696    |
| Sma-1-8733 | NS.000200.1    | + | 146638475 | 146638524 |
| Sma-1-8734 | NS.000200.1    | + | 189610036 | 189610085 |
| Sma-1-8735 | NS.000200.1    | + | 317386523 | 317386572 |
| Sma-1-8736 | NS.000200.1    | + | 318282626 | 318282675 |
| Sma-1-8737 | NS.000200.1    | - | 270710082 | 270710033 |
| Sma-1-8738 | NS.000200.1    | - | 264069495 | 264069446 |
| Sma-1-8739 | NS.000200.1    | - | 178171884 | 178171835 |
| Sma-1-8740 | NW_003026506.1 | - | 18115     | 18066     |

|            |                |   |           |           |
|------------|----------------|---|-----------|-----------|
| Sma-1-8741 | NS_000200.1    | - | 279579180 | 279579131 |
| Sma-1-8742 | NW_003037807.1 | - | 495516    | 495467    |
| Sma-1-8743 | NS_000200.1    | - | 30757032  | 30756983  |
| Sma-1-8744 | NW_003037873.1 | - | 73593     | 73544     |
| Sma-1-8745 | NS_000200.1    | - | 118812721 | 118812672 |
| Sma-1-8746 | NW_003037888.1 | + | 260903    | 260952    |
| Sma-1-8747 | NW_003037891.1 | - | 1026785   | 1026736   |
| Sma-1-8748 | NS_000200.1    | + | 132469395 | 132469444 |
| Sma-1-8749 | NS_000200.1    | - | 138908063 | 138908014 |
| Sma-1-8750 | NW_003037831.1 | - | 1168993   | 1168944   |
| Sma-1-8751 | NS_000200.1    | - | 70618295  | 70618246  |
| Sma-1-8752 | NW_003037905.1 | + | 829402    | 829451    |
| Sma-1-8753 | NS_000200.1    | + | 150098414 | 150098463 |
| Sma-1-8754 | NW_003038514.1 | - | 17602     | 17553     |
| Sma-1-8755 | NS_000200.1    | - | 339642141 | 339642092 |
| Sma-1-8756 | NW_003037908.1 | - | 402541    | 402492    |
| Sma-1-8757 | NS_000200.1    | - | 152875672 | 152875623 |
| Sma-1-8758 | NW_003037982.1 | + | 671975    | 672024    |
| Sma-1-8759 | NS_000200.1    | + | 214331170 | 214331219 |
| Sma-1-8760 | NW_003039127.1 | + | 1250310   | 1250359   |
| Sma-1-8761 | NS_000200.1    | + | 114327809 | 114327858 |
| Sma-1-8762 | NW_003037911.1 | + | 755992    | 756041    |
| Sma-1-8763 | NW_003037913.1 | + | 1006220   | 1006269   |
| Sma-1-8764 | NW_003038240.1 | + | 185660    | 185709    |
| Sma-1-8765 | NW_003038482.1 | - | 92904     | 92855     |
| Sma-1-8766 | NS_000200.1    | + | 156543345 | 156543394 |
| Sma-1-8767 | NS_000200.1    | + | 159569971 | 159570020 |
| Sma-1-8768 | NS_000200.1    | + | 314324591 | 314324640 |
| Sma-1-8769 | NS_000200.1    | - | 333070355 | 333070306 |
| Sma-1-8770 | NW_003037822.1 | + | 815468    | 815517    |
| Sma-1-8771 | NS_000200.1    | + | 55123474  | 55123523  |
| Sma-1-8772 | NW_003037813.1 | + | 1218817   | 1218866   |
| Sma-1-8773 | NS_000200.1    | + | 42205680  | 42205729  |
| Sma-1-8774 | NW_003038149.1 | - | 350854    | 350805    |
| Sma-1-8775 | NS_000200.1    | - | 291379467 | 291379418 |
| Sma-1-8776 | NW_003037820.1 | + | 223337    | 223386    |
| Sma-1-8777 | NW_003037917.1 | + | 505744    | 505793    |
| Sma-1-8778 | NS_000200.1    | + | 52496319  | 52496368  |
| Sma-1-8779 | NS_000200.1    | + | 165542548 | 165542597 |
| Sma-1-8780 | NW_003037809.1 | + | 1663178   | 1663227   |
| Sma-1-8781 | NS_000200.1    | + | 35327642  | 35327691  |
| Sma-1-8782 | NW_003037967.1 | + | 427170    | 427219    |
| Sma-1-8783 | NS_000200.1    | + | 199667141 | 199667190 |
| Sma-1-8784 | NW_003026598.1 | + | 8662      | 8711      |
| Sma-1-8785 | NS_000200.1    | + | 305778878 | 305778927 |
| Sma-1-8786 | NW_003038261.1 | - | 128714    | 128665    |
| Sma-1-8787 | NS_000200.1    | - | 323742365 | 323742316 |
| Sma-1-8788 | NW_003028415.1 | - | 388       | 339       |
| Sma-1-8789 | NW_003029350.1 | + | 1517      | 1566      |
| Sma-1-8790 | NW_003038000.1 | + | 34615     | 34664     |
| Sma-1-8791 | NW_003037797.1 | - | 2603352   | 2603303   |
| Sma-1-8792 | NW_003037829.1 | - | 1142533   | 1142484   |

|            |                |   |           |           |
|------------|----------------|---|-----------|-----------|
| Sma-1-8793 | NW_003037830.1 | - | 923269    | 923220    |
| Sma-1-8794 | NW_003037871.1 | + | 110861    | 110910    |
| Sma-1-8795 | NW_003037905.1 | - | 631513    | 631464    |
| Sma-1-8796 | NW_003037917.1 | + | 248750    | 248799    |
| Sma-1-8797 | NW_003038037.1 | + | 564528    | 564577    |
| Sma-1-8798 | NW_003038074.1 | + | 9290      | 9339      |
| Sma-1-8799 | NW_003038074.1 | + | 56468     | 56517     |
| Sma-1-8800 | NS_000200.1    | + | 117558599 | 117558648 |
| Sma-1-8801 | NS_000200.1    | + | 165285554 | 165285603 |
| Sma-1-8802 | NS_000200.1    | + | 222505393 | 222505442 |
| Sma-1-8803 | NS_000200.1    | + | 250719937 | 250719986 |
| Sma-1-8804 | NS_000200.1    | + | 265900670 | 265900719 |
| Sma-1-8805 | NS_000200.1    | + | 265947848 | 265947897 |
| Sma-1-8806 | NS_000200.1    | + | 357350668 | 357350717 |
| Sma-1-8807 | NS_000200.1    | - | 369571633 | 369571584 |
| Sma-1-8808 | NS_000200.1    | - | 149900525 | 149900476 |
| Sma-1-8809 | NS_000200.1    | - | 68813640  | 68813591  |
| Sma-1-8810 | NS_000200.1    | - | 67043071  | 67043022  |
| Sma-1-8811 | NS_000200.1    | - | 13031212  | 13031163  |
| Sma-1-8812 | NW_003038067.1 | + | 102034    | 102083    |
| Sma-1-8813 | NS_000200.1    | + | 262956087 | 262956136 |
| Sma-1-8814 | NW_003037804.1 | - | 412049    | 412000    |
| Sma-1-8815 | NS_000200.1    | - | 25552069  | 25552020  |
| Sma-1-8816 | NW_003037793.1 | - | 3562025   | 3561976   |
| Sma-1-8817 | NS_000200.1    | - | 3562025   | 3561976   |
| Sma-1-8818 | NW_003032078.1 | + | 16605     | 16654     |
| Sma-1-8819 | NS_000200.1    | + | 377350694 | 377350743 |
| Sma-1-8820 | NW_003038014.1 | + | 138195    | 138244    |
| Sma-1-8821 | NS_000200.1    | + | 229878884 | 229878933 |
| Sma-1-8822 | NW_003029650.1 | + | 215       | 264       |
| Sma-1-8823 | NW_003037902.1 | - | 179184    | 179135    |
| Sma-1-8824 | NS_000200.1    | + | 366350275 | 366350324 |
| Sma-1-8825 | NS_000200.1    | - | 146934418 | 146934369 |
| Sma-1-8826 | NW_003038008.1 | + | 103351    | 103400    |
| Sma-1-8827 | NS_000200.1    | + | 225776447 | 225776496 |
| Sma-1-8828 | NW_003026462.1 | + | 301089    | 301138    |
| Sma-1-8829 | NW_003038038.1 | + | 1238938   | 1238987   |
| Sma-1-8830 | NS_000200.1    | + | 196968592 | 196968641 |
| Sma-1-8831 | NS_000200.1    | + | 253142331 | 253142380 |
| Sma-1-8832 | NW_003029807.1 | - | 18286     | 18237     |
| Sma-1-8833 | NW_003037789.1 | + | 46821     | 46870     |
| Sma-1-8834 | NW_003026514.1 | + | 142415    | 142464    |
| Sma-1-8835 | NS_000200.1    | + | 288601102 | 288601151 |
| Sma-1-8836 | NS_000200.1    | + | 380831441 | 380831490 |
| Sma-1-8837 | NS_000200.1    | - | 375967646 | 375967597 |
| Sma-1-8838 | NW_003037977.1 | + | 510458    | 510507    |
| Sma-1-8839 | NS_000200.1    | + | 208796478 | 208796527 |
| Sma-1-8840 | NW_003037872.1 | + | 718459    | 718508    |
| Sma-1-8841 | NW_003037872.1 | - | 718109    | 718060    |
| Sma-1-8842 | NS_000200.1    | + | 118675465 | 118675514 |
| Sma-1-8843 | NS_000200.1    | - | 118675115 | 118675066 |
| Sma-1-8844 | NW_003037928.1 | - | 293521    | 293472    |



|            |                |   |           |           |
|------------|----------------|---|-----------|-----------|
| Sma-1-8845 | NW_003038149.1 | - | 69909     | 69860     |
| Sma-1-8846 | NS_000200.1    | - | 291098522 | 291098473 |
| Sma-1-8847 | NS_000200.1    | - | 174617474 | 174617425 |
| Sma-1-8848 | NW_003036956.1 | + | 1467      | 1516      |
| Sma-1-8849 | NS_000200.1    | + | 343552964 | 343553013 |
| Sma-1-8850 | NW_003038155.1 | + | 384550    | 384599    |
| Sma-1-8851 | NS_000200.1    | + | 294507668 | 294507717 |
| Sma-1-8852 | NW_003038135.1 | - | 231021    | 230972    |
| Sma-1-8853 | NS_000200.1    | - | 284103360 | 284103311 |
| Sma-1-8854 | NW_003037919.1 | - | 121350    | 121301    |
| Sma-1-8855 | NS_000200.1    | - | 168979279 | 168979230 |
| Sma-1-8856 | NW_003038087.1 | + | 312056    | 312105    |
| Sma-1-8857 | NS_000200.1    | + | 273340457 | 273340506 |
| Sma-1-8858 | NW_003037791.1 | - | 365558    | 365509    |
| Sma-1-8859 | NS_000200.1    | - | 382070986 | 382070937 |
| Sma-1-8860 | NW_003026456.1 | + | 658367    | 658416    |
| Sma-1-8861 | NS_000200.1    | + | 58581503  | 58581552  |
| Sma-1-8862 | NW_003038005.1 | + | 159414    | 159463    |
| Sma-1-8863 | NW_003037806.1 | - | 1902858   | 1902809   |
| Sma-1-8864 | NW_003037844.1 | + | 656391    | 656440    |
| Sma-1-8865 | NS_000200.1    | + | 86839837  | 86839886  |
| Sma-1-8866 | NS_000200.1    | + | 224565368 | 224565417 |
| Sma-1-8867 | NS_000200.1    | - | 30098072  | 30098023  |
| Sma-1-8868 | NW_003022520.1 | + | 2898      | 2947      |
| Sma-1-8869 | NS_000200.1    | + | 365102844 | 365102893 |
| Sma-1-8870 | NW_003037800.1 | - | 155788    | 155739    |
| Sma-1-8871 | NS_000200.1    | - | 18785148  | 18785099  |
| Sma-1-8872 | NW_003037818.1 | - | 912437    | 912388    |
| Sma-1-8873 | NS_000200.1    | - | 49627844  | 49627795  |
| Sma-1-8874 | NW_003037820.1 | - | 733788    | 733739    |
| Sma-1-8875 | NS_000200.1    | - | 53006770  | 53006721  |
| Sma-1-8876 | NW_003037914.1 | + | 1107144   | 1107193   |
| Sma-1-8877 | NS_000200.1    | + | 161251394 | 161251443 |
| Sma-1-8878 | NW_003026517.1 | - | 134018    | 133969    |
| Sma-1-8879 | NS_000200.1    | - | 299740027 | 299739978 |
| Sma-1-8880 | NW_003037800.1 | - | 620251    | 620202    |
| Sma-1-8881 | NS_000200.1    | - | 19249611  | 19249562  |
| Sma-1-8882 | NW_003038442.1 | - | 7190      | 7141      |
| Sma-1-8883 | NW_003037801.1 | - | 533584    | 533535    |
| Sma-1-8884 | NS_000200.1    | - | 329863243 | 329863194 |
| Sma-1-8885 | NS_000200.1    | - | 21623064  | 21623015  |
| Sma-1-8886 | NW_003026464.1 | + | 674371    | 674420    |
| Sma-1-8887 | NS_000200.1    | + | 203974680 | 203974729 |
| Sma-1-8888 | NW_003037809.1 | - | 265534    | 265485    |
| Sma-1-8889 | NS_000200.1    | - | 33929998  | 33929949  |
| Sma-1-8890 | NW_003037823.1 | - | 229708    | 229659    |
| Sma-1-8891 | NW_003038034.1 | - | 241768    | 241719    |
| Sma-1-8892 | NS_000200.1    | - | 247183524 | 247183475 |
| Sma-1-8893 | NS_000200.1    | - | 56146327  | 56146278  |
| Sma-1-8894 | NW_003037854.1 | - | 418523    | 418474    |
| Sma-1-8895 | NS_000200.1    | - | 97322944  | 97322895  |
| Sma-1-8896 | NW_003037913.1 | + | 390945    | 390994    |

|            |                |   |           |           |
|------------|----------------|---|-----------|-----------|
| Sma-1-8897 | NS_000200.1    | + | 158954696 | 158954745 |
| Sma-1-8898 | NW_003037914.1 | - | 1690566   | 1690517   |
| Sma-1-8899 | NS_000200.1    | - | 161834816 | 161834767 |
| Sma-1-8900 | NW_003037632.1 | + | 3209      | 3258      |
| Sma-1-8901 | NS_000200.1    | + | 373977789 | 373977838 |
| Sma-1-8902 | NW_003037821.1 | + | 416421    | 416470    |
| Sma-1-8903 | NS_000200.1    | + | 53560905  | 53560954  |
| Sma-1-8904 | NW_003037937.1 | + | 318379    | 318428    |
| Sma-1-8905 | NW_003037822.1 | + | 1528151   | 1528200   |
| Sma-1-8906 | NS_000200.1    | + | 55836157  | 55836206  |
| Sma-1-8907 | NS_000200.1    | + | 181518288 | 181518337 |
| Sma-1-8908 | NW_003037806.1 | - | 749232    | 749183    |
| Sma-1-8909 | NS_000200.1    | - | 28944446  | 28944397  |
| Sma-1-8910 | NW_003037805.1 | + | 1046060   | 1046109   |
| Sma-1-8911 | NS_000200.1    | + | 27603904  | 27603953  |
| Sma-1-8912 | NW_003037918.1 | + | 2208964   | 2209013   |
| Sma-1-8913 | NS_000200.1    | + | 168775954 | 168776003 |
| Sma-1-8914 | NW_003038149.1 | - | 319483    | 319434    |
| Sma-1-8915 | NS_000200.1    | - | 291348096 | 291348047 |
| Sma-1-8916 | NW_003037812.1 | + | 278289    | 278338    |
| Sma-1-8917 | NW_003037862.1 | - | 833659    | 833610    |
| Sma-1-8918 | NW_003037961.1 | + | 176810    | 176859    |
| Sma-1-8919 | NS_000200.1    | + | 39761028  | 39761077  |
| Sma-1-8920 | NS_000200.1    | + | 195801052 | 195801101 |
| Sma-1-8921 | NS_000200.1    | - | 106485320 | 106485271 |
| Sma-1-8922 | NW_003020571.1 | + | 1754      | 1803      |
| Sma-1-8923 | NS_000200.1    | + | 360237654 | 360237703 |
| Sma-1-8924 | NW_003037992.1 | + | 231997    | 232046    |
| Sma-1-8925 | NW_003038247.1 | - | 102588    | 102539    |
| Sma-1-8926 | NS_000200.1    | + | 218073478 | 218073527 |
| Sma-1-8927 | NS_000200.1    | - | 316051316 | 316051267 |
| Sma-1-8928 | NW_003026609.1 | + | 169018    | 169067    |
| Sma-1-8929 | NS_000200.1    | + | 309824010 | 309824059 |
| Sma-1-8930 | NW_003037933.1 | + | 259719    | 259768    |
| Sma-1-8931 | NS_000200.1    | + | 178672891 | 178672940 |
| Sma-1-8932 | NW_003037793.1 | - | 3383885   | 3383836   |
| Sma-1-8933 | NW_003037883.1 | - | 190609    | 190560    |
| Sma-1-8934 | NW_003037887.1 | + | 538626    | 538675    |
| Sma-1-8935 | NW_003038037.1 | - | 61202     | 61153     |
| Sma-1-8936 | NS_000200.1    | + | 131002604 | 131002653 |
| Sma-1-8937 | NS_000200.1    | - | 250216611 | 250216562 |
| Sma-1-8938 | NS_000200.1    | - | 126254332 | 126254283 |
| Sma-1-8939 | NS_000200.1    | - | 3383885   | 3383836   |
| Sma-1-8940 | NW_003037793.1 | - | 2555701   | 2555652   |
| Sma-1-8941 | NS_000200.1    | - | 2555701   | 2555652   |
| Sma-1-8942 | NW_003037793.1 | - | 1228438   | 1228389   |
| Sma-1-8943 | NW_003037808.1 | - | 763421    | 763372    |
| Sma-1-8944 | NW_003037914.1 | + | 109340    | 109389    |
| Sma-1-8945 | NS_000200.1    | + | 160253590 | 160253639 |
| Sma-1-8946 | NS_000200.1    | - | 32550058  | 32550009  |
| Sma-1-8947 | NS_000200.1    | - | 1228438   | 1228389   |
| Sma-1-8948 | NW_003038001.1 | - | 55888     | 55839     |

|            |                |   |           |           |
|------------|----------------|---|-----------|-----------|
| Sma-1-8949 | NS_000200.1    | - | 222765449 | 222765400 |
| Sma-1-8950 | NW_003026512.1 | - | 262596    | 262547    |
| Sma-1-8951 | NS_000200.1    | - | 285356636 | 285356587 |
| Sma-1-8952 | NW_003026458.1 | + | 354548    | 354597    |
| Sma-1-8953 | NW_003038080.1 | - | 9317      | 9268      |
| Sma-1-8954 | NS_000200.1    | + | 102222778 | 102222827 |
| Sma-1-8955 | NS_000200.1    | - | 268461927 | 268461878 |
| Sma-1-8956 | NW_003027990.1 | - | 383       | 334       |
| Sma-1-8957 | NW_003030773.1 | - | 1071      | 1022      |
| Sma-1-8958 | NW_003026464.1 | - | 352157    | 352108    |
| Sma-1-8959 | NW_003037793.1 | + | 1953950   | 1953999   |
| Sma-1-8960 | NW_003037796.1 | - | 202000    | 201951    |
| Sma-1-8961 | NW_003037810.1 | + | 969132    | 969181    |
| Sma-1-8962 | NW_003037824.1 | + | 29319     | 29368     |
| Sma-1-8963 | NW_003037830.1 | - | 244770    | 244721    |
| Sma-1-8964 | NW_003037832.1 | + | 563360    | 563409    |
| Sma-1-8965 | NW_003037863.1 | + | 399859    | 399908    |
| Sma-1-8966 | NW_003037880.1 | - | 118456    | 118407    |
| Sma-1-8967 | NW_003037900.1 | - | 315927    | 315878    |
| Sma-1-8968 | NW_003037905.1 | - | 430361    | 430312    |
| Sma-1-8969 | NW_003037918.1 | + | 2124131   | 2124180   |
| Sma-1-8970 | NW_003037925.1 | - | 532371    | 532322    |
| Sma-1-8971 | NW_003038024.1 | + | 692615    | 692664    |
| Sma-1-8972 | NW_003038029.1 | - | 311078    | 311029    |
| Sma-1-8973 | NW_003038042.1 | + | 24907     | 24956     |
| Sma-1-8974 | NW_003038156.1 | - | 506099    | 506050    |
| Sma-1-8975 | NS_000200.1    | + | 1953950   | 1953999   |
| Sma-1-8976 | NS_000200.1    | + | 37573654  | 37573703  |
| Sma-1-8977 | NS_000200.1    | + | 56960259  | 56960308  |
| Sma-1-8978 | NS_000200.1    | + | 71772791  | 71772840  |
| Sma-1-8979 | NS_000200.1    | + | 107158226 | 107158275 |
| Sma-1-8980 | NS_000200.1    | + | 168691121 | 168691170 |
| Sma-1-8981 | NS_000200.1    | + | 238589644 | 238589693 |
| Sma-1-8982 | NS_000200.1    | + | 253970506 | 253970555 |
| Sma-1-8983 | NS_000200.1    | - | 369125501 | 369125452 |
| Sma-1-8984 | NS_000200.1    | - | 366886017 | 366885968 |
| Sma-1-8985 | NS_000200.1    | - | 295238212 | 295238163 |
| Sma-1-8986 | NS_000200.1    | - | 242511979 | 242511930 |
| Sma-1-8987 | NS_000200.1    | - | 203652466 | 203652417 |
| Sma-1-8988 | NS_000200.1    | - | 172934374 | 172934325 |
| Sma-1-8989 | NS_000200.1    | - | 149699373 | 149699324 |
| Sma-1-8990 | NS_000200.1    | - | 145444793 | 145444744 |
| Sma-1-8991 | NS_000200.1    | - | 123802014 | 123801965 |
| Sma-1-8992 | NS_000200.1    | - | 68135141  | 68135092  |
| Sma-1-8993 | NS_000200.1    | - | 8411644   | 8411595   |
| Sma-1-8994 | NW_003038237.1 | + | 118190    | 118239    |
| Sma-1-8995 | NS_000200.1    | + | 313558109 | 313558158 |
| Sma-1-8996 | NW_003026458.1 | + | 510445    | 510494    |
| Sma-1-8997 | NW_003026458.1 | - | 510808    | 510759    |
| Sma-1-8998 | NS_000200.1    | + | 102378675 | 102378724 |
| Sma-1-8999 | NS_000200.1    | - | 102379038 | 102378989 |
| Sma-1-9000 | NW_003037918.1 | - | 463540    | 463491    |

|            |                |   |           |           |
|------------|----------------|---|-----------|-----------|
| Sma-1-9001 | NS_000200.1    | - | 167030530 | 167030481 |
| Sma-1-9002 | NW_003037920.1 | - | 30329     | 30280     |
| Sma-1-9003 | NS_000200.1    | - | 169211136 | 169211087 |
| Sma-1-9004 | NW_003037921.1 | + | 22150     | 22199     |
| Sma-1-9005 | NS_000200.1    | + | 169552285 | 169552334 |
| Sma-1-9006 | NW_003038512.1 | + | 333870    | 333919    |
| Sma-1-9007 | NS_000200.1    | + | 338890567 | 338890616 |
| Sma-1-9008 | NW_003037923.1 | - | 374000    | 373951    |
| Sma-1-9009 | NW_003026484.1 | + | 61848     | 61897     |
| Sma-1-9010 | NS_000200.1    | + | 257024539 | 257024588 |
| Sma-1-9011 | NS_000200.1    | - | 171430213 | 171430164 |
| Sma-1-9012 | NW_003037800.1 | + | 1406862   | 1406911   |
| Sma-1-9013 | NS_000200.1    | + | 20036222  | 20036271  |
| Sma-1-9014 | NW_003037927.1 | + | 106173    | 106222    |
| Sma-1-9015 | NS_000200.1    | + | 174083536 | 174083585 |
| Sma-1-9016 | NW_003037797.1 | - | 3714122   | 3714073   |
| Sma-1-9017 | NW_003038177.1 | - | 52524     | 52475     |
| Sma-1-9018 | NS_000200.1    | - | 300944964 | 300944915 |
| Sma-1-9019 | NS_000200.1    | - | 14141982  | 14141933  |
| Sma-1-9020 | NW_003037797.1 | + | 2700053   | 2700102   |
| Sma-1-9021 | NS_000200.1    | + | 13127913  | 13127962  |
| Sma-1-9022 | NW_003037796.1 | - | 157577    | 157528    |
| Sma-1-9023 | NS_000200.1    | - | 8367221   | 8367172   |
| Sma-1-9024 | NW_003037839.1 | - | 1560112   | 1560063   |
| Sma-1-9025 | NW_003037878.1 | + | 196741    | 196790    |
| Sma-1-9026 | NW_003037938.1 | - | 657966    | 657917    |
| Sma-1-9027 | NW_003026482.1 | - | 55777     | 55728     |
| Sma-1-9028 | NW_003038064.1 | + | 80628     | 80677     |
| Sma-1-9029 | NS_000200.1    | + | 122250219 | 122250268 |
| Sma-1-9030 | NS_000200.1    | + | 261917205 | 261917254 |
| Sma-1-9031 | NS_000200.1    | - | 255843523 | 255843474 |
| Sma-1-9032 | NS_000200.1    | - | 182695079 | 182695030 |
| Sma-1-9033 | NS_000200.1    | - | 80518262  | 80518213  |
| Sma-1-9034 | NW_003037821.1 | - | 177703    | 177654    |
| Sma-1-9035 | NW_003038260.1 | + | 55886     | 55935     |
| Sma-1-9036 | NS_000200.1    | + | 323227661 | 323227710 |
| Sma-1-9037 | NS_000200.1    | - | 53322187  | 53322138  |
| Sma-1-9038 | NW_003037796.1 | - | 895150    | 895101    |
| Sma-1-9039 | NS_000200.1    | - | 9104794   | 9104745   |
| Sma-1-9040 | NW_003037935.1 | + | 897375    | 897424    |
| Sma-1-9041 | NS_000200.1    | + | 180313910 | 180313959 |
| Sma-1-9042 | NW_003035206.1 | - | 836       | 787       |
| Sma-1-9043 | NW_003037808.1 | + | 805478    | 805527    |
| Sma-1-9044 | NW_003037940.1 | + | 191411    | 191460    |
| Sma-1-9045 | NS_000200.1    | + | 32592115  | 32592164  |
| Sma-1-9046 | NS_000200.1    | + | 183933541 | 183933590 |
| Sma-1-9047 | NS_000200.1    | - | 370803424 | 370803375 |
| Sma-1-9048 | NW_003037796.1 | + | 1729821   | 1729870   |
| Sma-1-9049 | NW_003037806.1 | - | 1431944   | 1431895   |
| Sma-1-9050 | NW_003037891.1 | - | 1480476   | 1480427   |
| Sma-1-9051 | NW_003037918.1 | - | 490506    | 490457    |
| Sma-1-9052 | NW_003026517.1 | - | 177312    | 177263    |

|            |                |   |           |           |
|------------|----------------|---|-----------|-----------|
| Sma-1-9053 | NS_000200.1    | + | 9939465   | 9939514   |
| Sma-1-9054 | NS_000200.1    | - | 299783321 | 299783272 |
| Sma-1-9055 | NS_000200.1    | - | 167057496 | 167057447 |
| Sma-1-9056 | NS_000200.1    | - | 139361754 | 139361705 |
| Sma-1-9057 | NS_000200.1    | - | 29627158  | 29627109  |
| Sma-1-9058 | NW_003035559.1 | - | 2127      | 2078      |
| Sma-1-9059 | NW_003037845.1 | - | 601722    | 601673    |
| Sma-1-9060 | NW_003037888.1 | + | 1387117   | 1387166   |
| Sma-1-9061 | NS_000200.1    | + | 133595609 | 133595658 |
| Sma-1-9062 | NS_000200.1    | - | 328427133 | 328427084 |
| Sma-1-9063 | NS_000200.1    | - | 87603625  | 87603576  |
| Sma-1-9064 | NW_003026592.1 | - | 137580    | 137531    |
| Sma-1-9065 | NS_000200.1    | - | 304257238 | 304257189 |
| Sma-1-9066 | NW_003038032.1 | + | 805023    | 805072    |
| Sma-1-9067 | NS_000200.1    | + | 245964183 | 245964232 |
| Sma-1-9068 | NW_003036115.1 | + | 285       | 334       |
| Sma-1-9069 | NW_003037974.1 | - | 722442    | 722393    |
| Sma-1-9070 | NS_000200.1    | + | 347309545 | 347309594 |
| Sma-1-9071 | NS_000200.1    | - | 205397748 | 205397699 |
| Sma-1-9072 | NW_003034600.1 | - | 1095      | 1046      |
| Sma-1-9073 | NS_000200.1    | - | 327828735 | 327828686 |
| Sma-1-9074 | NW_003037951.1 | + | 8537      | 8586      |
| Sma-1-9075 | NW_003037796.1 | - | 1730980   | 1730931   |
| Sma-1-9076 | NW_003037824.1 | - | 103485    | 103436    |
| Sma-1-9077 | NW_003037887.1 | - | 1515022   | 1514973   |
| Sma-1-9078 | NW_003038021.1 | - | 415619    | 415570    |
| Sma-1-9079 | NS_000200.1    | + | 192686262 | 192686311 |
| Sma-1-9080 | NS_000200.1    | - | 235244194 | 235244145 |
| Sma-1-9081 | NS_000200.1    | - | 131979000 | 131978951 |
| Sma-1-9082 | NS_000200.1    | - | 57034425  | 57034376  |
| Sma-1-9083 | NS_000200.1    | - | 9940624   | 9940575   |
| Sma-1-9084 | NW_003037922.1 | + | 254134    | 254183    |
| Sma-1-9085 | NS_000200.1    | + | 170178131 | 170178180 |
| Sma-1-9086 | NW_003037943.1 | - | 473206    | 473158    |
| Sma-1-9087 | NS_000200.1    | - | 187494739 | 187494691 |
| Sma-1-9088 | NW_003032243.1 | + | 1376      | 1425      |
| Sma-1-9089 | NW_003026592.1 | + | 13068     | 13117     |
| Sma-1-9090 | NW_003026619.1 | + | 242190    | 242239    |
| Sma-1-9091 | NS_000200.1    | + | 304132726 | 304132775 |
| Sma-1-9092 | NS_000200.1    | + | 322432934 | 322432983 |
| Sma-1-9093 | NS_000200.1    | + | 357987598 | 357987647 |
| Sma-1-9094 | NW_003031512.1 | - | 1476      | 1427      |
| Sma-1-9095 | NW_003037966.1 | - | 57950     | 57901     |
| Sma-1-9096 | NS_000200.1    | - | 350106788 | 350106739 |
| Sma-1-9097 | NS_000200.1    | - | 198759813 | 198759764 |
| Sma-1-9098 | NW_003028960.1 | + | 1426      | 1475      |
| Sma-1-9099 | NW_003037833.1 | - | 98561     | 98512     |
| Sma-1-9100 | NS_000200.1    | + | 374989613 | 374989662 |
| Sma-1-9101 | NS_000200.1    | - | 72289657  | 72289608  |
| Sma-1-9102 | NW_003038014.1 | - | 248098    | 248049    |
| Sma-1-9103 | NS_000200.1    | - | 229988787 | 229988738 |
| Sma-1-9104 | NW_003037856.1 | - | 626531    | 626482    |

|            |                |   |           |           |
|------------|----------------|---|-----------|-----------|
| Sma-1-9105 | NS.000200.1    | - | 99984487  | 99984438  |
| Sma-1-9106 | NW_003037982.1 | - | 274113    | 274064    |
| Sma-1-9107 | NW_003038083.1 | - | 136231    | 136182    |
| Sma-1-9108 | NS.000200.1    | - | 270379568 | 270379519 |
| Sma-1-9109 | NS.000200.1    | - | 213933308 | 213933259 |
| Sma-1-9110 | NW_003038198.1 | + | 12055     | 12104     |
| Sma-1-9111 | NS.000200.1    | + | 303443015 | 303443064 |
| Sma-1-9112 | NW_003028816.1 | + | 389       | 438       |
| Sma-1-9113 | NW_003037997.1 | + | 161502    | 161551    |
| Sma-1-9114 | NW_003038028.1 | - | 347341    | 347292    |
| Sma-1-9115 | NW_003038261.1 | - | 958224    | 958175    |
| Sma-1-9116 | NW_003038077.1 | - | 129510    | 129461    |
| Sma-1-9117 | NW_003038157.1 | + | 241878    | 241927    |
| Sma-1-9118 | NS.000200.1    | + | 220972944 | 220972993 |
| Sma-1-9119 | NS.000200.1    | + | 295492798 | 295492847 |
| Sma-1-9120 | NS.000200.1    | + | 370000197 | 370000246 |
| Sma-1-9121 | NS.000200.1    | - | 324571875 | 324571826 |
| Sma-1-9122 | NS.000200.1    | - | 266901150 | 266901101 |
| Sma-1-9123 | NS.000200.1    | - | 241654915 | 241654866 |
| Sma-1-9124 | NW_003038043.1 | - | 155117    | 155068    |
| Sma-1-9125 | NW_003038147.1 | + | 292258    | 292307    |
| Sma-1-9126 | NS.000200.1    | + | 289820001 | 289820050 |
| Sma-1-9127 | NS.000200.1    | - | 254465159 | 254465110 |
| Sma-1-9128 | NW_003038025.1 | + | 561958    | 562007    |
| Sma-1-9129 | NS.000200.1    | + | 239420203 | 239420252 |
| Sma-1-9130 | NW_003038027.1 | - | 478644    | 478595    |
| Sma-1-9131 | NS.000200.1    | - | 240849358 | 240849309 |
| Sma-1-9132 | NW_003026468.1 | + | 387133    | 387182    |
| Sma-1-9133 | NW_003037793.1 | + | 764936    | 764985    |
| Sma-1-9134 | NW_003037794.1 | - | 1040344   | 1040295   |
| Sma-1-9135 | NW_003037797.1 | - | 2067419   | 2067370   |
| Sma-1-9136 | NW_003037809.1 | - | 849317    | 849268    |
| Sma-1-9137 | NW_003037813.1 | + | 369200    | 369249    |
| Sma-1-9138 | NW_003037813.1 | - | 368700    | 368651    |
| Sma-1-9139 | NW_003037863.1 | - | 953351    | 953302    |
| Sma-1-9140 | NW_003037886.1 | - | 250126    | 250077    |
| Sma-1-9141 | NW_003037889.1 | + | 645523    | 645572    |
| Sma-1-9142 | NW_003037940.1 | + | 80393     | 80442     |
| Sma-1-9143 | NW_003037944.1 | + | 198301    | 198350    |
| Sma-1-9144 | NW_003037978.1 | + | 171123    | 171172    |
| Sma-1-9145 | NW_003038008.1 | + | 385372    | 385421    |
| Sma-1-9146 | NW_003038014.1 | - | 109688    | 109639    |
| Sma-1-9147 | NW_003038025.1 | + | 564295    | 564344    |
| Sma-1-9148 | NW_003038032.1 | + | 204124    | 204173    |
| Sma-1-9149 | NW_003038034.1 | - | 377293    | 377244    |
| Sma-1-9150 | NW_003026512.1 | + | 205873    | 205922    |
| Sma-1-9151 | NW_003038178.1 | - | 14178     | 14129     |
| Sma-1-9152 | NS.000200.1    | + | 764936    | 764985    |
| Sma-1-9153 | NS.000200.1    | + | 41356063  | 41356112  |
| Sma-1-9154 | NS.000200.1    | + | 134422013 | 134422062 |
| Sma-1-9155 | NS.000200.1    | + | 183822523 | 183822572 |
| Sma-1-9156 | NS.000200.1    | + | 188419654 | 188419703 |

|            |                |   |           |           |
|------------|----------------|---|-----------|-----------|
| Sma-1-9157 | NS_000200.1    | + | 209439133 | 209439182 |
| Sma-1-9158 | NS_000200.1    | + | 216581154 | 216581203 |
| Sma-1-9159 | NS_000200.1    | + | 226058468 | 226058517 |
| Sma-1-9160 | NS_000200.1    | + | 239422540 | 239422589 |
| Sma-1-9161 | NS_000200.1    | + | 245363284 | 245363333 |
| Sma-1-9162 | NS_000200.1    | + | 285299913 | 285299962 |
| Sma-1-9163 | NS_000200.1    | - | 301074923 | 301074874 |
| Sma-1-9164 | NS_000200.1    | - | 247319049 | 247319000 |
| Sma-1-9165 | NS_000200.1    | - | 229850377 | 229850328 |
| Sma-1-9166 | NS_000200.1    | - | 129505693 | 129505644 |
| Sma-1-9167 | NS_000200.1    | - | 107711718 | 107711669 |
| Sma-1-9168 | NS_000200.1    | - | 41355563  | 41355514  |
| Sma-1-9169 | NS_000200.1    | - | 34513781  | 34513732  |
| Sma-1-9170 | NS_000200.1    | - | 12495279  | 12495230  |
| Sma-1-9171 | NS_000200.1    | - | 5219939   | 5219890   |
| Sma-1-9172 | NW_003038131.1 | + | 158058    | 158107    |
| Sma-1-9173 | NS_000200.1    | + | 282119902 | 282119951 |
| Sma-1-9174 | NW_003039130.1 | + | 55922     | 55971     |
| Sma-1-9175 | NS_000200.1    | + | 317730533 | 317730582 |
| Sma-1-9176 | NW_003038243.1 | + | 106957    | 107006    |
| Sma-1-9177 | NW_003038261.1 | + | 309024    | 309073    |
| Sma-1-9178 | NS_000200.1    | + | 315045441 | 315045490 |
| Sma-1-9179 | NS_000200.1    | + | 323922675 | 323922724 |
| Sma-1-9180 | NW_003037793.1 | - | 3730856   | 3730807   |
| Sma-1-9181 | NW_003037839.1 | - | 776013    | 775964    |
| Sma-1-9182 | NW_003026474.1 | + | 67201     | 67250     |
| Sma-1-9183 | NS_000200.1    | + | 253265776 | 253265825 |
| Sma-1-9184 | NS_000200.1    | - | 79734163  | 79734114  |
| Sma-1-9185 | NS_000200.1    | - | 3730856   | 3730807   |
| Sma-1-9186 | NW_003026619.1 | - | 346078    | 346029    |
| Sma-1-9187 | NS_000200.1    | - | 322536822 | 322536773 |
| Sma-1-9188 | NW_003026469.1 | + | 203138    | 203187    |
| Sma-1-9189 | NS_000200.1    | + | 217824797 | 217824846 |
| Sma-1-9190 | NW_003037988.1 | + | 180512    | 180561    |
| Sma-1-9191 | NS_000200.1    | + | 216174330 | 216174379 |
| Sma-1-9192 | NW_003038227.1 | - | 113363    | 113314    |
| Sma-1-9193 | NS_000200.1    | - | 310394717 | 310394668 |
| Sma-1-9194 | NW_003038228.1 | - | 156452    | 156403    |
| Sma-1-9195 | NW_003037800.1 | + | 1603793   | 1603842   |
| Sma-1-9196 | NW_003037946.1 | - | 1020116   | 1020067   |
| Sma-1-9197 | NS_000200.1    | + | 20233153  | 20233202  |
| Sma-1-9198 | NS_000200.1    | - | 311029732 | 311029683 |
| Sma-1-9199 | NS_000200.1    | - | 191713976 | 191713927 |
| Sma-1-9200 | NW_003038022.1 | - | 682758    | 682709    |
| Sma-1-9201 | NS_000200.1    | - | 236363600 | 236363551 |
| Sma-1-9202 | NW_003038024.1 | + | 515150    | 515199    |
| Sma-1-9203 | NS_000200.1    | + | 238412179 | 238412228 |
| Sma-1-9204 | NW_003038024.1 | - | 682477    | 682428    |
| Sma-1-9205 | NS_000200.1    | - | 238579506 | 238579457 |
| Sma-1-9206 | NW_003038073.1 | - | 186234    | 186185    |
| Sma-1-9207 | NS_000200.1    | - | 265708667 | 265708618 |
| Sma-1-9208 | NW_003038119.1 | + | 19037     | 19086     |

|            |                |   |           |           |
|------------|----------------|---|-----------|-----------|
| Sma-1-9209 | NS_000200.1    | + | 277926593 | 277926642 |
| Sma-1-9210 | NW_003038251.1 | - | 66649     | 66600     |
| Sma-1-9211 | NS_000200.1    | - | 318398421 | 318398372 |
| Sma-1-9212 | NW_003038032.1 | + | 142311    | 142360    |
| Sma-1-9213 | NS_000200.1    | + | 245301471 | 245301520 |
| Sma-1-9214 | NW_003038254.1 | - | 340050    | 340001    |
| Sma-1-9215 | NS_000200.1    | - | 320375608 | 320375559 |
| Sma-1-9216 | NW_003038161.1 | - | 393016    | 392967    |
| Sma-1-9217 | NS_000200.1    | - | 297762867 | 297762818 |
| Sma-1-9218 | NW_003037904.1 | - | 416469    | 416420    |
| Sma-1-9219 | NW_003037972.1 | + | 688598    | 688647    |
| Sma-1-9220 | NS_000200.1    | + | 203164302 | 203164351 |
| Sma-1-9221 | NS_000200.1    | - | 149130968 | 149130919 |
| Sma-1-9222 | NW_003037887.1 | - | 1127536   | 1127487   |
| Sma-1-9223 | NW_003038131.1 | + | 443604    | 443653    |
| Sma-1-9224 | NS_000200.1    | + | 282405448 | 282405497 |
| Sma-1-9225 | NS_000200.1    | - | 131591514 | 131591465 |
| Sma-1-9226 | NW_003037874.1 | + | 22864     | 22913     |
| Sma-1-9227 | NS_000200.1    | + | 119447814 | 119447863 |
| Sma-1-9228 | NW_003036385.1 | - | 1531      | 1482      |
| Sma-1-9229 | NS_000200.1    | - | 359785470 | 359785421 |
| Sma-1-9230 | NW_003034097.1 | + | 1002      | 1051      |
| Sma-1-9231 | NS_000200.1    | + | 363734673 | 363734722 |
| Sma-1-9232 | NW_003032014.1 | - | 621       | 572       |
| Sma-1-9233 | NW_003038369.1 | - | 7633      | 7584      |
| Sma-1-9234 | NW_003037867.1 | + | 19017     | 19066     |
| Sma-1-9235 | NW_003037929.1 | + | 19896     | 19945     |
| Sma-1-9236 | NW_003038244.1 | - | 406741    | 406692    |
| Sma-1-9237 | NW_003037798.1 | + | 1925526   | 1925575   |
| Sma-1-9238 | NW_003037798.1 | - | 1684504   | 1684455   |
| Sma-1-9239 | NW_003037813.1 | - | 851395    | 851346    |
| Sma-1-9240 | NW_003037833.1 | + | 511020    | 511069    |
| Sma-1-9241 | NW_003037851.1 | + | 790504    | 790553    |
| Sma-1-9242 | NW_003037860.1 | + | 65157     | 65206     |
| Sma-1-9243 | NW_003037866.1 | + | 1345932   | 1345981   |
| Sma-1-9244 | NW_003037905.1 | - | 644915    | 644866    |
| Sma-1-9245 | NW_003037912.1 | - | 74618     | 74569     |
| Sma-1-9246 | NW_003037917.1 | + | 810779    | 810828    |
| Sma-1-9247 | NW_003037925.1 | - | 191084    | 191035    |
| Sma-1-9248 | NW_003037940.1 | + | 138733    | 138782    |
| Sma-1-9249 | NW_003038012.1 | + | 366937    | 366986    |
| Sma-1-9250 | NW_003038024.1 | + | 874734    | 874783    |
| Sma-1-9251 | NW_003038031.1 | + | 49804     | 49853     |
| Sma-1-9252 | NW_003038037.1 | + | 427831    | 427880    |
| Sma-1-9253 | NW_003038257.1 | - | 300688    | 300639    |
| Sma-1-9254 | NW_003038046.1 | + | 60466     | 60515     |
| Sma-1-9255 | NW_003038114.1 | + | 158721    | 158770    |
| Sma-1-9256 | NW_003038116.1 | + | 45753     | 45802     |
| Sma-1-9257 | NW_003038146.1 | + | 528822    | 528871    |
| Sma-1-9258 | NS_000200.1    | + | 16184684  | 16184733  |
| Sma-1-9259 | NS_000200.1    | + | 72702116  | 72702165  |
| Sma-1-9260 | NS_000200.1    | + | 94193814  | 94193863  |



|            |                |   |           |           |
|------------|----------------|---|-----------|-----------|
| Sma-1-9261 | NS_000200.1    | + | 103808185 | 103808234 |
| Sma-1-9262 | NS_000200.1    | + | 112833731 | 112833780 |
| Sma-1-9263 | NS_000200.1    | + | 115619836 | 115619885 |
| Sma-1-9264 | NS_000200.1    | + | 165847583 | 165847632 |
| Sma-1-9265 | NS_000200.1    | + | 175260674 | 175260723 |
| Sma-1-9266 | NS_000200.1    | + | 183880863 | 183880912 |
| Sma-1-9267 | NS_000200.1    | + | 228690876 | 228690925 |
| Sma-1-9268 | NS_000200.1    | + | 238771763 | 238771812 |
| Sma-1-9269 | NS_000200.1    | + | 244327562 | 244327611 |
| Sma-1-9270 | NS_000200.1    | + | 250583240 | 250583289 |
| Sma-1-9271 | NS_000200.1    | + | 255133848 | 255133897 |
| Sma-1-9272 | NS_000200.1    | + | 276884626 | 276884675 |
| Sma-1-9273 | NS_000200.1    | + | 277261031 | 277261080 |
| Sma-1-9274 | NS_000200.1    | + | 289509492 | 289509541 |
| Sma-1-9275 | NS_000200.1    | - | 353816693 | 353816644 |
| Sma-1-9276 | NS_000200.1    | - | 327116572 | 327116523 |
| Sma-1-9277 | NS_000200.1    | - | 321475016 | 321474967 |
| Sma-1-9278 | NS_000200.1    | - | 315551946 | 315551897 |
| Sma-1-9279 | NS_000200.1    | - | 172593087 | 172593038 |
| Sma-1-9280 | NS_000200.1    | - | 156886193 | 156886144 |
| Sma-1-9281 | NS_000200.1    | - | 149913927 | 149913878 |
| Sma-1-9282 | NS_000200.1    | - | 41838258  | 41838209  |
| Sma-1-9283 | NS_000200.1    | - | 15943662  | 15943613  |
| Sma-1-9284 | NW_003031251.1 | - | 751       | 699       |
| Sma-1-9285 | NS_000200.1    | - | 345610155 | 345610103 |
| Sma-1-9286 | NW_003030221.1 | + | 38        | 87        |
| Sma-1-9287 | NW_003038253.1 | + | 72603     | 72652     |
| Sma-1-9288 | NW_003038253.1 | - | 71583     | 71534     |
| Sma-1-9289 | NW_003037936.1 | + | 626903    | 626952    |
| Sma-1-9290 | NW_003038489.1 | - | 67851     | 67802     |
| Sma-1-9291 | NW_003037792.1 | - | 301044    | 300995    |
| Sma-1-9292 | NW_003037801.1 | + | 503789    | 503838    |
| Sma-1-9293 | NW_003037809.1 | - | 1713905   | 1713856   |
| Sma-1-9294 | NW_003037814.1 | + | 2055050   | 2055099   |
| Sma-1-9295 | NW_003037818.1 | + | 1665024   | 1665073   |
| Sma-1-9296 | NW_003037822.1 | + | 1607932   | 1607981   |
| Sma-1-9297 | NW_003037829.1 | - | 1306347   | 1306298   |
| Sma-1-9298 | NW_003037846.1 | - | 613946    | 613897    |
| Sma-1-9299 | NW_003037853.1 | + | 751340    | 751389    |
| Sma-1-9300 | NW_003037932.1 | + | 396884    | 396933    |
| Sma-1-9301 | NW_003037932.1 | + | 401130    | 401179    |
| Sma-1-9302 | NW_003037938.1 | + | 352370    | 352419    |
| Sma-1-9303 | NW_003037972.1 | - | 489724    | 489675    |
| Sma-1-9304 | NW_003037978.1 | + | 382146    | 382195    |
| Sma-1-9305 | NW_003038011.1 | - | 307563    | 307514    |
| Sma-1-9306 | NW_003038014.1 | + | 183249    | 183298    |
| Sma-1-9307 | NW_003038014.1 | + | 221528    | 221577    |
| Sma-1-9308 | NW_003038210.1 | - | 97426     | 97377     |
| Sma-1-9309 | NW_003038261.1 | + | 575196    | 575245    |
| Sma-1-9310 | NW_003038057.1 | + | 355696    | 355745    |
| Sma-1-9311 | NW_003038160.1 | + | 236802    | 236851    |
| Sma-1-9312 | NS_000200.1    | + | 21593269  | 21593318  |

|            |                |   |           |           |
|------------|----------------|---|-----------|-----------|
| Sma-1-9313 | NS_000200.1    | + | 45038910  | 45038959  |
| Sma-1-9314 | NS_000200.1    | + | 50380431  | 50380480  |
| Sma-1-9315 | NS_000200.1    | + | 55915938  | 55915987  |
| Sma-1-9316 | NS_000200.1    | + | 96243391  | 96243440  |
| Sma-1-9317 | NS_000200.1    | + | 177930080 | 177930129 |
| Sma-1-9318 | NS_000200.1    | + | 177934326 | 177934375 |
| Sma-1-9319 | NS_000200.1    | + | 181066632 | 181066681 |
| Sma-1-9320 | NS_000200.1    | + | 182389483 | 182389532 |
| Sma-1-9321 | NS_000200.1    | + | 209650156 | 209650205 |
| Sma-1-9322 | NS_000200.1    | + | 229923938 | 229923987 |
| Sma-1-9323 | NS_000200.1    | + | 229962217 | 229962266 |
| Sma-1-9324 | NS_000200.1    | + | 259561512 | 259561561 |
| Sma-1-9325 | NS_000200.1    | + | 296988733 | 296988782 |
| Sma-1-9326 | NS_000200.1    | + | 319390400 | 319390449 |
| Sma-1-9327 | NS_000200.1    | + | 324188847 | 324188896 |
| Sma-1-9328 | NS_000200.1    | + | 362374952 | 362375001 |
| Sma-1-9329 | NS_000200.1    | - | 382738388 | 382738339 |
| Sma-1-9330 | NS_000200.1    | - | 333780134 | 333780085 |
| Sma-1-9331 | NS_000200.1    | - | 319389380 | 319389331 |
| Sma-1-9332 | NS_000200.1    | - | 305559325 | 305559276 |
| Sma-1-9333 | NS_000200.1    | - | 227835213 | 227835164 |
| Sma-1-9334 | NS_000200.1    | - | 202965428 | 202965379 |
| Sma-1-9335 | NS_000200.1    | - | 88248516  | 88248467  |
| Sma-1-9336 | NS_000200.1    | - | 67206885  | 67206836  |
| Sma-1-9337 | NS_000200.1    | - | 35378369  | 35378320  |
| Sma-1-9338 | NW_003027916.1 | - | 1721      | 1672      |
| Sma-1-9339 | NW_003026601.1 | + | 14915     | 14964     |
| Sma-1-9340 | NW_003037367.1 | + | 439       | 488       |
| Sma-1-9341 | NW_003038226.1 | + | 30984     | 31033     |
| Sma-1-9342 | NW_003038235.1 | - | 96395     | 96346     |
| Sma-1-9343 | NW_003037927.1 | + | 73635     | 73684     |
| Sma-1-9344 | NW_003026468.1 | + | 231088    | 231137    |
| Sma-1-9345 | NW_003037937.1 | - | 97785     | 97736     |
| Sma-1-9346 | NW_003037794.1 | + | 1888879   | 1888928   |
| Sma-1-9347 | NW_003037794.1 | - | 1886618   | 1886569   |
| Sma-1-9348 | NW_003037794.1 | - | 1261303   | 1261254   |
| Sma-1-9349 | NW_003037805.1 | - | 1559920   | 1559871   |
| Sma-1-9350 | NW_003037807.1 | + | 885864    | 885913    |
| Sma-1-9351 | NW_003037809.1 | + | 2080094   | 2080143   |
| Sma-1-9352 | NW_003037809.1 | - | 2080675   | 2080626   |
| Sma-1-9353 | NW_003037822.1 | + | 1109711   | 1109760   |
| Sma-1-9354 | NW_003037850.1 | + | 635929    | 635978    |
| Sma-1-9355 | NW_003037854.1 | + | 699493    | 699542    |
| Sma-1-9356 | NW_003037856.1 | + | 544418    | 544467    |
| Sma-1-9357 | NW_003037863.1 | + | 1509582   | 1509631   |
| Sma-1-9358 | NW_003037864.1 | - | 1143466   | 1143417   |
| Sma-1-9359 | NW_003037885.1 | + | 892349    | 892398    |
| Sma-1-9360 | NW_003037908.1 | - | 287660    | 287611    |
| Sma-1-9361 | NW_003037911.1 | - | 290629    | 290580    |
| Sma-1-9362 | NW_003037928.1 | + | 57707     | 57756     |
| Sma-1-9363 | NW_003037928.1 | - | 6507      | 6458      |
| Sma-1-9364 | NW_003037953.1 | - | 10356     | 10307     |

|            |                |   |           |           |
|------------|----------------|---|-----------|-----------|
| Sma-1-9365 | NW_003037971.1 | - | 283488    | 283439    |
| Sma-1-9366 | NW_003037977.1 | - | 596825    | 596776    |
| Sma-1-9367 | NW_003037980.1 | - | 675969    | 675920    |
| Sma-1-9368 | NW_003038023.1 | + | 485109    | 485158    |
| Sma-1-9369 | NW_003038037.1 | + | 552368    | 552417    |
| Sma-1-9370 | NW_003038229.1 | + | 11681     | 11730     |
| Sma-1-9371 | NW_003038229.1 | - | 10123     | 10074     |
| Sma-1-9372 | NW_003038507.1 | + | 8441      | 8490      |
| Sma-1-9373 | NW_003026516.1 | + | 474600    | 474649    |
| Sma-1-9374 | NW_003038128.1 | - | 296298    | 296249    |
| Sma-1-9375 | NW_003038161.1 | + | 123088    | 123137    |
| Sma-1-9376 | NS_000200.1    | + | 6068474   | 6068523   |
| Sma-1-9377 | NS_000200.1    | + | 31147380  | 31147429  |
| Sma-1-9378 | NS_000200.1    | + | 35744558  | 35744607  |
| Sma-1-9379 | NS_000200.1    | + | 55417717  | 55417766  |
| Sma-1-9380 | NS_000200.1    | + | 92621959  | 92622008  |
| Sma-1-9381 | NS_000200.1    | + | 97603914  | 97603963  |
| Sma-1-9382 | NS_000200.1    | + | 99902374  | 99902423  |
| Sma-1-9383 | NS_000200.1    | + | 108267949 | 108267998 |
| Sma-1-9384 | NS_000200.1    | + | 128990296 | 128990345 |
| Sma-1-9385 | NS_000200.1    | + | 174050998 | 174051047 |
| Sma-1-9386 | NS_000200.1    | + | 174381660 | 174381709 |
| Sma-1-9387 | NS_000200.1    | + | 216425109 | 216425158 |
| Sma-1-9388 | NS_000200.1    | + | 237645400 | 237645449 |
| Sma-1-9389 | NS_000200.1    | + | 250707777 | 250707826 |
| Sma-1-9390 | NS_000200.1    | + | 297492939 | 297492988 |
| Sma-1-9391 | NS_000200.1    | + | 299582897 | 299582946 |
| Sma-1-9392 | NS_000200.1    | + | 306396524 | 306396573 |
| Sma-1-9393 | NS_000200.1    | + | 310062018 | 310062067 |
| Sma-1-9394 | NS_000200.1    | + | 311128903 | 311128952 |
| Sma-1-9395 | NS_000200.1    | + | 336677335 | 336677384 |
| Sma-1-9396 | NS_000200.1    | + | 367086188 | 367086237 |
| Sma-1-9397 | NS_000200.1    | - | 366149614 | 366149565 |
| Sma-1-9398 | NS_000200.1    | - | 313161986 | 313161937 |
| Sma-1-9399 | NS_000200.1    | - | 311127345 | 311127296 |
| Sma-1-9400 | NS_000200.1    | - | 281014586 | 281014537 |
| Sma-1-9401 | NS_000200.1    | - | 211636831 | 211636782 |
| Sma-1-9402 | NS_000200.1    | - | 208882845 | 208882796 |
| Sma-1-9403 | NS_000200.1    | - | 201905538 | 201905489 |
| Sma-1-9404 | NS_000200.1    | - | 192923407 | 192923358 |
| Sma-1-9405 | NS_000200.1    | - | 181297694 | 181297645 |
| Sma-1-9406 | NS_000200.1    | - | 174330460 | 174330411 |
| Sma-1-9407 | NS_000200.1    | - | 156077982 | 156077933 |
| Sma-1-9408 | NS_000200.1    | - | 152760791 | 152760742 |
| Sma-1-9409 | NS_000200.1    | - | 109636040 | 109635991 |
| Sma-1-9410 | NS_000200.1    | - | 35745139  | 35745090  |
| Sma-1-9411 | NS_000200.1    | - | 28117764  | 28117715  |
| Sma-1-9412 | NS_000200.1    | - | 6066213   | 6066164   |
| Sma-1-9413 | NS_000200.1    | - | 5440898   | 5440849   |
| Sma-1-9414 | NW_003026624.1 | + | 21462     | 21511     |
| Sma-1-9415 | NS_000200.1    | + | 324891632 | 324891681 |
| Sma-1-9416 | NW_003026472.1 | - | 126728    | 126679    |

|            |                |   |           |           |
|------------|----------------|---|-----------|-----------|
| Sma-1-9417 | NS.000200.1    | - | 236538720 | 236538671 |
| Sma-1-9418 | NW_003026471.1 | + | 177497    | 177546    |
| Sma-1-9419 | NW_003037976.1 | - | 5915      | 5866      |
| Sma-1-9420 | NW_003038037.1 | - | 1282022   | 1281973   |
| Sma-1-9421 | NW_003039127.1 | - | 2512342   | 2512293   |
| Sma-1-9422 | NS.000200.1    | + | 222289730 | 222289779 |
| Sma-1-9423 | NS.000200.1    | - | 251437431 | 251437382 |
| Sma-1-9424 | NS.000200.1    | - | 206620230 | 206620181 |
| Sma-1-9425 | NS.000200.1    | - | 115589841 | 115589792 |
| Sma-1-9426 | NW_003025519.1 | - | 729       | 680       |
| Sma-1-9427 | NW_003032158.1 | - | 20334     | 20285     |
| Sma-1-9428 | NW_003038514.1 | - | 290746    | 290697    |
| Sma-1-9429 | NW_003038516.1 | + | 15007     | 15056     |
| Sma-1-9430 | NW_003038420.1 | + | 2934      | 2983      |
| Sma-1-9431 | NW_003026472.1 | - | 399439    | 399390    |
| Sma-1-9432 | NW_003026618.1 | + | 161825    | 161874    |
| Sma-1-9433 | NW_003026458.1 | - | 101810    | 101761    |
| Sma-1-9434 | NW_003037800.1 | + | 1879691   | 1879740   |
| Sma-1-9435 | NW_003037800.1 | - | 1556487   | 1556438   |
| Sma-1-9436 | NW_003037819.1 | - | 791759    | 791710    |
| Sma-1-9437 | NW_003037844.1 | + | 567106    | 567155    |
| Sma-1-9438 | NW_003037853.1 | - | 452293    | 452244    |
| Sma-1-9439 | NW_003037910.1 | - | 957759    | 957710    |
| Sma-1-9440 | NW_003037912.1 | - | 525480    | 525431    |
| Sma-1-9441 | NW_003037944.1 | + | 184262    | 184311    |
| Sma-1-9442 | NW_003037977.1 | + | 200836    | 200885    |
| Sma-1-9443 | NW_003038027.1 | + | 404105    | 404154    |
| Sma-1-9444 | NW_003038027.1 | - | 359897    | 359848    |
| Sma-1-9445 | NW_003038072.1 | - | 108599    | 108550    |
| Sma-1-9446 | NW_003038072.1 | - | 55074     | 55025     |
| Sma-1-9447 | NW_003039127.1 | + | 710804    | 710853    |
| Sma-1-9448 | NS.000200.1    | + | 20509051  | 20509100  |
| Sma-1-9449 | NS.000200.1    | + | 86750552  | 86750601  |
| Sma-1-9450 | NS.000200.1    | + | 113788303 | 113788352 |
| Sma-1-9451 | NS.000200.1    | + | 188405615 | 188405664 |
| Sma-1-9452 | NS.000200.1    | + | 208486856 | 208486905 |
| Sma-1-9453 | NS.000200.1    | + | 240774819 | 240774868 |
| Sma-1-9454 | NS.000200.1    | + | 321916827 | 321916876 |
| Sma-1-9455 | NS.000200.1    | + | 328924965 | 328925014 |
| Sma-1-9456 | NS.000200.1    | + | 340503412 | 340503461 |
| Sma-1-9457 | NS.000200.1    | - | 380752613 | 380752564 |
| Sma-1-9458 | NS.000200.1    | - | 356086267 | 356086218 |
| Sma-1-9459 | NS.000200.1    | - | 339915285 | 339915236 |
| Sma-1-9460 | NS.000200.1    | - | 265270827 | 265270778 |
| Sma-1-9461 | NS.000200.1    | - | 265217302 | 265217253 |
| Sma-1-9462 | NS.000200.1    | - | 240730611 | 240730562 |
| Sma-1-9463 | NS.000200.1    | - | 236811431 | 236811382 |
| Sma-1-9464 | NS.000200.1    | - | 157337055 | 157337006 |
| Sma-1-9465 | NS.000200.1    | - | 155469734 | 155469685 |
| Sma-1-9466 | NS.000200.1    | - | 101970040 | 101969991 |
| Sma-1-9467 | NS.000200.1    | - | 95944344  | 95944295  |
| Sma-1-9468 | NS.000200.1    | - | 51880024  | 51879975  |

|            |                |   |           |           |
|------------|----------------|---|-----------|-----------|
| Sma-1-9469 | NS.000200.1    | - | 20185847  | 20185798  |
| Sma-1-9470 | NW_003025336.1 | - | 978       | 929       |
| Sma-1-9471 | NW_003025336.1 | - | 575       | 526       |
| Sma-1-9472 | NW_003025336.1 | - | 174       | 125       |
| Sma-1-9473 | NW_003029208.1 | + | 211       | 260       |
| Sma-1-9474 | NW_003030317.1 | - | 782       | 733       |
| Sma-1-9475 | NW_003030317.1 | - | 379       | 330       |
| Sma-1-9476 | NW_003030824.1 | + | 1280      | 1329      |
| Sma-1-9477 | NW_003036643.1 | - | 1243      | 1194      |
| Sma-1-9478 | NW_003036643.1 | - | 840       | 791       |
| Sma-1-9479 | NW_003036643.1 | - | 437       | 388       |
| Sma-1-9480 | NW_003039029.1 | + | 4071      | 4120      |
| Sma-1-9481 | NW_003038211.1 | + | 143022    | 143071    |
| Sma-1-9482 | NW_003037810.1 | + | 45783     | 45832     |
| Sma-1-9483 | NW_003037847.1 | + | 117492    | 117541    |
| Sma-1-9484 | NW_003037892.1 | + | 207102    | 207151    |
| Sma-1-9485 | NW_003037953.1 | + | 218691    | 218740    |
| Sma-1-9486 | NW_003037972.1 | - | 325643    | 325594    |
| Sma-1-9487 | NW_003037980.1 | - | 1245453   | 1245404   |
| Sma-1-9488 | NW_003038038.1 | + | 51859     | 51908     |
| Sma-1-9489 | NW_003026488.1 | - | 221636    | 221587    |
| Sma-1-9490 | NW_003026517.1 | - | 681293    | 681244    |
| Sma-1-9491 | NW_003026517.1 | - | 679901    | 679852    |
| Sma-1-9492 | NW_003038150.1 | - | 411436    | 411387    |
| Sma-1-9493 | NS.000200.1    | + | 36650305  | 36650354  |
| Sma-1-9494 | NS.000200.1    | + | 88769222  | 88769271  |
| Sma-1-9495 | NS.000200.1    | + | 140930329 | 140930378 |
| Sma-1-9496 | NS.000200.1    | + | 193131742 | 193131791 |
| Sma-1-9497 | NS.000200.1    | + | 251955252 | 251955301 |
| Sma-1-9498 | NS.000200.1    | + | 306163092 | 306163141 |
| Sma-1-9499 | NS.000200.1    | + | 357084776 | 357084825 |
| Sma-1-9500 | NS.000200.1    | + | 358819950 | 358819999 |
| Sma-1-9501 | NS.000200.1    | + | 370320079 | 370320128 |
| Sma-1-9502 | NS.000200.1    | - | 362663724 | 362663675 |
| Sma-1-9503 | NS.000200.1    | - | 362663321 | 362663272 |
| Sma-1-9504 | NS.000200.1    | - | 352533862 | 352533813 |
| Sma-1-9505 | NS.000200.1    | - | 352533459 | 352533410 |
| Sma-1-9506 | NS.000200.1    | - | 352533058 | 352533009 |
| Sma-1-9507 | NS.000200.1    | - | 351460847 | 351460798 |
| Sma-1-9508 | NS.000200.1    | - | 351460444 | 351460395 |
| Sma-1-9509 | NS.000200.1    | - | 351460041 | 351459992 |
| Sma-1-9510 | NS.000200.1    | - | 300287302 | 300287253 |
| Sma-1-9511 | NS.000200.1    | - | 300285910 | 300285861 |
| Sma-1-9512 | NS.000200.1    | - | 291890174 | 291890125 |
| Sma-1-9513 | NS.000200.1    | - | 263728130 | 263728081 |
| Sma-1-9514 | NS.000200.1    | - | 212206315 | 212206266 |
| Sma-1-9515 | NS.000200.1    | - | 202801347 | 202801298 |
| Sma-1-9516 | NW_003021533.1 | - | 502       | 453       |
| Sma-1-9517 | NW_003026873.1 | + | 701       | 750       |
| Sma-1-9518 | NW_003037888.1 | + | 224850    | 224899    |
| Sma-1-9519 | NW_003037905.1 | - | 460061    | 460012    |
| Sma-1-9520 | NW_003038023.1 | - | 730049    | 730000    |

|            |                |   |           |           |
|------------|----------------|---|-----------|-----------|
| Sma-1-9521 | NS_000200.1    | + | 132433342 | 132433391 |
| Sma-1-9522 | NS_000200.1    | + | 345360203 | 345360252 |
| Sma-1-9523 | NS_000200.1    | - | 348033658 | 348033609 |
| Sma-1-9524 | NS_000200.1    | - | 237890340 | 237890291 |
| Sma-1-9525 | NS_000200.1    | - | 149729073 | 149729024 |
| Sma-1-9526 | NW_003020183.1 | + | 315       | 364       |
| Sma-1-9527 | NW_003020246.1 | + | 57        | 106       |
| Sma-1-9528 | NW_003020616.1 | - | 1624      | 1575      |
| Sma-1-9529 | NW_003021276.1 | + | 90        | 139       |
| Sma-1-9530 | NW_003021839.1 | - | 673       | 624       |
| Sma-1-9531 | NW_003021839.1 | - | 275       | 226       |
| Sma-1-9532 | NW_003022032.1 | + | 3462      | 3511      |
| Sma-1-9533 | NW_003022422.1 | - | 1115      | 1066      |
| Sma-1-9534 | NW_003022520.1 | - | 2104      | 2055      |
| Sma-1-9535 | NW_003022558.1 | - | 1396      | 1347      |
| Sma-1-9536 | NW_003023481.1 | - | 367       | 318       |
| Sma-1-9537 | NW_003024376.1 | + | 854       | 903       |
| Sma-1-9538 | NW_003024631.1 | + | 55        | 104       |
| Sma-1-9539 | NW_003024827.1 | - | 924       | 875       |
| Sma-1-9540 | NW_003024827.1 | - | 526       | 477       |
| Sma-1-9541 | NW_003024827.1 | - | 128       | 79        |
| Sma-1-9542 | NW_003025543.1 | - | 536       | 487       |
| Sma-1-9543 | NW_003025543.1 | - | 134       | 85        |
| Sma-1-9544 | NW_003025661.1 | - | 971       | 922       |
| Sma-1-9545 | NW_003026297.1 | - | 133       | 84        |
| Sma-1-9546 | NW_003026353.1 | + | 382       | 431       |
| Sma-1-9547 | NW_003026461.1 | - | 51875     | 51826     |
| Sma-1-9548 | NW_003026567.1 | + | 14673     | 14722     |
| Sma-1-9549 | NW_003026728.1 | + | 56        | 105       |
| Sma-1-9550 | NW_003026732.1 | - | 439       | 390       |
| Sma-1-9551 | NW_003027394.1 | - | 691       | 642       |
| Sma-1-9552 | NW_003029270.1 | + | 233       | 282       |
| Sma-1-9553 | NW_003029818.1 | + | 2933      | 2982      |
| Sma-1-9554 | NW_003030106.1 | - | 649       | 600       |
| Sma-1-9555 | NW_003031024.1 | + | 1173      | 1222      |
| Sma-1-9556 | NW_003031945.1 | + | 276       | 325       |
| Sma-1-9557 | NW_003032158.1 | - | 29640     | 29591     |
| Sma-1-9558 | NW_003032444.1 | - | 688       | 639       |
| Sma-1-9559 | NW_003032444.1 | - | 287       | 238       |
| Sma-1-9560 | NW_003032991.1 | + | 47        | 96        |
| Sma-1-9561 | NW_003033041.1 | - | 265       | 216       |
| Sma-1-9562 | NW_003033917.1 | + | 287       | 336       |
| Sma-1-9563 | NW_003034071.1 | - | 937       | 888       |
| Sma-1-9564 | NW_003034601.1 | - | 2594      | 2545      |
| Sma-1-9565 | NW_003034607.1 | - | 4265      | 4216      |
| Sma-1-9566 | NW_003035148.1 | - | 1719      | 1670      |
| Sma-1-9567 | NW_003035192.1 | + | 1024      | 1073      |
| Sma-1-9568 | NW_003035209.1 | - | 1017      | 968       |
| Sma-1-9569 | NW_003035219.1 | - | 781       | 732       |
| Sma-1-9570 | NW_003035219.1 | - | 375       | 326       |
| Sma-1-9571 | NW_003035403.1 | + | 638       | 687       |
| Sma-1-9572 | NW_003035417.1 | + | 707       | 756       |

|            |                |   |        |        |
|------------|----------------|---|--------|--------|
| Sma-1-9573 | NW_003035623.1 | - | 901    | 852    |
| Sma-1-9574 | NW_003035641.1 | + | 5648   | 5697   |
| Sma-1-9575 | NW_003035693.1 | + | 123    | 172    |
| Sma-1-9576 | NW_003035707.1 | - | 2746   | 2697   |
| Sma-1-9577 | NW_003036064.1 | - | 87     | 38     |
| Sma-1-9578 | NW_003036176.1 | + | 2437   | 2486   |
| Sma-1-9579 | NW_003036786.1 | - | 1324   | 1275   |
| Sma-1-9580 | NW_003026617.1 | + | 48677  | 48726  |
| Sma-1-9581 | NW_003035872.1 | + | 108444 | 108493 |
| Sma-1-9582 | NW_003038253.1 | + | 62592  | 62641  |
| Sma-1-9583 | NW_003038262.1 | - | 42005  | 41956  |
| Sma-1-9584 | NW_003038504.1 | + | 31055  | 31104  |
| Sma-1-9585 | NW_003038264.1 | + | 17959  | 18008  |
| Sma-1-9586 | NW_003037875.1 | + | 508931 | 508980 |
| Sma-1-9587 | NW_003037875.1 | - | 166910 | 166861 |
| Sma-1-9588 | NW_003037876.1 | - | 115514 | 115465 |
| Sma-1-9589 | NW_003037960.1 | + | 4305   | 4354   |
| Sma-1-9590 | NW_003038511.1 | - | 18786  | 18737  |
| Sma-1-9591 | NW_003026596.1 | - | 152213 | 152164 |
| Sma-1-9592 | NW_003035636.1 | + | 49069  | 49118  |
| Sma-1-9593 | NW_003035880.1 | - | 25251  | 25202  |
| Sma-1-9594 | NW_003037965.1 | - | 142368 | 142319 |
| Sma-1-9595 | NW_003039028.1 | - | 1539   | 1490   |
| Sma-1-9596 | NW_003035639.1 | + | 51948  | 51997  |
| Sma-1-9597 | NW_003038276.1 | + | 3941   | 3990   |
| Sma-1-9598 | NW_003026472.1 | + | 129280 | 129329 |
| Sma-1-9599 | NW_003026472.1 | + | 320834 | 320883 |
| Sma-1-9600 | NW_003026472.1 | - | 241686 | 241637 |
| Sma-1-9601 | NW_003026472.1 | - | 152537 | 152488 |
| Sma-1-9602 | NW_003037898.1 | - | 387972 | 387923 |
| Sma-1-9603 | NW_003038457.1 | - | 27369  | 27320  |
| Sma-1-9604 | NW_003026471.1 | - | 226861 | 226812 |
| Sma-1-9605 | NW_003038377.1 | - | 4565   | 4516   |
| Sma-1-9606 | NW_003037771.1 | + | 43067  | 43116  |
| Sma-1-9607 | NW_003026611.1 | - | 103801 | 103752 |
| Sma-1-9608 | NW_003037774.1 | + | 26093  | 26142  |
| Sma-1-9609 | NW_003037774.1 | - | 22744  | 22695  |
| Sma-1-9610 | NW_003037920.1 | + | 192115 | 192164 |
| Sma-1-9611 | NW_003037920.1 | - | 191871 | 191822 |
| Sma-1-9612 | NW_003037217.1 | + | 1628   | 1677   |
| Sma-1-9613 | NW_003038005.1 | + | 394581 | 394630 |
| Sma-1-9614 | NW_003038231.1 | + | 2844   | 2893   |
| Sma-1-9615 | NW_003026618.1 | + | 178630 | 178679 |
| Sma-1-9616 | NW_003026618.1 | + | 223777 | 223826 |
| Sma-1-9617 | NW_003026612.1 | - | 207079 | 207030 |
| Sma-1-9618 | NW_003038009.1 | + | 68213  | 68262  |
| Sma-1-9619 | NW_003038235.1 | + | 89820  | 89869  |
| Sma-1-9620 | NW_003037466.1 | - | 1430   | 1381   |
| Sma-1-9621 | NW_003038917.1 | + | 849    | 898    |
| Sma-1-9622 | NW_003038917.1 | + | 1902   | 1951   |
| Sma-1-9623 | NW_003037259.1 | + | 100    | 149    |
| Sma-1-9624 | NW_003038473.1 | + | 34328  | 34377  |

|            |                |   |         |         |
|------------|----------------|---|---------|---------|
| Sma-1-9625 | NW_003038473.1 | - | 33897   | 33848   |
| Sma-1-9626 | NW_003038473.1 | - | 32055   | 32006   |
| Sma-1-9627 | NW_003026465.1 | + | 327099  | 327148  |
| Sma-1-9628 | NW_003026465.1 | + | 335196  | 335245  |
| Sma-1-9629 | NW_003026465.1 | - | 334795  | 334746  |
| Sma-1-9630 | NW_003037790.1 | + | 317139  | 317188  |
| Sma-1-9631 | NW_003035870.1 | - | 46982   | 46933   |
| Sma-1-9632 | NW_003038258.1 | + | 1441    | 1490    |
| Sma-1-9633 | NW_003037929.1 | + | 287456  | 287505  |
| Sma-1-9634 | NW_003037929.1 | - | 75153   | 75104   |
| Sma-1-9635 | NW_003037934.1 | - | 96376   | 96327   |
| Sma-1-9636 | NW_003037934.1 | - | 75851   | 75802   |
| Sma-1-9637 | NW_003038244.1 | - | 333262  | 333213  |
| Sma-1-9638 | NW_003038244.1 | - | 176888  | 176839  |
| Sma-1-9639 | NW_003026469.1 | + | 23964   | 24013   |
| Sma-1-9640 | NW_003026469.1 | - | 23555   | 23506   |
| Sma-1-9641 | NW_003037936.1 | - | 239697  | 239648  |
| Sma-1-9642 | NW_003037937.1 | + | 307888  | 307937  |
| Sma-1-9643 | NW_003037995.1 | - | 390568  | 390519  |
| Sma-1-9644 | NW_003037995.1 | - | 269957  | 269908  |
| Sma-1-9645 | NW_003037995.1 | - | 48437   | 48388   |
| Sma-1-9646 | NW_003038698.1 | + | 101     | 150     |
| Sma-1-9647 | NW_003035866.1 | - | 51328   | 51279   |
| Sma-1-9648 | NW_003038070.1 | - | 281939  | 281890  |
| Sma-1-9649 | NW_003038250.1 | - | 95201   | 95152   |
| Sma-1-9650 | NW_003026462.1 | + | 495706  | 495755  |
| Sma-1-9651 | NW_003026464.1 | - | 672181  | 672132  |
| Sma-1-9652 | NW_003026470.1 | + | 115935  | 115984  |
| Sma-1-9653 | NW_003026470.1 | - | 312493  | 312444  |
| Sma-1-9654 | NW_003026470.1 | - | 124876  | 124827  |
| Sma-1-9655 | NW_003026604.1 | + | 155724  | 155773  |
| Sma-1-9656 | NW_003026604.1 | + | 175441  | 175490  |
| Sma-1-9657 | NW_003026619.1 | + | 135618  | 135667  |
| Sma-1-9658 | NW_003037793.1 | + | 399042  | 399091  |
| Sma-1-9659 | NW_003037793.1 | + | 1699116 | 1699165 |
| Sma-1-9660 | NW_003037793.1 | + | 2627558 | 2627607 |
| Sma-1-9661 | NW_003037793.1 | + | 3869488 | 3869537 |
| Sma-1-9662 | NW_003037793.1 | + | 4163649 | 4163698 |
| Sma-1-9663 | NW_003037793.1 | - | 3339965 | 3339916 |
| Sma-1-9664 | NW_003037793.1 | - | 2825011 | 2824962 |
| Sma-1-9665 | NW_003037793.1 | - | 1568160 | 1568111 |
| Sma-1-9666 | NW_003037793.1 | - | 1078388 | 1078339 |
| Sma-1-9667 | NW_003037793.1 | - | 441706  | 441657  |
| Sma-1-9668 | NW_003037794.1 | + | 411054  | 411103  |
| Sma-1-9669 | NW_003037794.1 | + | 475128  | 475177  |
| Sma-1-9670 | NW_003037794.1 | + | 681309  | 681358  |
| Sma-1-9671 | NW_003037794.1 | + | 1025586 | 1025635 |
| Sma-1-9672 | NW_003037794.1 | - | 1077023 | 1076974 |
| Sma-1-9673 | NW_003037794.1 | - | 878975  | 878926  |
| Sma-1-9674 | NW_003037795.1 | + | 517140  | 517189  |
| Sma-1-9675 | NW_003037795.1 | + | 828559  | 828608  |
| Sma-1-9676 | NW_003037795.1 | + | 1461545 | 1461594 |



|            |                |   |         |         |
|------------|----------------|---|---------|---------|
| Sma-1-9677 | NW_003037795.1 | - | 1035752 | 1035703 |
| Sma-1-9678 | NW_003037795.1 | - | 516859  | 516810  |
| Sma-1-9679 | NW_003037796.1 | - | 1557310 | 1557261 |
| Sma-1-9680 | NW_003037796.1 | - | 1237619 | 1237570 |
| Sma-1-9681 | NW_003037796.1 | - | 1237219 | 1237170 |
| Sma-1-9682 | NW_003037796.1 | - | 1178425 | 1178376 |
| Sma-1-9683 | NW_003037797.1 | + | 5016    | 5065    |
| Sma-1-9684 | NW_003037797.1 | + | 620580  | 620629  |
| Sma-1-9685 | NW_003037797.1 | + | 1287677 | 1287726 |
| Sma-1-9686 | NW_003037797.1 | + | 1897273 | 1897322 |
| Sma-1-9687 | NW_003037797.1 | + | 2410508 | 2410557 |
| Sma-1-9688 | NW_003037797.1 | + | 3469116 | 3469165 |
| Sma-1-9689 | NW_003037797.1 | + | 3723081 | 3723130 |
| Sma-1-9690 | NW_003037797.1 | - | 2502658 | 2502609 |
| Sma-1-9691 | NW_003037798.1 | + | 628770  | 628819  |
| Sma-1-9692 | NW_003037798.1 | + | 1036931 | 1036980 |
| Sma-1-9693 | NW_003037798.1 | + | 1678446 | 1678495 |
| Sma-1-9694 | NW_003037798.1 | + | 2034553 | 2034602 |
| Sma-1-9695 | NW_003037798.1 | - | 2037117 | 2037068 |
| Sma-1-9696 | NW_003037798.1 | - | 733161  | 733112  |
| Sma-1-9697 | NW_003037798.1 | - | 388763  | 388714  |
| Sma-1-9698 | NW_003037799.1 | + | 643737  | 643786  |
| Sma-1-9699 | NW_003037799.1 | - | 1413449 | 1413400 |
| Sma-1-9700 | NW_003037799.1 | - | 1141189 | 1141140 |
| Sma-1-9701 | NW_003037800.1 | - | 1934672 | 1934623 |
| Sma-1-9702 | NW_003037800.1 | - | 756714  | 756665  |
| Sma-1-9703 | NW_003037801.1 | + | 326834  | 326883  |
| Sma-1-9704 | NW_003037801.1 | - | 808101  | 808052  |
| Sma-1-9705 | NW_003037802.1 | + | 352231  | 352280  |
| Sma-1-9706 | NW_003037803.1 | - | 817744  | 817695  |
| Sma-1-9707 | NW_003037803.1 | - | 186420  | 186371  |
| Sma-1-9708 | NW_003037804.1 | - | 377345  | 377296  |
| Sma-1-9709 | NW_003037806.1 | + | 82145   | 82194   |
| Sma-1-9710 | NW_003037807.1 | + | 787761  | 787810  |
| Sma-1-9711 | NW_003037808.1 | + | 745771  | 745820  |
| Sma-1-9712 | NW_003037808.1 | + | 1867310 | 1867359 |
| Sma-1-9713 | NW_003037808.1 | - | 745563  | 745514  |
| Sma-1-9714 | NW_003037808.1 | - | 249364  | 249315  |
| Sma-1-9715 | NW_003037808.1 | - | 26211   | 26162   |
| Sma-1-9716 | NW_003037809.1 | + | 644145  | 644194  |
| Sma-1-9717 | NW_003037809.1 | + | 731505  | 731554  |
| Sma-1-9718 | NW_003037809.1 | + | 1326880 | 1326929 |
| Sma-1-9719 | NW_003037809.1 | + | 2589116 | 2589165 |
| Sma-1-9720 | NW_003037809.1 | - | 1994765 | 1994716 |
| Sma-1-9721 | NW_003037809.1 | - | 1516056 | 1516007 |
| Sma-1-9722 | NW_003037809.1 | - | 513022  | 512973  |
| Sma-1-9723 | NW_003037809.1 | - | 65763   | 65714   |
| Sma-1-9724 | NW_003037810.1 | + | 752212  | 752261  |
| Sma-1-9725 | NW_003037810.1 | - | 292920  | 292871  |
| Sma-1-9726 | NW_003037812.1 | + | 1249951 | 1250000 |
| Sma-1-9727 | NW_003037813.1 | - | 67930   | 67881   |
| Sma-1-9728 | NW_003037814.1 | - | 1320639 | 1320590 |

|            |                |   |         |         |
|------------|----------------|---|---------|---------|
| Sma-1-9729 | NW_003037815.1 | + | 467542  | 467591  |
| Sma-1-9730 | NW_003037816.1 | - | 618597  | 618548  |
| Sma-1-9731 | NW_003037816.1 | - | 444106  | 444057  |
| Sma-1-9732 | NW_003037817.1 | - | 261994  | 261945  |
| Sma-1-9733 | NW_003037818.1 | + | 1472842 | 1472891 |
| Sma-1-9734 | NW_003037818.1 | + | 1665426 | 1665475 |
| Sma-1-9735 | NW_003037818.1 | - | 1230819 | 1230770 |
| Sma-1-9736 | NW_003037819.1 | + | 1136681 | 1136730 |
| Sma-1-9737 | NW_003037820.1 | + | 607998  | 608047  |
| Sma-1-9738 | NW_003037820.1 | + | 665839  | 665888  |
| Sma-1-9739 | NW_003037820.1 | + | 666837  | 666886  |
| Sma-1-9740 | NW_003037820.1 | - | 753336  | 753287  |
| Sma-1-9741 | NW_003037821.1 | + | 254608  | 254657  |
| Sma-1-9742 | NW_003037821.1 | + | 783237  | 783286  |
| Sma-1-9743 | NW_003037821.1 | + | 992518  | 992567  |
| Sma-1-9744 | NW_003037821.1 | - | 777792  | 777743  |
| Sma-1-9745 | NW_003037822.1 | - | 1451604 | 1451555 |
| Sma-1-9746 | NW_003037822.1 | - | 381903  | 381854  |
| Sma-1-9747 | NW_003037822.1 | - | 378187  | 378138  |
| Sma-1-9748 | NW_003037824.1 | - | 515590  | 515541  |
| Sma-1-9749 | NW_003037825.1 | + | 943168  | 943217  |
| Sma-1-9750 | NW_003037825.1 | + | 1644574 | 1644623 |
| Sma-1-9751 | NW_003037825.1 | - | 1830096 | 1830047 |
| Sma-1-9752 | NW_003037825.1 | - | 942887  | 942838  |
| Sma-1-9753 | NW_003037825.1 | - | 407161  | 407112  |
| Sma-1-9754 | NW_003037826.1 | + | 1123657 | 1123706 |
| Sma-1-9755 | NW_003037826.1 | - | 1126098 | 1126049 |
| Sma-1-9756 | NW_003037827.1 | + | 789267  | 789316  |
| Sma-1-9757 | NW_003037827.1 | + | 1441526 | 1441575 |
| Sma-1-9758 | NW_003037827.1 | + | 2268494 | 2268543 |
| Sma-1-9759 | NW_003037827.1 | - | 551669  | 551620  |
| Sma-1-9760 | NW_003037827.1 | - | 426390  | 426341  |
| Sma-1-9761 | NW_003037829.1 | - | 1685205 | 1685156 |
| Sma-1-9762 | NW_003037830.1 | - | 1337413 | 1337364 |
| Sma-1-9763 | NW_003037830.1 | - | 267804  | 267755  |
| Sma-1-9764 | NW_003037831.1 | + | 1352567 | 1352616 |
| Sma-1-9765 | NW_003037831.1 | - | 1712324 | 1712275 |
| Sma-1-9766 | NW_003037831.1 | - | 1159756 | 1159707 |
| Sma-1-9767 | NW_003037832.1 | + | 839485  | 839534  |
| Sma-1-9768 | NW_003037832.1 | - | 120332  | 120283  |
| Sma-1-9769 | NW_003037834.1 | + | 96882   | 96931   |
| Sma-1-9770 | NW_003037834.1 | + | 710868  | 710917  |
| Sma-1-9771 | NW_003037835.1 | - | 777125  | 777076  |
| Sma-1-9772 | NW_003037836.1 | + | 912517  | 912566  |
| Sma-1-9773 | NW_003037837.1 | + | 1130348 | 1130397 |
| Sma-1-9774 | NW_003037837.1 | - | 591867  | 591818  |
| Sma-1-9775 | NW_003037838.1 | + | 740444  | 740493  |
| Sma-1-9776 | NW_003037839.1 | - | 1632412 | 1632363 |
| Sma-1-9777 | NW_003037839.1 | - | 1173283 | 1173234 |
| Sma-1-9778 | NW_003037839.1 | - | 766498  | 766449  |
| Sma-1-9779 | NW_003037840.1 | + | 368434  | 368483  |
| Sma-1-9780 | NW_003037840.1 | + | 616975  | 617024  |

|            |                |   |         |         |
|------------|----------------|---|---------|---------|
| Sma-1-9781 | NW_003037840.1 | + | 1865572 | 1865621 |
| Sma-1-9782 | NW_003037840.1 | - | 777266  | 777217  |
| Sma-1-9783 | NW_003037841.1 | + | 196355  | 196404  |
| Sma-1-9784 | NW_003037841.1 | + | 1424053 | 1424102 |
| Sma-1-9785 | NW_003037841.1 | - | 1099422 | 1099373 |
| Sma-1-9786 | NW_003037841.1 | - | 480504  | 480455  |
| Sma-1-9787 | NW_003037842.1 | + | 483577  | 483626  |
| Sma-1-9788 | NW_003037842.1 | - | 65189   | 65140   |
| Sma-1-9789 | NW_003037845.1 | + | 230906  | 230955  |
| Sma-1-9790 | NW_003037845.1 | - | 344254  | 344205  |
| Sma-1-9791 | NW_003037846.1 | + | 189010  | 189059  |
| Sma-1-9792 | NW_003037846.1 | - | 75243   | 75194   |
| Sma-1-9793 | NW_003037846.1 | - | 74842   | 74793   |
| Sma-1-9794 | NW_003037846.1 | - | 74441   | 74392   |
| Sma-1-9795 | NW_003037846.1 | - | 62587   | 62538   |
| Sma-1-9796 | NW_003037847.1 | + | 625177  | 625226  |
| Sma-1-9797 | NW_003037847.1 | - | 678837  | 678788  |
| Sma-1-9798 | NW_003037847.1 | - | 442705  | 442656  |
| Sma-1-9799 | NW_003037848.1 | + | 561611  | 561660  |
| Sma-1-9800 | NW_003037848.1 | - | 404260  | 404211  |
| Sma-1-9801 | NW_003037849.1 | - | 241798  | 241749  |
| Sma-1-9802 | NW_003037853.1 | + | 332689  | 332738  |
| Sma-1-9803 | NW_003037853.1 | + | 1043228 | 1043277 |
| Sma-1-9804 | NW_003037853.1 | - | 332467  | 332418  |
| Sma-1-9805 | NW_003037858.1 | - | 896459  | 896410  |
| Sma-1-9806 | NW_003037859.1 | + | 692580  | 692629  |
| Sma-1-9807 | NW_003037859.1 | - | 787658  | 787609  |
| Sma-1-9808 | NW_003037860.1 | + | 15002   | 15051   |
| Sma-1-9809 | NW_003037860.1 | + | 416488  | 416537  |
| Sma-1-9810 | NW_003037860.1 | - | 415496  | 415447  |
| Sma-1-9811 | NW_003037861.1 | + | 855200  | 855249  |
| Sma-1-9812 | NW_003037861.1 | - | 163832  | 163783  |
| Sma-1-9813 | NW_003037862.1 | - | 967350  | 967301  |
| Sma-1-9814 | NW_003037863.1 | + | 291919  | 291968  |
| Sma-1-9815 | NW_003037863.1 | + | 1170759 | 1170808 |
| Sma-1-9816 | NW_003037863.1 | + | 1711522 | 1711571 |
| Sma-1-9817 | NW_003037863.1 | - | 501514  | 501465  |
| Sma-1-9818 | NW_003037864.1 | + | 156862  | 156911  |
| Sma-1-9819 | NW_003037864.1 | + | 748792  | 748841  |
| Sma-1-9820 | NW_003037864.1 | + | 1736604 | 1736653 |
| Sma-1-9821 | NW_003037864.1 | - | 1736147 | 1736098 |
| Sma-1-9822 | NW_003037866.1 | + | 1252768 | 1252817 |
| Sma-1-9823 | NW_003037866.1 | - | 1372444 | 1372395 |
| Sma-1-9824 | NW_003037866.1 | - | 1250241 | 1250192 |
| Sma-1-9825 | NW_003037866.1 | - | 1220931 | 1220882 |
| Sma-1-9826 | NW_003037866.1 | - | 867250  | 867201  |
| Sma-1-9827 | NW_003037869.1 | - | 113192  | 113143  |
| Sma-1-9828 | NW_003037871.1 | + | 197826  | 197875  |
| Sma-1-9829 | NW_003037877.1 | + | 682788  | 682837  |
| Sma-1-9830 | NW_003037878.1 | - | 450594  | 450545  |
| Sma-1-9831 | NW_003037882.1 | + | 151317  | 151366  |
| Sma-1-9832 | NW_003037882.1 | - | 236123  | 236074  |

|            |                |   |         |         |
|------------|----------------|---|---------|---------|
| Sma-1-9833 | NW_003037882.1 | - | 133355  | 133306  |
| Sma-1-9834 | NW_003037884.1 | - | 2858    | 2809    |
| Sma-1-9835 | NW_003037885.1 | - | 294024  | 293975  |
| Sma-1-9836 | NW_003037886.1 | - | 802026  | 801977  |
| Sma-1-9837 | NW_003037888.1 | + | 252578  | 252627  |
| Sma-1-9838 | NW_003037888.1 | - | 990349  | 990300  |
| Sma-1-9839 | NW_003037888.1 | - | 258122  | 258073  |
| Sma-1-9840 | NW_003037889.1 | + | 201179  | 201228  |
| Sma-1-9841 | NW_003037889.1 | + | 788879  | 788928  |
| Sma-1-9842 | NW_003037889.1 | + | 1695147 | 1695196 |
| Sma-1-9843 | NW_003037889.1 | - | 365586  | 365537  |
| Sma-1-9844 | NW_003037890.1 | + | 1095281 | 1095330 |
| Sma-1-9845 | NW_003037890.1 | + | 1174629 | 1174678 |
| Sma-1-9846 | NW_003037890.1 | + | 2007444 | 2007493 |
| Sma-1-9847 | NW_003037890.1 | - | 64961   | 64912   |
| Sma-1-9848 | NW_003037891.1 | + | 1269508 | 1269557 |
| Sma-1-9849 | NW_003037891.1 | + | 1975794 | 1975843 |
| Sma-1-9850 | NW_003037891.1 | - | 2012528 | 2012479 |
| Sma-1-9851 | NW_003037891.1 | - | 1269345 | 1269296 |
| Sma-1-9852 | NW_003037891.1 | - | 268091  | 268042  |
| Sma-1-9853 | NW_003037892.1 | - | 82175   | 82126   |
| Sma-1-9854 | NW_003037894.1 | + | 152464  | 152513  |
| Sma-1-9855 | NW_003037899.1 | + | 551287  | 551336  |
| Sma-1-9856 | NW_003037899.1 | - | 69461   | 69412   |
| Sma-1-9857 | NW_003037901.1 | + | 805191  | 805240  |
| Sma-1-9858 | NW_003037903.1 | + | 715716  | 715765  |
| Sma-1-9859 | NW_003037903.1 | - | 715318  | 715269  |
| Sma-1-9860 | NW_003037904.1 | - | 345961  | 345912  |
| Sma-1-9861 | NW_003037905.1 | + | 261751  | 261800  |
| Sma-1-9862 | NW_003037905.1 | + | 262151  | 262200  |
| Sma-1-9863 | NW_003037905.1 | + | 266992  | 267041  |
| Sma-1-9864 | NW_003037905.1 | - | 261471  | 261422  |
| Sma-1-9865 | NW_003037907.1 | + | 345078  | 345127  |
| Sma-1-9866 | NW_003037907.1 | + | 801440  | 801489  |
| Sma-1-9867 | NW_003037908.1 | - | 706237  | 706188  |
| Sma-1-9868 | NW_003037909.1 | + | 267529  | 267578  |
| Sma-1-9869 | NW_003037909.1 | + | 634922  | 634971  |
| Sma-1-9870 | NW_003037909.1 | - | 272672  | 272623  |
| Sma-1-9871 | NW_003037911.1 | + | 952644  | 952693  |
| Sma-1-9872 | NW_003037911.1 | - | 832225  | 832176  |
| Sma-1-9873 | NW_003037911.1 | - | 604427  | 604378  |
| Sma-1-9874 | NW_003037911.1 | - | 197313  | 197264  |
| Sma-1-9875 | NW_003037911.1 | - | 196912  | 196863  |
| Sma-1-9876 | NW_003037912.1 | + | 383982  | 384031  |
| Sma-1-9877 | NW_003037912.1 | - | 382954  | 382905  |
| Sma-1-9878 | NW_003037913.1 | + | 405406  | 405455  |
| Sma-1-9879 | NW_003037916.1 | + | 158153  | 158202  |
| Sma-1-9880 | NW_003037916.1 | + | 278190  | 278239  |
| Sma-1-9881 | NW_003037916.1 | - | 1466781 | 1466732 |
| Sma-1-9882 | NW_003037916.1 | - | 692823  | 692774  |
| Sma-1-9883 | NW_003037916.1 | - | 371013  | 370964  |
| Sma-1-9884 | NW_003037917.1 | + | 1116550 | 1116599 |

|            |                |   |         |         |
|------------|----------------|---|---------|---------|
| Sma-1-9885 | NW_003037918.1 | + | 792749  | 792798  |
| Sma-1-9886 | NW_003037918.1 | + | 1656394 | 1656443 |
| Sma-1-9887 | NW_003037918.1 | - | 1963748 | 1963699 |
| Sma-1-9888 | NW_003037918.1 | - | 1943973 | 1943924 |
| Sma-1-9889 | NW_003037918.1 | - | 1846404 | 1846355 |
| Sma-1-9890 | NW_003037918.1 | - | 1015396 | 1015347 |
| Sma-1-9891 | NW_003037918.1 | - | 82667   | 82618   |
| Sma-1-9892 | NW_003037921.1 | - | 103909  | 103860  |
| Sma-1-9893 | NW_003037921.1 | - | 49052   | 49003   |
| Sma-1-9894 | NW_003037922.1 | + | 216252  | 216301  |
| Sma-1-9895 | NW_003037924.1 | + | 338821  | 338870  |
| Sma-1-9896 | NW_003037925.1 | + | 238504  | 238553  |
| Sma-1-9897 | NW_003037928.1 | + | 170389  | 170438  |
| Sma-1-9898 | NW_003037928.1 | + | 764753  | 764802  |
| Sma-1-9899 | NW_003037928.1 | - | 45280   | 45231   |
| Sma-1-9900 | NW_003037930.1 | - | 207227  | 207178  |
| Sma-1-9901 | NW_003037931.1 | - | 597468  | 597419  |
| Sma-1-9902 | NW_003037932.1 | + | 616036  | 616085  |
| Sma-1-9903 | NW_003037932.1 | - | 819114  | 819065  |
| Sma-1-9904 | NW_003037933.1 | + | 304755  | 304804  |
| Sma-1-9905 | NW_003037933.1 | + | 348980  | 349029  |
| Sma-1-9906 | NW_003037935.1 | - | 600365  | 600316  |
| Sma-1-9907 | NW_003037935.1 | - | 287722  | 287673  |
| Sma-1-9908 | NW_003037938.1 | + | 188678  | 188727  |
| Sma-1-9909 | NW_003037938.1 | + | 349439  | 349488  |
| Sma-1-9910 | NW_003037938.1 | + | 754107  | 754156  |
| Sma-1-9911 | NW_003037938.1 | - | 554259  | 554210  |
| Sma-1-9912 | NW_003037938.1 | - | 186758  | 186709  |
| Sma-1-9913 | NW_003037939.1 | + | 596516  | 596565  |
| Sma-1-9914 | NW_003037939.1 | - | 228432  | 228383  |
| Sma-1-9915 | NW_003037940.1 | - | 468249  | 468200  |
| Sma-1-9916 | NW_003037940.1 | - | 383128  | 383079  |
| Sma-1-9917 | NW_003037943.1 | + | 1088970 | 1089019 |
| Sma-1-9918 | NW_003037943.1 | - | 1077189 | 1077140 |
| Sma-1-9919 | NW_003037943.1 | - | 473302  | 473253  |
| Sma-1-9920 | NW_003037943.1 | - | 285294  | 285245  |
| Sma-1-9921 | NW_003037944.1 | - | 527361  | 527312  |
| Sma-1-9922 | NW_003037945.1 | - | 445079  | 445030  |
| Sma-1-9923 | NW_003037945.1 | - | 374296  | 374247  |
| Sma-1-9924 | NW_003037946.1 | + | 280009  | 280058  |
| Sma-1-9925 | NW_003037946.1 | + | 880606  | 880655  |
| Sma-1-9926 | NW_003037948.1 | - | 173706  | 173657  |
| Sma-1-9927 | NW_003037953.1 | + | 168409  | 168458  |
| Sma-1-9928 | NW_003037954.1 | - | 275279  | 275230  |
| Sma-1-9929 | NW_003037961.1 | + | 341569  | 341618  |
| Sma-1-9930 | NW_003037963.1 | - | 230327  | 230278  |
| Sma-1-9931 | NW_003037963.1 | - | 184425  | 184376  |
| Sma-1-9932 | NW_003037964.1 | - | 383937  | 383888  |
| Sma-1-9933 | NW_003037966.1 | + | 341915  | 341964  |
| Sma-1-9934 | NW_003037966.1 | + | 384123  | 384172  |
| Sma-1-9935 | NW_003037966.1 | - | 84994   | 84945   |
| Sma-1-9936 | NW_003037967.1 | + | 89512   | 89561   |

|            |                |   |         |         |
|------------|----------------|---|---------|---------|
| Sma-1-9937 | NW_003037970.1 | + | 188901  | 188950  |
| Sma-1-9938 | NW_003037972.1 | + | 305924  | 305973  |
| Sma-1-9939 | NW_003037972.1 | + | 460770  | 460819  |
| Sma-1-9940 | NW_003037972.1 | - | 579869  | 579820  |
| Sma-1-9941 | NW_003037972.1 | - | 459872  | 459823  |
| Sma-1-9942 | NW_003037972.1 | - | 305567  | 305518  |
| Sma-1-9943 | NW_003037972.1 | - | 302841  | 302792  |
| Sma-1-9944 | NW_003037973.1 | - | 433783  | 433734  |
| Sma-1-9945 | NW_003037973.1 | - | 197247  | 197198  |
| Sma-1-9946 | NW_003037974.1 | - | 510040  | 509991  |
| Sma-1-9947 | NW_003037975.1 | - | 580870  | 580821  |
| Sma-1-9948 | NW_003037977.1 | - | 939432  | 939383  |
| Sma-1-9949 | NW_003037977.1 | - | 338582  | 338533  |
| Sma-1-9950 | NW_003037979.1 | + | 257948  | 257997  |
| Sma-1-9951 | NW_003037979.1 | - | 257650  | 257601  |
| Sma-1-9952 | NW_003037980.1 | + | 1260880 | 1260929 |
| Sma-1-9953 | NW_003037980.1 | - | 1166155 | 1166106 |
| Sma-1-9954 | NW_003037981.1 | + | 529302  | 529351  |
| Sma-1-9955 | NW_003037981.1 | + | 838489  | 838538  |
| Sma-1-9956 | NW_003037981.1 | + | 857249  | 857298  |
| Sma-1-9957 | NW_003037981.1 | - | 1178811 | 1178762 |
| Sma-1-9958 | NW_003037981.1 | - | 625324  | 625275  |
| Sma-1-9959 | NW_003037981.1 | - | 511492  | 511443  |
| Sma-1-9960 | NW_003037981.1 | - | 497436  | 497387  |
| Sma-1-9961 | NW_003037981.1 | - | 444655  | 444606  |
| Sma-1-9962 | NW_003037981.1 | - | 86773   | 86724   |
| Sma-1-9963 | NW_003037993.1 | + | 79281   | 79330   |
| Sma-1-9964 | NW_003037994.1 | + | 263338  | 263387  |
| Sma-1-9965 | NW_003037994.1 | - | 284792  | 284743  |
| Sma-1-9966 | NW_003037997.1 | + | 451904  | 451953  |
| Sma-1-9967 | NW_003037997.1 | - | 433819  | 433770  |
| Sma-1-9968 | NW_003037997.1 | - | 143354  | 143305  |
| Sma-1-9969 | NW_003037999.1 | - | 352422  | 352373  |
| Sma-1-9970 | NW_003038001.1 | + | 7315    | 7364    |
| Sma-1-9971 | NW_003038001.1 | + | 30176   | 30225   |
| Sma-1-9972 | NW_003038001.1 | + | 104803  | 104852  |
| Sma-1-9973 | NW_003038008.1 | + | 131432  | 131481  |
| Sma-1-9974 | NW_003038008.1 | + | 348150  | 348199  |
| Sma-1-9975 | NW_003038010.1 | + | 441215  | 441264  |
| Sma-1-9976 | NW_003038014.1 | + | 486861  | 486910  |
| Sma-1-9977 | NW_003038015.1 | - | 414897  | 414848  |
| Sma-1-9978 | NW_003038018.1 | + | 17841   | 17890   |
| Sma-1-9979 | NW_003038018.1 | + | 368530  | 368579  |
| Sma-1-9980 | NW_003038018.1 | - | 848763  | 848714  |
| Sma-1-9981 | NW_003038018.1 | - | 549077  | 549028  |
| Sma-1-9982 | NW_003038019.1 | - | 374888  | 374839  |
| Sma-1-9983 | NW_003038020.1 | + | 524689  | 524738  |
| Sma-1-9984 | NW_003038020.1 | - | 524534  | 524485  |
| Sma-1-9985 | NW_003038023.1 | + | 617829  | 617878  |
| Sma-1-9986 | NW_003038027.1 | + | 662461  | 662510  |
| Sma-1-9987 | NW_003038027.1 | - | 273576  | 273527  |
| Sma-1-9988 | NW_003038028.1 | + | 653297  | 653346  |

|             |                |   |         |         |
|-------------|----------------|---|---------|---------|
| Sma-1-9989  | NW_003038028.1 | + | 755689  | 755738  |
| Sma-1-9990  | NW_003038031.1 | + | 358992  | 359041  |
| Sma-1-9991  | NW_003038031.1 | - | 863672  | 863623  |
| Sma-1-9992  | NW_003038032.1 | - | 524322  | 524273  |
| Sma-1-9993  | NW_003038033.1 | - | 199150  | 199101  |
| Sma-1-9994  | NW_003038033.1 | - | 50039   | 49990   |
| Sma-1-9995  | NW_003038035.1 | - | 1052514 | 1052465 |
| Sma-1-9996  | NW_003038035.1 | - | 1033237 | 1033188 |
| Sma-1-9997  | NW_003038036.1 | + | 4621    | 4670    |
| Sma-1-9998  | NW_003038036.1 | + | 271136  | 271185  |
| Sma-1-9999  | NW_003038037.1 | - | 1629119 | 1629070 |
| Sma-1-10000 | NW_003038037.1 | - | 842282  | 842233  |
| Sma-1-10001 | NW_003038037.1 | - | 695977  | 695928  |
| Sma-1-10002 | NW_003038038.1 | - | 523127  | 523078  |
| Sma-1-10003 | NW_003038072.1 | - | 200145  | 200096  |
| Sma-1-10004 | NW_003038230.1 | + | 1406    | 1455    |
| Sma-1-10005 | NW_003038230.1 | - | 282309  | 282260  |
| Sma-1-10006 | NW_003038230.1 | - | 278651  | 278602  |
| Sma-1-10007 | NW_003038233.1 | - | 21201   | 21152   |
| Sma-1-10008 | NW_003038237.1 | - | 114463  | 114414  |
| Sma-1-10009 | NW_003038238.1 | + | 111821  | 111870  |
| Sma-1-10010 | NW_003038239.1 | - | 216088  | 216039  |
| Sma-1-10011 | NW_003038239.1 | - | 34600   | 34551   |
| Sma-1-10012 | NW_003038240.1 | - | 86360   | 86311   |
| Sma-1-10013 | NW_003038247.1 | + | 361430  | 361479  |
| Sma-1-10014 | NW_003038247.1 | - | 339782  | 339733  |
| Sma-1-10015 | NW_003038251.1 | - | 236126  | 236077  |
| Sma-1-10016 | NW_003038251.1 | - | 235723  | 235674  |
| Sma-1-10017 | NW_003038254.1 | - | 4901    | 4852    |
| Sma-1-10018 | NW_003038257.1 | + | 318105  | 318154  |
| Sma-1-10019 | NW_003038257.1 | - | 559126  | 559077  |
| Sma-1-10020 | NW_003038260.1 | - | 321345  | 321296  |
| Sma-1-10021 | NW_003038261.1 | + | 16709   | 16758   |
| Sma-1-10022 | NW_003038261.1 | + | 1014479 | 1014528 |
| Sma-1-10023 | NW_003038261.1 | - | 481087  | 481038  |
| Sma-1-10024 | NW_003038513.1 | + | 143729  | 143778  |
| Sma-1-10025 | NW_003039127.1 | + | 2844    | 2893    |
| Sma-1-10026 | NW_003039127.1 | - | 901316  | 901267  |
| Sma-1-10027 | NW_003039127.1 | - | 515624  | 515575  |
| Sma-1-10028 | NW_003039127.1 | - | 515223  | 515174  |
| Sma-1-10029 | NW_003039127.1 | - | 262952  | 262903  |
| Sma-1-10030 | NW_003026474.1 | + | 85592   | 85641   |
| Sma-1-10031 | NW_003026474.1 | - | 124381  | 124332  |
| Sma-1-10032 | NW_003026483.1 | - | 136975  | 136926  |
| Sma-1-10033 | NW_003026490.1 | - | 425088  | 425039  |
| Sma-1-10034 | NW_003026503.1 | + | 55120   | 55169   |
| Sma-1-10035 | NW_003026515.1 | + | 75625   | 75674   |
| Sma-1-10036 | NW_003026516.1 | + | 278901  | 278950  |
| Sma-1-10037 | NW_003026517.1 | - | 724123  | 724074  |
| Sma-1-10038 | NW_003038041.1 | + | 84446   | 84495   |
| Sma-1-10039 | NW_003038042.1 | - | 79283   | 79234   |
| Sma-1-10040 | NW_003038044.1 | + | 136166  | 136215  |

|             |                |   |        |        |
|-------------|----------------|---|--------|--------|
| Sma-1-10041 | NW_003038046.1 | + | 164571 | 164620 |
| Sma-1-10042 | NW_003038050.1 | - | 236913 | 236864 |
| Sma-1-10043 | NW_003038050.1 | - | 65892  | 65843  |
| Sma-1-10044 | NW_003038051.1 | - | 40808  | 40759  |
| Sma-1-10045 | NW_003038053.1 | - | 344773 | 344724 |
| Sma-1-10046 | NW_003038055.1 | + | 38880  | 38929  |
| Sma-1-10047 | NW_003038057.1 | - | 185908 | 185859 |
| Sma-1-10048 | NW_003038059.1 | - | 303751 | 303702 |
| Sma-1-10049 | NW_003038077.1 | + | 417421 | 417470 |
| Sma-1-10050 | NW_003038077.1 | - | 268463 | 268414 |
| Sma-1-10051 | NW_003038080.1 | + | 550111 | 550160 |
| Sma-1-10052 | NW_003038081.1 | + | 71815  | 71864  |
| Sma-1-10053 | NW_003038082.1 | + | 239234 | 239283 |
| Sma-1-10054 | NW_003038082.1 | + | 681281 | 681330 |
| Sma-1-10055 | NW_003038082.1 | - | 680679 | 680630 |
| Sma-1-10056 | NW_003038082.1 | - | 6613   | 6564   |
| Sma-1-10057 | NW_003038084.1 | + | 151300 | 151349 |
| Sma-1-10058 | NW_003038084.1 | - | 151012 | 150963 |
| Sma-1-10059 | NW_003038086.1 | + | 366504 | 366553 |
| Sma-1-10060 | NW_003038086.1 | - | 164115 | 164066 |
| Sma-1-10061 | NW_003038105.1 | + | 51458  | 51507  |
| Sma-1-10062 | NW_003038105.1 | - | 51273  | 51224  |
| Sma-1-10063 | NW_003038108.1 | + | 39953  | 40002  |
| Sma-1-10064 | NW_003038108.1 | + | 107062 | 107111 |
| Sma-1-10065 | NW_003038110.1 | + | 118615 | 118664 |
| Sma-1-10066 | NW_003038110.1 | - | 118367 | 118318 |
| Sma-1-10067 | NW_003038114.1 | - | 139203 | 139154 |
| Sma-1-10068 | NW_003038119.1 | - | 221076 | 221027 |
| Sma-1-10069 | NW_003038119.1 | - | 175284 | 175235 |
| Sma-1-10070 | NW_003038126.1 | + | 135581 | 135630 |
| Sma-1-10071 | NW_003038126.1 | + | 135981 | 136030 |
| Sma-1-10072 | NW_003038126.1 | + | 136381 | 136430 |
| Sma-1-10073 | NW_003038126.1 | + | 159189 | 159238 |
| Sma-1-10074 | NW_003038126.1 | - | 135183 | 135134 |
| Sma-1-10075 | NW_003038126.1 | - | 134783 | 134734 |
| Sma-1-10076 | NW_003038127.1 | + | 96458  | 96507  |
| Sma-1-10077 | NW_003038129.1 | + | 87     | 136    |
| Sma-1-10078 | NW_003038129.1 | + | 36782  | 36831  |
| Sma-1-10079 | NW_003038130.1 | - | 315256 | 315207 |
| Sma-1-10080 | NW_003038131.1 | + | 53328  | 53377  |
| Sma-1-10081 | NW_003038131.1 | - | 374171 | 374122 |
| Sma-1-10082 | NW_003038131.1 | - | 344731 | 344682 |
| Sma-1-10083 | NW_003038132.1 | + | 184386 | 184435 |
| Sma-1-10084 | NW_003038132.1 | - | 259661 | 259612 |
| Sma-1-10085 | NW_003038136.1 | + | 19933  | 19982  |
| Sma-1-10086 | NW_003038136.1 | + | 69343  | 69392  |
| Sma-1-10087 | NW_003038138.1 | - | 461714 | 461665 |
| Sma-1-10088 | NW_003038147.1 | + | 359712 | 359761 |
| Sma-1-10089 | NW_003038151.1 | - | 169941 | 169892 |
| Sma-1-10090 | NW_003038155.1 | + | 334398 | 334447 |
| Sma-1-10091 | NW_003038155.1 | + | 501714 | 501763 |
| Sma-1-10092 | NW_003038157.1 | + | 250092 | 250141 |



|             |                |   |          |          |
|-------------|----------------|---|----------|----------|
| Sma-1-10093 | NW_003038163.1 | + | 61002    | 61051    |
| Sma-1-10094 | NW_003038163.1 | + | 61401    | 61450    |
| Sma-1-10095 | NW_003038163.1 | - | 467069   | 467020   |
| Sma-1-10096 | NW_003038169.1 | + | 39677    | 39726    |
| Sma-1-10097 | NW_003038169.1 | - | 52651    | 52602    |
| Sma-1-10098 | NW_003038183.1 | + | 68654    | 68703    |
| Sma-1-10099 | NW_003038196.1 | + | 91692    | 91741    |
| Sma-1-10100 | NS_000200.1    | + | 399042   | 399091   |
| Sma-1-10101 | NS_000200.1    | + | 1699116  | 1699165  |
| Sma-1-10102 | NS_000200.1    | + | 2627558  | 2627607  |
| Sma-1-10103 | NS_000200.1    | + | 3869488  | 3869537  |
| Sma-1-10104 | NS_000200.1    | + | 4163649  | 4163698  |
| Sma-1-10105 | NS_000200.1    | + | 4590649  | 4590698  |
| Sma-1-10106 | NS_000200.1    | + | 4654723  | 4654772  |
| Sma-1-10107 | NS_000200.1    | + | 4860904  | 4860953  |
| Sma-1-10108 | NS_000200.1    | + | 5205181  | 5205230  |
| Sma-1-10109 | NS_000200.1    | + | 6908023  | 6908072  |
| Sma-1-10110 | NS_000200.1    | + | 7219442  | 7219491  |
| Sma-1-10111 | NS_000200.1    | + | 7852428  | 7852477  |
| Sma-1-10112 | NS_000200.1    | + | 10432876 | 10432925 |
| Sma-1-10113 | NS_000200.1    | + | 11048440 | 11048489 |
| Sma-1-10114 | NS_000200.1    | + | 11715537 | 11715586 |
| Sma-1-10115 | NS_000200.1    | + | 12325133 | 12325182 |
| Sma-1-10116 | NS_000200.1    | + | 12838368 | 12838417 |
| Sma-1-10117 | NS_000200.1    | + | 13896976 | 13897025 |
| Sma-1-10118 | NS_000200.1    | + | 14150941 | 14150990 |
| Sma-1-10119 | NS_000200.1    | + | 14887928 | 14887977 |
| Sma-1-10120 | NS_000200.1    | + | 15296089 | 15296138 |
| Sma-1-10121 | NS_000200.1    | + | 15937604 | 15937653 |
| Sma-1-10122 | NS_000200.1    | + | 16293711 | 16293760 |
| Sma-1-10123 | NS_000200.1    | + | 17634091 | 17634140 |
| Sma-1-10124 | NS_000200.1    | + | 21416314 | 21416363 |
| Sma-1-10125 | NS_000200.1    | + | 22355025 | 22355074 |
| Sma-1-10126 | NS_000200.1    | + | 28277359 | 28277408 |
| Sma-1-10127 | NS_000200.1    | + | 31049277 | 31049326 |
| Sma-1-10128 | NS_000200.1    | + | 32532408 | 32532457 |
| Sma-1-10129 | NS_000200.1    | + | 33653947 | 33653996 |
| Sma-1-10130 | NS_000200.1    | + | 34308609 | 34308658 |
| Sma-1-10131 | NS_000200.1    | + | 34395969 | 34396018 |
| Sma-1-10132 | NS_000200.1    | + | 34991344 | 34991393 |
| Sma-1-10133 | NS_000200.1    | + | 36253580 | 36253629 |
| Sma-1-10134 | NS_000200.1    | + | 37356734 | 37356783 |
| Sma-1-10135 | NS_000200.1    | + | 40732690 | 40732739 |
| Sma-1-10136 | NS_000200.1    | + | 45730533 | 45730582 |
| Sma-1-10137 | NS_000200.1    | + | 50188249 | 50188298 |
| Sma-1-10138 | NS_000200.1    | + | 50380833 | 50380882 |
| Sma-1-10139 | NS_000200.1    | + | 52224946 | 52224995 |
| Sma-1-10140 | NS_000200.1    | + | 52880980 | 52881029 |
| Sma-1-10141 | NS_000200.1    | + | 52938821 | 52938870 |
| Sma-1-10142 | NS_000200.1    | + | 52939819 | 52939868 |
| Sma-1-10143 | NS_000200.1    | + | 53399092 | 53399141 |
| Sma-1-10144 | NS_000200.1    | + | 53927721 | 53927770 |

|             |             |   |           |           |
|-------------|-------------|---|-----------|-----------|
| Sma-1-10145 | NS_000200.1 | + | 54137002  | 54137051  |
| Sma-1-10146 | NS_000200.1 | + | 60072950  | 60072999  |
| Sma-1-10147 | NS_000200.1 | + | 60774356  | 60774405  |
| Sma-1-10148 | NS_000200.1 | + | 62123173  | 62123222  |
| Sma-1-10149 | NS_000200.1 | + | 63411408  | 63411457  |
| Sma-1-10150 | NS_000200.1 | + | 64063667  | 64063716  |
| Sma-1-10151 | NS_000200.1 | + | 64890635  | 64890684  |
| Sma-1-10152 | NS_000200.1 | + | 70801869  | 70801918  |
| Sma-1-10153 | NS_000200.1 | + | 72048916  | 72048965  |
| Sma-1-10154 | NS_000200.1 | + | 73257368  | 73257417  |
| Sma-1-10155 | NS_000200.1 | + | 73871354  | 73871403  |
| Sma-1-10156 | NS_000200.1 | + | 76469616  | 76469665  |
| Sma-1-10157 | NS_000200.1 | + | 77936206  | 77936255  |
| Sma-1-10158 | NS_000200.1 | + | 78739007  | 78739056  |
| Sma-1-10159 | NS_000200.1 | + | 80991758  | 80991807  |
| Sma-1-10160 | NS_000200.1 | + | 81240299  | 81240348  |
| Sma-1-10161 | NS_000200.1 | + | 82488896  | 82488945  |
| Sma-1-10162 | NS_000200.1 | + | 82807536  | 82807585  |
| Sma-1-10163 | NS_000200.1 | + | 84035234  | 84035283  |
| Sma-1-10164 | NS_000200.1 | + | 85582767  | 85582816  |
| Sma-1-10165 | NS_000200.1 | + | 87232809  | 87232858  |
| Sma-1-10166 | NS_000200.1 | + | 87823580  | 87823629  |
| Sma-1-10167 | NS_000200.1 | + | 89276907  | 89276956  |
| Sma-1-10168 | NS_000200.1 | + | 90254682  | 90254731  |
| Sma-1-10169 | NS_000200.1 | + | 95824740  | 95824789  |
| Sma-1-10170 | NS_000200.1 | + | 96535279  | 96535328  |
| Sma-1-10171 | NS_000200.1 | + | 103371421 | 103371470 |
| Sma-1-10172 | NS_000200.1 | + | 103758030 | 103758079 |
| Sma-1-10173 | NS_000200.1 | + | 104159516 | 104159565 |
| Sma-1-10174 | NS_000200.1 | + | 105631654 | 105631703 |
| Sma-1-10175 | NS_000200.1 | + | 107050286 | 107050335 |
| Sma-1-10176 | NS_000200.1 | + | 107929126 | 107929175 |
| Sma-1-10177 | NS_000200.1 | + | 108469889 | 108469938 |
| Sma-1-10178 | NS_000200.1 | + | 108649436 | 108649485 |
| Sma-1-10179 | NS_000200.1 | + | 109241366 | 109241415 |
| Sma-1-10180 | NS_000200.1 | + | 110229178 | 110229227 |
| Sma-1-10181 | NS_000200.1 | + | 112740567 | 112740616 |
| Sma-1-10182 | NS_000200.1 | + | 113080343 | 113080392 |
| Sma-1-10183 | NS_000200.1 | + | 117645564 | 117645613 |
| Sma-1-10184 | NS_000200.1 | + | 120537600 | 120537649 |
| Sma-1-10185 | NS_000200.1 | + | 121721350 | 121721399 |
| Sma-1-10186 | NS_000200.1 | + | 125442991 | 125443040 |
| Sma-1-10187 | NS_000200.1 | + | 132461070 | 132461119 |
| Sma-1-10188 | NS_000200.1 | + | 133977669 | 133977718 |
| Sma-1-10189 | NS_000200.1 | + | 134565369 | 134565418 |
| Sma-1-10190 | NS_000200.1 | + | 135471637 | 135471686 |
| Sma-1-10191 | NS_000200.1 | + | 136778642 | 136778691 |
| Sma-1-10192 | NS_000200.1 | + | 136857990 | 136858039 |
| Sma-1-10193 | NS_000200.1 | + | 137690805 | 137690854 |
| Sma-1-10194 | NS_000200.1 | + | 139150786 | 139150835 |
| Sma-1-10195 | NS_000200.1 | + | 139857072 | 139857121 |
| Sma-1-10196 | NS_000200.1 | + | 142049037 | 142049086 |

|             |             |   |           |           |
|-------------|-------------|---|-----------|-----------|
| Sma-1-10197 | NS_000200.1 | + | 145070398 | 145070447 |
| Sma-1-10198 | NS_000200.1 | + | 146653652 | 146653701 |
| Sma-1-10199 | NS_000200.1 | + | 148269797 | 148269846 |
| Sma-1-10200 | NS_000200.1 | + | 149530763 | 149530812 |
| Sma-1-10201 | NS_000200.1 | + | 149531163 | 149531212 |
| Sma-1-10202 | NS_000200.1 | + | 149536004 | 149536053 |
| Sma-1-10203 | NS_000200.1 | + | 151749567 | 151749616 |
| Sma-1-10204 | NS_000200.1 | + | 152205929 | 152205978 |
| Sma-1-10205 | NS_000200.1 | + | 153809178 | 153809227 |
| Sma-1-10206 | NS_000200.1 | + | 154176571 | 154176620 |
| Sma-1-10207 | NS_000200.1 | + | 156739997 | 156740046 |
| Sma-1-10208 | NS_000200.1 | + | 157195557 | 157195606 |
| Sma-1-10209 | NS_000200.1 | + | 158969157 | 158969206 |
| Sma-1-10210 | NS_000200.1 | + | 163351564 | 163351613 |
| Sma-1-10211 | NS_000200.1 | + | 163471601 | 163471650 |
| Sma-1-10212 | NS_000200.1 | + | 166153354 | 166153403 |
| Sma-1-10213 | NS_000200.1 | + | 167359739 | 167359788 |
| Sma-1-10214 | NS_000200.1 | + | 168223384 | 168223433 |
| Sma-1-10215 | NS_000200.1 | + | 169372922 | 169372971 |
| Sma-1-10216 | NS_000200.1 | + | 170140249 | 170140298 |
| Sma-1-10217 | NS_000200.1 | + | 172045779 | 172045828 |
| Sma-1-10218 | NS_000200.1 | + | 172640507 | 172640556 |
| Sma-1-10219 | NS_000200.1 | + | 174494342 | 174494391 |
| Sma-1-10220 | NS_000200.1 | + | 175088706 | 175088755 |
| Sma-1-10221 | NS_000200.1 | + | 175528234 | 175528283 |
| Sma-1-10222 | NS_000200.1 | + | 178149232 | 178149281 |
| Sma-1-10223 | NS_000200.1 | + | 178717927 | 178717976 |
| Sma-1-10224 | NS_000200.1 | + | 178762152 | 178762201 |
| Sma-1-10225 | NS_000200.1 | + | 181507797 | 181507846 |
| Sma-1-10226 | NS_000200.1 | + | 182225791 | 182225840 |
| Sma-1-10227 | NS_000200.1 | + | 182386552 | 182386601 |
| Sma-1-10228 | NS_000200.1 | + | 182791220 | 182791269 |
| Sma-1-10229 | NS_000200.1 | + | 183466270 | 183466319 |
| Sma-1-10230 | NS_000200.1 | + | 188110503 | 188110552 |
| Sma-1-10231 | NS_000200.1 | + | 190973869 | 190973918 |
| Sma-1-10232 | NS_000200.1 | + | 191574466 | 191574515 |
| Sma-1-10233 | NS_000200.1 | + | 193081460 | 193081509 |
| Sma-1-10234 | NS_000200.1 | + | 195446455 | 195446504 |
| Sma-1-10235 | NS_000200.1 | + | 195965811 | 195965860 |
| Sma-1-10236 | NS_000200.1 | + | 197163209 | 197163258 |
| Sma-1-10237 | NS_000200.1 | + | 199043778 | 199043827 |
| Sma-1-10238 | NS_000200.1 | + | 199085986 | 199086035 |
| Sma-1-10239 | NS_000200.1 | + | 199329483 | 199329532 |
| Sma-1-10240 | NS_000200.1 | + | 201245091 | 201245140 |
| Sma-1-10241 | NS_000200.1 | + | 202781628 | 202781677 |
| Sma-1-10242 | NS_000200.1 | + | 202936474 | 202936523 |
| Sma-1-10243 | NS_000200.1 | + | 207719693 | 207719742 |
| Sma-1-10244 | NS_000200.1 | + | 207727790 | 207727839 |
| Sma-1-10245 | NS_000200.1 | + | 210318968 | 210319017 |
| Sma-1-10246 | NS_000200.1 | + | 212221742 | 212221791 |
| Sma-1-10247 | NS_000200.1 | + | 212927170 | 212927219 |
| Sma-1-10248 | NS_000200.1 | + | 213236357 | 213236406 |

|             |             |   |           |           |
|-------------|-------------|---|-----------|-----------|
| Sma-1-10249 | NS_000200.1 | + | 213255117 | 213255166 |
| Sma-1-10250 | NS_000200.1 | + | 217645623 | 217645672 |
| Sma-1-10251 | NS_000200.1 | + | 218265984 | 218266033 |
| Sma-1-10252 | NS_000200.1 | + | 218795152 | 218795201 |
| Sma-1-10253 | NS_000200.1 | + | 219239904 | 219239953 |
| Sma-1-10254 | NS_000200.1 | + | 221263346 | 221263395 |
| Sma-1-10255 | NS_000200.1 | + | 222716876 | 222716925 |
| Sma-1-10256 | NS_000200.1 | + | 222739737 | 222739786 |
| Sma-1-10257 | NS_000200.1 | + | 222814364 | 222814413 |
| Sma-1-10258 | NS_000200.1 | + | 224800535 | 224800584 |
| Sma-1-10259 | NS_000200.1 | + | 225804528 | 225804577 |
| Sma-1-10260 | NS_000200.1 | + | 226021246 | 226021295 |
| Sma-1-10261 | NS_000200.1 | + | 226442276 | 226442325 |
| Sma-1-10262 | NS_000200.1 | + | 227259438 | 227259487 |
| Sma-1-10263 | NS_000200.1 | + | 230227550 | 230227599 |
| Sma-1-10264 | NS_000200.1 | + | 232418691 | 232418740 |
| Sma-1-10265 | NS_000200.1 | + | 232769380 | 232769429 |
| Sma-1-10266 | NS_000200.1 | + | 234492033 | 234492082 |
| Sma-1-10267 | NS_000200.1 | + | 236541272 | 236541321 |
| Sma-1-10268 | NS_000200.1 | + | 236732826 | 236732875 |
| Sma-1-10269 | NS_000200.1 | + | 237778120 | 237778169 |
| Sma-1-10270 | NS_000200.1 | + | 241033175 | 241033224 |
| Sma-1-10271 | NS_000200.1 | + | 241960871 | 241960920 |
| Sma-1-10272 | NS_000200.1 | + | 242063263 | 242063312 |
| Sma-1-10273 | NS_000200.1 | + | 244636750 | 244636799 |
| Sma-1-10274 | NS_000200.1 | + | 248938473 | 248938522 |
| Sma-1-10275 | NS_000200.1 | + | 249204988 | 249205037 |
| Sma-1-10276 | NS_000200.1 | + | 253284167 | 253284216 |
| Sma-1-10277 | NS_000200.1 | + | 253751728 | 253751777 |
| Sma-1-10278 | NS_000200.1 | + | 254760948 | 254760997 |
| Sma-1-10279 | NS_000200.1 | + | 255237953 | 255238002 |
| Sma-1-10280 | NS_000200.1 | + | 258738202 | 258738251 |
| Sma-1-10281 | NS_000200.1 | + | 267189061 | 267189110 |
| Sma-1-10282 | NS_000200.1 | + | 269002721 | 269002770 |
| Sma-1-10283 | NS_000200.1 | + | 269233858 | 269233907 |
| Sma-1-10284 | NS_000200.1 | + | 269774457 | 269774506 |
| Sma-1-10285 | NS_000200.1 | + | 270216504 | 270216553 |
| Sma-1-10286 | NS_000200.1 | + | 271166544 | 271166593 |
| Sma-1-10287 | NS_000200.1 | + | 272615097 | 272615146 |
| Sma-1-10288 | NS_000200.1 | + | 275141607 | 275141656 |
| Sma-1-10289 | NS_000200.1 | + | 275474481 | 275474530 |
| Sma-1-10290 | NS_000200.1 | + | 275541590 | 275541639 |
| Sma-1-10291 | NS_000200.1 | + | 276284818 | 276284867 |
| Sma-1-10292 | NS_000200.1 | + | 276618295 | 276618344 |
| Sma-1-10293 | NS_000200.1 | + | 280145993 | 280146042 |
| Sma-1-10294 | NS_000200.1 | + | 280146393 | 280146442 |
| Sma-1-10295 | NS_000200.1 | + | 280146793 | 280146842 |
| Sma-1-10296 | NS_000200.1 | + | 280169601 | 280169650 |
| Sma-1-10297 | NS_000200.1 | + | 280488164 | 280488213 |
| Sma-1-10298 | NS_000200.1 | + | 281253434 | 281253483 |
| Sma-1-10299 | NS_000200.1 | + | 281290129 | 281290178 |
| Sma-1-10300 | NS_000200.1 | + | 282015172 | 282015221 |

|             |             |   |           |           |
|-------------|-------------|---|-----------|-----------|
| Sma-1-10301 | NS_000200.1 | + | 282604856 | 282604905 |
| Sma-1-10302 | NS_000200.1 | + | 284142002 | 284142051 |
| Sma-1-10303 | NS_000200.1 | + | 284191412 | 284191461 |
| Sma-1-10304 | NS_000200.1 | + | 289887455 | 289887504 |
| Sma-1-10305 | NS_000200.1 | + | 290720036 | 290720085 |
| Sma-1-10306 | NS_000200.1 | + | 294457516 | 294457565 |
| Sma-1-10307 | NS_000200.1 | + | 294624832 | 294624881 |
| Sma-1-10308 | NS_000200.1 | + | 295501012 | 295501061 |
| Sma-1-10309 | NS_000200.1 | + | 298461282 | 298461331 |
| Sma-1-10310 | NS_000200.1 | + | 298461681 | 298461730 |
| Sma-1-10311 | NS_000200.1 | + | 299387198 | 299387247 |
| Sma-1-10312 | NS_000200.1 | + | 300522845 | 300522894 |
| Sma-1-10313 | NS_000200.1 | + | 301289215 | 301289264 |
| Sma-1-10314 | NS_000200.1 | + | 301587335 | 301587384 |
| Sma-1-10315 | NS_000200.1 | + | 303233975 | 303234024 |
| Sma-1-10316 | NS_000200.1 | + | 307401281 | 307401330 |
| Sma-1-10317 | NS_000200.1 | + | 307420998 | 307421047 |
| Sma-1-10318 | NS_000200.1 | + | 311286977 | 311287026 |
| Sma-1-10319 | NS_000200.1 | + | 311610997 | 311611046 |
| Sma-1-10320 | NS_000200.1 | + | 313155411 | 313155460 |
| Sma-1-10321 | NS_000200.1 | + | 313718602 | 313718651 |
| Sma-1-10322 | NS_000200.1 | + | 316310158 | 316310207 |
| Sma-1-10323 | NS_000200.1 | + | 319380389 | 319380438 |
| Sma-1-10324 | NS_000200.1 | + | 319619536 | 319619585 |
| Sma-1-10325 | NS_000200.1 | + | 321492433 | 321492482 |
| Sma-1-10326 | NS_000200.1 | + | 321933632 | 321933681 |
| Sma-1-10327 | NS_000200.1 | + | 321978779 | 321978828 |
| Sma-1-10328 | NS_000200.1 | + | 322326362 | 322326411 |
| Sma-1-10329 | NS_000200.1 | + | 322539951 | 322540000 |
| Sma-1-10330 | NS_000200.1 | + | 323630360 | 323630409 |
| Sma-1-10331 | NS_000200.1 | + | 324628130 | 324628179 |
| Sma-1-10332 | NS_000200.1 | + | 324762770 | 324762819 |
| Sma-1-10333 | NS_000200.1 | + | 325164296 | 325164345 |
| Sma-1-10334 | NS_000200.1 | + | 325466291 | 325466340 |
| Sma-1-10335 | NS_000200.1 | + | 325543095 | 325543144 |
| Sma-1-10336 | NS_000200.1 | + | 326130321 | 326130370 |
| Sma-1-10337 | NS_000200.1 | + | 329521131 | 329521180 |
| Sma-1-10338 | NS_000200.1 | + | 330002388 | 330002437 |
| Sma-1-10339 | NS_000200.1 | + | 330243026 | 330243075 |
| Sma-1-10340 | NS_000200.1 | + | 332204613 | 332204662 |
| Sma-1-10341 | NS_000200.1 | + | 335730191 | 335730240 |
| Sma-1-10342 | NS_000200.1 | + | 335879587 | 335879636 |
| Sma-1-10343 | NS_000200.1 | + | 339152906 | 339152955 |
| Sma-1-10344 | NS_000200.1 | + | 344794366 | 344794415 |
| Sma-1-10345 | NS_000200.1 | + | 347416423 | 347416472 |
| Sma-1-10346 | NS_000200.1 | + | 348038190 | 348038239 |
| Sma-1-10347 | NS_000200.1 | + | 348979309 | 348979358 |
| Sma-1-10348 | NS_000200.1 | + | 355480024 | 355480073 |
| Sma-1-10349 | NS_000200.1 | + | 355481077 | 355481126 |
| Sma-1-10350 | NS_000200.1 | + | 355501481 | 355501530 |
| Sma-1-10351 | NS_000200.1 | + | 357196183 | 357196232 |
| Sma-1-10352 | NS_000200.1 | + | 357732341 | 357732390 |

|             |             |   |           |           |
|-------------|-------------|---|-----------|-----------|
| Sma-1-10353 | NS_000200.1 | + | 359474722 | 359474771 |
| Sma-1-10354 | NS_000200.1 | + | 363553852 | 363553901 |
| Sma-1-10355 | NS_000200.1 | + | 363883674 | 363883723 |
| Sma-1-10356 | NS_000200.1 | + | 364455488 | 364455537 |
| Sma-1-10357 | NS_000200.1 | + | 365610492 | 365610541 |
| Sma-1-10358 | NS_000200.1 | + | 367406513 | 367406562 |
| Sma-1-10359 | NS_000200.1 | + | 367429947 | 367429996 |
| Sma-1-10360 | NS_000200.1 | + | 370777071 | 370777120 |
| Sma-1-10361 | NS_000200.1 | + | 371150853 | 371150902 |
| Sma-1-10362 | NS_000200.1 | + | 371273888 | 371273937 |
| Sma-1-10363 | NS_000200.1 | + | 371755824 | 371755873 |
| Sma-1-10364 | NS_000200.1 | + | 376154858 | 376154907 |
| Sma-1-10365 | NS_000200.1 | + | 378343973 | 378344022 |
| Sma-1-10366 | NS_000200.1 | + | 378611470 | 378611519 |
| Sma-1-10367 | NS_000200.1 | + | 381661311 | 381661360 |
| Sma-1-10368 | NS_000200.1 | - | 380761919 | 380761870 |
| Sma-1-10369 | NS_000200.1 | - | 378608121 | 378608072 |
| Sma-1-10370 | NS_000200.1 | - | 373488557 | 373488508 |
| Sma-1-10371 | NS_000200.1 | - | 370823518 | 370823469 |
| Sma-1-10372 | NS_000200.1 | - | 370823112 | 370823063 |
| Sma-1-10373 | NS_000200.1 | - | 370807200 | 370807151 |
| Sma-1-10374 | NS_000200.1 | - | 370687465 | 370687416 |
| Sma-1-10375 | NS_000200.1 | - | 369720680 | 369720631 |
| Sma-1-10376 | NS_000200.1 | - | 365180225 | 365180176 |
| Sma-1-10377 | NS_000200.1 | - | 365102050 | 365102001 |
| Sma-1-10378 | NS_000200.1 | - | 364913478 | 364913429 |
| Sma-1-10379 | NS_000200.1 | - | 363921150 | 363921101 |
| Sma-1-10380 | NS_000200.1 | - | 363660850 | 363660801 |
| Sma-1-10381 | NS_000200.1 | - | 360445888 | 360445839 |
| Sma-1-10382 | NS_000200.1 | - | 358796742 | 358796693 |
| Sma-1-10383 | NS_000200.1 | - | 357609130 | 357609081 |
| Sma-1-10384 | NS_000200.1 | - | 356781117 | 356781068 |
| Sma-1-10385 | NS_000200.1 | - | 356319697 | 356319648 |
| Sma-1-10386 | NS_000200.1 | - | 356127395 | 356127346 |
| Sma-1-10387 | NS_000200.1 | - | 356126993 | 356126944 |
| Sma-1-10388 | NS_000200.1 | - | 352328801 | 352328752 |
| Sma-1-10389 | NS_000200.1 | - | 352328403 | 352328354 |
| Sma-1-10390 | NS_000200.1 | - | 352328005 | 352327956 |
| Sma-1-10391 | NS_000200.1 | - | 351954041 | 351953992 |
| Sma-1-10392 | NS_000200.1 | - | 351953643 | 351953594 |
| Sma-1-10393 | NS_000200.1 | - | 347650336 | 347650287 |
| Sma-1-10394 | NS_000200.1 | - | 347222552 | 347222503 |
| Sma-1-10395 | NS_000200.1 | - | 346092357 | 346092308 |
| Sma-1-10396 | NS_000200.1 | - | 346091956 | 346091907 |
| Sma-1-10397 | NS_000200.1 | - | 345067896 | 345067847 |
| Sma-1-10398 | NS_000200.1 | - | 344691450 | 344691401 |
| Sma-1-10399 | NS_000200.1 | - | 339266315 | 339266266 |
| Sma-1-10400 | NS_000200.1 | - | 338363998 | 338363949 |
| Sma-1-10401 | NS_000200.1 | - | 335412271 | 335412222 |
| Sma-1-10402 | NS_000200.1 | - | 334145138 | 334145089 |
| Sma-1-10403 | NS_000200.1 | - | 332204182 | 332204133 |
| Sma-1-10404 | NS_000200.1 | - | 332202340 | 332202291 |

|             |             |   |           |           |
|-------------|-------------|---|-----------|-----------|
| Sma-1-10405 | NS_000200.1 | - | 331109233 | 331109184 |
| Sma-1-10406 | NS_000200.1 | - | 329429104 | 329429055 |
| Sma-1-10407 | NS_000200.1 | - | 327918450 | 327918401 |
| Sma-1-10408 | NS_000200.1 | - | 327831974 | 327831925 |
| Sma-1-10409 | NS_000200.1 | - | 327473086 | 327473037 |
| Sma-1-10410 | NS_000200.1 | - | 326259946 | 326259897 |
| Sma-1-10411 | NS_000200.1 | - | 324720606 | 324720557 |
| Sma-1-10412 | NS_000200.1 | - | 324094738 | 324094689 |
| Sma-1-10413 | NS_000200.1 | - | 323493120 | 323493071 |
| Sma-1-10414 | NS_000200.1 | - | 321733454 | 321733405 |
| Sma-1-10415 | NS_000200.1 | - | 320040459 | 320040410 |
| Sma-1-10416 | NS_000200.1 | - | 318567898 | 318567849 |
| Sma-1-10417 | NS_000200.1 | - | 318567495 | 318567446 |
| Sma-1-10418 | NS_000200.1 | - | 318147878 | 318147829 |
| Sma-1-10419 | NS_000200.1 | - | 316288510 | 316288461 |
| Sma-1-10420 | NS_000200.1 | - | 315478467 | 315478418 |
| Sma-1-10421 | NS_000200.1 | - | 315322093 | 315322044 |
| Sma-1-10422 | NS_000200.1 | - | 314225291 | 314225242 |
| Sma-1-10423 | NS_000200.1 | - | 314056870 | 314056821 |
| Sma-1-10424 | NS_000200.1 | - | 313875382 | 313875333 |
| Sma-1-10425 | NS_000200.1 | - | 313554382 | 313554333 |
| Sma-1-10426 | NS_000200.1 | - | 312604300 | 312604251 |
| Sma-1-10427 | NS_000200.1 | - | 312512466 | 312512417 |
| Sma-1-10428 | NS_000200.1 | - | 311567880 | 311567831 |
| Sma-1-10429 | NS_000200.1 | - | 311564222 | 311564173 |
| Sma-1-10430 | NS_000200.1 | - | 310673585 | 310673536 |
| Sma-1-10431 | NS_000200.1 | - | 305422841 | 305422792 |
| Sma-1-10432 | NS_000200.1 | - | 300535819 | 300535770 |
| Sma-1-10433 | NS_000200.1 | - | 300330132 | 300330083 |
| Sma-1-10434 | NS_000200.1 | - | 298867349 | 298867300 |
| Sma-1-10435 | NS_000200.1 | - | 292077184 | 292077135 |
| Sma-1-10436 | NS_000200.1 | - | 286017029 | 286016980 |
| Sma-1-10437 | NS_000200.1 | - | 282680131 | 282680082 |
| Sma-1-10438 | NS_000200.1 | - | 282336015 | 282335966 |
| Sma-1-10439 | NS_000200.1 | - | 282306575 | 282306526 |
| Sma-1-10440 | NS_000200.1 | - | 281870242 | 281870193 |
| Sma-1-10441 | NS_000200.1 | - | 280145595 | 280145546 |
| Sma-1-10442 | NS_000200.1 | - | 280145195 | 280145146 |
| Sma-1-10443 | NS_000200.1 | - | 278128632 | 278128583 |
| Sma-1-10444 | NS_000200.1 | - | 278082840 | 278082791 |
| Sma-1-10445 | NS_000200.1 | - | 276865108 | 276865059 |
| Sma-1-10446 | NS_000200.1 | - | 276284570 | 276284521 |
| Sma-1-10447 | NS_000200.1 | - | 275141422 | 275141373 |
| Sma-1-10448 | NS_000200.1 | - | 272412708 | 272412659 |
| Sma-1-10449 | NS_000200.1 | - | 271166256 | 271166207 |
| Sma-1-10450 | NS_000200.1 | - | 270215902 | 270215853 |
| Sma-1-10451 | NS_000200.1 | - | 269541836 | 269541787 |
| Sma-1-10452 | NS_000200.1 | - | 268056804 | 268056755 |
| Sma-1-10453 | NS_000200.1 | - | 267040103 | 267040054 |
| Sma-1-10454 | NS_000200.1 | - | 265362373 | 265362324 |
| Sma-1-10455 | NS_000200.1 | - | 264619180 | 264619131 |
| Sma-1-10456 | NS_000200.1 | - | 260545823 | 260545774 |

|             |             |   |           |           |
|-------------|-------------|---|-----------|-----------|
| Sma-1-10457 | NS_000200.1 | - | 259391724 | 259391675 |
| Sma-1-10458 | NS_000200.1 | - | 257704868 | 257704819 |
| Sma-1-10459 | NS_000200.1 | - | 256783179 | 256783130 |
| Sma-1-10460 | NS_000200.1 | - | 256651499 | 256651450 |
| Sma-1-10461 | NS_000200.1 | - | 256511807 | 256511758 |
| Sma-1-10462 | NS_000200.1 | - | 256340786 | 256340737 |
| Sma-1-10463 | NS_000200.1 | - | 254024882 | 254024833 |
| Sma-1-10464 | NS_000200.1 | - | 253322956 | 253322907 |
| Sma-1-10465 | NS_000200.1 | - | 252426520 | 252426471 |
| Sma-1-10466 | NS_000200.1 | - | 251784528 | 251784479 |
| Sma-1-10467 | NS_000200.1 | - | 250997691 | 250997642 |
| Sma-1-10468 | NS_000200.1 | - | 250851386 | 250851337 |
| Sma-1-10469 | NS_000200.1 | - | 248914006 | 248913957 |
| Sma-1-10470 | NS_000200.1 | - | 248894729 | 248894680 |
| Sma-1-10471 | NS_000200.1 | - | 246179152 | 246179103 |
| Sma-1-10472 | NS_000200.1 | - | 246030041 | 246029992 |
| Sma-1-10473 | NS_000200.1 | - | 245683482 | 245683433 |
| Sma-1-10474 | NS_000200.1 | - | 245141430 | 245141381 |
| Sma-1-10475 | NS_000200.1 | - | 240644290 | 240644241 |
| Sma-1-10476 | NS_000200.1 | - | 236653678 | 236653629 |
| Sma-1-10477 | NS_000200.1 | - | 236564529 | 236564480 |
| Sma-1-10478 | NS_000200.1 | - | 234491878 | 234491829 |
| Sma-1-10479 | NS_000200.1 | - | 233691706 | 233691657 |
| Sma-1-10480 | NS_000200.1 | - | 233249613 | 233249564 |
| Sma-1-10481 | NS_000200.1 | - | 232949927 | 232949878 |
| Sma-1-10482 | NS_000200.1 | - | 230738387 | 230738338 |
| Sma-1-10483 | NS_000200.1 | - | 222339094 | 222339045 |
| Sma-1-10484 | NS_000200.1 | - | 222046976 | 222046927 |
| Sma-1-10485 | NS_000200.1 | - | 221245261 | 221245212 |
| Sma-1-10486 | NS_000200.1 | - | 220954796 | 220954747 |
| Sma-1-10487 | NS_000200.1 | - | 220080336 | 220080287 |
| Sma-1-10488 | NS_000200.1 | - | 219959725 | 219959676 |
| Sma-1-10489 | NS_000200.1 | - | 219738205 | 219738156 |
| Sma-1-10490 | NS_000200.1 | - | 219436462 | 219436413 |
| Sma-1-10491 | NS_000200.1 | - | 219248845 | 219248796 |
| Sma-1-10492 | NS_000200.1 | - | 218816606 | 218816557 |
| Sma-1-10493 | NS_000200.1 | - | 217645214 | 217645165 |
| Sma-1-10494 | NS_000200.1 | - | 213576679 | 213576630 |
| Sma-1-10495 | NS_000200.1 | - | 213023192 | 213023143 |
| Sma-1-10496 | NS_000200.1 | - | 212909360 | 212909311 |
| Sma-1-10497 | NS_000200.1 | - | 212895304 | 212895255 |
| Sma-1-10498 | NS_000200.1 | - | 212842523 | 212842474 |
| Sma-1-10499 | NS_000200.1 | - | 212484641 | 212484592 |
| Sma-1-10500 | NS_000200.1 | - | 212127017 | 212126968 |
| Sma-1-10501 | NS_000200.1 | - | 210318670 | 210318621 |
| Sma-1-10502 | NS_000200.1 | - | 209225452 | 209225403 |
| Sma-1-10503 | NS_000200.1 | - | 208624602 | 208624553 |
| Sma-1-10504 | NS_000200.1 | - | 207727389 | 207727340 |
| Sma-1-10505 | NS_000200.1 | - | 206163094 | 206163045 |
| Sma-1-10506 | NS_000200.1 | - | 205185346 | 205185297 |
| Sma-1-10507 | NS_000200.1 | - | 204415510 | 204415461 |
| Sma-1-10508 | NS_000200.1 | - | 204178974 | 204178925 |



|             |             |   |           |           |
|-------------|-------------|---|-----------|-----------|
| Sma-1-10509 | NS_000200.1 | - | 203972490 | 203972441 |
| Sma-1-10510 | NS_000200.1 | - | 203055573 | 203055524 |
| Sma-1-10511 | NS_000200.1 | - | 202935576 | 202935527 |
| Sma-1-10512 | NS_000200.1 | - | 202781271 | 202781222 |
| Sma-1-10513 | NS_000200.1 | - | 202778545 | 202778496 |
| Sma-1-10514 | NS_000200.1 | - | 198786857 | 198786808 |
| Sma-1-10515 | NS_000200.1 | - | 198431453 | 198431404 |
| Sma-1-10516 | NS_000200.1 | - | 197985459 | 197985410 |
| Sma-1-10517 | NS_000200.1 | - | 197508539 | 197508490 |
| Sma-1-10518 | NS_000200.1 | - | 197462637 | 197462588 |
| Sma-1-10519 | NS_000200.1 | - | 193504901 | 193504852 |
| Sma-1-10520 | NS_000200.1 | - | 192627718 | 192627669 |
| Sma-1-10521 | NS_000200.1 | - | 192193650 | 192193601 |
| Sma-1-10522 | NS_000200.1 | - | 189547043 | 189546994 |
| Sma-1-10523 | NS_000200.1 | - | 189476260 | 189476211 |
| Sma-1-10524 | NS_000200.1 | - | 188748714 | 188748665 |
| Sma-1-10525 | NS_000200.1 | - | 188098722 | 188098673 |
| Sma-1-10526 | NS_000200.1 | - | 187494835 | 187494786 |
| Sma-1-10527 | NS_000200.1 | - | 187306827 | 187306778 |
| Sma-1-10528 | NS_000200.1 | - | 184210379 | 184210330 |
| Sma-1-10529 | NS_000200.1 | - | 184125258 | 184125209 |
| Sma-1-10530 | NS_000200.1 | - | 183098186 | 183098137 |
| Sma-1-10531 | NS_000200.1 | - | 182591372 | 182591323 |
| Sma-1-10532 | NS_000200.1 | - | 182223871 | 182223822 |
| Sma-1-10533 | NS_000200.1 | - | 180679426 | 180679377 |
| Sma-1-10534 | NS_000200.1 | - | 180016900 | 180016851 |
| Sma-1-10535 | NS_000200.1 | - | 179704257 | 179704208 |
| Sma-1-10536 | NS_000200.1 | - | 179143123 | 179143074 |
| Sma-1-10537 | NS_000200.1 | - | 179122598 | 179122549 |
| Sma-1-10538 | NS_000200.1 | - | 178352310 | 178352261 |
| Sma-1-10539 | NS_000200.1 | - | 177430135 | 177430086 |
| Sma-1-10540 | NS_000200.1 | - | 176065191 | 176065142 |
| Sma-1-10541 | NS_000200.1 | - | 175315931 | 175315882 |
| Sma-1-10542 | NS_000200.1 | - | 174369233 | 174369184 |
| Sma-1-10543 | NS_000200.1 | - | 169634044 | 169633995 |
| Sma-1-10544 | NS_000200.1 | - | 169579187 | 169579138 |
| Sma-1-10545 | NS_000200.1 | - | 169372678 | 169372629 |
| Sma-1-10546 | NS_000200.1 | - | 168530738 | 168530689 |
| Sma-1-10547 | NS_000200.1 | - | 168510963 | 168510914 |
| Sma-1-10548 | NS_000200.1 | - | 168413394 | 168413345 |
| Sma-1-10549 | NS_000200.1 | - | 167582386 | 167582337 |
| Sma-1-10550 | NS_000200.1 | - | 166649657 | 166649608 |
| Sma-1-10551 | NS_000200.1 | - | 164660192 | 164660143 |
| Sma-1-10552 | NS_000200.1 | - | 163886234 | 163886185 |
| Sma-1-10553 | NS_000200.1 | - | 163564424 | 163564375 |
| Sma-1-10554 | NS_000200.1 | - | 157194529 | 157194480 |
| Sma-1-10555 | NS_000200.1 | - | 156619578 | 156619529 |
| Sma-1-10556 | NS_000200.1 | - | 156391780 | 156391731 |
| Sma-1-10557 | NS_000200.1 | - | 155984666 | 155984617 |
| Sma-1-10558 | NS_000200.1 | - | 155984265 | 155984216 |
| Sma-1-10559 | NS_000200.1 | - | 153814321 | 153814272 |
| Sma-1-10560 | NS_000200.1 | - | 153179368 | 153179319 |

|             |             |   |           |           |
|-------------|-------------|---|-----------|-----------|
| Sma-1-10561 | NS_000200.1 | - | 149530483 | 149530434 |
| Sma-1-10562 | NS_000200.1 | - | 149060460 | 149060411 |
| Sma-1-10563 | NS_000200.1 | - | 148269399 | 148269350 |
| Sma-1-10564 | NS_000200.1 | - | 144588572 | 144588523 |
| Sma-1-10565 | NS_000200.1 | - | 144371794 | 144371745 |
| Sma-1-10566 | NS_000200.1 | - | 140805402 | 140805353 |
| Sma-1-10567 | NS_000200.1 | - | 139893806 | 139893757 |
| Sma-1-10568 | NS_000200.1 | - | 139150623 | 139150574 |
| Sma-1-10569 | NS_000200.1 | - | 138149369 | 138149320 |
| Sma-1-10570 | NS_000200.1 | - | 135748322 | 135748273 |
| Sma-1-10571 | NS_000200.1 | - | 134142076 | 134142027 |
| Sma-1-10572 | NS_000200.1 | - | 133198841 | 133198792 |
| Sma-1-10573 | NS_000200.1 | - | 132466614 | 132466565 |
| Sma-1-10574 | NS_000200.1 | - | 130057593 | 130057544 |
| Sma-1-10575 | NS_000200.1 | - | 128391971 | 128391922 |
| Sma-1-10576 | NS_000200.1 | - | 126782523 | 126782474 |
| Sma-1-10577 | NS_000200.1 | - | 125527797 | 125527748 |
| Sma-1-10578 | NS_000200.1 | - | 125425029 | 125424980 |
| Sma-1-10579 | NS_000200.1 | - | 122504072 | 122504023 |
| Sma-1-10580 | NS_000200.1 | - | 120661150 | 120661101 |
| Sma-1-10581 | NS_000200.1 | - | 120195579 | 120195530 |
| Sma-1-10582 | NS_000200.1 | - | 116585537 | 116585488 |
| Sma-1-10583 | NS_000200.1 | - | 113978815 | 113978766 |
| Sma-1-10584 | NS_000200.1 | - | 113593123 | 113593074 |
| Sma-1-10585 | NS_000200.1 | - | 113592722 | 113592673 |
| Sma-1-10586 | NS_000200.1 | - | 113340451 | 113340402 |
| Sma-1-10587 | NS_000200.1 | - | 112860243 | 112860194 |
| Sma-1-10588 | NS_000200.1 | - | 112738040 | 112737991 |
| Sma-1-10589 | NS_000200.1 | - | 112708730 | 112708681 |
| Sma-1-10590 | NS_000200.1 | - | 112355049 | 112355000 |
| Sma-1-10591 | NS_000200.1 | - | 110228721 | 110228672 |
| Sma-1-10592 | NS_000200.1 | - | 107259881 | 107259832 |
| Sma-1-10593 | NS_000200.1 | - | 106619011 | 106618962 |
| Sma-1-10594 | NS_000200.1 | - | 104940286 | 104940237 |
| Sma-1-10595 | NS_000200.1 | - | 104158524 | 104158475 |
| Sma-1-10596 | NS_000200.1 | - | 103466499 | 103466450 |
| Sma-1-10597 | NS_000200.1 | - | 101560735 | 101560686 |
| Sma-1-10598 | NS_000200.1 | - | 95824518  | 95824469  |
| Sma-1-10599 | NS_000200.1 | - | 91218071  | 91218022  |
| Sma-1-10600 | NS_000200.1 | - | 90097331  | 90097282  |
| Sma-1-10601 | NS_000200.1 | - | 89330567  | 89330518  |
| Sma-1-10602 | NS_000200.1 | - | 89094435  | 89094386  |
| Sma-1-10603 | NS_000200.1 | - | 87709813  | 87709764  |
| Sma-1-10604 | NS_000200.1 | - | 87709412  | 87709363  |
| Sma-1-10605 | NS_000200.1 | - | 87709011  | 87708962  |
| Sma-1-10606 | NS_000200.1 | - | 87697157  | 87697108  |
| Sma-1-10607 | NS_000200.1 | - | 87346157  | 87346108  |
| Sma-1-10608 | NS_000200.1 | - | 85164379  | 85164330  |
| Sma-1-10609 | NS_000200.1 | - | 83710603  | 83710554  |
| Sma-1-10610 | NS_000200.1 | - | 83091685  | 83091636  |
| Sma-1-10611 | NS_000200.1 | - | 81400590  | 81400541  |
| Sma-1-10612 | NS_000200.1 | - | 80590562  | 80590513  |

|             |             |   |          |          |
|-------------|-------------|---|----------|----------|
| Sma-1-10613 | NS_000200.1 | - | 80131433 | 80131384 |
| Sma-1-10614 | NS_000200.1 | - | 79724648 | 79724599 |
| Sma-1-10615 | NS_000200.1 | - | 77397725 | 77397676 |
| Sma-1-10616 | NS_000200.1 | - | 75173633 | 75173584 |
| Sma-1-10617 | NS_000200.1 | - | 71329763 | 71329714 |
| Sma-1-10618 | NS_000200.1 | - | 71161626 | 71161577 |
| Sma-1-10619 | NS_000200.1 | - | 70609058 | 70609009 |
| Sma-1-10620 | NS_000200.1 | - | 69227784 | 69227735 |
| Sma-1-10621 | NS_000200.1 | - | 68158175 | 68158126 |
| Sma-1-10622 | NS_000200.1 | - | 67585743 | 67585694 |
| Sma-1-10623 | NS_000200.1 | - | 63173810 | 63173761 |
| Sma-1-10624 | NS_000200.1 | - | 63048531 | 63048482 |
| Sma-1-10625 | NS_000200.1 | - | 62125614 | 62125565 |
| Sma-1-10626 | NS_000200.1 | - | 60959878 | 60959829 |
| Sma-1-10627 | NS_000200.1 | - | 60072669 | 60072620 |
| Sma-1-10628 | NS_000200.1 | - | 59536943 | 59536894 |
| Sma-1-10629 | NS_000200.1 | - | 57446530 | 57446481 |
| Sma-1-10630 | NS_000200.1 | - | 55759610 | 55759561 |
| Sma-1-10631 | NS_000200.1 | - | 54689909 | 54689860 |
| Sma-1-10632 | NS_000200.1 | - | 54686193 | 54686144 |
| Sma-1-10633 | NS_000200.1 | - | 53922276 | 53922227 |
| Sma-1-10634 | NS_000200.1 | - | 53026318 | 53026269 |
| Sma-1-10635 | NS_000200.1 | - | 49946226 | 49946177 |
| Sma-1-10636 | NS_000200.1 | - | 47644346 | 47644297 |
| Sma-1-10637 | NS_000200.1 | - | 46827469 | 46827420 |
| Sma-1-10638 | NS_000200.1 | - | 46652978 | 46652929 |
| Sma-1-10639 | NS_000200.1 | - | 44304499 | 44304450 |
| Sma-1-10640 | NS_000200.1 | - | 41054793 | 41054744 |
| Sma-1-10641 | NS_000200.1 | - | 36897442 | 36897393 |
| Sma-1-10642 | NS_000200.1 | - | 35659229 | 35659180 |
| Sma-1-10643 | NS_000200.1 | - | 35180520 | 35180471 |
| Sma-1-10644 | NS_000200.1 | - | 34177486 | 34177437 |
| Sma-1-10645 | NS_000200.1 | - | 33730227 | 33730178 |
| Sma-1-10646 | NS_000200.1 | - | 32532200 | 32532151 |
| Sma-1-10647 | NS_000200.1 | - | 32036001 | 32035952 |
| Sma-1-10648 | NS_000200.1 | - | 31812848 | 31812799 |
| Sma-1-10649 | NS_000200.1 | - | 25517365 | 25517316 |
| Sma-1-10650 | NS_000200.1 | - | 24318281 | 24318232 |
| Sma-1-10651 | NS_000200.1 | - | 23686957 | 23686908 |
| Sma-1-10652 | NS_000200.1 | - | 21897581 | 21897532 |
| Sma-1-10653 | NS_000200.1 | - | 20564032 | 20563983 |
| Sma-1-10654 | NS_000200.1 | - | 19386074 | 19386025 |
| Sma-1-10655 | NS_000200.1 | - | 18403803 | 18403754 |
| Sma-1-10656 | NS_000200.1 | - | 18131543 | 18131494 |
| Sma-1-10657 | NS_000200.1 | - | 16296275 | 16296226 |
| Sma-1-10658 | NS_000200.1 | - | 14992319 | 14992270 |
| Sma-1-10659 | NS_000200.1 | - | 14647921 | 14647872 |
| Sma-1-10660 | NS_000200.1 | - | 12930518 | 12930469 |
| Sma-1-10661 | NS_000200.1 | - | 9766954  | 9766905  |
| Sma-1-10662 | NS_000200.1 | - | 9447263  | 9447214  |
| Sma-1-10663 | NS_000200.1 | - | 9446863  | 9446814  |
| Sma-1-10664 | NS_000200.1 | - | 9388069  | 9388020  |

|             |                |   |           |           |
|-------------|----------------|---|-----------|-----------|
| Sma-1-10665 | NS_000200.1    | - | 7426635   | 7426586   |
| Sma-1-10666 | NS_000200.1    | - | 6907742   | 6907693   |
| Sma-1-10667 | NS_000200.1    | - | 5256618   | 5256569   |
| Sma-1-10668 | NS_000200.1    | - | 5058570   | 5058521   |
| Sma-1-10669 | NS_000200.1    | - | 3339965   | 3339916   |
| Sma-1-10670 | NS_000200.1    | - | 2825011   | 2824962   |
| Sma-1-10671 | NS_000200.1    | - | 1568160   | 1568111   |
| Sma-1-10672 | NS_000200.1    | - | 1078388   | 1078339   |
| Sma-1-10673 | NS_000200.1    | - | 441706    | 441657    |
| Sma-1-10674 | NW_003037872.1 | - | 379721    | 379676    |
| Sma-1-10675 | NS_000200.1    | - | 118336727 | 118336682 |
| Sma-1-10676 | NW_003037834.1 | - | 902781    | 902732    |
| Sma-1-10677 | NW_003037914.1 | + | 679313    | 679362    |
| Sma-1-10678 | NW_003037981.1 | + | 489699    | 489748    |
| Sma-1-10679 | NS_000200.1    | + | 160823563 | 160823612 |
| Sma-1-10680 | NS_000200.1    | + | 212887567 | 212887616 |
| Sma-1-10681 | NS_000200.1    | - | 74063267  | 74063218  |
| Sma-1-10682 | NW_003037874.1 | - | 18742     | 18693     |
| Sma-1-10683 | NS_000200.1    | - | 119443692 | 119443643 |
| Sma-1-10684 | NW_003037977.1 | - | 209986    | 209937    |
| Sma-1-10685 | NS_000200.1    | - | 208496006 | 208495957 |
| Sma-1-10686 | NW_003037995.1 | - | 540367    | 540318    |
| Sma-1-10687 | NS_000200.1    | - | 220230135 | 220230086 |
| Sma-1-10688 | NW_003038073.1 | + | 282342    | 282394    |
| Sma-1-10689 | NW_003038305.1 | - | 1625      | 1573      |
| Sma-1-10690 | NS_000200.1    | + | 265804775 | 265804827 |
| Sma-1-10691 | NS_000200.1    | - | 325748411 | 325748359 |
| Sma-1-10692 | NW_003038124.1 | + | 19225     | 19274     |
| Sma-1-10693 | NS_000200.1    | + | 279011869 | 279011918 |
| Sma-1-10694 | NW_003038217.1 | - | 50924     | 50875     |
| Sma-1-10695 | NW_003037913.1 | + | 652070    | 652119    |
| Sma-1-10696 | NS_000200.1    | + | 159215821 | 159215870 |
| Sma-1-10697 | NS_000200.1    | - | 307212732 | 307212683 |
| Sma-1-10698 | NW_003038111.1 | - | 19921     | 19872     |
| Sma-1-10699 | NS_000200.1    | - | 276339684 | 276339635 |
| Sma-1-10700 | NW_003030236.1 | + | 3903      | 3952      |
| Sma-1-10701 | NW_003037831.1 | + | 1739393   | 1739442   |
| Sma-1-10702 | NW_003037845.1 | + | 176793    | 176842    |
| Sma-1-10703 | NW_003037917.1 | + | 572224    | 572273    |
| Sma-1-10704 | NS_000200.1    | + | 71188695  | 71188744  |
| Sma-1-10705 | NS_000200.1    | + | 87178696  | 87178745  |
| Sma-1-10706 | NS_000200.1    | + | 165609028 | 165609077 |
| Sma-1-10707 | NS_000200.1    | + | 362438384 | 362438433 |
| Sma-1-10708 | NW_003037937.1 | + | 556449    | 556498    |
| Sma-1-10709 | NW_003037937.1 | + | 559055    | 559104    |
| Sma-1-10710 | NS_000200.1    | + | 181756358 | 181756407 |
| Sma-1-10711 | NS_000200.1    | + | 181758964 | 181759013 |
| Sma-1-10712 | NW_003037938.1 | - | 787859    | 787810    |
| Sma-1-10713 | NS_000200.1    | - | 182824972 | 182824923 |
| Sma-1-10714 | NW_003026471.1 | + | 122786    | 122835    |
| Sma-1-10715 | NS_000200.1    | + | 222235019 | 222235068 |
| Sma-1-10716 | NW_003038037.1 | + | 611372    | 611421    |

|             |                |   |           |           |
|-------------|----------------|---|-----------|-----------|
| Sma-1-10717 | NS.000200.1    | + | 250766781 | 250766830 |
| Sma-1-10718 | NW_003038014.1 | + | 363585    | 363634    |
| Sma-1-10719 | NS.000200.1    | + | 230104274 | 230104323 |
| Sma-1-10720 | NW_003038070.1 | + | 29331     | 29380     |
| Sma-1-10721 | NS.000200.1    | + | 264366572 | 264366621 |
| Sma-1-10722 | NW_003037795.1 | - | 1183182   | 1183133   |
| Sma-1-10723 | NS.000200.1    | - | 7574065   | 7574016   |
| Sma-1-10724 | NW_003037797.1 | - | 3334456   | 3334407   |
| Sma-1-10725 | NS.000200.1    | - | 13762316  | 13762267  |
| Sma-1-10726 | NW_003037948.1 | + | 233230    | 233279    |
| Sma-1-10727 | NS.000200.1    | + | 192253174 | 192253223 |
| Sma-1-10728 | NW_003038228.1 | + | 148852    | 148901    |
| Sma-1-10729 | NS.000200.1    | + | 311022132 | 311022181 |
| Sma-1-10730 | NW_003037794.1 | + | 434017    | 434066    |
| Sma-1-10731 | NS.000200.1    | + | 4613612   | 4613661   |
| Sma-1-10732 | NW_003037841.1 | - | 554898    | 554849    |
| Sma-1-10733 | NS.000200.1    | - | 83166079  | 83166030  |
| Sma-1-10734 | NW_003024070.1 | + | 1530      | 1579      |
| Sma-1-10735 | NW_003037836.1 | - | 848026    | 847977    |
| Sma-1-10736 | NS.000200.1    | + | 344578940 | 344578989 |
| Sma-1-10737 | NS.000200.1    | - | 76405125  | 76405076  |
| Sma-1-10738 | NW_003037841.1 | - | 229427    | 229378    |
| Sma-1-10739 | NS.000200.1    | - | 82840608  | 82840559  |
| Sma-1-10740 | NW_003037850.1 | + | 157636    | 157685    |
| Sma-1-10741 | NW_003037976.1 | - | 204900    | 204851    |
| Sma-1-10742 | NW_003037980.1 | - | 903464    | 903415    |
| Sma-1-10743 | NW_003038017.1 | - | 95771     | 95722     |
| Sma-1-10744 | NS.000200.1    | + | 92143666  | 92143715  |
| Sma-1-10745 | NS.000200.1    | - | 231861802 | 231861753 |
| Sma-1-10746 | NS.000200.1    | - | 211864326 | 211864277 |
| Sma-1-10747 | NS.000200.1    | - | 206819215 | 206819166 |
| Sma-1-10748 | NW_003026456.1 | - | 306023    | 305974    |
| Sma-1-10749 | NW_003037853.1 | - | 1320574   | 1320525   |
| Sma-1-10750 | NS.000200.1    | - | 96812625  | 96812576  |
| Sma-1-10751 | NS.000200.1    | - | 58229159  | 58229110  |
| Sma-1-10752 | NW_003026466.1 | - | 61141     | 61092     |
| Sma-1-10753 | NS.000200.1    | - | 215328248 | 215328199 |
| Sma-1-10754 | NW_003038261.1 | + | 437098    | 437147    |
| Sma-1-10755 | NS.000200.1    | + | 324050749 | 324050798 |
| Sma-1-10756 | NW_003038036.1 | + | 371837    | 371886    |
| Sma-1-10757 | NS.000200.1    | + | 249305689 | 249305738 |
| Sma-1-10758 | NW_003026618.1 | + | 101642    | 101691    |
| Sma-1-10759 | NW_003026466.1 | - | 33500     | 33451     |
| Sma-1-10760 | NS.000200.1    | + | 321856644 | 321856693 |
| Sma-1-10761 | NS.000200.1    | - | 215300607 | 215300558 |
| Sma-1-10762 | NW_003037937.1 | + | 453259    | 453308    |
| Sma-1-10763 | NS.000200.1    | + | 181653168 | 181653217 |
| Sma-1-10764 | NW_003037942.1 | + | 338169    | 338218    |
| Sma-1-10765 | NS.000200.1    | + | 186098077 | 186098126 |
| Sma-1-10766 | NW_003039130.1 | + | 152962    | 153011    |
| Sma-1-10767 | NS.000200.1    | + | 317827573 | 317827622 |
| Sma-1-10768 | NW_003037809.1 | + | 173158    | 173207    |

|             |                |   |           |           |
|-------------|----------------|---|-----------|-----------|
| Sma-1-10769 | NW_003038015.1 | + | 473034    | 473083    |
| Sma-1-10770 | NW_003038149.1 | - | 41103     | 41054     |
| Sma-1-10771 | NS_000200.1    | + | 33837622  | 33837671  |
| Sma-1-10772 | NS_000200.1    | + | 230796524 | 230796573 |
| Sma-1-10773 | NS_000200.1    | - | 291069716 | 291069667 |
| Sma-1-10774 | NW_003031903.1 | + | 141       | 190       |
| Sma-1-10775 | NW_003026471.1 | + | 67393     | 67442     |
| Sma-1-10776 | NW_003026456.1 | + | 325247    | 325296    |
| Sma-1-10777 | NW_003037794.1 | - | 1005373   | 1005324   |
| Sma-1-10778 | NW_003037794.1 | - | 952684    | 952635    |
| Sma-1-10779 | NW_003037795.1 | + | 1104760   | 1104809   |
| Sma-1-10780 | NW_003037847.1 | - | 881089    | 881040    |
| Sma-1-10781 | NW_003037866.1 | + | 1415446   | 1415495   |
| Sma-1-10782 | NS_000200.1    | + | 7495643   | 7495692   |
| Sma-1-10783 | NS_000200.1    | + | 58248383  | 58248432  |
| Sma-1-10784 | NS_000200.1    | + | 112903245 | 112903294 |
| Sma-1-10785 | NS_000200.1    | + | 222179626 | 222179675 |
| Sma-1-10786 | NS_000200.1    | + | 367238650 | 367238699 |
| Sma-1-10787 | NS_000200.1    | - | 89532819  | 89532770  |
| Sma-1-10788 | NS_000200.1    | - | 5184968   | 5184919   |
| Sma-1-10789 | NS_000200.1    | - | 5132279   | 5132230   |
| Sma-1-10790 | NW_003037798.1 | - | 2217106   | 2217057   |
| Sma-1-10791 | NW_003037859.1 | + | 679615    | 679664    |
| Sma-1-10792 | NS_000200.1    | + | 103358456 | 103358505 |
| Sma-1-10793 | NS_000200.1    | - | 16476264  | 16476215  |
| Sma-1-10794 | NW_003037973.1 | - | 82326     | 82277     |
| Sma-1-10795 | NS_000200.1    | - | 204064053 | 204064004 |
| Sma-1-10796 | NW_003037873.1 | + | 678822    | 678871    |
| Sma-1-10797 | NW_003026467.1 | - | 26706     | 26657     |
| Sma-1-10798 | NW_003037799.1 | + | 770664    | 770713    |
| Sma-1-10799 | NW_003037917.1 | - | 609401    | 609352    |
| Sma-1-10800 | NW_003037935.1 | + | 782950    | 782999    |
| Sma-1-10801 | NS_000200.1    | + | 17761018  | 17761067  |
| Sma-1-10802 | NS_000200.1    | + | 119417950 | 119417999 |
| Sma-1-10803 | NS_000200.1    | + | 180199485 | 180199534 |
| Sma-1-10804 | NS_000200.1    | - | 215619923 | 215619874 |
| Sma-1-10805 | NS_000200.1    | - | 165646205 | 165646156 |
| Sma-1-10806 | NW_003038505.1 | - | 162450    | 162401    |
| Sma-1-10807 | NS_000200.1    | - | 336241787 | 336241738 |
| Sma-1-10808 | NW_003037801.1 | - | 513206    | 513157    |
| Sma-1-10809 | NW_003037832.1 | + | 487866    | 487915    |
| Sma-1-10810 | NW_003037946.1 | - | 269446    | 269397    |
| Sma-1-10811 | NS_000200.1    | + | 71697297  | 71697346  |
| Sma-1-10812 | NS_000200.1    | - | 190963306 | 190963257 |
| Sma-1-10813 | NS_000200.1    | - | 21602686  | 21602637  |
| Sma-1-10814 | NW_003038509.1 | - | 25377     | 25328     |
| Sma-1-10815 | NS_000200.1    | - | 337657829 | 337657780 |
| Sma-1-10816 | NW_003037901.1 | - | 15956     | 15907     |
| Sma-1-10817 | NS_000200.1    | - | 145864417 | 145864368 |
| Sma-1-10818 | NW_003037854.1 | - | 1912071   | 1912022   |
| Sma-1-10819 | NW_003037969.1 | + | 229812    | 229861    |
| Sma-1-10820 | NS_000200.1    | + | 200835939 | 200835988 |

|             |                |   |           |           |
|-------------|----------------|---|-----------|-----------|
| Sma-1-10821 | NS_000200.1    | - | 98816492  | 98816443  |
| Sma-1-10822 | NW_003038067.1 | + | 21001     | 21050     |
| Sma-1-10823 | NS_000200.1    | + | 262875054 | 262875103 |
| Sma-1-10824 | NW_003037797.1 | - | 2208145   | 2208096   |
| Sma-1-10825 | NS_000200.1    | - | 12636005  | 12635956  |
| Sma-1-10826 | NW_003030509.1 | - | 92        | 43        |
| Sma-1-10827 | NW_003037923.1 | - | 156606    | 156557    |
| Sma-1-10828 | NS_000200.1    | - | 363076112 | 363076063 |
| Sma-1-10829 | NS_000200.1    | - | 171212819 | 171212770 |
| Sma-1-10830 | NW_003035881.1 | - | 295440    | 295391    |
| Sma-1-10831 | NS_000200.1    | - | 341359645 | 341359596 |
| Sma-1-10832 | NW_003037798.1 | - | 82520     | 82471     |
| Sma-1-10833 | NS_000200.1    | - | 14341678  | 14341629  |
| Sma-1-10834 | NW_003037891.1 | - | 1093230   | 1093181   |
| Sma-1-10835 | NS_000200.1    | - | 138974508 | 138974459 |
| Sma-1-10836 | NW_003037846.1 | + | 912534    | 912583    |
| Sma-1-10837 | NS_000200.1    | + | 88547104  | 88547153  |
| Sma-1-10838 | NW_003037944.1 | + | 208730    | 208779    |
| Sma-1-10839 | NS_000200.1    | + | 188430083 | 188430132 |
| Sma-1-10840 | NW_003037794.1 | - | 1086679   | 1086630   |
| Sma-1-10841 | NW_003037858.1 | + | 1131509   | 1131558   |
| Sma-1-10842 | NS_000200.1    | + | 101795785 | 101795834 |
| Sma-1-10843 | NS_000200.1    | - | 5266274   | 5266225   |
| Sma-1-10844 | NW_003037845.1 | - | 295475    | 295426    |
| Sma-1-10845 | NW_003038160.1 | - | 33071     | 33022     |
| Sma-1-10846 | NS_000200.1    | - | 296785002 | 296784953 |
| Sma-1-10847 | NS_000200.1    | - | 87297378  | 87297329  |
| Sma-1-10848 | NW_003037844.1 | - | 432736    | 432687    |
| Sma-1-10849 | NS_000200.1    | - | 86616182  | 86616133  |
| Sma-1-10850 | NW_003037841.1 | + | 987938    | 987987    |
| Sma-1-10851 | NW_003037909.1 | - | 236929    | 236880    |
| Sma-1-10852 | NS_000200.1    | + | 83599119  | 83599168  |
| Sma-1-10853 | NS_000200.1    | - | 153778578 | 153778529 |
| Sma-1-10854 | NW_003037900.1 | + | 62615     | 62664     |
| Sma-1-10855 | NS_000200.1    | + | 145191481 | 145191530 |
| Sma-1-10856 | NW_003037902.1 | - | 206734    | 206685    |
| Sma-1-10857 | NW_003037909.1 | + | 708760    | 708809    |
| Sma-1-10858 | NS_000200.1    | + | 154250409 | 154250458 |
| Sma-1-10859 | NS_000200.1    | - | 146961968 | 146961919 |
| Sma-1-10860 | NW_003037830.1 | - | 720211    | 720162    |
| Sma-1-10861 | NS_000200.1    | - | 68610582  | 68610533  |
| Sma-1-10862 | NW_003037829.1 | - | 1696400   | 1696351   |
| Sma-1-10863 | NS_000200.1    | - | 67596938  | 67596889  |
| Sma-1-10864 | NW_003037809.1 | + | 1499907   | 1499956   |
| Sma-1-10865 | NS_000200.1    | + | 35164371  | 35164420  |
| Sma-1-10866 | NW_003037935.1 | + | 22444     | 22493     |
| Sma-1-10867 | NS_000200.1    | + | 179438979 | 179439028 |
| Sma-1-10868 | NW_003026599.1 | - | 135643    | 135594    |
| Sma-1-10869 | NS_000200.1    | - | 306013972 | 306013923 |
| Sma-1-10870 | NW_003026599.1 | - | 129875    | 129826    |
| Sma-1-10871 | NS_000200.1    | - | 306008204 | 306008155 |
| Sma-1-10872 | NW_003028946.1 | - | 2236      | 2187      |

|             |                |   |           |           |
|-------------|----------------|---|-----------|-----------|
| Sma-1-10873 | NW_003037859.1 | + | 480760    | 480809    |
| Sma-1-10874 | NW_003037967.1 | + | 439757    | 439806    |
| Sma-1-10875 | NS_000200.1    | + | 103159601 | 103159650 |
| Sma-1-10876 | NS_000200.1    | + | 199679728 | 199679777 |
| Sma-1-10877 | NS_000200.1    | - | 374957102 | 374957053 |
| Sma-1-10878 | NW_003037942.1 | + | 326932    | 326981    |
| Sma-1-10879 | NS_000200.1    | + | 186086840 | 186086889 |
| Sma-1-10880 | NW_003037798.1 | + | 701896    | 701945    |
| Sma-1-10881 | NS_000200.1    | + | 14961054  | 14961103  |
| Sma-1-10882 | NW_003037814.1 | - | 830181    | 830132    |
| Sma-1-10883 | NS_000200.1    | - | 43814041  | 43813992  |
| Sma-1-10884 | NW_003037820.1 | + | 207659    | 207708    |
| Sma-1-10885 | NW_003037885.1 | + | 407240    | 407289    |
| Sma-1-10886 | NW_003026516.1 | + | 277124    | 277173    |
| Sma-1-10887 | NS_000200.1    | + | 52480641  | 52480690  |
| Sma-1-10888 | NS_000200.1    | + | 128505187 | 128505236 |
| Sma-1-10889 | NS_000200.1    | + | 299385421 | 299385470 |
| Sma-1-10890 | NW_003037827.1 | - | 24510     | 24461     |
| Sma-1-10891 | NS_000200.1    | - | 62646651  | 62646602  |
| Sma-1-10892 | NW_003037827.1 | + | 1461544   | 1461593   |
| Sma-1-10893 | NS_000200.1    | + | 64083685  | 64083734  |
| Sma-1-10894 | NW_003037823.1 | + | 395757    | 395806    |
| Sma-1-10895 | NS_000200.1    | + | 56312376  | 56312425  |
| Sma-1-10896 | NW_003037818.1 | - | 664576    | 664527    |
| Sma-1-10897 | NS_000200.1    | - | 49379983  | 49379934  |
| Sma-1-10898 | NW_003037829.1 | - | 698862    | 698813    |
| Sma-1-10899 | NS_000200.1    | - | 66599400  | 66599351  |
| Sma-1-10900 | NW_003037923.1 | + | 252464    | 252513    |
| Sma-1-10901 | NS_000200.1    | + | 171308677 | 171308726 |
| Sma-1-10902 | NW_003036826.1 | - | 1574      | 1525      |
| Sma-1-10903 | NS_000200.1    | - | 347801463 | 347801414 |
| Sma-1-10904 | NW_003037836.1 | + | 932096    | 932145    |
| Sma-1-10905 | NW_003038518.1 | - | 318646    | 318597    |
| Sma-1-10906 | NS_000200.1    | + | 76489195  | 76489244  |
| Sma-1-10907 | NS_000200.1    | - | 341955479 | 341955430 |
| Sma-1-10908 | NW_003037926.1 | + | 40323     | 40372     |
| Sma-1-10909 | NS_000200.1    | + | 173208593 | 173208642 |
| Sma-1-10910 | NW_003037837.1 | - | 1012084   | 1012035   |
| Sma-1-10911 | NW_003037866.1 | - | 1030624   | 1030575   |
| Sma-1-10912 | NW_003037941.1 | - | 370391    | 370342    |
| Sma-1-10913 | NW_003038065.1 | + | 26768     | 26817     |
| Sma-1-10914 | NS_000200.1    | + | 262178385 | 262178434 |
| Sma-1-10915 | NS_000200.1    | - | 185104865 | 185104816 |
| Sma-1-10916 | NS_000200.1    | - | 112518423 | 112518374 |
| Sma-1-10917 | NS_000200.1    | - | 77817942  | 77817893  |
| Sma-1-10918 | NW_003037797.1 | - | 2930107   | 2930058   |
| Sma-1-10919 | NS_000200.1    | - | 13357967  | 13357918  |
| Sma-1-10920 | NW_003026471.1 | - | 175055    | 175006    |
| Sma-1-10921 | NW_003037995.1 | + | 16022     | 16071     |
| Sma-1-10922 | NS_000200.1    | + | 219705790 | 219705839 |
| Sma-1-10923 | NS_000200.1    | - | 222287288 | 222287239 |
| Sma-1-10924 | NW_003026471.1 | + | 176693    | 176742    |



|             |                |   |           |           |
|-------------|----------------|---|-----------|-----------|
| Sma-1-10925 | NS.000200.1    | + | 222288926 | 222288975 |
| Sma-1-10926 | NW_003037943.1 | + | 1125383   | 1125432   |
| Sma-1-10927 | NS.000200.1    | + | 188146916 | 188146965 |
| Sma-1-10928 | NW_003038145.1 | - | 229783    | 229734    |
| Sma-1-10929 | NS.000200.1    | - | 288841206 | 288841157 |
| Sma-1-10930 | NW_003026512.1 | + | 293425    | 293474    |
| Sma-1-10931 | NS.000200.1    | + | 285387465 | 285387514 |
| Sma-1-10932 | NW_003026502.1 | + | 32469     | 32518     |
| Sma-1-10933 | NW_003034610.1 | - | 1181      | 1132      |
| Sma-1-10934 | NW_003037979.1 | + | 181744    | 181793    |
| Sma-1-10935 | NS.000200.1    | + | 210242764 | 210242813 |
| Sma-1-10936 | NS.000200.1    | + | 276068905 | 276068954 |
| Sma-1-10937 | NS.000200.1    | - | 327927256 | 327927207 |
| Sma-1-10938 | NW_003034610.1 | - | 1974      | 1925      |
| Sma-1-10939 | NS.000200.1    | - | 327928049 | 327928000 |
| Sma-1-10940 | NW_003037963.1 | - | 41904     | 41855     |
| Sma-1-10941 | NS.000200.1    | - | 197320116 | 197320067 |
| Sma-1-10942 | NW_003038147.1 | + | 24004     | 24053     |
| Sma-1-10943 | NS.000200.1    | + | 289551747 | 289551796 |
| Sma-1-10944 | NW_003037831.1 | + | 1637362   | 1637411   |
| Sma-1-10945 | NW_003037831.1 | - | 845788    | 845739    |
| Sma-1-10946 | NS.000200.1    | + | 71086664  | 71086713  |
| Sma-1-10947 | NS.000200.1    | - | 70295090  | 70295041  |
| Sma-1-10948 | NW_003037853.1 | - | 833972    | 833923    |
| Sma-1-10949 | NS.000200.1    | - | 96326023  | 96325974  |
| Sma-1-10950 | NW_003038258.1 | - | 154191    | 154142    |
| Sma-1-10951 | NS.000200.1    | - | 322692701 | 322692652 |
| Sma-1-10952 | NW_003032045.1 | - | 4985      | 4936      |
| Sma-1-10953 | NW_003038221.1 | - | 102084    | 102035    |
| Sma-1-10954 | NW_003037795.1 | - | 1227767   | 1227718   |
| Sma-1-10955 | NW_003037797.1 | - | 3072642   | 3072593   |
| Sma-1-10956 | NW_003037807.1 | + | 301196    | 301245    |
| Sma-1-10957 | NW_003037887.1 | + | 842464    | 842513    |
| Sma-1-10958 | NW_003037889.1 | + | 1214122   | 1214171   |
| Sma-1-10959 | NW_003037890.1 | - | 1491190   | 1491141   |
| Sma-1-10960 | NW_003037912.1 | - | 159393    | 159344    |
| Sma-1-10961 | NW_003037940.1 | + | 806224    | 806273    |
| Sma-1-10962 | NW_003037981.1 | + | 619392    | 619441    |
| Sma-1-10963 | NW_003038014.1 | + | 213431    | 213480    |
| Sma-1-10964 | NW_003038224.1 | + | 63179     | 63228     |
| Sma-1-10965 | NW_003038252.1 | + | 33238     | 33287     |
| Sma-1-10966 | NW_003038083.1 | - | 625901    | 625852    |
| Sma-1-10967 | NW_003038152.1 | - | 384258    | 384209    |
| Sma-1-10968 | NS.000200.1    | + | 30562712  | 30562761  |
| Sma-1-10969 | NS.000200.1    | + | 131306442 | 131306491 |
| Sma-1-10970 | NS.000200.1    | + | 134990612 | 134990661 |
| Sma-1-10971 | NS.000200.1    | + | 184548354 | 184548403 |
| Sma-1-10972 | NS.000200.1    | + | 213017260 | 213017309 |
| Sma-1-10973 | NS.000200.1    | + | 229954120 | 229954169 |
| Sma-1-10974 | NS.000200.1    | + | 309474907 | 309474956 |
| Sma-1-10975 | NS.000200.1    | + | 318888826 | 318888875 |
| Sma-1-10976 | NS.000200.1    | - | 376985063 | 376985014 |

|             |                |   |           |           |
|-------------|----------------|---|-----------|-----------|
| Sma-1-10977 | NS_000200.1    | - | 308743348 | 308743299 |
| Sma-1-10978 | NS_000200.1    | - | 292989982 | 292989933 |
| Sma-1-10979 | NS_000200.1    | - | 270869238 | 270869189 |
| Sma-1-10980 | NS_000200.1    | - | 156970968 | 156970919 |
| Sma-1-10981 | NS_000200.1    | - | 137174551 | 137174502 |
| Sma-1-10982 | NS_000200.1    | - | 13500502  | 13500453  |
| Sma-1-10983 | NS_000200.1    | - | 7618650   | 7618601   |
| Sma-1-10984 | NW_003035881.1 | - | 74970     | 74921     |
| Sma-1-10985 | NS_000200.1    | - | 341139175 | 341139126 |
| Sma-1-10986 | NW_003038147.1 | + | 149855    | 149904    |
| Sma-1-10987 | NS_000200.1    | + | 289677598 | 289677647 |
| Sma-1-10988 | NW_003039130.1 | + | 189679    | 189728    |
| Sma-1-10989 | NS_000200.1    | + | 317864290 | 317864339 |
| Sma-1-10990 | NW_003020966.1 | + | 480       | 529       |
| Sma-1-10991 | NW_003023078.1 | + | 1196      | 1245      |
| Sma-1-10992 | NW_003037789.1 | + | 25055     | 25104     |
| Sma-1-10993 | NW_003037921.1 | - | 379324    | 379275    |
| Sma-1-10994 | NW_003037978.1 | + | 406121    | 406170    |
| Sma-1-10995 | NW_003038072.1 | + | 3624      | 3673      |
| Sma-1-10996 | NS_000200.1    | + | 209674131 | 209674180 |
| Sma-1-10997 | NS_000200.1    | + | 265165852 | 265165901 |
| Sma-1-10998 | NS_000200.1    | + | 367698557 | 367698606 |
| Sma-1-10999 | NS_000200.1    | + | 372719992 | 372720041 |
| Sma-1-11000 | NS_000200.1    | + | 380809675 | 380809724 |
| Sma-1-11001 | NS_000200.1    | - | 169909459 | 169909410 |
| Sma-1-11002 | NW_003030576.1 | - | 1276      | 1227      |
| Sma-1-11003 | NW_003033936.1 | + | 557       | 606       |
| Sma-1-11004 | NW_003037798.1 | + | 1076427   | 1076476   |
| Sma-1-11005 | NW_003037808.1 | + | 1717344   | 1717393   |
| Sma-1-11006 | NW_003037827.1 | - | 691741    | 691692    |
| Sma-1-11007 | NW_003037841.1 | + | 558680    | 558729    |
| Sma-1-11008 | NW_003037866.1 | + | 301288    | 301337    |
| Sma-1-11009 | NW_003037911.1 | - | 675379    | 675330    |
| Sma-1-11010 | NW_003037964.1 | - | 497555    | 497506    |
| Sma-1-11011 | NW_003038037.1 | + | 18980     | 19029     |
| Sma-1-11012 | NW_003038476.1 | - | 56210     | 56161     |
| Sma-1-11013 | NW_003026486.1 | - | 138168    | 138119    |
| Sma-1-11014 | NW_003026511.1 | - | 193604    | 193555    |
| Sma-1-11015 | NW_003038152.1 | - | 44244     | 44195     |
| Sma-1-11016 | NS_000200.1    | + | 15335585  | 15335634  |
| Sma-1-11017 | NS_000200.1    | + | 33503981  | 33504030  |
| Sma-1-11018 | NS_000200.1    | + | 83169861  | 83169910  |
| Sma-1-11019 | NS_000200.1    | + | 111789087 | 111789136 |
| Sma-1-11020 | NS_000200.1    | + | 250174389 | 250174438 |
| Sma-1-11021 | NS_000200.1    | + | 363265607 | 363265656 |
| Sma-1-11022 | NS_000200.1    | - | 363207535 | 363207486 |
| Sma-1-11023 | NS_000200.1    | - | 332444585 | 332444536 |
| Sma-1-11024 | NS_000200.1    | - | 292649968 | 292649919 |
| Sma-1-11025 | NS_000200.1    | - | 284576656 | 284576607 |
| Sma-1-11026 | NS_000200.1    | - | 259759287 | 259759238 |
| Sma-1-11027 | NS_000200.1    | - | 198099077 | 198099028 |
| Sma-1-11028 | NS_000200.1    | - | 156462732 | 156462683 |

|             |                |   |           |           |
|-------------|----------------|---|-----------|-----------|
| Sma-1-11029 | NS_000200.1    | - | 63313882  | 63313833  |
| Sma-1-11030 | NW_003038028.1 | + | 407766    | 407815    |
| Sma-1-11031 | NS_000200.1    | + | 241715340 | 241715389 |
| Sma-1-11032 | NW_003037786.1 | - | 137514    | 137465    |
| Sma-1-11033 | NW_003037847.1 | - | 740579    | 740530    |
| Sma-1-11034 | NW_003038506.1 | - | 304799    | 304750    |
| Sma-1-11035 | NW_003038518.1 | - | 735765    | 735716    |
| Sma-1-11036 | NS_000200.1    | - | 380230874 | 380230825 |
| Sma-1-11037 | NS_000200.1    | - | 342372598 | 342372549 |
| Sma-1-11038 | NS_000200.1    | - | 336666638 | 336666589 |
| Sma-1-11039 | NS_000200.1    | - | 89392309  | 89392260  |
| Sma-1-11040 | NW_003039130.1 | - | 203468    | 203419    |
| Sma-1-11041 | NW_003037853.1 | + | 236492    | 236541    |
| Sma-1-11042 | NW_003038011.1 | - | 599265    | 599216    |
| Sma-1-11043 | NW_003038025.1 | + | 18870     | 18919     |
| Sma-1-11044 | NW_003038145.1 | + | 26442     | 26491     |
| Sma-1-11045 | NS_000200.1    | + | 95728543  | 95728592  |
| Sma-1-11046 | NS_000200.1    | + | 238877115 | 238877164 |
| Sma-1-11047 | NS_000200.1    | + | 288637865 | 288637914 |
| Sma-1-11048 | NS_000200.1    | - | 317878079 | 317878030 |
| Sma-1-11049 | NS_000200.1    | - | 228126915 | 228126866 |
| Sma-1-11050 | NW_003038453.1 | + | 100322    | 100371    |
| Sma-1-11051 | NS_000200.1    | + | 330682249 | 330682298 |
| Sma-1-11052 | NW_003020433.1 | + | 419       | 468       |
| Sma-1-11053 | NW_003020433.1 | + | 824       | 873       |
| Sma-1-11054 | NW_003020471.1 | - | 1504      | 1455      |
| Sma-1-11055 | NW_003021417.1 | - | 1544      | 1495      |
| Sma-1-11056 | NW_003021590.1 | - | 561       | 512       |
| Sma-1-11057 | NW_003021590.1 | - | 156       | 107       |
| Sma-1-11058 | NW_003021871.1 | - | 955       | 906       |
| Sma-1-11059 | NW_003021871.1 | - | 550       | 501       |
| Sma-1-11060 | NW_003021871.1 | - | 145       | 96        |
| Sma-1-11061 | NW_003022765.1 | + | 1538      | 1587      |
| Sma-1-11062 | NW_003023439.1 | + | 1202      | 1251      |
| Sma-1-11063 | NW_003023454.1 | + | 2123      | 2172      |
| Sma-1-11064 | NW_003023505.1 | - | 1506      | 1457      |
| Sma-1-11065 | NW_003023983.1 | + | 736       | 785       |
| Sma-1-11066 | NW_003024058.1 | - | 994       | 945       |
| Sma-1-11067 | NW_003024070.1 | + | 1125      | 1174      |
| Sma-1-11068 | NW_003025400.1 | + | 147       | 196       |
| Sma-1-11069 | NW_003026129.1 | - | 1691      | 1642      |
| Sma-1-11070 | NW_003026614.1 | - | 8232      | 8183      |
| Sma-1-11071 | NW_003026722.1 | + | 1964      | 2013      |
| Sma-1-11072 | NW_003026722.1 | + | 10072     | 10121     |
| Sma-1-11073 | NW_003029509.1 | - | 1026      | 977       |
| Sma-1-11074 | NW_003029807.1 | - | 3614      | 3565      |
| Sma-1-11075 | NW_003030507.1 | + | 541       | 590       |
| Sma-1-11076 | NW_003031439.1 | - | 939       | 890       |
| Sma-1-11077 | NW_003031439.1 | - | 534       | 485       |
| Sma-1-11078 | NW_003031439.1 | - | 129       | 80        |
| Sma-1-11079 | NW_003031608.1 | + | 226       | 275       |
| Sma-1-11080 | NW_003031608.1 | + | 631       | 680       |

|             |                |   |        |        |
|-------------|----------------|---|--------|--------|
| Sma-1-11081 | NW_003031608.1 | + | 1036   | 1085   |
| Sma-1-11082 | NW_003033323.1 | - | 1519   | 1470   |
| Sma-1-11083 | NW_003033740.1 | + | 34     | 83     |
| Sma-1-11084 | NW_003033991.1 | + | 1347   | 1396   |
| Sma-1-11085 | NW_003034191.1 | + | 63     | 112    |
| Sma-1-11086 | NW_003034191.1 | + | 468    | 517    |
| Sma-1-11087 | NW_003034191.1 | + | 873    | 922    |
| Sma-1-11088 | NW_003034655.1 | + | 123    | 172    |
| Sma-1-11089 | NW_003035112.1 | - | 745    | 696    |
| Sma-1-11090 | NW_003035112.1 | - | 340    | 291    |
| Sma-1-11091 | NW_003035282.1 | - | 1041   | 992    |
| Sma-1-11092 | NW_003035930.1 | + | 1717   | 1766   |
| Sma-1-11093 | NW_003036571.1 | - | 1597   | 1548   |
| Sma-1-11094 | NW_003036571.1 | - | 1192   | 1143   |
| Sma-1-11095 | NW_003036571.1 | - | 787    | 738    |
| Sma-1-11096 | NW_003036571.1 | - | 382    | 333    |
| Sma-1-11097 | NW_003036692.1 | - | 1416   | 1367   |
| Sma-1-11098 | NW_003036692.1 | - | 1011   | 962    |
| Sma-1-11099 | NW_003036692.1 | - | 606    | 557    |
| Sma-1-11100 | NW_003036692.1 | - | 201    | 152    |
| Sma-1-11101 | NW_003038253.1 | - | 70738  | 70689  |
| Sma-1-11102 | NW_003037873.1 | + | 37062  | 37111  |
| Sma-1-11103 | NW_003037873.1 | - | 317388 | 317339 |
| Sma-1-11104 | NW_003035878.1 | - | 281266 | 281217 |
| Sma-1-11105 | NW_003037586.1 | - | 11494  | 11445  |
| Sma-1-11106 | NW_003039108.1 | - | 6744   | 6695   |
| Sma-1-11107 | NW_003037962.1 | - | 318218 | 318169 |
| Sma-1-11108 | NW_003035636.1 | + | 48262  | 48311  |
| Sma-1-11109 | NW_003035636.1 | + | 48667  | 48716  |
| Sma-1-11110 | NW_003035880.1 | + | 348035 | 348084 |
| Sma-1-11111 | NW_003038514.1 | - | 83593  | 83544  |
| Sma-1-11112 | NW_003037898.1 | + | 62503  | 62552  |
| Sma-1-11113 | NW_003038218.1 | + | 75018  | 75067  |
| Sma-1-11114 | NW_003026611.1 | + | 178516 | 178565 |
| Sma-1-11115 | NW_003037772.1 | - | 59334  | 59285  |
| Sma-1-11116 | NW_003038228.1 | + | 147444 | 147493 |
| Sma-1-11117 | NW_003026618.1 | + | 382895 | 382944 |
| Sma-1-11118 | NW_003037779.1 | + | 33267  | 33316  |
| Sma-1-11119 | NW_003037779.1 | - | 31484  | 31435  |
| Sma-1-11120 | NW_003035869.1 | + | 57073  | 57122  |
| Sma-1-11121 | NW_003037470.1 | + | 279    | 328    |
| Sma-1-11122 | NW_003026460.1 | + | 460763 | 460812 |
| Sma-1-11123 | NW_003026465.1 | - | 698562 | 698513 |
| Sma-1-11124 | NW_003026465.1 | - | 558378 | 558329 |
| Sma-1-11125 | NW_003035690.1 | - | 41430  | 41381  |
| Sma-1-11126 | NW_003037238.1 | - | 196    | 147    |
| Sma-1-11127 | NW_003038326.1 | + | 2288   | 2337   |
| Sma-1-11128 | NW_003037995.1 | + | 118714 | 118763 |
| Sma-1-11129 | NW_003037995.1 | + | 119119 | 119168 |
| Sma-1-11130 | NW_003039130.1 | + | 249668 | 249717 |
| Sma-1-11131 | NW_003039130.1 | + | 250073 | 250122 |
| Sma-1-11132 | NW_003038070.1 | - | 231932 | 231883 |

|             |                |   |         |         |
|-------------|----------------|---|---------|---------|
| Sma-1-11133 | NW_003038250.1 | - | 264435  | 264386  |
| Sma-1-11134 | NW_003026456.1 | - | 82603   | 82554   |
| Sma-1-11135 | NW_003037791.1 | + | 70453   | 70502   |
| Sma-1-11136 | NW_003037793.1 | + | 763399  | 763448  |
| Sma-1-11137 | NW_003037793.1 | + | 3173608 | 3173657 |
| Sma-1-11138 | NW_003037793.1 | - | 4124224 | 4124175 |
| Sma-1-11139 | NW_003037793.1 | - | 218360  | 218311  |
| Sma-1-11140 | NW_003037794.1 | - | 1864888 | 1864839 |
| Sma-1-11141 | NW_003037795.1 | + | 1003244 | 1003293 |
| Sma-1-11142 | NW_003037795.1 | + | 1571953 | 1572002 |
| Sma-1-11143 | NW_003037796.1 | - | 1845391 | 1845342 |
| Sma-1-11144 | NW_003037797.1 | - | 373646  | 373597  |
| Sma-1-11145 | NW_003037798.1 | + | 1194881 | 1194930 |
| Sma-1-11146 | NW_003037798.1 | - | 2624108 | 2624059 |
| Sma-1-11147 | NW_003037799.1 | - | 1250084 | 1250035 |
| Sma-1-11148 | NW_003037799.1 | - | 1046738 | 1046689 |
| Sma-1-11149 | NW_003037799.1 | - | 857921  | 857872  |
| Sma-1-11150 | NW_003037799.1 | - | 178208  | 178159  |
| Sma-1-11151 | NW_003037801.1 | + | 582479  | 582528  |
| Sma-1-11152 | NW_003037801.1 | - | 474100  | 474051  |
| Sma-1-11153 | NW_003037803.1 | + | 467778  | 467827  |
| Sma-1-11154 | NW_003037805.1 | + | 1380391 | 1380440 |
| Sma-1-11155 | NW_003037806.1 | + | 288957  | 289006  |
| Sma-1-11156 | NW_003037806.1 | - | 797923  | 797874  |
| Sma-1-11157 | NW_003037808.1 | + | 1326285 | 1326334 |
| Sma-1-11158 | NW_003037808.1 | - | 568140  | 568091  |
| Sma-1-11159 | NW_003037809.1 | + | 2189085 | 2189134 |
| Sma-1-11160 | NW_003037809.1 | - | 2757120 | 2757071 |
| Sma-1-11161 | NW_003037809.1 | - | 1249559 | 1249510 |
| Sma-1-11162 | NW_003037810.1 | + | 50331   | 50380   |
| Sma-1-11163 | NW_003037810.1 | + | 1531046 | 1531095 |
| Sma-1-11164 | NW_003037812.1 | - | 628332  | 628283  |
| Sma-1-11165 | NW_003037813.1 | + | 1534784 | 1534833 |
| Sma-1-11166 | NW_003037817.1 | + | 70102   | 70151   |
| Sma-1-11167 | NW_003037820.1 | - | 716190  | 716141  |
| Sma-1-11168 | NW_003037825.1 | - | 1031361 | 1031312 |
| Sma-1-11169 | NW_003037830.1 | - | 176880  | 176831  |
| Sma-1-11170 | NW_003037833.1 | + | 80424   | 80473   |
| Sma-1-11171 | NW_003037835.1 | + | 60372   | 60421   |
| Sma-1-11172 | NW_003037836.1 | - | 4411    | 4362    |
| Sma-1-11173 | NW_003037837.1 | - | 114073  | 114024  |
| Sma-1-11174 | NW_003037838.1 | - | 480916  | 480867  |
| Sma-1-11175 | NW_003037840.1 | + | 961612  | 961661  |
| Sma-1-11176 | NW_003037841.1 | - | 570524  | 570475  |
| Sma-1-11177 | NW_003037842.1 | + | 344869  | 344918  |
| Sma-1-11178 | NW_003037842.1 | - | 115015  | 114966  |
| Sma-1-11179 | NW_003037847.1 | + | 975218  | 975267  |
| Sma-1-11180 | NW_003037848.1 | + | 72369   | 72418   |
| Sma-1-11181 | NW_003037848.1 | + | 439630  | 439679  |
| Sma-1-11182 | NW_003037848.1 | + | 1188780 | 1188829 |
| Sma-1-11183 | NW_003037849.1 | + | 297263  | 297312  |
| Sma-1-11184 | NW_003037849.1 | - | 812079  | 812030  |

|             |                |   |         |         |
|-------------|----------------|---|---------|---------|
| Sma-1-11185 | NW_003037851.1 | + | 451151  | 451200  |
| Sma-1-11186 | NW_003037851.1 | - | 450505  | 450456  |
| Sma-1-11187 | NW_003037853.1 | + | 348493  | 348542  |
| Sma-1-11188 | NW_003037853.1 | + | 1016442 | 1016491 |
| Sma-1-11189 | NW_003037853.1 | + | 1016848 | 1016897 |
| Sma-1-11190 | NW_003037853.1 | - | 1333977 | 1333928 |
| Sma-1-11191 | NW_003037858.1 | - | 471860  | 471811  |
| Sma-1-11192 | NW_003037858.1 | - | 411695  | 411646  |
| Sma-1-11193 | NW_003037864.1 | + | 1562412 | 1562461 |
| Sma-1-11194 | NW_003037864.1 | - | 488106  | 488057  |
| Sma-1-11195 | NW_003037866.1 | + | 224416  | 224465  |
| Sma-1-11196 | NW_003037866.1 | + | 1534745 | 1534794 |
| Sma-1-11197 | NW_003037866.1 | - | 790166  | 790117  |
| Sma-1-11198 | NW_003037866.1 | - | 224142  | 224093  |
| Sma-1-11199 | NW_003037866.1 | - | 77074   | 77025   |
| Sma-1-11200 | NW_003037878.1 | - | 48426   | 48377   |
| Sma-1-11201 | NW_003037884.1 | - | 1156666 | 1156617 |
| Sma-1-11202 | NW_003037885.1 | + | 537924  | 537973  |
| Sma-1-11203 | NW_003037885.1 | - | 773185  | 773136  |
| Sma-1-11204 | NW_003037896.1 | - | 75427   | 75378   |
| Sma-1-11205 | NW_003037899.1 | - | 497249  | 497200  |
| Sma-1-11206 | NW_003037905.1 | - | 393828  | 393779  |
| Sma-1-11207 | NW_003037906.1 | + | 449327  | 449376  |
| Sma-1-11208 | NW_003037906.1 | + | 597025  | 597074  |
| Sma-1-11209 | NW_003037906.1 | - | 648944  | 648895  |
| Sma-1-11210 | NW_003037909.1 | - | 626832  | 626783  |
| Sma-1-11211 | NW_003037911.1 | - | 865542  | 865493  |
| Sma-1-11212 | NW_003037912.1 | - | 942731  | 942682  |
| Sma-1-11213 | NW_003037913.1 | - | 1252298 | 1252249 |
| Sma-1-11214 | NW_003037914.1 | + | 600721  | 600770  |
| Sma-1-11215 | NW_003037914.1 | + | 1112075 | 1112124 |
| Sma-1-11216 | NW_003037914.1 | - | 1110968 | 1110919 |
| Sma-1-11217 | NW_003037915.1 | + | 1080910 | 1080959 |
| Sma-1-11218 | NW_003037915.1 | + | 1091428 | 1091477 |
| Sma-1-11219 | NW_003037918.1 | - | 2061250 | 2061201 |
| Sma-1-11220 | NW_003037918.1 | - | 1556666 | 1556617 |
| Sma-1-11221 | NW_003037918.1 | - | 1473041 | 1472992 |
| Sma-1-11222 | NW_003037918.1 | - | 133367  | 133318  |
| Sma-1-11223 | NW_003037938.1 | + | 770302  | 770351  |
| Sma-1-11224 | NW_003037939.1 | - | 97887   | 97838   |
| Sma-1-11225 | NW_003037943.1 | + | 773666  | 773715  |
| Sma-1-11226 | NW_003037943.1 | - | 715841  | 715792  |
| Sma-1-11227 | NW_003037944.1 | - | 719407  | 719358  |
| Sma-1-11228 | NW_003037945.1 | - | 1026581 | 1026532 |
| Sma-1-11229 | NW_003037946.1 | + | 157274  | 157323  |
| Sma-1-11230 | NW_003037949.1 | + | 116493  | 116542  |
| Sma-1-11231 | NW_003037966.1 | + | 113579  | 113628  |
| Sma-1-11232 | NW_003037966.1 | - | 272190  | 272141  |
| Sma-1-11233 | NW_003037972.1 | + | 725088  | 725137  |
| Sma-1-11234 | NW_003037973.1 | + | 646525  | 646574  |
| Sma-1-11235 | NW_003037975.1 | - | 607085  | 607036  |
| Sma-1-11236 | NW_003037976.1 | - | 36529   | 36480   |

|             |                |   |         |         |
|-------------|----------------|---|---------|---------|
| Sma-1-11237 | NW_003037981.1 | + | 8255    | 8304    |
| Sma-1-11238 | NW_003037996.1 | + | 221557  | 221606  |
| Sma-1-11239 | NW_003037996.1 | - | 114742  | 114693  |
| Sma-1-11240 | NW_003038001.1 | + | 600     | 649     |
| Sma-1-11241 | NW_003038003.1 | + | 247626  | 247675  |
| Sma-1-11242 | NW_003038008.1 | - | 211653  | 211604  |
| Sma-1-11243 | NW_003038011.1 | - | 581852  | 581803  |
| Sma-1-11244 | NW_003038014.1 | + | 197306  | 197355  |
| Sma-1-11245 | NW_003038019.1 | + | 168517  | 168566  |
| Sma-1-11246 | NW_003038019.1 | + | 412243  | 412292  |
| Sma-1-11247 | NW_003038019.1 | - | 412145  | 412096  |
| Sma-1-11248 | NW_003038024.1 | + | 39756   | 39805   |
| Sma-1-11249 | NW_003038028.1 | + | 494091  | 494140  |
| Sma-1-11250 | NW_003038032.1 | + | 293151  | 293200  |
| Sma-1-11251 | NW_003038032.1 | + | 604656  | 604705  |
| Sma-1-11252 | NW_003038033.1 | + | 124044  | 124093  |
| Sma-1-11253 | NW_003038033.1 | + | 817854  | 817903  |
| Sma-1-11254 | NW_003038036.1 | - | 161513  | 161464  |
| Sma-1-11255 | NW_003038037.1 | + | 677121  | 677170  |
| Sma-1-11256 | NW_003038038.1 | + | 1106223 | 1106272 |
| Sma-1-11257 | NW_003038224.1 | - | 208790  | 208741  |
| Sma-1-11258 | NW_003038229.1 | + | 103162  | 103211  |
| Sma-1-11259 | NW_003038229.1 | - | 103540  | 103491  |
| Sma-1-11260 | NW_003038259.1 | + | 308915  | 308964  |
| Sma-1-11261 | NW_003038515.1 | + | 398871  | 398920  |
| Sma-1-11262 | NW_003038518.1 | - | 316293  | 316244  |
| Sma-1-11263 | NW_003039127.1 | - | 200805  | 200756  |
| Sma-1-11264 | NW_003026474.1 | + | 63759   | 63808   |
| Sma-1-11265 | NW_003026480.1 | - | 22913   | 22864   |
| Sma-1-11266 | NW_003026505.1 | + | 172773  | 172822  |
| Sma-1-11267 | NW_003026510.1 | + | 88387   | 88436   |
| Sma-1-11268 | NW_003026515.1 | - | 194589  | 194540  |
| Sma-1-11269 | NW_003026515.1 | - | 149179  | 149130  |
| Sma-1-11270 | NW_003026574.1 | + | 58684   | 58733   |
| Sma-1-11271 | NW_003038055.1 | + | 163923  | 163972  |
| Sma-1-11272 | NW_003038068.1 | + | 124310  | 124359  |
| Sma-1-11273 | NW_003038068.1 | + | 124715  | 124764  |
| Sma-1-11274 | NW_003038075.1 | - | 15887   | 15838   |
| Sma-1-11275 | NW_003038080.1 | + | 343451  | 343500  |
| Sma-1-11276 | NW_003038083.1 | - | 708163  | 708114  |
| Sma-1-11277 | NW_003038083.1 | - | 444603  | 444554  |
| Sma-1-11278 | NW_003038084.1 | - | 22318   | 22269   |
| Sma-1-11279 | NW_003038086.1 | + | 366099  | 366148  |
| Sma-1-11280 | NW_003038086.1 | - | 428107  | 428058  |
| Sma-1-11281 | NW_003038102.1 | + | 67776   | 67825   |
| Sma-1-11282 | NW_003038109.1 | - | 66449   | 66400   |
| Sma-1-11283 | NW_003038114.1 | + | 141396  | 141445  |
| Sma-1-11284 | NW_003038115.1 | - | 86992   | 86943   |
| Sma-1-11285 | NW_003038132.1 | + | 400072  | 400121  |
| Sma-1-11286 | NW_003038134.1 | - | 55996   | 55947   |
| Sma-1-11287 | NW_003038148.1 | - | 80867   | 80818   |
| Sma-1-11288 | NW_003038153.1 | + | 287911  | 287960  |

|             |             |   |           |           |
|-------------|-------------|---|-----------|-----------|
| Sma-1-11289 | NS_000200.1 | + | 763399    | 763448    |
| Sma-1-11290 | NS_000200.1 | + | 3173608   | 3173657   |
| Sma-1-11291 | NS_000200.1 | + | 7394127   | 7394176   |
| Sma-1-11292 | NS_000200.1 | + | 7962836   | 7962885   |
| Sma-1-11293 | NS_000200.1 | + | 15454039  | 15454088  |
| Sma-1-11294 | NS_000200.1 | + | 21671959  | 21672008  |
| Sma-1-11295 | NS_000200.1 | + | 23968315  | 23968364  |
| Sma-1-11296 | NS_000200.1 | + | 27938235  | 27938284  |
| Sma-1-11297 | NS_000200.1 | + | 28484171  | 28484220  |
| Sma-1-11298 | NS_000200.1 | + | 33112922  | 33112971  |
| Sma-1-11299 | NS_000200.1 | + | 35853549  | 35853598  |
| Sma-1-11300 | NS_000200.1 | + | 36654853  | 36654902  |
| Sma-1-11301 | NS_000200.1 | + | 38135568  | 38135617  |
| Sma-1-11302 | NS_000200.1 | + | 42521647  | 42521696  |
| Sma-1-11303 | NS_000200.1 | + | 47452454  | 47452503  |
| Sma-1-11304 | NS_000200.1 | + | 72271520  | 72271569  |
| Sma-1-11305 | NS_000200.1 | + | 74456880  | 74456929  |
| Sma-1-11306 | NS_000200.1 | + | 81584936  | 81584985  |
| Sma-1-11307 | NS_000200.1 | + | 85444059  | 85444108  |
| Sma-1-11308 | NS_000200.1 | + | 89626948  | 89626997  |
| Sma-1-11309 | NS_000200.1 | + | 89765440  | 89765489  |
| Sma-1-11310 | NS_000200.1 | + | 90132701  | 90132750  |
| Sma-1-11311 | NS_000200.1 | + | 90881851  | 90881900  |
| Sma-1-11312 | NS_000200.1 | + | 91273536  | 91273585  |
| Sma-1-11313 | NS_000200.1 | + | 93854461  | 93854510  |
| Sma-1-11314 | NS_000200.1 | + | 95840544  | 95840593  |
| Sma-1-11315 | NS_000200.1 | + | 96508493  | 96508542  |
| Sma-1-11316 | NS_000200.1 | + | 96508899  | 96508948  |
| Sma-1-11317 | NS_000200.1 | + | 110054986 | 110055035 |
| Sma-1-11318 | NS_000200.1 | + | 111712215 | 111712264 |
| Sma-1-11319 | NS_000200.1 | + | 113022544 | 113022593 |
| Sma-1-11320 | NS_000200.1 | + | 118776190 | 118776239 |
| Sma-1-11321 | NS_000200.1 | + | 128635871 | 128635920 |
| Sma-1-11322 | NS_000200.1 | + | 144046325 | 144046374 |
| Sma-1-11323 | NS_000200.1 | + | 150757106 | 150757155 |
| Sma-1-11324 | NS_000200.1 | + | 150904804 | 150904853 |
| Sma-1-11325 | NS_000200.1 | + | 160744971 | 160745020 |
| Sma-1-11326 | NS_000200.1 | + | 161256325 | 161256374 |
| Sma-1-11327 | NS_000200.1 | + | 162980896 | 162980945 |
| Sma-1-11328 | NS_000200.1 | + | 162991414 | 162991463 |
| Sma-1-11329 | NS_000200.1 | + | 170982969 | 170983018 |
| Sma-1-11330 | NS_000200.1 | + | 182807415 | 182807464 |
| Sma-1-11331 | NS_000200.1 | + | 187795199 | 187795248 |
| Sma-1-11332 | NS_000200.1 | + | 190851134 | 190851183 |
| Sma-1-11333 | NS_000200.1 | + | 192378540 | 192378589 |
| Sma-1-11334 | NS_000200.1 | + | 198815442 | 198815491 |
| Sma-1-11335 | NS_000200.1 | + | 203200792 | 203200841 |
| Sma-1-11336 | NS_000200.1 | + | 204628252 | 204628301 |
| Sma-1-11337 | NS_000200.1 | + | 212406123 | 212406172 |
| Sma-1-11338 | NS_000200.1 | + | 219808482 | 219808531 |
| Sma-1-11339 | NS_000200.1 | + | 219808887 | 219808936 |
| Sma-1-11340 | NS_000200.1 | + | 220466433 | 220466482 |



|             |             |   |           |           |
|-------------|-------------|---|-----------|-----------|
| Sma-1-11341 | NS_000200.1 | + | 222710161 | 222710210 |
| Sma-1-11342 | NS_000200.1 | + | 223746908 | 223746957 |
| Sma-1-11343 | NS_000200.1 | + | 229937995 | 229938044 |
| Sma-1-11344 | NS_000200.1 | + | 233485335 | 233485384 |
| Sma-1-11345 | NS_000200.1 | + | 233729061 | 233729110 |
| Sma-1-11346 | NS_000200.1 | + | 237936785 | 237936834 |
| Sma-1-11347 | NS_000200.1 | + | 241801665 | 241801714 |
| Sma-1-11348 | NS_000200.1 | + | 245452311 | 245452360 |
| Sma-1-11349 | NS_000200.1 | + | 245763816 | 245763865 |
| Sma-1-11350 | NS_000200.1 | + | 246104046 | 246104095 |
| Sma-1-11351 | NS_000200.1 | + | 246797856 | 246797905 |
| Sma-1-11352 | NS_000200.1 | + | 250832530 | 250832579 |
| Sma-1-11353 | NS_000200.1 | + | 253009616 | 253009665 |
| Sma-1-11354 | NS_000200.1 | + | 253262334 | 253262383 |
| Sma-1-11355 | NS_000200.1 | + | 258863245 | 258863294 |
| Sma-1-11356 | NS_000200.1 | + | 263191518 | 263191567 |
| Sma-1-11357 | NS_000200.1 | + | 263191923 | 263191972 |
| Sma-1-11358 | NS_000200.1 | + | 268796061 | 268796110 |
| Sma-1-11359 | NS_000200.1 | + | 272614692 | 272614741 |
| Sma-1-11360 | NS_000200.1 | + | 274746722 | 274746771 |
| Sma-1-11361 | NS_000200.1 | + | 276867301 | 276867350 |
| Sma-1-11362 | NS_000200.1 | + | 279425895 | 279425944 |
| Sma-1-11363 | NS_000200.1 | + | 282820542 | 282820591 |
| Sma-1-11364 | NS_000200.1 | + | 283528568 | 283528617 |
| Sma-1-11365 | NS_000200.1 | + | 293349960 | 293350009 |
| Sma-1-11366 | NS_000200.1 | + | 301866017 | 301866066 |
| Sma-1-11367 | NS_000200.1 | + | 307515316 | 307515365 |
| Sma-1-11368 | NS_000200.1 | + | 310748300 | 310748349 |
| Sma-1-11369 | NS_000200.1 | + | 311020724 | 311020773 |
| Sma-1-11370 | NS_000200.1 | + | 311220384 | 311220433 |
| Sma-1-11371 | NS_000200.1 | + | 317924279 | 317924328 |
| Sma-1-11372 | NS_000200.1 | + | 317924684 | 317924733 |
| Sma-1-11373 | NS_000200.1 | + | 322137897 | 322137946 |
| Sma-1-11374 | NS_000200.1 | + | 323169514 | 323169563 |
| Sma-1-11375 | NS_000200.1 | + | 325413227 | 325413276 |
| Sma-1-11376 | NS_000200.1 | + | 325421335 | 325421384 |
| Sma-1-11377 | NS_000200.1 | + | 326191277 | 326191326 |
| Sma-1-11378 | NS_000200.1 | + | 326506952 | 326507001 |
| Sma-1-11379 | NS_000200.1 | + | 326507357 | 326507406 |
| Sma-1-11380 | NS_000200.1 | + | 326507762 | 326507811 |
| Sma-1-11381 | NS_000200.1 | + | 328039131 | 328039180 |
| Sma-1-11382 | NS_000200.1 | + | 329520324 | 329520373 |
| Sma-1-11383 | NS_000200.1 | + | 329520729 | 329520778 |
| Sma-1-11384 | NS_000200.1 | + | 335241273 | 335241322 |
| Sma-1-11385 | NS_000200.1 | + | 339589099 | 339589148 |
| Sma-1-11386 | NS_000200.1 | + | 340482936 | 340482985 |
| Sma-1-11387 | NS_000200.1 | + | 343053940 | 343053989 |
| Sma-1-11388 | NS_000200.1 | + | 344365749 | 344365798 |
| Sma-1-11389 | NS_000200.1 | + | 344578535 | 344578584 |
| Sma-1-11390 | NS_000200.1 | + | 352642129 | 352642178 |
| Sma-1-11391 | NS_000200.1 | + | 353520528 | 353520577 |
| Sma-1-11392 | NS_000200.1 | + | 353520933 | 353520982 |

|             |             |   |           |           |
|-------------|-------------|---|-----------|-----------|
| Sma-1-11393 | NS_000200.1 | + | 353521338 | 353521387 |
| Sma-1-11394 | NS_000200.1 | + | 355096026 | 355096075 |
| Sma-1-11395 | NS_000200.1 | + | 355096431 | 355096480 |
| Sma-1-11396 | NS_000200.1 | + | 358812458 | 358812507 |
| Sma-1-11397 | NS_000200.1 | + | 363074177 | 363074226 |
| Sma-1-11398 | NS_000200.1 | + | 363369143 | 363369192 |
| Sma-1-11399 | NS_000200.1 | + | 368058783 | 368058832 |
| Sma-1-11400 | NS_000200.1 | + | 369846043 | 369846092 |
| Sma-1-11401 | NS_000200.1 | + | 373387858 | 373387907 |
| Sma-1-11402 | NS_000200.1 | + | 373428971 | 373429020 |
| Sma-1-11403 | NS_000200.1 | + | 378984429 | 378984478 |
| Sma-1-11404 | NS_000200.1 | + | 381775881 | 381775930 |
| Sma-1-11405 | NS_000200.1 | - | 378982646 | 378982597 |
| Sma-1-11406 | NS_000200.1 | - | 378496693 | 378496644 |
| Sma-1-11407 | NS_000200.1 | - | 375952974 | 375952925 |
| Sma-1-11408 | NS_000200.1 | - | 372540838 | 372540789 |
| Sma-1-11409 | NS_000200.1 | - | 370944073 | 370944024 |
| Sma-1-11410 | NS_000200.1 | - | 365453139 | 365453090 |
| Sma-1-11411 | NS_000200.1 | - | 364011453 | 364011404 |
| Sma-1-11412 | NS_000200.1 | - | 362187942 | 362187893 |
| Sma-1-11413 | NS_000200.1 | - | 360643261 | 360643212 |
| Sma-1-11414 | NS_000200.1 | - | 355166310 | 355166261 |
| Sma-1-11415 | NS_000200.1 | - | 354797173 | 354797124 |
| Sma-1-11416 | NS_000200.1 | - | 354796768 | 354796719 |
| Sma-1-11417 | NS_000200.1 | - | 354796363 | 354796314 |
| Sma-1-11418 | NS_000200.1 | - | 354795958 | 354795909 |
| Sma-1-11419 | NS_000200.1 | - | 352006418 | 352006369 |
| Sma-1-11420 | NS_000200.1 | - | 352006013 | 352005964 |
| Sma-1-11421 | NS_000200.1 | - | 352005608 | 352005559 |
| Sma-1-11422 | NS_000200.1 | - | 351544817 | 351544768 |
| Sma-1-11423 | NS_000200.1 | - | 351544412 | 351544363 |
| Sma-1-11424 | NS_000200.1 | - | 351544007 | 351543958 |
| Sma-1-11425 | NS_000200.1 | - | 351543602 | 351543553 |
| Sma-1-11426 | NS_000200.1 | - | 351373435 | 351373386 |
| Sma-1-11427 | NS_000200.1 | - | 351373030 | 351372981 |
| Sma-1-11428 | NS_000200.1 | - | 349975750 | 349975701 |
| Sma-1-11429 | NS_000200.1 | - | 349975345 | 349975296 |
| Sma-1-11430 | NS_000200.1 | - | 349974940 | 349974891 |
| Sma-1-11431 | NS_000200.1 | - | 349264589 | 349264540 |
| Sma-1-11432 | NS_000200.1 | - | 348133535 | 348133486 |
| Sma-1-11433 | NS_000200.1 | - | 348133130 | 348133081 |
| Sma-1-11434 | NS_000200.1 | - | 347984961 | 347984912 |
| Sma-1-11435 | NS_000200.1 | - | 344557695 | 344557646 |
| Sma-1-11436 | NS_000200.1 | - | 344036011 | 344035962 |
| Sma-1-11437 | NS_000200.1 | - | 341953126 | 341953077 |
| Sma-1-11438 | NS_000200.1 | - | 339708132 | 339708083 |
| Sma-1-11439 | NS_000200.1 | - | 337491076 | 337491027 |
| Sma-1-11440 | NS_000200.1 | - | 333180062 | 333180013 |
| Sma-1-11441 | NS_000200.1 | - | 319388535 | 319388486 |
| Sma-1-11442 | NS_000200.1 | - | 318317112 | 318317063 |
| Sma-1-11443 | NS_000200.1 | - | 315904963 | 315904914 |
| Sma-1-11444 | NS_000200.1 | - | 311220762 | 311220713 |

|             |             |   |           |           |
|-------------|-------------|---|-----------|-----------|
| Sma-1-11445 | NS_000200.1 | - | 309620518 | 309620469 |
| Sma-1-11446 | NS_000200.1 | - | 290839000 | 290838951 |
| Sma-1-11447 | NS_000200.1 | - | 290793590 | 290793541 |
| Sma-1-11448 | NS_000200.1 | - | 290154851 | 290154802 |
| Sma-1-11449 | NS_000200.1 | - | 283247113 | 283247064 |
| Sma-1-11450 | NS_000200.1 | - | 277142287 | 277142238 |
| Sma-1-11451 | NS_000200.1 | - | 275749127 | 275749078 |
| Sma-1-11452 | NS_000200.1 | - | 272676700 | 272676651 |
| Sma-1-11453 | NS_000200.1 | - | 271037562 | 271037513 |
| Sma-1-11454 | NS_000200.1 | - | 270951500 | 270951451 |
| Sma-1-11455 | NS_000200.1 | - | 270687940 | 270687891 |
| Sma-1-11456 | NS_000200.1 | - | 266134098 | 266134049 |
| Sma-1-11457 | NS_000200.1 | - | 264569173 | 264569124 |
| Sma-1-11458 | NS_000200.1 | - | 254908470 | 254908421 |
| Sma-1-11459 | NS_000200.1 | - | 249095365 | 249095316 |
| Sma-1-11460 | NS_000200.1 | - | 233728963 | 233728914 |
| Sma-1-11461 | NS_000200.1 | - | 228109502 | 228109453 |
| Sma-1-11462 | NS_000200.1 | - | 225884749 | 225884700 |
| Sma-1-11463 | NS_000200.1 | - | 220359618 | 220359569 |
| Sma-1-11464 | NS_000200.1 | - | 208091156 | 208091107 |
| Sma-1-11465 | NS_000200.1 | - | 207950972 | 207950923 |
| Sma-1-11466 | NS_000200.1 | - | 206650844 | 206650795 |
| Sma-1-11467 | NS_000200.1 | - | 206189309 | 206189260 |
| Sma-1-11468 | NS_000200.1 | - | 198974053 | 198974004 |
| Sma-1-11469 | NS_000200.1 | - | 196395061 | 196395012 |
| Sma-1-11470 | NS_000200.1 | - | 190128545 | 190128496 |
| Sma-1-11471 | NS_000200.1 | - | 188940760 | 188940711 |
| Sma-1-11472 | NS_000200.1 | - | 187737374 | 187737325 |
| Sma-1-11473 | NS_000200.1 | - | 182967641 | 182967592 |
| Sma-1-11474 | NS_000200.1 | - | 168628240 | 168628191 |
| Sma-1-11475 | NS_000200.1 | - | 168123656 | 168123607 |
| Sma-1-11476 | NS_000200.1 | - | 168040031 | 168039982 |
| Sma-1-11477 | NS_000200.1 | - | 166700357 | 166700308 |
| Sma-1-11478 | NS_000200.1 | - | 161255218 | 161255169 |
| Sma-1-11479 | NS_000200.1 | - | 159816049 | 159816000 |
| Sma-1-11480 | NS_000200.1 | - | 157754306 | 157754257 |
| Sma-1-11481 | NS_000200.1 | - | 156652895 | 156652846 |
| Sma-1-11482 | NS_000200.1 | - | 154168481 | 154168432 |
| Sma-1-11483 | NS_000200.1 | - | 150956723 | 150956674 |
| Sma-1-11484 | NS_000200.1 | - | 149662840 | 149662791 |
| Sma-1-11485 | NS_000200.1 | - | 145016360 | 145016311 |
| Sma-1-11486 | NS_000200.1 | - | 142995850 | 142995801 |
| Sma-1-11487 | NS_000200.1 | - | 128871132 | 128871083 |
| Sma-1-11488 | NS_000200.1 | - | 127936331 | 127936282 |
| Sma-1-11489 | NS_000200.1 | - | 122101904 | 122101855 |
| Sma-1-11490 | NS_000200.1 | - | 119056516 | 119056467 |
| Sma-1-11491 | NS_000200.1 | - | 113278304 | 113278255 |
| Sma-1-11492 | NS_000200.1 | - | 112277965 | 112277916 |
| Sma-1-11493 | NS_000200.1 | - | 111711941 | 111711892 |
| Sma-1-11494 | NS_000200.1 | - | 111564873 | 111564824 |
| Sma-1-11495 | NS_000200.1 | - | 108980680 | 108980631 |
| Sma-1-11496 | NS_000200.1 | - | 101136136 | 101136087 |

|             |                   |   |           |           |
|-------------|-------------------|---|-----------|-----------|
| Sma-1-11497 | NS_000200.1       | - | 101075971 | 101075922 |
| Sma-1-11498 | NS_000200.1       | - | 96826028  | 96825979  |
| Sma-1-11499 | NS_000200.1       | - | 93853815  | 93853766  |
| Sma-1-11500 | NS_000200.1       | - | 91788352  | 91788303  |
| Sma-1-11501 | NS_000200.1       | - | 85214205  | 85214156  |
| Sma-1-11502 | NS_000200.1       | - | 83181705  | 83181656  |
| Sma-1-11503 | NS_000200.1       | - | 78479479  | 78479430  |
| Sma-1-11504 | NS_000200.1       | - | 76919931  | 76919882  |
| Sma-1-11505 | NS_000200.1       | - | 75561510  | 75561461  |
| Sma-1-11506 | NS_000200.1       | - | 68067251  | 68067202  |
| Sma-1-11507 | NS_000200.1       | - | 60161143  | 60161094  |
| Sma-1-11508 | NS_000200.1       | - | 58005739  | 58005690  |
| Sma-1-11509 | NS_000200.1       | - | 52989172  | 52989123  |
| Sma-1-11510 | NS_000200.1       | - | 40111071  | 40111022  |
| Sma-1-11511 | NS_000200.1       | - | 36421584  | 36421535  |
| Sma-1-11512 | NS_000200.1       | - | 34914023  | 34913974  |
| Sma-1-11513 | NS_000200.1       | - | 32354777  | 32354728  |
| Sma-1-11514 | NS_000200.1       | - | 28993137  | 28993088  |
| Sma-1-11515 | NS_000200.1       | - | 21563580  | 21563531  |
| Sma-1-11516 | NS_000200.1       | - | 18240438  | 18240389  |
| Sma-1-11517 | NS_000200.1       | - | 18037092  | 18037043  |
| Sma-1-11518 | NS_000200.1       | - | 17848275  | 17848226  |
| Sma-1-11519 | NS_000200.1       | - | 17168562  | 17168513  |
| Sma-1-11520 | NS_000200.1       | - | 16883266  | 16883217  |
| Sma-1-11521 | NS_000200.1       | - | 10801506  | 10801457  |
| Sma-1-11522 | NS_000200.1       | - | 10055035  | 10054986  |
| Sma-1-11523 | NS_000200.1       | - | 6044483   | 6044434   |
| Sma-1-11524 | NS_000200.1       | - | 4124224   | 4124175   |
| Sma-1-11525 | NS_000200.1       | - | 218360    | 218311    |
| Tcr-1-3     | NZ_AAHK01022669.1 | + | 344       | 393       |
| Tcr-1-4     | NZ_AAHK01022669.1 | + | 749       | 798       |
| Sma-1-11526 | NW_003035894.1    | - | 160       | 111       |
| Sma-1-11527 | NS_000200.1       | - | 342932262 | 342932213 |
| Sma-1-11528 | NW_003037859.1    | + | 854165    | 854214    |
| Sma-1-11529 | NS_000200.1       | + | 103533006 | 103533055 |
| Sma-1-11530 | NW_003037865.1    | + | 544369    | 544418    |
| Sma-1-11531 | NS_000200.1       | + | 110966288 | 110966337 |
| Sma-1-11532 | NW_003037844.1    | - | 774063    | 774014    |
| Sma-1-11533 | NS_000200.1       | - | 86957509  | 86957460  |
| Sma-1-11534 | NW_003037835.1    | + | 1001116   | 1001165   |
| Sma-1-11535 | NS_000200.1       | + | 75397624  | 75397673  |
| Sma-1-11536 | NW_003037833.1    | - | 638325    | 638276    |
| Sma-1-11537 | NS_000200.1       | - | 72829421  | 72829372  |
| Sma-1-11538 | NW_003037904.1    | - | 108842    | 108793    |
| Sma-1-11539 | NS_000200.1       | - | 148823341 | 148823292 |
| Sma-1-11540 | NW_003037832.1    | - | 684747    | 684698    |
| Sma-1-11541 | NS_000200.1       | - | 71894178  | 71894129  |
| Sma-1-11542 | NW_003037796.1    | + | 1675092   | 1675141   |
| Sma-1-11543 | NS_000200.1       | + | 9884736   | 9884785   |
| Sma-1-11544 | NW_003037808.1    | - | 1325901   | 1325852   |
| Sma-1-11545 | NS_000200.1       | - | 33112538  | 33112489  |
| Sma-1-11546 | NW_003037825.1    | + | 1393987   | 1394036   |

|             |                |   |           |           |
|-------------|----------------|---|-----------|-----------|
| Sma-1-11547 | NS.000200.1    | + | 60523769  | 60523818  |
| Sma-1-11548 | NW_003037920.1 | - | 282995    | 282946    |
| Sma-1-11549 | NS.000200.1    | - | 169463802 | 169463753 |
| Sma-1-11550 | NW_003037923.1 | - | 294674    | 294625    |
| Sma-1-11551 | NS.000200.1    | - | 171350887 | 171350838 |
| Sma-1-11552 | NW_003026472.1 | - | 71070     | 71021     |
| Sma-1-11553 | NS.000200.1    | - | 236483062 | 236483013 |
| Sma-1-11554 | NW_003038261.1 | - | 192091    | 192042    |
| Sma-1-11555 | NS.000200.1    | - | 323805742 | 323805693 |
| Sma-1-11556 | NW_003038258.1 | - | 165109    | 165060    |
| Sma-1-11557 | NS.000200.1    | - | 322703619 | 322703570 |
| Sma-1-11558 | NW_003037797.1 | + | 1691515   | 1691564   |
| Sma-1-11559 | NW_003037809.1 | - | 858507    | 858458    |
| Sma-1-11560 | NW_003037910.1 | + | 957995    | 958044    |
| Sma-1-11561 | NW_003038072.1 | + | 86335     | 86384     |
| Sma-1-11562 | NS.000200.1    | + | 12119375  | 12119424  |
| Sma-1-11563 | NS.000200.1    | + | 155469970 | 155470019 |
| Sma-1-11564 | NS.000200.1    | + | 265248563 | 265248612 |
| Sma-1-11565 | NS.000200.1    | - | 34522971  | 34522922  |
| Sma-1-11566 | NW_003037971.1 | - | 823047    | 822998    |
| Sma-1-11567 | NS.000200.1    | - | 202445097 | 202445048 |
| Sma-1-11568 | NW_003026517.1 | - | 110929    | 110880    |
| Sma-1-11569 | NS.000200.1    | - | 299716938 | 299716889 |
| Sma-1-11570 | NW_003038260.1 | - | 285470    | 285421    |
| Sma-1-11571 | NS.000200.1    | - | 323457245 | 323457196 |
| Sma-1-11572 | NW_003026469.1 | - | 157321    | 157272    |
| Sma-1-11573 | NS.000200.1    | - | 217778980 | 217778931 |
| Sma-1-11574 | NW_003038023.1 | + | 239816    | 239865    |
| Sma-1-11575 | NW_003038261.1 | - | 909082    | 909033    |
| Sma-1-11576 | NS.000200.1    | + | 237400107 | 237400156 |
| Sma-1-11577 | NS.000200.1    | - | 324522733 | 324522684 |
| Sma-1-11578 | NW_003026606.1 | - | 93180     | 93131     |
| Sma-1-11579 | NS.000200.1    | - | 307948873 | 307948824 |
| Sma-1-11580 | NW_003038512.1 | - | 135670    | 135621    |
| Sma-1-11581 | NW_003037819.1 | - | 340192    | 340143    |
| Sma-1-11582 | NW_003037912.1 | - | 513409    | 513360    |
| Sma-1-11583 | NS.000200.1    | - | 338692367 | 338692318 |
| Sma-1-11584 | NS.000200.1    | - | 157324984 | 157324935 |
| Sma-1-11585 | NS.000200.1    | - | 51428457  | 51428408  |
| Sma-1-11586 | NW_003027511.1 | + | 345       | 394       |
| Sma-1-11587 | NS.000200.1    | + | 356980198 | 356980247 |
| Sma-1-11588 | NW_003038145.1 | - | 109619    | 109570    |
| Sma-1-11589 | NS.000200.1    | - | 288721042 | 288720993 |
| Sma-1-11590 | NW_003037797.1 | - | 3302726   | 3302677   |
| Sma-1-11591 | NW_003037813.1 | + | 1979912   | 1979961   |
| Sma-1-11592 | NW_003026574.1 | + | 54191     | 54240     |
| Sma-1-11593 | NS.000200.1    | + | 42966775  | 42966824  |
| Sma-1-11594 | NS.000200.1    | + | 301861524 | 301861573 |
| Sma-1-11595 | NS.000200.1    | - | 13730586  | 13730537  |
| Sma-1-11596 | NW_003026465.1 | + | 392556    | 392605    |
| Sma-1-11597 | NW_003037997.1 | - | 74566     | 74517     |
| Sma-1-11598 | NS.000200.1    | + | 207785150 | 207785199 |

|             |                |   |           |           |
|-------------|----------------|---|-----------|-----------|
| Sma-1-11599 | NS_000200.1    | - | 220886008 | 220885959 |
| Sma-1-11600 | NW_003038008.1 | + | 93559     | 93608     |
| Sma-1-11601 | NS_000200.1    | + | 225766655 | 225766704 |
| Sma-1-11602 | NW_003037849.1 | - | 951499    | 951450    |
| Sma-1-11603 | NW_003037896.1 | + | 538809    | 538858    |
| Sma-1-11604 | NW_003037916.1 | + | 405500    | 405549    |
| Sma-1-11605 | NW_003037943.1 | + | 529452    | 529501    |
| Sma-1-11606 | NW_003037943.1 | + | 530270    | 530319    |
| Sma-1-11607 | NS_000200.1    | + | 143459232 | 143459281 |
| Sma-1-11608 | NS_000200.1    | + | 163598911 | 163598960 |
| Sma-1-11609 | NS_000200.1    | + | 187550985 | 187551034 |
| Sma-1-11610 | NS_000200.1    | + | 187551803 | 187551852 |
| Sma-1-11611 | NS_000200.1    | - | 91927772  | 91927723  |
| Sma-1-11612 | NW_003038256.1 | + | 170282    | 170331    |
| Sma-1-11613 | NW_003038242.1 | - | 151719    | 151670    |
| Sma-1-11614 | NW_003037815.1 | + | 347794    | 347843    |
| Sma-1-11615 | NW_003037829.1 | - | 955251    | 955202    |
| Sma-1-11616 | NW_003037945.1 | + | 551540    | 551589    |
| Sma-1-11617 | NW_003037980.1 | + | 976673    | 976722    |
| Sma-1-11618 | NW_003037980.1 | - | 100900    | 100851    |
| Sma-1-11619 | NW_003038011.1 | + | 694065    | 694114    |
| Sma-1-11620 | NW_003038037.1 | - | 217215    | 217166    |
| Sma-1-11621 | NS_000200.1    | + | 45610785  | 45610834  |
| Sma-1-11622 | NS_000200.1    | + | 189653504 | 189653553 |
| Sma-1-11623 | NS_000200.1    | + | 211937535 | 211937584 |
| Sma-1-11624 | NS_000200.1    | + | 228221715 | 228221764 |
| Sma-1-11625 | NS_000200.1    | + | 320904108 | 320904157 |
| Sma-1-11626 | NS_000200.1    | - | 314850865 | 314850816 |
| Sma-1-11627 | NS_000200.1    | - | 250372624 | 250372575 |
| Sma-1-11628 | NS_000200.1    | - | 211061762 | 211061713 |
| Sma-1-11629 | NS_000200.1    | - | 66855789  | 66855740  |
| Sma-1-11630 | NW_003038258.1 | - | 12547     | 12498     |
| Sma-1-11631 | NS_000200.1    | - | 322551057 | 322551008 |
| Sma-1-11632 | NW_003026619.1 | - | 141223    | 141174    |
| Sma-1-11633 | NS_000200.1    | - | 322331967 | 322331918 |
| Sma-1-11634 | NW_003021096.1 | - | 543       | 494       |
| Sma-1-11635 | NS_000200.1    | - | 367927297 | 367927248 |
| Sma-1-11636 | NW_003037977.1 | + | 520828    | 520877    |
| Sma-1-11637 | NS_000200.1    | + | 208806848 | 208806897 |
| Sma-1-11638 | NW_003034337.1 | - | 738       | 689       |
| Sma-1-11639 | NW_003037811.1 | - | 236920    | 236871    |
| Sma-1-11640 | NW_003038064.1 | - | 169949    | 169900    |
| Sma-1-11641 | NS_000200.1    | - | 346558020 | 346557971 |
| Sma-1-11642 | NS_000200.1    | - | 262006526 | 262006477 |
| Sma-1-11643 | NS_000200.1    | - | 38407162  | 38407113  |
| Sma-1-11644 | NW_003037920.1 | + | 198293    | 198342    |
| Sma-1-11645 | NS_000200.1    | + | 169379100 | 169379149 |
| Sma-1-11646 | NW_003037944.1 | - | 234725    | 234676    |
| Sma-1-11647 | NS_000200.1    | - | 188456078 | 188456029 |
| Sma-1-11648 | NW_003038008.1 | + | 24172     | 24221     |
| Sma-1-11649 | NS_000200.1    | + | 225697268 | 225697317 |
| Sma-1-11650 | NW_003038016.1 | + | 529832    | 529881    |

|             |                |   |           |           |
|-------------|----------------|---|-----------|-----------|
| Sma-1-11651 | NS_000200.1    | + | 231646369 | 231646418 |
| Sma-1-11652 | NW_003039127.1 | - | 1927613   | 1927564   |
| Sma-1-11653 | NS_000200.1    | - | 115005112 | 115005063 |
| Sma-1-11654 | NW_003037539.1 | + | 273       | 322       |
| Sma-1-11655 | NS_000200.1    | + | 371306395 | 371306444 |
| Sma-1-11656 | NW_003037797.1 | - | 3675490   | 3675441   |
| Sma-1-11657 | NS_000200.1    | - | 14103350  | 14103301  |
| Sma-1-11658 | NW_003037879.1 | + | 560671    | 560720    |
| Sma-1-11659 | NS_000200.1    | + | 123562927 | 123562976 |
| Sma-1-11660 | NW_003037880.1 | - | 715330    | 715281    |
| Sma-1-11661 | NW_003037880.1 | - | 705690    | 705641    |
| Sma-1-11662 | NS_000200.1    | - | 124398888 | 124398839 |
| Sma-1-11663 | NS_000200.1    | - | 124389248 | 124389199 |
| Sma-1-11664 | NW_003037881.1 | + | 738671    | 738720    |
| Sma-1-11665 | NS_000200.1    | + | 125170462 | 125170511 |
| Sma-1-11666 | NW_003037881.1 | - | 642915    | 642866    |
| Sma-1-11667 | NW_003038035.1 | - | 316628    | 316579    |
| Sma-1-11668 | NS_000200.1    | - | 248178120 | 248178071 |
| Sma-1-11669 | NS_000200.1    | - | 125074706 | 125074657 |
| Sma-1-11670 | NW_003037880.1 | - | 459501    | 459452    |
| Sma-1-11671 | NS_000200.1    | - | 124143059 | 124143010 |
| Sma-1-11672 | NW_003037879.1 | - | 278817    | 278768    |
| Sma-1-11673 | NS_000200.1    | - | 123281073 | 123281024 |
| Sma-1-11674 | NW_003037806.1 | - | 49650     | 49601     |
| Sma-1-11675 | NS_000200.1    | - | 28244864  | 28244815  |
| Sma-1-11676 | NW_003037838.1 | + | 86949     | 86998     |
| Sma-1-11677 | NS_000200.1    | + | 78085512  | 78085561  |
| Sma-1-11678 | NW_003037882.1 | + | 583425    | 583474    |
| Sma-1-11679 | NS_000200.1    | + | 125875099 | 125875148 |
| Sma-1-11680 | NW_003037878.1 | + | 508063    | 508112    |
| Sma-1-11681 | NW_003038141.1 | + | 246601    | 246650    |
| Sma-1-11682 | NS_000200.1    | + | 122561541 | 122561590 |
| Sma-1-11683 | NS_000200.1    | + | 287136580 | 287136629 |
| Sma-1-11684 | NW_003037878.1 | - | 470103    | 470054    |
| Sma-1-11685 | NS_000200.1    | - | 122523581 | 122523532 |
| Sma-1-11686 | NW_003037877.1 | - | 796530    | 796481    |
| Sma-1-11687 | NS_000200.1    | - | 121835092 | 121835043 |
| Sma-1-11688 | NW_003037883.1 | + | 462669    | 462718    |
| Sma-1-11689 | NS_000200.1    | + | 126526392 | 126526441 |
| Sma-1-11690 | NW_003037876.1 | + | 489921    | 489970    |
| Sma-1-11691 | NW_003037802.1 | - | 305151    | 305102    |
| Sma-1-11692 | NW_003037812.1 | + | 1391199   | 1391248   |
| Sma-1-11693 | NW_003037821.1 | - | 859767    | 859718    |
| Sma-1-11694 | NW_003037847.1 | + | 995156    | 995205    |
| Sma-1-11695 | NW_003037882.1 | - | 325087    | 325038    |
| Sma-1-11696 | NW_003037918.1 | + | 2370      | 2419      |
| Sma-1-11697 | NW_003026575.1 | - | 71061     | 71012     |
| Sma-1-11698 | NS_000200.1    | + | 40873938  | 40873987  |
| Sma-1-11699 | NS_000200.1    | + | 89646886  | 89646935  |
| Sma-1-11700 | NS_000200.1    | + | 121035557 | 121035606 |
| Sma-1-11701 | NS_000200.1    | + | 166569360 | 166569409 |
| Sma-1-11702 | NS_000200.1    | - | 302302727 | 302302678 |

|             |                |   |           |           |
|-------------|----------------|---|-----------|-----------|
| Sma-1-11703 | NS.000200.1    | - | 125616761 | 125616712 |
| Sma-1-11704 | NS.000200.1    | - | 54004251  | 54004202  |
| Sma-1-11705 | NS.000200.1    | - | 22307945  | 22307896  |
| Sma-1-11706 | NW.003037875.1 | + | 450334    | 450383    |
| Sma-1-11707 | NS.000200.1    | + | 120479003 | 120479052 |
| Sma-1-11708 | NW.003037871.1 | + | 352077    | 352126    |
| Sma-1-11709 | NS.000200.1    | + | 117799815 | 117799864 |
| Sma-1-11710 | NW.003037870.1 | + | 276656    | 276705    |
| Sma-1-11711 | NS.000200.1    | + | 117150321 | 117150370 |
| Sma-1-11712 | NW.003026472.1 | - | 535430    | 535381    |
| Sma-1-11713 | NW.003037803.1 | - | 555281    | 555232    |
| Sma-1-11714 | NW.003037806.1 | - | 612108    | 612059    |
| Sma-1-11715 | NW.003037853.1 | - | 475881    | 475832    |
| Sma-1-11716 | NW.003037924.1 | - | 288393    | 288344    |
| Sma-1-11717 | NW.003038022.1 | - | 165675    | 165626    |
| Sma-1-11718 | NW.003038230.1 | + | 46512     | 46561     |
| Sma-1-11719 | NW.003038128.1 | + | 310599    | 310648    |
| Sma-1-11720 | NS.000200.1    | + | 281028887 | 281028936 |
| Sma-1-11721 | NS.000200.1    | + | 311332083 | 311332132 |
| Sma-1-11722 | NS.000200.1    | - | 236947422 | 236947373 |
| Sma-1-11723 | NS.000200.1    | - | 235846517 | 235846468 |
| Sma-1-11724 | NS.000200.1    | - | 171995351 | 171995302 |
| Sma-1-11725 | NS.000200.1    | - | 95967932  | 95967883  |
| Sma-1-11726 | NS.000200.1    | - | 28807322  | 28807273  |
| Sma-1-11727 | NS.000200.1    | - | 24055818  | 24055769  |
| Sma-1-11728 | NW.003028446.1 | - | 1270      | 1221      |
| Sma-1-11729 | NW.003038057.1 | + | 288257    | 288306    |
| Sma-1-11730 | NS.000200.1    | + | 259494073 | 259494122 |
| Sma-1-11731 | NS.000200.1    | - | 369657318 | 369657269 |
| Sma-1-11732 | NW.003037865.1 | + | 806342    | 806391    |
| Sma-1-11733 | NS.000200.1    | + | 111228261 | 111228310 |
| Sma-1-11734 | NW.003037824.1 | + | 957167    | 957216    |
| Sma-1-11735 | NW.003037866.1 | + | 1502652   | 1502701   |
| Sma-1-11736 | NS.000200.1    | + | 57888107  | 57888156  |
| Sma-1-11737 | NS.000200.1    | + | 112990451 | 112990500 |
| Sma-1-11738 | NW.003037824.1 | + | 970246    | 970295    |
| Sma-1-11739 | NS.000200.1    | + | 57901186  | 57901235  |
| Sma-1-11740 | NW.003037823.1 | + | 46225     | 46274     |
| Sma-1-11741 | NS.000200.1    | + | 55962844  | 55962893  |
| Sma-1-11742 | NW.003037803.1 | + | 1356705   | 1356754   |
| Sma-1-11743 | NS.000200.1    | + | 24857242  | 24857291  |
| Sma-1-11744 | NW.003037971.1 | + | 401589    | 401638    |
| Sma-1-11745 | NS.000200.1    | + | 202023639 | 202023688 |
| Sma-1-11746 | NW.003021869.1 | - | 372       | 323       |
| Sma-1-11747 | NW.003037977.1 | - | 302394    | 302345    |
| Sma-1-11748 | NW.003038059.1 | + | 215535    | 215584    |
| Sma-1-11749 | NS.000200.1    | + | 260457607 | 260457656 |
| Sma-1-11750 | NS.000200.1    | - | 352002574 | 352002525 |
| Sma-1-11751 | NS.000200.1    | - | 208588414 | 208588365 |
| Sma-1-11752 | NW.003038025.1 | - | 217217    | 217168    |
| Sma-1-11753 | NS.000200.1    | - | 239075462 | 239075413 |
| Sma-1-11754 | NW.003038070.1 | + | 149977    | 150026    |



|             |                |   |           |           |
|-------------|----------------|---|-----------|-----------|
| Sma-1-11755 | NS_000200.1    | + | 264487218 | 264487267 |
| Sma-1-11756 | NW_003038024.1 | - | 277005    | 276956    |
| Sma-1-11757 | NS_000200.1    | - | 238174034 | 238173985 |
| Sma-1-11758 | NW_003037833.1 | + | 96674     | 96723     |
| Sma-1-11759 | NS_000200.1    | + | 72287770  | 72287819  |
| Sma-1-11760 | NW_003027449.1 | - | 1873      | 1824      |
| Sma-1-11761 | NW_003037846.1 | - | 657873    | 657824    |
| Sma-1-11762 | NS_000200.1    | - | 356881049 | 356881000 |
| Sma-1-11763 | NS_000200.1    | - | 88292443  | 88292394  |
| Sma-1-11764 | NW_003035881.1 | - | 331892    | 331843    |
| Sma-1-11765 | NW_003037859.1 | + | 925213    | 925262    |
| Sma-1-11766 | NS_000200.1    | + | 103604054 | 103604103 |
| Sma-1-11767 | NS_000200.1    | - | 341396097 | 341396048 |
| Sma-1-11768 | NW_003029528.1 | - | 301       | 252       |
| Sma-1-11769 | NW_003026594.1 | - | 27213     | 27164     |
| Sma-1-11770 | NS_000200.1    | - | 362218181 | 362218132 |
| Sma-1-11771 | NS_000200.1    | - | 304971583 | 304971534 |
| Sma-1-11772 | NW_003037863.1 | + | 842618    | 842667    |
| Sma-1-11773 | NS_000200.1    | + | 107600985 | 107601034 |
| Sma-1-11774 | NW_003037863.1 | - | 1708637   | 1708588   |
| Sma-1-11775 | NS_000200.1    | - | 108467004 | 108466955 |
| Sma-1-11776 | NW_003037862.1 | - | 83532     | 83483     |
| Sma-1-11777 | NS_000200.1    | - | 105735193 | 105735144 |
| Sma-1-11778 | NW_003037887.1 | + | 360942    | 360991    |
| Sma-1-11779 | NW_003037916.1 | + | 1351308   | 1351357   |
| Sma-1-11780 | NS_000200.1    | + | 130824920 | 130824969 |
| Sma-1-11781 | NS_000200.1    | + | 164544719 | 164544768 |
| Sma-1-11782 | NW_003037888.1 | - | 1481901   | 1481852   |
| Sma-1-11783 | NS_000200.1    | - | 133690393 | 133690344 |
| Sma-1-11784 | NW_003037888.1 | + | 799722    | 799771    |
| Sma-1-11785 | NS_000200.1    | + | 133008214 | 133008263 |
| Sma-1-11786 | NW_003038225.1 | - | 100621    | 100572    |
| Sma-1-11787 | NS_000200.1    | - | 309955285 | 309955236 |
| Sma-1-11788 | NW_003037800.1 | + | 1520945   | 1520994   |
| Sma-1-11789 | NS_000200.1    | + | 20150305  | 20150354  |
| Sma-1-11790 | NW_003037908.1 | + | 916161    | 916210    |
| Sma-1-11791 | NS_000200.1    | + | 153389292 | 153389341 |
| Sma-1-11792 | NW_003037908.1 | - | 964591    | 964542    |
| Sma-1-11793 | NS_000200.1    | - | 153437722 | 153437673 |
| Sma-1-11794 | NW_003037814.1 | - | 268229    | 268180    |
| Sma-1-11795 | NS_000200.1    | - | 43252089  | 43252040  |
| Sma-1-11796 | NW_003038010.1 | - | 554924    | 554875    |
| Sma-1-11797 | NS_000200.1    | - | 227373147 | 227373098 |
| Sma-1-11798 | NW_003037830.1 | - | 1508506   | 1508457   |
| Sma-1-11799 | NS_000200.1    | - | 69398877  | 69398828  |
| Sma-1-11800 | NW_003038023.1 | + | 377311    | 377360    |
| Sma-1-11801 | NS_000200.1    | + | 237537602 | 237537651 |
| Sma-1-11802 | NW_003038036.1 | + | 553743    | 553792    |
| Sma-1-11803 | NS_000200.1    | + | 249487595 | 249487644 |
| Sma-1-11804 | NW_003037912.1 | + | 1335685   | 1335734   |
| Sma-1-11805 | NS_000200.1    | + | 158147260 | 158147309 |
| Sma-1-11806 | NW_003037856.1 | + | 419069    | 419118    |

|             |                |   |           |           |
|-------------|----------------|---|-----------|-----------|
| Sma-1-11807 | NS_000200.1    | + | 99777025  | 99777074  |
| Sma-1-11808 | NW_003037854.1 | + | 700077    | 700126    |
| Sma-1-11809 | NS_000200.1    | + | 97604498  | 97604547  |
| Sma-1-11810 | NW_003038033.1 | + | 382431    | 382480    |
| Sma-1-11811 | NS_000200.1    | + | 246362433 | 246362482 |
| Sma-1-11812 | NW_003020317.1 | - | 292       | 243       |
| Sma-1-11813 | NW_003037915.1 | - | 173461    | 173412    |
| Sma-1-11814 | NS_000200.1    | - | 368991032 | 368990983 |
| Sma-1-11815 | NS_000200.1    | - | 162073447 | 162073398 |
| Sma-1-11816 | NW_003038150.1 | - | 45277     | 45228     |
| Sma-1-11817 | NS_000200.1    | - | 291524015 | 291523966 |
| Sma-1-11818 | NW_003038080.1 | - | 130397    | 130348    |
| Sma-1-11819 | NS_000200.1    | - | 268583007 | 268582958 |
| Sma-1-11820 | NW_003038023.1 | + | 652766    | 652815    |
| Sma-1-11821 | NS_000200.1    | + | 237813057 | 237813106 |
| Sma-1-11822 | NW_003037914.1 | + | 475263    | 475312    |
| Sma-1-11823 | NS_000200.1    | + | 160619513 | 160619562 |
| Sma-1-11824 | NW_003037889.1 | - | 350915    | 350866    |
| Sma-1-11825 | NS_000200.1    | - | 134127405 | 134127356 |
| Sma-1-11826 | NW_003037841.1 | - | 2453245   | 2453196   |
| Sma-1-11827 | NS_000200.1    | - | 85064426  | 85064377  |
| Sma-1-11828 | NW_003037854.1 | + | 1910085   | 1910134   |
| Sma-1-11829 | NS_000200.1    | + | 98814506  | 98814555  |
| Sma-1-11830 | NW_003037799.1 | + | 1038296   | 1038345   |
| Sma-1-11831 | NS_000200.1    | + | 18028650  | 18028699  |
| Sma-1-11832 | NW_003037819.1 | + | 135886    | 135935    |
| Sma-1-11833 | NS_000200.1    | + | 51224151  | 51224200  |
| Sma-1-11834 | NW_003037853.1 | - | 520095    | 520046    |
| Sma-1-11835 | NS_000200.1    | - | 96012146  | 96012097  |
| Sma-1-11836 | NW_003037853.1 | + | 252258    | 252307    |
| Sma-1-11837 | NS_000200.1    | + | 95744309  | 95744358  |
| Sma-1-11838 | NW_003037851.1 | - | 89716     | 89667     |
| Sma-1-11839 | NS_000200.1    | - | 93493026  | 93492977  |
| Sma-1-11840 | NW_003037901.1 | - | 203670    | 203621    |
| Sma-1-11841 | NS_000200.1    | - | 146052131 | 146052082 |
| Sma-1-11842 | NW_003037901.1 | - | 263272    | 263223    |
| Sma-1-11843 | NS_000200.1    | - | 146111733 | 146111684 |
| Sma-1-11844 | NW_003037907.1 | - | 604943    | 604894    |
| Sma-1-11845 | NS_000200.1    | - | 152009432 | 152009383 |
| Sma-1-11846 | NW_003037817.1 | + | 866885    | 866934    |
| Sma-1-11847 | NW_003038023.1 | + | 632720    | 632769    |
| Sma-1-11848 | NS_000200.1    | + | 48249237  | 48249286  |
| Sma-1-11849 | NS_000200.1    | + | 237793011 | 237793060 |
| Sma-1-11850 | NW_003036289.1 | + | 427       | 476       |
| Sma-1-11851 | NS_000200.1    | + | 359572499 | 359572548 |
| Sma-1-11852 | NW_003037813.1 | + | 1095767   | 1095816   |
| Sma-1-11853 | NS_000200.1    | + | 42082630  | 42082679  |
| Sma-1-11854 | NW_003037924.1 | - | 352998    | 352946    |
| Sma-1-11855 | NS_000200.1    | - | 172059956 | 172059904 |
| Sma-1-11856 | NW_003037831.1 | + | 1533311   | 1533360   |
| Sma-1-11857 | NW_003037831.1 | - | 1533150   | 1533101   |
| Sma-1-11858 | NS_000200.1    | + | 70982613  | 70982662  |

|             |                |   |           |           |
|-------------|----------------|---|-----------|-----------|
| Sma-1-11859 | NS.000200.1    | - | 70982452  | 70982403  |
| Sma-1-11860 | NW_003038002.1 | - | 65213     | 65164     |
| Sma-1-11861 | NW_003037845.1 | + | 313252    | 313301    |
| Sma-1-11862 | NS.000200.1    | + | 87315155  | 87315204  |
| Sma-1-11863 | NS.000200.1    | - | 223185422 | 223185373 |
| Sma-1-11864 | NW_003026464.1 | - | 439131    | 439082    |
| Sma-1-11865 | NS.000200.1    | - | 203739440 | 203739391 |
| Sma-1-11866 | NW_003037808.1 | - | 242096    | 242047    |
| Sma-1-11867 | NS.000200.1    | - | 32028733  | 32028684  |
| Sma-1-11868 | NW_003037809.1 | + | 682675    | 682724    |
| Sma-1-11869 | NS.000200.1    | + | 34347139  | 34347188  |
| Sma-1-11870 | NW_003038077.1 | + | 186472    | 186521    |
| Sma-1-11871 | NS.000200.1    | + | 266958112 | 266958161 |
| Sma-1-11872 | NW_003028484.1 | - | 671       | 622       |
| Sma-1-11873 | NW_003028484.1 | - | 267       | 218       |
| Sma-1-11874 | NW_003037809.1 | - | 1980097   | 1980048   |
| Sma-1-11875 | NS.000200.1    | - | 369742458 | 369742409 |
| Sma-1-11876 | NS.000200.1    | - | 369742054 | 369742005 |
| Sma-1-11877 | NS.000200.1    | - | 35644561  | 35644512  |
| Sma-1-11878 | NW_003038139.1 | - | 194575    | 194526    |
| Sma-1-11879 | NS.000200.1    | - | 286234705 | 286234656 |
| Sma-1-11880 | NW_003026199.1 | + | 1204      | 1253      |
| Sma-1-11881 | NW_003039129.1 | - | 81311     | 81262     |
| Sma-1-11882 | NW_003026460.1 | + | 511816    | 511865    |
| Sma-1-11883 | NW_003037796.1 | + | 760616    | 760665    |
| Sma-1-11884 | NW_003037802.1 | - | 1002761   | 1002712   |
| Sma-1-11885 | NW_003038245.1 | - | 1647      | 1598      |
| Sma-1-11886 | NS.000200.1    | + | 8970260   | 8970309   |
| Sma-1-11887 | NS.000200.1    | + | 171034022 | 171034071 |
| Sma-1-11888 | NS.000200.1    | + | 349423473 | 349423522 |
| Sma-1-11889 | NS.000200.1    | - | 315590437 | 315590388 |
| Sma-1-11890 | NS.000200.1    | - | 229036119 | 229036070 |
| Sma-1-11891 | NS.000200.1    | - | 23005555  | 23005506  |
| Sma-1-11892 | NW_003026456.1 | + | 457031    | 457080    |
| Sma-1-11893 | NS.000200.1    | + | 58380167  | 58380216  |
| Sma-1-11894 | NW_003037809.1 | - | 2297291   | 2297242   |
| Sma-1-11895 | NS.000200.1    | - | 35961755  | 35961706  |
| Sma-1-11896 | NW_003037918.1 | - | 521592    | 521543    |
| Sma-1-11897 | NS.000200.1    | - | 167088582 | 167088533 |
| Sma-1-11898 | NW_003037791.1 | - | 251784    | 251735    |
| Sma-1-11899 | NS.000200.1    | - | 381957212 | 381957163 |
| Sma-1-11900 | NW_003037942.1 | + | 160451    | 160500    |
| Sma-1-11901 | NS.000200.1    | + | 185920359 | 185920408 |
| Sma-1-11902 | NW_003037982.1 | + | 198874    | 198923    |
| Sma-1-11903 | NS.000200.1    | + | 213858069 | 213858118 |
| Sma-1-11904 | NW_003037819.1 | + | 340481    | 340530    |
| Sma-1-11905 | NW_003037853.1 | - | 957039    | 956990    |
| Sma-1-11906 | NW_003037926.1 | - | 231660    | 231611    |
| Sma-1-11907 | NS.000200.1    | + | 51428746  | 51428795  |
| Sma-1-11908 | NS.000200.1    | - | 173399930 | 173399881 |
| Sma-1-11909 | NS.000200.1    | - | 96449090  | 96449041  |
| env-86      | AB231864.1     | - | 50263     | 50214     |

|             |                |   |           |           |
|-------------|----------------|---|-----------|-----------|
| Sma-1-11910 | NW_003033999.1 | + | 1310      | 1359      |
| Sma-1-11911 | NS_000200.1    | + | 363395644 | 363395693 |
| Sma-1-11912 | NW_003037939.1 | + | 272005    | 272054    |
| Sma-1-11913 | NW_003037982.1 | - | 1214537   | 1214488   |
| Sma-1-11914 | NS_000200.1    | + | 183141759 | 183141808 |
| Sma-1-11915 | NS_000200.1    | - | 214873732 | 214873683 |
| Sma-1-11916 | NW_003037980.1 | - | 204236    | 204187    |
| Sma-1-11917 | NS_000200.1    | - | 211165098 | 211165049 |
| Sma-1-11918 | NW_003038131.1 | + | 314668    | 314717    |
| Sma-1-11919 | NS_000200.1    | + | 282276512 | 282276561 |
| Sma-1-11920 | NW_003037846.1 | - | 447544    | 447495    |
| Sma-1-11921 | NS_000200.1    | - | 88082114  | 88082065  |
| Sma-1-11922 | NW_003038258.1 | - | 139765    | 139716    |
| Sma-1-11923 | NS_000200.1    | - | 322678275 | 322678226 |
| Sma-1-11924 | NW_003026516.1 | - | 166342    | 166293    |
| Sma-1-11925 | NS_000200.1    | - | 299274639 | 299274590 |
| Sma-1-11926 | NW_003037800.1 | + | 2054320   | 2054369   |
| Sma-1-11927 | NS_000200.1    | + | 20683680  | 20683729  |
| Sma-1-11928 | NW_003037967.1 | + | 185196    | 185245    |
| Sma-1-11929 | NW_003038020.1 | - | 265711    | 265662    |
| Sma-1-11930 | NS_000200.1    | + | 199425167 | 199425216 |
| Sma-1-11931 | NS_000200.1    | - | 234233055 | 234233006 |
| Sma-1-11932 | NW_003038068.1 | - | 304464    | 304415    |
| Sma-1-11933 | NS_000200.1    | - | 263371672 | 263371623 |
| Sma-1-11934 | NW_003037866.1 | - | 445045    | 444996    |
| Sma-1-11935 | NW_003037982.1 | - | 1344873   | 1344824   |
| Sma-1-11936 | NS_000200.1    | - | 215004068 | 215004019 |
| Sma-1-11937 | NS_000200.1    | - | 111932844 | 111932795 |
| Sma-1-11938 | NW_003037970.1 | + | 139089    | 139138    |
| Sma-1-11939 | NS_000200.1    | + | 201195279 | 201195328 |
| Sma-1-11940 | NW_003037974.1 | - | 331128    | 331079    |
| Sma-1-11941 | NS_000200.1    | - | 205006434 | 205006385 |
| Sma-1-11942 | NW_003037992.1 | - | 258039    | 257990    |
| Sma-1-11943 | NS_000200.1    | - | 218099520 | 218099471 |
| Sma-1-11944 | NW_003038042.1 | - | 5512      | 5463      |
| Sma-1-11945 | NS_000200.1    | - | 253951111 | 253951062 |
| Sma-1-11946 | NW_003037818.1 | + | 10135     | 10184     |
| Sma-1-11947 | NS_000200.1    | + | 48725542  | 48725591  |
| Sma-1-11948 | NW_003038251.1 | + | 410461    | 410510    |
| Sma-1-11949 | NS_000200.1    | + | 318742233 | 318742282 |
| Sma-1-11950 | NW_003037834.1 | + | 1162034   | 1162083   |
| Sma-1-11951 | NW_003037850.1 | + | 832326    | 832375    |
| Sma-1-11952 | NW_003037866.1 | + | 790588    | 790637    |
| Sma-1-11953 | NW_003037881.1 | + | 470969    | 471018    |
| Sma-1-11954 | NW_003037924.1 | + | 489303    | 489352    |
| Sma-1-11955 | NW_003038038.1 | + | 919884    | 919933    |
| Sma-1-11956 | NW_003038038.1 | - | 919760    | 919711    |
| Sma-1-11957 | NW_003038128.1 | + | 310190    | 310239    |
| Sma-1-11958 | NW_003038144.1 | - | 14662     | 14613     |
| Sma-1-11959 | NS_000200.1    | + | 74322520  | 74322569  |
| Sma-1-11960 | NS_000200.1    | + | 92818356  | 92818405  |
| Sma-1-11961 | NS_000200.1    | + | 112278387 | 112278436 |

|             |                |   |           |           |
|-------------|----------------|---|-----------|-----------|
| Sma-1-11962 | NS_000200.1    | + | 124902760 | 124902809 |
| Sma-1-11963 | NS_000200.1    | + | 172196261 | 172196310 |
| Sma-1-11964 | NS_000200.1    | + | 252823277 | 252823326 |
| Sma-1-11965 | NS_000200.1    | + | 281028478 | 281028527 |
| Sma-1-11966 | NS_000200.1    | - | 288279038 | 288278989 |
| Sma-1-11967 | NS_000200.1    | - | 252823153 | 252823104 |
| Sma-1-11968 | NW_003024681.1 | - | 922       | 873       |
| Sma-1-11969 | NW_003037806.1 | - | 490502    | 490453    |
| Sma-1-11970 | NW_003038252.1 | + | 377455    | 377504    |
| Sma-1-11971 | NS_000200.1    | + | 319233043 | 319233092 |
| Sma-1-11972 | NS_000200.1    | - | 349103287 | 349103238 |
| Sma-1-11973 | NS_000200.1    | - | 28685716  | 28685667  |
| Sma-1-11974 | NW_003037999.1 | - | 236824    | 236775    |
| Sma-1-11975 | NS_000200.1    | - | 221931378 | 221931329 |
| Sma-1-11976 | NW_003038014.1 | + | 441061    | 441110    |
| Sma-1-11977 | NS_000200.1    | + | 230181750 | 230181799 |
| Sma-1-11978 | NW_003037857.1 | - | 603016    | 602967    |
| Sma-1-11979 | NS_000200.1    | - | 100623373 | 100623324 |
| Sma-1-11980 | NW_003038032.1 | - | 390250    | 390201    |
| Sma-1-11981 | NW_003038084.1 | + | 359632    | 359681    |
| Sma-1-11982 | NS_000200.1    | + | 271374876 | 271374925 |
| Sma-1-11983 | NS_000200.1    | - | 245549410 | 245549361 |
| Sma-1-11984 | NW_003037798.1 | - | 2195806   | 2195757   |
| Sma-1-11985 | NW_003037813.1 | - | 963534    | 963485    |
| Sma-1-11986 | NW_003037841.1 | + | 1352208   | 1352257   |
| Sma-1-11987 | NW_003037853.1 | + | 994182    | 994231    |
| Sma-1-11988 | NW_003038034.1 | + | 792019    | 792068    |
| Sma-1-11989 | NW_003026490.1 | - | 415585    | 415536    |
| Sma-1-11990 | NW_003038102.1 | - | 45191     | 45142     |
| Sma-1-11991 | NS_000200.1    | + | 83963389  | 83963438  |
| Sma-1-11992 | NS_000200.1    | + | 96486233  | 96486282  |
| Sma-1-11993 | NS_000200.1    | + | 247733775 | 247733824 |
| Sma-1-11994 | NS_000200.1    | - | 274724137 | 274724088 |
| Sma-1-11995 | NS_000200.1    | - | 268047301 | 268047252 |
| Sma-1-11996 | NS_000200.1    | - | 41950397  | 41950348  |
| Sma-1-11997 | NS_000200.1    | - | 16454964  | 16454915  |
| Sma-1-11998 | NW_003037771.1 | + | 55041     | 55090     |
| Sma-1-11999 | NS_000200.1    | + | 378355947 | 378355996 |
| Sma-1-12000 | NW_003037797.1 | - | 2882915   | 2882866   |
| Sma-1-12001 | NS_000200.1    | - | 13310775  | 13310726  |
| Sma-1-12002 | NW_003037913.1 | - | 40456     | 40407     |
| Sma-1-12003 | NS_000200.1    | - | 158604207 | 158604158 |
| Sma-1-12004 | NW_003038001.1 | + | 392324    | 392373    |
| Sma-1-12005 | NS_000200.1    | + | 223101885 | 223101934 |
| Sma-1-12006 | NW_003037793.1 | - | 1588518   | 1588469   |
| Sma-1-12007 | NW_003037795.1 | - | 657716    | 657667    |
| Sma-1-12008 | NW_003037823.1 | - | 198352    | 198303    |
| Sma-1-12009 | NS_000200.1    | - | 56114971  | 56114922  |
| Sma-1-12010 | NS_000200.1    | - | 7048599   | 7048550   |
| Sma-1-12011 | NS_000200.1    | - | 1588518   | 1588469   |
| Sma-1-12012 | NW_003038148.1 | - | 502989    | 502940    |
| Sma-1-12013 | NS_000200.1    | - | 290576973 | 290576924 |

|             |                |   |           |           |
|-------------|----------------|---|-----------|-----------|
| Sma-1-12014 | NW_003028832.1 | - | 104       | 55        |
| Sma-1-12015 | NW_003029671.1 | + | 296       | 345       |
| Sma-1-12016 | NW_003030625.1 | - | 131       | 82        |
| Sma-1-12017 | NW_003031026.1 | - | 1543      | 1494      |
| Sma-1-12018 | NW_003037929.1 | + | 54035     | 54084     |
| Sma-1-12019 | NW_003037937.1 | - | 232749    | 232700    |
| Sma-1-12020 | NW_003037800.1 | + | 1870369   | 1870418   |
| Sma-1-12021 | NW_003037810.1 | - | 1217791   | 1217742   |
| Sma-1-12022 | NW_003037813.1 | - | 1190613   | 1190564   |
| Sma-1-12023 | NW_003037817.1 | - | 861019    | 860970    |
| Sma-1-12024 | NW_003037845.1 | + | 629481    | 629530    |
| Sma-1-12025 | NW_003037854.1 | - | 1467776   | 1467727   |
| Sma-1-12026 | NW_003037866.1 | + | 251888    | 251937    |
| Sma-1-12027 | NW_003037871.1 | + | 118505    | 118554    |
| Sma-1-12028 | NW_003037881.1 | - | 318355    | 318306    |
| Sma-1-12029 | NW_003037887.1 | - | 117812    | 117763    |
| Sma-1-12030 | NW_003037891.1 | + | 1331941   | 1331990   |
| Sma-1-12031 | NW_003037916.1 | + | 825727    | 825776    |
| Sma-1-12032 | NW_003037916.1 | + | 891413    | 891462    |
| Sma-1-12033 | NW_003038008.1 | - | 690449    | 690400    |
| Sma-1-12034 | NW_003038012.1 | + | 354647    | 354696    |
| Sma-1-12035 | NW_003038012.1 | - | 193348    | 193299    |
| Sma-1-12036 | NW_003026487.1 | + | 33345     | 33394     |
| Sma-1-12037 | NW_003038055.1 | - | 36073     | 36024     |
| Sma-1-12038 | NW_003038087.1 | - | 390969    | 390920    |
| Sma-1-12039 | NS_000200.1    | + | 20499729  | 20499778  |
| Sma-1-12040 | NS_000200.1    | + | 87631384  | 87631433  |
| Sma-1-12041 | NS_000200.1    | + | 111739687 | 111739736 |
| Sma-1-12042 | NS_000200.1    | + | 117566243 | 117566292 |
| Sma-1-12043 | NS_000200.1    | + | 139213219 | 139213268 |
| Sma-1-12044 | NS_000200.1    | + | 164019138 | 164019187 |
| Sma-1-12045 | NS_000200.1    | + | 164084824 | 164084873 |
| Sma-1-12046 | NS_000200.1    | + | 175294813 | 175294862 |
| Sma-1-12047 | NS_000200.1    | + | 228678586 | 228678635 |
| Sma-1-12048 | NS_000200.1    | + | 260944039 | 260944088 |
| Sma-1-12049 | NS_000200.1    | + | 366389170 | 366389219 |
| Sma-1-12050 | NS_000200.1    | - | 370046279 | 370046230 |
| Sma-1-12051 | NS_000200.1    | - | 366599671 | 366599622 |
| Sma-1-12052 | NS_000200.1    | - | 325552718 | 325552669 |
| Sma-1-12053 | NS_000200.1    | - | 273419370 | 273419321 |
| Sma-1-12054 | NS_000200.1    | - | 258735395 | 258735346 |
| Sma-1-12055 | NS_000200.1    | - | 228517287 | 228517238 |
| Sma-1-12056 | NS_000200.1    | - | 226363545 | 226363496 |
| Sma-1-12057 | NS_000200.1    | - | 181432658 | 181432609 |
| Sma-1-12058 | NS_000200.1    | - | 130581790 | 130581741 |
| Sma-1-12059 | NS_000200.1    | - | 124750146 | 124750097 |
| Sma-1-12060 | NS_000200.1    | - | 98372197  | 98372148  |
| Sma-1-12061 | NS_000200.1    | - | 48243371  | 48243322  |
| Sma-1-12062 | NS_000200.1    | - | 42177476  | 42177427  |
| Sma-1-12063 | NS_000200.1    | - | 37822313  | 37822264  |
| Sma-1-12064 | NW_003037891.1 | + | 166409    | 166458    |
| Sma-1-12065 | NS_000200.1    | + | 138047687 | 138047736 |

|             |                |   |           |           |
|-------------|----------------|---|-----------|-----------|
| Sma-1-12066 | NW_003037891.1 | - | 251711    | 251662    |
| Sma-1-12067 | NS_000200.1    | - | 138132989 | 138132940 |
| Sma-1-12068 | NW_003037847.1 | - | 122909    | 122860    |
| Sma-1-12069 | NS_000200.1    | - | 88774639  | 88774590  |
| Sma-1-12070 | NW_003038442.1 | - | 14487     | 14435     |
| Sma-1-12071 | NS_000200.1    | - | 329870540 | 329870488 |
| Sma-1-12072 | NW_003037883.1 | + | 452704    | 452753    |
| Sma-1-12073 | NW_003037945.1 | - | 406309    | 406260    |
| Sma-1-12074 | NW_003038094.1 | + | 19068     | 19117     |
| Sma-1-12075 | NS_000200.1    | + | 126516427 | 126516476 |
| Sma-1-12076 | NS_000200.1    | + | 274062382 | 274062431 |
| Sma-1-12077 | NS_000200.1    | - | 189508273 | 189508224 |
| Sma-1-12078 | NW_003037896.1 | - | 154775    | 154726    |
| Sma-1-12079 | NW_003038116.1 | + | 95245     | 95294     |
| Sma-1-12080 | NS_000200.1    | + | 277310523 | 277310572 |
| Sma-1-12081 | NS_000200.1    | - | 143075198 | 143075149 |
| Sma-1-12082 | NW_003038044.1 | + | 123126    | 123175    |
| Sma-1-12083 | NS_000200.1    | + | 254747908 | 254747957 |
| Sma-1-12084 | NW_003037894.1 | - | 520807    | 520758    |
| Sma-1-12085 | NW_003037961.1 | + | 344017    | 344066    |
| Sma-1-12086 | NS_000200.1    | + | 195968259 | 195968308 |
| Sma-1-12087 | NS_000200.1    | - | 142417380 | 142417331 |
| Sma-1-12088 | NW_003037843.1 | - | 257895    | 257846    |
| Sma-1-12089 | NS_000200.1    | - | 85897202  | 85897153  |
| Sma-1-12090 | NW_003037839.1 | - | 1124400   | 1124351   |
| Sma-1-12091 | NS_000200.1    | - | 80082550  | 80082501  |
| Sma-1-12092 | NW_003037904.1 | + | 287086    | 287135    |
| Sma-1-12093 | NS_000200.1    | + | 149001585 | 149001634 |
| Sma-1-12094 | NW_003037904.1 | + | 511993    | 512042    |
| Sma-1-12095 | NW_003038037.1 | - | 1008195   | 1008146   |
| Sma-1-12096 | NS_000200.1    | + | 149226492 | 149226541 |
| Sma-1-12097 | NS_000200.1    | - | 251163604 | 251163555 |
| Sma-1-12098 | NW_003037818.1 | - | 1943573   | 1943524   |
| Sma-1-12099 | NS_000200.1    | - | 50658980  | 50658931  |
| Sma-1-12100 | NW_003037831.1 | + | 1138281   | 1138330   |
| Sma-1-12101 | NW_003026517.1 | - | 437205    | 437156    |
| Sma-1-12102 | NS_000200.1    | + | 70587583  | 70587632  |
| Sma-1-12103 | NS_000200.1    | - | 300043214 | 300043165 |
| Sma-1-12104 | NW_003023040.1 | - | 2512      | 2463      |
| Sma-1-12105 | NS_000200.1    | - | 372139354 | 372139305 |
| Sma-1-12106 | NW_003037912.1 | - | 1339979   | 1339930   |
| Sma-1-12107 | NS_000200.1    | - | 158151554 | 158151505 |
| Sma-1-12108 | NW_003025649.1 | + | 141       | 190       |
| Sma-1-12109 | NW_003037880.1 | + | 522416    | 522465    |
| Sma-1-12110 | NW_003037942.1 | + | 649425    | 649474    |
| Sma-1-12111 | NS_000200.1    | + | 124205974 | 124206023 |
| Sma-1-12112 | NS_000200.1    | + | 186409333 | 186409382 |
| Sma-1-12113 | NS_000200.1    | + | 356299602 | 356299651 |
| Sma-1-12114 | NW_003038083.1 | - | 79454     | 79405     |
| Sma-1-12115 | NS_000200.1    | - | 270322791 | 270322742 |
| Sma-1-12116 | NW_003026458.1 | + | 212618    | 212667    |
| Sma-1-12117 | NS_000200.1    | + | 102080848 | 102080897 |

|             |                |   |           |           |
|-------------|----------------|---|-----------|-----------|
| Sma-1-12118 | NW_003029652.1 | + | 74        | 123       |
| Sma-1-12119 | NW_003037977.1 | - | 713818    | 713769    |
| Sma-1-12120 | NW_003038019.1 | + | 36086     | 36135     |
| Sma-1-12121 | NW_003038026.1 | + | 593009    | 593058    |
| Sma-1-12122 | NS_000200.1    | + | 233352904 | 233352953 |
| Sma-1-12123 | NS_000200.1    | + | 240100770 | 240100819 |
| Sma-1-12124 | NS_000200.1    | + | 366353414 | 366353463 |
| Sma-1-12125 | NS_000200.1    | - | 208999838 | 208999789 |
| Sma-1-12126 | NW_003037800.1 | - | 1388204   | 1388155   |
| Sma-1-12127 | NS_000200.1    | - | 20017564  | 20017515  |
| Sma-1-12128 | NW_003037810.1 | + | 292684    | 292733    |
| Sma-1-12129 | NS_000200.1    | + | 36897206  | 36897255  |
| Sma-1-12130 | NW_003034094.1 | + | 2309      | 2358      |
| Sma-1-12131 | NS_000200.1    | + | 363724257 | 363724306 |
| Sma-1-12132 | NW_003026510.1 | - | 56349     | 56300     |
| Sma-1-12133 | NS_000200.1    | - | 283496530 | 283496481 |
| Sma-1-12134 | NW_003037939.1 | + | 605910    | 605959    |
| Sma-1-12135 | NS_000200.1    | + | 183475664 | 183475713 |
| Sma-1-12136 | NW_003037995.1 | + | 274630    | 274679    |
| Sma-1-12137 | NW_003038008.1 | - | 210965    | 210916    |
| Sma-1-12138 | NS_000200.1    | + | 219964398 | 219964447 |
| Sma-1-12139 | NS_000200.1    | - | 225884061 | 225884012 |
| Sma-1-12140 | NW_003038131.1 | + | 40479     | 40528     |
| Sma-1-12141 | NS_000200.1    | + | 282002323 | 282002372 |
| Sma-1-12142 | NW_003026515.1 | + | 163590    | 163639    |
| Sma-1-12143 | NW_003026517.1 | - | 283101    | 283052    |
| Sma-1-12144 | NW_003038152.1 | + | 265861    | 265910    |
| Sma-1-12145 | NS_000200.1    | + | 290808001 | 290808050 |
| Sma-1-12146 | NS_000200.1    | + | 292871585 | 292871634 |
| Sma-1-12147 | NS_000200.1    | - | 299889110 | 299889061 |
| Sma-1-12148 | NW_003035870.1 | - | 11140     | 11091     |
| Sma-1-12149 | NW_003037862.1 | + | 83761     | 83810     |
| Sma-1-12150 | NW_003037918.1 | - | 1457746   | 1457697   |
| Sma-1-12151 | NS_000200.1    | + | 105735422 | 105735471 |
| Sma-1-12152 | NS_000200.1    | - | 335376429 | 335376380 |
| Sma-1-12153 | NS_000200.1    | - | 168024736 | 168024687 |
| Sma-1-12154 | NW_003037800.1 | + | 1310260   | 1310309   |
| Sma-1-12155 | NS_000200.1    | + | 19939620  | 19939669  |
| Sma-1-12156 | NW_003037911.1 | - | 550066    | 550017    |
| Sma-1-12157 | NS_000200.1    | - | 156337419 | 156337370 |
| Sma-1-12158 | NW_003037797.1 | + | 1465620   | 1465669   |
| Sma-1-12159 | NS_000200.1    | + | 11893480  | 11893529  |
| Sma-1-12160 | NW_003037799.1 | + | 1191413   | 1191462   |
| Sma-1-12161 | NS_000200.1    | + | 18181767  | 18181816  |
| Sma-1-12162 | NW_003037928.1 | - | 349837    | 349788    |
| Sma-1-12163 | NS_000200.1    | - | 174673790 | 174673741 |
| Sma-1-12164 | NW_003037803.1 | + | 83386     | 83435     |
| Sma-1-12165 | NS_000200.1    | + | 23583923  | 23583972  |
| Sma-1-12166 | NW_003037817.1 | - | 1208172   | 1208123   |
| Sma-1-12167 | NS_000200.1    | - | 48590524  | 48590475  |
| Sma-1-12168 | NW_003037918.1 | + | 1786313   | 1786362   |
| Sma-1-12169 | NS_000200.1    | + | 168353303 | 168353352 |



|             |                |   |           |           |
|-------------|----------------|---|-----------|-----------|
| Sma-1-12170 | NW_003037805.1 | - | 756680    | 756631    |
| Sma-1-12171 | NW_003037827.1 | - | 738036    | 737987    |
| Sma-1-12172 | NS_000200.1    | - | 63360177  | 63360128  |
| Sma-1-12173 | NS_000200.1    | - | 27314524  | 27314475  |
| Sma-1-12174 | NW_003037926.1 | + | 75334     | 75383     |
| Sma-1-12175 | NS_000200.1    | + | 173243604 | 173243653 |
| Sma-1-12176 | NW_003037935.1 | - | 100503    | 100454    |
| Sma-1-12177 | NS_000200.1    | - | 179517038 | 179516989 |
| Sma-1-12178 | NW_003037937.1 | + | 124189    | 124238    |
| Sma-1-12179 | NW_003037798.1 | - | 2389401   | 2389352   |
| Sma-1-12180 | NW_003037810.1 | - | 208959    | 208910    |
| Sma-1-12181 | NW_003037813.1 | - | 929753    | 929704    |
| Sma-1-12182 | NW_003037827.1 | + | 195205    | 195254    |
| Sma-1-12183 | NW_003037827.1 | + | 734432    | 734481    |
| Sma-1-12184 | NW_003037939.1 | - | 609177    | 609128    |
| Sma-1-12185 | NW_003037941.1 | + | 957158    | 957207    |
| Sma-1-12186 | NW_003038017.1 | - | 174133    | 174084    |
| Sma-1-12187 | NW_003038025.1 | - | 258177    | 258128    |
| Sma-1-12188 | NW_003038028.1 | - | 700675    | 700626    |
| Sma-1-12189 | NW_003038252.1 | - | 167787    | 167738    |
| Sma-1-12190 | NW_003026517.1 | - | 428410    | 428361    |
| Sma-1-12191 | NS_000200.1    | + | 62817346  | 62817395  |
| Sma-1-12192 | NS_000200.1    | + | 63356573  | 63356622  |
| Sma-1-12193 | NS_000200.1    | + | 181324098 | 181324147 |
| Sma-1-12194 | NS_000200.1    | + | 185691632 | 185691681 |
| Sma-1-12195 | NS_000200.1    | - | 319023375 | 319023326 |
| Sma-1-12196 | NS_000200.1    | - | 300034419 | 300034370 |
| Sma-1-12197 | NS_000200.1    | - | 242008249 | 242008200 |
| Sma-1-12198 | NS_000200.1    | - | 239116422 | 239116373 |
| Sma-1-12199 | NS_000200.1    | - | 231940164 | 231940115 |
| Sma-1-12200 | NS_000200.1    | - | 183478931 | 183478882 |
| Sma-1-12201 | NS_000200.1    | - | 41916616  | 41916567  |
| Sma-1-12202 | NS_000200.1    | - | 36813481  | 36813432  |
| Sma-1-12203 | NS_000200.1    | - | 16648559  | 16648510  |
| Sma-1-12204 | NW_003037937.1 | + | 196473    | 196522    |
| Sma-1-12205 | NS_000200.1    | + | 181396382 | 181396431 |
| Sma-1-12206 | NW_003038033.1 | - | 249504    | 249455    |
| Sma-1-12207 | NS_000200.1    | - | 246229506 | 246229457 |
| Sma-1-12208 | NW_003029920.1 | + | 1218      | 1267      |
| Sma-1-12209 | NW_003037798.1 | + | 1943255   | 1943304   |
| Sma-1-12210 | NW_003037803.1 | - | 796927    | 796878    |
| Sma-1-12211 | NW_003037807.1 | - | 377673    | 377624    |
| Sma-1-12212 | NW_003037831.1 | + | 850648    | 850697    |
| Sma-1-12213 | NW_003037909.1 | + | 311923    | 311972    |
| Sma-1-12214 | NW_003037909.1 | - | 362979    | 362930    |
| Sma-1-12215 | NW_003037961.1 | + | 14019     | 14068     |
| Sma-1-12216 | NW_003037964.1 | + | 418340    | 418389    |
| Sma-1-12217 | NW_003038011.1 | + | 487461    | 487510    |
| Sma-1-12218 | NS_000200.1    | + | 16202413  | 16202462  |
| Sma-1-12219 | NS_000200.1    | + | 70299950  | 70299999  |
| Sma-1-12220 | NS_000200.1    | + | 153853572 | 153853621 |
| Sma-1-12221 | NS_000200.1    | + | 195638261 | 195638310 |

|             |                |   |           |           |
|-------------|----------------|---|-----------|-----------|
| Sma-1-12222 | NS.000200.1    | + | 198019862 | 198019911 |
| Sma-1-12223 | NS.000200.1    | + | 228015111 | 228015160 |
| Sma-1-12224 | NS.000200.1    | + | 376793179 | 376793228 |
| Sma-1-12225 | NS.000200.1    | - | 153904628 | 153904579 |
| Sma-1-12226 | NS.000200.1    | - | 30639189  | 30639140  |
| Sma-1-12227 | NS.000200.1    | - | 24297464  | 24297415  |
| Sma-1-12228 | NW.003038502.1 | - | 102979    | 102930    |
| Sma-1-12229 | NS.000200.1    | - | 335102024 | 335101975 |
| Sma-1-12230 | NW.003038083.1 | - | 52413     | 52364     |
| Sma-1-12231 | NS.000200.1    | - | 270295750 | 270295701 |
| Sma-1-12232 | NW.003026472.1 | - | 291908    | 291859    |
| Sma-1-12233 | NS.000200.1    | - | 236703900 | 236703851 |
| Sma-1-12234 | NW.003038733.1 | + | 5540      | 5589      |
| Sma-1-12235 | NS.000200.1    | + | 348987333 | 348987382 |
| Sma-1-12236 | NW.003038066.1 | - | 342470    | 342421    |
| Sma-1-12237 | NS.000200.1    | - | 262811414 | 262811365 |
| Sma-1-12238 | NW.003038023.1 | - | 731401    | 731352    |
| Sma-1-12239 | NS.000200.1    | - | 237891692 | 237891643 |
| Sma-1-12240 | NW.003037798.1 | - | 1533727   | 1533678   |
| Sma-1-12241 | NS.000200.1    | - | 15792885  | 15792836  |
| Sma-1-12242 | NW.003026470.1 | + | 211070    | 211119    |
| Sma-1-12243 | NS.000200.1    | + | 219335039 | 219335088 |
| Sma-1-12244 | NW.003037800.1 | + | 632571    | 632620    |
| Sma-1-12245 | NS.000200.1    | + | 19261931  | 19261980  |
| Sma-1-12246 | NW.003037747.1 | + | 16805     | 16854     |
| Sma-1-12247 | NW.003038511.1 | - | 1354      | 1305      |
| Sma-1-12248 | NW.003026471.1 | + | 191436    | 191485    |
| Sma-1-12249 | NW.003037801.1 | - | 555650    | 555601    |
| Sma-1-12250 | NW.003037810.1 | - | 718387    | 718338    |
| Sma-1-12251 | NW.003037814.1 | + | 386365    | 386414    |
| Sma-1-12252 | NW.003037832.1 | - | 480963    | 480914    |
| Sma-1-12253 | NW.003037915.1 | + | 1093720   | 1093769   |
| Sma-1-12254 | NW.003038133.1 | - | 267440    | 267391    |
| Sma-1-12255 | NW.003038187.1 | + | 115656    | 115705    |
| Sma-1-12256 | NS.000200.1    | + | 43370225  | 43370274  |
| Sma-1-12257 | NS.000200.1    | + | 162993706 | 162993755 |
| Sma-1-12258 | NS.000200.1    | + | 222303669 | 222303718 |
| Sma-1-12259 | NS.000200.1    | + | 302067514 | 302067563 |
| Sma-1-12260 | NS.000200.1    | + | 376942004 | 376942053 |
| Sma-1-12261 | NS.000200.1    | - | 338346566 | 338346517 |
| Sma-1-12262 | NS.000200.1    | - | 283139622 | 283139573 |
| Sma-1-12263 | NS.000200.1    | - | 71690394  | 71690345  |
| Sma-1-12264 | NS.000200.1    | - | 37322909  | 37322860  |
| Sma-1-12265 | NS.000200.1    | - | 21645130  | 21645081  |
| Sma-1-12266 | NW.003037946.1 | - | 81220     | 81171     |
| Sma-1-12267 | NS.000200.1    | - | 190775080 | 190775031 |
| Sma-1-12268 | NW.003037970.1 | + | 106448    | 106497    |
| Sma-1-12269 | NS.000200.1    | + | 201162638 | 201162687 |
| Sma-1-12270 | NW.003037799.1 | + | 1174156   | 1174205   |
| Sma-1-12271 | NW.003037918.1 | - | 2164475   | 2164426   |
| Sma-1-12272 | NS.000200.1    | + | 18164510  | 18164559  |
| Sma-1-12273 | NS.000200.1    | - | 168731465 | 168731416 |

|             |                |   |           |           |
|-------------|----------------|---|-----------|-----------|
| Sma-1-12274 | NW_003039129.1 | - | 408983    | 408934    |
| Sma-1-12275 | NS_000200.1    | - | 229363791 | 229363742 |
| Sma-1-12276 | NW_003037881.1 | - | 639228    | 639179    |
| Sma-1-12277 | NS_000200.1    | - | 125071019 | 125070970 |
| Sma-1-12278 | NW_003037982.1 | - | 1249333   | 1249284   |
| Sma-1-12279 | NS_000200.1    | - | 214908528 | 214908479 |
| Sma-1-12280 | NW_003037982.1 | + | 1329433   | 1329482   |
| Sma-1-12281 | NS_000200.1    | + | 214988628 | 214988677 |
| Sma-1-12282 | NW_003037999.1 | - | 340378    | 340329    |
| Sma-1-12283 | NS_000200.1    | - | 222034932 | 222034883 |
| Sma-1-12284 | NW_003038132.1 | + | 411341    | 411390    |
| Sma-1-12285 | NS_000200.1    | + | 282831811 | 282831860 |
| Sma-1-12286 | NW_003020690.1 | - | 897       | 848       |
| Sma-1-12287 | NW_003038261.1 | + | 200733    | 200782    |
| Sma-1-12288 | NS_000200.1    | + | 323814384 | 323814433 |
| Sma-1-12289 | NS_000200.1    | - | 360670296 | 360670247 |
| Sma-1-12290 | NW_003038240.1 | + | 48647     | 48696     |
| Sma-1-12291 | NS_000200.1    | + | 314187578 | 314187627 |
| Sma-1-12292 | NW_003037851.1 | - | 259962    | 259913    |
| Sma-1-12293 | NS_000200.1    | - | 93663272  | 93663223  |
| Sma-1-12294 | NW_003038033.1 | + | 325626    | 325675    |
| Sma-1-12295 | NS_000200.1    | + | 246305628 | 246305677 |
| Sma-1-12296 | NW_003038037.1 | + | 749219    | 749268    |
| Sma-1-12297 | NS_000200.1    | + | 250904628 | 250904677 |
| Sma-1-12298 | NW_003037885.1 | - | 811541    | 811492    |
| Sma-1-12299 | NS_000200.1    | - | 128909488 | 128909439 |
| Sma-1-12300 | NW_003037913.1 | - | 956112    | 956063    |
| Sma-1-12301 | NW_003037913.1 | - | 951941    | 951892    |
| Sma-1-12302 | NS_000200.1    | - | 159519863 | 159519814 |
| Sma-1-12303 | NS_000200.1    | - | 159515692 | 159515643 |
| Sma-1-12304 | NW_003037796.1 | - | 1526798   | 1526749   |
| Sma-1-12305 | NS_000200.1    | - | 9736442   | 9736393   |
| Sma-1-12306 | NW_003037873.1 | - | 220744    | 220695    |
| Sma-1-12307 | NW_003037795.1 | - | 641090    | 641041    |
| Sma-1-12308 | NS_000200.1    | - | 118959872 | 118959823 |
| Sma-1-12309 | NS_000200.1    | - | 7031973   | 7031924   |
| Sma-1-12310 | NW_003037891.1 | + | 1094117   | 1094166   |
| Sma-1-12311 | NS_000200.1    | + | 138975395 | 138975444 |
| Sma-1-12312 | NW_003037847.1 | + | 312470    | 312519    |
| Sma-1-12313 | NS_000200.1    | + | 88964200  | 88964249  |
| Sma-1-12314 | NW_003037846.1 | + | 373843    | 373892    |
| Sma-1-12315 | NS_000200.1    | + | 88008413  | 88008462  |
| Sma-1-12316 | NW_003037840.1 | + | 1302121   | 1302170   |
| Sma-1-12317 | NS_000200.1    | + | 81925445  | 81925494  |
| Sma-1-12318 | NW_003037834.1 | + | 872343    | 872392    |
| Sma-1-12319 | NS_000200.1    | + | 74032829  | 74032878  |
| Sma-1-12320 | NW_003038252.1 | - | 302071    | 302022    |
| Sma-1-12321 | NS_000200.1    | - | 319157659 | 319157610 |
| Sma-1-12322 | NW_003037829.1 | + | 1860869   | 1860918   |
| Sma-1-12323 | NS_000200.1    | + | 67761407  | 67761456  |
| Sma-1-12324 | NW_003037833.1 | + | 101066    | 101115    |
| Sma-1-12325 | NS_000200.1    | + | 72292162  | 72292211  |

|             |                |   |           |           |
|-------------|----------------|---|-----------|-----------|
| Sma-1-12326 | NW_003037808.1 | - | 91429     | 91380     |
| Sma-1-12327 | NS_000200.1    | - | 31878066  | 31878017  |
| Sma-1-12328 | NW_003038509.1 | + | 137232    | 137281    |
| Sma-1-12329 | NS_000200.1    | + | 337769684 | 337769733 |
| Sma-1-12330 | NW_003037863.1 | + | 46237     | 46286     |
| Sma-1-12331 | NS_000200.1    | + | 106804604 | 106804653 |
| Sma-1-12332 | NW_003037924.1 | - | 413217    | 413168    |
| Sma-1-12333 | NS_000200.1    | - | 172120175 | 172120126 |
| Sma-1-12334 | NW_003037798.1 | - | 1873563   | 1873514   |
| Sma-1-12335 | NS_000200.1    | - | 16132721  | 16132672  |
| Sma-1-12336 | NW_003038489.1 | - | 109457    | 109408    |
| Sma-1-12337 | NS_000200.1    | - | 333821740 | 333821691 |
| Sma-1-12338 | NW_003031885.1 | + | 737       | 786       |
| Sma-1-12339 | NW_003035682.1 | + | 50347     | 50396     |
| Sma-1-12340 | NW_003037787.1 | + | 186032    | 186081    |
| Sma-1-12341 | NW_003037797.1 | - | 1803150   | 1803101   |
| Sma-1-12342 | NW_003037807.1 | + | 1449519   | 1449568   |
| Sma-1-12343 | NW_003037868.1 | + | 22515     | 22564     |
| Sma-1-12344 | NW_003037884.1 | - | 1127242   | 1127193   |
| Sma-1-12345 | NW_003037893.1 | + | 220380    | 220429    |
| Sma-1-12346 | NW_003037902.1 | - | 607664    | 607615    |
| Sma-1-12347 | NW_003037911.1 | + | 591072    | 591121    |
| Sma-1-12348 | NW_003037914.1 | - | 193117    | 193068    |
| Sma-1-12349 | NW_003037924.1 | - | 531347    | 531298    |
| Sma-1-12350 | NW_003037958.1 | + | 353197    | 353246    |
| Sma-1-12351 | NW_003037977.1 | - | 967003    | 966954    |
| Sma-1-12352 | NS_000200.1    | + | 31711035  | 31711084  |
| Sma-1-12353 | NS_000200.1    | + | 115994227 | 115994276 |
| Sma-1-12354 | NS_000200.1    | + | 141334690 | 141334739 |
| Sma-1-12355 | NS_000200.1    | + | 156378425 | 156378474 |
| Sma-1-12356 | NS_000200.1    | + | 195017381 | 195017430 |
| Sma-1-12357 | NS_000200.1    | + | 332672400 | 332672449 |
| Sma-1-12358 | NS_000200.1    | + | 367208477 | 367208526 |
| Sma-1-12359 | NS_000200.1    | + | 380434201 | 380434250 |
| Sma-1-12360 | NS_000200.1    | - | 209253023 | 209252974 |
| Sma-1-12361 | NS_000200.1    | - | 172238305 | 172238256 |
| Sma-1-12362 | NS_000200.1    | - | 160337367 | 160337318 |
| Sma-1-12363 | NS_000200.1    | - | 147362898 | 147362849 |
| Sma-1-12364 | NS_000200.1    | - | 127906907 | 127906858 |
| Sma-1-12365 | NS_000200.1    | - | 12231010  | 12230961  |
| Sma-1-12366 | NW_003038072.1 | + | 73197     | 73246     |
| Sma-1-12367 | NS_000200.1    | + | 265235425 | 265235474 |
| Sma-1-12368 | NW_003037918.1 | + | 2188336   | 2188385   |
| Sma-1-12369 | NS_000200.1    | + | 168755326 | 168755375 |
| Sma-1-12370 | NW_003037906.1 | + | 513559    | 513608    |
| Sma-1-12371 | NS_000200.1    | + | 150821338 | 150821387 |
| Sma-1-12372 | NW_003037876.1 | - | 172254    | 172205    |
| Sma-1-12373 | NW_003037807.1 | - | 170377    | 170328    |
| Sma-1-12374 | NW_003038037.1 | - | 178829    | 178780    |
| Sma-1-12375 | NS_000200.1    | - | 250334238 | 250334189 |
| Sma-1-12376 | NS_000200.1    | - | 120717890 | 120717841 |
| Sma-1-12377 | NS_000200.1    | - | 30431893  | 30431844  |

|             |                |   |           |           |
|-------------|----------------|---|-----------|-----------|
| Sma-1-12378 | NW_003037794.1 | + | 278684    | 278733    |
| Sma-1-12379 | NS_000200.1    | + | 4458279   | 4458328   |
| Sma-1-12380 | NW_003037939.1 | + | 494465    | 494514    |
| Sma-1-12381 | NS_000200.1    | + | 183364219 | 183364268 |
| Sma-1-12382 | NW_003037881.1 | + | 828639    | 828688    |
| Sma-1-12383 | NW_003037942.1 | + | 1126150   | 1126199   |
| Sma-1-12384 | NS_000200.1    | + | 125260430 | 125260479 |
| Sma-1-12385 | NS_000200.1    | + | 186886058 | 186886107 |
| Sma-1-12386 | NW_003026464.1 | - | 559658    | 559609    |
| Sma-1-12387 | NS_000200.1    | - | 203859967 | 203859918 |
| Sma-1-12388 | NW_003037933.1 | - | 195063    | 195014    |
| Sma-1-12389 | NS_000200.1    | - | 178608235 | 178608186 |
| Sma-1-12390 | NW_003037793.1 | + | 3016214   | 3016263   |
| Sma-1-12391 | NS_000200.1    | + | 3016214   | 3016263   |
| Sma-1-12392 | NW_003037939.1 | - | 705081    | 705032    |
| Sma-1-12393 | NS_000200.1    | - | 183574835 | 183574786 |
| Sma-1-12394 | NW_003037792.1 | - | 274538    | 274489    |
| Sma-1-12395 | NS_000200.1    | - | 382711882 | 382711833 |
| Sma-1-12396 | NW_003037832.1 | - | 337867    | 337818    |
| Sma-1-12397 | NS_000200.1    | - | 71547298  | 71547249  |
| Sma-1-12398 | NW_003037833.1 | + | 830542    | 830591    |
| Sma-1-12399 | NS_000200.1    | + | 73021638  | 73021687  |
| Sma-1-12400 | NW_003037917.1 | + | 1086388   | 1086437   |
| Sma-1-12401 | NS_000200.1    | + | 166123192 | 166123241 |
| Sma-1-12402 | NW_003037793.1 | + | 3117564   | 3117613   |
| Sma-1-12403 | NS_000200.1    | + | 3117564   | 3117613   |
| Sma-1-12404 | NW_003037793.1 | + | 1566431   | 1566480   |
| Sma-1-12405 | NS_000200.1    | + | 1566431   | 1566480   |
| Sma-1-12406 | NW_003038014.1 | + | 368599    | 368648    |
| Sma-1-12407 | NS_000200.1    | + | 230109288 | 230109337 |
| Sma-1-12408 | NW_003038014.1 | + | 376592    | 376641    |
| Sma-1-12409 | NS_000200.1    | + | 230117281 | 230117330 |
| Sma-1-12410 | NW_003037797.1 | - | 2546787   | 2546738   |
| Sma-1-12411 | NS_000200.1    | - | 12974647  | 12974598  |
| Sma-1-12412 | NW_003026465.1 | - | 618439    | 618390    |
| Sma-1-12413 | NW_003037799.1 | - | 1042976   | 1042927   |
| Sma-1-12414 | NW_003038097.1 | - | 11368     | 11319     |
| Sma-1-12415 | NS_000200.1    | - | 274261670 | 274261621 |
| Sma-1-12416 | NS_000200.1    | - | 208011033 | 208010984 |
| Sma-1-12417 | NS_000200.1    | - | 18033330  | 18033281  |
| Sma-1-12418 | NW_003026458.1 | + | 98808     | 98857     |
| Sma-1-12419 | NS_000200.1    | + | 101967038 | 101967087 |
| Sma-1-12420 | NW_003037906.1 | + | 528716    | 528765    |
| Sma-1-12421 | NS_000200.1    | + | 150836495 | 150836544 |
| Sma-1-12422 | NW_003037913.1 | - | 982966    | 982917    |
| Sma-1-12423 | NS_000200.1    | - | 159546717 | 159546668 |
| Sma-1-12424 | NW_003038050.1 | - | 226258    | 226209    |
| Sma-1-12425 | NS_000200.1    | - | 256501152 | 256501103 |
| Sma-1-12426 | NW_003038508.1 | + | 61259     | 61308     |
| Sma-1-12427 | NW_003026472.1 | + | 273956    | 274005    |
| Sma-1-12428 | NS_000200.1    | + | 236685948 | 236685997 |
| Sma-1-12429 | NS_000200.1    | + | 337168227 | 337168276 |

|             |                |   |           |           |
|-------------|----------------|---|-----------|-----------|
| Sma-1-12430 | NW_003037800.1 | - | 25303     | 25254     |
| Sma-1-12431 | NS_000200.1    | - | 18654663  | 18654614  |
| Sma-1-12432 | NW_003037914.1 | + | 1710738   | 1710787   |
| Sma-1-12433 | NS_000200.1    | + | 161854988 | 161855037 |
| Sma-1-12434 | NW_003037814.1 | + | 187689    | 187738    |
| Sma-1-12435 | NS_000200.1    | + | 43171549  | 43171598  |
| Sma-1-12436 | NW_003037804.1 | - | 1308578   | 1308529   |
| Sma-1-12437 | NS_000200.1    | - | 26448598  | 26448549  |
| Sma-1-12438 | NW_003037923.1 | - | 187346    | 187297    |
| Sma-1-12439 | NS_000200.1    | - | 171243559 | 171243510 |
| Sma-1-12440 | NW_003026605.1 | - | 8584      | 8535      |
| Sma-1-12441 | NS_000200.1    | - | 307687448 | 307687399 |
| Sma-1-12442 | NW_003037825.1 | + | 983424    | 983473    |
| Sma-1-12443 | NS_000200.1    | + | 60113206  | 60113255  |
| Sma-1-12444 | NW_003037988.1 | - | 150587    | 150538    |
| Sma-1-12445 | NS_000200.1    | - | 216144405 | 216144356 |
| Sma-1-12446 | NW_003038027.1 | + | 237753    | 237802    |
| Sma-1-12447 | NS_000200.1    | + | 240608467 | 240608516 |
| Sma-1-12448 | NW_003038035.1 | - | 185414    | 185365    |
| Sma-1-12449 | NS_000200.1    | - | 248046906 | 248046857 |
| Sma-1-12450 | NW_003038086.1 | + | 404890    | 404939    |
| Sma-1-12451 | NS_000200.1    | + | 272653483 | 272653532 |
| Sma-1-12452 | NW_003037850.1 | - | 1208518   | 1208469   |
| Sma-1-12453 | NS_000200.1    | - | 93194548  | 93194499  |
| Sma-1-12454 | NW_003037974.1 | - | 818015    | 817966    |
| Sma-1-12455 | NS_000200.1    | - | 205493321 | 205493272 |
| Sma-1-12456 | NW_003034567.1 | + | 10982     | 11031     |
| Sma-1-12457 | NW_003035881.1 | + | 332054    | 332103    |
| Sma-1-12458 | NS_000200.1    | + | 327651876 | 327651925 |
| Sma-1-12459 | NS_000200.1    | + | 341396259 | 341396308 |
| Sma-1-12460 | NW_003038014.1 | + | 533567    | 533616    |
| Sma-1-12461 | NS_000200.1    | + | 230274256 | 230274305 |
| Sma-1-12462 | NW_003038499.1 | - | 47460     | 47411     |
| Sma-1-12463 | NS_000200.1    | - | 334579994 | 334579945 |
| Sma-1-12464 | NW_003022703.1 | - | 1163      | 1114      |
| Sma-1-12465 | NW_003037821.1 | + | 624161    | 624210    |
| Sma-1-12466 | NW_003038008.1 | - | 499106    | 499057    |
| Sma-1-12467 | NS_000200.1    | + | 53768645  | 53768694  |
| Sma-1-12468 | NS_000200.1    | - | 365449719 | 365449670 |
| Sma-1-12469 | NS_000200.1    | - | 226172202 | 226172153 |
| env-87      | AB231864.1     | + | 33804     | 33853     |
| Sma-1-12470 | NW_003033780.1 | - | 3463      | 3414      |
| Sma-1-12471 | NW_003038013.1 | - | 330441    | 330392    |
| Sma-1-12472 | NW_003026456.1 | - | 511262    | 511213    |
| Sma-1-12473 | NW_003037795.1 | - | 785234    | 785185    |
| Sma-1-12474 | NW_003037796.1 | + | 275303    | 275352    |
| Sma-1-12475 | NW_003037797.1 | + | 1885676   | 1885725   |
| Sma-1-12476 | NW_003037816.1 | + | 526302    | 526351    |
| Sma-1-12477 | NW_003037825.1 | + | 1396103   | 1396152   |
| Sma-1-12478 | NW_003037831.1 | - | 499026    | 498977    |
| Sma-1-12479 | NW_003037852.1 | - | 185363    | 185314    |
| Sma-1-12480 | NW_003037894.1 | - | 427467    | 427418    |

|             |                |   |           |           |
|-------------|----------------|---|-----------|-----------|
| Sma-1-12481 | NW_003037906.1 | + | 17788     | 17837     |
| Sma-1-12482 | NW_003037913.1 | + | 469171    | 469220    |
| Sma-1-12483 | NW_003037917.1 | - | 853785    | 853736    |
| Sma-1-12484 | NW_003037932.1 | + | 823376    | 823425    |
| Sma-1-12485 | NW_003037939.1 | - | 870356    | 870307    |
| Sma-1-12486 | NW_003037978.1 | - | 104369    | 104320    |
| Sma-1-12487 | NW_003037980.1 | + | 183348    | 183397    |
| Sma-1-12488 | NW_003038008.1 | - | 18784     | 18735     |
| Sma-1-12489 | NW_003038015.1 | + | 92406     | 92455     |
| Sma-1-12490 | NW_003038015.1 | + | 188145    | 188194    |
| Sma-1-12491 | NW_003038033.1 | + | 148806    | 148855    |
| Sma-1-12492 | NW_003038069.1 | + | 129632    | 129681    |
| Sma-1-12493 | NW_003038252.1 | + | 164417    | 164466    |
| Sma-1-12494 | NW_003038255.1 | - | 275992    | 275943    |
| Sma-1-12495 | NW_003038055.1 | + | 265255    | 265304    |
| Sma-1-12496 | NW_003038136.1 | - | 162994    | 162945    |
| Sma-1-12497 | NS_000200.1    | + | 8484947   | 8484996   |
| Sma-1-12498 | NS_000200.1    | + | 12313536  | 12313585  |
| Sma-1-12499 | NS_000200.1    | + | 46735174  | 46735223  |
| Sma-1-12500 | NS_000200.1    | + | 60525885  | 60525934  |
| Sma-1-12501 | NS_000200.1    | + | 150325567 | 150325616 |
| Sma-1-12502 | NS_000200.1    | + | 159032922 | 159032971 |
| Sma-1-12503 | NS_000200.1    | + | 178356572 | 178356621 |
| Sma-1-12504 | NS_000200.1    | + | 211144210 | 211144259 |
| Sma-1-12505 | NS_000200.1    | + | 230415896 | 230415945 |
| Sma-1-12506 | NS_000200.1    | + | 230511635 | 230511684 |
| Sma-1-12507 | NS_000200.1    | + | 246128808 | 246128857 |
| Sma-1-12508 | NS_000200.1    | + | 258964577 | 258964626 |
| Sma-1-12509 | NS_000200.1    | + | 263973038 | 263973087 |
| Sma-1-12510 | NS_000200.1    | + | 319020005 | 319020054 |
| Sma-1-12511 | NS_000200.1    | - | 358944219 | 358944170 |
| Sma-1-12512 | NS_000200.1    | - | 320665137 | 320665088 |
| Sma-1-12513 | NS_000200.1    | - | 284285063 | 284285014 |
| Sma-1-12514 | NS_000200.1    | - | 229720067 | 229720018 |
| Sma-1-12515 | NS_000200.1    | - | 225691880 | 225691831 |
| Sma-1-12516 | NS_000200.1    | - | 209372379 | 209372330 |
| Sma-1-12517 | NS_000200.1    | - | 183740110 | 183740061 |
| Sma-1-12518 | NS_000200.1    | - | 165890589 | 165890540 |
| Sma-1-12519 | NS_000200.1    | - | 142324040 | 142323991 |
| Sma-1-12520 | NS_000200.1    | - | 94577258  | 94577209  |
| Sma-1-12521 | NS_000200.1    | - | 69948328  | 69948279  |
| Sma-1-12522 | NS_000200.1    | - | 58434398  | 58434349  |
| Sma-1-12523 | NS_000200.1    | - | 7176117   | 7176068   |
| Sma-1-12524 | NW_003038333.1 | + | 602       | 651       |
| Sma-1-12525 | NS_000200.1    | + | 326253793 | 326253842 |
| Sma-1-12526 | NW_003038211.1 | + | 143425    | 143474    |
| Sma-1-12527 | NW_003038224.1 | + | 107264    | 107313    |
| Sma-1-12528 | NW_003038086.1 | + | 164406    | 164455    |
| Sma-1-12529 | NW_003038102.1 | - | 45594     | 45545     |
| Sma-1-12530 | NS_000200.1    | + | 272412999 | 272413048 |
| Sma-1-12531 | NS_000200.1    | + | 306163495 | 306163544 |
| Sma-1-12532 | NS_000200.1    | + | 309518992 | 309519041 |

|             |                |   |           |           |
|-------------|----------------|---|-----------|-----------|
| Sma-1-12533 | NS_000200.1    | - | 274724540 | 274724491 |
| Sma-1-12534 | NW_003038022.1 | - | 468265    | 468216    |
| Sma-1-12535 | NS_000200.1    | - | 236149107 | 236149058 |
| Sma-1-12536 | NW_003038195.1 | + | 4250      | 4299      |
| Sma-1-12537 | NS_000200.1    | + | 302993022 | 302993071 |
| Sma-1-12538 | NW_003021533.1 | - | 98        | 49        |
| Sma-1-12539 | NW_003032444.1 | - | 1088      | 1039      |
| Sma-1-12540 | NW_003035313.1 | - | 417       | 368       |
| Sma-1-12541 | NS_000200.1    | - | 370994997 | 370994948 |
| Sma-1-12542 | NS_000200.1    | - | 348033254 | 348033205 |
| Sma-1-12543 | NS_000200.1    | - | 346092757 | 346092708 |
| Sma-1-12544 | NW_003037795.1 | - | 1137309   | 1137260   |
| Sma-1-12545 | NS_000200.1    | - | 7528192   | 7528143   |
| Sma-1-12546 | NW_003037812.1 | + | 1492642   | 1492691   |
| Sma-1-12547 | NW_003037822.1 | + | 1027831   | 1027880   |
| Sma-1-12548 | NW_003037825.1 | - | 1844147   | 1844098   |
| Sma-1-12549 | NW_003037863.1 | + | 1791      | 1840      |
| Sma-1-12550 | NW_003037879.1 | - | 370595    | 370546    |
| Sma-1-12551 | NW_003037906.1 | - | 584064    | 584015    |
| Sma-1-12552 | NS_000200.1    | + | 40975381  | 40975430  |
| Sma-1-12553 | NS_000200.1    | + | 55335837  | 55335886  |
| Sma-1-12554 | NS_000200.1    | + | 106760158 | 106760207 |
| Sma-1-12555 | NS_000200.1    | - | 150891843 | 150891794 |
| Sma-1-12556 | NS_000200.1    | - | 123372851 | 123372802 |
| Sma-1-12557 | NS_000200.1    | - | 60973929  | 60973880  |
| Sma-1-12558 | NW_003037937.1 | + | 4614      | 4663      |
| Sma-1-12559 | NS_000200.1    | + | 181204523 | 181204572 |
| Sma-1-12560 | NW_003037791.1 | + | 320321    | 320370    |
| Sma-1-12561 | NS_000200.1    | + | 382025749 | 382025798 |
| Sma-1-12562 | NW_003033261.1 | + | 462       | 511       |
| Sma-1-12563 | NW_003037795.1 | - | 1299655   | 1299606   |
| Sma-1-12564 | NW_003037797.1 | - | 1456150   | 1456101   |
| Sma-1-12565 | NW_003037846.1 | - | 717531    | 717482    |
| Sma-1-12566 | NW_003037911.1 | + | 817411    | 817460    |
| Sma-1-12567 | NW_003037981.1 | - | 187697    | 187648    |
| Sma-1-12568 | NS_000200.1    | + | 156604764 | 156604813 |
| Sma-1-12569 | NS_000200.1    | + | 346454891 | 346454940 |
| Sma-1-12570 | NS_000200.1    | - | 212585565 | 212585516 |
| Sma-1-12571 | NS_000200.1    | - | 88352101  | 88352052  |
| Sma-1-12572 | NS_000200.1    | - | 11884010  | 11883961  |
| Sma-1-12573 | NS_000200.1    | - | 7690538   | 7690489   |
| Sma-1-12574 | NW_003037069.1 | + | 1668      | 1717      |
| Sma-1-12575 | NW_003038078.1 | + | 15815     | 15864     |
| Sma-1-12576 | NS_000200.1    | + | 267222018 | 267222067 |
| Sma-1-12577 | NS_000200.1    | + | 343778301 | 343778350 |
| Sma-1-12578 | NW_003038020.1 | + | 40070     | 40119     |
| Sma-1-12579 | NS_000200.1    | + | 234007414 | 234007463 |
| Sma-1-12580 | NW_003033935.1 | - | 1118      | 1069      |
| Sma-1-12581 | NW_003037972.1 | + | 233615    | 233664    |
| Sma-1-12582 | NS_000200.1    | + | 202709319 | 202709368 |
| Sma-1-12583 | NS_000200.1    | - | 363264217 | 363264168 |
| Sma-1-12584 | NW_003037794.1 | - | 1230672   | 1230623   |



|             |                |   |           |           |
|-------------|----------------|---|-----------|-----------|
| Sma-1-12585 | NW_003037939.1 | + | 453578    | 453627    |
| Sma-1-12586 | NW_003038077.1 | + | 369574    | 369623    |
| Sma-1-12587 | NS_000200.1    | + | 183323332 | 183323381 |
| Sma-1-12588 | NS_000200.1    | + | 267141214 | 267141263 |
| Sma-1-12589 | NS_000200.1    | - | 5410267   | 5410218   |
| Sma-1-12590 | NW_003028448.1 | + | 1718      | 1767      |
| Sma-1-12591 | NS_000200.1    | + | 369661364 | 369661413 |
| Sma-1-12592 | NW_003037794.1 | - | 671905    | 671856    |
| Sma-1-12593 | NS_000200.1    | - | 4851500   | 4851451   |
| Sma-1-12594 | NW_003037814.1 | - | 722374    | 722325    |
| Sma-1-12595 | NS_000200.1    | - | 43706234  | 43706185  |
| Sma-1-12596 | NW_003037827.1 | + | 1152293   | 1152342   |
| Sma-1-12597 | NS_000200.1    | + | 63774434  | 63774483  |
| Sma-1-12598 | NW_003037817.1 | + | 869467    | 869516    |
| Sma-1-12599 | NW_003037831.1 | - | 1731318   | 1731269   |
| Sma-1-12600 | NW_003037849.1 | - | 263508    | 263459    |
| Sma-1-12601 | NS_000200.1    | + | 48251819  | 48251868  |
| Sma-1-12602 | NS_000200.1    | - | 91239781  | 91239732  |
| Sma-1-12603 | NS_000200.1    | - | 71180620  | 71180571  |
| Sma-1-12604 | NW_003037816.1 | - | 700235    | 700186    |
| Sma-1-12605 | NS_000200.1    | - | 46909107  | 46909058  |
| Sma-1-12606 | NW_003037814.1 | + | 1561734   | 1561783   |
| Sma-1-12607 | NS_000200.1    | + | 44545594  | 44545643  |
| Sma-1-12608 | NW_003037916.1 | + | 1597366   | 1597415   |
| Sma-1-12609 | NS_000200.1    | + | 164790777 | 164790826 |
| Sma-1-12610 | NW_003038070.1 | - | 422891    | 422842    |
| Sma-1-12611 | NS_000200.1    | - | 264760132 | 264760083 |
| Sma-1-12612 | NW_003038029.1 | + | 528116    | 528165    |
| Sma-1-12613 | NS_000200.1    | + | 242729017 | 242729066 |
| Sma-1-12614 | NW_003037809.1 | + | 951479    | 951528    |
| Sma-1-12615 | NW_003037910.1 | + | 1016536   | 1016585   |
| Sma-1-12616 | NS_000200.1    | + | 34615943  | 34615992  |
| Sma-1-12617 | NS_000200.1    | + | 155528511 | 155528560 |
| Sma-1-12618 | NW_003026458.1 | + | 631364    | 631413    |
| Sma-1-12619 | NS_000200.1    | + | 102499594 | 102499643 |
| Sma-1-12620 | NW_003037978.1 | + | 32323     | 32372     |
| Sma-1-12621 | NS_000200.1    | + | 209300333 | 209300382 |
| Sma-1-12622 | NW_003037794.1 | - | 2149953   | 2149904   |
| Sma-1-12623 | NS_000200.1    | - | 6329548   | 6329499   |
| Sma-1-12624 | NW_003037809.1 | - | 853536    | 853487    |
| Sma-1-12625 | NW_003037910.1 | + | 430287    | 430336    |
| Sma-1-12626 | NW_003038260.1 | + | 301048    | 301097    |
| Sma-1-12627 | NS_000200.1    | + | 154942262 | 154942311 |
| Sma-1-12628 | NS_000200.1    | + | 323472823 | 323472872 |
| Sma-1-12629 | NS_000200.1    | - | 34518000  | 34517951  |
| Sma-1-12630 | NW_003037918.1 | + | 859253    | 859302    |
| Sma-1-12631 | NS_000200.1    | + | 167426243 | 167426292 |
| Sma-1-12632 | NW_003037801.1 | + | 682539    | 682588    |
| Sma-1-12633 | NW_003037905.1 | + | 507666    | 507715    |
| Sma-1-12634 | NS_000200.1    | + | 21772019  | 21772068  |
| Sma-1-12635 | NS_000200.1    | + | 149776678 | 149776727 |
| Sma-1-12636 | NW_003038029.1 | + | 839715    | 839764    |

|             |                |   |           |           |
|-------------|----------------|---|-----------|-----------|
| Sma-1-12637 | NS_000200.1    | + | 243040616 | 243040665 |
| Sma-1-12638 | NW_003037851.1 | + | 11513     | 11562     |
| Sma-1-12639 | NW_003037866.1 | + | 528542    | 528591    |
| Sma-1-12640 | NS_000200.1    | + | 93414823  | 93414872  |
| Sma-1-12641 | NS_000200.1    | + | 112016341 | 112016390 |
| Sma-1-12642 | NW_003026465.1 | + | 185105    | 185154    |
| Sma-1-12643 | NS_000200.1    | + | 207577699 | 207577748 |
| Sma-1-12644 | NW_003038067.1 | - | 116814    | 116765    |
| Sma-1-12645 | NS_000200.1    | - | 262970867 | 262970818 |
| Sma-1-12646 | NW_003037793.1 | + | 992663    | 992712    |
| Sma-1-12647 | NW_003037838.1 | + | 725340    | 725389    |
| Sma-1-12648 | NW_003037907.1 | + | 130785    | 130834    |
| Sma-1-12649 | NW_003037910.1 | - | 970840    | 970791    |
| Sma-1-12650 | NS_000200.1    | + | 992663    | 992712    |
| Sma-1-12651 | NS_000200.1    | + | 78723903  | 78723952  |
| Sma-1-12652 | NS_000200.1    | + | 151535274 | 151535323 |
| Sma-1-12653 | NS_000200.1    | - | 155482815 | 155482766 |
| Sma-1-12654 | NW_003035639.1 | - | 38862     | 38813     |
| Sma-1-12655 | NS_000200.1    | - | 329989302 | 329989253 |
| Sma-1-12656 | NW_003037978.1 | - | 504069    | 504020    |
| Sma-1-12657 | NS_000200.1    | - | 209772079 | 209772030 |
| Sma-1-12658 | NW_003038505.1 | + | 234354    | 234403    |
| Sma-1-12659 | NS_000200.1    | + | 336313691 | 336313740 |
| Sma-1-12660 | NW_003022201.1 | - | 496       | 447       |
| Sma-1-12661 | NW_003029097.1 | - | 470       | 421       |
| Sma-1-12662 | NW_003033906.1 | + | 156       | 205       |
| Sma-1-12663 | NW_003037873.1 | - | 549766    | 549717    |
| Sma-1-12664 | NW_003026599.1 | - | 115042    | 114993    |
| Sma-1-12665 | NW_003038242.1 | - | 57728     | 57679     |
| Sma-1-12666 | NW_003026616.1 | - | 120640    | 120591    |
| Sma-1-12667 | NW_003037798.1 | + | 2092616   | 2092665   |
| Sma-1-12668 | NW_003037815.1 | - | 944508    | 944459    |
| Sma-1-12669 | NW_003037821.1 | + | 461880    | 461929    |
| Sma-1-12670 | NW_003037822.1 | + | 946439    | 946488    |
| Sma-1-12671 | NW_003037829.1 | + | 1751071   | 1751120   |
| Sma-1-12672 | NW_003037834.1 | + | 279603    | 279652    |
| Sma-1-12673 | NW_003037846.1 | + | 475774    | 475823    |
| Sma-1-12674 | NW_003037853.1 | - | 524167    | 524118    |
| Sma-1-12675 | NW_003037857.1 | - | 554366    | 554317    |
| Sma-1-12676 | NW_003037858.1 | + | 461503    | 461552    |
| Sma-1-12677 | NW_003037863.1 | + | 351919    | 351968    |
| Sma-1-12678 | NW_003037863.1 | - | 351397    | 351348    |
| Sma-1-12679 | NW_003037865.1 | - | 982053    | 982004    |
| Sma-1-12680 | NW_003037877.1 | + | 179608    | 179657    |
| Sma-1-12681 | NW_003037882.1 | + | 260147    | 260196    |
| Sma-1-12682 | NW_003037887.1 | + | 1589703   | 1589752   |
| Sma-1-12683 | NW_003037889.1 | - | 1735743   | 1735694   |
| Sma-1-12684 | NW_003037895.1 | + | 246236    | 246285    |
| Sma-1-12685 | NW_003037896.1 | - | 341663    | 341614    |
| Sma-1-12686 | NW_003037901.1 | + | 782018    | 782067    |
| Sma-1-12687 | NW_003037942.1 | - | 863200    | 863151    |
| Sma-1-12688 | NW_003037964.1 | - | 61297     | 61248     |

|             |                |   |           |           |
|-------------|----------------|---|-----------|-----------|
| Sma-1-12689 | NW_003037972.1 | + | 533255    | 533304    |
| Sma-1-12690 | NW_003038031.1 | - | 35114     | 35065     |
| Sma-1-12691 | NW_003038072.1 | - | 87891     | 87842     |
| Sma-1-12692 | NW_003038199.1 | + | 47077     | 47126     |
| Sma-1-12693 | NW_003038255.1 | + | 193925    | 193974    |
| Sma-1-12694 | NW_003039127.1 | + | 1160017   | 1160066   |
| Sma-1-12695 | NS_000200.1    | + | 16351774  | 16351823  |
| Sma-1-12696 | NS_000200.1    | + | 53606364  | 53606413  |
| Sma-1-12697 | NS_000200.1    | + | 55254445  | 55254494  |
| Sma-1-12698 | NS_000200.1    | + | 67651609  | 67651658  |
| Sma-1-12699 | NS_000200.1    | + | 73440089  | 73440138  |
| Sma-1-12700 | NS_000200.1    | + | 88110344  | 88110393  |
| Sma-1-12701 | NS_000200.1    | + | 101125779 | 101125828 |
| Sma-1-12702 | NS_000200.1    | + | 107110286 | 107110335 |
| Sma-1-12703 | NS_000200.1    | + | 114237516 | 114237565 |
| Sma-1-12704 | NS_000200.1    | + | 121218170 | 121218219 |
| Sma-1-12705 | NS_000200.1    | + | 125551821 | 125551870 |
| Sma-1-12706 | NS_000200.1    | + | 132053681 | 132053730 |
| Sma-1-12707 | NS_000200.1    | + | 142692438 | 142692487 |
| Sma-1-12708 | NS_000200.1    | + | 146630479 | 146630528 |
| Sma-1-12709 | NS_000200.1    | + | 203008959 | 203009008 |
| Sma-1-12710 | NS_000200.1    | + | 303566715 | 303566764 |
| Sma-1-12711 | NS_000200.1    | + | 320583070 | 320583119 |
| Sma-1-12712 | NS_000200.1    | + | 359448551 | 359448600 |
| Sma-1-12713 | NS_000200.1    | - | 375374393 | 375374344 |
| Sma-1-12714 | NS_000200.1    | - | 360920098 | 360920049 |
| Sma-1-12715 | NS_000200.1    | - | 317477239 | 317477190 |
| Sma-1-12716 | NS_000200.1    | - | 314756874 | 314756825 |
| Sma-1-12717 | NS_000200.1    | - | 305993371 | 305993322 |
| Sma-1-12718 | NS_000200.1    | - | 265250119 | 265250070 |
| Sma-1-12719 | NS_000200.1    | - | 244312872 | 244312823 |
| Sma-1-12720 | NS_000200.1    | - | 197662819 | 197662770 |
| Sma-1-12721 | NS_000200.1    | - | 186623108 | 186623059 |
| Sma-1-12722 | NS_000200.1    | - | 143262086 | 143262037 |
| Sma-1-12723 | NS_000200.1    | - | 135512233 | 135512184 |
| Sma-1-12724 | NS_000200.1    | - | 119288894 | 119288845 |
| Sma-1-12725 | NS_000200.1    | - | 111403972 | 111403923 |
| Sma-1-12726 | NS_000200.1    | - | 107109764 | 107109715 |
| Sma-1-12727 | NS_000200.1    | - | 100574723 | 100574674 |
| Sma-1-12728 | NS_000200.1    | - | 96016218  | 96016169  |
| Sma-1-12729 | NS_000200.1    | - | 46207499  | 46207450  |
| Sma-1-12730 | NW_003038029.1 | + | 504501    | 504550    |
| Sma-1-12731 | NS_000200.1    | + | 242705402 | 242705451 |
| Sma-1-12732 | NW_003037803.1 | + | 1327109   | 1327158   |
| Sma-1-12733 | NW_003037810.1 | - | 634738    | 634689    |
| Sma-1-12734 | NW_003038056.1 | - | 110393    | 110344    |
| Sma-1-12735 | NS_000200.1    | + | 24827646  | 24827695  |
| Sma-1-12736 | NS_000200.1    | - | 259088044 | 259087995 |
| Sma-1-12737 | NS_000200.1    | - | 37239260  | 37239211  |
| Sma-1-12738 | NW_003037939.1 | + | 827482    | 827531    |
| Sma-1-12739 | NS_000200.1    | + | 183697236 | 183697285 |
| Sma-1-12740 | NW_003037788.1 | + | 161985    | 162034    |

|             |                |   |           |           |
|-------------|----------------|---|-----------|-----------|
| Sma-1-12741 | NW_003037821.1 | + | 346555    | 346604    |
| Sma-1-12742 | NS_000200.1    | + | 53491039  | 53491088  |
| Sma-1-12743 | NS_000200.1    | + | 380609223 | 380609272 |
| Sma-1-12744 | NW_003037809.1 | - | 2497976   | 2497927   |
| Sma-1-12745 | NS_000200.1    | - | 36162440  | 36162391  |
| Sma-1-12746 | NW_003038131.1 | - | 101126    | 101077    |
| Sma-1-12747 | NS_000200.1    | - | 282062970 | 282062921 |
| Sma-1-12748 | NW_003037903.1 | - | 30175     | 30126     |
| Sma-1-12749 | NS_000200.1    | - | 147584256 | 147584207 |
| Sma-1-12750 | NW_003026618.1 | + | 50163     | 50212     |
| Sma-1-12751 | NS_000200.1    | + | 321805165 | 321805214 |
| Sma-1-12752 | NW_003038147.1 | + | 508056    | 508105    |
| Sma-1-12753 | NS_000200.1    | + | 290035799 | 290035848 |
| Sma-1-12754 | NW_003038256.1 | - | 113959    | 113910    |
| Sma-1-12755 | NW_003037818.1 | + | 664908    | 664957    |
| Sma-1-12756 | NW_003037981.1 | - | 1027942   | 1027893   |
| Sma-1-12757 | NS_000200.1    | + | 49380315  | 49380364  |
| Sma-1-12758 | NS_000200.1    | - | 320847785 | 320847736 |
| Sma-1-12759 | NS_000200.1    | - | 213425810 | 213425761 |
| Sma-1-12760 | NW_003023978.1 | + | 585       | 634       |
| Sma-1-12761 | NW_003027562.1 | - | 484       | 435       |
| Sma-1-12762 | NW_003033810.1 | - | 2098      | 2049      |
| Sma-1-12763 | NW_003037951.1 | + | 84148     | 84197     |
| Sma-1-12764 | NW_003037788.1 | - | 264273    | 264224    |
| Sma-1-12765 | NW_003037790.1 | - | 231061    | 231012    |
| Sma-1-12766 | NW_003026615.1 | + | 114889    | 114938    |
| Sma-1-12767 | NW_003026616.1 | + | 128714    | 128763    |
| Sma-1-12768 | NW_003037797.1 | + | 2503011   | 2503060   |
| Sma-1-12769 | NW_003037801.1 | + | 687825    | 687874    |
| Sma-1-12770 | NW_003037822.1 | + | 655294    | 655343    |
| Sma-1-12771 | NW_003037909.1 | - | 832283    | 832234    |
| Sma-1-12772 | NW_003037914.1 | - | 1199163   | 1199114   |
| Sma-1-12773 | NW_003037916.1 | + | 690830    | 690879    |
| Sma-1-12774 | NW_003037943.1 | + | 1167087   | 1167136   |
| Sma-1-12775 | NW_003037996.1 | + | 325569    | 325618    |
| Sma-1-12776 | NW_003038037.1 | + | 1676865   | 1676914   |
| Sma-1-12777 | NW_003039127.1 | + | 313569    | 313618    |
| Sma-1-12778 | NW_003039127.1 | + | 827994    | 828043    |
| Sma-1-12779 | NW_003038149.1 | + | 392947    | 392996    |
| Sma-1-12780 | NS_000200.1    | + | 12930871  | 12930920  |
| Sma-1-12781 | NS_000200.1    | + | 21777305  | 21777354  |
| Sma-1-12782 | NS_000200.1    | + | 54963300  | 54963349  |
| Sma-1-12783 | NS_000200.1    | + | 113391068 | 113391117 |
| Sma-1-12784 | NS_000200.1    | + | 113905493 | 113905542 |
| Sma-1-12785 | NS_000200.1    | + | 163884241 | 163884290 |
| Sma-1-12786 | NS_000200.1    | + | 188188620 | 188188669 |
| Sma-1-12787 | NS_000200.1    | + | 192761873 | 192761922 |
| Sma-1-12788 | NS_000200.1    | + | 220570445 | 220570494 |
| Sma-1-12789 | NS_000200.1    | + | 251832274 | 251832323 |
| Sma-1-12790 | NS_000200.1    | + | 291421560 | 291421609 |
| Sma-1-12791 | NS_000200.1    | + | 317109330 | 317109379 |
| Sma-1-12792 | NS_000200.1    | + | 317485313 | 317485362 |

|             |                |   |           |           |
|-------------|----------------|---|-----------|-----------|
| Sma-1-12793 | NS_000200.1    | + | 344357602 | 344357651 |
| Sma-1-12794 | NS_000200.1    | - | 381575233 | 381575184 |
| Sma-1-12795 | NS_000200.1    | - | 380711511 | 380711462 |
| Sma-1-12796 | NS_000200.1    | - | 361625963 | 361625914 |
| Sma-1-12797 | NS_000200.1    | - | 359089223 | 359089174 |
| Sma-1-12798 | NS_000200.1    | - | 161343413 | 161343364 |
| Sma-1-12799 | NS_000200.1    | - | 154373932 | 154373883 |
| Sma-1-12800 | NW_003037793.1 | - | 2828745   | 2828696   |
| Sma-1-12801 | NW_003037798.1 | - | 105212    | 105163    |
| Sma-1-12802 | NW_003037841.1 | - | 1993094   | 1993045   |
| Sma-1-12803 | NS_000200.1    | - | 84604275  | 84604226  |
| Sma-1-12804 | NS_000200.1    | - | 14364370  | 14364321  |
| Sma-1-12805 | NS_000200.1    | - | 2828745   | 2828696   |
| Sma-1-12806 | NW_003037809.1 | - | 2241066   | 2241017   |
| Sma-1-12807 | NW_003037911.1 | - | 409704    | 409655    |
| Sma-1-12808 | NW_003037918.1 | + | 1880642   | 1880691   |
| Sma-1-12809 | NS_000200.1    | + | 168447632 | 168447681 |
| Sma-1-12810 | NS_000200.1    | - | 156197057 | 156197008 |
| Sma-1-12811 | NS_000200.1    | - | 35905530  | 35905481  |
| Sma-1-12812 | NW_003037825.1 | - | 926171    | 926122    |
| Sma-1-12813 | NS_000200.1    | - | 60055953  | 60055904  |
| Sma-1-12814 | NW_003037909.1 | + | 512043    | 512092    |
| Sma-1-12815 | NS_000200.1    | + | 154053692 | 154053741 |
| Sma-1-12816 | NW_003037810.1 | + | 40676     | 40725     |
| Sma-1-12817 | NS_000200.1    | + | 36645198  | 36645247  |
| Sma-1-12818 | NW_003037814.1 | + | 1330130   | 1330179   |
| Sma-1-12819 | NS_000200.1    | + | 44313990  | 44314039  |
| Sma-1-12820 | NW_003038129.1 | - | 33598     | 33549     |
| Sma-1-12821 | NS_000200.1    | - | 281286945 | 281286896 |
| Sma-1-12822 | NW_003037827.1 | + | 368457    | 368506    |
| Sma-1-12823 | NS_000200.1    | + | 62990598  | 62990647  |
| Sma-1-12824 | NW_003026465.1 | - | 410570    | 410521    |
| Sma-1-12825 | NS_000200.1    | - | 207803164 | 207803115 |
| Sma-1-12826 | NW_003037795.1 | - | 278446    | 278397    |
| Sma-1-12827 | NS_000200.1    | - | 6669329   | 6669280   |
| Sma-1-12828 | NW_003037945.1 | + | 252613    | 252662    |
| Sma-1-12829 | NS_000200.1    | + | 189354577 | 189354626 |
| Sma-1-12830 | NW_003037829.1 | + | 1655963   | 1656012   |
| Sma-1-12831 | NS_000200.1    | + | 67556501  | 67556550  |
| Sma-1-12832 | NW_003037967.1 | + | 72414     | 72463     |
| Sma-1-12833 | NS_000200.1    | + | 199312385 | 199312434 |
| Sma-1-12834 | NW_003030121.1 | + | 34        | 83        |
| Sma-1-12835 | NW_003037841.1 | + | 182718    | 182767    |
| Sma-1-12836 | NW_003037939.1 | - | 334866    | 334817    |
| Sma-1-12837 | NS_000200.1    | + | 82793899  | 82793948  |
| Sma-1-12838 | NS_000200.1    | + | 357636263 | 357636312 |
| Sma-1-12839 | NS_000200.1    | - | 183204620 | 183204571 |
| Sma-1-12840 | NW_003038069.1 | + | 133426    | 133475    |
| Sma-1-12841 | NS_000200.1    | + | 263976832 | 263976881 |
| Sma-1-12842 | NW_003038163.1 | - | 623184    | 623135    |
| Sma-1-12843 | NS_000200.1    | - | 299023464 | 299023415 |
| Sma-1-12844 | NW_003037814.1 | - | 996896    | 996847    |

|             |                |   |           |           |
|-------------|----------------|---|-----------|-----------|
| Sma-1-12845 | NS.000200.1    | - | 43980756  | 43980707  |
| Sma-1-12846 | NW_003037803.1 | + | 1011696   | 1011745   |
| Sma-1-12847 | NS.000200.1    | + | 24512233  | 24512282  |
| Sma-1-12848 | NW_003037846.1 | - | 178122    | 178073    |
| Sma-1-12849 | NW_003026516.1 | - | 278437    | 278388    |
| Sma-1-12850 | NS.000200.1    | - | 299386734 | 299386685 |
| Sma-1-12851 | NS.000200.1    | - | 87812692  | 87812643  |
| Sma-1-12852 | NW_003037808.1 | + | 1047395   | 1047444   |
| Sma-1-12853 | NS.000200.1    | + | 32834032  | 32834081  |
| Sma-1-12854 | NW_003038068.1 | + | 204414    | 204463    |
| Sma-1-12855 | NS.000200.1    | + | 263271622 | 263271671 |
| Sma-1-12856 | NW_003037846.1 | - | 71912     | 71863     |
| Sma-1-12857 | NW_003037913.1 | + | 1506270   | 1506319   |
| Sma-1-12858 | NS.000200.1    | + | 160070021 | 160070070 |
| Sma-1-12859 | NS.000200.1    | - | 87706482  | 87706433  |
| Sma-1-12860 | NW_003037810.1 | - | 1430374   | 1430325   |
| Sma-1-12861 | NS.000200.1    | - | 38034896  | 38034847  |
| Sma-1-12862 | NW_003037932.1 | + | 739746    | 739795    |
| Sma-1-12863 | NS.000200.1    | + | 178272942 | 178272991 |
| Sma-1-12864 | NW_003037841.1 | + | 172737    | 172786    |
| Sma-1-12865 | NW_003038132.1 | + | 162479    | 162528    |
| Sma-1-12866 | NS.000200.1    | + | 82783918  | 82783967  |
| Sma-1-12867 | NS.000200.1    | + | 282582949 | 282582998 |
| Sma-1-12868 | NW_003037795.1 | - | 150467    | 150418    |
| Sma-1-12869 | NS.000200.1    | - | 6541350   | 6541301   |
| Sma-1-12870 | NW_003037971.1 | - | 594021    | 593972    |
| Sma-1-12871 | NS.000200.1    | - | 202216071 | 202216022 |
| Sma-1-12872 | NW_003038025.1 | + | 582940    | 582989    |
| Sma-1-12873 | NS.000200.1    | + | 239441185 | 239441234 |
| Sma-1-12874 | NW_003038214.1 | + | 5993      | 6042      |
| Sma-1-12875 | NW_003037793.1 | - | 2910049   | 2910000   |
| Sma-1-12876 | NS.000200.1    | + | 306545629 | 306545678 |
| Sma-1-12877 | NS.000200.1    | - | 2910049   | 2910000   |
| Sma-1-12878 | NW_003038025.1 | - | 271808    | 271759    |
| Sma-1-12879 | NS.000200.1    | - | 239130053 | 239130004 |
| Sma-1-12880 | NW_003038632.1 | - | 1565      | 1516      |
| Sma-1-12881 | NW_003037807.1 | + | 676623    | 676672    |
| Sma-1-12882 | NW_003037926.1 | + | 90237     | 90286     |
| Sma-1-12883 | NW_003038025.1 | + | 588414    | 588463    |
| Sma-1-12884 | NW_003038025.1 | + | 604348    | 604397    |
| Sma-1-12885 | NW_003026515.1 | + | 292757    | 292806    |
| Sma-1-12886 | NS.000200.1    | + | 30938139  | 30938188  |
| Sma-1-12887 | NS.000200.1    | + | 173258507 | 173258556 |
| Sma-1-12888 | NS.000200.1    | + | 239446659 | 239446708 |
| Sma-1-12889 | NS.000200.1    | + | 239462593 | 239462642 |
| Sma-1-12890 | NS.000200.1    | + | 290937168 | 290937217 |
| Sma-1-12891 | NS.000200.1    | - | 345742824 | 345742775 |
| Sma-1-12892 | NW_003037813.1 | - | 1208139   | 1208090   |
| Sma-1-12893 | NS.000200.1    | - | 42195002  | 42194953  |
| Sma-1-12894 | NW_003037810.1 | + | 70791     | 70840     |
| Sma-1-12895 | NS.000200.1    | + | 36675313  | 36675362  |
| Sma-1-12896 | NW_003037809.1 | - | 153712    | 153663    |

|             |                |   |           |           |
|-------------|----------------|---|-----------|-----------|
| Sma-1-12897 | NS_000200.1    | - | 33818176  | 33818127  |
| Sma-1-12898 | NW_003026609.1 | + | 78571     | 78620     |
| Sma-1-12899 | NS_000200.1    | + | 309733563 | 309733612 |
| Sma-1-12900 | NW_003037890.1 | - | 582066    | 582017    |
| Sma-1-12901 | NS_000200.1    | - | 136265427 | 136265378 |
| Sma-1-12902 | NW_003038064.1 | + | 277945    | 277994    |
| Sma-1-12903 | NS_000200.1    | + | 262114522 | 262114571 |
| Sma-1-12904 | NW_003038249.1 | + | 157090    | 157139    |
| Sma-1-12905 | NS_000200.1    | + | 316839343 | 316839392 |
| Sma-1-12906 | NW_003037818.1 | - | 250239    | 250190    |
| Sma-1-12907 | NS_000200.1    | - | 48965646  | 48965597  |
| Sma-1-12908 | NW_003026472.1 | - | 610882    | 610833    |
| Sma-1-12909 | NW_003037890.1 | - | 1437786   | 1437737   |
| Sma-1-12910 | NW_003037988.1 | - | 98010     | 97961     |
| Sma-1-12911 | NW_003038072.1 | - | 246632    | 246583    |
| Sma-1-12912 | NS_000200.1    | - | 265408860 | 265408811 |
| Sma-1-12913 | NS_000200.1    | - | 237022874 | 237022825 |
| Sma-1-12914 | NS_000200.1    | - | 216091828 | 216091779 |
| Sma-1-12915 | NS_000200.1    | - | 137121147 | 137121098 |
| Sma-1-12916 | NW_003038243.1 | - | 163800    | 163751    |
| Sma-1-12917 | NS_000200.1    | - | 315102284 | 315102235 |
| Sma-1-12918 | NW_003037786.1 | + | 78783     | 78832     |
| Sma-1-12919 | NW_003037841.1 | + | 1569182   | 1569231   |
| Sma-1-12920 | NW_003038137.1 | - | 196346    | 196297    |
| Sma-1-12921 | NS_000200.1    | + | 84180363  | 84180412  |
| Sma-1-12922 | NS_000200.1    | + | 380172143 | 380172192 |
| Sma-1-12923 | NS_000200.1    | - | 284985242 | 284985193 |
| Sma-1-12924 | NW_003032921.1 | - | 1031      | 982       |
| Sma-1-12925 | NW_003034577.1 | + | 1219      | 1268      |
| Sma-1-12926 | NS_000200.1    | + | 327708892 | 327708941 |
| Sma-1-12927 | NS_000200.1    | - | 325984269 | 325984220 |
| Sma-1-12928 | NW_003026619.1 | - | 299630    | 299581    |
| Sma-1-12929 | NW_003037863.1 | - | 1036402   | 1036353   |
| Sma-1-12930 | NW_003037964.1 | - | 340214    | 340165    |
| Sma-1-12931 | NS_000200.1    | - | 322490374 | 322490325 |
| Sma-1-12932 | NS_000200.1    | - | 197941736 | 197941687 |
| Sma-1-12933 | NS_000200.1    | - | 107794769 | 107794720 |
| Sma-1-12934 | NW_003037970.1 | - | 520291    | 520242    |
| Sma-1-12935 | NS_000200.1    | - | 201576481 | 201576432 |
| Sma-1-12936 | NW_003037973.1 | - | 514776    | 514727    |
| Sma-1-12937 | NS_000200.1    | - | 204496503 | 204496454 |
| Sma-1-12938 | NW_003037974.1 | + | 869655    | 869704    |
| Sma-1-12939 | NS_000200.1    | + | 205544961 | 205545010 |
| Sma-1-12940 | NW_003038129.1 | + | 187455    | 187504    |
| Sma-1-12941 | NS_000200.1    | + | 281440802 | 281440851 |
| Sma-1-12942 | NW_003024476.1 | + | 59        | 108       |
| Sma-1-12943 | NW_003037915.1 | + | 146540    | 146589    |
| Sma-1-12944 | NW_003038024.1 | - | 582815    | 582766    |
| Sma-1-12945 | NS_000200.1    | + | 162046526 | 162046575 |
| Sma-1-12946 | NS_000200.1    | + | 365807455 | 365807504 |
| Sma-1-12947 | NS_000200.1    | - | 238479844 | 238479795 |
| Sma-1-12948 | NW_003038210.1 | - | 59182     | 59133     |

|             |                |   |           |           |
|-------------|----------------|---|-----------|-----------|
| Sma-1-12949 | NS_000200.1    | - | 305521081 | 305521032 |
| Sma-1-12950 | NW_003037856.1 | + | 596856    | 596905    |
| Sma-1-12951 | NS_000200.1    | + | 99954812  | 99954861  |
| Sma-1-12952 | NW_003038003.1 | - | 361586    | 361537    |
| Sma-1-12953 | NS_000200.1    | - | 223860868 | 223860819 |
| Sma-1-12954 | NW_003038005.1 | + | 161255    | 161304    |
| Sma-1-12955 | NW_003037908.1 | - | 849576    | 849527    |
| Sma-1-12956 | NW_003038163.1 | + | 278616    | 278665    |
| Sma-1-12957 | NS_000200.1    | + | 224567209 | 224567258 |
| Sma-1-12958 | NS_000200.1    | + | 298678896 | 298678945 |
| Sma-1-12959 | NS_000200.1    | - | 153322707 | 153322658 |
| Sma-1-12960 | NW_003038027.1 | - | 327005    | 326956    |
| Sma-1-12961 | NS_000200.1    | - | 240697719 | 240697670 |
| Sma-1-12962 | NW_003038120.1 | + | 175389    | 175438    |
| Sma-1-12963 | NS_000200.1    | + | 278360612 | 278360661 |
| Sma-1-12964 | NW_003037821.1 | - | 236628    | 236579    |
| Sma-1-12965 | NS_000200.1    | - | 53381112  | 53381063  |
| Sma-1-12966 | NW_003029425.1 | + | 862       | 911       |
| Sma-1-12967 | NW_003038070.1 | - | 249726    | 249677    |
| Sma-1-12968 | NW_003037815.1 | - | 785372    | 785323    |
| Sma-1-12969 | NW_003037833.1 | + | 555536    | 555585    |
| Sma-1-12970 | NW_003037848.1 | - | 549244    | 549195    |
| Sma-1-12971 | NW_003037925.1 | - | 615197    | 615148    |
| Sma-1-12972 | NW_003037945.1 | + | 554921    | 554970    |
| Sma-1-12973 | NW_003038064.1 | - | 93775     | 93726     |
| Sma-1-12974 | NS_000200.1    | + | 72746632  | 72746681  |
| Sma-1-12975 | NS_000200.1    | + | 189656885 | 189656934 |
| Sma-1-12976 | NS_000200.1    | + | 362039901 | 362039950 |
| Sma-1-12977 | NS_000200.1    | - | 264586967 | 264586918 |
| Sma-1-12978 | NS_000200.1    | - | 261930352 | 261930303 |
| Sma-1-12979 | NS_000200.1    | - | 173017200 | 173017151 |
| Sma-1-12980 | NS_000200.1    | - | 90242315  | 90242266  |
| Sma-1-12981 | NS_000200.1    | - | 46048363  | 46048314  |
| Sma-1-12982 | NW_003020614.1 | - | 624       | 575       |
| Sma-1-12983 | NW_003037878.1 | + | 187906    | 187955    |
| Sma-1-12984 | NS_000200.1    | + | 122241384 | 122241433 |
| Sma-1-12985 | NS_000200.1    | - | 360433329 | 360433280 |
| Sma-1-12986 | NW_003038457.1 | + | 21224     | 21273     |
| Sma-1-12987 | NW_003037818.1 | + | 1316358   | 1316407   |
| Sma-1-12988 | NW_003037988.1 | - | 107151    | 107102    |
| Sma-1-12989 | NW_003038025.1 | - | 333406    | 333357    |
| Sma-1-12990 | NS_000200.1    | + | 50031765  | 50031814  |
| Sma-1-12991 | NS_000200.1    | + | 331103088 | 331103137 |
| Sma-1-12992 | NS_000200.1    | - | 239191651 | 239191602 |
| Sma-1-12993 | NS_000200.1    | - | 216100969 | 216100920 |
| Sma-1-12994 | NW_003038256.1 | - | 167278    | 167229    |
| Sma-1-12995 | NS_000200.1    | - | 320901104 | 320901055 |
| Sma-1-12996 | NW_003038511.1 | - | 183193    | 183144    |
| Sma-1-12997 | NS_000200.1    | - | 338528405 | 338528356 |
| Sma-1-12998 | NW_003038064.1 | + | 92516     | 92565     |
| Sma-1-12999 | NS_000200.1    | + | 261929093 | 261929142 |
| Sma-1-13000 | NW_003038043.1 | + | 133032    | 133081    |



|             |                |   |           |           |
|-------------|----------------|---|-----------|-----------|
| Sma-1-13001 | NS_000200.1    | + | 254443074 | 254443123 |
| Sma-1-13002 | NW_003038232.1 | - | 338884    | 338835    |
| Sma-1-13003 | NS_000200.1    | - | 312302675 | 312302626 |
| Sma-1-13004 | NW_003038028.1 | + | 654491    | 654540    |
| Sma-1-13005 | NS_000200.1    | + | 241962065 | 241962114 |
| Sma-1-13006 | NW_003035682.1 | + | 13005     | 13054     |
| Sma-1-13007 | NW_003026617.1 | + | 51872     | 51921     |
| Sma-1-13008 | NW_003035879.1 | + | 252645    | 252694    |
| Sma-1-13009 | NW_003037800.1 | + | 1353334   | 1353383   |
| Sma-1-13010 | NW_003037809.1 | - | 584745    | 584696    |
| Sma-1-13011 | NW_003037833.1 | + | 586301    | 586350    |
| Sma-1-13012 | NW_003037848.1 | - | 135857    | 135808    |
| Sma-1-13013 | NW_003037901.1 | + | 312254    | 312303    |
| Sma-1-13014 | NW_003037918.1 | - | 113224    | 113175    |
| Sma-1-13015 | NW_003037954.1 | - | 18269     | 18220     |
| Sma-1-13016 | NW_003038027.1 | - | 817900    | 817851    |
| Sma-1-13017 | NW_003038032.1 | - | 162037    | 161988    |
| Sma-1-13018 | NW_003038453.1 | + | 95114     | 95163     |
| Sma-1-13019 | NW_003038042.1 | - | 184919    | 184870    |
| Sma-1-13020 | NW_003038124.1 | - | 161402    | 161353    |
| Sma-1-13021 | NW_003038143.1 | - | 409736    | 409687    |
| Sma-1-13022 | NW_003038145.1 | + | 124797    | 124846    |
| Sma-1-13023 | NW_003038151.1 | + | 133116    | 133165    |
| Sma-1-13024 | NW_003038155.1 | - | 381630    | 381581    |
| Sma-1-13025 | NS_000200.1    | + | 19982694  | 19982743  |
| Sma-1-13026 | NS_000200.1    | + | 72777397  | 72777446  |
| Sma-1-13027 | NS_000200.1    | + | 146160715 | 146160764 |
| Sma-1-13028 | NS_000200.1    | + | 288736220 | 288736269 |
| Sma-1-13029 | NS_000200.1    | + | 292040359 | 292040408 |
| Sma-1-13030 | NS_000200.1    | + | 319622731 | 319622780 |
| Sma-1-13031 | NS_000200.1    | + | 330677041 | 330677090 |
| Sma-1-13032 | NS_000200.1    | + | 332635058 | 332635107 |
| Sma-1-13033 | NS_000200.1    | + | 338219972 | 338220021 |
| Sma-1-13034 | NS_000200.1    | - | 294504748 | 294504699 |
| Sma-1-13035 | NS_000200.1    | - | 288169228 | 288169179 |
| Sma-1-13036 | NS_000200.1    | - | 279154046 | 279153997 |
| Sma-1-13037 | NS_000200.1    | - | 254130518 | 254130469 |
| Sma-1-13038 | NS_000200.1    | - | 245321197 | 245321148 |
| Sma-1-13039 | NS_000200.1    | - | 241188614 | 241188565 |
| Sma-1-13040 | NS_000200.1    | - | 193247891 | 193247842 |
| Sma-1-13041 | NS_000200.1    | - | 166680214 | 166680165 |
| Sma-1-13042 | NS_000200.1    | - | 89828928  | 89828879  |
| Sma-1-13043 | NS_000200.1    | - | 34249209  | 34249160  |
| Sma-1-13044 | NW_003037889.1 | - | 892432    | 892384    |
| Sma-1-13045 | NS_000200.1    | - | 134668922 | 134668874 |
| Sma-1-13046 | NW_003037836.1 | + | 1118921   | 1118970   |
| Sma-1-13047 | NW_003037840.1 | - | 1509871   | 1509822   |
| Sma-1-13048 | NW_003038020.1 | + | 698683    | 698732    |
| Sma-1-13049 | NW_003038033.1 | - | 248390    | 248341    |
| Sma-1-13050 | NW_003026510.1 | + | 48972     | 49021     |
| Sma-1-13051 | NS_000200.1    | + | 76676020  | 76676069  |
| Sma-1-13052 | NS_000200.1    | + | 234666027 | 234666076 |

|             |                |   |           |           |
|-------------|----------------|---|-----------|-----------|
| Sma-1-13053 | NS_000200.1    | + | 283489153 | 283489202 |
| Sma-1-13054 | NS_000200.1    | - | 246228392 | 246228343 |
| Sma-1-13055 | NS_000200.1    | - | 82133195  | 82133146  |
| Sma-1-13056 | NW_003038250.1 | + | 278672    | 278721    |
| Sma-1-13057 | NW_003038152.1 | + | 317901    | 317950    |
| Sma-1-13058 | NS_000200.1    | + | 292923625 | 292923674 |
| Sma-1-13059 | NS_000200.1    | + | 318331349 | 318331398 |
| Sma-1-13060 | NW_003030738.1 | + | 775       | 824       |
| Sma-1-13061 | NS_000200.1    | + | 366824476 | 366824525 |
| Sma-1-13062 | NW_003037846.1 | - | 93020     | 92971     |
| Sma-1-13063 | NS_000200.1    | - | 87727590  | 87727541  |
| Sma-1-13064 | NW_003037869.1 | - | 119960    | 119911    |
| Sma-1-13065 | NS_000200.1    | - | 116592305 | 116592256 |
| Sma-1-13066 | NW_003037891.1 | - | 170064    | 170015    |
| Sma-1-13067 | NS_000200.1    | - | 138051342 | 138051293 |
| Sma-1-13068 | NW_003037841.1 | + | 1780688   | 1780737   |
| Sma-1-13069 | NS_000200.1    | + | 84391869  | 84391918  |
| Sma-1-13070 | NW_003037916.1 | + | 1728916   | 1728965   |
| Sma-1-13071 | NW_003038037.1 | - | 929450    | 929401    |
| Sma-1-13072 | NS_000200.1    | + | 164922327 | 164922376 |
| Sma-1-13073 | NS_000200.1    | - | 251084859 | 251084810 |
| Sma-1-13074 | NW_003037936.1 | + | 390563    | 390612    |
| Sma-1-13075 | NW_003037794.1 | + | 869614    | 869663    |
| Sma-1-13076 | NS_000200.1    | + | 5049209   | 5049258   |
| Sma-1-13077 | NS_000200.1    | + | 180830292 | 180830341 |
| Sma-1-13078 | NW_003037941.1 | + | 898629    | 898678    |
| Sma-1-13079 | NW_003037972.1 | + | 622226    | 622275    |
| Sma-1-13080 | NW_003037976.1 | - | 165808    | 165759    |
| Sma-1-13081 | NS_000200.1    | + | 185633103 | 185633152 |
| Sma-1-13082 | NS_000200.1    | + | 203097930 | 203097979 |
| Sma-1-13083 | NS_000200.1    | - | 206780123 | 206780074 |
| Sma-1-13084 | NW_003038244.1 | + | 407106    | 407155    |
| Sma-1-13085 | NS_000200.1    | + | 315552311 | 315552360 |
| Sma-1-13086 | NW_003038032.1 | + | 181242    | 181291    |
| Sma-1-13087 | NS_000200.1    | + | 245340402 | 245340451 |
| Sma-1-13088 | NW_003037923.1 | + | 278716    | 278765    |
| Sma-1-13089 | NS_000200.1    | + | 171334929 | 171334978 |
| Sma-1-13090 | NW_003037800.1 | + | 1610531   | 1610580   |
| Sma-1-13091 | NS_000200.1    | + | 20239891  | 20239940  |
| Sma-1-13092 | NW_003037937.1 | + | 832490    | 832539    |
| Sma-1-13093 | NS_000200.1    | + | 182032399 | 182032448 |
| Sma-1-13094 | NW_003037970.1 | - | 416255    | 416206    |
| Sma-1-13095 | NS_000200.1    | - | 201472445 | 201472396 |
| Sma-1-13096 | NW_003037376.1 | + | 438       | 487       |
| Sma-1-13097 | NW_003032160.1 | - | 210566    | 210517    |
| Sma-1-13098 | NW_003037866.1 | - | 1499327   | 1499278   |
| Sma-1-13099 | NW_003037871.1 | + | 432111    | 432160    |
| Sma-1-13100 | NW_003037912.1 | + | 1036693   | 1036742   |
| Sma-1-13101 | NW_003037918.1 | - | 2190875   | 2190826   |
| Sma-1-13102 | NW_003038037.1 | - | 1665753   | 1665704   |
| Sma-1-13103 | NW_003038517.1 | - | 77659     | 77610     |
| Sma-1-13104 | NW_003026512.1 | + | 133119    | 133168    |

|             |                |   |           |           |
|-------------|----------------|---|-----------|-----------|
| Sma-1-13105 | NS_000200.1    | + | 117879849 | 117879898 |
| Sma-1-13106 | NS_000200.1    | + | 157848268 | 157848317 |
| Sma-1-13107 | NS_000200.1    | + | 285227159 | 285227208 |
| Sma-1-13108 | NS_000200.1    | + | 367306665 | 367306714 |
| Sma-1-13109 | NS_000200.1    | - | 381218652 | 381218603 |
| Sma-1-13110 | NS_000200.1    | - | 340842147 | 340842098 |
| Sma-1-13111 | NS_000200.1    | - | 251821162 | 251821113 |
| Sma-1-13112 | NS_000200.1    | - | 168757865 | 168757816 |
| Sma-1-13113 | NS_000200.1    | - | 112987126 | 112987077 |
| Sma-1-13114 | NW_003037796.1 | + | 505313    | 505362    |
| Sma-1-13115 | NS_000200.1    | + | 8714957   | 8715006   |
| Sma-1-13116 | NW_003037854.1 | - | 1840436   | 1840387   |
| Sma-1-13117 | NS_000200.1    | - | 98744857  | 98744808  |
| Sma-1-13118 | NW_003037795.1 | - | 625684    | 625635    |
| Sma-1-13119 | NS_000200.1    | - | 7016567   | 7016518   |
| Sma-1-13120 | NW_003037961.1 | + | 338128    | 338177    |
| Sma-1-13121 | NS_000200.1    | + | 195962370 | 195962419 |
| Sma-1-13122 | NW_003037809.1 | - | 55198     | 55149     |
| Sma-1-13123 | NS_000200.1    | - | 33719662  | 33719613  |
| Sma-1-13124 | NW_003037881.1 | + | 462157    | 462206    |
| Sma-1-13125 | NW_003037977.1 | + | 654252    | 654301    |
| Sma-1-13126 | NW_003038153.1 | + | 577473    | 577522    |
| Sma-1-13127 | NS_000200.1    | + | 124893948 | 124893997 |
| Sma-1-13128 | NS_000200.1    | + | 208940272 | 208940321 |
| Sma-1-13129 | NS_000200.1    | + | 293639522 | 293639571 |
| Sma-1-13130 | NW_003037879.1 | + | 175817    | 175866    |
| Sma-1-13131 | NS_000200.1    | + | 123178073 | 123178122 |
| Sma-1-13132 | NW_003037882.1 | - | 536259    | 536210    |
| Sma-1-13133 | NS_000200.1    | - | 125827933 | 125827884 |
| Sma-1-13134 | NW_003037878.1 | - | 504818    | 504769    |
| Sma-1-13135 | NS_000200.1    | - | 122558296 | 122558247 |
| Sma-1-13136 | NW_003037840.1 | - | 1291967   | 1291918   |
| Sma-1-13137 | NS_000200.1    | - | 81915291  | 81915242  |
| Sma-1-13138 | NW_003037796.1 | + | 555074    | 555123    |
| Sma-1-13139 | NS_000200.1    | + | 8764718   | 8764767   |
| Sma-1-13140 | NW_003021447.1 | - | 443       | 394       |
| Sma-1-13141 | NW_003026612.1 | + | 235826    | 235875    |
| Sma-1-13142 | NW_003037823.1 | - | 873300    | 873251    |
| Sma-1-13143 | NS_000200.1    | + | 312541213 | 312541262 |
| Sma-1-13144 | NS_000200.1    | - | 344085727 | 344085678 |
| Sma-1-13145 | NS_000200.1    | - | 56789919  | 56789870  |
| Sma-1-13146 | NW_003037810.1 | + | 1137663   | 1137712   |
| Sma-1-13147 | NW_003037839.1 | + | 1271051   | 1271100   |
| Sma-1-13148 | NW_003038036.1 | - | 229133    | 229084    |
| Sma-1-13149 | NS_000200.1    | + | 37742185  | 37742234  |
| Sma-1-13150 | NS_000200.1    | + | 80229201  | 80229250  |
| Sma-1-13151 | NS_000200.1    | - | 249162985 | 249162936 |
| Sma-1-13152 | NW_003037818.1 | + | 1021453   | 1021502   |
| Sma-1-13153 | NW_003038153.1 | + | 678506    | 678555    |
| Sma-1-13154 | NS_000200.1    | + | 49736860  | 49736909  |
| Sma-1-13155 | NS_000200.1    | + | 293740555 | 293740604 |
| Sma-1-13156 | NW_003037877.1 | + | 675254    | 675303    |

|             |                |   |           |           |
|-------------|----------------|---|-----------|-----------|
| Sma-1-13157 | NS_000200.1    | + | 121713816 | 121713865 |
| Sma-1-13158 | NW_003037884.1 | - | 1123674   | 1123625   |
| Sma-1-13159 | NS_000200.1    | - | 127903339 | 127903290 |
| Sma-1-13160 | NW_003037875.1 | - | 399239    | 399190    |
| Sma-1-13161 | NS_000200.1    | - | 120427908 | 120427859 |
| Sma-1-13162 | NW_003037884.1 | - | 4141      | 4092      |
| Sma-1-13163 | NS_000200.1    | - | 126783806 | 126783757 |
| Sma-1-13164 | NW_003037884.1 | - | 923851    | 923802    |
| Sma-1-13165 | NW_003038014.1 | + | 291755    | 291804    |
| Sma-1-13166 | NS_000200.1    | + | 230032444 | 230032493 |
| Sma-1-13167 | NS_000200.1    | - | 127703516 | 127703467 |
| Sma-1-13168 | NW_003037873.1 | - | 314019    | 313970    |
| Sma-1-13169 | NS_000200.1    | - | 119053147 | 119053098 |
| Sma-1-13170 | NW_003037930.1 | - | 290461    | 290412    |
| Sma-1-13171 | NS_000200.1    | - | 176148425 | 176148376 |
| Sma-1-13172 | NW_003037840.1 | + | 1557022   | 1557071   |
| Sma-1-13173 | NW_003038124.1 | - | 179162    | 179113    |
| Sma-1-13174 | NS_000200.1    | + | 82180346  | 82180395  |
| Sma-1-13175 | NS_000200.1    | - | 279171806 | 279171757 |
| Sma-1-13176 | NW_003037840.1 | - | 1560544   | 1560495   |
| Sma-1-13177 | NS_000200.1    | - | 82183868  | 82183819  |
| Sma-1-13178 | NW_003037796.1 | + | 2010388   | 2010437   |
| Sma-1-13179 | NS_000200.1    | + | 10220032  | 10220081  |
| Sma-1-13180 | NW_003037786.1 | - | 94551     | 94502     |
| Sma-1-13181 | NW_003037858.1 | - | 1131052   | 1131003   |
| Sma-1-13182 | NS_000200.1    | - | 380187911 | 380187862 |
| Sma-1-13183 | NS_000200.1    | - | 101795328 | 101795279 |
| Sma-1-13184 | NW_003030981.1 | + | 1663      | 1712      |
| Sma-1-13185 | NW_003038151.1 | + | 27202     | 27251     |
| Sma-1-13186 | NS_000200.1    | + | 291934445 | 291934494 |
| Sma-1-13187 | NS_000200.1    | + | 370656840 | 370656889 |
| Sma-1-13188 | NW_003026517.1 | - | 233997    | 233948    |
| Sma-1-13189 | NS_000200.1    | - | 299840006 | 299839957 |
| Sma-1-13190 | NW_003038227.1 | - | 226903    | 226854    |
| Sma-1-13191 | NS_000200.1    | - | 310508257 | 310508208 |
| Sma-1-13192 | NW_003029251.1 | + | 59        | 108       |
| Sma-1-13193 | NS_000200.1    | + | 357164269 | 357164318 |
| Sma-1-13194 | NW_003038037.1 | + | 709395    | 709444    |
| Sma-1-13195 | NS_000200.1    | + | 250864804 | 250864853 |
| Sma-1-13196 | NW_003038210.1 | - | 78123     | 78074     |
| Sma-1-13197 | NS_000200.1    | - | 305540022 | 305539973 |
| Sma-1-13198 | NW_003038163.1 | - | 118879    | 118830    |
| Sma-1-13199 | NS_000200.1    | - | 298519159 | 298519110 |
| Sma-1-13200 | NW_003037923.1 | + | 448020    | 448069    |
| Sma-1-13201 | NW_003037971.1 | + | 453686    | 453735    |
| Sma-1-13202 | NS_000200.1    | + | 171504233 | 171504282 |
| Sma-1-13203 | NS_000200.1    | + | 202075736 | 202075785 |
| Sma-1-13204 | NW_003038218.1 | - | 207367    | 207318    |
| Sma-1-13205 | NS_000200.1    | - | 307647665 | 307647616 |
| Sma-1-13206 | NW_003038305.1 | - | 2044      | 1995      |
| Sma-1-13207 | NS_000200.1    | - | 325748830 | 325748781 |
| Sma-1-13208 | NW_003038037.1 | + | 531251    | 531300    |

|             |                |   |           |           |
|-------------|----------------|---|-----------|-----------|
| Sma-1-13209 | NS_000200.1    | + | 250686660 | 250686709 |
| Sma-1-13210 | NW_003026465.1 | + | 377562    | 377611    |
| Sma-1-13211 | NW_003037798.1 | - | 497661    | 497612    |
| Sma-1-13212 | NW_003037806.1 | + | 236779    | 236828    |
| Sma-1-13213 | NW_003037809.1 | + | 1365142   | 1365191   |
| Sma-1-13214 | NW_003037817.1 | - | 698146    | 698097    |
| Sma-1-13215 | NW_003037821.1 | - | 543829    | 543780    |
| Sma-1-13216 | NW_003037833.1 | + | 926431    | 926480    |
| Sma-1-13217 | NW_003037847.1 | + | 1015943   | 1015992   |
| Sma-1-13218 | NW_003037849.1 | + | 935501    | 935550    |
| Sma-1-13219 | NW_003037891.1 | + | 2814045   | 2814094   |
| Sma-1-13220 | NW_003037894.1 | + | 273067    | 273116    |
| Sma-1-13221 | NW_003037905.1 | + | 735797    | 735846    |
| Sma-1-13222 | NW_003037972.1 | + | 625786    | 625835    |
| Sma-1-13223 | NW_003038518.1 | - | 242718    | 242669    |
| Sma-1-13224 | NS_000200.1    | + | 28431993  | 28432042  |
| Sma-1-13225 | NS_000200.1    | + | 35029606  | 35029655  |
| Sma-1-13226 | NS_000200.1    | + | 73117527  | 73117576  |
| Sma-1-13227 | NS_000200.1    | + | 89667673  | 89667722  |
| Sma-1-13228 | NS_000200.1    | + | 91911774  | 91911823  |
| Sma-1-13229 | NS_000200.1    | + | 140695323 | 140695372 |
| Sma-1-13230 | NS_000200.1    | + | 142169640 | 142169689 |
| Sma-1-13231 | NS_000200.1    | + | 150004809 | 150004858 |
| Sma-1-13232 | NS_000200.1    | + | 203101490 | 203101539 |
| Sma-1-13233 | NS_000200.1    | + | 207770156 | 207770205 |
| Sma-1-13234 | NS_000200.1    | - | 341879551 | 341879502 |
| Sma-1-13235 | NS_000200.1    | - | 53688313  | 53688264  |
| Sma-1-13236 | NS_000200.1    | - | 48080498  | 48080449  |
| Sma-1-13237 | NS_000200.1    | - | 14756819  | 14756770  |
| Sma-1-13238 | NW_003024030.1 | + | 418       | 467       |
| Sma-1-13239 | NW_003037800.1 | + | 2176341   | 2176390   |
| Sma-1-13240 | NW_003037906.1 | + | 470847    | 470896    |
| Sma-1-13241 | NS_000200.1    | + | 20805701  | 20805750  |
| Sma-1-13242 | NS_000200.1    | + | 150778626 | 150778675 |
| Sma-1-13243 | NS_000200.1    | + | 344488899 | 344488948 |
| Sma-1-13244 | NW_003034025.1 | + | 3913      | 3962      |
| Sma-1-13245 | NW_003037874.1 | - | 171009    | 170960    |
| Sma-1-13246 | NW_003037937.1 | + | 268914    | 268963    |
| Sma-1-13247 | NW_003037816.1 | - | 856720    | 856671    |
| Sma-1-13248 | NW_003037829.1 | - | 997891    | 997842    |
| Sma-1-13249 | NW_003037917.1 | - | 234121    | 234072    |
| Sma-1-13250 | NW_003037922.1 | + | 73475     | 73524     |
| Sma-1-13251 | NS_000200.1    | + | 169997472 | 169997521 |
| Sma-1-13252 | NS_000200.1    | + | 181468823 | 181468872 |
| Sma-1-13253 | NS_000200.1    | + | 363502710 | 363502759 |
| Sma-1-13254 | NS_000200.1    | - | 165270925 | 165270876 |
| Sma-1-13255 | NS_000200.1    | - | 119595959 | 119595910 |
| Sma-1-13256 | NS_000200.1    | - | 66898429  | 66898380  |
| Sma-1-13257 | NS_000200.1    | - | 47065592  | 47065543  |
| Sma-1-13258 | NW_003039127.1 | + | 825682    | 825731    |
| Sma-1-13259 | NS_000200.1    | + | 113903181 | 113903230 |
| Sma-1-13260 | NW_003037806.1 | + | 34181     | 34230     |

|             |                |   |           |           |
|-------------|----------------|---|-----------|-----------|
| Sma-1-13261 | NS_000200.1    | + | 28229395  | 28229444  |
| Sma-1-13262 | NW_003037966.1 | - | 290133    | 290084    |
| Sma-1-13263 | NS_000200.1    | - | 198991996 | 198991947 |
| Sma-1-13264 | NW_003037793.1 | + | 2746402   | 2746451   |
| Sma-1-13265 | NW_003037866.1 | - | 1397280   | 1397231   |
| Sma-1-13266 | NW_003038015.1 | - | 705178    | 705129    |
| Sma-1-13267 | NS_000200.1    | + | 2746402   | 2746451   |
| Sma-1-13268 | NS_000200.1    | - | 231028668 | 231028619 |
| Sma-1-13269 | NS_000200.1    | - | 112885079 | 112885030 |
| Sma-1-13270 | NW_003037885.1 | - | 527270    | 527221    |
| Sma-1-13271 | NS_000200.1    | - | 128625217 | 128625168 |
| Sma-1-13272 | NW_003037886.1 | - | 1042867   | 1042818   |
| Sma-1-13273 | NS_000200.1    | - | 130298434 | 130298385 |
| Sma-1-13274 | NW_003037868.1 | + | 360001    | 360050    |
| Sma-1-13275 | NS_000200.1    | + | 116331713 | 116331762 |
| Sma-1-13276 | NW_003037886.1 | + | 121004    | 121053    |
| Sma-1-13277 | NS_000200.1    | + | 129376571 | 129376620 |
| Sma-1-13278 | NW_003037864.1 | + | 144563    | 144612    |
| Sma-1-13279 | NS_000200.1    | + | 108637137 | 108637186 |
| Sma-1-13280 | NW_003037887.1 | + | 1397188   | 1397237   |
| Sma-1-13281 | NS_000200.1    | + | 131861166 | 131861215 |
| Sma-1-13282 | NW_003037887.1 | + | 432373    | 432422    |
| Sma-1-13283 | NS_000200.1    | + | 130896351 | 130896400 |
| Sma-1-13284 | NW_003037838.1 | + | 517373    | 517422    |
| Sma-1-13285 | NS_000200.1    | + | 78515936  | 78515985  |
| Sma-1-13286 | NW_003037865.1 | + | 283314    | 283363    |
| Sma-1-13287 | NW_003037899.1 | - | 102046    | 101997    |
| Sma-1-13288 | NW_003037978.1 | - | 250254    | 250205    |
| Sma-1-13289 | NS_000200.1    | + | 110705233 | 110705282 |
| Sma-1-13290 | NS_000200.1    | - | 209518264 | 209518215 |
| Sma-1-13291 | NS_000200.1    | - | 144621157 | 144621108 |
| Sma-1-13292 | NW_003037861.1 | - | 64115     | 64066     |
| Sma-1-13293 | NS_000200.1    | - | 104840569 | 104840520 |
| Sma-1-13294 | NW_003037887.1 | + | 919597    | 919646    |
| Sma-1-13295 | NS_000200.1    | + | 131383575 | 131383624 |
| Sma-1-13296 | NW_003037888.1 | - | 174968    | 174919    |
| Sma-1-13297 | NW_003038195.1 | - | 27776     | 27727     |
| Sma-1-13298 | NS_000200.1    | - | 303016548 | 303016499 |
| Sma-1-13299 | NS_000200.1    | - | 132383460 | 132383411 |
| Sma-1-13300 | NW_003037888.1 | + | 829169    | 829218    |
| Sma-1-13301 | NS_000200.1    | + | 133037661 | 133037710 |
| Sma-1-13302 | NW_003037856.1 | - | 152008    | 151959    |
| Sma-1-13303 | NS_000200.1    | - | 99509964  | 99509915  |
| Sma-1-13304 | NW_003037854.1 | + | 1511726   | 1511775   |
| Sma-1-13305 | NS_000200.1    | + | 98416147  | 98416196  |
| Sma-1-13306 | NW_003037854.1 | + | 1498835   | 1498884   |
| Sma-1-13307 | NW_003037918.1 | - | 26295     | 26246     |
| Sma-1-13308 | NS_000200.1    | + | 98403256  | 98403305  |
| Sma-1-13309 | NS_000200.1    | - | 166593285 | 166593236 |
| Sma-1-13310 | NW_003037854.1 | + | 1408510   | 1408559   |
| Sma-1-13311 | NS_000200.1    | + | 98312931  | 98312980  |
| Sma-1-13312 | NW_003038140.1 | + | 189933    | 189982    |

|             |                |   |           |           |
|-------------|----------------|---|-----------|-----------|
| Sma-1-13313 | NS_000200.1    | + | 286717810 | 286717859 |
| Sma-1-13314 | NW_003038156.1 | + | 38054     | 38103     |
| Sma-1-13315 | NS_000200.1    | + | 294770167 | 294770216 |
| Sma-1-13316 | NW_003026597.1 | - | 116623    | 116574    |
| Sma-1-13317 | NW_003037803.1 | + | 108502    | 108551    |
| Sma-1-13318 | NS_000200.1    | + | 23609039  | 23609088  |
| Sma-1-13319 | NS_000200.1    | - | 305737809 | 305737760 |
| Sma-1-13320 | NW_003037806.1 | - | 1792704   | 1792655   |
| Sma-1-13321 | NS_000200.1    | - | 29987918  | 29987869  |
| Sma-1-13322 | NW_003038155.1 | - | 412503    | 412454    |
| Sma-1-13323 | NS_000200.1    | - | 294535621 | 294535572 |
| Sma-1-13324 | NW_003037814.1 | - | 1557929   | 1557880   |
| Sma-1-13325 | NS_000200.1    | - | 44541789  | 44541740  |
| Sma-1-13326 | NW_003037852.1 | + | 707216    | 707265    |
| Sma-1-13327 | NS_000200.1    | + | 95099111  | 95099160  |
| Sma-1-13328 | NW_003037830.1 | - | 1367719   | 1367670   |
| Sma-1-13329 | NS_000200.1    | - | 69258090  | 69258041  |
| Sma-1-13330 | NW_003037827.1 | + | 107389    | 107438    |
| Sma-1-13331 | NS_000200.1    | + | 62729530  | 62729579  |
| Sma-1-13332 | NW_003037818.1 | - | 893105    | 893056    |
| Sma-1-13333 | NW_003038151.1 | + | 228700    | 228749    |
| Sma-1-13334 | NS_000200.1    | + | 292135943 | 292135992 |
| Sma-1-13335 | NS_000200.1    | - | 49608512  | 49608463  |
| Sma-1-13336 | NW_003037799.1 | + | 611883    | 611932    |
| Sma-1-13337 | NW_003037854.1 | + | 995091    | 995140    |
| Sma-1-13338 | NS_000200.1    | + | 17602237  | 17602286  |
| Sma-1-13339 | NS_000200.1    | + | 97899512  | 97899561  |
| Sma-1-13340 | NW_003037932.1 | + | 625159    | 625208    |
| Sma-1-13341 | NS_000200.1    | + | 178158355 | 178158404 |
| Sma-1-13342 | NW_003038187.1 | + | 4676      | 4725      |
| Sma-1-13343 | NS_000200.1    | + | 301956534 | 301956583 |
| Sma-1-13344 | NW_003026615.1 | + | 21835     | 21884     |
| Sma-1-13345 | NS_000200.1    | + | 317016276 | 317016325 |
| Sma-1-13346 | NW_003037979.1 | + | 600238    | 600287    |
| Sma-1-13347 | NS_000200.1    | + | 210661258 | 210661307 |
| Sma-1-13348 | NW_003038221.1 | - | 112010    | 111961    |
| Sma-1-13349 | NS_000200.1    | - | 308753274 | 308753225 |
| Sma-1-13350 | NW_003037810.1 | - | 883083    | 883034    |
| Sma-1-13351 | NW_003037810.1 | - | 879764    | 879715    |
| Sma-1-13352 | NW_003037901.1 | - | 355283    | 355234    |
| Sma-1-13353 | NW_003026510.1 | - | 309734    | 309685    |
| Sma-1-13354 | NS_000200.1    | - | 283749915 | 283749866 |
| Sma-1-13355 | NS_000200.1    | - | 146203744 | 146203695 |
| Sma-1-13356 | NS_000200.1    | - | 37487605  | 37487556  |
| Sma-1-13357 | NS_000200.1    | - | 37484286  | 37484237  |
| Sma-1-13358 | NW_003026517.1 | - | 574857    | 574808    |
| Sma-1-13359 | NS_000200.1    | - | 300180866 | 300180817 |
| Sma-1-13360 | NW_003038037.1 | + | 1272873   | 1272922   |
| Sma-1-13361 | NS_000200.1    | + | 251428282 | 251428331 |
| Sma-1-13362 | NW_003037841.1 | - | 374688    | 374639    |
| Sma-1-13363 | NS_000200.1    | - | 82985869  | 82985820  |
| Sma-1-13364 | NW_003038242.1 | + | 6890      | 6939      |

|             |                |   |           |           |
|-------------|----------------|---|-----------|-----------|
| Sma-1-13365 | NS_000200.1    | + | 314706036 | 314706085 |
| Sma-1-13366 | NW_003030423.1 | + | 939       | 988       |
| Sma-1-13367 | NS_000200.1    | + | 362869740 | 362869789 |
| Sma-1-13368 | NW_003037807.1 | - | 1404256   | 1404207   |
| Sma-1-13369 | NS_000200.1    | - | 31665772  | 31665723  |
| Sma-1-13370 | NW_003037806.1 | + | 54411     | 54460     |
| Sma-1-13371 | NS_000200.1    | + | 28249625  | 28249674  |
| Sma-1-13372 | NW_003037933.1 | + | 609511    | 609560    |
| Sma-1-13373 | NS_000200.1    | + | 179022683 | 179022732 |
| Sma-1-13374 | NW_003038032.1 | + | 410398    | 410447    |
| Sma-1-13375 | NW_003038050.1 | - | 90231     | 90182     |
| Sma-1-13376 | NS_000200.1    | + | 245569558 | 245569607 |
| Sma-1-13377 | NS_000200.1    | - | 256365125 | 256365076 |
| Sma-1-13378 | NW_003038038.1 | + | 1252123   | 1252172   |
| Sma-1-13379 | NS_000200.1    | + | 253155516 | 253155565 |
| Sma-1-13380 | NW_003038471.1 | - | 45575     | 45526     |
| Sma-1-13381 | NW_003038050.1 | - | 85544     | 85495     |
| Sma-1-13382 | NS_000200.1    | - | 331886489 | 331886440 |
| Sma-1-13383 | NS_000200.1    | - | 256360438 | 256360389 |
| Sma-1-13384 | NW_003037797.1 | - | 2834937   | 2834888   |
| Sma-1-13385 | NW_003037894.1 | + | 246882    | 246931    |
| Sma-1-13386 | NS_000200.1    | + | 142143455 | 142143504 |
| Sma-1-13387 | NS_000200.1    | - | 13262797  | 13262748  |
| Sma-1-13388 | NW_003037935.1 | + | 641639    | 641688    |
| Sma-1-13389 | NW_003037942.1 | - | 378048    | 377999    |
| Sma-1-13390 | NS_000200.1    | + | 180058174 | 180058223 |
| Sma-1-13391 | NS_000200.1    | - | 186137956 | 186137907 |
| Sma-1-13392 | NW_003037940.1 | + | 219589    | 219638    |
| Sma-1-13393 | NS_000200.1    | + | 183961719 | 183961768 |
| Sma-1-13394 | NW_003032100.1 | - | 1844      | 1795      |
| Sma-1-13395 | NS_000200.1    | - | 377734643 | 377734594 |
| Sma-1-13396 | NW_003038228.1 | - | 120331    | 120282    |
| Sma-1-13397 | NS_000200.1    | - | 310993611 | 310993562 |
| Sma-1-13398 | NW_003038075.1 | - | 26083     | 26034     |
| Sma-1-13399 | NS_000200.1    | - | 266144294 | 266144245 |
| Sma-1-13400 | NW_003038511.1 | - | 128840    | 128791    |
| Sma-1-13401 | NW_003037862.1 | - | 298088    | 298039    |
| Sma-1-13402 | NW_003037941.1 | - | 479000    | 478951    |
| Sma-1-13403 | NW_003039127.1 | - | 1047578   | 1047529   |
| Sma-1-13404 | NS_000200.1    | - | 338474052 | 338474003 |
| Sma-1-13405 | NS_000200.1    | - | 185213474 | 185213425 |
| Sma-1-13406 | NS_000200.1    | - | 114125077 | 114125028 |
| Sma-1-13407 | NS_000200.1    | - | 105949749 | 105949700 |
| Sma-1-13408 | NW_003039129.1 | + | 231288    | 231337    |
| Sma-1-13409 | NS_000200.1    | + | 229186096 | 229186145 |
| Sma-1-13410 | NW_003037796.1 | - | 1996602   | 1996553   |
| Sma-1-13411 | NS_000200.1    | - | 10206246  | 10206197  |
| Sma-1-13412 | NW_003037827.1 | + | 454750    | 454799    |
| Sma-1-13413 | NS_000200.1    | + | 63076891  | 63076940  |
| Sma-1-13414 | NW_003037852.1 | + | 764492    | 764541    |
| Sma-1-13415 | NS_000200.1    | + | 95156387  | 95156436  |
| Sma-1-13416 | NW_003037891.1 | - | 1118215   | 1118166   |



|             |                |   |           |           |
|-------------|----------------|---|-----------|-----------|
| Sma-1-13417 | NS_000200.1    | - | 138999493 | 138999444 |
| Sma-1-13418 | NW_003037912.1 | - | 133633    | 133584    |
| Sma-1-13419 | NS_000200.1    | - | 156945208 | 156945159 |
| Sma-1-13420 | NW_003038037.1 | - | 833603    | 833554    |
| Sma-1-13421 | NS_000200.1    | - | 250989012 | 250988963 |
| Sma-1-13422 | NW_003038119.1 | - | 134949    | 134900    |
| Sma-1-13423 | NS_000200.1    | - | 278042505 | 278042456 |
| Sma-1-13424 | NW_003035880.1 | - | 42568     | 42519     |
| Sma-1-13425 | NS_000200.1    | - | 339283632 | 339283583 |
| Sma-1-13426 | NW_003038016.1 | - | 154719    | 154670    |
| Sma-1-13427 | NS_000200.1    | - | 231271256 | 231271207 |
| Sma-1-13428 | NW_003037821.1 | - | 34230     | 34181     |
| Sma-1-13429 | NS_000200.1    | - | 53178714  | 53178665  |
| Sma-1-13430 | NW_003037850.1 | - | 388241    | 388192    |
| Sma-1-13431 | NS_000200.1    | - | 92374271  | 92374222  |
| Sma-1-13432 | NW_003037850.1 | - | 442740    | 442691    |
| Sma-1-13433 | NW_003037967.1 | - | 78452     | 78403     |
| Sma-1-13434 | NS_000200.1    | - | 199318423 | 199318374 |
| Sma-1-13435 | NS_000200.1    | - | 92428770  | 92428721  |
| Sma-1-13436 | NW_003037852.1 | - | 892206    | 892157    |
| Sma-1-13437 | NW_003037887.1 | + | 964216    | 964265    |
| Sma-1-13438 | NW_003026498.1 | - | 23892     | 23843     |
| Sma-1-13439 | NW_003038163.1 | - | 664157    | 664108    |
| Sma-1-13440 | NS_000200.1    | + | 131428194 | 131428243 |
| Sma-1-13441 | NS_000200.1    | - | 299064437 | 299064388 |
| Sma-1-13442 | NS_000200.1    | - | 275011747 | 275011698 |
| Sma-1-13443 | NS_000200.1    | - | 95284101  | 95284052  |
| Sma-1-13444 | NW_003038251.1 | + | 328137    | 328186    |
| Sma-1-13445 | NS_000200.1    | + | 318659909 | 318659958 |
| Sma-1-13446 | NW_003037799.1 | - | 1502483   | 1502434   |
| Sma-1-13447 | NS_000200.1    | - | 18492837  | 18492788  |
| Sma-1-13448 | NW_003038067.1 | + | 89791     | 89840     |
| Sma-1-13449 | NS_000200.1    | + | 262943844 | 262943893 |
| Sma-1-13450 | NW_003037822.1 | - | 29840     | 29791     |
| Sma-1-13451 | NW_003037909.1 | + | 334459    | 334508    |
| Sma-1-13452 | NS_000200.1    | + | 153876108 | 153876157 |
| Sma-1-13453 | NS_000200.1    | - | 54337846  | 54337797  |
| Sma-1-13454 | NW_003037894.1 | - | 232999    | 232950    |
| Sma-1-13455 | NW_003038082.1 | + | 219572    | 219621    |
| Sma-1-13456 | NS_000200.1    | + | 269754795 | 269754844 |
| Sma-1-13457 | NS_000200.1    | - | 142129572 | 142129523 |
| Sma-1-13458 | NW_003037894.1 | - | 446164    | 446115    |
| Sma-1-13459 | NS_000200.1    | - | 142342737 | 142342688 |
| Sma-1-13460 | NW_003029195.1 | - | 1036      | 987       |
| Sma-1-13461 | NS_000200.1    | - | 357064591 | 357064542 |
| Sma-1-13462 | NW_003035328.1 | + | 220       | 269       |
| Sma-1-13463 | NS_000200.1    | + | 367276384 | 367276433 |
| Sma-1-13464 | NW_003038514.1 | + | 93402     | 93451     |
| Sma-1-13465 | NS_000200.1    | + | 339717941 | 339717990 |
| Sma-1-13466 | NW_003037898.1 | - | 157543    | 157494    |
| Sma-1-13467 | NW_003037993.1 | + | 38938     | 38987     |
| Sma-1-13468 | NS_000200.1    | + | 218225641 | 218225690 |

|             |                |   |           |           |
|-------------|----------------|---|-----------|-----------|
| Sma-1-13469 | NS_000200.1    | - | 144141365 | 144141316 |
| Sma-1-13470 | NW_003037899.1 | - | 152396    | 152347    |
| Sma-1-13471 | NS_000200.1    | - | 144671507 | 144671458 |
| Sma-1-13472 | NW_003037899.1 | - | 550954    | 550905    |
| Sma-1-13473 | NW_003037904.1 | + | 163352    | 163401    |
| Sma-1-13474 | NW_003038057.1 | + | 183682    | 183731    |
| Sma-1-13475 | NS_000200.1    | + | 148877851 | 148877900 |
| Sma-1-13476 | NS_000200.1    | + | 259389498 | 259389547 |
| Sma-1-13477 | NS_000200.1    | - | 145070065 | 145070016 |
| Sma-1-13478 | NW_003037836.1 | + | 365891    | 365940    |
| Sma-1-13479 | NS_000200.1    | + | 75922990  | 75923039  |
| Sma-1-13480 | NW_003037910.1 | + | 1217323   | 1217372   |
| Sma-1-13481 | NW_003038513.1 | + | 108604    | 108653    |
| Sma-1-13482 | NS_000200.1    | + | 155729298 | 155729347 |
| Sma-1-13483 | NS_000200.1    | + | 339117781 | 339117830 |
| Sma-1-13484 | NW_003037911.1 | + | 17905     | 17954     |
| Sma-1-13485 | NS_000200.1    | + | 155805258 | 155805307 |
| Sma-1-13486 | NW_003037946.1 | + | 589399    | 589448    |
| Sma-1-13487 | NS_000200.1    | + | 191283259 | 191283308 |
| Sma-1-13488 | NW_003026464.1 | - | 150022    | 149973    |
| Sma-1-13489 | NS_000200.1    | - | 203450331 | 203450282 |
| Sma-1-13490 | NW_003025461.1 | + | 184       | 233       |
| Sma-1-13491 | NW_003027227.1 | + | 290       | 339       |
| Sma-1-13492 | NW_003038078.1 | + | 40626     | 40675     |
| Sma-1-13493 | NS_000200.1    | + | 267246829 | 267246878 |
| Sma-1-13494 | NS_000200.1    | + | 352750690 | 352750739 |
| Sma-1-13495 | NS_000200.1    | + | 353298574 | 353298623 |
| Sma-1-13496 | NW_003025431.1 | + | 207       | 256       |
| Sma-1-13497 | NS_000200.1    | + | 352691282 | 352691331 |
| Sma-1-13498 | NW_003038011.1 | + | 437987    | 438036    |
| Sma-1-13499 | NW_003038057.1 | - | 155715    | 155666    |
| Sma-1-13500 | NS_000200.1    | + | 227965637 | 227965686 |
| Sma-1-13501 | NS_000200.1    | - | 259361531 | 259361482 |
| Sma-1-13502 | NW_003038020.1 | - | 258150    | 258101    |
| Sma-1-13503 | NW_003038261.1 | + | 486544    | 486593    |
| Sma-1-13504 | NS_000200.1    | + | 324100195 | 324100244 |
| Sma-1-13505 | NS_000200.1    | - | 234225494 | 234225445 |
| Sma-1-13506 | NW_003023422.1 | + | 232       | 281       |
| Sma-1-13507 | NW_003029015.1 | - | 1583      | 1534      |
| Sma-1-13508 | NW_003032240.1 | - | 934       | 885       |
| Sma-1-13509 | NW_003026458.1 | - | 239738    | 239689    |
| Sma-1-13510 | NW_003037797.1 | + | 133385    | 133434    |
| Sma-1-13511 | NW_003037797.1 | + | 1603662   | 1603711   |
| Sma-1-13512 | NW_003037807.1 | - | 538542    | 538493    |
| Sma-1-13513 | NW_003037853.1 | - | 1368179   | 1368130   |
| Sma-1-13514 | NW_003037886.1 | + | 256524    | 256573    |
| Sma-1-13515 | NW_003037908.1 | + | 656674    | 656723    |
| Sma-1-13516 | NW_003037915.1 | + | 377052    | 377101    |
| Sma-1-13517 | NW_003037923.1 | - | 357653    | 357604    |
| Sma-1-13518 | NW_003038018.1 | - | 76700     | 76651     |
| Sma-1-13519 | NW_003038028.1 | + | 457647    | 457696    |
| Sma-1-13520 | NW_003038067.1 | - | 25324     | 25275     |

|             |                |   |           |           |
|-------------|----------------|---|-----------|-----------|
| Sma-1-13521 | NW_003038117.1 | - | 164623    | 164574    |
| Sma-1-13522 | NW_003038130.1 | + | 357280    | 357329    |
| Sma-1-13523 | NS_000200.1    | + | 10561245  | 10561294  |
| Sma-1-13524 | NS_000200.1    | + | 12031522  | 12031571  |
| Sma-1-13525 | NS_000200.1    | + | 129512091 | 129512140 |
| Sma-1-13526 | NS_000200.1    | + | 153129805 | 153129854 |
| Sma-1-13527 | NS_000200.1    | + | 162277038 | 162277087 |
| Sma-1-13528 | NS_000200.1    | + | 241765221 | 241765270 |
| Sma-1-13529 | NS_000200.1    | + | 281912266 | 281912315 |
| Sma-1-13530 | NS_000200.1    | + | 373336911 | 373336960 |
| Sma-1-13531 | NS_000200.1    | - | 375167044 | 375166995 |
| Sma-1-13532 | NS_000200.1    | - | 357982211 | 357982162 |
| Sma-1-13533 | NS_000200.1    | - | 277482448 | 277482399 |
| Sma-1-13534 | NS_000200.1    | - | 262879377 | 262879328 |
| Sma-1-13535 | NS_000200.1    | - | 232477550 | 232477501 |
| Sma-1-13536 | NS_000200.1    | - | 171413866 | 171413817 |
| Sma-1-13537 | NS_000200.1    | - | 102107968 | 102107919 |
| Sma-1-13538 | NS_000200.1    | - | 96860230  | 96860181  |
| Sma-1-13539 | NS_000200.1    | - | 30800058  | 30800009  |
| Sma-1-13540 | NW_003026517.1 | - | 446323    | 446274    |
| Sma-1-13541 | NS_000200.1    | - | 300052332 | 300052283 |
| Sma-1-13542 | NW_003037835.1 | + | 556059    | 556108    |
| Sma-1-13543 | NS_000200.1    | + | 74952567  | 74952616  |
| Sma-1-13544 | NW_003037933.1 | + | 212152    | 212201    |
| Sma-1-13545 | NS_000200.1    | + | 178625324 | 178625373 |
| Sma-1-13546 | NW_003037936.1 | - | 703952    | 703903    |
| Sma-1-13547 | NS_000200.1    | - | 181143681 | 181143632 |
| Sma-1-13548 | NW_003029748.1 | - | 1107      | 1058      |
| Sma-1-13549 | NS_000200.1    | - | 366534262 | 366534213 |
| Sma-1-13550 | NW_003038023.1 | + | 470355    | 470404    |
| Sma-1-13551 | NS_000200.1    | + | 237630646 | 237630695 |
| Sma-1-13552 | NW_003037871.1 | + | 165746    | 165795    |
| Sma-1-13553 | NS_000200.1    | + | 117613484 | 117613533 |
| Sma-1-13554 | NW_003026490.1 | - | 138140    | 138091    |
| Sma-1-13555 | NS_000200.1    | - | 267769856 | 267769807 |
| Sma-1-13556 | NW_003037806.1 | - | 1291607   | 1291558   |
| Sma-1-13557 | NS_000200.1    | - | 29486821  | 29486772  |
| Sma-1-13558 | NW_003037810.1 | - | 1007738   | 1007689   |
| Sma-1-13559 | NW_003038150.1 | + | 12268     | 12317     |
| Sma-1-13560 | NS_000200.1    | + | 291491006 | 291491055 |
| Sma-1-13561 | NS_000200.1    | - | 37612260  | 37612211  |
| Sma-1-13562 | NW_003026617.1 | + | 329940    | 329989    |
| Sma-1-13563 | NS_000200.1    | + | 319900799 | 319900848 |
| Sma-1-13564 | NW_003037978.1 | + | 377849    | 377898    |
| Sma-1-13565 | NS_000200.1    | + | 209645859 | 209645908 |
| Sma-1-13566 | NW_003038077.1 | + | 208316    | 208365    |
| Sma-1-13567 | NS_000200.1    | + | 266979956 | 266980005 |
| Sma-1-13568 | NW_003022752.1 | + | 521       | 570       |
| Sma-1-13569 | NW_003038137.1 | + | 114671    | 114720    |
| Sma-1-13570 | NS_000200.1    | + | 284903567 | 284903616 |
| Sma-1-13571 | NS_000200.1    | + | 368037715 | 368037764 |
| Sma-1-13572 | NW_003037800.1 | - | 1659163   | 1659114   |

|             |                |   |           |           |
|-------------|----------------|---|-----------|-----------|
| Sma-1-13573 | NS_000200.1    | - | 20288523  | 20288474  |
| Sma-1-13574 | NW_003037809.1 | + | 128522    | 128571    |
| Sma-1-13575 | NS_000200.1    | + | 33792986  | 33793035  |
| Sma-1-13576 | NW_003037834.1 | - | 643397    | 643348    |
| Sma-1-13577 | NS_000200.1    | - | 73803883  | 73803834  |
| Sma-1-13578 | NW_003037834.1 | - | 293596    | 293547    |
| Sma-1-13579 | NW_003026508.1 | - | 32648     | 32599     |
| Sma-1-13580 | NS_000200.1    | - | 281077262 | 281077213 |
| Sma-1-13581 | NS_000200.1    | - | 73454082  | 73454033  |
| Sma-1-13582 | NW_003037834.1 | - | 119940    | 119891    |
| Sma-1-13583 | NS_000200.1    | - | 73280426  | 73280377  |
| Sma-1-13584 | NW_003037903.1 | - | 1011285   | 1011236   |
| Sma-1-13585 | NS_000200.1    | - | 148565366 | 148565317 |
| Sma-1-13586 | NW_003038163.1 | - | 642305    | 642256    |
| Sma-1-13587 | NS_000200.1    | - | 299042585 | 299042536 |
| Sma-1-13588 | NW_003038153.1 | + | 224713    | 224762    |
| Sma-1-13589 | NS_000200.1    | + | 293286762 | 293286811 |
| Sma-1-13590 | NW_003035166.1 | + | 140       | 189       |
| Sma-1-13591 | NW_003037981.1 | + | 338646    | 338695    |
| Sma-1-13592 | NS_000200.1    | + | 212736514 | 212736563 |
| Sma-1-13593 | NS_000200.1    | + | 370722718 | 370722767 |
| Sma-1-13594 | NW_003037830.1 | + | 544475    | 544524    |
| Sma-1-13595 | NS_000200.1    | + | 68434846  | 68434895  |
| Sma-1-13596 | NW_003037830.1 | + | 408313    | 408362    |
| Sma-1-13597 | NS_000200.1    | + | 68298684  | 68298733  |
| Sma-1-13598 | NW_003037906.1 | - | 482336    | 482287    |
| Sma-1-13599 | NS_000200.1    | - | 150790115 | 150790066 |
| Sma-1-13600 | NW_003037827.1 | + | 2455813   | 2455862   |
| Sma-1-13601 | NS_000200.1    | + | 65077954  | 65078003  |
| Sma-1-13602 | NW_003037825.1 | - | 1427300   | 1427251   |
| Sma-1-13603 | NS_000200.1    | - | 60557082  | 60557033  |
| Sma-1-13604 | NW_003037821.1 | + | 63256     | 63305     |
| Sma-1-13605 | NS_000200.1    | + | 53207740  | 53207789  |
| Sma-1-13606 | NW_003037820.1 | - | 62691     | 62642     |
| Sma-1-13607 | NW_003026488.1 | + | 300526    | 300575    |
| Sma-1-13608 | NS_000200.1    | + | 263807020 | 263807069 |
| Sma-1-13609 | NS_000200.1    | - | 52335673  | 52335624  |
| Sma-1-13610 | NW_003037918.1 | + | 1799589   | 1799638   |
| Sma-1-13611 | NS_000200.1    | + | 168366579 | 168366628 |
| Sma-1-13612 | NW_003037141.1 | - | 752       | 703       |
| Sma-1-13613 | NS_000200.1    | - | 361699489 | 361699440 |
| Sma-1-13614 | NW_003026458.1 | - | 490705    | 490656    |
| Sma-1-13615 | NS_000200.1    | - | 102358935 | 102358886 |
| Sma-1-13616 | NW_003038024.1 | + | 531974    | 532023    |
| Sma-1-13617 | NS_000200.1    | + | 238429003 | 238429052 |
| Sma-1-13618 | NW_003038803.1 | + | 248053    | 248102    |
| Sma-1-13619 | NS_000200.1    | + | 244525811 | 244525860 |
| Sma-1-13620 | NW_003037873.1 | - | 76869     | 76820     |
| Sma-1-13621 | NS_000200.1    | - | 118815997 | 118815948 |
| Sma-1-13622 | NW_003037912.1 | + | 662243    | 662292    |
| Sma-1-13623 | NS_000200.1    | + | 157473818 | 157473867 |
| Sma-1-13624 | NW_003037914.1 | - | 807270    | 807221    |

|             |                |   |           |           |
|-------------|----------------|---|-----------|-----------|
| Sma-1-13625 | NW_003026487.1 | + | 122837    | 122886    |
| Sma-1-13626 | NS_000200.1    | + | 261033531 | 261033580 |
| Sma-1-13627 | NS_000200.1    | - | 160951520 | 160951471 |
| Sma-1-13628 | NW_003037814.1 | + | 1376793   | 1376842   |
| Sma-1-13629 | NS_000200.1    | + | 44360653  | 44360702  |
| Sma-1-13630 | NW_003037813.1 | - | 972764    | 972715    |
| Sma-1-13631 | NS_000200.1    | - | 41959627  | 41959578  |
| Sma-1-13632 | NW_003037809.1 | + | 495665    | 495714    |
| Sma-1-13633 | NS_000200.1    | + | 34160129  | 34160178  |
| Sma-1-13634 | NW_003037917.1 | + | 738605    | 738654    |
| Sma-1-13635 | NS_000200.1    | + | 165775409 | 165775458 |
| Sma-1-13636 | NW_003037918.1 | + | 1522361   | 1522410   |
| Sma-1-13637 | NS_000200.1    | + | 168089351 | 168089400 |
| Sma-1-13638 | NW_003037918.1 | + | 904959    | 905008    |
| Sma-1-13639 | NS_000200.1    | + | 167471949 | 167471998 |
| Sma-1-13640 | NW_003037789.1 | + | 44775     | 44824     |
| Sma-1-13641 | NS_000200.1    | + | 380829395 | 380829444 |
| Sma-1-13642 | NW_003038240.1 | + | 21595     | 21644     |
| Sma-1-13643 | NS_000200.1    | + | 314160526 | 314160575 |
| Sma-1-13644 | NW_003023042.1 | + | 4883      | 4932      |
| Sma-1-13645 | NS_000200.1    | + | 372231547 | 372231596 |
| Sma-1-13646 | NW_003038462.1 | + | 43094     | 43143     |
| Sma-1-13647 | NS_000200.1    | + | 331410757 | 331410806 |
| Sma-1-13648 | NW_003038056.1 | + | 100137    | 100186    |
| Sma-1-13649 | NS_000200.1    | + | 259077788 | 259077837 |
| Sma-1-13650 | NW_003039127.1 | - | 2058270   | 2058221   |
| Sma-1-13651 | NS_000200.1    | - | 115135769 | 115135720 |
| Sma-1-13652 | NW_003035817.1 | - | 4369      | 4320      |
| Sma-1-13653 | NW_003037992.1 | + | 188970    | 189019    |
| Sma-1-13654 | NS_000200.1    | + | 218030451 | 218030500 |
| Sma-1-13655 | NS_000200.1    | - | 364155238 | 364155189 |
| Sma-1-13656 | NW_003038008.1 | - | 415049    | 415000    |
| Sma-1-13657 | NS_000200.1    | - | 226088145 | 226088096 |
| Sma-1-13658 | NW_003037803.1 | + | 1309619   | 1309668   |
| Sma-1-13659 | NS_000200.1    | + | 24810156  | 24810205  |
| Sma-1-13660 | NW_003037805.1 | + | 1621369   | 1621418   |
| Sma-1-13661 | NW_003037825.1 | - | 1666855   | 1666806   |
| Sma-1-13662 | NW_003037890.1 | + | 845791    | 845840    |
| Sma-1-13663 | NW_003038024.1 | - | 803814    | 803765    |
| Sma-1-13664 | NS_000200.1    | + | 28179213  | 28179262  |
| Sma-1-13665 | NS_000200.1    | + | 136529152 | 136529201 |
| Sma-1-13666 | NS_000200.1    | - | 238700843 | 238700794 |
| Sma-1-13667 | NS_000200.1    | - | 60796637  | 60796588  |
| Sma-1-13668 | NW_003037926.1 | - | 5211      | 5162      |
| Sma-1-13669 | NS_000200.1    | - | 173173481 | 173173432 |
| Sma-1-13670 | NW_003037798.1 | + | 770179    | 770228    |
| Sma-1-13671 | NS_000200.1    | + | 15029337  | 15029386  |
| Sma-1-13672 | NW_003037934.1 | + | 224800    | 224849    |
| Sma-1-13673 | NS_000200.1    | + | 179271547 | 179271596 |
| Sma-1-13674 | NW_003037118.1 | + | 46        | 95        |
| Sma-1-13675 | NW_003038015.1 | + | 187736    | 187785    |
| Sma-1-13676 | NS_000200.1    | + | 230511226 | 230511275 |

|             |                |   |           |           |
|-------------|----------------|---|-----------|-----------|
| Sma-1-13677 | NS_000200.1    | + | 361201123 | 361201172 |
| Sma-1-13678 | NW_003037787.1 | - | 3748      | 3699      |
| Sma-1-13679 | NS_000200.1    | - | 380251917 | 380251868 |
| Sma-1-13680 | NW_003039127.1 | + | 1297552   | 1297601   |
| Sma-1-13681 | NS_000200.1    | + | 114375051 | 114375100 |
| Sma-1-13682 | NW_003037831.1 | + | 854375    | 854424    |
| Sma-1-13683 | NS_000200.1    | + | 70303677  | 70303726  |
| Sma-1-13684 | NW_003033063.1 | + | 227       | 276       |
| Sma-1-13685 | NW_003037944.1 | + | 229924    | 229973    |
| Sma-1-13686 | NS_000200.1    | + | 188451277 | 188451326 |
| Sma-1-13687 | NS_000200.1    | + | 326302004 | 326302053 |
| Sma-1-13688 | NW_003037965.1 | - | 140300    | 140251    |
| Sma-1-13689 | NS_000200.1    | - | 198429385 | 198429336 |
| Sma-1-13690 | NW_003026458.1 | - | 471925    | 471876    |
| Sma-1-13691 | NS_000200.1    | - | 102340155 | 102340106 |
| Sma-1-13692 | NW_003037918.1 | + | 1525376   | 1525425   |
| Sma-1-13693 | NW_003038115.1 | + | 75847     | 75896     |
| Sma-1-13694 | NS_000200.1    | + | 168092366 | 168092415 |
| Sma-1-13695 | NS_000200.1    | + | 277131142 | 277131191 |
| Sma-1-13696 | NW_003026574.1 | + | 90393     | 90442     |
| Sma-1-13697 | NS_000200.1    | + | 301897726 | 301897775 |
| Sma-1-13698 | NW_003037998.1 | - | 209273    | 209224    |
| Sma-1-13699 | NS_000200.1    | - | 221495869 | 221495820 |
| Sma-1-13700 | NW_003039130.1 | + | 24710     | 24759     |
| Sma-1-13701 | NS_000200.1    | + | 317699321 | 317699370 |
| Sma-1-13702 | NW_003037914.1 | - | 1254991   | 1254942   |
| Sma-1-13703 | NS_000200.1    | - | 161399241 | 161399192 |
| Sma-1-13704 | NW_003022684.1 | - | 372       | 323       |
| Sma-1-13705 | NW_003037809.1 | + | 1792027   | 1792076   |
| Sma-1-13706 | NW_003037826.1 | + | 1183473   | 1183522   |
| Sma-1-13707 | NW_003037932.1 | - | 514623    | 514574    |
| Sma-1-13708 | NW_003037932.1 | - | 511750    | 511701    |
| Sma-1-13709 | NW_003038037.1 | + | 66554     | 66603     |
| Sma-1-13710 | NW_003038239.1 | - | 19574     | 19525     |
| Sma-1-13711 | NW_003038068.1 | + | 148319    | 148368    |
| Sma-1-13712 | NW_003038079.1 | - | 269172    | 269123    |
| Sma-1-13713 | NS_000200.1    | + | 35456491  | 35456540  |
| Sma-1-13714 | NS_000200.1    | + | 62182989  | 62183038  |
| Sma-1-13715 | NS_000200.1    | + | 250221963 | 250222012 |
| Sma-1-13716 | NS_000200.1    | + | 263215527 | 263215576 |
| Sma-1-13717 | NS_000200.1    | - | 365418554 | 365418505 |
| Sma-1-13718 | NS_000200.1    | - | 313860356 | 313860307 |
| Sma-1-13719 | NS_000200.1    | - | 268399160 | 268399111 |
| Sma-1-13720 | NS_000200.1    | - | 178047819 | 178047770 |
| Sma-1-13721 | NS_000200.1    | - | 178044946 | 178044897 |
| Sma-1-13722 | NW_003026511.1 | + | 30        | 79        |
| Sma-1-13723 | NS_000200.1    | + | 284383082 | 284383131 |
| Sma-1-13724 | NW_003038053.1 | - | 329879    | 329830    |
| Sma-1-13725 | NS_000200.1    | - | 257689974 | 257689925 |
| Sma-1-13726 | NW_003038145.1 | + | 327865    | 327914    |
| Sma-1-13727 | NS_000200.1    | + | 288939288 | 288939337 |
| Sma-1-13728 | NW_003026456.1 | + | 947605    | 947654    |

|             |                |   |           |           |
|-------------|----------------|---|-----------|-----------|
| Sma-1-13729 | NW_003037811.1 | - | 676686    | 676637    |
| Sma-1-13730 | NW_003038042.1 | - | 157434    | 157385    |
| Sma-1-13731 | NS_000200.1    | + | 58870741  | 58870790  |
| Sma-1-13732 | NS_000200.1    | - | 254103033 | 254102984 |
| Sma-1-13733 | NS_000200.1    | - | 38846928  | 38846879  |
| Sma-1-13734 | NW_003038067.1 | + | 149622    | 149671    |
| Sma-1-13735 | NS_000200.1    | + | 263003675 | 263003724 |
| Sma-1-13736 | NW_003037920.1 | + | 280697    | 280746    |
| Sma-1-13737 | NW_003038235.1 | + | 48974     | 49023     |
| Sma-1-13738 | NW_003037796.1 | + | 2013049   | 2013098   |
| Sma-1-13739 | NW_003037832.1 | + | 611551    | 611600    |
| Sma-1-13740 | NW_003037835.1 | + | 696452    | 696501    |
| Sma-1-13741 | NW_003037891.1 | + | 391619    | 391668    |
| Sma-1-13742 | NW_003037905.1 | + | 1000242   | 1000291   |
| Sma-1-13743 | NW_003037913.1 | - | 1028887   | 1028838   |
| Sma-1-13744 | NW_003037913.1 | - | 764126    | 764077    |
| Sma-1-13745 | NW_003037923.1 | + | 394070    | 394119    |
| Sma-1-13746 | NW_003038083.1 | + | 17099     | 17148     |
| Sma-1-13747 | NW_003038083.1 | - | 17009     | 16960     |
| Sma-1-13748 | NS_000200.1    | + | 10222693  | 10222742  |
| Sma-1-13749 | NS_000200.1    | + | 71820982  | 71821031  |
| Sma-1-13750 | NS_000200.1    | + | 75092960  | 75093009  |
| Sma-1-13751 | NS_000200.1    | + | 138272897 | 138272946 |
| Sma-1-13752 | NS_000200.1    | + | 150269254 | 150269303 |
| Sma-1-13753 | NS_000200.1    | + | 169461504 | 169461553 |
| Sma-1-13754 | NS_000200.1    | + | 171450283 | 171450332 |
| Sma-1-13755 | NS_000200.1    | + | 270260436 | 270260485 |
| Sma-1-13756 | NS_000200.1    | + | 313114565 | 313114614 |
| Sma-1-13757 | NS_000200.1    | - | 270260346 | 270260297 |
| Sma-1-13758 | NS_000200.1    | - | 159592638 | 159592589 |
| Sma-1-13759 | NS_000200.1    | - | 159327877 | 159327828 |
| Sma-1-13760 | NW_003037944.1 | + | 24144     | 24193     |
| Sma-1-13761 | NS_000200.1    | + | 188245497 | 188245546 |
| Sma-1-13762 | NW_003035793.1 | - | 560       | 511       |
| Sma-1-13763 | NS_000200.1    | - | 364101546 | 364101497 |
| Sma-1-13764 | NW_003037797.1 | - | 2908999   | 2908950   |
| Sma-1-13765 | NS_000200.1    | - | 13336859  | 13336810  |
| Sma-1-13766 | NW_003037827.1 | + | 1106559   | 1106608   |
| Sma-1-13767 | NS_000200.1    | + | 63728700  | 63728749  |
| Sma-1-13768 | NW_003037937.1 | + | 239581    | 239630    |
| Sma-1-13769 | NS_000200.1    | + | 181439490 | 181439539 |
| Sma-1-13770 | NW_003038163.1 | + | 623521    | 623570    |
| Sma-1-13771 | NS_000200.1    | + | 299023801 | 299023850 |
| Sma-1-13772 | NW_003024922.1 | + | 186       | 235       |
| Sma-1-13773 | NW_003038026.1 | + | 488039    | 488088    |
| Sma-1-13774 | NS_000200.1    | + | 239995800 | 239995849 |
| Sma-1-13775 | NS_000200.1    | + | 355711170 | 355711219 |
| Sma-1-13776 | NW_003037796.1 | + | 1033836   | 1033885   |
| Sma-1-13777 | NS_000200.1    | + | 9243480   | 9243529   |
| Sma-1-13778 | NW_003037793.1 | - | 880165    | 880116    |
| Sma-1-13779 | NS_000200.1    | - | 880165    | 880116    |
| Sma-1-13780 | NW_003037939.1 | - | 823658    | 823609    |

|             |                |   |           |           |
|-------------|----------------|---|-----------|-----------|
| Sma-1-13781 | NS_000200.1    | - | 183693412 | 183693363 |
| Sma-1-13782 | NW_003038518.1 | - | 220447    | 220398    |
| Sma-1-13783 | NS_000200.1    | - | 341857280 | 341857231 |
| Sma-1-13784 | NW_003037945.1 | + | 942790    | 942839    |
| Sma-1-13785 | NS_000200.1    | + | 190044754 | 190044803 |
| Sma-1-13786 | NW_003037962.1 | - | 315038    | 314989    |
| Sma-1-13787 | NS_000200.1    | - | 196391881 | 196391832 |
| Sma-1-13788 | NW_003038025.1 | + | 429241    | 429290    |
| Sma-1-13789 | NS_000200.1    | + | 239287486 | 239287535 |
| Sma-1-13790 | NW_003037829.1 | - | 1567055   | 1567006   |
| Sma-1-13791 | NW_003037909.1 | + | 750665    | 750714    |
| Sma-1-13792 | NS_000200.1    | + | 154292314 | 154292363 |
| Sma-1-13793 | NS_000200.1    | - | 67467593  | 67467544  |
| Sma-1-13794 | NW_003038034.1 | + | 819582    | 819631    |
| Sma-1-13795 | NS_000200.1    | + | 247761338 | 247761387 |
| Sma-1-13796 | NW_003035879.1 | - | 55226     | 55177     |
| Sma-1-13797 | NS_000200.1    | - | 338022553 | 338022504 |
| Sma-1-13798 | NW_003037971.1 | - | 619016    | 618967    |
| Sma-1-13799 | NS_000200.1    | - | 202241066 | 202241017 |
| Sma-1-13800 | NW_003026617.1 | + | 353026    | 353075    |
| Sma-1-13801 | NS_000200.1    | + | 319923885 | 319923934 |
| Sma-1-13802 | NW_003037982.1 | - | 674728    | 674679    |
| Sma-1-13803 | NS_000200.1    | - | 214333923 | 214333874 |
| Sma-1-13804 | NW_003037940.1 | + | 789314    | 789363    |
| Sma-1-13805 | NW_003037974.1 | + | 832167    | 832216    |
| Sma-1-13806 | NS_000200.1    | + | 184531444 | 184531493 |
| Sma-1-13807 | NS_000200.1    | + | 205507473 | 205507522 |
| Sma-1-13808 | NW_003038149.1 | + | 7980      | 8029      |
| Sma-1-13809 | NS_000200.1    | + | 291036593 | 291036642 |
| Sma-1-13810 | NW_003022248.1 | + | 5033      | 5082      |
| Sma-1-13811 | NS_000200.1    | + | 361017519 | 361017568 |
| Sma-1-13812 | NW_003037981.1 | - | 332814    | 332765    |
| Sma-1-13813 | NS_000200.1    | - | 212730682 | 212730633 |
| Sma-1-13814 | NW_003038009.1 | + | 296189    | 296238    |
| Sma-1-13815 | NS_000200.1    | + | 226670252 | 226670301 |
| Sma-1-13816 | NW_003037793.1 | - | 2022964   | 2022915   |
| Sma-1-13817 | NS_000200.1    | - | 2022964   | 2022915   |
| Sma-1-13818 | NW_003038007.1 | - | 263798    | 263749    |
| Sma-1-13819 | NS_000200.1    | - | 225512353 | 225512304 |
| Sma-1-13820 | NW_003038224.1 | + | 108211    | 108260    |
| Sma-1-13821 | NS_000200.1    | + | 309519939 | 309519988 |
| Sma-1-13822 | NW_003036041.1 | - | 3258      | 3209      |
| Sma-1-13823 | NW_003026599.1 | + | 130567    | 130616    |
| Sma-1-13824 | NW_003026458.1 | - | 394277    | 394228    |
| Sma-1-13825 | NW_003037886.1 | + | 1117130   | 1117179   |
| Sma-1-13826 | NW_003037939.1 | + | 592036    | 592085    |
| Sma-1-13827 | NW_003038515.1 | + | 215328    | 215377    |
| Sma-1-13828 | NW_003038076.1 | + | 252363    | 252412    |
| Sma-1-13829 | NW_003038141.1 | + | 218545    | 218594    |
| Sma-1-13830 | NW_003038141.1 | + | 219754    | 219803    |
| Sma-1-13831 | NW_003038141.1 | + | 270607    | 270656    |
| Sma-1-13832 | NS_000200.1    | + | 130372697 | 130372746 |



|             |                |   |           |           |
|-------------|----------------|---|-----------|-----------|
| Sma-1-13833 | NS_000200.1    | + | 183461790 | 183461839 |
| Sma-1-13834 | NS_000200.1    | + | 266469537 | 266469586 |
| Sma-1-13835 | NS_000200.1    | + | 287108524 | 287108573 |
| Sma-1-13836 | NS_000200.1    | + | 287109733 | 287109782 |
| Sma-1-13837 | NS_000200.1    | + | 287160586 | 287160635 |
| Sma-1-13838 | NS_000200.1    | + | 306008896 | 306008945 |
| Sma-1-13839 | NS_000200.1    | + | 340299393 | 340299442 |
| Sma-1-13840 | NS_000200.1    | - | 343333336 | 343333287 |
| Sma-1-13841 | NS_000200.1    | - | 102262507 | 102262458 |
| Sma-1-13842 | NW_003038020.1 | + | 293266    | 293315    |
| Sma-1-13843 | NS_000200.1    | + | 234260610 | 234260659 |
| Sma-1-13844 | NW_003038034.1 | - | 902646    | 902597    |
| Sma-1-13845 | NS_000200.1    | - | 247844402 | 247844353 |
| Sma-1-13846 | NW_003038080.1 | - | 215249    | 215200    |
| Sma-1-13847 | NS_000200.1    | - | 268667859 | 268667810 |
| Sma-1-13848 | NW_003023398.1 | + | 3361      | 3410      |
| Sma-1-13849 | NW_003028168.1 | - | 202       | 153       |
| Sma-1-13850 | NW_003037800.1 | + | 1351811   | 1351860   |
| Sma-1-13851 | NW_003037809.1 | - | 655757    | 655708    |
| Sma-1-13852 | NW_003037825.1 | - | 886946    | 886897    |
| Sma-1-13853 | NW_003037836.1 | - | 386405    | 386356    |
| Sma-1-13854 | NW_003037836.1 | - | 384903    | 384854    |
| Sma-1-13855 | NW_003037888.1 | + | 36863     | 36912     |
| Sma-1-13856 | NW_003038016.1 | + | 354940    | 354989    |
| Sma-1-13857 | NW_003038018.1 | - | 697845    | 697796    |
| Sma-1-13858 | NW_003038021.1 | + | 722686    | 722735    |
| Sma-1-13859 | NW_003038023.1 | - | 493303    | 493254    |
| Sma-1-13860 | NW_003039127.1 | - | 1966529   | 1966480   |
| Sma-1-13861 | NW_003038063.1 | + | 157350    | 157399    |
| Sma-1-13862 | NS_000200.1    | + | 19981171  | 19981220  |
| Sma-1-13863 | NS_000200.1    | + | 132245355 | 132245404 |
| Sma-1-13864 | NS_000200.1    | + | 231471477 | 231471526 |
| Sma-1-13865 | NS_000200.1    | + | 235551261 | 235551310 |
| Sma-1-13866 | NS_000200.1    | + | 261653628 | 261653677 |
| Sma-1-13867 | NS_000200.1    | + | 373274767 | 373274816 |
| Sma-1-13868 | NS_000200.1    | - | 374198178 | 374198129 |
| Sma-1-13869 | NS_000200.1    | - | 237653594 | 237653545 |
| Sma-1-13870 | NS_000200.1    | - | 233098695 | 233098646 |
| Sma-1-13871 | NS_000200.1    | - | 115044028 | 115043979 |
| Sma-1-13872 | NS_000200.1    | - | 75943504  | 75943455  |
| Sma-1-13873 | NS_000200.1    | - | 75942002  | 75941953  |
| Sma-1-13874 | NS_000200.1    | - | 60016728  | 60016679  |
| Sma-1-13875 | NS_000200.1    | - | 34320221  | 34320172  |
| Sma-1-13876 | NW_003037832.1 | + | 686107    | 686156    |
| Sma-1-13877 | NS_000200.1    | + | 71895538  | 71895587  |
| Sma-1-13878 | NW_003037806.1 | + | 1477013   | 1477062   |
| Sma-1-13879 | NS_000200.1    | + | 29672227  | 29672276  |
| Sma-1-13880 | NW_003037912.1 | - | 46732     | 46683     |
| Sma-1-13881 | NS_000200.1    | - | 156858307 | 156858258 |
| Sma-1-13882 | NW_003037839.1 | - | 554312    | 554263    |
| Sma-1-13883 | NS_000200.1    | - | 79512462  | 79512413  |
| Sma-1-13884 | NW_003026596.1 | - | 126007    | 125958    |

|             |                |   |           |           |
|-------------|----------------|---|-----------|-----------|
| Sma-1-13885 | NS_000200.1    | - | 305396635 | 305396586 |
| Sma-1-13886 | NW_003035648.1 | - | 885       | 836       |
| Sma-1-13887 | NS_000200.1    | - | 330443222 | 330443173 |
| Sma-1-13888 | NW_003034684.1 | - | 1350      | 1301      |
| Sma-1-13889 | NW_003037889.1 | - | 1071854   | 1071805   |
| Sma-1-13890 | NS_000200.1    | - | 328162177 | 328162128 |
| Sma-1-13891 | NS_000200.1    | - | 134848344 | 134848295 |
| Sma-1-13892 | NW_003037798.1 | - | 1251286   | 1251237   |
| Sma-1-13893 | NS_000200.1    | - | 15510444  | 15510395  |
| Sma-1-13894 | NW_003038142.1 | - | 394435    | 394386    |
| Sma-1-13895 | NS_000200.1    | - | 287604871 | 287604822 |
| Sma-1-13896 | NW_003037798.1 | + | 1666957   | 1667006   |
| Sma-1-13897 | NS_000200.1    | + | 15926115  | 15926164  |
| Sma-1-13898 | NW_003037982.1 | - | 825616    | 825567    |
| Sma-1-13899 | NS_000200.1    | - | 214484811 | 214484762 |
| Sma-1-13900 | NW_003026481.1 | - | 171390    | 171341    |
| Sma-1-13901 | NS_000200.1    | - | 255571374 | 255571325 |
| Sma-1-13902 | NW_003026517.1 | + | 311335    | 311384    |
| Sma-1-13903 | NS_000200.1    | + | 299917344 | 299917393 |
| Sma-1-13904 | NW_003037863.1 | - | 409642    | 409593    |
| Sma-1-13905 | NW_003038505.1 | + | 26264     | 26313     |
| Sma-1-13906 | NS_000200.1    | + | 336105601 | 336105650 |
| Sma-1-13907 | NS_000200.1    | - | 107168009 | 107167960 |
| Sma-1-13908 | NW_003038038.1 | + | 82894     | 82943     |
| Sma-1-13909 | NS_000200.1    | + | 251986287 | 251986336 |
| Sma-1-13910 | NW_003038151.1 | + | 183761    | 183810    |
| Sma-1-13911 | NW_003038156.1 | + | 253490    | 253539    |
| Sma-1-13912 | NS_000200.1    | + | 292091004 | 292091053 |
| Sma-1-13913 | NS_000200.1    | + | 294985603 | 294985652 |
| Sma-1-13914 | NW_003038147.1 | - | 397550    | 397501    |
| Sma-1-13915 | NS_000200.1    | - | 289925293 | 289925244 |
| Sma-1-13916 | NW_003038148.1 | + | 201581    | 201630    |
| Sma-1-13917 | NS_000200.1    | + | 290275565 | 290275614 |
| Sma-1-13918 | NW_003038025.1 | - | 543958    | 543909    |
| Sma-1-13919 | NS_000200.1    | - | 239402203 | 239402154 |
| Sma-1-13920 | NW_003026608.1 | + | 60160     | 60209     |
| Sma-1-13921 | NS_000200.1    | + | 309338280 | 309338329 |
| Sma-1-13922 | NW_003026481.1 | + | 2525      | 2574      |
| Sma-1-13923 | NS_000200.1    | + | 255402509 | 255402558 |
| Sma-1-13924 | NW_003037790.1 | - | 216356    | 216307    |
| Sma-1-13925 | NW_003037797.1 | + | 2956679   | 2956728   |
| Sma-1-13926 | NW_003037798.1 | - | 1790179   | 1790130   |
| Sma-1-13927 | NW_003037805.1 | - | 310917    | 310868    |
| Sma-1-13928 | NW_003037809.1 | + | 217403    | 217452    |
| Sma-1-13929 | NW_003037827.1 | + | 2196398   | 2196447   |
| Sma-1-13930 | NW_003037834.1 | + | 1073938   | 1073987   |
| Sma-1-13931 | NW_003037908.1 | - | 791249    | 791200    |
| Sma-1-13932 | NW_003037914.1 | + | 1225267   | 1225316   |
| Sma-1-13933 | NW_003038010.1 | - | 397805    | 397756    |
| Sma-1-13934 | NW_003038011.1 | + | 227072    | 227121    |
| Sma-1-13935 | NW_003038028.1 | - | 55156     | 55107     |
| Sma-1-13936 | NW_003038037.1 | + | 672091    | 672140    |

|             |                |   |           |           |
|-------------|----------------|---|-----------|-----------|
| Sma-1-13937 | NW_003038038.1 | - | 594818    | 594769    |
| Sma-1-13938 | NW_003039127.1 | + | 1622744   | 1622793   |
| Sma-1-13939 | NW_003026576.1 | + | 11734     | 11783     |
| Sma-1-13940 | NS_000200.1    | + | 13384539  | 13384588  |
| Sma-1-13941 | NS_000200.1    | + | 33881867  | 33881916  |
| Sma-1-13942 | NS_000200.1    | + | 64818539  | 64818588  |
| Sma-1-13943 | NS_000200.1    | + | 74234424  | 74234473  |
| Sma-1-13944 | NS_000200.1    | + | 114700243 | 114700292 |
| Sma-1-13945 | NS_000200.1    | + | 161369517 | 161369566 |
| Sma-1-13946 | NS_000200.1    | + | 227754722 | 227754771 |
| Sma-1-13947 | NS_000200.1    | + | 250827500 | 250827549 |
| Sma-1-13948 | NS_000200.1    | + | 302639310 | 302639359 |
| Sma-1-13949 | NS_000200.1    | - | 381560528 | 381560479 |
| Sma-1-13950 | NS_000200.1    | - | 252498211 | 252498162 |
| Sma-1-13951 | NS_000200.1    | - | 241362730 | 241362681 |
| Sma-1-13952 | NS_000200.1    | - | 227216028 | 227215979 |
| Sma-1-13953 | NS_000200.1    | - | 153264380 | 153264331 |
| Sma-1-13954 | NS_000200.1    | - | 26868761  | 26868712  |
| Sma-1-13955 | NS_000200.1    | - | 16049337  | 16049288  |
| Sma-1-13956 | NW_003037836.1 | - | 233304    | 233255    |
| Sma-1-13957 | NS_000200.1    | - | 75790403  | 75790354  |
| Sma-1-13958 | NW_003037810.1 | + | 276877    | 276926    |
| Sma-1-13959 | NS_000200.1    | + | 36881399  | 36881448  |
| Sma-1-13960 | NW_003037909.1 | - | 131386    | 131337    |
| Sma-1-13961 | NS_000200.1    | - | 153673035 | 153672986 |
| Sma-1-13962 | NW_003038029.1 | - | 198615    | 198566    |
| Sma-1-13963 | NS_000200.1    | - | 242399516 | 242399467 |
| Sma-1-13964 | NW_003038240.1 | - | 241570    | 241521    |
| Sma-1-13965 | NS_000200.1    | - | 314380501 | 314380452 |
| Sma-1-13966 | NW_003039127.1 | + | 2307511   | 2307560   |
| Sma-1-13967 | NS_000200.1    | + | 115385010 | 115385059 |
| Sma-1-13968 | NW_003037824.1 | + | 22617     | 22666     |
| Sma-1-13969 | NS_000200.1    | + | 56953557  | 56953606  |
| Sma-1-13970 | NW_003037840.1 | - | 1567480   | 1567431   |
| Sma-1-13971 | NS_000200.1    | - | 82190804  | 82190755  |
| Sma-1-13972 | NW_003037831.1 | - | 1108765   | 1108716   |
| Sma-1-13973 | NS_000200.1    | - | 70558067  | 70558018  |
| Sma-1-13974 | NW_003037935.1 | - | 739557    | 739508    |
| Sma-1-13975 | NS_000200.1    | - | 180156092 | 180156043 |
| Sma-1-13976 | NW_003038077.1 | - | 250421    | 250372    |
| Sma-1-13977 | NS_000200.1    | - | 267022061 | 267022012 |
| Sma-1-13978 | NW_003037812.1 | + | 987506    | 987555    |
| Sma-1-13979 | NS_000200.1    | + | 40470245  | 40470294  |
| Sma-1-13980 | NW_003038123.1 | + | 218375    | 218424    |
| Sma-1-13981 | NW_003038135.1 | - | 84687     | 84638     |
| Sma-1-13982 | NW_003038143.1 | - | 416420    | 416371    |
| Sma-1-13983 | NS_000200.1    | + | 278966542 | 278966591 |
| Sma-1-13984 | NS_000200.1    | - | 288175912 | 288175863 |
| Sma-1-13985 | NS_000200.1    | - | 283957026 | 283956977 |
| Sma-1-13986 | NW_003026608.1 | - | 96111     | 96062     |
| Sma-1-13987 | NW_003038487.1 | + | 45375     | 45424     |
| Sma-1-13988 | NW_003026470.1 | + | 97192     | 97241     |

|             |                |   |           |           |
|-------------|----------------|---|-----------|-----------|
| Sma-1-13989 | NW_003026609.1 | + | 90906     | 90955     |
| Sma-1-13990 | NW_003037814.1 | + | 265921    | 265970    |
| Sma-1-13991 | NW_003037830.1 | - | 1242603   | 1242554   |
| Sma-1-13992 | NW_003037847.1 | - | 270014    | 269965    |
| Sma-1-13993 | NW_003037854.1 | - | 1627504   | 1627455   |
| Sma-1-13994 | NW_003037923.1 | + | 202217    | 202266    |
| Sma-1-13995 | NW_003037935.1 | + | 648984    | 649033    |
| Sma-1-13996 | NW_003038033.1 | - | 928210    | 928161    |
| Sma-1-13997 | NW_003038454.1 | - | 68344     | 68295     |
| Sma-1-13998 | NW_003026483.1 | + | 75781     | 75830     |
| Sma-1-13999 | NS_000200.1    | + | 43249781  | 43249830  |
| Sma-1-14000 | NS_000200.1    | + | 171258430 | 171258479 |
| Sma-1-14001 | NS_000200.1    | + | 180065519 | 180065568 |
| Sma-1-14002 | NS_000200.1    | + | 219221161 | 219221210 |
| Sma-1-14003 | NS_000200.1    | + | 256590305 | 256590354 |
| Sma-1-14004 | NS_000200.1    | + | 309745898 | 309745947 |
| Sma-1-14005 | NS_000200.1    | + | 333501162 | 333501211 |
| Sma-1-14006 | NS_000200.1    | - | 330780694 | 330780645 |
| Sma-1-14007 | NS_000200.1    | - | 309374231 | 309374182 |
| Sma-1-14008 | NS_000200.1    | - | 246908212 | 246908163 |
| Sma-1-14009 | NS_000200.1    | - | 98531925  | 98531876  |
| Sma-1-14010 | NS_000200.1    | - | 88921744  | 88921695  |
| Sma-1-14011 | NS_000200.1    | - | 69132974  | 69132925  |
| Sma-1-14012 | NW_003022199.1 | + | 795       | 844       |
| Sma-1-14013 | NS_000200.1    | + | 360916729 | 360916778 |
| Sma-1-14014 | NW_003037851.1 | - | 581809    | 581760    |
| Sma-1-14015 | NS_000200.1    | - | 93985119  | 93985070  |
| Sma-1-14016 | NW_003037966.1 | - | 478930    | 478881    |
| Sma-1-14017 | NS_000200.1    | - | 199180793 | 199180744 |
| Sma-1-14018 | NW_003037846.1 | + | 273515    | 273564    |
| Sma-1-14019 | NW_003038028.1 | - | 819038    | 818989    |
| Sma-1-14020 | NS_000200.1    | + | 87908085  | 87908134  |
| Sma-1-14021 | NS_000200.1    | - | 242126612 | 242126563 |
| Sma-1-14022 | NW_003037892.1 | + | 345899    | 345948    |
| Sma-1-14023 | NS_000200.1    | + | 141069126 | 141069175 |
| Sma-1-14024 | NW_003037846.1 | + | 649005    | 649054    |
| Sma-1-14025 | NS_000200.1    | + | 88283575  | 88283624  |
| Sma-1-14026 | NW_003037894.1 | - | 292854    | 292805    |
| Sma-1-14027 | NS_000200.1    | - | 142189427 | 142189378 |
| Sma-1-14028 | NW_003037904.1 | - | 253065    | 253016    |
| Sma-1-14029 | NS_000200.1    | - | 148967564 | 148967515 |
| Sma-1-14030 | NW_003037827.1 | + | 1091365   | 1091414   |
| Sma-1-14031 | NS_000200.1    | + | 63713506  | 63713555  |
| Sma-1-14032 | NW_003037909.1 | + | 425014    | 425063    |
| Sma-1-14033 | NS_000200.1    | + | 153966663 | 153966712 |
| Sma-1-14034 | NW_003037934.1 | - | 189134    | 189085    |
| Sma-1-14035 | NS_000200.1    | - | 179235881 | 179235832 |
| Sma-1-14036 | NW_003037888.1 | - | 656570    | 656521    |
| Sma-1-14037 | NS_000200.1    | - | 132865062 | 132865013 |
| Sma-1-14038 | NW_003037820.1 | - | 490418    | 490369    |
| Sma-1-14039 | NW_003037820.1 | - | 486763    | 486714    |
| Sma-1-14040 | NS_000200.1    | - | 52763400  | 52763351  |

|             |                |   |           |           |
|-------------|----------------|---|-----------|-----------|
| Sma-1-14041 | NS_000200.1    | - | 52759745  | 52759696  |
| Sma-1-14042 | NW_003037819.1 | + | 1123393   | 1123442   |
| Sma-1-14043 | NS_000200.1    | + | 52211658  | 52211707  |
| Sma-1-14044 | NW_003037918.1 | - | 440396    | 440347    |
| Sma-1-14045 | NS_000200.1    | - | 167007386 | 167007337 |
| Sma-1-14046 | NW_003037932.1 | + | 249773    | 249822    |
| Sma-1-14047 | NS_000200.1    | + | 177782969 | 177783018 |
| Sma-1-14048 | NW_003037936.1 | - | 229980    | 229931    |
| Sma-1-14049 | NW_003037850.1 | - | 93057     | 93008     |
| Sma-1-14050 | NS_000200.1    | - | 180669709 | 180669660 |
| Sma-1-14051 | NS_000200.1    | - | 92079087  | 92079038  |
| Sma-1-14052 | NW_003037589.1 | - | 14773     | 14724     |
| Sma-1-14053 | NS_000200.1    | - | 372663725 | 372663676 |
| Sma-1-14054 | NW_003028779.1 | - | 1375      | 1326      |
| Sma-1-14055 | NS_000200.1    | - | 369922714 | 369922665 |
| Sma-1-14056 | NW_003026471.1 | - | 214881    | 214832    |
| Sma-1-14057 | NW_003037807.1 | + | 140162    | 140211    |
| Sma-1-14058 | NW_003037807.1 | - | 141383    | 141334    |
| Sma-1-14059 | NS_000200.1    | + | 30401678  | 30401727  |
| Sma-1-14060 | NS_000200.1    | - | 222327114 | 222327065 |
| Sma-1-14061 | NS_000200.1    | - | 30402899  | 30402850  |
| Sma-1-14062 | NW_003038067.1 | - | 108558    | 108509    |
| Sma-1-14063 | NS_000200.1    | - | 262962611 | 262962562 |
| Sma-1-14064 | NW_003037894.1 | - | 508706    | 508657    |
| Sma-1-14065 | NS_000200.1    | - | 142405279 | 142405230 |
| Sma-1-14066 | NW_003038507.1 | + | 98799     | 98848     |
| Sma-1-14067 | NS_000200.1    | + | 336767693 | 336767742 |
| Sma-1-14068 | NW_003037810.1 | - | 400247    | 400198    |
| Sma-1-14069 | NW_003038135.1 | + | 191361    | 191410    |
| Sma-1-14070 | NS_000200.1    | + | 284063700 | 284063749 |
| Sma-1-14071 | NS_000200.1    | - | 37004769  | 37004720  |
| Sma-1-14072 | NW_003038146.1 | + | 337242    | 337291    |
| Sma-1-14073 | NS_000200.1    | + | 289317912 | 289317961 |
| Sma-1-14074 | NW_003035580.1 | + | 7380      | 7429      |
| Sma-1-14075 | NS_000200.1    | + | 329088974 | 329089023 |
| Sma-1-14076 | NW_003038037.1 | + | 777305    | 777354    |
| Sma-1-14077 | NS_000200.1    | + | 250932714 | 250932763 |
| Sma-1-14078 | NW_003026617.1 | + | 242981    | 243030    |
| Sma-1-14079 | NW_003037818.1 | + | 206344    | 206393    |
| Sma-1-14080 | NW_003037862.1 | - | 265524    | 265475    |
| Sma-1-14081 | NW_003037918.1 | - | 253979    | 253930    |
| Sma-1-14082 | NW_003037987.1 | - | 34389     | 34340     |
| Sma-1-14083 | NW_003038018.1 | + | 76876     | 76925     |
| Sma-1-14084 | NW_003038037.1 | - | 1618528   | 1618479   |
| Sma-1-14085 | NW_003038254.1 | + | 193984    | 194033    |
| Sma-1-14086 | NS_000200.1    | + | 48921751  | 48921800  |
| Sma-1-14087 | NS_000200.1    | + | 232477726 | 232477775 |
| Sma-1-14088 | NS_000200.1    | + | 319813840 | 319813889 |
| Sma-1-14089 | NS_000200.1    | + | 320229542 | 320229591 |
| Sma-1-14090 | NS_000200.1    | - | 251773937 | 251773888 |
| Sma-1-14091 | NS_000200.1    | - | 215787010 | 215786961 |
| Sma-1-14092 | NS_000200.1    | - | 166820969 | 166820920 |

|             |                |   |           |           |
|-------------|----------------|---|-----------|-----------|
| Sma-1-14093 | NS.000200.1    | - | 105917185 | 105917136 |
| Sma-1-14094 | NW_003032503.1 | - | 238       | 189       |
| Sma-1-14095 | NW_003026608.1 | - | 18196     | 18147     |
| Sma-1-14096 | NW_003037793.1 | + | 3238922   | 3238971   |
| Sma-1-14097 | NW_003037914.1 | - | 1645200   | 1645151   |
| Sma-1-14098 | NS.000200.1    | + | 3238922   | 3238971   |
| Sma-1-14099 | NS.000200.1    | - | 346196952 | 346196903 |
| Sma-1-14100 | NS.000200.1    | - | 309296316 | 309296267 |
| Sma-1-14101 | NS.000200.1    | - | 161789450 | 161789401 |
| Sma-1-14102 | NW_003037938.1 | + | 4378      | 4427      |
| Sma-1-14103 | NW_003038035.1 | - | 908420    | 908371    |
| Sma-1-14104 | NS.000200.1    | + | 182041491 | 182041540 |
| Sma-1-14105 | NS.000200.1    | - | 248769912 | 248769863 |
| Sma-1-14106 | NW_003026456.1 | + | 311783    | 311832    |
| Sma-1-14107 | NS.000200.1    | + | 58234919  | 58234968  |
| Sma-1-14108 | NW_003038024.1 | + | 701376    | 701425    |
| Sma-1-14109 | NS.000200.1    | + | 238598405 | 238598454 |
| Sma-1-14110 | NW_003038037.1 | - | 528498    | 528449    |
| Sma-1-14111 | NS.000200.1    | - | 250683907 | 250683858 |
| Sma-1-14112 | NW_003021469.1 | - | 245       | 196       |
| Sma-1-14113 | NW_003038070.1 | + | 75857     | 75906     |
| Sma-1-14114 | NW_003037809.1 | - | 585508    | 585459    |
| Sma-1-14115 | NW_003037923.1 | - | 393722    | 393673    |
| Sma-1-14116 | NW_003038067.1 | - | 94970     | 94921     |
| Sma-1-14117 | NS.000200.1    | + | 264413098 | 264413147 |
| Sma-1-14118 | NS.000200.1    | - | 344131267 | 344131218 |
| Sma-1-14119 | NS.000200.1    | - | 262949023 | 262948974 |
| Sma-1-14120 | NS.000200.1    | - | 171449935 | 171449886 |
| Sma-1-14121 | NS.000200.1    | - | 34249972  | 34249923  |
| Sma-1-14122 | NW_003037818.1 | + | 2019735   | 2019784   |
| Sma-1-14123 | NS.000200.1    | + | 50735142  | 50735191  |
| Sma-1-14124 | NW_003038037.1 | - | 1211748   | 1211699   |
| Sma-1-14125 | NS.000200.1    | - | 251367157 | 251367108 |
| Sma-1-14126 | NW_003037844.1 | - | 27053     | 27004     |
| Sma-1-14127 | NS.000200.1    | - | 86210499  | 86210450  |
| Sma-1-14128 | NW_003037793.1 | + | 153640    | 153689    |
| Sma-1-14129 | NS.000200.1    | + | 153640    | 153689    |
| Sma-1-14130 | NW_003037796.1 | - | 243166    | 243117    |
| Sma-1-14131 | NS.000200.1    | - | 8452810   | 8452761   |
| Sma-1-14132 | NW_003037792.1 | - | 265664    | 265615    |
| Sma-1-14133 | NS.000200.1    | - | 382703008 | 382702959 |
| Sma-1-14134 | NW_003037812.1 | + | 1082029   | 1082078   |
| Sma-1-14135 | NS.000200.1    | + | 40564768  | 40564817  |
| Sma-1-14136 | NW_003037911.1 | - | 20086     | 20037     |
| Sma-1-14137 | NW_003038240.1 | + | 92467     | 92516     |
| Sma-1-14138 | NW_003038086.1 | - | 610608    | 610559    |
| Sma-1-14139 | NS.000200.1    | + | 314231398 | 314231447 |
| Sma-1-14140 | NS.000200.1    | - | 272859201 | 272859152 |
| Sma-1-14141 | NS.000200.1    | - | 155807439 | 155807390 |
| Sma-1-14142 | NW_003037911.1 | - | 334468    | 334419    |
| Sma-1-14143 | NS.000200.1    | - | 156121821 | 156121772 |
| Sma-1-14144 | NW_003037817.1 | + | 987740    | 987789    |

|             |                |   |           |           |
|-------------|----------------|---|-----------|-----------|
| Sma-1-14145 | NS_000200.1    | + | 48370092  | 48370141  |
| Sma-1-14146 | NW_003037918.1 | + | 184571    | 184620    |
| Sma-1-14147 | NS_000200.1    | + | 166751561 | 166751610 |
| Sma-1-14148 | NW_003038010.1 | + | 517711    | 517760    |
| Sma-1-14149 | NS_000200.1    | + | 227335934 | 227335983 |
| Sma-1-14150 | NW_003035879.1 | + | 186726    | 186775    |
| Sma-1-14151 | NW_003039026.1 | - | 3537      | 3488      |
| Sma-1-14152 | NW_003035639.1 | - | 39876     | 39827     |
| Sma-1-14153 | NW_003035661.1 | - | 35158     | 35109     |
| Sma-1-14154 | NW_003037809.1 | - | 2430954   | 2430905   |
| Sma-1-14155 | NW_003037812.1 | - | 1121364   | 1121315   |
| Sma-1-14156 | NW_003037827.1 | - | 1610691   | 1610642   |
| Sma-1-14157 | NW_003037827.1 | - | 1604393   | 1604344   |
| Sma-1-14158 | NW_003037851.1 | + | 278701    | 278750    |
| Sma-1-14159 | NW_003037865.1 | - | 78035     | 77986     |
| Sma-1-14160 | NW_003037877.1 | - | 403597    | 403548    |
| Sma-1-14161 | NW_003037888.1 | - | 229921    | 229872    |
| Sma-1-14162 | NW_003037928.1 | + | 183851    | 183900    |
| Sma-1-14163 | NW_003037928.1 | + | 549429    | 549478    |
| Sma-1-14164 | NW_003037942.1 | + | 662527    | 662576    |
| Sma-1-14165 | NW_003038030.1 | + | 234172    | 234221    |
| Sma-1-14166 | NW_003038037.1 | + | 1136384   | 1136433   |
| Sma-1-14167 | NW_003038071.1 | - | 202021    | 201972    |
| Sma-1-14168 | NW_003038506.1 | - | 184074    | 184025    |
| Sma-1-14169 | NW_003026488.1 | - | 70740     | 70691     |
| Sma-1-14170 | NW_003038074.1 | + | 124828    | 124877    |
| Sma-1-14171 | NW_003038086.1 | - | 351798    | 351749    |
| Sma-1-14172 | NW_003038156.1 | - | 475619    | 475570    |
| Sma-1-14173 | NS_000200.1    | + | 93682011  | 93682060  |
| Sma-1-14174 | NS_000200.1    | + | 174507804 | 174507853 |
| Sma-1-14175 | NS_000200.1    | + | 174873382 | 174873431 |
| Sma-1-14176 | NS_000200.1    | + | 186422435 | 186422484 |
| Sma-1-14177 | NS_000200.1    | + | 243370039 | 243370088 |
| Sma-1-14178 | NS_000200.1    | + | 251291793 | 251291842 |
| Sma-1-14179 | NS_000200.1    | + | 266016208 | 266016257 |
| Sma-1-14180 | NS_000200.1    | + | 338154053 | 338154102 |
| Sma-1-14181 | NS_000200.1    | - | 358752482 | 358752433 |
| Sma-1-14182 | NS_000200.1    | - | 336545913 | 336545864 |
| Sma-1-14183 | NS_000200.1    | - | 330985844 | 330985795 |
| Sma-1-14184 | NS_000200.1    | - | 329990316 | 329990267 |
| Sma-1-14185 | NS_000200.1    | - | 295207732 | 295207683 |
| Sma-1-14186 | NS_000200.1    | - | 272600391 | 272600342 |
| Sma-1-14187 | NS_000200.1    | - | 265005064 | 265005015 |
| Sma-1-14188 | NS_000200.1    | - | 263577234 | 263577185 |
| Sma-1-14189 | NS_000200.1    | - | 132438413 | 132438364 |
| Sma-1-14190 | NS_000200.1    | - | 121442159 | 121442110 |
| Sma-1-14191 | NS_000200.1    | - | 110499954 | 110499905 |
| Sma-1-14192 | NS_000200.1    | - | 64232832  | 64232783  |
| Sma-1-14193 | NS_000200.1    | - | 64226534  | 64226485  |
| Sma-1-14194 | NS_000200.1    | - | 40604103  | 40604054  |
| Sma-1-14195 | NS_000200.1    | - | 36095418  | 36095369  |
| Sma-1-14196 | NW_003037915.1 | - | 1056094   | 1056045   |

|             |                |   |           |           |
|-------------|----------------|---|-----------|-----------|
| Sma-1-14197 | NS.000200.1    | - | 162956080 | 162956031 |
| Sma-1-14198 | NW_003037928.1 | + | 337917    | 337966    |
| Sma-1-14199 | NS.000200.1    | + | 174661870 | 174661919 |
| Sma-1-14200 | NW_003037849.1 | - | 965341    | 965292    |
| Sma-1-14201 | NS.000200.1    | - | 91941614  | 91941565  |
| Sma-1-14202 | NW_003037804.1 | - | 653838    | 653789    |
| Sma-1-14203 | NW_003037900.1 | - | 638614    | 638565    |
| Sma-1-14204 | NS.000200.1    | - | 145767480 | 145767431 |
| Sma-1-14205 | NS.000200.1    | - | 25793858  | 25793809  |
| Sma-1-14206 | NW_003038396.1 | - | 4125      | 4076      |
| Sma-1-14207 | NW_003037839.1 | + | 1273342   | 1273391   |
| Sma-1-14208 | NS.000200.1    | + | 80231492  | 80231541  |
| Sma-1-14209 | NS.000200.1    | - | 328073555 | 328073506 |
| Sma-1-14210 | NW_003038050.1 | + | 219187    | 219236    |
| Sma-1-14211 | NS.000200.1    | + | 256494081 | 256494130 |
| Sma-1-14212 | NW_003037977.1 | - | 187586    | 187537    |
| Sma-1-14213 | NS.000200.1    | - | 208473606 | 208473557 |
| Sma-1-14214 | NW_003026512.1 | - | 247167    | 247118    |
| Sma-1-14215 | NS.000200.1    | - | 285341207 | 285341158 |
| Sma-1-14216 | NW_003038259.1 | + | 55591     | 55640     |
| Sma-1-14217 | NS.000200.1    | + | 322916190 | 322916239 |
| Sma-1-14218 | NW_003038084.1 | + | 288533    | 288582    |
| Sma-1-14219 | NS.000200.1    | + | 271303777 | 271303826 |
| Sma-1-14220 | NW_003037975.1 | - | 37132     | 37083     |
| Sma-1-14221 | NS.000200.1    | - | 205619356 | 205619307 |
| Sma-1-14222 | NW_003037810.1 | - | 1270174   | 1270125   |
| Sma-1-14223 | NS.000200.1    | - | 37874696  | 37874647  |
| Sma-1-14224 | NW_003037918.1 | - | 221674    | 221625    |
| Sma-1-14225 | NS.000200.1    | - | 166788664 | 166788615 |
| Sma-1-14226 | NW_003037928.1 | - | 599225    | 599176    |
| Sma-1-14227 | NS.000200.1    | - | 174923178 | 174923129 |
| Sma-1-14228 | NW_003037795.1 | - | 387377    | 387328    |
| Sma-1-14229 | NS.000200.1    | - | 6778260   | 6778211   |
| Sma-1-14230 | NW_003037377.1 | + | 2         | 51        |
| Sma-1-14231 | NS.000200.1    | + | 367309654 | 367309703 |
| Sma-1-14232 | NW_003038005.1 | - | 150923    | 150874    |
| Sma-1-14233 | NW_003037822.1 | + | 1227083   | 1227132   |
| Sma-1-14234 | NS.000200.1    | + | 55535089  | 55535138  |
| Sma-1-14235 | NS.000200.1    | - | 224556877 | 224556828 |
| Sma-1-14236 | NW_003020783.1 | - | 1634      | 1585      |
| Sma-1-14237 | NS.000200.1    | - | 364450146 | 364450097 |
| Sma-1-14238 | NW_003037809.1 | - | 1799596   | 1799547   |
| Sma-1-14239 | NS.000200.1    | - | 35464060  | 35464011  |
| Sma-1-14240 | NW_003037928.1 | - | 605906    | 605857    |
| Sma-1-14241 | NS.000200.1    | - | 174929859 | 174929810 |
| Sma-1-14242 | NW_003038011.1 | + | 395874    | 395923    |
| Sma-1-14243 | NS.000200.1    | + | 227923524 | 227923573 |
| Sma-1-14244 | NW_003038113.1 | + | 35373     | 35422     |
| Sma-1-14245 | NS.000200.1    | + | 276696235 | 276696284 |
| Sma-1-14246 | NW_003037795.1 | + | 834289    | 834338    |
| Sma-1-14247 | NS.000200.1    | + | 7225172   | 7225221   |
| Sma-1-14248 | NW_003037944.1 | - | 707387    | 707338    |



|             |                |   |           |           |
|-------------|----------------|---|-----------|-----------|
| Sma-1-14249 | NS_000200.1    | - | 188928740 | 188928691 |
| Sma-1-14250 | NW_003029798.1 | - | 2468      | 2419      |
| Sma-1-14251 | NS_000200.1    | - | 375636214 | 375636165 |
| Sma-1-14252 | NW_003037820.1 | + | 64400     | 64449     |
| Sma-1-14253 | NW_003037825.1 | - | 1395868   | 1395819   |
| Sma-1-14254 | NW_003037923.1 | - | 119163    | 119114    |
| Sma-1-14255 | NS_000200.1    | + | 52337382  | 52337431  |
| Sma-1-14256 | NS_000200.1    | - | 171175376 | 171175327 |
| Sma-1-14257 | NS_000200.1    | - | 60525650  | 60525601  |
| Sma-1-14258 | NW_003037967.1 | - | 447378    | 447329    |
| Sma-1-14259 | NS_000200.1    | - | 199687349 | 199687300 |
| Sma-1-14260 | NW_003037875.1 | - | 487237    | 487188    |
| Sma-1-14261 | NW_003037797.1 | - | 778083    | 778034    |
| Sma-1-14262 | NW_003037804.1 | + | 237296    | 237345    |
| Sma-1-14263 | NW_003037886.1 | + | 150702    | 150751    |
| Sma-1-14264 | NS_000200.1    | + | 25377316  | 25377365  |
| Sma-1-14265 | NS_000200.1    | + | 129406269 | 129406318 |
| Sma-1-14266 | NS_000200.1    | - | 120515906 | 120515857 |
| Sma-1-14267 | NS_000200.1    | - | 11205943  | 11205894  |
| Sma-1-14268 | NW_003027937.1 | - | 1303      | 1254      |
| Sma-1-14269 | NW_003037790.1 | - | 225047    | 224998    |
| Sma-1-14270 | NS_000200.1    | - | 381569219 | 381569170 |
| Sma-1-14271 | NS_000200.1    | - | 369030159 | 369030110 |
| Sma-1-14272 | NW_003026619.1 | + | 16786     | 16835     |
| Sma-1-14273 | NS_000200.1    | + | 322207530 | 322207579 |
| Sma-1-14274 | NW_003037976.1 | - | 64926     | 64877     |
| Sma-1-14275 | NS_000200.1    | - | 206679241 | 206679192 |
| Sma-1-14276 | NW_003024200.1 | - | 799       | 750       |
| Sma-1-14277 | NW_003037873.1 | - | 58187     | 58138     |
| Sma-1-14278 | NW_003037798.1 | - | 1926752   | 1926703   |
| Sma-1-14279 | NS_000200.1    | - | 348549703 | 348549654 |
| Sma-1-14280 | NS_000200.1    | - | 118797315 | 118797266 |
| Sma-1-14281 | NS_000200.1    | - | 16185910  | 16185861  |
| Sma-1-14282 | NW_003026477.1 | - | 37151     | 37102     |
| Sma-1-14283 | NS_000200.1    | - | 253914560 | 253914511 |
| Sma-1-14284 | NW_003026498.1 | - | 37845     | 37796     |
| Sma-1-14285 | NS_000200.1    | - | 275025700 | 275025651 |
| Sma-1-14286 | NW_003038086.1 | + | 667472    | 667521    |
| Sma-1-14287 | NS_000200.1    | + | 272916065 | 272916114 |
| Sma-1-14288 | NW_003037833.1 | - | 903171    | 903122    |
| Sma-1-14289 | NW_003037954.1 | - | 20852     | 20803     |
| Sma-1-14290 | NW_003038086.1 | + | 666025    | 666074    |
| Sma-1-14291 | NS_000200.1    | + | 272914618 | 272914667 |
| Sma-1-14292 | NS_000200.1    | - | 193250474 | 193250425 |
| Sma-1-14293 | NS_000200.1    | - | 73094267  | 73094218  |
| Sma-1-14294 | NW_003026462.1 | - | 542072    | 542023    |
| Sma-1-14295 | NS_000200.1    | - | 197209575 | 197209526 |
| Sma-1-14296 | NW_003026460.1 | + | 17138     | 17187     |
| Sma-1-14297 | NS_000200.1    | + | 170539344 | 170539393 |
| Sma-1-14298 | NW_003037995.1 | + | 172215    | 172264    |
| Sma-1-14299 | NS_000200.1    | + | 219861983 | 219862032 |
| Sma-1-14300 | NW_003024960.1 | - | 393       | 344       |

|             |                |   |           |           |
|-------------|----------------|---|-----------|-----------|
| Sma-1-14301 | NW_003035672.1 | - | 9384      | 9335      |
| Sma-1-14302 | NW_003035880.1 | + | 34200     | 34249     |
| Sma-1-14303 | NW_003037890.1 | - | 1591647   | 1591598   |
| Sma-1-14304 | NS_000200.1    | + | 339275264 | 339275313 |
| Sma-1-14305 | NS_000200.1    | - | 355811638 | 355811589 |
| Sma-1-14306 | NS_000200.1    | - | 331679474 | 331679425 |
| Sma-1-14307 | NS_000200.1    | - | 137275008 | 137274959 |
| Sma-1-14308 | NW_003037997.1 | - | 386852    | 386803    |
| Sma-1-14309 | NS_000200.1    | - | 221198294 | 221198245 |
| Sma-1-14310 | NW_003038032.1 | - | 441123    | 441074    |
| Sma-1-14311 | NS_000200.1    | - | 245600283 | 245600234 |
| Sma-1-14312 | NW_003021735.1 | + | 99        | 148       |
| Sma-1-14313 | NW_003022562.1 | + | 1729      | 1778      |
| Sma-1-14314 | NW_003032958.1 | - | 1669      | 1620      |
| Sma-1-14315 | NW_003035821.1 | + | 1946      | 1995      |
| Sma-1-14316 | NW_003036001.1 | + | 1375      | 1424      |
| Sma-1-14317 | NW_003036329.1 | - | 87        | 38        |
| Sma-1-14318 | NW_003036788.1 | - | 1068      | 1019      |
| Sma-1-14319 | NW_003037751.1 | - | 690       | 641       |
| Sma-1-14320 | NW_003032145.1 | + | 101335    | 101384    |
| Sma-1-14321 | NW_003032145.1 | + | 101741    | 101790    |
| Sma-1-14322 | NW_003026465.1 | - | 446097    | 446048    |
| Sma-1-14323 | NW_003037723.1 | + | 4281      | 4330      |
| Sma-1-14324 | NW_003026459.1 | - | 204312    | 204263    |
| Sma-1-14325 | NW_003037793.1 | - | 386201    | 386152    |
| Sma-1-14326 | NW_003037795.1 | - | 367894    | 367845    |
| Sma-1-14327 | NW_003037797.1 | + | 614399    | 614448    |
| Sma-1-14328 | NW_003037809.1 | + | 1789140   | 1789189   |
| Sma-1-14329 | NW_003037810.1 | + | 1223281   | 1223330   |
| Sma-1-14330 | NW_003037838.1 | + | 739522    | 739571    |
| Sma-1-14331 | NW_003037846.1 | + | 887105    | 887154    |
| Sma-1-14332 | NW_003037850.1 | - | 238102    | 238053    |
| Sma-1-14333 | NW_003037858.1 | - | 457684    | 457635    |
| Sma-1-14334 | NW_003037871.1 | + | 218274    | 218323    |
| Sma-1-14335 | NW_003037909.1 | + | 337286    | 337335    |
| Sma-1-14336 | NW_003037914.1 | + | 63209     | 63258     |
| Sma-1-14337 | NW_003037916.1 | + | 41099     | 41148     |
| Sma-1-14338 | NW_003037916.1 | + | 1736966   | 1737015   |
| Sma-1-14339 | NW_003037926.1 | + | 397495    | 397544    |
| Sma-1-14340 | NW_003038020.1 | + | 419883    | 419932    |
| Sma-1-14341 | NW_003038033.1 | - | 709884    | 709835    |
| Sma-1-14342 | NW_003038037.1 | + | 711938    | 711987    |
| Sma-1-14343 | NW_003038037.1 | + | 1163364   | 1163413   |
| Sma-1-14344 | NW_003038513.1 | + | 162925    | 162974    |
| Sma-1-14345 | NW_003026474.1 | + | 40576     | 40625     |
| Sma-1-14346 | NW_003026515.1 | - | 131565    | 131516    |
| Sma-1-14347 | NW_003038136.1 | - | 260707    | 260658    |
| Sma-1-14348 | NS_000200.1    | + | 11042259  | 11042308  |
| Sma-1-14349 | NS_000200.1    | + | 35453604  | 35453653  |
| Sma-1-14350 | NS_000200.1    | + | 37827803  | 37827852  |
| Sma-1-14351 | NS_000200.1    | + | 78738085  | 78738134  |
| Sma-1-14352 | NS_000200.1    | + | 88521675  | 88521724  |

|             |                |   |           |           |
|-------------|----------------|---|-----------|-----------|
| Sma-1-14353 | NS_000200.1    | + | 117666012 | 117666061 |
| Sma-1-14354 | NS_000200.1    | + | 153878935 | 153878984 |
| Sma-1-14355 | NS_000200.1    | + | 160207459 | 160207508 |
| Sma-1-14356 | NS_000200.1    | + | 163234510 | 163234559 |
| Sma-1-14357 | NS_000200.1    | + | 164930377 | 164930426 |
| Sma-1-14358 | NS_000200.1    | + | 173565765 | 173565814 |
| Sma-1-14359 | NS_000200.1    | + | 234387227 | 234387276 |
| Sma-1-14360 | NS_000200.1    | + | 250867347 | 250867396 |
| Sma-1-14361 | NS_000200.1    | + | 251318773 | 251318822 |
| Sma-1-14362 | NS_000200.1    | + | 253239151 | 253239200 |
| Sma-1-14363 | NS_000200.1    | + | 339172102 | 339172151 |
| Sma-1-14364 | NS_000200.1    | + | 343238530 | 343238579 |
| Sma-1-14365 | NS_000200.1    | + | 351768069 | 351768118 |
| Sma-1-14366 | NS_000200.1    | + | 364166555 | 364166604 |
| Sma-1-14367 | NS_000200.1    | + | 365186685 | 365186734 |
| Sma-1-14368 | NS_000200.1    | + | 376385800 | 376385849 |
| Sma-1-14369 | NS_000200.1    | + | 378800900 | 378800949 |
| Sma-1-14370 | NS_000200.1    | + | 378801306 | 378801355 |
| Sma-1-14371 | NS_000200.1    | - | 377039135 | 377039086 |
| Sma-1-14372 | NS_000200.1    | - | 359642897 | 359642848 |
| Sma-1-14373 | NS_000200.1    | - | 347654077 | 347654028 |
| Sma-1-14374 | NS_000200.1    | - | 326079170 | 326079121 |
| Sma-1-14375 | NS_000200.1    | - | 290775976 | 290775927 |
| Sma-1-14376 | NS_000200.1    | - | 284382776 | 284382727 |
| Sma-1-14377 | NS_000200.1    | - | 246689886 | 246689837 |
| Sma-1-14378 | NS_000200.1    | - | 207838691 | 207838642 |
| Sma-1-14379 | NS_000200.1    | - | 141849585 | 141849536 |
| Sma-1-14380 | NS_000200.1    | - | 101121960 | 101121911 |
| Sma-1-14381 | NS_000200.1    | - | 92224132  | 92224083  |
| Sma-1-14382 | NS_000200.1    | - | 6758777   | 6758728   |
| Sma-1-14383 | NS_000200.1    | - | 386201    | 386152    |
| Sma-1-14384 | NW_003038084.1 | + | 355089    | 355138    |
| Sma-1-14385 | NS_000200.1    | + | 271370333 | 271370382 |
| Sma-1-14386 | NW_003023837.1 | + | 32        | 81        |
| Sma-1-14387 | NW_003037800.1 | + | 1017718   | 1017767   |
| Sma-1-14388 | NS_000200.1    | + | 19647078  | 19647127  |
| Sma-1-14389 | NS_000200.1    | + | 368888301 | 368888350 |
| Sma-1-14390 | NW_003037798.1 | + | 2278824   | 2278873   |
| Sma-1-14391 | NS_000200.1    | + | 16537982  | 16538031  |
| Sma-1-14392 | NW_003037807.1 | + | 412718    | 412767    |
| Sma-1-14393 | NS_000200.1    | + | 30674234  | 30674283  |
| Sma-1-14394 | NW_003037888.1 | - | 1501658   | 1501609   |
| Sma-1-14395 | NS_000200.1    | - | 133710150 | 133710101 |
| Sma-1-14396 | NW_003037891.1 | + | 2158220   | 2158269   |
| Sma-1-14397 | NS_000200.1    | + | 140039498 | 140039547 |
| Sma-1-14398 | NW_003037873.1 | + | 553954    | 554003    |
| Sma-1-14399 | NW_003026472.1 | + | 699301    | 699350    |
| Sma-1-14400 | NW_003037998.1 | + | 9428      | 9477      |
| Sma-1-14401 | NS_000200.1    | + | 119293082 | 119293131 |
| Sma-1-14402 | NS_000200.1    | + | 221296024 | 221296073 |
| Sma-1-14403 | NS_000200.1    | + | 237111293 | 237111342 |
| Sma-1-14404 | NW_003037841.1 | + | 191345    | 191394    |

|             |                |   |           |           |
|-------------|----------------|---|-----------|-----------|
| Sma-1-14405 | NS_000200.1    | + | 82802526  | 82802575  |
| Sma-1-14406 | NW_003037851.1 | - | 612467    | 612418    |
| Sma-1-14407 | NS_000200.1    | - | 94015777  | 94015728  |
| Sma-1-14408 | NW_003037861.1 | - | 436660    | 436611    |
| Sma-1-14409 | NS_000200.1    | - | 105213114 | 105213065 |
| Sma-1-14410 | NW_003037863.1 | - | 341150    | 341101    |
| Sma-1-14411 | NS_000200.1    | - | 107099517 | 107099468 |
| Sma-1-14412 | NW_003037863.1 | + | 1031140   | 1031189   |
| Sma-1-14413 | NS_000200.1    | + | 107789507 | 107789556 |
| Sma-1-14414 | NW_003037887.1 | + | 1618716   | 1618765   |
| Sma-1-14415 | NW_003038150.1 | + | 411929    | 411978    |
| Sma-1-14416 | NS_000200.1    | + | 132082694 | 132082743 |
| Sma-1-14417 | NS_000200.1    | + | 291890667 | 291890716 |
| Sma-1-14418 | NW_003037888.1 | + | 117113    | 117162    |
| Sma-1-14419 | NS_000200.1    | + | 132325605 | 132325654 |
| Sma-1-14420 | NW_003037860.1 | + | 830550    | 830599    |
| Sma-1-14421 | NS_000200.1    | + | 104573578 | 104573627 |
| Sma-1-14422 | NW_003038247.1 | + | 117149    | 117198    |
| Sma-1-14423 | NS_000200.1    | + | 316065877 | 316065926 |
| Sma-1-14424 | NW_003037800.1 | + | 1260306   | 1260355   |
| Sma-1-14425 | NS_000200.1    | + | 19889666  | 19889715  |
| Sma-1-14426 | NW_003038131.1 | - | 138637    | 138588    |
| Sma-1-14427 | NS_000200.1    | - | 282100481 | 282100432 |
| Sma-1-14428 | NW_003037807.1 | - | 595020    | 594971    |
| Sma-1-14429 | NW_003037827.1 | - | 2331489   | 2331440   |
| Sma-1-14430 | NS_000200.1    | - | 64953630  | 64953581  |
| Sma-1-14431 | NS_000200.1    | - | 30856536  | 30856487  |
| Sma-1-14432 | NW_003037827.1 | - | 969529    | 969480    |
| Sma-1-14433 | NS_000200.1    | - | 63591670  | 63591621  |
| Sma-1-14434 | NW_003037967.1 | - | 55477     | 55428     |
| Sma-1-14435 | NS_000200.1    | - | 199295448 | 199295399 |
| Sma-1-14436 | NW_003037916.1 | - | 196078    | 196029    |
| Sma-1-14437 | NS_000200.1    | - | 163389489 | 163389440 |
| Sma-1-14438 | NW_003037829.1 | - | 627837    | 627788    |
| Sma-1-14439 | NS_000200.1    | - | 66528375  | 66528326  |
| Sma-1-14440 | NW_003037799.1 | - | 1019328   | 1019279   |
| Sma-1-14441 | NS_000200.1    | - | 18009682  | 18009633  |
| Sma-1-14442 | NW_003037970.1 | - | 158725    | 158676    |
| Sma-1-14443 | NS_000200.1    | - | 201214915 | 201214866 |
| Sma-1-14444 | NW_003038250.1 | - | 71737     | 71688     |
| Sma-1-14445 | NW_003037967.1 | - | 647608    | 647559    |
| Sma-1-14446 | NS_000200.1    | - | 318124414 | 318124365 |
| Sma-1-14447 | NS_000200.1    | - | 199887579 | 199887530 |
| Sma-1-14448 | NW_003037793.1 | - | 3467381   | 3467332   |
| Sma-1-14449 | NS_000200.1    | - | 3467381   | 3467332   |
| Sma-1-14450 | NW_003037913.1 | - | 318111    | 318062    |
| Sma-1-14451 | NS_000200.1    | - | 158881862 | 158881813 |
| Sma-1-14452 | NW_003037808.1 | - | 508935    | 508886    |
| Sma-1-14453 | NS_000200.1    | - | 32295572  | 32295523  |
| Sma-1-14454 | NW_003037917.1 | - | 1447945   | 1447896   |
| Sma-1-14455 | NS_000200.1    | - | 166484749 | 166484700 |
| Sma-1-14456 | NW_003037806.1 | - | 653568    | 653519    |

|             |                |   |           |           |
|-------------|----------------|---|-----------|-----------|
| Sma-1-14457 | NS_000200.1    | - | 28848782  | 28848733  |
| Sma-1-14458 | NW_003037973.1 | - | 16303     | 16254     |
| Sma-1-14459 | NS_000200.1    | - | 203998030 | 203997981 |
| Sma-1-14460 | NW_003038086.1 | - | 265571    | 265522    |
| Sma-1-14461 | NS_000200.1    | - | 272514164 | 272514115 |
| Sma-1-14462 | NW_003026456.1 | + | 98342     | 98391     |
| Sma-1-14463 | NW_003037982.1 | + | 1076392   | 1076441   |
| Sma-1-14464 | NS_000200.1    | + | 58021478  | 58021527  |
| Sma-1-14465 | NS_000200.1    | + | 214735587 | 214735636 |
| Sma-1-14466 | NW_003037928.1 | + | 44106     | 44155     |
| Sma-1-14467 | NS_000200.1    | + | 174368059 | 174368108 |
| Sma-1-14468 | NW_003037969.1 | + | 208602    | 208651    |
| Sma-1-14469 | NS_000200.1    | + | 200814729 | 200814778 |
| Sma-1-14470 | NW_003026460.1 | + | 141083    | 141132    |
| Sma-1-14471 | NS_000200.1    | + | 170663289 | 170663338 |
| Sma-1-14472 | NW_003038151.1 | - | 84160     | 84111     |
| Sma-1-14473 | NS_000200.1    | - | 291991403 | 291991354 |
| Sma-1-14474 | NW_003038042.1 | + | 94769     | 94818     |
| Sma-1-14475 | NS_000200.1    | + | 254040368 | 254040417 |
| Sma-1-14476 | NW_003023253.1 | - | 176       | 127       |
| Sma-1-14477 | NW_003038514.1 | + | 194131    | 194180    |
| Sma-1-14478 | NW_003026618.1 | + | 426788    | 426837    |
| Sma-1-14479 | NW_003026465.1 | + | 741113    | 741162    |
| Sma-1-14480 | NW_003037794.1 | - | 1832658   | 1832609   |
| Sma-1-14481 | NW_003037821.1 | - | 969315    | 969266    |
| Sma-1-14482 | NW_003037833.1 | - | 539325    | 539276    |
| Sma-1-14483 | NW_003037863.1 | - | 579855    | 579806    |
| Sma-1-14484 | NW_003037916.1 | + | 462538    | 462587    |
| Sma-1-14485 | NW_003037916.1 | + | 493508    | 493557    |
| Sma-1-14486 | NW_003037925.1 | - | 314375    | 314326    |
| Sma-1-14487 | NW_003038008.1 | - | 622955    | 622906    |
| Sma-1-14488 | NW_003038251.1 | - | 62452     | 62403     |
| Sma-1-14489 | NW_003038507.1 | + | 84405     | 84454     |
| Sma-1-14490 | NW_003026574.1 | + | 96204     | 96253     |
| Sma-1-14491 | NW_003038138.1 | - | 311469    | 311420    |
| Sma-1-14492 | NS_000200.1    | + | 163655949 | 163655998 |
| Sma-1-14493 | NS_000200.1    | + | 163686919 | 163686968 |
| Sma-1-14494 | NS_000200.1    | + | 208133707 | 208133756 |
| Sma-1-14495 | NS_000200.1    | + | 301903537 | 301903586 |
| Sma-1-14496 | NS_000200.1    | + | 322181790 | 322181839 |
| Sma-1-14497 | NS_000200.1    | + | 336753299 | 336753348 |
| Sma-1-14498 | NS_000200.1    | + | 339818670 | 339818719 |
| Sma-1-14499 | NS_000200.1    | - | 368563216 | 368563167 |
| Sma-1-14500 | NS_000200.1    | - | 318394224 | 318394175 |
| Sma-1-14501 | NS_000200.1    | - | 285866784 | 285866735 |
| Sma-1-14502 | NS_000200.1    | - | 226296051 | 226296002 |
| Sma-1-14503 | NS_000200.1    | - | 172716378 | 172716329 |
| Sma-1-14504 | NS_000200.1    | - | 107338222 | 107338173 |
| Sma-1-14505 | NS_000200.1    | - | 72730421  | 72730372  |
| Sma-1-14506 | NS_000200.1    | - | 54113799  | 54113750  |
| Sma-1-14507 | NS_000200.1    | - | 6012253   | 6012204   |
| Sma-1-14508 | NW_003037797.1 | - | 3263590   | 3263541   |

|             |                |   |           |           |
|-------------|----------------|---|-----------|-----------|
| Sma-1-14509 | NS_000200.1    | - | 13691450  | 13691401  |
| Sma-1-14510 | NW_003038016.1 | + | 289331    | 289380    |
| Sma-1-14511 | NS_000200.1    | + | 231405868 | 231405917 |
| Sma-1-14512 | NW_003038020.1 | + | 726502    | 726551    |
| Sma-1-14513 | NS_000200.1    | + | 234693846 | 234693895 |
| Sma-1-14514 | NW_003037906.1 | + | 68613     | 68662     |
| Sma-1-14515 | NS_000200.1    | + | 150376392 | 150376441 |
| Sma-1-14516 | NW_003038049.1 | - | 173401    | 173352    |
| Sma-1-14517 | NS_000200.1    | - | 256148928 | 256148879 |
| Sma-1-14518 | NW_003037577.1 | + | 4         | 53        |
| Sma-1-14519 | NS_000200.1    | + | 372211081 | 372211130 |
| Sma-1-14520 | NW_003037999.1 | + | 270322    | 270373    |
| Sma-1-14521 | NS_000200.1    | + | 221964876 | 221964927 |
| Sma-1-14522 | NW_003037818.1 | + | 1731145   | 1731194   |
| Sma-1-14523 | NW_003037853.1 | - | 322333    | 322284    |
| Sma-1-14524 | NS_000200.1    | + | 50446552  | 50446601  |
| Sma-1-14525 | NS_000200.1    | - | 95814384  | 95814335  |
| Sma-1-14526 | NW_003037814.1 | - | 171911    | 171862    |
| Sma-1-14527 | NS_000200.1    | - | 43155771  | 43155722  |
| Sma-1-14528 | NW_003037873.1 | + | 576594    | 576643    |
| Sma-1-14529 | NS_000200.1    | + | 119315722 | 119315771 |
| Sma-1-14530 | NW_003037908.1 | - | 129409    | 129360    |
| Sma-1-14531 | NS_000200.1    | - | 152602540 | 152602491 |
| Sma-1-14532 | NW_003037896.1 | - | 331130    | 331081    |
| Sma-1-14533 | NS_000200.1    | - | 143251553 | 143251504 |
| Sma-1-14534 | NW_003037838.1 | - | 565883    | 565834    |
| Sma-1-14535 | NS_000200.1    | - | 78564446  | 78564397  |
| Sma-1-14536 | NW_003037827.1 | - | 2266185   | 2266136   |
| Sma-1-14537 | NS_000200.1    | - | 64888326  | 64888277  |
| Sma-1-14538 | NW_003037825.1 | - | 359004    | 358955    |
| Sma-1-14539 | NW_003037825.1 | - | 358859    | 358810    |
| Sma-1-14540 | NS_000200.1    | - | 59488786  | 59488737  |
| Sma-1-14541 | NS_000200.1    | - | 59488641  | 59488592  |
| Sma-1-14542 | NW_003037824.1 | - | 243241    | 243192    |
| Sma-1-14543 | NS_000200.1    | - | 57174181  | 57174132  |
| Sma-1-14544 | NW_003037819.1 | - | 908765    | 908716    |
| Sma-1-14545 | NS_000200.1    | - | 51997030  | 51996981  |
| Sma-1-14546 | NW_003038129.1 | + | 34027     | 34076     |
| Sma-1-14547 | NS_000200.1    | + | 281287374 | 281287423 |
| Sma-1-14548 | NW_003038053.1 | + | 440461    | 440510    |
| Sma-1-14549 | NS_000200.1    | + | 257800556 | 257800605 |
| Sma-1-14550 | NW_003038087.1 | - | 524220    | 524171    |
| Sma-1-14551 | NS_000200.1    | - | 273552621 | 273552572 |
| Sma-1-14552 | NW_003038160.1 | - | 246452    | 246403    |
| Sma-1-14553 | NS_000200.1    | - | 296998383 | 296998334 |
| Sma-1-14554 | NW_003037831.1 | - | 826452    | 826403    |
| Sma-1-14555 | NW_003037887.1 | - | 965757    | 965708    |
| Sma-1-14556 | NS_000200.1    | - | 131429735 | 131429686 |
| Sma-1-14557 | NS_000200.1    | - | 70275754  | 70275705  |
| Sma-1-14558 | NW_003037915.1 | + | 611921    | 611970    |
| Sma-1-14559 | NS_000200.1    | + | 162511907 | 162511956 |
| Sma-1-14560 | NW_003037916.1 | - | 248284    | 248235    |

|             |                |   |           |           |
|-------------|----------------|---|-----------|-----------|
| Sma-1-14561 | NS_000200.1    | - | 163441695 | 163441646 |
| Sma-1-14562 | NW_003037800.1 | - | 252311    | 252262    |
| Sma-1-14563 | NS_000200.1    | - | 18881671  | 18881622  |
| Sma-1-14564 | NW_003037939.1 | + | 768317    | 768366    |
| Sma-1-14565 | NS_000200.1    | + | 183638071 | 183638120 |
| Sma-1-14566 | NW_003037827.1 | + | 456903    | 456952    |
| Sma-1-14567 | NW_003037938.1 | + | 411262    | 411311    |
| Sma-1-14568 | NS_000200.1    | + | 63079044  | 63079093  |
| Sma-1-14569 | NS_000200.1    | + | 182448375 | 182448424 |
| Sma-1-14570 | NW_003035677.1 | - | 59        | 10        |
| Sma-1-14571 | NS_000200.1    | - | 331792728 | 331792679 |
| Sma-1-14572 | NW_003037953.1 | - | 170802    | 170753    |
| Sma-1-14573 | NS_000200.1    | - | 193083853 | 193083804 |
| Sma-1-14574 | NW_003037979.1 | - | 172139    | 172090    |
| Sma-1-14575 | NS_000200.1    | - | 210233159 | 210233110 |
| Sma-1-14576 | NW_003038257.1 | + | 352553    | 352602    |
| Sma-1-14577 | NS_000200.1    | + | 321526881 | 321526930 |
| Sma-1-14578 | NW_003037846.1 | + | 384765    | 384814    |
| Sma-1-14579 | NW_003037904.1 | - | 479579    | 479530    |
| Sma-1-14580 | NW_003038252.1 | - | 354992    | 354943    |
| Sma-1-14581 | NS_000200.1    | + | 88019335  | 88019384  |
| Sma-1-14582 | NS_000200.1    | - | 319210580 | 319210531 |
| Sma-1-14583 | NS_000200.1    | - | 149194078 | 149194029 |
| Sma-1-14584 | NW_003038032.1 | - | 308726    | 308677    |
| Sma-1-14585 | NS_000200.1    | - | 245467886 | 245467837 |
| Sma-1-14586 | NW_003038123.1 | + | 230627    | 230676    |
| Sma-1-14587 | NS_000200.1    | + | 278978794 | 278978843 |
| Sma-1-14588 | NW_003037793.1 | + | 3619368   | 3619417   |
| Sma-1-14589 | NW_003037863.1 | - | 994684    | 994635    |
| Sma-1-14590 | NW_003037890.1 | + | 747967    | 748016    |
| Sma-1-14591 | NS_000200.1    | + | 3619368   | 3619417   |
| Sma-1-14592 | NS_000200.1    | + | 136431328 | 136431377 |
| Sma-1-14593 | NS_000200.1    | - | 107753051 | 107753002 |
| Sma-1-14594 | NW_003037806.1 | + | 1595121   | 1595170   |
| Sma-1-14595 | NS_000200.1    | + | 29790335  | 29790384  |
| Sma-1-14596 | NW_003037804.1 | + | 1364892   | 1364941   |
| Sma-1-14597 | NS_000200.1    | + | 26504912  | 26504961  |
| Sma-1-14598 | NW_003037923.1 | + | 247182    | 247231    |
| Sma-1-14599 | NS_000200.1    | + | 171303395 | 171303444 |
| Sma-1-14600 | NW_003035449.1 | + | 248       | 297       |
| Sma-1-14601 | NW_003037798.1 | - | 2386743   | 2386694   |
| Sma-1-14602 | NS_000200.1    | + | 367483755 | 367483804 |
| Sma-1-14603 | NS_000200.1    | - | 16645901  | 16645852  |
| Sma-1-14604 | NW_003037828.1 | - | 457531    | 457482    |
| Sma-1-14605 | NW_003037841.1 | + | 2100329   | 2100378   |
| Sma-1-14606 | NW_003037856.1 | + | 409982    | 410031    |
| Sma-1-14607 | NW_003037884.1 | - | 519427    | 519378    |
| Sma-1-14608 | NW_003037948.1 | + | 186540    | 186589    |
| Sma-1-14609 | NW_003038037.1 | - | 788204    | 788155    |
| Sma-1-14610 | NS_000200.1    | + | 84711510  | 84711559  |
| Sma-1-14611 | NS_000200.1    | + | 99767938  | 99767987  |
| Sma-1-14612 | NS_000200.1    | + | 192206484 | 192206533 |

|             |                |   |           |           |
|-------------|----------------|---|-----------|-----------|
| Sma-1-14613 | NS_000200.1    | - | 250943613 | 250943564 |
| Sma-1-14614 | NS_000200.1    | - | 127299092 | 127299043 |
| Sma-1-14615 | NS_000200.1    | - | 65547016  | 65546967  |
| Sma-1-14616 | NW_003037795.1 | + | 1220826   | 1220875   |
| Sma-1-14617 | NS_000200.1    | + | 7611709   | 7611758   |
| Sma-1-14618 | NW_003037973.1 | - | 152114    | 152065    |
| Sma-1-14619 | NS_000200.1    | - | 204133841 | 204133792 |
| Sma-1-14620 | NW_003037981.1 | - | 902105    | 902056    |
| Sma-1-14621 | NS_000200.1    | - | 213299973 | 213299924 |
| Sma-1-14622 | NW_003038478.1 | - | 38017     | 37968     |
| Sma-1-14623 | NW_003037831.1 | + | 1759319   | 1759368   |
| Sma-1-14624 | NW_003038076.1 | - | 138395    | 138346    |
| Sma-1-14625 | NS_000200.1    | + | 71208621  | 71208670  |
| Sma-1-14626 | NS_000200.1    | - | 332613051 | 332613002 |
| Sma-1-14627 | NS_000200.1    | - | 266355569 | 266355520 |
| Sma-1-14628 | NW_003038509.1 | + | 259255    | 259304    |
| Sma-1-14629 | NS_000200.1    | + | 337891707 | 337891756 |
| Sma-1-14630 | NW_003026466.1 | - | 130232    | 130183    |
| Sma-1-14631 | NS_000200.1    | - | 215397339 | 215397290 |
| Sma-1-14632 | NW_003026456.1 | - | 148687    | 148638    |
| Sma-1-14633 | NW_003037816.1 | + | 500295    | 500344    |
| Sma-1-14634 | NW_003038261.1 | - | 733105    | 733056    |
| Sma-1-14635 | NW_003026516.1 | + | 341204    | 341253    |
| Sma-1-14636 | NW_003038041.1 | - | 8756      | 8707      |
| Sma-1-14637 | NW_003038156.1 | + | 106735    | 106784    |
| Sma-1-14638 | NS_000200.1    | + | 46709167  | 46709216  |
| Sma-1-14639 | NS_000200.1    | + | 294838848 | 294838897 |
| Sma-1-14640 | NS_000200.1    | + | 299449501 | 299449550 |
| Sma-1-14641 | NS_000200.1    | - | 324346756 | 324346707 |
| Sma-1-14642 | NS_000200.1    | - | 253676038 | 253675989 |
| Sma-1-14643 | NS_000200.1    | - | 58071823  | 58071774  |
| Sma-1-14644 | NW_003021804.1 | + | 996       | 1045      |
| Sma-1-14645 | NS_000200.1    | + | 351888076 | 351888125 |
| Sma-1-14646 | NW_003026456.1 | + | 410419    | 410468    |
| Sma-1-14647 | NW_003037890.1 | - | 1175289   | 1175240   |
| Sma-1-14648 | NW_003037972.1 | + | 237833    | 237882    |
| Sma-1-14649 | NW_003037978.1 | + | 470107    | 470156    |
| Sma-1-14650 | NW_003026576.1 | - | 4670      | 4621      |
| Sma-1-14651 | NS_000200.1    | + | 58333555  | 58333604  |
| Sma-1-14652 | NS_000200.1    | + | 202713537 | 202713586 |
| Sma-1-14653 | NS_000200.1    | + | 209738117 | 209738166 |
| Sma-1-14654 | NS_000200.1    | - | 302632246 | 302632197 |
| Sma-1-14655 | NS_000200.1    | - | 136858650 | 136858601 |
| Sma-1-14656 | NW_003039127.1 | + | 362631    | 362680    |
| Sma-1-14657 | NS_000200.1    | + | 113440130 | 113440179 |
| Sma-1-14658 | NW_003038369.1 | + | 6889      | 6938      |
| Sma-1-14659 | NS_000200.1    | + | 327115828 | 327115877 |
| Sma-1-14660 | NW_003025279.1 | - | 477       | 428       |
| Sma-1-14661 | NW_003034511.1 | - | 1088      | 1039      |
| Sma-1-14662 | NW_003037995.1 | + | 307553    | 307602    |
| Sma-1-14663 | NW_003037793.1 | + | 2731136   | 2731185   |
| Sma-1-14664 | NW_003037795.1 | + | 1587293   | 1587342   |



|             |                |   |           |           |
|-------------|----------------|---|-----------|-----------|
| Sma-1-14665 | NW_003037795.1 | + | 1608481   | 1608530   |
| Sma-1-14666 | NW_003037797.1 | - | 2699823   | 2699774   |
| Sma-1-14667 | NW_003037798.1 | + | 1837390   | 1837439   |
| Sma-1-14668 | NW_003037798.1 | - | 1332824   | 1332775   |
| Sma-1-14669 | NW_003037800.1 | + | 489183    | 489232    |
| Sma-1-14670 | NW_003037800.1 | + | 1609373   | 1609422   |
| Sma-1-14671 | NW_003037802.1 | - | 456626    | 456577    |
| Sma-1-14672 | NW_003037804.1 | - | 1275123   | 1275074   |
| Sma-1-14673 | NW_003037814.1 | - | 1359142   | 1359093   |
| Sma-1-14674 | NW_003037830.1 | + | 296847    | 296896    |
| Sma-1-14675 | NW_003037838.1 | - | 930386    | 930337    |
| Sma-1-14676 | NW_003037863.1 | - | 1019512   | 1019463   |
| Sma-1-14677 | NW_003037903.1 | - | 41163     | 41114     |
| Sma-1-14678 | NW_003037905.1 | - | 437814    | 437765    |
| Sma-1-14679 | NW_003037909.1 | - | 200916    | 200867    |
| Sma-1-14680 | NW_003037924.1 | - | 93219     | 93170     |
| Sma-1-14681 | NW_003037925.1 | - | 346877    | 346828    |
| Sma-1-14682 | NW_003037935.1 | + | 390107    | 390156    |
| Sma-1-14683 | NW_003037938.1 | + | 165507    | 165556    |
| Sma-1-14684 | NW_003037938.1 | - | 84504     | 84455     |
| Sma-1-14685 | NW_003037942.1 | + | 947693    | 947742    |
| Sma-1-14686 | NW_003037953.1 | + | 39209     | 39258     |
| Sma-1-14687 | NW_003037977.1 | + | 814248    | 814297    |
| Sma-1-14688 | NW_003038029.1 | + | 530878    | 530927    |
| Sma-1-14689 | NW_003038031.1 | + | 446461    | 446510    |
| Sma-1-14690 | NW_003038031.1 | - | 439672    | 439623    |
| Sma-1-14691 | NW_003038033.1 | - | 174198    | 174149    |
| Sma-1-14692 | NW_003038033.1 | - | 152293    | 152244    |
| Sma-1-14693 | NW_003038238.1 | + | 42155     | 42204     |
| Sma-1-14694 | NW_003038505.1 | + | 213015    | 213064    |
| Sma-1-14695 | NW_003038086.1 | + | 51657     | 51706     |
| Sma-1-14696 | NW_003038131.1 | + | 109359    | 109408    |
| Sma-1-14697 | NW_003038137.1 | - | 120983    | 120934    |
| Sma-1-14698 | NW_003038148.1 | + | 503097    | 503146    |
| Sma-1-14699 | NS_000200.1    | + | 2731136   | 2731185   |
| Sma-1-14700 | NS_000200.1    | + | 7978176   | 7978225   |
| Sma-1-14701 | NS_000200.1    | + | 7999364   | 7999413   |
| Sma-1-14702 | NS_000200.1    | + | 16096548  | 16096597  |
| Sma-1-14703 | NS_000200.1    | + | 19118543  | 19118592  |
| Sma-1-14704 | NS_000200.1    | + | 20238733  | 20238782  |
| Sma-1-14705 | NS_000200.1    | + | 68187218  | 68187267  |
| Sma-1-14706 | NS_000200.1    | + | 179806642 | 179806691 |
| Sma-1-14707 | NS_000200.1    | + | 182202620 | 182202669 |
| Sma-1-14708 | NS_000200.1    | + | 186707601 | 186707650 |
| Sma-1-14709 | NS_000200.1    | + | 192952260 | 192952309 |
| Sma-1-14710 | NS_000200.1    | + | 209100268 | 209100317 |
| Sma-1-14711 | NS_000200.1    | + | 219997321 | 219997370 |
| Sma-1-14712 | NS_000200.1    | + | 242731779 | 242731828 |
| Sma-1-14713 | NS_000200.1    | + | 244724219 | 244724268 |
| Sma-1-14714 | NS_000200.1    | + | 272300250 | 272300299 |
| Sma-1-14715 | NS_000200.1    | + | 282071203 | 282071252 |
| Sma-1-14716 | NS_000200.1    | + | 290577081 | 290577130 |

|             |                |   |           |           |
|-------------|----------------|---|-----------|-----------|
| Sma-1-14717 | NS_000200.1    | + | 313648936 | 313648985 |
| Sma-1-14718 | NS_000200.1    | + | 336292352 | 336292401 |
| Sma-1-14719 | NS_000200.1    | - | 361531199 | 361531150 |
| Sma-1-14720 | NS_000200.1    | - | 346855793 | 346855744 |
| Sma-1-14721 | NS_000200.1    | - | 284909879 | 284909830 |
| Sma-1-14722 | NS_000200.1    | - | 246154200 | 246154151 |
| Sma-1-14723 | NS_000200.1    | - | 246132295 | 246132246 |
| Sma-1-14724 | NS_000200.1    | - | 244717430 | 244717381 |
| Sma-1-14725 | NS_000200.1    | - | 182121617 | 182121568 |
| Sma-1-14726 | NS_000200.1    | - | 172748880 | 172748831 |
| Sma-1-14727 | NS_000200.1    | - | 171800177 | 171800128 |
| Sma-1-14728 | NS_000200.1    | - | 153742565 | 153742516 |
| Sma-1-14729 | NS_000200.1    | - | 149706826 | 149706777 |
| Sma-1-14730 | NS_000200.1    | - | 147595244 | 147595195 |
| Sma-1-14731 | NS_000200.1    | - | 107777879 | 107777830 |
| Sma-1-14732 | NS_000200.1    | - | 78928949  | 78928900  |
| Sma-1-14733 | NS_000200.1    | - | 44343002  | 44342953  |
| Sma-1-14734 | NS_000200.1    | - | 26415143  | 26415094  |
| Sma-1-14735 | NS_000200.1    | - | 22459420  | 22459371  |
| Sma-1-14736 | NS_000200.1    | - | 15591982  | 15591933  |
| Sma-1-14737 | NS_000200.1    | - | 13127683  | 13127634  |
| Sma-1-14738 | NW_003022296.1 | - | 1395      | 1346      |
| Sma-1-14739 | NW_003023545.1 | + | 1259      | 1308      |
| Sma-1-14740 | NW_003026545.1 | + | 640       | 689       |
| Sma-1-14741 | NW_003036329.1 | + | 711       | 760       |
| Sma-1-14742 | NW_003038504.1 | + | 106500    | 106549    |
| Sma-1-14743 | NW_003026458.1 | - | 256458    | 256409    |
| Sma-1-14744 | NW_003037810.1 | + | 1434826   | 1434875   |
| Sma-1-14745 | NW_003037818.1 | + | 1474757   | 1474806   |
| Sma-1-14746 | NW_003037827.1 | + | 2260801   | 2260850   |
| Sma-1-14747 | NW_003037830.1 | + | 187082    | 187131    |
| Sma-1-14748 | NW_003037834.1 | + | 465400    | 465449    |
| Sma-1-14749 | NW_003037839.1 | - | 1095610   | 1095561   |
| Sma-1-14750 | NW_003037840.1 | + | 475084    | 475133    |
| Sma-1-14751 | NW_003037844.1 | + | 460919    | 460968    |
| Sma-1-14752 | NW_003037854.1 | + | 390858    | 390907    |
| Sma-1-14753 | NW_003037864.1 | + | 1827607   | 1827656   |
| Sma-1-14754 | NW_003037879.1 | - | 590942    | 590893    |
| Sma-1-14755 | NW_003037887.1 | + | 413272    | 413321    |
| Sma-1-14756 | NW_003037894.1 | - | 230038    | 229989    |
| Sma-1-14757 | NW_003037906.1 | + | 583174    | 583223    |
| Sma-1-14758 | NW_003037914.1 | - | 1640491   | 1640442   |
| Sma-1-14759 | NW_003037930.1 | - | 221128    | 221079    |
| Sma-1-14760 | NW_003037943.1 | - | 885266    | 885217    |
| Sma-1-14761 | NW_003037976.1 | - | 570454    | 570405    |
| Sma-1-14762 | NW_003037978.1 | - | 107220    | 107171    |
| Sma-1-14763 | NW_003037980.1 | - | 141315    | 141266    |
| Sma-1-14764 | NW_003038003.1 | + | 350663    | 350712    |
| Sma-1-14765 | NW_003038030.1 | - | 211130    | 211081    |
| Sma-1-14766 | NW_003038037.1 | - | 1646825   | 1646776   |
| Sma-1-14767 | NW_003038260.1 | + | 53803     | 53852     |
| Sma-1-14768 | NW_003026517.1 | + | 182290    | 182339    |

|             |                |   |           |           |
|-------------|----------------|---|-----------|-----------|
| Sma-1-14769 | NW_003038077.1 | - | 423276    | 423227    |
| Sma-1-14770 | NW_003038153.1 | + | 597190    | 597239    |
| Sma-1-14771 | NW_003038177.1 | - | 43730     | 43681     |
| Sma-1-14772 | NS_000200.1    | + | 38039348  | 38039397  |
| Sma-1-14773 | NS_000200.1    | + | 50190164  | 50190213  |
| Sma-1-14774 | NS_000200.1    | + | 64882942  | 64882991  |
| Sma-1-14775 | NS_000200.1    | + | 68077453  | 68077502  |
| Sma-1-14776 | NS_000200.1    | + | 73625886  | 73625935  |
| Sma-1-14777 | NS_000200.1    | + | 81098408  | 81098457  |
| Sma-1-14778 | NS_000200.1    | + | 86644365  | 86644414  |
| Sma-1-14779 | NS_000200.1    | + | 97295279  | 97295328  |
| Sma-1-14780 | NS_000200.1    | + | 110320181 | 110320230 |
| Sma-1-14781 | NS_000200.1    | + | 130877250 | 130877299 |
| Sma-1-14782 | NS_000200.1    | + | 150890953 | 150891002 |
| Sma-1-14783 | NS_000200.1    | + | 223849945 | 223849994 |
| Sma-1-14784 | NS_000200.1    | + | 293659239 | 293659288 |
| Sma-1-14785 | NS_000200.1    | + | 299788299 | 299788348 |
| Sma-1-14786 | NS_000200.1    | + | 300479960 | 300480009 |
| Sma-1-14787 | NS_000200.1    | + | 323225578 | 323225627 |
| Sma-1-14788 | NS_000200.1    | + | 335955032 | 335955081 |
| Sma-1-14789 | NS_000200.1    | + | 359643521 | 359643570 |
| Sma-1-14790 | NS_000200.1    | + | 373614794 | 373614843 |
| Sma-1-14791 | NS_000200.1    | - | 361125851 | 361125802 |
| Sma-1-14792 | NS_000200.1    | - | 300936170 | 300936121 |
| Sma-1-14793 | NS_000200.1    | - | 267194916 | 267194867 |
| Sma-1-14794 | NS_000200.1    | - | 251802234 | 251802185 |
| Sma-1-14795 | NS_000200.1    | - | 243346997 | 243346948 |
| Sma-1-14796 | NS_000200.1    | - | 211102177 | 211102128 |
| Sma-1-14797 | NS_000200.1    | - | 209375230 | 209375181 |
| Sma-1-14798 | NS_000200.1    | - | 207184769 | 207184720 |
| Sma-1-14799 | NS_000200.1    | - | 187906799 | 187906750 |
| Sma-1-14800 | NS_000200.1    | - | 176079092 | 176079043 |
| Sma-1-14801 | NS_000200.1    | - | 161784741 | 161784692 |
| Sma-1-14802 | NS_000200.1    | - | 142126611 | 142126562 |
| Sma-1-14803 | NS_000200.1    | - | 123593198 | 123593149 |
| Sma-1-14804 | NS_000200.1    | - | 102124688 | 102124639 |
| Sma-1-14805 | NS_000200.1    | - | 80053760  | 80053711  |
| Sma-1-14806 | NW_003023042.1 | + | 992       | 1041      |
| Sma-1-14807 | NS_000200.1    | + | 372227656 | 372227705 |
| Sma-1-14808 | NW_003037911.1 | + | 512642    | 512691    |
| Sma-1-14809 | NS_000200.1    | + | 156299995 | 156300044 |
| Sma-1-14810 | NW_003037809.1 | + | 1318213   | 1318262   |
| Sma-1-14811 | NS_000200.1    | + | 34982677  | 34982726  |
| Sma-1-14812 | NW_003037909.1 | + | 718505    | 718554    |
| Sma-1-14813 | NW_003038513.1 | + | 44698     | 44747     |
| Sma-1-14814 | NS_000200.1    | + | 154260154 | 154260203 |
| Sma-1-14815 | NS_000200.1    | + | 339053875 | 339053924 |
| Sma-1-14816 | NW_003037849.1 | + | 83881     | 83930     |
| Sma-1-14817 | NS_000200.1    | + | 91060154  | 91060203  |
| Sma-1-14818 | NW_003037853.1 | - | 998028    | 997979    |
| Sma-1-14819 | NS_000200.1    | - | 96490079  | 96490030  |
| Sma-1-14820 | NW_003038161.1 | - | 537253    | 537204    |

|             |                |   |           |           |
|-------------|----------------|---|-----------|-----------|
| Sma-1-14821 | NS_000200.1    | - | 297907104 | 297907055 |
| Sma-1-14822 | NW_003020123.1 | + | 770       | 819       |
| Sma-1-14823 | NW_003038026.1 | + | 796200    | 796249    |
| Sma-1-14824 | NS_000200.1    | + | 240303961 | 240304010 |
| Sma-1-14825 | NS_000200.1    | + | 371048493 | 371048542 |
| Sma-1-14826 | NW_003026517.1 | + | 744978    | 745027    |
| Sma-1-14827 | NS_000200.1    | + | 300350987 | 300351036 |
| Sma-1-14828 | NW_003035580.1 | - | 13474     | 13425     |
| Sma-1-14829 | NW_003037822.1 | - | 1175367   | 1175318   |
| Sma-1-14830 | NW_003038029.1 | + | 861954    | 862003    |
| Sma-1-14831 | NW_003038029.1 | - | 863508    | 863459    |
| Sma-1-14832 | NS_000200.1    | + | 243062855 | 243062904 |
| Sma-1-14833 | NS_000200.1    | - | 329095068 | 329095019 |
| Sma-1-14834 | NS_000200.1    | - | 243064409 | 243064360 |
| Sma-1-14835 | NS_000200.1    | - | 55483373  | 55483324  |
| Sma-1-14836 | NW_003037793.1 | - | 4109326   | 4109277   |
| Sma-1-14837 | NS_000200.1    | - | 4109326   | 4109277   |
| Sma-1-14838 | NW_003037794.1 | - | 485879    | 485830    |
| Sma-1-14839 | NS_000200.1    | - | 4665474   | 4665425   |
| Sma-1-14840 | NW_003039130.1 | - | 249094    | 249045    |
| Sma-1-14841 | NS_000200.1    | - | 317923705 | 317923656 |
| Sma-1-14842 | NW_003037793.1 | - | 690754    | 690705    |
| Sma-1-14843 | NW_003038252.1 | - | 178081    | 178032    |
| Sma-1-14844 | NW_003038109.1 | - | 25940     | 25891     |
| Sma-1-14845 | NS_000200.1    | - | 319033669 | 319033620 |
| Sma-1-14846 | NS_000200.1    | - | 275708618 | 275708569 |
| Sma-1-14847 | NS_000200.1    | - | 690754    | 690705    |
| Sma-1-14848 | NW_003037793.1 | + | 2572457   | 2572506   |
| Sma-1-14849 | NW_003037940.1 | + | 316253    | 316302    |
| Sma-1-14850 | NW_003026487.1 | + | 120425    | 120474    |
| Sma-1-14851 | NS_000200.1    | + | 2572457   | 2572506   |
| Sma-1-14852 | NS_000200.1    | + | 184058383 | 184058432 |
| Sma-1-14853 | NS_000200.1    | + | 261031119 | 261031168 |
| Sma-1-14854 | NW_003037861.1 | - | 843357    | 843308    |
| Sma-1-14855 | NS_000200.1    | - | 105619811 | 105619762 |
| Sma-1-14856 | NW_003037870.1 | - | 360222    | 360173    |
| Sma-1-14857 | NS_000200.1    | - | 117233887 | 117233838 |
| Sma-1-14858 | NW_003037904.1 | + | 515735    | 515784    |
| Sma-1-14859 | NS_000200.1    | + | 149230234 | 149230283 |
| Sma-1-14860 | NW_003038030.1 | + | 254557    | 254606    |
| Sma-1-14861 | NS_000200.1    | + | 243390424 | 243390473 |
| Sma-1-14862 | NW_003038079.1 | + | 204468    | 204517    |
| Sma-1-14863 | NS_000200.1    | + | 268334456 | 268334505 |
| Sma-1-14864 | NW_003037800.1 | - | 2279044   | 2278995   |
| Sma-1-14865 | NS_000200.1    | - | 20908404  | 20908355  |
| Sma-1-14866 | NW_003037851.1 | + | 115766    | 115815    |
| Sma-1-14867 | NW_003037945.1 | - | 1504436   | 1504387   |
| Sma-1-14868 | NS_000200.1    | + | 93519076  | 93519125  |
| Sma-1-14869 | NS_000200.1    | - | 190606400 | 190606351 |
| Sma-1-14870 | NW_003037847.1 | - | 933260    | 933211    |
| Sma-1-14871 | NW_003038027.1 | - | 676357    | 676308    |
| Sma-1-14872 | NS_000200.1    | - | 241047071 | 241047022 |

|             |                |   |           |           |
|-------------|----------------|---|-----------|-----------|
| Sma-1-14873 | NS_000200.1    | - | 89584990  | 89584941  |
| Sma-1-14874 | NW_003039127.1 | + | 1273906   | 1273955   |
| Sma-1-14875 | NS_000200.1    | + | 114351405 | 114351454 |
| Sma-1-14876 | NW_003037889.1 | + | 1076567   | 1076616   |
| Sma-1-14877 | NS_000200.1    | + | 134853057 | 134853106 |
| Sma-1-14878 | NW_003026611.1 | - | 224108    | 224059    |
| Sma-1-14879 | NW_003037796.1 | + | 2076118   | 2076167   |
| Sma-1-14880 | NW_003037861.1 | + | 845295    | 845344    |
| Sma-1-14881 | NS_000200.1    | + | 10285762  | 10285811  |
| Sma-1-14882 | NS_000200.1    | + | 105621749 | 105621798 |
| Sma-1-14883 | NS_000200.1    | - | 310793892 | 310793843 |
| Sma-1-14884 | NW_003026464.1 | - | 140556    | 140507    |
| Sma-1-14885 | NS_000200.1    | - | 203440865 | 203440816 |
| Sma-1-14886 | NW_003037990.1 | + | 206895    | 206944    |
| Sma-1-14887 | NS_000200.1    | + | 217105654 | 217105703 |
| Sma-1-14888 | NW_003038244.1 | - | 219756    | 219707    |
| Sma-1-14889 | NW_003037809.1 | - | 365942    | 365893    |
| Sma-1-14890 | NS_000200.1    | - | 315364961 | 315364912 |
| Sma-1-14891 | NS_000200.1    | - | 34030406  | 34030357  |
| Sma-1-14892 | NW_003038257.1 | + | 334711    | 334760    |
| Sma-1-14893 | NS_000200.1    | + | 321509039 | 321509088 |
| Sma-1-14894 | NW_003038261.1 | + | 37435     | 37484     |
| Sma-1-14895 | NS_000200.1    | + | 323651086 | 323651135 |
| Sma-1-14896 | NW_003032033.1 | + | 315       | 364       |
| Sma-1-14897 | NW_003026617.1 | + | 127106    | 127155    |
| Sma-1-14898 | NW_003037874.1 | + | 519417    | 519466    |
| Sma-1-14899 | NW_003026594.1 | + | 49640     | 49689     |
| Sma-1-14900 | NW_003038013.1 | - | 264062    | 264013    |
| Sma-1-14901 | NW_003038070.1 | - | 43673     | 43624     |
| Sma-1-14902 | NW_003037793.1 | - | 2793520   | 2793471   |
| Sma-1-14903 | NW_003037819.1 | + | 934051    | 934100    |
| Sma-1-14904 | NW_003037824.1 | - | 639575    | 639526    |
| Sma-1-14905 | NW_003037825.1 | - | 1303555   | 1303506   |
| Sma-1-14906 | NW_003037827.1 | + | 2238996   | 2239045   |
| Sma-1-14907 | NW_003037834.1 | + | 63594     | 63643     |
| Sma-1-14908 | NW_003037842.1 | - | 117363    | 117314    |
| Sma-1-14909 | NW_003037858.1 | - | 1022960   | 1022911   |
| Sma-1-14910 | NW_003037862.1 | - | 781544    | 781495    |
| Sma-1-14911 | NW_003037869.1 | - | 325276    | 325227    |
| Sma-1-14912 | NW_003037878.1 | + | 450882    | 450931    |
| Sma-1-14913 | NW_003037888.1 | + | 1235467   | 1235516   |
| Sma-1-14914 | NW_003037894.1 | + | 354925    | 354974    |
| Sma-1-14915 | NW_003037905.1 | - | 1000764   | 1000715   |
| Sma-1-14916 | NW_003037917.1 | - | 342662    | 342613    |
| Sma-1-14917 | NW_003037918.1 | - | 455706    | 455657    |
| Sma-1-14918 | NW_003037956.1 | + | 127285    | 127334    |
| Sma-1-14919 | NW_003037967.1 | + | 330081    | 330130    |
| Sma-1-14920 | NW_003037970.1 | - | 5031      | 4982      |
| Sma-1-14921 | NW_003038014.1 | - | 47083     | 47034     |
| Sma-1-14922 | NW_003038015.1 | - | 149797    | 149748    |
| Sma-1-14923 | NW_003038037.1 | + | 982246    | 982295    |
| Sma-1-14924 | NW_003038037.1 | + | 1213826   | 1213875   |

|             |                |   |           |           |
|-------------|----------------|---|-----------|-----------|
| Sma-1-14925 | NW_003038037.1 | - | 854928    | 854879    |
| Sma-1-14926 | NW_003038047.1 | + | 78260     | 78309     |
| Sma-1-14927 | NW_003038047.1 | - | 77771     | 77722     |
| Sma-1-14928 | NW_003038096.1 | + | 24419     | 24468     |
| Sma-1-14929 | NW_003038151.1 | + | 154496    | 154545    |
| Sma-1-14930 | NS_000200.1    | + | 52022316  | 52022365  |
| Sma-1-14931 | NS_000200.1    | + | 64861137  | 64861186  |
| Sma-1-14932 | NS_000200.1    | + | 73224080  | 73224129  |
| Sma-1-14933 | NS_000200.1    | + | 119944367 | 119944416 |
| Sma-1-14934 | NS_000200.1    | + | 122504360 | 122504409 |
| Sma-1-14935 | NS_000200.1    | + | 133443959 | 133444008 |
| Sma-1-14936 | NS_000200.1    | + | 142251498 | 142251547 |
| Sma-1-14937 | NS_000200.1    | + | 194183740 | 194183789 |
| Sma-1-14938 | NS_000200.1    | + | 199570052 | 199570101 |
| Sma-1-14939 | NS_000200.1    | + | 251137655 | 251137704 |
| Sma-1-14940 | NS_000200.1    | + | 251369235 | 251369284 |
| Sma-1-14941 | NS_000200.1    | + | 255328259 | 255328308 |
| Sma-1-14942 | NS_000200.1    | + | 274193412 | 274193461 |
| Sma-1-14943 | NS_000200.1    | + | 292061739 | 292061788 |
| Sma-1-14944 | NS_000200.1    | + | 304994010 | 304994059 |
| Sma-1-14945 | NS_000200.1    | + | 319697965 | 319698014 |
| Sma-1-14946 | NS_000200.1    | + | 376897472 | 376897521 |
| Sma-1-14947 | NS_000200.1    | - | 264380914 | 264380865 |
| Sma-1-14948 | NS_000200.1    | - | 255327770 | 255327721 |
| Sma-1-14949 | NS_000200.1    | - | 251010337 | 251010288 |
| Sma-1-14950 | NS_000200.1    | - | 230473287 | 230473238 |
| Sma-1-14951 | NS_000200.1    | - | 229787772 | 229787723 |
| Sma-1-14952 | NS_000200.1    | - | 229653688 | 229653639 |
| Sma-1-14953 | NS_000200.1    | - | 201061221 | 201061172 |
| Sma-1-14954 | NS_000200.1    | - | 167022696 | 167022647 |
| Sma-1-14955 | NS_000200.1    | - | 165379466 | 165379417 |
| Sma-1-14956 | NS_000200.1    | - | 150269776 | 150269727 |
| Sma-1-14957 | NS_000200.1    | - | 116797621 | 116797572 |
| Sma-1-14958 | NS_000200.1    | - | 106433205 | 106433156 |
| Sma-1-14959 | NS_000200.1    | - | 101687236 | 101687187 |
| Sma-1-14960 | NS_000200.1    | - | 85216553  | 85216504  |
| Sma-1-14961 | NS_000200.1    | - | 60433337  | 60433288  |
| Sma-1-14962 | NS_000200.1    | - | 57570515  | 57570466  |
| Sma-1-14963 | NS_000200.1    | - | 2793520   | 2793471   |
| Sma-1-14964 | NW_003038156.1 | + | 10515     | 10564     |
| Sma-1-14965 | NS_000200.1    | + | 294742628 | 294742677 |
| Sma-1-14966 | NW_003037925.1 | - | 203418    | 203369    |
| Sma-1-14967 | NS_000200.1    | - | 172605421 | 172605372 |
| Sma-1-14968 | NW_003037836.1 | + | 270253    | 270302    |
| Sma-1-14969 | NS_000200.1    | + | 75827352  | 75827401  |
| Sma-1-14970 | NW_003037930.1 | - | 276960    | 276911    |
| Sma-1-14971 | NS_000200.1    | - | 176134924 | 176134875 |
| Sma-1-14972 | NW_003037806.1 | + | 1073982   | 1074031   |
| Sma-1-14973 | NS_000200.1    | + | 29269196  | 29269245  |
| Sma-1-14974 | NW_003037819.1 | - | 998905    | 998856    |
| Sma-1-14975 | NW_003037914.1 | + | 1595568   | 1595617   |
| Sma-1-14976 | NS_000200.1    | + | 161739818 | 161739867 |

|             |                |   |           |           |
|-------------|----------------|---|-----------|-----------|
| Sma-1-14977 | NS_000200.1    | - | 52087170  | 52087121  |
| Sma-1-14978 | NW_003038184.1 | - | 7405      | 7356      |
| Sma-1-14979 | NS_000200.1    | - | 301597547 | 301597498 |
| Sma-1-14980 | NW_003026460.1 | + | 374323    | 374372    |
| Sma-1-14981 | NW_003026460.1 | + | 376849    | 376898    |
| Sma-1-14982 | NS_000200.1    | + | 170896529 | 170896578 |
| Sma-1-14983 | NS_000200.1    | + | 170899055 | 170899104 |
| Sma-1-14984 | NW_003037907.1 | - | 158797    | 158748    |
| Sma-1-14985 | NS_000200.1    | - | 151563286 | 151563237 |
| Sma-1-14986 | NW_003037799.1 | + | 910922    | 910971    |
| Sma-1-14987 | NS_000200.1    | + | 17901276  | 17901325  |
| Sma-1-14988 | NW_003037851.1 | + | 355072    | 355121    |
| Sma-1-14989 | NW_003037976.1 | + | 20792     | 20841     |
| Sma-1-14990 | NW_003037992.1 | + | 234657    | 234706    |
| Sma-1-14991 | NW_003038042.1 | + | 95771     | 95820     |
| Sma-1-14992 | NS_000200.1    | + | 93758382  | 93758431  |
| Sma-1-14993 | NS_000200.1    | + | 206635107 | 206635156 |
| Sma-1-14994 | NS_000200.1    | + | 218076138 | 218076187 |
| Sma-1-14995 | NS_000200.1    | + | 254041370 | 254041419 |
| Sma-1-14996 | NW_003037874.1 | + | 194167    | 194216    |
| Sma-1-14997 | NS_000200.1    | + | 119619117 | 119619166 |
| Sma-1-14998 | NW_003037874.1 | - | 286975    | 286926    |
| Sma-1-14999 | NS_000200.1    | - | 119711925 | 119711876 |
| Sma-1-15000 | NW_003037874.1 | - | 591547    | 591498    |
| Sma-1-15001 | NS_000200.1    | - | 120016497 | 120016448 |
| Sma-1-15002 | NW_003037875.1 | + | 332346    | 332395    |
| Sma-1-15003 | NS_000200.1    | + | 120361015 | 120361064 |
| Sma-1-15004 | NW_003038252.1 | - | 6327      | 6278      |
| Sma-1-15005 | NS_000200.1    | - | 318861915 | 318861866 |
| Sma-1-15006 | NW_003037793.1 | - | 3164641   | 3164593   |
| Sma-1-15007 | NS_000200.1    | - | 3164641   | 3164593   |
| Sma-1-15008 | NW_003037923.1 | + | 326296    | 326345    |
| Sma-1-15009 | NS_000200.1    | + | 171382509 | 171382558 |
| Sma-1-15010 | NW_003037803.1 | + | 1283002   | 1283050   |
| Sma-1-15011 | NS_000200.1    | + | 24783539  | 24783587  |
| Sma-1-15012 | NW_003037820.1 | - | 282140    | 282092    |
| Sma-1-15013 | NS_000200.1    | - | 52555122  | 52555074  |
| Sma-1-15014 | NW_003037980.1 | + | 947079    | 947128    |
| Sma-1-15015 | NS_000200.1    | + | 211907941 | 211907990 |
| Sma-1-15016 | NW_003037829.1 | - | 744814    | 744765    |
| Sma-1-15017 | NS_000200.1    | - | 66645352  | 66645303  |
| Sma-1-15018 | NW_003038442.1 | + | 840       | 892       |
| Sma-1-15019 | NS_000200.1    | + | 329856893 | 329856945 |
| Sma-1-15020 | NW_003038073.1 | + | 3964      | 4016      |
| Sma-1-15021 | NW_003038073.1 | - | 5324      | 5272      |
| Sma-1-15022 | NS_000200.1    | + | 265526397 | 265526449 |
| Sma-1-15023 | NS_000200.1    | - | 265527757 | 265527705 |
| Sma-1-15024 | NW_003038261.1 | - | 974287    | 974238    |
| Sma-1-15025 | NS_000200.1    | - | 324587938 | 324587889 |
| Sma-1-15026 | NW_003038152.1 | - | 92888     | 92839     |
| Sma-1-15027 | NS_000200.1    | - | 292698612 | 292698563 |
| Sma-1-15028 | NW_003038508.1 | - | 69689     | 69640     |

|             |                |   |           |           |
|-------------|----------------|---|-----------|-----------|
| Sma-1-15029 | NW_003038976.1 | - | 1273      | 1224      |
| Sma-1-15030 | NS_000200.1    | - | 357174454 | 357174405 |
| Sma-1-15031 | NS_000200.1    | - | 337176657 | 337176608 |
| Sma-1-15032 | NW_003037841.1 | - | 1291430   | 1291381   |
| Sma-1-15033 | NS_000200.1    | - | 83902611  | 83902562  |
| Sma-1-15034 | NW_003037849.1 | + | 459154    | 459203    |
| Sma-1-15035 | NS_000200.1    | + | 91435427  | 91435476  |
| Sma-1-15036 | NW_003026462.1 | - | 224617    | 224568    |
| Sma-1-15037 | NS_000200.1    | - | 196892120 | 196892071 |
| Sma-1-15038 | NW_003039130.1 | - | 138337    | 138287    |
| Sma-1-15039 | NS_000200.1    | - | 317812948 | 317812898 |
| Sma-1-15040 | NW_003037523.1 | - | 794       | 745       |
| Sma-1-15041 | NS_000200.1    | - | 370842084 | 370842035 |
| Sma-1-15042 | NW_003038462.1 | + | 46667     | 46716     |
| Sma-1-15043 | NS_000200.1    | + | 331414330 | 331414379 |
| Sma-1-15044 | NW_003037979.1 | - | 66911     | 66862     |
| Sma-1-15045 | NS_000200.1    | - | 210127931 | 210127882 |
| Sma-1-15046 | NW_003037804.1 | + | 798530    | 798579    |
| Sma-1-15047 | NS_000200.1    | + | 25938550  | 25938599  |
| Sma-1-15048 | NW_003037816.1 | + | 538155    | 538205    |
| Sma-1-15049 | NS_000200.1    | + | 46747027  | 46747077  |
| Sma-1-15050 | NW_003037800.1 | - | 2167381   | 2167333   |
| Sma-1-15051 | NS_000200.1    | - | 20796741  | 20796693  |
| Sma-1-15052 | NW_003037942.1 | + | 980838    | 980886    |
| Sma-1-15053 | NS_000200.1    | + | 186740746 | 186740794 |
| Sma-1-15054 | NW_003038156.1 | - | 280574    | 280526    |
| Sma-1-15055 | NS_000200.1    | - | 295012687 | 295012639 |
| Sma-1-15056 | NW_003021529.1 | + | 91        | 139       |
| Sma-1-15057 | NS_000200.1    | + | 348025990 | 348026038 |
| Sma-1-15058 | NW_003037905.1 | + | 828588    | 828636    |
| Sma-1-15059 | NS_000200.1    | + | 150097600 | 150097648 |
| Sma-1-15060 | NW_003038038.1 | - | 528772    | 528722    |
| Sma-1-15061 | NS_000200.1    | - | 252432165 | 252432115 |
| Sma-1-15062 | NW_003038152.1 | - | 111465    | 111415    |
| Sma-1-15063 | NS_000200.1    | - | 292717189 | 292717139 |
| Sma-1-15064 | NW_003038163.1 | + | 322069    | 322118    |
| Sma-1-15065 | NS_000200.1    | + | 298722349 | 298722398 |
| Sma-1-15066 | NW_003037917.1 | + | 347103    | 347152    |
| Sma-1-15067 | NS_000200.1    | + | 165383907 | 165383956 |
| Sma-1-15068 | NW_003037915.1 | + | 115193    | 115242    |
| Sma-1-15069 | NS_000200.1    | + | 162015179 | 162015228 |
| Sma-1-15070 | NW_003026517.1 | - | 340589    | 340540    |
| Sma-1-15071 | NS_000200.1    | - | 299946598 | 299946549 |
| Sma-1-15072 | NW_003037937.1 | - | 795971    | 795922    |
| Sma-1-15073 | NS_000200.1    | - | 181995880 | 181995831 |
| Sma-1-15074 | NW_003038249.1 | - | 238805    | 238756    |
| Sma-1-15075 | NS_000200.1    | - | 316921058 | 316921009 |
| Sma-1-15076 | NW_003026591.1 | - | 46217     | 46168     |
| Sma-1-15077 | NS_000200.1    | - | 303995045 | 303994996 |
| Sma-1-15078 | NW_003026517.1 | + | 283544    | 283593    |
| Sma-1-15079 | NS_000200.1    | + | 299889553 | 299889602 |
| Sma-1-15080 | NW_003038027.1 | - | 751168    | 751119    |



|             |                |   |           |           |
|-------------|----------------|---|-----------|-----------|
| Sma-1-15081 | NS_000200.1    | - | 241121882 | 241121833 |
| Sma-1-15082 | NW_003038505.1 | - | 195716    | 195667    |
| Sma-1-15083 | NS_000200.1    | - | 336275053 | 336275004 |
| Sma-1-15084 | NW_003038027.1 | - | 868522    | 868474    |
| Sma-1-15085 | NS_000200.1    | - | 241239236 | 241239188 |
| Sma-1-15086 | NW_003037886.1 | + | 1079935   | 1079983   |
| Sma-1-15087 | NS_000200.1    | + | 130335502 | 130335550 |
| Sma-1-15088 | NW_003038031.1 | - | 662724    | 662676    |
| Sma-1-15089 | NS_000200.1    | - | 244940482 | 244940434 |
| Sma-1-15090 | NW_003037888.1 | - | 70639     | 70590     |
| Sma-1-15091 | NS_000200.1    | - | 132279131 | 132279082 |
| Sma-1-15092 | NW_003026459.1 | - | 245102    | 245053    |
| Sma-1-15093 | NS_000200.1    | - | 141890375 | 141890326 |
| Sma-1-15094 | NW_003032051.1 | - | 368       | 317       |
| Sma-1-15095 | NS_000200.1    | - | 377004531 | 377004480 |
| Sma-1-15096 | NW_003037797.1 | + | 3439771   | 3439819   |
| Sma-1-15097 | NS_000200.1    | + | 13867631  | 13867679  |
| Sma-1-15098 | NW_003039127.1 | - | 724127    | 724050    |
| Sma-1-15099 | NS_000200.1    | - | 113801626 | 113801549 |
| Sma-1-15100 | NW_003037980.1 | + | 1256927   | 1257004   |
| Sma-1-15101 | NS_000200.1    | + | 212217789 | 212217866 |
| Sma-1-15102 | NW_003038028.1 | - | 755361    | 755284    |
| Sma-1-15103 | NS_000200.1    | - | 242062935 | 242062858 |
| Nve-1-172   | NW_001834409.1 | + | 519287    | 519335    |
| Nve-1-173   | NW_001834348.1 | - | 450000    | 449952    |
| Nve-1-174   | NW_001834300.1 | - | 629072    | 629027    |
| Nve-1-175   | NW_001827811.1 | + | 868       | 916       |
| Nve-1-176   | NW_001834180.1 | - | 275733    | 275685    |
| Nve-1-177   | NW_001834333.1 | - | 684521    | 684473    |
| Nve-1-178   | NW_001834362.1 | - | 515646    | 515598    |
| Nve-1-179   | NW_001834396.1 | - | 401172    | 401126    |
| Nve-1-180   | NW_001828687.1 | + | 71        | 118       |
| Nve-1-181   | NW_001834410.1 | + | 2514185   | 2514232   |
| Nve-1-182   | NW_001834075.1 | + | 31649     | 31697     |
| Nve-1-183   | NW_001834045.1 | - | 51750     | 51701     |
| Nve-1-184   | NW_001834291.1 | - | 96651     | 96603     |
| Nve-1-185   | NW_001834336.1 | + | 693860    | 693908    |
| Nve-1-186   | NW_001833989.1 | - | 26445     | 26396     |
| Nve-1-187   | NW_001834300.1 | + | 229171    | 229219    |
| Nve-1-188   | NW_001834204.1 | + | 401293    | 401341    |
| Nve-1-189   | NW_001834237.1 | + | 493       | 541       |
| Nve-1-190   | NW_001834359.1 | + | 1061534   | 1061582   |
| Nve-1-191   | NW_001834284.1 | + | 504381    | 504429    |
| Nve-1-192   | NW_001834287.1 | + | 339219    | 339267    |
| Nve-1-193   | NW_001834353.1 | - | 66232     | 66184     |
| Nve-1-194   | NW_001834393.1 | - | 1589950   | 1589902   |
| Nve-1-195   | NW_001834400.1 | - | 960257    | 960209    |
| Nve-1-196   | NW_001834402.1 | + | 5         | 53        |
| Nve-1-197   | NW_001834409.1 | + | 1966176   | 1966225   |
| Nve-1-198   | NW_001834411.1 | + | 2584674   | 2584722   |
| Nve-1-199   | NW_001833976.1 | + | 55150     | 55199     |
| Nve-1-200   | NW_001834140.1 | + | 121642    | 121691    |

|           |                |   |        |        |
|-----------|----------------|---|--------|--------|
| Nve-1-201 | NW_001832857.1 | + | 4362   | 4408   |
| Nve-1-202 | NW_001834212.1 | - | 295324 | 295273 |
| Nve-1-203 | NW_001825820.1 | - | 439    | 393    |
| Nve-1-204 | NW_001834093.1 | - | 129941 | 129895 |
| Nve-1-205 | NW_001834315.1 | - | 176930 | 176881 |
| Nve-1-206 | NW_001834331.1 | - | 348983 | 348934 |
| Nve-1-207 | NW_001834339.1 | - | 360768 | 360721 |
| Nve-1-208 | NW_001834123.1 | - | 91429  | 91382  |
| Nve-1-209 | NW_001834106.1 | + | 233614 | 233662 |
| Nve-1-210 | NW_001834348.1 | - | 116614 | 116566 |
| Nve-1-211 | NW_001834362.1 | + | 625452 | 625500 |
| Nve-1-212 | NW_001834409.1 | + | 285421 | 285469 |
| Nve-1-213 | NW_001834352.1 | - | 589991 | 589943 |
| Nve-1-214 | NW_001834394.1 | - | 130164 | 130116 |
| Nve-1-215 | NW_001834329.1 | + | 256845 | 256893 |
| Nve-1-216 | NW_001833889.1 | + | 36409  | 36457  |
| Nve-1-217 | NW_001834014.1 | - | 129399 | 129351 |
| Nve-1-218 | NW_001834195.1 | + | 255667 | 255715 |
| Nve-1-219 | NW_001834160.1 | + | 68964  | 69012  |
| Nve-1-220 | NW_001834377.1 | + | 691392 | 691440 |
| Nve-1-221 | NW_001834157.1 | - | 312036 | 311988 |
| Nve-1-222 | NW_001823964.1 | + | 290    | 338    |
| Nve-1-223 | NW_001827969.1 | + | 1633   | 1681   |
| Nve-1-224 | NW_001833817.1 | + | 13653  | 13701  |
| Nve-1-225 | NW_001833817.1 | + | 14012  | 14060  |
| Nve-1-226 | NW_001833817.1 | + | 14339  | 14387  |
| Nve-1-227 | NW_001833817.1 | + | 14693  | 14741  |
| Nve-1-228 | NW_001833903.1 | + | 12780  | 12828  |
| Nve-1-229 | NW_001833903.1 | + | 15273  | 15321  |
| Nve-1-230 | NW_001833934.1 | - | 130984 | 130936 |
| Nve-1-231 | NW_001833934.1 | - | 127083 | 127035 |
| Nve-1-232 | NW_001833934.1 | - | 126727 | 126679 |
| Nve-1-233 | NW_001833934.1 | - | 126372 | 126324 |
| Nve-1-234 | NW_001833934.1 | - | 126017 | 125969 |
| Nve-1-235 | NW_001833934.1 | - | 125662 | 125614 |
| Nve-1-236 | NW_001833934.1 | - | 125307 | 125259 |
| Nve-1-237 | NW_001833934.1 | - | 124951 | 124903 |
| Nve-1-238 | NW_001833989.1 | - | 26090  | 26042  |
| Nve-1-239 | NW_001833998.1 | + | 110246 | 110294 |
| Nve-1-240 | NW_001834016.1 | - | 96284  | 96236  |
| Nve-1-241 | NW_001834016.1 | - | 95930  | 95882  |
| Nve-1-242 | NW_001834044.1 | + | 186338 | 186386 |
| Nve-1-243 | NW_001834044.1 | + | 186692 | 186740 |
| Nve-1-244 | NW_001834044.1 | + | 187720 | 187768 |
| Nve-1-245 | NW_001834044.1 | + | 188074 | 188122 |
| Nve-1-246 | NW_001834081.1 | - | 9057   | 9009   |
| Nve-1-247 | NW_001834081.1 | - | 8703   | 8655   |
| Nve-1-248 | NW_001834193.1 | + | 342358 | 342406 |
| Nve-1-249 | NW_001834193.1 | + | 342713 | 342761 |
| Nve-1-250 | NW_001834193.1 | + | 343066 | 343114 |
| Nve-1-251 | NW_001834193.1 | + | 343421 | 343469 |
| Nve-1-252 | NW_001834193.1 | + | 343776 | 343824 |

|           |                |   |         |         |
|-----------|----------------|---|---------|---------|
| Nve-1-253 | NW_001834212.1 | + | 186510  | 186558  |
| Nve-1-254 | NW_001834212.1 | + | 186864  | 186912  |
| Nve-1-255 | NW_001834315.1 | - | 176571  | 176523  |
| Nve-1-256 | NW_001834355.1 | - | 258795  | 258747  |
| Nve-1-257 | NW_001834394.1 | - | 131983  | 131935  |
| Nve-1-258 | NW_001834394.1 | - | 130518  | 130470  |
| Nve-1-259 | NW_001834409.1 | - | 1095577 | 1095529 |
| Nve-1-260 | NW_001832444.1 | + | 15592   | 15640   |
| Nve-1-261 | NW_001834000.1 | + | 77564   | 77612   |
| Nve-1-262 | NW_001834252.1 | - | 488487  | 488439  |
| Nve-1-263 | NW_001834280.1 | + | 547077  | 547125  |
| Nve-1-264 | NW_001834352.1 | - | 589637  | 589589  |
| Nve-1-265 | NW_001834399.1 | - | 1280612 | 1280564 |
| Nve-1-266 | NW_001834402.1 | + | 359     | 407     |
| Nve-1-267 | NW_001833820.1 | - | 11840   | 11792   |
| Nve-1-268 | NW_001834411.1 | + | 54433   | 54481   |
| Nve-1-269 | NW_001825686.1 | + | 447     | 495     |
| Nve-1-270 | NW_001834402.1 | - | 1787006 | 1786958 |
| Nve-1-271 | NW_001834168.1 | + | 122822  | 122870  |
| Nve-1-272 | NW_001834168.1 | + | 323855  | 323903  |
| Nve-1-273 | NW_001834193.1 | - | 341001  | 340953  |
| Nve-1-274 | NW_001834272.1 | + | 114134  | 114182  |
| Nve-1-275 | NW_001834285.1 | + | 169699  | 169747  |
| Nve-1-276 | NW_001834274.1 | + | 15718   | 15766   |
| Nve-1-277 | NW_001834274.1 | + | 16072   | 16120   |
| Nve-1-278 | NW_001834274.1 | + | 28844   | 28892   |
| Nve-1-279 | NW_001834274.1 | + | 29552   | 29600   |
| Nve-1-280 | NW_001834391.1 | + | 1300956 | 1301004 |
| Nve-1-281 | NW_001834016.1 | + | 67712   | 67760   |
| Nve-1-282 | NW_001828027.1 | - | 3618    | 3570    |
| Nve-1-283 | NW_001833409.1 | + | 37400   | 37448   |
| Nve-1-284 | NW_001834016.1 | + | 98381   | 98429   |
| Nve-1-285 | NW_001834157.1 | - | 331331  | 331283  |
| Nve-1-286 | NW_001833422.1 | - | 58      | 10      |
| Nve-1-287 | NW_001824545.1 | - | 1082    | 1034    |
| Nve-1-288 | NW_001834244.1 | - | 474243  | 474195  |
| Nve-1-289 | NW_001834296.1 | + | 382794  | 382842  |
| Nve-1-290 | NW_001834388.1 | - | 1307215 | 1307167 |
| Nve-1-291 | NW_001834333.1 | - | 81235   | 81186   |
| Nve-1-292 | NW_001834396.1 | - | 400835  | 400788  |
| Nve-1-293 | NW_001834339.1 | - | 235427  | 235379  |
| Nve-1-294 | NW_001834380.1 | + | 35694   | 35742   |
| Nve-1-295 | NW_001832756.1 | + | 11773   | 11821   |
| Nve-1-296 | NW_001834219.1 | + | 127097  | 127145  |
| Nve-1-297 | NW_001834397.1 | - | 1090783 | 1090735 |
| Nve-1-298 | NW_001834200.1 | - | 209948  | 209900  |
| Nve-1-299 | NW_001833707.1 | + | 17040   | 17088   |
| Nve-1-300 | NW_001834166.1 | - | 190350  | 190302  |
| Nve-1-301 | NW_001833707.1 | + | 17394   | 17442   |
| Nve-1-302 | NW_001834166.1 | - | 231041  | 230993  |
| Nve-1-303 | NW_001834166.1 | - | 230333  | 230285  |
| Nve-1-304 | NW_001834339.1 | + | 754416  | 754464  |

|           |                |   |         |         |
|-----------|----------------|---|---------|---------|
| Nve-1-305 | NW_001832614.1 | - | 10332   | 10284   |
| Nve-1-306 | NW_001834295.1 | + | 395430  | 395478  |
| Nve-1-307 | NW_001834295.1 | + | 399458  | 399506  |
| Nve-1-308 | NW_001834412.1 | + | 1268476 | 1268524 |
| Nve-1-309 | NW_001834298.1 | - | 633408  | 633360  |
| Nve-1-310 | NW_001834369.1 | - | 1067371 | 1067323 |
| Nve-1-311 | NW_001834402.1 | - | 147248  | 147200  |
| Nve-1-312 | NW_001833923.1 | + | 82526   | 82574   |
| Nve-1-313 | NW_001834166.1 | - | 231395  | 231347  |
| Nve-1-314 | NW_001834383.1 | - | 861661  | 861613  |
| Nve-1-315 | NW_001834368.1 | - | 614456  | 614408  |
| Nve-1-316 | NW_001834361.1 | - | 281046  | 280997  |
| Nve-1-317 | NW_001834392.1 | + | 1285841 | 1285890 |
| Nve-1-318 | NW_001833631.1 | - | 19254   | 19205   |
| Nve-1-319 | NW_001834204.1 | - | 282061  | 282012  |
| Nve-1-320 | NW_001834404.1 | + | 217218  | 217267  |
| Nve-1-321 | NW_001834404.1 | + | 1946468 | 1946517 |
| Nve-1-322 | NW_001834304.1 | + | 315768  | 315817  |
| Nve-1-323 | NW_001834294.1 | - | 106646  | 106598  |
| Nve-1-324 | NW_001830134.1 | - | 6880    | 6832    |
| Nve-1-325 | NW_001832797.1 | - | 9426    | 9378    |
| Nve-1-326 | NW_001833807.1 | - | 65583   | 65535   |
| Nve-1-327 | NW_001834226.1 | + | 54821   | 54869   |
| Nve-1-328 | NW_001833934.1 | - | 36018   | 35970   |
| Nve-1-329 | NW_001834347.1 | - | 836767  | 836719  |
| Nve-1-330 | NW_001834249.1 | - | 143465  | 143417  |
| Nve-1-331 | NW_001832410.1 | + | 4633    | 4681    |
| Nve-1-332 | NW_001826320.1 | - | 1152    | 1104    |
| Nve-1-333 | NW_001834163.1 | + | 13886   | 13934   |
| Nve-1-334 | NW_001834413.1 | + | 950886  | 950934  |
| Nve-1-335 | NW_001831272.1 | - | 8136    | 8088    |
| Nve-1-336 | NW_001834299.1 | - | 375315  | 375267  |
| Nve-1-337 | NW_001832256.1 | + | 10966   | 11014   |
| Nve-1-338 | NW_001833835.1 | - | 1564    | 1516    |
| Nve-1-339 | NW_001834406.1 | - | 1261735 | 1261687 |
| Nve-1-340 | NW_001834149.1 | + | 271450  | 271498  |
| Nve-1-341 | NW_001834326.1 | - | 448399  | 448351  |
| Nve-1-342 | NW_001834291.1 | - | 622001  | 621953  |
| Nve-1-343 | NW_001834310.1 | + | 518739  | 518787  |
| Nve-1-344 | NW_001834404.1 | - | 149626  | 149578  |
| Nve-1-345 | NW_001834343.1 | - | 573534  | 573486  |
| Nve-1-346 | NW_001834166.1 | - | 231749  | 231701  |
| Nve-1-347 | NW_001834166.1 | - | 222915  | 222867  |
| Nve-1-348 | NW_001834373.1 | - | 774860  | 774812  |
| Nve-1-349 | NW_001834166.1 | - | 230686  | 230638  |
| Nve-1-350 | NW_001834404.1 | - | 349043  | 348995  |
| Nve-1-351 | NW_001832257.1 | - | 4946    | 4898    |
| Nve-1-352 | NW_001834378.1 | - | 1024300 | 1024252 |
| Nve-1-353 | NW_001834306.1 | + | 549175  | 549220  |
| Nve-1-354 | NW_001834398.1 | + | 56680   | 56728   |
| Nve-1-355 | NW_001834378.1 | - | 906453  | 906405  |
| Nve-1-356 | NW_001826742.1 | + | 529     | 577     |

|           |                |   |         |         |
|-----------|----------------|---|---------|---------|
| Nve-1-357 | NW_001834296.1 | + | 596770  | 596818  |
| Nve-1-358 | NW_001834357.1 | + | 37516   | 37564   |
| Nve-1-359 | NW_001833077.1 | + | 1722    | 1770    |
| Nve-1-360 | NW_001833077.1 | + | 2042    | 2090    |
| Nve-1-361 | NW_001833864.1 | - | 699     | 651     |
| Nve-1-362 | NW_001833864.1 | - | 344     | 296     |
| Nve-1-363 | NW_001833934.1 | - | 35669   | 35621   |
| Nve-1-364 | NW_001833955.1 | + | 66558   | 66606   |
| Nve-1-365 | NW_001834177.1 | + | 133396  | 133444  |
| Nve-1-366 | NW_001834220.1 | - | 62018   | 61970   |
| Nve-1-367 | NW_001834306.1 | - | 548901  | 548853  |
| Nve-1-368 | NW_001834306.1 | - | 188834  | 188786  |
| Nve-1-369 | NW_001834348.1 | + | 116756  | 116804  |
| Nve-1-370 | NW_001834408.1 | - | 305453  | 305405  |
| Nve-1-371 | NW_001834410.1 | - | 1649158 | 1649110 |
| Nve-1-372 | NW_001834393.1 | - | 816593  | 816545  |
| Nve-1-373 | NW_001834086.1 | + | 61754   | 61802   |
| Nve-1-374 | NW_001834216.1 | + | 145685  | 145733  |
| Nve-1-375 | NW_001834234.1 | - | 410112  | 410064  |
| Nve-1-376 | NW_001834401.1 | - | 1804231 | 1804183 |
| Nve-1-377 | NW_001834401.1 | - | 1799980 | 1799932 |
| Nve-1-378 | NW_001833827.1 | - | 38808   | 38760   |
| Nve-1-379 | NW_001834186.1 | + | 99741   | 99789   |
| Nve-1-380 | NW_001834225.1 | - | 222694  | 222646  |
| Nve-1-381 | NW_001834352.1 | - | 344105  | 344057  |
| Nve-1-382 | NW_001834408.1 | + | 305974  | 306022  |
| Nve-1-383 | NW_001834176.1 | - | 116628  | 116580  |
| Nve-1-384 | NW_001834132.1 | + | 39241   | 39289   |
| Nve-1-385 | NW_001834110.1 | - | 44953   | 44905   |
| Nve-1-386 | NW_001834014.1 | - | 34908   | 34860   |
| Nve-1-387 | NW_001833780.1 | + | 15710   | 15758   |
| Nve-1-388 | NW_001834024.1 | - | 94775   | 94727   |
| Nve-1-389 | NW_001834222.1 | - | 303173  | 303125  |
| Nve-1-390 | NW_001834234.1 | - | 423927  | 423879  |
| Nve-1-391 | NW_001834234.1 | - | 423578  | 423530  |
| Nve-1-392 | NW_001834256.1 | + | 350442  | 350490  |
| Nve-1-393 | NW_001834256.1 | - | 511850  | 511802  |
| Nve-1-394 | NW_001834336.1 | - | 303230  | 303182  |
| Nve-1-395 | NW_001834383.1 | - | 627145  | 627097  |
| Nve-1-396 | NW_001834291.1 | - | 622355  | 622307  |
| Nve-1-397 | NW_001834396.1 | + | 402347  | 402395  |
| Nve-1-398 | NW_001834406.1 | - | 1261380 | 1261332 |
| Nve-1-399 | NW_001833771.1 | + | 35376   | 35424   |
| Nve-1-400 | NW_001834027.1 | + | 93993   | 94041   |
| Nve-1-401 | NW_001834381.1 | - | 896250  | 896202  |
| Nve-1-402 | NW_001833678.1 | - | 49318   | 49270   |
| Nve-1-403 | NW_001834304.1 | - | 262973  | 262925  |
| Nve-1-404 | NW_001832852.1 | - | 13691   | 13643   |
| Nve-1-405 | NW_001832852.1 | - | 9847    | 9799    |
| Nve-1-406 | NW_001824109.1 | + | 463     | 511     |
| Nve-1-407 | NW_001834222.1 | + | 126418  | 126466  |
| Nve-1-408 | NW_001834222.1 | - | 125595  | 125547  |

|           |                |   |         |         |
|-----------|----------------|---|---------|---------|
| Nve-1-409 | NW_001834362.1 | + | 1073047 | 1073095 |
| Nve-1-410 | NW_001834377.1 | + | 690683  | 690731  |
| Nve-1-411 | NW_001834378.1 | + | 726932  | 726980  |
| Nve-1-412 | NW_001833814.1 | + | 49014   | 49065   |
| Nve-1-413 | NW_001834234.1 | + | 204301  | 204349  |
| Nve-1-414 | NW_001834180.1 | + | 52282   | 52330   |
| Nve-1-415 | NW_001834216.1 | + | 5589    | 5637    |
| Nve-1-416 | NW_001834170.1 | - | 139333  | 139285  |
| Nve-1-417 | NW_001834293.1 | - | 219242  | 219194  |
| Nve-1-418 | NW_001834355.1 | - | 1026407 | 1026359 |
| Nve-1-419 | NW_001834216.1 | + | 3789    | 3837    |
| Nve-1-420 | NW_001834348.1 | + | 956860  | 956908  |
| Nve-1-421 | NW_001834216.1 | + | 6258    | 6306    |
| Nve-1-422 | NW_001834239.1 | - | 45882   | 45834   |
| Nve-1-423 | NW_001834293.1 | - | 225369  | 225321  |
| Nve-1-424 | NW_001834293.1 | - | 219595  | 219547  |
| Nve-1-425 | NW_001833971.1 | - | 32933   | 32885   |
| Nve-1-426 | NW_001834020.1 | + | 148988  | 149036  |
| Nve-1-427 | NW_001834220.1 | - | 278118  | 278070  |
| Nve-1-428 | NW_001834395.1 | - | 1111234 | 1111186 |
| Nve-1-429 | NW_001834062.1 | + | 100334  | 100382  |
| Nve-1-430 | NW_001834246.1 | + | 181973  | 182021  |
| Nve-1-431 | NW_001834278.1 | + | 406850  | 406898  |
| Nve-1-432 | NW_001834300.1 | - | 626622  | 626574  |
| Nve-1-433 | NW_001825290.1 | - | 1015    | 967     |
| Nve-1-434 | NW_001834338.1 | + | 354215  | 354263  |
| Nve-1-435 | NW_001830916.1 | - | 6308    | 6260    |
| Nve-1-436 | NW_001833027.1 | + | 271     | 319     |
| Nve-1-437 | NW_001834103.1 | + | 24742   | 24790   |
| Nve-1-438 | NW_001834103.1 | - | 128932  | 128884  |
| Nve-1-439 | NW_001834103.1 | - | 128578  | 128530  |
| Nve-1-440 | NW_001834269.1 | + | 295803  | 295851  |
| Nve-1-441 | NW_001834272.1 | + | 111468  | 111516  |
| Nve-1-442 | NW_001834372.1 | - | 247942  | 247894  |
| Nve-1-443 | NW_001834094.1 | + | 50417   | 50465   |
| Nve-1-444 | NW_001834339.1 | + | 360842  | 360890  |
| Nve-1-445 | NW_001834341.1 | - | 384673  | 384625  |
| Nve-1-446 | NW_001834368.1 | + | 445297  | 445345  |
| Nve-1-447 | NW_001834388.1 | + | 1038723 | 1038771 |
| Nve-1-448 | NW_001833387.1 | - | 2082    | 2034    |
| Nve-1-449 | NW_001834166.1 | - | 223271  | 223223  |
| Nve-1-450 | NW_001834319.1 | - | 301207  | 301159  |
| Nve-1-451 | NW_001834410.1 | - | 1763358 | 1763310 |
| Nve-1-452 | NW_001834397.1 | + | 742775  | 742823  |
| Nve-1-453 | NW_001833257.1 | + | 23042   | 23090   |
| Nve-1-454 | NW_001834016.1 | + | 382     | 430     |
| Nve-1-455 | NW_001834157.1 | - | 299778  | 299730  |
| Nve-1-456 | NW_001834157.1 | - | 236817  | 236769  |
| Nve-1-457 | NW_001831433.1 | - | 2488    | 2440    |
| Nve-1-458 | NW_001829737.1 | + | 3388    | 3436    |
| Nve-1-459 | NW_001834016.1 | + | 44172   | 44220   |
| Nve-1-460 | NW_001834407.1 | + | 1609098 | 1609146 |

|             |                |   |           |           |
|-------------|----------------|---|-----------|-----------|
| Nve-1-461   | NW_001832900.1 | - | 9836      | 9788      |
| Nve-1-462   | NW_001828601.1 | + | 6068      | 6116      |
| Nve-1-463   | NW_001833889.1 | + | 54718     | 54766     |
| Nve-1-464   | NW_001827890.1 | - | 4602      | 4552      |
| Nve-1-465   | NW_001834036.1 | - | 83720     | 83670     |
| Nve-1-466   | NW_001834354.1 | - | 738521    | 738473    |
| Nve-1-467   | NW_001833951.1 | - | 118666    | 118618    |
| Nve-1-468   | NW_001833985.1 | - | 165627    | 165579    |
| Nve-1-469   | NW_001834027.1 | - | 115594    | 115548    |
| Nve-1-470   | NW_001834406.1 | + | 631305    | 631353    |
| Nve-1-471   | NW_001834153.1 | + | 79252     | 79300     |
| Sma-1-15104 | NW_003037827.1 | + | 371686    | 371753    |
| Sma-1-15105 | NS_000200.1    | + | 62993827  | 62993894  |
| Sma-1-15106 | NW_003037940.1 | + | 240616    | 240664    |
| Sma-1-15107 | NS_000200.1    | + | 183982746 | 183982794 |
| Sma-1-15108 | NW_003037859.1 | + | 806499    | 806547    |
| Sma-1-15109 | NS_000200.1    | + | 103485340 | 103485388 |
| Sma-1-15110 | NW_003037967.1 | - | 177216    | 177168    |
| Sma-1-15111 | NS_000200.1    | - | 199417187 | 199417139 |
| Sma-1-15112 | NW_003037964.1 | - | 499883    | 499835    |
| Sma-1-15113 | NS_000200.1    | - | 198101405 | 198101357 |
| Sma-1-15114 | NW_003035869.1 | - | 93093     | 93044     |
| Sma-1-15115 | NS_000200.1    | - | 335277293 | 335277244 |
| Sma-1-15116 | NW_003038152.1 | - | 167406    | 167359    |
| Sma-1-15117 | NS_000200.1    | - | 292773130 | 292773083 |
| Sma-1-15118 | NW_003037854.1 | + | 1123017   | 1123065   |
| Sma-1-15119 | NS_000200.1    | + | 98027438  | 98027486  |
| Sma-1-15120 | NW_003037977.1 | + | 455964    | 456012    |
| Sma-1-15121 | NS_000200.1    | + | 208741984 | 208742032 |
| Sma-1-15122 | NW_003038083.1 | + | 709359    | 709407    |
| Sma-1-15123 | NS_000200.1    | + | 270952696 | 270952744 |
| Sma-1-15124 | NW_003037966.1 | - | 275383    | 275335    |
| Sma-1-15125 | NS_000200.1    | - | 198977246 | 198977198 |
| Sma-1-15126 | NW_003037889.1 | + | 1511959   | 1512007   |
| Sma-1-15127 | NS_000200.1    | + | 135288449 | 135288497 |
| Sma-1-15128 | NW_003038083.1 | - | 19421     | 19373     |
| Sma-1-15129 | NS_000200.1    | - | 270262758 | 270262710 |
| Sma-1-15130 | NW_003038037.1 | + | 801657    | 801705    |
| Sma-1-15131 | NS_000200.1    | + | 250957066 | 250957114 |
| Sma-1-15132 | NW_003029567.1 | - | 321       | 273       |
| Sma-1-15133 | NW_003037977.1 | + | 941648    | 941696    |
| Sma-1-15134 | NS_000200.1    | + | 209227668 | 209227716 |
| Sma-1-15135 | NS_000200.1    | - | 366168666 | 366168618 |
| Sma-1-15136 | NW_003037937.1 | - | 814752    | 814703    |
| Sma-1-15137 | NS_000200.1    | - | 182014661 | 182014612 |
| Sma-1-15138 | NW_003037851.1 | - | 296220    | 296172    |
| Sma-1-15139 | NS_000200.1    | - | 93699530  | 93699482  |
| Sma-1-15140 | NW_003037807.1 | - | 503999    | 503951    |
| Sma-1-15141 | NS_000200.1    | - | 30765515  | 30765467  |
| Sma-1-15142 | NW_003037865.1 | - | 382918    | 382870    |
| Sma-1-15143 | NS_000200.1    | - | 110804837 | 110804789 |
| Sma-1-15144 | NW_003037834.1 | - | 301195    | 301147    |

|             |                |   |           |           |
|-------------|----------------|---|-----------|-----------|
| Sma-1-15145 | NS_000200.1    | - | 73461681  | 73461633  |
| Sma-1-15146 | NW_003038464.1 | + | 27183     | 27231     |
| Sma-1-15147 | NS_000200.1    | + | 331532450 | 331532498 |
| Sma-1-15148 | NW_003037976.1 | + | 286268    | 286316    |
| Sma-1-15149 | NS_000200.1    | + | 206900583 | 206900631 |
| Sma-1-15150 | NW_003037831.1 | - | 1446545   | 1446497   |
| Sma-1-15151 | NS_000200.1    | - | 70895847  | 70895799  |
| Sma-1-15152 | NW_003038149.1 | + | 78281     | 78331     |
| Sma-1-15153 | NS_000200.1    | + | 291106894 | 291106944 |
| Sma-1-15154 | NW_003037809.1 | - | 1706917   | 1706868   |
| Sma-1-15155 | NS_000200.1    | - | 35371381  | 35371332  |
| Sma-1-15156 | NW_003038135.1 | + | 79770     | 79821     |
| Sma-1-15157 | NS_000200.1    | + | 283952109 | 283952160 |
| Sma-1-15158 | NW_003038143.1 | + | 322332    | 322383    |
| Sma-1-15159 | NS_000200.1    | + | 288081824 | 288081875 |
| Sma-1-15160 | NW_003037814.1 | + | 254288    | 254339    |
| Sma-1-15161 | NS_000200.1    | + | 43238148  | 43238199  |
| Sma-1-15162 | NW_003037981.1 | - | 376137    | 376086    |
| Sma-1-15163 | NS_000200.1    | - | 212774005 | 212773954 |
| Sma-1-15164 | NW_003037859.1 | - | 965351    | 965303    |
| Sma-1-15165 | NS_000200.1    | - | 103644192 | 103644144 |
| Sma-1-15166 | NW_003038002.1 | - | 253434    | 253390    |
| Sma-1-15167 | NS_000200.1    | - | 223373643 | 223373599 |
| Sma-1-15168 | NW_003037874.1 | - | 67762     | 67714     |
| Sma-1-15169 | NS_000200.1    | - | 119492712 | 119492664 |
| Sma-1-15170 | NW_003038456.1 | - | 31934     | 31886     |
| Sma-1-15171 | NS_000200.1    | - | 330902198 | 330902150 |
| Sma-1-15172 | NW_003038252.1 | + | 9637      | 9685      |
| Sma-1-15173 | NS_000200.1    | + | 318865225 | 318865273 |
| Sma-1-15174 | NW_003038020.1 | - | 49930     | 49882     |
| Sma-1-15175 | NS_000200.1    | - | 234017274 | 234017226 |
| Sma-1-15176 | NW_003037907.1 | + | 364600    | 364648    |
| Sma-1-15177 | NS_000200.1    | + | 151769089 | 151769137 |
| Sma-1-15178 | NW_003037915.1 | - | 1233207   | 1233159   |
| Sma-1-15179 | NS_000200.1    | - | 163133193 | 163133145 |
| Sma-1-15180 | NW_003038012.1 | + | 538547    | 538595    |
| Sma-1-15181 | NS_000200.1    | + | 228862486 | 228862534 |
| Sma-1-15182 | NW_003038028.1 | - | 264426    | 264378    |
| Sma-1-15183 | NS_000200.1    | - | 241572000 | 241571952 |
| Sma-1-15184 | NW_003037979.1 | - | 5181      | 5133      |
| Sma-1-15185 | NS_000200.1    | - | 210066201 | 210066153 |
| Sma-1-15186 | NW_003026616.1 | + | 155937    | 155985    |
| Sma-1-15187 | NS_000200.1    | + | 317512536 | 317512584 |
| Sma-1-15188 | NW_003038012.1 | + | 588739    | 588787    |
| Sma-1-15189 | NS_000200.1    | + | 228912678 | 228912726 |
| Sma-1-15190 | NW_003037903.1 | - | 673097    | 673048    |
| Sma-1-15191 | NS_000200.1    | - | 148227178 | 148227129 |
| Sma-1-15192 | NW_003037851.1 | + | 525071    | 525119    |
| Sma-1-15193 | NS_000200.1    | + | 93928381  | 93928429  |
| Sma-1-15194 | NW_003037927.1 | - | 72315     | 72267     |
| Sma-1-15195 | NS_000200.1    | - | 174049678 | 174049630 |
| Sma-1-15196 | NW_003038455.1 | - | 87640     | 87592     |



|             |                |   |           |           |
|-------------|----------------|---|-----------|-----------|
| Sma-1-15197 | NW_003037854.1 | - | 1889558   | 1889510   |
| Sma-1-15198 | NS_000200.1    | - | 330869691 | 330869643 |
| Sma-1-15199 | NS_000200.1    | - | 98793979  | 98793931  |
| Sma-1-15200 | NW_003037887.1 | + | 968965    | 969013    |
| Sma-1-15201 | NS_000200.1    | + | 131432943 | 131432991 |
| Sma-1-15202 | NW_003037971.1 | - | 652131    | 652083    |
| Sma-1-15203 | NS_000200.1    | - | 202274181 | 202274133 |
| Sma-1-15204 | NW_003037831.1 | - | 779774    | 779725    |
| Sma-1-15205 | NS_000200.1    | - | 70229076  | 70229027  |
| Sma-1-15206 | NW_003037946.1 | - | 1023462   | 1023414   |
| Sma-1-15207 | NS_000200.1    | - | 191717322 | 191717274 |
| Sma-1-15208 | NW_003037961.1 | - | 230921    | 230873    |
| Sma-1-15209 | NS_000200.1    | - | 195855163 | 195855115 |
| Sma-1-15210 | NW_003037961.1 | + | 219790    | 219838    |
| Sma-1-15211 | NS_000200.1    | + | 195844032 | 195844080 |
| Sma-1-15212 | NW_003038048.1 | + | 187964    | 188012    |
| Sma-1-15213 | NS_000200.1    | + | 255765795 | 255765843 |
| Sma-1-15214 | NW_003038120.1 | + | 206303    | 206351    |
| Sma-1-15215 | NS_000200.1    | + | 278391526 | 278391574 |
| Sma-1-15216 | NW_003038016.1 | - | 87980     | 87932     |
| Sma-1-15217 | NS_000200.1    | - | 231204517 | 231204469 |
| Sma-1-15218 | NW_003037821.1 | - | 301014    | 300966    |
| Sma-1-15219 | NS_000200.1    | - | 53445498  | 53445450  |
| Sma-1-15220 | NW_003038033.1 | + | 598525    | 598573    |
| Sma-1-15221 | NS_000200.1    | + | 246578527 | 246578575 |
| Sma-1-15222 | NW_003038037.1 | + | 1000620   | 1000668   |
| Sma-1-15223 | NS_000200.1    | + | 251156029 | 251156077 |
| Sma-1-15224 | NW_003020275.1 | + | 597       | 645       |
| Sma-1-15225 | NS_000200.1    | + | 371326588 | 371326636 |
| Sma-1-15226 | NW_003037859.1 | - | 622597    | 622549    |
| Sma-1-15227 | NS_000200.1    | - | 103301438 | 103301390 |
| Sma-1-15228 | NW_003038032.1 | + | 136285    | 136333    |
| Sma-1-15229 | NS_000200.1    | + | 245295445 | 245295493 |
| Sma-1-15230 | NW_003037868.1 | + | 309209    | 309257    |
| Sma-1-15231 | NS_000200.1    | + | 116280921 | 116280969 |
| Sma-1-15232 | NW_003037868.1 | + | 40068     | 40116     |
| Sma-1-15233 | NS_000200.1    | + | 116011780 | 116011828 |
| Sma-1-15234 | NW_003037937.1 | + | 552015    | 552063    |
| Sma-1-15235 | NS_000200.1    | + | 181751924 | 181751972 |
| Sma-1-15236 | NW_003037888.1 | + | 542519    | 542567    |
| Sma-1-15237 | NS_000200.1    | + | 132751011 | 132751059 |
| Sma-1-15238 | NW_003037888.1 | - | 650132    | 650084    |
| Sma-1-15239 | NS_000200.1    | - | 132858624 | 132858576 |
| Sma-1-15240 | NW_003037933.1 | + | 207205    | 207253    |
| Sma-1-15241 | NS_000200.1    | + | 178620377 | 178620425 |
| Sma-1-15242 | NW_003021247.1 | + | 882       | 930       |
| Sma-1-15243 | NS_000200.1    | + | 371690048 | 371690096 |
| Sma-1-15244 | NW_003026510.1 | - | 305505    | 305457    |
| Sma-1-15245 | NS_000200.1    | - | 283745686 | 283745638 |
| Sma-1-15246 | NW_003038261.1 | + | 618661    | 618709    |
| Sma-1-15247 | NS_000200.1    | + | 324232312 | 324232360 |
| Sma-1-15248 | NW_003037830.1 | - | 187349    | 187301    |

|             |                |   |           |           |
|-------------|----------------|---|-----------|-----------|
| Sma-1-15249 | NS.000200.1    | - | 68077720  | 68077672  |
| Sma-1-15250 | NW_003021693.1 | + | 793       | 841       |
| Sma-1-15251 | NS.000200.1    | + | 348316529 | 348316577 |
| Sma-1-15252 | NW_003037937.1 | - | 382621    | 382573    |
| Sma-1-15253 | NS.000200.1    | - | 181582530 | 181582482 |
| Sma-1-15254 | NW_003037943.1 | + | 749856    | 749904    |
| Sma-1-15255 | NS.000200.1    | + | 187771389 | 187771437 |
| Sma-1-15256 | NW_003037813.1 | - | 1024889   | 1024841   |
| Sma-1-15257 | NS.000200.1    | - | 42011752  | 42011704  |
| Sma-1-15258 | NW_003037891.1 | - | 331795    | 331747    |
| Sma-1-15259 | NS.000200.1    | - | 138213073 | 138213025 |
| Sma-1-15260 | NW_003038244.1 | + | 120205    | 120253    |
| Sma-1-15261 | NS.000200.1    | + | 315265410 | 315265458 |
| Sma-1-15262 | NW_003037825.1 | - | 1440401   | 1440353   |
| Sma-1-15263 | NS.000200.1    | - | 60570183  | 60570135  |
| Sma-1-15264 | NW_003037798.1 | - | 1896026   | 1895979   |
| Sma-1-15265 | NS.000200.1    | - | 16155184  | 16155137  |
| Sma-1-15266 | NW_003037859.1 | + | 848435    | 848483    |
| Sma-1-15267 | NS.000200.1    | + | 103527276 | 103527324 |
| Sma-1-15268 | NW_003038028.1 | + | 811525    | 811573    |
| Sma-1-15269 | NS.000200.1    | + | 242119099 | 242119147 |
| Sma-1-15270 | NW_003038502.1 | + | 112809    | 112857    |
| Sma-1-15271 | NS.000200.1    | + | 335111854 | 335111902 |
| Sma-1-15272 | NW_003037807.1 | + | 65560     | 65608     |
| Sma-1-15273 | NS.000200.1    | + | 30327076  | 30327124  |
| Sma-1-15274 | NW_003038118.1 | + | 178058    | 178106    |
| Sma-1-15275 | NS.000200.1    | + | 277742185 | 277742233 |
| Sma-1-15276 | NW_003037905.1 | - | 452982    | 452934    |
| Sma-1-15277 | NS.000200.1    | - | 149721994 | 149721946 |
| Sma-1-15278 | NW_003038505.1 | + | 101837    | 101885    |
| Sma-1-15279 | NS.000200.1    | + | 336181174 | 336181222 |
| Sma-1-15280 | NW_003037913.1 | - | 910496    | 910448    |
| Sma-1-15281 | NS.000200.1    | - | 159474247 | 159474199 |
| Sma-1-15282 | NW_003026505.1 | + | 130135    | 130183    |
| Sma-1-15283 | NS.000200.1    | + | 279383257 | 279383305 |
| Sma-1-15284 | NW_003035671.1 | + | 11080     | 11128     |
| Sma-1-15285 | NS.000200.1    | + | 331644459 | 331644507 |
| Sma-1-15286 | NW_003037786.1 | + | 83377     | 83425     |
| Sma-1-15287 | NS.000200.1    | + | 380176737 | 380176785 |
| Sma-1-15288 | NW_003037851.1 | - | 900375    | 900327    |
| Sma-1-15289 | NS.000200.1    | - | 94303685  | 94303637  |
| Sma-1-15290 | NW_003038518.1 | + | 886590    | 886638    |
| Sma-1-15291 | NS.000200.1    | + | 342523423 | 342523471 |
| Sma-1-15292 | NW_003031186.1 | - | 813       | 765       |
| Sma-1-15293 | NS.000200.1    | - | 325961636 | 325961588 |
| Sma-1-15294 | NW_003037824.1 | + | 443334    | 443382    |
| Sma-1-15295 | NS.000200.1    | + | 57374274  | 57374322  |
| Sma-1-15296 | NW_003037834.1 | - | 1062572   | 1062524   |
| Sma-1-15297 | NS.000200.1    | - | 74223058  | 74223010  |
| Sma-1-15298 | NW_003026460.1 | + | 396455    | 396503    |
| Sma-1-15299 | NS.000200.1    | + | 170918661 | 170918709 |
| Sma-1-15300 | NW_003037844.1 | - | 3211      | 3163      |

|             |                |   |           |           |
|-------------|----------------|---|-----------|-----------|
| Sma-1-15301 | NS_000200.1    | - | 86186657  | 86186609  |
| Sma-1-15302 | NW_003037793.1 | + | 440043    | 440091    |
| Sma-1-15303 | NS_000200.1    | + | 440043    | 440091    |
| Sma-1-15304 | NW_003038225.1 | + | 95861     | 95909     |
| Sma-1-15305 | NS_000200.1    | + | 309950525 | 309950573 |
| Sma-1-15306 | NW_003038069.1 | - | 62191     | 62143     |
| Sma-1-15307 | NS_000200.1    | - | 263905597 | 263905549 |
| Sma-1-15308 | NW_003026619.1 | - | 319496    | 319448    |
| Sma-1-15309 | NS_000200.1    | - | 322510240 | 322510192 |
| Sma-1-15310 | NW_003038022.1 | + | 239680    | 239728    |
| Sma-1-15311 | NS_000200.1    | + | 235920522 | 235920570 |
| Sma-1-15312 | NW_003038229.1 | + | 4075      | 4123      |
| Sma-1-15313 | NS_000200.1    | + | 311121297 | 311121345 |
| Sma-1-15314 | NW_003037909.1 | - | 170586    | 170538    |
| Sma-1-15315 | NS_000200.1    | - | 153712235 | 153712187 |
| Sma-1-15316 | NW_003038071.1 | + | 132667    | 132715    |
| Sma-1-15317 | NS_000200.1    | + | 264935710 | 264935758 |
| Sma-1-15318 | NW_003038254.1 | + | 167496    | 167544    |
| Sma-1-15319 | NS_000200.1    | + | 320203054 | 320203102 |
| Sma-1-15320 | NW_003038152.1 | + | 329257    | 329305    |
| Sma-1-15321 | NS_000200.1    | + | 292934981 | 292935029 |
| Sma-1-15322 | NW_003037816.1 | - | 781185    | 781137    |
| Sma-1-15323 | NS_000200.1    | - | 46990057  | 46990009  |
| Sma-1-15324 | NW_003037802.1 | - | 894290    | 894242    |
| Sma-1-15325 | NS_000200.1    | - | 22897084  | 22897036  |
| Sma-1-15326 | NW_003038473.1 | - | 27944     | 27896     |
| Sma-1-15327 | NW_003038473.1 | - | 6119      | 6071      |
| Sma-1-15328 | NW_003038189.1 | - | 7907      | 7859      |
| Sma-1-15329 | NS_000200.1    | - | 332198229 | 332198181 |
| Sma-1-15330 | NS_000200.1    | - | 332176404 | 332176356 |
| Sma-1-15331 | NS_000200.1    | - | 302345019 | 302344971 |
| Sma-1-15332 | NW_003037847.1 | - | 26585     | 26537     |
| Sma-1-15333 | NS_000200.1    | - | 88678315  | 88678267  |
| Sma-1-15334 | NW_003037967.1 | - | 589528    | 589480    |
| Sma-1-15335 | NS_000200.1    | - | 199829499 | 199829451 |
| Sma-1-15336 | NW_003037859.1 | - | 437181    | 437133    |
| Sma-1-15337 | NS_000200.1    | - | 103116022 | 103115974 |
| Sma-1-15338 | NW_003037932.1 | - | 757839    | 757791    |
| Sma-1-15339 | NS_000200.1    | - | 178291035 | 178290987 |
| Sma-1-15340 | NW_003038024.1 | + | 590121    | 590169    |
| Sma-1-15341 | NS_000200.1    | + | 238487150 | 238487198 |
| Sma-1-15342 | NW_003037846.1 | + | 639027    | 639075    |
| Sma-1-15343 | NS_000200.1    | + | 88273597  | 88273645  |
| Sma-1-15344 | NW_003038073.1 | + | 356799    | 356847    |
| Sma-1-15345 | NS_000200.1    | + | 265879232 | 265879280 |
| Sma-1-15346 | NW_003037846.1 | - | 223240    | 223192    |
| Sma-1-15347 | NS_000200.1    | - | 87857810  | 87857762  |
| Sma-1-15348 | NW_003037932.1 | - | 706626    | 706578    |
| Sma-1-15349 | NS_000200.1    | - | 178239822 | 178239774 |
| Sma-1-15350 | NW_003037964.1 | - | 433707    | 433659    |
| Sma-1-15351 | NS_000200.1    | - | 198035229 | 198035181 |
| Sma-1-15352 | NW_003037844.1 | - | 565637    | 565589    |

|             |                |   |           |           |
|-------------|----------------|---|-----------|-----------|
| Sma-1-15353 | NS_000200.1    | - | 86749083  | 86749035  |
| Sma-1-15354 | NW_003038247.1 | + | 296451    | 296499    |
| Sma-1-15355 | NS_000200.1    | + | 316245179 | 316245227 |
| Sma-1-15356 | NW_003037842.1 | + | 460444    | 460492    |
| Sma-1-15357 | NS_000200.1    | + | 85559634  | 85559682  |
| Sma-1-15358 | NW_003037823.1 | - | 874736    | 874688    |
| Sma-1-15359 | NS_000200.1    | - | 56791355  | 56791307  |
| Sma-1-15360 | NW_003037861.1 | - | 393307    | 393259    |
| Sma-1-15361 | NS_000200.1    | - | 105169761 | 105169713 |
| Sma-1-15362 | NW_003038008.1 | + | 672332    | 672380    |
| Sma-1-15363 | NS_000200.1    | + | 226345428 | 226345476 |
| Sma-1-15364 | NW_003031741.1 | + | 109       | 157       |
| Sma-1-15365 | NS_000200.1    | + | 364302179 | 364302227 |
| Sma-1-15366 | NW_003037810.1 | - | 109986    | 109938    |
| Sma-1-15367 | NS_000200.1    | - | 36714508  | 36714460  |
| Sma-1-15368 | NW_003038147.1 | - | 418977    | 418929    |
| Sma-1-15369 | NS_000200.1    | - | 289946720 | 289946672 |
| Sma-1-15370 | NW_003038079.1 | + | 86204     | 86252     |
| Sma-1-15371 | NS_000200.1    | + | 268216192 | 268216240 |
| Sma-1-15372 | NW_003032034.1 | - | 1084      | 1036      |
| Sma-1-15373 | NS_000200.1    | - | 376900758 | 376900710 |
| Sma-1-15374 | NW_003038030.1 | - | 281892    | 281844    |
| Sma-1-15375 | NS_000200.1    | - | 243417759 | 243417711 |
| Sma-1-15376 | NW_003037882.1 | + | 244922    | 244970    |
| Sma-1-15377 | NS_000200.1    | + | 125536596 | 125536644 |
| Sma-1-15378 | NW_003037822.1 | + | 1527270   | 1527318   |
| Sma-1-15379 | NS_000200.1    | + | 55835276  | 55835324  |
| Sma-1-15380 | NW_003038151.1 | + | 200076    | 200124    |
| Sma-1-15381 | NS_000200.1    | + | 292107319 | 292107367 |
| Sma-1-15382 | NW_003022484.1 | - | 2275      | 2227      |
| Sma-1-15383 | NW_003037977.1 | + | 548208    | 548256    |
| Sma-1-15384 | NW_003037977.1 | - | 547911    | 547863    |
| Sma-1-15385 | NS_000200.1    | + | 208834228 | 208834276 |
| Sma-1-15386 | NS_000200.1    | - | 365023706 | 365023658 |
| Sma-1-15387 | NS_000200.1    | - | 208833931 | 208833883 |
| Sma-1-15388 | NW_003038149.1 | - | 400079    | 400031    |
| Sma-1-15389 | NS_000200.1    | - | 291428692 | 291428644 |
| Sma-1-15390 | NW_003037916.1 | + | 1217062   | 1217111   |
| Sma-1-15391 | NS_000200.1    | + | 164410473 | 164410522 |
| Sma-1-15392 | NW_003037886.1 | - | 221335    | 221287    |
| Sma-1-15393 | NS_000200.1    | - | 129476902 | 129476854 |
| Sma-1-15394 | NW_003037867.1 | + | 130891    | 130939    |
| Sma-1-15395 | NS_000200.1    | + | 115731710 | 115731758 |
| Sma-1-15396 | NW_003038152.1 | - | 43405     | 43357     |
| Sma-1-15397 | NS_000200.1    | - | 292649129 | 292649081 |
| Sma-1-15398 | NW_003037868.1 | - | 215848    | 215800    |
| Sma-1-15399 | NS_000200.1    | - | 116187560 | 116187512 |
| Sma-1-15400 | NW_003021177.1 | - | 1647      | 1599      |
| Sma-1-15401 | NS_000200.1    | - | 371516692 | 371516644 |
| Sma-1-15402 | NW_003037797.1 | + | 518460    | 518508    |
| Sma-1-15403 | NS_000200.1    | + | 10946320  | 10946368  |
| Sma-1-15404 | NW_003037944.1 | - | 531346    | 531298    |

|             |                |   |           |           |
|-------------|----------------|---|-----------|-----------|
| Sma-1-15405 | NS_000200.1    | - | 188752699 | 188752651 |
| Sma-1-15406 | NW_003038448.1 | - | 18645     | 18597     |
| Sma-1-15407 | NW_003038033.1 | + | 224698    | 224746    |
| Sma-1-15408 | NS_000200.1    | + | 246204700 | 246204748 |
| Sma-1-15409 | NS_000200.1    | - | 330395441 | 330395393 |
| Sma-1-15410 | NW_003037804.1 | - | 1174689   | 1174641   |
| Sma-1-15411 | NS_000200.1    | - | 26314709  | 26314661  |
| Sma-1-15412 | NW_003039130.1 | - | 142018    | 141970    |
| Sma-1-15413 | NS_000200.1    | - | 317816629 | 317816581 |
| Sma-1-15414 | NW_003035880.1 | + | 267121    | 267169    |
| Sma-1-15415 | NS_000200.1    | + | 339508185 | 339508233 |
| Sma-1-15416 | NW_003037944.1 | + | 196283    | 196331    |
| Sma-1-15417 | NS_000200.1    | + | 188417636 | 188417684 |
| Sma-1-15418 | NW_003038001.1 | - | 93417     | 93369     |
| Sma-1-15419 | NS_000200.1    | - | 222802978 | 222802930 |
| Sma-1-15420 | NW_003035881.1 | + | 341830    | 341878    |
| Sma-1-15421 | NS_000200.1    | + | 341406035 | 341406083 |
| Sma-1-15422 | NW_003037797.1 | + | 809069    | 809117    |
| Sma-1-15423 | NS_000200.1    | + | 11236929  | 11236977  |
| Sma-1-15424 | NW_003023016.1 | - | 728       | 680       |
| Sma-1-15425 | NS_000200.1    | - | 372063553 | 372063505 |
| Sma-1-15426 | NW_003023151.1 | - | 528       | 480       |
| Sma-1-15427 | NW_003037822.1 | + | 1108847   | 1108895   |
| Sma-1-15428 | NS_000200.1    | + | 55416853  | 55416901  |
| Sma-1-15429 | NS_000200.1    | - | 368382617 | 368382569 |
| Sma-1-15430 | NW_003037830.1 | - | 753208    | 753160    |
| Sma-1-15431 | NS_000200.1    | - | 68643579  | 68643531  |
| Sma-1-15432 | NW_003026469.1 | + | 181105    | 181153    |
| Sma-1-15433 | NS_000200.1    | + | 217802764 | 217802812 |
| Sma-1-15434 | NW_003024303.1 | + | 1395      | 1443      |
| Sma-1-15435 | NS_000200.1    | + | 365477701 | 365477749 |
| Sma-1-15436 | NW_003037878.1 | - | 248837    | 248789    |
| Sma-1-15437 | NS_000200.1    | - | 122302315 | 122302267 |
| Sma-1-15438 | NW_003037940.1 | - | 81044     | 80996     |
| Sma-1-15439 | NS_000200.1    | - | 183823174 | 183823126 |
| Sma-1-15440 | NW_003037774.1 | - | 16136     | 16088     |
| Sma-1-15441 | NS_000200.1    | - | 378601513 | 378601465 |
| Sma-1-15442 | NW_003037917.1 | + | 394268    | 394316    |
| Sma-1-15443 | NS_000200.1    | + | 165431072 | 165431120 |
| Sma-1-15444 | NW_003037940.1 | - | 397407    | 397359    |
| Sma-1-15445 | NS_000200.1    | - | 184139537 | 184139489 |
| Sma-1-15446 | NW_003037928.1 | + | 85163     | 85211     |
| Sma-1-15447 | NS_000200.1    | + | 174409116 | 174409164 |
| Sma-1-15448 | NW_003037988.1 | + | 40534     | 40582     |
| Sma-1-15449 | NS_000200.1    | + | 216034352 | 216034400 |
| Sma-1-15450 | NW_003037800.1 | + | 1067777   | 1067825   |
| Sma-1-15451 | NS_000200.1    | + | 19697137  | 19697185  |
| Sma-1-15452 | NW_003026601.1 | - | 14327     | 14279     |
| Sma-1-15453 | NS_000200.1    | - | 306395936 | 306395888 |
| Sma-1-15454 | NW_003037801.1 | - | 860541    | 860493    |
| Sma-1-15455 | NS_000200.1    | - | 21950021  | 21949973  |
| Sma-1-15456 | NW_003022125.1 | + | 1626      | 1674      |

|             |                |   |           |           |
|-------------|----------------|---|-----------|-----------|
| Sma-1-15457 | NS_000200.1    | + | 360760326 | 360760374 |
| Sma-1-15458 | NW_003037782.1 | - | 179924    | 179876    |
| Sma-1-15459 | NS_000200.1    | - | 379503367 | 379503319 |
| Sma-1-15460 | NW_003024365.1 | + | 395       | 443       |
| Sma-1-15461 | NW_003037846.1 | - | 722512    | 722464    |
| Sma-1-15462 | NW_003037921.1 | - | 194590    | 194542    |
| Sma-1-15463 | NW_003038014.1 | + | 289934    | 289982    |
| Sma-1-15464 | NW_003038027.1 | - | 906429    | 906381    |
| Sma-1-15465 | NW_003038034.1 | + | 863860    | 863908    |
| Sma-1-15466 | NW_003038128.1 | + | 53945     | 53993     |
| Sma-1-15467 | NW_003038128.1 | + | 66104     | 66152     |
| Sma-1-15468 | NS_000200.1    | + | 230030623 | 230030671 |
| Sma-1-15469 | NS_000200.1    | + | 247805616 | 247805664 |
| Sma-1-15470 | NS_000200.1    | + | 280772233 | 280772281 |
| Sma-1-15471 | NS_000200.1    | + | 280784392 | 280784440 |
| Sma-1-15472 | NS_000200.1    | + | 365592588 | 365592636 |
| Sma-1-15473 | NS_000200.1    | - | 241277143 | 241277095 |
| Sma-1-15474 | NS_000200.1    | - | 169724725 | 169724677 |
| Sma-1-15475 | NS_000200.1    | - | 88357082  | 88357034  |
| Sma-1-15476 | NW_003038005.1 | + | 390811    | 390859    |
| Sma-1-15477 | NS_000200.1    | + | 224796765 | 224796813 |
| Sma-1-15478 | NW_003032038.1 | + | 218       | 266       |
| Sma-1-15479 | NW_003038036.1 | + | 421005    | 421053    |
| Sma-1-15480 | NS_000200.1    | + | 249354857 | 249354905 |
| Sma-1-15481 | NS_000200.1    | + | 376922455 | 376922503 |
| Sma-1-15482 | NW_003037937.1 | - | 156465    | 156417    |
| Sma-1-15483 | NS_000200.1    | - | 181356374 | 181356326 |
| Sma-1-15484 | NW_003037800.1 | - | 1561500   | 1561452   |
| Sma-1-15485 | NS_000200.1    | - | 20190860  | 20190812  |
| Sma-1-15486 | NW_003037800.1 | - | 1708861   | 1708813   |
| Sma-1-15487 | NS_000200.1    | - | 20338221  | 20338173  |
| Sma-1-15488 | NW_003037939.1 | + | 857812    | 857860    |
| Sma-1-15489 | NS_000200.1    | + | 183727566 | 183727614 |
| Sma-1-15490 | NW_003037800.1 | + | 20907     | 20955     |
| Sma-1-15491 | NS_000200.1    | + | 18650267  | 18650315  |
| Sma-1-15492 | NW_003037914.1 | + | 1531131   | 1531179   |
| Sma-1-15493 | NS_000200.1    | + | 161675381 | 161675429 |
| Sma-1-15494 | NW_003026464.1 | + | 368271    | 368319    |
| Sma-1-15495 | NS_000200.1    | + | 203668580 | 203668628 |
| Sma-1-15496 | NW_003037807.1 | + | 307720    | 307768    |
| Sma-1-15497 | NS_000200.1    | + | 30569236  | 30569284  |
| Sma-1-15498 | NW_003037814.1 | - | 148889    | 148841    |
| Sma-1-15499 | NS_000200.1    | - | 43132749  | 43132701  |
| Sma-1-15500 | NW_003037937.1 | + | 560803    | 560851    |
| Sma-1-15501 | NW_003037904.1 | + | 301279    | 301327    |
| Sma-1-15502 | NS_000200.1    | + | 149015778 | 149015826 |
| Sma-1-15503 | NS_000200.1    | + | 181760712 | 181760760 |
| Sma-1-15504 | NW_003037797.1 | + | 3000757   | 3000805   |
| Sma-1-15505 | NS_000200.1    | + | 13428617  | 13428665  |
| Sma-1-15506 | NW_003037809.1 | + | 2199131   | 2199179   |
| Sma-1-15507 | NW_003037822.1 | + | 290577    | 290625    |
| Sma-1-15508 | NW_003037829.1 | - | 1019466   | 1019418   |

|             |                |   |           |           |
|-------------|----------------|---|-----------|-----------|
| Sma-1-15509 | NW_003037953.1 | + | 38565     | 38613     |
| Sma-1-15510 | NW_003038482.1 | + | 3242      | 3290      |
| Sma-1-15511 | NS_000200.1    | + | 35863595  | 35863643  |
| Sma-1-15512 | NS_000200.1    | + | 54598583  | 54598631  |
| Sma-1-15513 | NS_000200.1    | + | 192951616 | 192951664 |
| Sma-1-15514 | NS_000200.1    | + | 332980693 | 332980741 |
| Sma-1-15515 | NS_000200.1    | - | 66920004  | 66919956  |
| Sma-1-15516 | NW_003037800.1 | - | 617649    | 617601    |
| Sma-1-15517 | NS_000200.1    | - | 19247009  | 19246961  |
| Sma-1-15518 | NW_003037808.1 | + | 906879    | 906927    |
| Sma-1-15519 | NW_003037953.1 | - | 115522    | 115474    |
| Sma-1-15520 | NS_000200.1    | + | 32693516  | 32693564  |
| Sma-1-15521 | NS_000200.1    | - | 193028573 | 193028525 |
| Sma-1-15522 | NW_003037795.1 | - | 312303    | 312255    |
| Sma-1-15523 | NS_000200.1    | - | 6703186   | 6703138   |
| Sma-1-15524 | NW_003037799.1 | + | 984757    | 984805    |
| Sma-1-15525 | NS_000200.1    | + | 17975111  | 17975159  |
| Sma-1-15526 | NW_003037800.1 | + | 1422932   | 1422980   |
| Sma-1-15527 | NS_000200.1    | + | 20052292  | 20052340  |
| Sma-1-15528 | NW_003037928.1 | + | 867602    | 867650    |
| Sma-1-15529 | NW_003037981.1 | + | 1251143   | 1251191   |
| Sma-1-15530 | NS_000200.1    | + | 175191555 | 175191603 |
| Sma-1-15531 | NS_000200.1    | + | 213649011 | 213649059 |
| Sma-1-15532 | NW_003037825.1 | + | 356306    | 356354    |
| Sma-1-15533 | NW_003038025.1 | - | 524651    | 524603    |
| Sma-1-15534 | NW_003038150.1 | + | 329491    | 329539    |
| Sma-1-15535 | NS_000200.1    | + | 59486088  | 59486136  |
| Sma-1-15536 | NS_000200.1    | + | 291808229 | 291808277 |
| Sma-1-15537 | NS_000200.1    | - | 239382896 | 239382848 |
| Sma-1-15538 | NW_003037874.1 | - | 267876    | 267828    |
| Sma-1-15539 | NS_000200.1    | - | 119692826 | 119692778 |
| Sma-1-15540 | NW_003026472.1 | - | 34830     | 34782     |
| Sma-1-15541 | NS_000200.1    | - | 236446822 | 236446774 |
| Sma-1-15542 | NW_003038032.1 | - | 735281    | 735233    |
| Sma-1-15543 | NS_000200.1    | - | 245894441 | 245894393 |
| Sma-1-15544 | NW_003037788.1 | + | 199857    | 199905    |
| Sma-1-15545 | NS_000200.1    | + | 380647095 | 380647143 |
| Sma-1-15546 | NW_003037795.1 | + | 1347384   | 1347432   |
| Sma-1-15547 | NW_003037849.1 | - | 809742    | 809694    |
| Sma-1-15548 | NS_000200.1    | + | 7738267   | 7738315   |
| Sma-1-15549 | NS_000200.1    | - | 91786015  | 91785967  |
| Sma-1-15550 | NW_003037935.1 | + | 591007    | 591055    |
| Sma-1-15551 | NS_000200.1    | + | 180007542 | 180007590 |
| Sma-1-15552 | NW_003037867.1 | + | 13130     | 13178     |
| Sma-1-15553 | NS_000200.1    | + | 115613949 | 115613997 |
| Sma-1-15554 | NW_003026465.1 | + | 775796    | 775844    |
| Sma-1-15555 | NS_000200.1    | + | 208168390 | 208168438 |
| Sma-1-15556 | NW_003037906.1 | - | 234194    | 234146    |
| Sma-1-15557 | NW_003038030.1 | - | 268082    | 268034    |
| Sma-1-15558 | NS_000200.1    | - | 243403949 | 243403901 |
| Sma-1-15559 | NS_000200.1    | - | 150541973 | 150541925 |
| Sma-1-15560 | NW_003038257.1 | - | 244398    | 244350    |

|             |                |   |           |           |
|-------------|----------------|---|-----------|-----------|
| Sma-1-15561 | NS.000200.1    | - | 321418726 | 321418678 |
| Sma-1-15562 | NW_003029535.1 | - | 99        | 51        |
| Sma-1-15563 | NW_003038514.1 | - | 79753     | 79705     |
| Sma-1-15564 | NW_003026466.1 | + | 63110     | 63158     |
| Sma-1-15565 | NW_003037794.1 | - | 139997    | 139949    |
| Sma-1-15566 | NW_003037862.1 | - | 264176    | 264128    |
| Sma-1-15567 | NW_003037935.1 | + | 578097    | 578145    |
| Sma-1-15568 | NW_003037981.1 | + | 128562    | 128610    |
| Sma-1-15569 | NW_003038034.1 | + | 832067    | 832115    |
| Sma-1-15570 | NW_003038072.1 | + | 79204     | 79252     |
| Sma-1-15571 | NW_003038224.1 | + | 221200    | 221248    |
| Sma-1-15572 | NW_003038152.1 | - | 154121    | 154073    |
| Sma-1-15573 | NS.000200.1    | + | 179994632 | 179994680 |
| Sma-1-15574 | NS.000200.1    | + | 212526430 | 212526478 |
| Sma-1-15575 | NS.000200.1    | + | 215330217 | 215330265 |
| Sma-1-15576 | NS.000200.1    | + | 247773823 | 247773871 |
| Sma-1-15577 | NS.000200.1    | + | 265241432 | 265241480 |
| Sma-1-15578 | NS.000200.1    | + | 309632928 | 309632976 |
| Sma-1-15579 | NS.000200.1    | - | 362227835 | 362227787 |
| Sma-1-15580 | NS.000200.1    | - | 339704292 | 339704244 |
| Sma-1-15581 | NS.000200.1    | - | 292759845 | 292759797 |
| Sma-1-15582 | NS.000200.1    | - | 105915837 | 105915789 |
| Sma-1-15583 | NS.000200.1    | - | 4319592   | 4319544   |
| Sma-1-15584 | NW_003038028.1 | - | 264767    | 264719    |
| Sma-1-15585 | NS.000200.1    | - | 241572341 | 241572293 |
| Sma-1-15586 | NW_003038032.1 | - | 768057    | 768009    |
| Sma-1-15587 | NW_003038117.1 | - | 90276     | 90228     |
| Sma-1-15588 | NS.000200.1    | - | 277408101 | 277408053 |
| Sma-1-15589 | NS.000200.1    | - | 245927217 | 245927169 |
| Sma-1-15590 | NW_003038073.1 | - | 39763     | 39715     |
| Sma-1-15591 | NS.000200.1    | - | 265562196 | 265562148 |
| Sma-1-15592 | NW_003037801.1 | + | 568594    | 568642    |
| Sma-1-15593 | NS.000200.1    | + | 21658074  | 21658122  |
| Sma-1-15594 | NW_003037915.1 | + | 498618    | 498666    |
| Sma-1-15595 | NS.000200.1    | + | 162398604 | 162398652 |
| Sma-1-15596 | NW_003037909.1 | + | 603874    | 603922    |
| Sma-1-15597 | NS.000200.1    | + | 154145523 | 154145571 |
| Sma-1-15598 | NW_003025187.1 | + | 256       | 304       |
| Sma-1-15599 | NW_003037977.1 | - | 589812    | 589764    |
| Sma-1-15600 | NS.000200.1    | + | 361355848 | 361355896 |
| Sma-1-15601 | NS.000200.1    | - | 208875832 | 208875784 |
| Sma-1-15602 | NW_003038143.1 | + | 413127    | 413175    |
| Sma-1-15603 | NS.000200.1    | + | 288172619 | 288172667 |
| Sma-1-15604 | NW_003038261.1 | - | 965956    | 965908    |
| Sma-1-15605 | NS.000200.1    | - | 324579607 | 324579559 |
| Sma-1-15606 | NW_003030815.1 | + | 775       | 823       |
| Sma-1-15607 | NW_003037805.1 | - | 1223386   | 1223338   |
| Sma-1-15608 | NS.000200.1    | + | 370303974 | 370304022 |
| Sma-1-15609 | NS.000200.1    | - | 27781230  | 27781182  |
| Sma-1-15610 | NW_003037786.1 | + | 123890    | 123938    |
| Sma-1-15611 | NS.000200.1    | + | 380217250 | 380217298 |
| Sma-1-15612 | NW_003037810.1 | + | 454571    | 454619    |



|             |                |   |           |           |
|-------------|----------------|---|-----------|-----------|
| Sma-1-15613 | NW_003037810.1 | - | 439308    | 439260    |
| Sma-1-15614 | NW_003037866.1 | + | 1342491   | 1342539   |
| Sma-1-15615 | NW_003037897.1 | + | 289554    | 289602    |
| Sma-1-15616 | NW_003037905.1 | + | 41721     | 41769     |
| Sma-1-15617 | NW_003037909.1 | + | 868196    | 868244    |
| Sma-1-15618 | NW_003037930.1 | + | 817675    | 817723    |
| Sma-1-15619 | NW_003038008.1 | - | 354466    | 354418    |
| Sma-1-15620 | NS_000200.1    | + | 37059093  | 37059141  |
| Sma-1-15621 | NS_000200.1    | + | 112830290 | 112830338 |
| Sma-1-15622 | NS_000200.1    | + | 143771930 | 143771978 |
| Sma-1-15623 | NS_000200.1    | + | 149310733 | 149310781 |
| Sma-1-15624 | NS_000200.1    | + | 154409845 | 154409893 |
| Sma-1-15625 | NS_000200.1    | + | 176675639 | 176675687 |
| Sma-1-15626 | NS_000200.1    | - | 226027562 | 226027514 |
| Sma-1-15627 | NS_000200.1    | - | 37043830  | 37043782  |
| Sma-1-15628 | NW_003037934.1 | + | 194679    | 194727    |
| Sma-1-15629 | NW_003037916.1 | - | 1109503   | 1109455   |
| Sma-1-15630 | NS_000200.1    | + | 179241426 | 179241474 |
| Sma-1-15631 | NS_000200.1    | - | 164302914 | 164302866 |
| Sma-1-15632 | NW_003037794.1 | + | 1081830   | 1081878   |
| Sma-1-15633 | NW_003038172.1 | - | 43972     | 43924     |
| Sma-1-15634 | NS_000200.1    | + | 5261425   | 5261473   |
| Sma-1-15635 | NS_000200.1    | - | 300717487 | 300717439 |
| Sma-1-15636 | NW_003029979.1 | - | 1050      | 1002      |
| Sma-1-15637 | NS_000200.1    | - | 370271236 | 370271188 |
| Sma-1-15638 | NW_003038161.1 | + | 36688     | 36736     |
| Sma-1-15639 | NS_000200.1    | + | 297406539 | 297406587 |
| Sma-1-15640 | NW_003032374.1 | - | 944       | 896       |
| Sma-1-15641 | NW_003037809.1 | + | 46796     | 46844     |
| Sma-1-15642 | NW_003038055.1 | + | 18920     | 18968     |
| Sma-1-15643 | NS_000200.1    | + | 33711260  | 33711308  |
| Sma-1-15644 | NS_000200.1    | + | 258718242 | 258718290 |
| Sma-1-15645 | NS_000200.1    | - | 345973859 | 345973811 |
| Sma-1-15646 | NW_003037820.1 | + | 462318    | 462366    |
| Sma-1-15647 | NW_003037977.1 | - | 600125    | 600077    |
| Sma-1-15648 | NS_000200.1    | + | 52735300  | 52735348  |
| Sma-1-15649 | NS_000200.1    | - | 208886145 | 208886097 |
| Sma-1-15650 | NW_003026464.1 | + | 129482    | 129530    |
| Sma-1-15651 | NS_000200.1    | + | 203429791 | 203429839 |
| Sma-1-15652 | NW_003026458.1 | - | 518916    | 518868    |
| Sma-1-15653 | NS_000200.1    | - | 102387146 | 102387098 |
| Sma-1-15654 | NW_003026458.1 | + | 528458    | 528506    |
| Sma-1-15655 | NS_000200.1    | + | 102396688 | 102396736 |
| Sma-1-15656 | NW_003038457.1 | + | 15251     | 15299     |
| Sma-1-15657 | NS_000200.1    | + | 331097115 | 331097163 |
| Sma-1-15658 | NW_003038034.1 | + | 680496    | 680544    |
| Sma-1-15659 | NS_000200.1    | + | 247622252 | 247622300 |
| Sma-1-15660 | NW_003037880.1 | - | 291665    | 291617    |
| Sma-1-15661 | NS_000200.1    | - | 123975223 | 123975175 |
| Sma-1-15662 | NW_003026616.1 | - | 180994    | 180946    |
| Sma-1-15663 | NW_003037909.1 | - | 544510    | 544462    |
| Sma-1-15664 | NW_003038010.1 | - | 444944    | 444896    |

|             |                |   |           |           |
|-------------|----------------|---|-----------|-----------|
| Sma-1-15665 | NS.000200.1    | - | 317537593 | 317537545 |
| Sma-1-15666 | NS.000200.1    | - | 227263167 | 227263119 |
| Sma-1-15667 | NS.000200.1    | - | 154086159 | 154086111 |
| Sma-1-15668 | NW_003038152.1 | + | 338797    | 338845    |
| Sma-1-15669 | NS.000200.1    | + | 292944521 | 292944569 |
| Sma-1-15670 | NW_003035881.1 | + | 269137    | 269185    |
| Sma-1-15671 | NS.000200.1    | + | 341333342 | 341333390 |
| Sma-1-15672 | NW_003038161.1 | + | 273099    | 273147    |
| Sma-1-15673 | NS.000200.1    | + | 297642950 | 297642998 |
| Sma-1-15674 | NW_003037797.1 | - | 2506232   | 2506184   |
| Sma-1-15675 | NW_003037894.1 | - | 451859    | 451811    |
| Sma-1-15676 | NW_003037943.1 | - | 1151813   | 1151765   |
| Sma-1-15677 | NW_003038020.1 | - | 712889    | 712841    |
| Sma-1-15678 | NW_003026512.1 | - | 275879    | 275831    |
| Sma-1-15679 | NW_003038058.1 | + | 155518    | 155566    |
| Sma-1-15680 | NW_003038058.1 | - | 155300    | 155252    |
| Sma-1-15681 | NS.000200.1    | + | 259986718 | 259986766 |
| Sma-1-15682 | NS.000200.1    | - | 285369919 | 285369871 |
| Sma-1-15683 | NS.000200.1    | - | 259986500 | 259986452 |
| Sma-1-15684 | NS.000200.1    | - | 234680233 | 234680185 |
| Sma-1-15685 | NS.000200.1    | - | 188173346 | 188173298 |
| Sma-1-15686 | NS.000200.1    | - | 142348432 | 142348384 |
| Sma-1-15687 | NS.000200.1    | - | 12934092  | 12934044  |
| Sma-1-15688 | NW_003037885.1 | - | 1102856   | 1102808   |
| Sma-1-15689 | NS.000200.1    | - | 129200803 | 129200755 |
| Sma-1-15690 | NW_003038058.1 | + | 204647    | 204695    |
| Sma-1-15691 | NW_003038058.1 | - | 167470    | 167422    |
| Sma-1-15692 | NS.000200.1    | + | 260035847 | 260035895 |
| Sma-1-15693 | NS.000200.1    | - | 259998670 | 259998622 |
| Sma-1-15694 | NW_003032228.1 | - | 1564      | 1516      |
| Sma-1-15695 | NW_003037818.1 | - | 1106780   | 1106732   |
| Sma-1-15696 | NW_003037946.1 | + | 1039176   | 1039224   |
| Sma-1-15697 | NS.000200.1    | + | 191733036 | 191733084 |
| Sma-1-15698 | NS.000200.1    | - | 357951592 | 357951544 |
| Sma-1-15699 | NS.000200.1    | - | 49822187  | 49822139  |
| Sma-1-15700 | NW_003037915.1 | - | 628843    | 628795    |
| Sma-1-15701 | NS.000200.1    | - | 162528829 | 162528781 |
| Sma-1-15702 | NW_003037796.1 | - | 976349    | 976301    |
| Sma-1-15703 | NS.000200.1    | - | 9185993   | 9185945   |
| Sma-1-15704 | NW_003037796.1 | - | 1493390   | 1493342   |
| Sma-1-15705 | NS.000200.1    | - | 9703034   | 9702986   |
| Sma-1-15706 | NW_003037937.1 | + | 205453    | 205501    |
| Sma-1-15707 | NW_003037831.1 | - | 1389926   | 1389878   |
| Sma-1-15708 | NS.000200.1    | + | 181405362 | 181405410 |
| Sma-1-15709 | NS.000200.1    | - | 70839228  | 70839180  |
| Sma-1-15710 | NW_003037797.1 | + | 2604703   | 2604751   |
| Sma-1-15711 | NS.000200.1    | + | 13032563  | 13032611  |
| Sma-1-15712 | NW_003037977.1 | - | 932488    | 932440    |
| Sma-1-15713 | NS.000200.1    | - | 209218508 | 209218460 |
| Sma-1-15714 | NW_003037866.1 | + | 1116404   | 1116452   |
| Sma-1-15715 | NS.000200.1    | + | 112604203 | 112604251 |
| Sma-1-15716 | NW_003026468.1 | + | 381366    | 381414    |

|             |                |   |           |           |
|-------------|----------------|---|-----------|-----------|
| Sma-1-15717 | NW_003037882.1 | - | 544583    | 544535    |
| Sma-1-15718 | NS_000200.1    | + | 216575387 | 216575435 |
| Sma-1-15719 | NS_000200.1    | - | 125836257 | 125836209 |
| Sma-1-15720 | NW_003037879.1 | - | 550010    | 549962    |
| Sma-1-15721 | NS_000200.1    | - | 123552266 | 123552218 |
| Sma-1-15722 | NW_003026470.1 | + | 540419    | 540467    |
| Sma-1-15723 | NS_000200.1    | + | 219664388 | 219664436 |
| Sma-1-15724 | NW_003037951.1 | + | 15538     | 15586     |
| Sma-1-15725 | NW_003038006.1 | + | 133635    | 133683    |
| Sma-1-15726 | NS_000200.1    | + | 192693263 | 192693311 |
| Sma-1-15727 | NS_000200.1    | + | 225018119 | 225018167 |
| Sma-1-15728 | NW_003034096.1 | + | 1302      | 1350      |
| Sma-1-15729 | NS_000200.1    | + | 363730510 | 363730558 |
| Sma-1-15730 | NW_003034029.1 | - | 4590      | 4542      |
| Sma-1-15731 | NS_000200.1    | - | 363526453 | 363526405 |
| Sma-1-15732 | NW_003038147.1 | - | 386364    | 386316    |
| Sma-1-15733 | NS_000200.1    | - | 289914107 | 289914059 |
| Sma-1-15734 | NW_003037965.1 | - | 35227     | 35179     |
| Sma-1-15735 | NW_003037823.1 | - | 414926    | 414878    |
| Sma-1-15736 | NW_003038163.1 | - | 666383    | 666335    |
| Sma-1-15737 | NS_000200.1    | - | 299066663 | 299066615 |
| Sma-1-15738 | NS_000200.1    | - | 198324312 | 198324264 |
| Sma-1-15739 | NS_000200.1    | - | 56331545  | 56331497  |
| Sma-1-15740 | NW_003037830.1 | + | 977033    | 977081    |
| Sma-1-15741 | NS_000200.1    | + | 68867404  | 68867452  |
| Sma-1-15742 | NW_003038056.1 | + | 42619     | 42667     |
| Sma-1-15743 | NW_003038119.1 | + | 261645    | 261693    |
| Sma-1-15744 | NS_000200.1    | + | 259020270 | 259020318 |
| Sma-1-15745 | NS_000200.1    | + | 278169201 | 278169249 |
| Sma-1-15746 | NW_003037796.1 | - | 760243    | 760195    |
| Sma-1-15747 | NW_003037901.1 | - | 793219    | 793171    |
| Sma-1-15748 | NW_003038518.1 | - | 564478    | 564430    |
| Sma-1-15749 | NS_000200.1    | - | 342201311 | 342201263 |
| Sma-1-15750 | NS_000200.1    | - | 146641680 | 146641632 |
| Sma-1-15751 | NS_000200.1    | - | 8969887   | 8969839   |
| Sma-1-15752 | NW_003038257.1 | + | 121860    | 121908    |
| Sma-1-15753 | NS_000200.1    | + | 321296188 | 321296236 |
| Sma-1-15754 | NW_003026369.1 | - | 1228      | 1180      |
| Sma-1-15755 | NW_003038009.1 | + | 1961      | 2009      |
| Sma-1-15756 | NW_003038009.1 | - | 164552    | 164504    |
| Sma-1-15757 | NW_003038013.1 | + | 245800    | 245848    |
| Sma-1-15758 | NW_003037792.1 | - | 23069     | 23021     |
| Sma-1-15759 | NW_003037804.1 | - | 1356089   | 1356041   |
| Sma-1-15760 | NW_003037810.1 | + | 1274173   | 1274221   |
| Sma-1-15761 | NW_003037824.1 | + | 437048    | 437096    |
| Sma-1-15762 | NW_003037846.1 | + | 824456    | 824504    |
| Sma-1-15763 | NW_003037864.1 | + | 1019924   | 1019972   |
| Sma-1-15764 | NW_003037881.1 | + | 729410    | 729458    |
| Sma-1-15765 | NW_003037899.1 | + | 155031    | 155079    |
| Sma-1-15766 | NW_003037925.1 | + | 182255    | 182303    |
| Sma-1-15767 | NW_003038011.1 | + | 354250    | 354298    |
| Sma-1-15768 | NW_003038143.1 | - | 313239    | 313191    |

|             |                |   |           |           |
|-------------|----------------|---|-----------|-----------|
| Sma-1-15769 | NS_000200.1    | + | 37878695  | 37878743  |
| Sma-1-15770 | NS_000200.1    | + | 57367988  | 57368036  |
| Sma-1-15771 | NS_000200.1    | + | 88459026  | 88459074  |
| Sma-1-15772 | NS_000200.1    | + | 109512498 | 109512546 |
| Sma-1-15773 | NS_000200.1    | + | 125161201 | 125161249 |
| Sma-1-15774 | NS_000200.1    | + | 144674142 | 144674190 |
| Sma-1-15775 | NS_000200.1    | + | 172584258 | 172584306 |
| Sma-1-15776 | NS_000200.1    | + | 226376024 | 226376072 |
| Sma-1-15777 | NS_000200.1    | + | 227881900 | 227881948 |
| Sma-1-15778 | NS_000200.1    | + | 229635426 | 229635474 |
| Sma-1-15779 | NS_000200.1    | - | 382460413 | 382460365 |
| Sma-1-15780 | NS_000200.1    | - | 344836315 | 344836267 |
| Sma-1-15781 | NS_000200.1    | - | 288072731 | 288072683 |
| Sma-1-15782 | NS_000200.1    | - | 226538615 | 226538567 |
| Sma-1-15783 | NS_000200.1    | - | 26496109  | 26496061  |
| Sma-1-15784 | NW_003026472.1 | - | 58981     | 58933     |
| Sma-1-15785 | NS_000200.1    | - | 236470973 | 236470925 |
| Sma-1-15786 | NW_003037837.1 | + | 19253     | 19301     |
| Sma-1-15787 | NW_003038023.1 | - | 207977    | 207929    |
| Sma-1-15788 | NS_000200.1    | + | 76825111  | 76825159  |
| Sma-1-15789 | NS_000200.1    | - | 237368268 | 237368220 |
| Sma-1-15790 | NW_003038021.1 | + | 325575    | 325623    |
| Sma-1-15791 | NS_000200.1    | + | 235154150 | 235154198 |
| Sma-1-15792 | NW_003037833.1 | - | 746728    | 746680    |
| Sma-1-15793 | NS_000200.1    | - | 72937824  | 72937776  |
| Sma-1-15794 | NW_003037793.1 | - | 2778360   | 2778312   |
| Sma-1-15795 | NW_003037813.1 | + | 775533    | 775581    |
| Sma-1-15796 | NW_003037914.1 | - | 1487049   | 1487001   |
| Sma-1-15797 | NS_000200.1    | + | 41762396  | 41762444  |
| Sma-1-15798 | NS_000200.1    | - | 161631299 | 161631251 |
| Sma-1-15799 | NS_000200.1    | - | 2778360   | 2778312   |
| Sma-1-15800 | NW_003037863.1 | - | 1657940   | 1657892   |
| Sma-1-15801 | NS_000200.1    | - | 108416307 | 108416259 |
| Sma-1-15802 | NW_003037866.1 | - | 1116211   | 1116163   |
| Sma-1-15803 | NS_000200.1    | - | 112604010 | 112603962 |
| Sma-1-15804 | NW_003037885.1 | + | 484688    | 484736    |
| Sma-1-15805 | NS_000200.1    | + | 128582635 | 128582683 |
| Sma-1-15806 | NW_003038514.1 | - | 216283    | 216235    |
| Sma-1-15807 | NS_000200.1    | - | 339840822 | 339840774 |
| Sma-1-15808 | NW_003038038.1 | + | 780372    | 780420    |
| Sma-1-15809 | NS_000200.1    | + | 252683765 | 252683813 |
| Sma-1-15810 | NW_003037821.1 | + | 134605    | 134653    |
| Sma-1-15811 | NW_003037830.1 | - | 484336    | 484288    |
| Sma-1-15812 | NW_003039127.1 | - | 2192478   | 2192430   |
| Sma-1-15813 | NS_000200.1    | + | 53279089  | 53279137  |
| Sma-1-15814 | NS_000200.1    | - | 115269977 | 115269929 |
| Sma-1-15815 | NS_000200.1    | - | 68374707  | 68374659  |
| Sma-1-15816 | NW_003037887.1 | - | 37290     | 37242     |
| Sma-1-15817 | NS_000200.1    | - | 130501268 | 130501220 |
| Sma-1-15818 | NW_003038252.1 | - | 5844      | 5796      |
| Sma-1-15819 | NS_000200.1    | - | 318861432 | 318861384 |
| Sma-1-15820 | NW_003037877.1 | + | 479979    | 480027    |

|             |                |   |           |           |
|-------------|----------------|---|-----------|-----------|
| Sma-1-15821 | NS_000200.1    | + | 121518541 | 121518589 |
| Sma-1-15822 | NW_003038369.1 | + | 16123     | 16171     |
| Sma-1-15823 | NS_000200.1    | + | 327125062 | 327125110 |
| Sma-1-15824 | NW_003026624.1 | - | 24768     | 24720     |
| Sma-1-15825 | NS_000200.1    | - | 324894938 | 324894890 |
| Sma-1-15826 | NW_003037869.1 | - | 44741     | 44693     |
| Sma-1-15827 | NS_000200.1    | - | 116517086 | 116517038 |
| Sma-1-15828 | NW_003038444.1 | + | 48005     | 48053     |
| Sma-1-15829 | NS_000200.1    | + | 330122224 | 330122272 |
| Sma-1-15830 | NW_003037883.1 | + | 428860    | 428908    |
| Sma-1-15831 | NS_000200.1    | + | 126492583 | 126492631 |
| Sma-1-15832 | NW_003026612.1 | - | 143626    | 143578    |
| Sma-1-15833 | NW_003037804.1 | - | 1174337   | 1174289   |
| Sma-1-15834 | NW_003037830.1 | - | 432539    | 432491    |
| Sma-1-15835 | NW_003037833.1 | - | 22125     | 22077     |
| Sma-1-15836 | NW_003037912.1 | + | 720880    | 720928    |
| Sma-1-15837 | NW_003037923.1 | - | 639745    | 639697    |
| Sma-1-15838 | NW_003037932.1 | - | 822174    | 822126    |
| Sma-1-15839 | NW_003038038.1 | - | 52695     | 52647     |
| Sma-1-15840 | NW_003038257.1 | + | 191580    | 191628    |
| Sma-1-15841 | NW_003026515.1 | + | 176038    | 176086    |
| Sma-1-15842 | NS_000200.1    | + | 157532455 | 157532503 |
| Sma-1-15843 | NS_000200.1    | + | 290820449 | 290820497 |
| Sma-1-15844 | NS_000200.1    | + | 321365908 | 321365956 |
| Sma-1-15845 | NS_000200.1    | - | 312449013 | 312448965 |
| Sma-1-15846 | NS_000200.1    | - | 251956088 | 251956040 |
| Sma-1-15847 | NS_000200.1    | - | 178355370 | 178355322 |
| Sma-1-15848 | NS_000200.1    | - | 171695958 | 171695910 |
| Sma-1-15849 | NS_000200.1    | - | 72213221  | 72213173  |
| Sma-1-15850 | NS_000200.1    | - | 68322910  | 68322862  |
| Sma-1-15851 | NS_000200.1    | - | 26314357  | 26314309  |
| Sma-1-15852 | NW_003037927.1 | - | 69510     | 69462     |
| Sma-1-15853 | NS_000200.1    | - | 174046873 | 174046825 |
| Sma-1-15854 | NW_003037933.1 | + | 215023    | 215071    |
| Sma-1-15855 | NS_000200.1    | + | 178628195 | 178628243 |
| Sma-1-15856 | NW_003038029.1 | - | 570791    | 570743    |
| Sma-1-15857 | NS_000200.1    | - | 242771692 | 242771644 |
| Sma-1-15858 | NW_003037911.1 | + | 22277     | 22325     |
| Sma-1-15859 | NS_000200.1    | + | 155809630 | 155809678 |
| Sma-1-15860 | NW_003037935.1 | - | 353561    | 353513    |
| Sma-1-15861 | NW_003038161.1 | - | 310237    | 310189    |
| Sma-1-15862 | NW_003038161.1 | - | 302500    | 302452    |
| Sma-1-15863 | NS_000200.1    | - | 297680088 | 297680040 |
| Sma-1-15864 | NS_000200.1    | - | 297672351 | 297672303 |
| Sma-1-15865 | NS_000200.1    | - | 179770096 | 179770048 |
| Sma-1-15866 | NW_003037795.1 | + | 1319868   | 1319916   |
| Sma-1-15867 | NS_000200.1    | + | 7710751   | 7710799   |
| Sma-1-15868 | NW_003038037.1 | - | 986309    | 986261    |
| Sma-1-15869 | NS_000200.1    | - | 251141718 | 251141670 |
| Sma-1-15870 | NW_003038030.1 | - | 594555    | 594507    |
| Sma-1-15871 | NS_000200.1    | - | 243730422 | 243730374 |
| Sma-1-15872 | NW_003037795.1 | + | 1263194   | 1263242   |

|             |                |   |           |           |
|-------------|----------------|---|-----------|-----------|
| Sma-1-15873 | NS_000200.1    | + | 7654077   | 7654125   |
| Sma-1-15874 | NW_003037814.1 | + | 1471184   | 1471232   |
| Sma-1-15875 | NS_000200.1    | + | 44455044  | 44455092  |
| Sma-1-15876 | NW_003038032.1 | + | 565841    | 565889    |
| Sma-1-15877 | NS_000200.1    | + | 245725001 | 245725049 |
| Sma-1-15878 | NW_003037995.1 | - | 362765    | 362717    |
| Sma-1-15879 | NS_000200.1    | - | 220052533 | 220052485 |
| Sma-1-15880 | NW_003037793.1 | + | 2073048   | 2073096   |
| Sma-1-15881 | NS_000200.1    | + | 2073048   | 2073096   |
| Sma-1-15882 | NW_003038077.1 | - | 318161    | 318113    |
| Sma-1-15883 | NS_000200.1    | - | 267089801 | 267089753 |
| Sma-1-15884 | NW_003038261.1 | + | 42989     | 43037     |
| Sma-1-15885 | NS_000200.1    | + | 323656640 | 323656688 |
| Sma-1-15886 | NW_003038260.1 | - | 5558      | 5510      |
| Sma-1-15887 | NS_000200.1    | - | 323177333 | 323177285 |
| Sma-1-15888 | NW_003037941.1 | + | 295751    | 295799    |
| Sma-1-15889 | NS_000200.1    | + | 185030225 | 185030273 |
| Sma-1-15890 | NW_003037944.1 | + | 676662    | 676710    |
| Sma-1-15891 | NS_000200.1    | + | 188898015 | 188898063 |
| Sma-1-15892 | NW_003023212.1 | - | 2326      | 2278      |
| Sma-1-15893 | NW_003038033.1 | - | 221464    | 221416    |
| Sma-1-15894 | NS_000200.1    | - | 368492585 | 368492537 |
| Sma-1-15895 | NS_000200.1    | - | 246201466 | 246201418 |
| Sma-1-15896 | NW_003023538.1 | - | 578       | 530       |
| Sma-1-15897 | NW_003037898.1 | + | 419707    | 419755    |
| Sma-1-15898 | NS_000200.1    | + | 144403529 | 144403577 |
| Sma-1-15899 | NS_000200.1    | - | 373595936 | 373595888 |
| Sma-1-15900 | NW_003037797.1 | - | 3165405   | 3165357   |
| Sma-1-15901 | NS_000200.1    | - | 13593265  | 13593217  |
| Sma-1-15902 | NW_003036206.1 | + | 795       | 843       |
| Sma-1-15903 | NW_003038251.1 | - | 132159    | 132111    |
| Sma-1-15904 | NS_000200.1    | + | 347533648 | 347533696 |
| Sma-1-15905 | NS_000200.1    | - | 318463931 | 318463883 |
| Sma-1-15906 | NW_003037944.1 | - | 565429    | 565381    |
| Sma-1-15907 | NS_000200.1    | - | 188786782 | 188786734 |
| Sma-1-15908 | NW_003037824.1 | + | 989695    | 989743    |
| Sma-1-15909 | NS_000200.1    | + | 57920635  | 57920683  |
| Sma-1-15910 | NW_003026472.1 | + | 328941    | 328989    |
| Sma-1-15911 | NS_000200.1    | + | 236740933 | 236740981 |
| Sma-1-15912 | NW_003037898.1 | + | 447390    | 447438    |
| Sma-1-15913 | NW_003037969.1 | - | 252924    | 252876    |
| Sma-1-15914 | NS_000200.1    | + | 144431212 | 144431260 |
| Sma-1-15915 | NS_000200.1    | - | 200859051 | 200859003 |
| Sma-1-15916 | NW_003038081.1 | + | 245543    | 245591    |
| Sma-1-15917 | NS_000200.1    | + | 269407586 | 269407634 |
| Sma-1-15918 | NW_003038066.1 | - | 251118    | 251070    |
| Sma-1-15919 | NS_000200.1    | - | 262720062 | 262720014 |
| Sma-1-15920 | NW_003038033.1 | - | 959839    | 959791    |
| Sma-1-15921 | NS_000200.1    | - | 246939841 | 246939793 |
| Sma-1-15922 | NW_003026464.1 | - | 387612    | 387564    |
| Sma-1-15923 | NW_003037804.1 | - | 1130492   | 1130444   |
| Sma-1-15924 | NW_003037805.1 | - | 1613408   | 1613360   |

|             |                |   |           |           |
|-------------|----------------|---|-----------|-----------|
| Sma-1-15925 | NW_003037816.1 | - | 562663    | 562615    |
| Sma-1-15926 | NW_003037890.1 | - | 2057427   | 2057379   |
| Sma-1-15927 | NW_003037914.1 | + | 1636125   | 1636173   |
| Sma-1-15928 | NS_000200.1    | + | 161780375 | 161780423 |
| Sma-1-15929 | NS_000200.1    | - | 203687921 | 203687873 |
| Sma-1-15930 | NS_000200.1    | - | 137740788 | 137740740 |
| Sma-1-15931 | NS_000200.1    | - | 46771535  | 46771487  |
| Sma-1-15932 | NS_000200.1    | - | 28171252  | 28171204  |
| Sma-1-15933 | NS_000200.1    | - | 26270512  | 26270464  |
| Sma-1-15934 | NW_003037847.1 | + | 775868    | 775916    |
| Sma-1-15935 | NS_000200.1    | + | 89427598  | 89427646  |
| Sma-1-15936 | NW_003026458.1 | + | 7824      | 7872      |
| Sma-1-15937 | NW_003035881.1 | - | 194505    | 194457    |
| Sma-1-15938 | NS_000200.1    | + | 101876054 | 101876102 |
| Sma-1-15939 | NS_000200.1    | - | 341258710 | 341258662 |
| Sma-1-15940 | NW_003037805.1 | + | 1543595   | 1543643   |
| Sma-1-15941 | NS_000200.1    | + | 28101439  | 28101487  |
| Sma-1-15942 | NW_003038224.1 | + | 121840    | 121888    |
| Sma-1-15943 | NS_000200.1    | + | 309533568 | 309533616 |
| Sma-1-15944 | NW_003037858.1 | + | 84918     | 84966     |
| Sma-1-15945 | NW_003037916.1 | + | 1793649   | 1793697   |
| Sma-1-15946 | NS_000200.1    | + | 100749194 | 100749242 |
| Sma-1-15947 | NS_000200.1    | + | 164987060 | 164987108 |
| Sma-1-15948 | NW_003029782.1 | + | 145       | 193       |
| Sma-1-15949 | NS_000200.1    | + | 375568968 | 375569016 |
| Sma-1-15950 | NW_003037980.1 | + | 1265576   | 1265624   |
| Sma-1-15951 | NS_000200.1    | + | 212226438 | 212226486 |
| Sma-1-15952 | NW_003021785.1 | - | 566       | 518       |
| Sma-1-15953 | NS_000200.1    | - | 351851605 | 351851557 |
| Sma-1-15954 | NW_003037850.1 | + | 164137    | 164185    |
| Sma-1-15955 | NS_000200.1    | + | 92150167  | 92150215  |
| Sma-1-15956 | NW_003038069.1 | - | 128959    | 128911    |
| Sma-1-15957 | NS_000200.1    | - | 263972365 | 263972317 |
| Sma-1-15958 | NW_003038257.1 | + | 245509    | 245557    |
| Sma-1-15959 | NS_000200.1    | + | 321419837 | 321419885 |
| Sma-1-15960 | NW_003037873.1 | + | 169678    | 169726    |
| Sma-1-15961 | NS_000200.1    | + | 118908806 | 118908854 |
| Sma-1-15962 | NW_003021525.1 | + | 199       | 247       |
| Sma-1-15963 | NW_003021525.1 | + | 542       | 590       |
| Sma-1-15964 | NW_003021525.1 | + | 885       | 933       |
| Sma-1-15965 | NW_003021525.1 | + | 1228      | 1276      |
| Sma-1-15966 | NW_003021525.1 | + | 1571      | 1619      |
| Sma-1-15967 | NW_003021785.1 | - | 909       | 861       |
| Sma-1-15968 | NW_003021785.1 | - | 223       | 175       |
| Sma-1-15969 | NW_003024092.1 | - | 971       | 923       |
| Sma-1-15970 | NW_003024092.1 | - | 628       | 580       |
| Sma-1-15971 | NW_003024092.1 | - | 285       | 237       |
| Sma-1-15972 | NW_003025589.1 | - | 604       | 556       |
| Sma-1-15973 | NW_003025589.1 | - | 261       | 213       |
| Sma-1-15974 | NW_003025783.1 | + | 212       | 260       |
| Sma-1-15975 | NW_003025783.1 | + | 555       | 603       |
| Sma-1-15976 | NW_003025783.1 | + | 898       | 946       |

|             |                |   |           |           |
|-------------|----------------|---|-----------|-----------|
| Sma-1-15977 | NW_003030033.1 | + | 292       | 340       |
| Sma-1-15978 | NW_003030033.1 | + | 635       | 683       |
| Sma-1-15979 | NW_003032809.1 | + | 310       | 358       |
| Sma-1-15980 | NW_003032809.1 | + | 653       | 701       |
| Sma-1-15981 | NW_003032809.1 | + | 996       | 1044      |
| Sma-1-15982 | NW_003032809.1 | + | 1339      | 1387      |
| Sma-1-15983 | NW_003037934.1 | + | 230781    | 230829    |
| Sma-1-15984 | NW_003037797.1 | + | 1536134   | 1536182   |
| Sma-1-15985 | NW_003037869.1 | + | 156541    | 156589    |
| Sma-1-15986 | NW_003037911.1 | - | 365939    | 365891    |
| Sma-1-15987 | NW_003037935.1 | - | 286398    | 286350    |
| Sma-1-15988 | NW_003038025.1 | + | 628905    | 628953    |
| Sma-1-15989 | NW_003038238.1 | - | 156544    | 156496    |
| Sma-1-15990 | NW_003038238.1 | - | 156201    | 156153    |
| Sma-1-15991 | NW_003038148.1 | - | 396103    | 396055    |
| Sma-1-15992 | NW_003038152.1 | + | 389026    | 389074    |
| Sma-1-15993 | NS_000200.1    | + | 11963994  | 11964042  |
| Sma-1-15994 | NS_000200.1    | + | 116628886 | 116628934 |
| Sma-1-15995 | NS_000200.1    | + | 179277528 | 179277576 |
| Sma-1-15996 | NS_000200.1    | + | 239487150 | 239487198 |
| Sma-1-15997 | NS_000200.1    | + | 292994750 | 292994798 |
| Sma-1-15998 | NS_000200.1    | + | 348019553 | 348019601 |
| Sma-1-15999 | NS_000200.1    | + | 348019896 | 348019944 |
| Sma-1-16000 | NS_000200.1    | + | 348020239 | 348020287 |
| Sma-1-16001 | NS_000200.1    | + | 348020582 | 348020630 |
| Sma-1-16002 | NS_000200.1    | + | 348020925 | 348020973 |
| Sma-1-16003 | NS_000200.1    | + | 354080865 | 354080913 |
| Sma-1-16004 | NS_000200.1    | + | 354081208 | 354081256 |
| Sma-1-16005 | NS_000200.1    | + | 354081551 | 354081599 |
| Sma-1-16006 | NS_000200.1    | + | 354081894 | 354081942 |
| Sma-1-16007 | NS_000200.1    | + | 356525493 | 356525541 |
| Sma-1-16008 | NS_000200.1    | + | 356525836 | 356525884 |
| Sma-1-16009 | NS_000200.1    | + | 356526179 | 356526227 |
| Sma-1-16010 | NS_000200.1    | + | 357466688 | 357466736 |
| Sma-1-16011 | NS_000200.1    | + | 357467031 | 357467079 |
| Sma-1-16012 | NS_000200.1    | - | 356203815 | 356203767 |
| Sma-1-16013 | NS_000200.1    | - | 356203472 | 356203424 |
| Sma-1-16014 | NS_000200.1    | - | 351851948 | 351851900 |
| Sma-1-16015 | NS_000200.1    | - | 351851262 | 351851214 |
| Sma-1-16016 | NS_000200.1    | - | 348351099 | 348351051 |
| Sma-1-16017 | NS_000200.1    | - | 348350756 | 348350708 |
| Sma-1-16018 | NS_000200.1    | - | 348350413 | 348350365 |
| Sma-1-16019 | NS_000200.1    | - | 313763325 | 313763277 |
| Sma-1-16020 | NS_000200.1    | - | 313762982 | 313762934 |
| Sma-1-16021 | NS_000200.1    | - | 290470087 | 290470039 |
| Sma-1-16022 | NS_000200.1    | - | 179702933 | 179702885 |
| Sma-1-16023 | NS_000200.1    | - | 156153292 | 156153244 |
| Sma-1-16024 | NW_003038261.1 | + | 390544    | 390592    |
| Sma-1-16025 | NS_000200.1    | + | 324004195 | 324004243 |
| Sma-1-16026 | NW_003038537.1 | - | 764       | 716       |
| Sma-1-16027 | NW_003037914.1 | - | 1554290   | 1554242   |
| Sma-1-16028 | NS_000200.1    | - | 343334776 | 343334728 |



|             |                |   |           |           |
|-------------|----------------|---|-----------|-----------|
| Sma-1-16029 | NS_000200.1    | - | 161698540 | 161698492 |
| Sma-1-16030 | NW_003026502.1 | + | 11534     | 11582     |
| Sma-1-16031 | NS_000200.1    | + | 276047970 | 276048018 |
| Sma-1-16032 | NW_003030033.1 | + | 978       | 1026      |
| Sma-1-16033 | NS_000200.1    | + | 357467374 | 357467422 |
| Sma-1-16034 | NW_003037884.1 | - | 924945    | 924897    |
| Sma-1-16035 | NS_000200.1    | - | 127704610 | 127704562 |
| Sma-1-16036 | NW_003038249.1 | - | 160302    | 160254    |
| Sma-1-16037 | NS_000200.1    | - | 316842555 | 316842507 |
| Sma-1-16038 | NW_003037860.1 | + | 85967     | 86015     |
| Sma-1-16039 | NS_000200.1    | + | 103828995 | 103829043 |
| Sma-1-16040 | NW_003038132.1 | + | 196758    | 196806    |
| Sma-1-16041 | NS_000200.1    | + | 282617228 | 282617276 |
| Sma-1-16042 | NW_003037817.1 | + | 305015    | 305063    |
| Sma-1-16043 | NW_003037878.1 | + | 522579    | 522627    |
| Sma-1-16044 | NS_000200.1    | + | 47687367  | 47687415  |
| Sma-1-16045 | NS_000200.1    | + | 122576057 | 122576105 |
| Sma-1-16046 | NW_003037785.1 | + | 94364     | 94412     |
| Sma-1-16047 | NS_000200.1    | + | 379993031 | 379993079 |
| Sma-1-16048 | NW_003037920.1 | - | 224812    | 224764    |
| Sma-1-16049 | NW_003037972.1 | - | 618836    | 618788    |
| Sma-1-16050 | NS_000200.1    | - | 203094540 | 203094492 |
| Sma-1-16051 | NS_000200.1    | - | 169405619 | 169405571 |
| Sma-1-16052 | NW_003038046.1 | + | 113144    | 113192    |
| Sma-1-16053 | NS_000200.1    | + | 255186526 | 255186574 |
| Sma-1-16054 | NW_003023438.1 | - | 4508      | 4460      |
| Sma-1-16055 | NS_000200.1    | - | 373385396 | 373385348 |
| Sma-1-16056 | NW_003037916.1 | + | 1650586   | 1650634   |
| Sma-1-16057 | NS_000200.1    | + | 164843997 | 164844045 |
| Sma-1-16058 | NW_003039131.1 | - | 21978     | 21930     |
| Sma-1-16059 | NS_000200.1    | - | 328978883 | 328978835 |
| Sma-1-16060 | NW_003038034.1 | - | 831872    | 831824    |
| Sma-1-16061 | NS_000200.1    | - | 247773628 | 247773580 |
| Sma-1-16062 | NW_003038464.1 | + | 26318     | 26366     |
| Sma-1-16063 | NS_000200.1    | + | 331531585 | 331531633 |
| Sma-1-16064 | NW_003038010.1 | - | 335866    | 335816    |
| Sma-1-16065 | NS_000200.1    | - | 227154089 | 227154039 |
| Sma-1-16066 | NW_003037794.1 | + | 887824    | 887872    |
| Sma-1-16067 | NS_000200.1    | + | 5067419   | 5067467   |
| Sma-1-16068 | NW_003038038.1 | + | 582674    | 582722    |
| Sma-1-16069 | NS_000200.1    | + | 252486067 | 252486115 |
| Sma-1-16070 | NW_003038482.1 | + | 3584      | 3632      |
| Sma-1-16071 | NS_000200.1    | + | 332981035 | 332981083 |
| Sma-1-16072 | NW_003026609.1 | - | 37085     | 37037     |
| Sma-1-16073 | NS_000200.1    | - | 309692077 | 309692029 |
| Sma-1-16074 | NW_003037818.1 | + | 2278074   | 2278122   |
| Sma-1-16075 | NS_000200.1    | + | 50993481  | 50993529  |
| Sma-1-16076 | NW_003036430.1 | - | 1539      | 1491      |
| Sma-1-16077 | NS_000200.1    | - | 359969226 | 359969178 |
| Sma-1-16078 | NW_003035869.1 | + | 164409    | 164457    |
| Sma-1-16079 | NS_000200.1    | + | 335348609 | 335348657 |
| Sma-1-16080 | NW_003038081.1 | - | 331223    | 331175    |

|             |                |   |           |           |
|-------------|----------------|---|-----------|-----------|
| Sma-1-16081 | NS_000200.1    | - | 269493266 | 269493218 |
| Sma-1-16082 | NW_003038155.1 | - | 438905    | 438857    |
| Sma-1-16083 | NS_000200.1    | - | 294562023 | 294561975 |
| Sma-1-16084 | NW_003038286.1 | + | 1611      | 1659      |
| Sma-1-16085 | NW_003037885.1 | + | 1061954   | 1062002   |
| Sma-1-16086 | NS_000200.1    | + | 129159901 | 129159949 |
| Sma-1-16087 | NS_000200.1    | + | 325349480 | 325349528 |
| Sma-1-16088 | NW_003037818.1 | + | 914247    | 914295    |
| Sma-1-16089 | NS_000200.1    | + | 49629654  | 49629702  |
| Sma-1-16090 | NW_003035877.1 | - | 27746     | 27698     |
| Sma-1-16091 | NS_000200.1    | - | 337008280 | 337008232 |
| Sma-1-16092 | NW_003037944.1 | + | 674220    | 674268    |
| Sma-1-16093 | NS_000200.1    | + | 188895573 | 188895621 |
| Sma-1-16094 | NW_003035829.1 | - | 1048      | 1000      |
| Sma-1-16095 | NS_000200.1    | - | 364179514 | 364179466 |
| Sma-1-16096 | NW_003037911.1 | - | 981809    | 981761    |
| Sma-1-16097 | NW_003038518.1 | - | 323564    | 323516    |
| Sma-1-16098 | NS_000200.1    | - | 341960397 | 341960349 |
| Sma-1-16099 | NS_000200.1    | - | 156769162 | 156769114 |
| Sma-1-16100 | NW_003037824.1 | - | 973243    | 973195    |
| Sma-1-16101 | NW_003037930.1 | + | 626482    | 626530    |
| Sma-1-16102 | NS_000200.1    | + | 176484446 | 176484494 |
| Sma-1-16103 | NS_000200.1    | - | 57904183  | 57904135  |
| Sma-1-16104 | NW_003038163.1 | + | 681655    | 681703    |
| Sma-1-16105 | NS_000200.1    | + | 299081935 | 299081983 |
| Sma-1-16106 | NW_003037803.1 | + | 1328082   | 1328130   |
| Sma-1-16107 | NW_003037812.1 | - | 1406484   | 1406436   |
| Sma-1-16108 | NW_003037822.1 | + | 55198     | 55246     |
| Sma-1-16109 | NW_003037822.1 | - | 812302    | 812254    |
| Sma-1-16110 | NW_003038038.1 | - | 1170713   | 1170665   |
| Sma-1-16111 | NS_000200.1    | + | 24828619  | 24828667  |
| Sma-1-16112 | NS_000200.1    | + | 54363204  | 54363252  |
| Sma-1-16113 | NS_000200.1    | - | 253074106 | 253074058 |
| Sma-1-16114 | NS_000200.1    | - | 55120308  | 55120260  |
| Sma-1-16115 | NS_000200.1    | - | 40889223  | 40889175  |
| Sma-1-16116 | NW_003037864.1 | + | 531314    | 531362    |
| Sma-1-16117 | NS_000200.1    | + | 109023888 | 109023936 |
| Sma-1-16118 | NW_003038514.1 | + | 99281     | 99329     |
| Sma-1-16119 | NW_003037824.1 | - | 807554    | 807506    |
| Sma-1-16120 | NW_003037895.1 | + | 89607     | 89655     |
| Sma-1-16121 | NS_000200.1    | + | 142535809 | 142535857 |
| Sma-1-16122 | NS_000200.1    | + | 339723820 | 339723868 |
| Sma-1-16123 | NS_000200.1    | - | 57738494  | 57738446  |
| Sma-1-16124 | NW_003037823.1 | - | 960416    | 960368    |
| Sma-1-16125 | NW_003037832.1 | + | 749387    | 749435    |
| Sma-1-16126 | NW_003037832.1 | - | 782775    | 782727    |
| Sma-1-16127 | NW_003037906.1 | - | 745622    | 745574    |
| Sma-1-16128 | NW_003037975.1 | - | 678958    | 678910    |
| Sma-1-16129 | NS_000200.1    | + | 71958818  | 71958866  |
| Sma-1-16130 | NS_000200.1    | - | 206261182 | 206261134 |
| Sma-1-16131 | NS_000200.1    | - | 151053401 | 151053353 |
| Sma-1-16132 | NS_000200.1    | - | 71992206  | 71992158  |

|             |                |   |           |           |
|-------------|----------------|---|-----------|-----------|
| Sma-1-16133 | NS_000200.1    | - | 56877035  | 56876987  |
| Sma-1-16134 | NW_003037793.1 | - | 3347351   | 3347303   |
| Sma-1-16135 | NW_003037915.1 | - | 946758    | 946710    |
| Sma-1-16136 | NW_003038071.1 | - | 132620    | 132572    |
| Sma-1-16137 | NW_003038147.1 | + | 98143     | 98191     |
| Sma-1-16138 | NS_000200.1    | + | 289625886 | 289625934 |
| Sma-1-16139 | NS_000200.1    | - | 264935663 | 264935615 |
| Sma-1-16140 | NS_000200.1    | - | 162846744 | 162846696 |
| Sma-1-16141 | NS_000200.1    | - | 3347351   | 3347303   |
| Sma-1-16142 | NW_003026485.1 | - | 162234    | 162185    |
| Sma-1-16143 | NS_000200.1    | - | 258517139 | 258517090 |
| Sma-1-16144 | NW_003038072.1 | + | 51165     | 51213     |
| Sma-1-16145 | NW_003038120.1 | - | 20042     | 19994     |
| Sma-1-16146 | NS_000200.1    | + | 265213393 | 265213441 |
| Sma-1-16147 | NS_000200.1    | - | 278205265 | 278205217 |
| Sma-1-16148 | NW_003037991.1 | + | 315173    | 315221    |
| Sma-1-16149 | NS_000200.1    | + | 217464741 | 217464789 |
| Sma-1-16150 | NW_003037859.1 | + | 9985      | 10033     |
| Sma-1-16151 | NW_003037908.1 | + | 901826    | 901874    |
| Sma-1-16152 | NS_000200.1    | + | 102688826 | 102688874 |
| Sma-1-16153 | NS_000200.1    | + | 153374957 | 153375005 |
| Sma-1-16154 | NW_003038033.1 | - | 635362    | 635314    |
| Sma-1-16155 | NS_000200.1    | - | 246615364 | 246615316 |
| Sma-1-16156 | NW_003037978.1 | - | 23371     | 23323     |
| Sma-1-16157 | NS_000200.1    | - | 209291381 | 209291333 |
| Sma-1-16158 | NW_003031870.1 | + | 76        | 124       |
| Sma-1-16159 | NS_000200.1    | + | 367181565 | 367181613 |
| Sma-1-16160 | NW_003036157.1 | + | 91        | 139       |
| Sma-1-16161 | NW_003037809.1 | + | 947358    | 947406    |
| Sma-1-16162 | NW_003037813.1 | - | 328542    | 328494    |
| Sma-1-16163 | NW_003037824.1 | + | 300284    | 300332    |
| Sma-1-16164 | NW_003037839.1 | - | 1240227   | 1240179   |
| Sma-1-16165 | NW_003037866.1 | + | 1332210   | 1332258   |
| Sma-1-16166 | NW_003037906.1 | + | 6030      | 6078      |
| Sma-1-16167 | NW_003037933.1 | - | 269235    | 269187    |
| Sma-1-16168 | NW_003038255.1 | + | 23390     | 23438     |
| Sma-1-16169 | NS_000200.1    | + | 34611822  | 34611870  |
| Sma-1-16170 | NS_000200.1    | + | 57231224  | 57231272  |
| Sma-1-16171 | NS_000200.1    | + | 112820009 | 112820057 |
| Sma-1-16172 | NS_000200.1    | + | 150313809 | 150313857 |
| Sma-1-16173 | NS_000200.1    | + | 320412535 | 320412583 |
| Sma-1-16174 | NS_000200.1    | + | 347377277 | 347377325 |
| Sma-1-16175 | NS_000200.1    | - | 178682407 | 178682359 |
| Sma-1-16176 | NS_000200.1    | - | 80198377  | 80198329  |
| Sma-1-16177 | NS_000200.1    | - | 41315405  | 41315357  |
| Sma-1-16178 | NW_003038034.1 | - | 875187    | 875139    |
| Sma-1-16179 | NS_000200.1    | - | 247816943 | 247816895 |
| Sma-1-16180 | NW_003030133.1 | - | 962       | 914       |
| Sma-1-16181 | NW_003038081.1 | - | 108626    | 108578    |
| Sma-1-16182 | NS_000200.1    | - | 357657450 | 357657402 |
| Sma-1-16183 | NS_000200.1    | - | 269270669 | 269270621 |
| Sma-1-16184 | NW_003037831.1 | - | 1215409   | 1215361   |

|             |                |   |           |           |
|-------------|----------------|---|-----------|-----------|
| Sma-1-16185 | NS_000200.1    | - | 70664711  | 70664663  |
| Sma-1-16186 | NW_003037875.1 | + | 414845    | 414893    |
| Sma-1-16187 | NS_000200.1    | + | 120443514 | 120443562 |
| Sma-1-16188 | NW_003032263.1 | + | 5793      | 5841      |
| Sma-1-16189 | NW_003037795.1 | - | 683120    | 683072    |
| Sma-1-16190 | NW_003037809.1 | - | 2767100   | 2767052   |
| Sma-1-16191 | NW_003037819.1 | + | 496324    | 496372    |
| Sma-1-16192 | NW_003037866.1 | + | 649703    | 649751    |
| Sma-1-16193 | NW_003037885.1 | - | 731333    | 731285    |
| Sma-1-16194 | NW_003037901.1 | - | 677637    | 677589    |
| Sma-1-16195 | NW_003038042.1 | + | 67388     | 67436     |
| Sma-1-16196 | NS_000200.1    | + | 51584589  | 51584637  |
| Sma-1-16197 | NS_000200.1    | + | 112137502 | 112137550 |
| Sma-1-16198 | NS_000200.1    | + | 254012987 | 254013035 |
| Sma-1-16199 | NS_000200.1    | + | 358085143 | 358085191 |
| Sma-1-16200 | NS_000200.1    | - | 146526098 | 146526050 |
| Sma-1-16201 | NS_000200.1    | - | 128829280 | 128829232 |
| Sma-1-16202 | NS_000200.1    | - | 36431564  | 36431516  |
| Sma-1-16203 | NS_000200.1    | - | 7074003   | 7073955   |
| Sma-1-16204 | NW_003037958.1 | - | 133909    | 133861    |
| Sma-1-16205 | NS_000200.1    | - | 194798093 | 194798045 |
| Sma-1-16206 | NW_003031283.1 | + | 1095      | 1143      |
| Sma-1-16207 | NS_000200.1    | + | 345667183 | 345667231 |
| Sma-1-16208 | NW_003037859.1 | + | 140135    | 140183    |
| Sma-1-16209 | NW_003037859.1 | - | 139838    | 139790    |
| Sma-1-16210 | NS_000200.1    | + | 102818976 | 102819024 |
| Sma-1-16211 | NS_000200.1    | - | 102818679 | 102818631 |
| Sma-1-16212 | NW_003037938.1 | - | 566072    | 566024    |
| Sma-1-16213 | NS_000200.1    | - | 182603185 | 182603137 |
| Sma-1-16214 | NW_003037822.1 | + | 268609    | 268657    |
| Sma-1-16215 | NS_000200.1    | + | 54576615  | 54576663  |
| Sma-1-16216 | NW_003037853.1 | + | 683427    | 683475    |
| Sma-1-16217 | NS_000200.1    | + | 96175478  | 96175526  |
| Sma-1-16218 | NW_003021503.1 | - | 692       | 644       |
| Sma-1-16219 | NW_003035880.1 | - | 18935     | 18887     |
| Sma-1-16220 | NS_000200.1    | - | 344188827 | 344188779 |
| Sma-1-16221 | NS_000200.1    | - | 339259999 | 339259951 |
| Sma-1-16222 | NW_003031400.1 | + | 702       | 750       |
| Sma-1-16223 | NW_003038084.1 | + | 373007    | 373055    |
| Sma-1-16224 | NS_000200.1    | + | 271388251 | 271388299 |
| Sma-1-16225 | NS_000200.1    | + | 349903991 | 349904039 |
| Sma-1-16226 | NW_003031022.1 | + | 1350      | 1398      |
| Sma-1-16227 | NS_000200.1    | + | 325539197 | 325539245 |
| Sma-1-16228 | NW_003038257.1 | - | 191248    | 191200    |
| Sma-1-16229 | NS_000200.1    | - | 321365576 | 321365528 |
| Sma-1-16230 | NW_003037795.1 | + | 276262    | 276310    |
| Sma-1-16231 | NW_003037795.1 | + | 286014    | 286062    |
| Sma-1-16232 | NS_000200.1    | + | 6667145   | 6667193   |
| Sma-1-16233 | NS_000200.1    | + | 6676897   | 6676945   |
| Sma-1-16234 | NW_003037909.1 | - | 597950    | 597902    |
| Sma-1-16235 | NS_000200.1    | - | 154139599 | 154139551 |
| Sma-1-16236 | NW_003026618.1 | + | 367355    | 367403    |

|             |                |   |           |           |
|-------------|----------------|---|-----------|-----------|
| Sma-1-16237 | NS_000200.1    | + | 322122357 | 322122405 |
| Sma-1-16238 | NW_003037833.1 | - | 736607    | 736559    |
| Sma-1-16239 | NS_000200.1    | - | 72927703  | 72927655  |
| Sma-1-16240 | NW_003037924.1 | + | 26362     | 26410     |
| Sma-1-16241 | NW_003037945.1 | - | 882297    | 882249    |
| Sma-1-16242 | NW_003038020.1 | + | 226952    | 227000    |
| Sma-1-16243 | NS_000200.1    | + | 171733320 | 171733368 |
| Sma-1-16244 | NS_000200.1    | + | 234194296 | 234194344 |
| Sma-1-16245 | NS_000200.1    | - | 189984261 | 189984213 |
| Sma-1-16246 | NW_003037972.1 | - | 148422    | 148374    |
| Sma-1-16247 | NS_000200.1    | - | 202624126 | 202624078 |
| Sma-1-16248 | NW_003037826.1 | + | 137718    | 137766    |
| Sma-1-16249 | NS_000200.1    | + | 61137234  | 61137282  |
| Sma-1-16250 | NW_003038131.1 | + | 145677    | 145725    |
| Sma-1-16251 | NS_000200.1    | + | 282107521 | 282107569 |
| Sma-1-16252 | NW_003026606.1 | - | 149342    | 149294    |
| Sma-1-16253 | NW_003037911.1 | - | 451611    | 451563    |
| Sma-1-16254 | NW_003037971.1 | + | 530011    | 530059    |
| Sma-1-16255 | NW_003038024.1 | + | 729926    | 729974    |
| Sma-1-16256 | NS_000200.1    | + | 202152061 | 202152109 |
| Sma-1-16257 | NS_000200.1    | + | 238626955 | 238627003 |
| Sma-1-16258 | NS_000200.1    | - | 308005035 | 308004987 |
| Sma-1-16259 | NS_000200.1    | - | 156238964 | 156238916 |
| Sma-1-16260 | NW_003037901.1 | - | 855680    | 855632    |
| Sma-1-16261 | NS_000200.1    | - | 146704141 | 146704093 |
| Sma-1-16262 | NW_003037904.1 | - | 118228    | 118180    |
| Sma-1-16263 | NW_003038037.1 | + | 543157    | 543205    |
| Sma-1-16264 | NS_000200.1    | + | 250698566 | 250698614 |
| Sma-1-16265 | NS_000200.1    | - | 148832727 | 148832679 |
| Sma-1-16266 | NW_003037979.1 | + | 132689    | 132737    |
| Sma-1-16267 | NS_000200.1    | + | 210193709 | 210193757 |
| Sma-1-16268 | NW_003037905.1 | + | 49748     | 49796     |
| Sma-1-16269 | NS_000200.1    | + | 149318760 | 149318808 |
| Sma-1-16270 | NW_003037831.1 | - | 1067067   | 1067019   |
| Sma-1-16271 | NS_000200.1    | - | 70516369  | 70516321  |
| Sma-1-16272 | NW_003037980.1 | - | 493605    | 493557    |
| Sma-1-16273 | NS_000200.1    | - | 211454467 | 211454419 |
| Sma-1-16274 | NW_003038005.1 | + | 157697    | 157745    |
| Sma-1-16275 | NS_000200.1    | + | 224563651 | 224563699 |
| Sma-1-16276 | NW_003022852.1 | - | 939       | 891       |
| Sma-1-16277 | NW_003037934.1 | - | 230415    | 230367    |
| Sma-1-16278 | NW_003037800.1 | - | 2407465   | 2407417   |
| Sma-1-16279 | NW_003037914.1 | - | 330914    | 330866    |
| Sma-1-16280 | NS_000200.1    | - | 368212625 | 368212577 |
| Sma-1-16281 | NS_000200.1    | - | 179277162 | 179277114 |
| Sma-1-16282 | NS_000200.1    | - | 160475164 | 160475116 |
| Sma-1-16283 | NS_000200.1    | - | 21036825  | 21036777  |
| Sma-1-16284 | NW_003037831.1 | + | 416076    | 416124    |
| Sma-1-16285 | NS_000200.1    | + | 69865378  | 69865426  |
| Sma-1-16286 | NW_003037885.1 | + | 337939    | 337987    |
| Sma-1-16287 | NS_000200.1    | + | 128435886 | 128435934 |
| Sma-1-16288 | NW_003037896.1 | - | 127231    | 127183    |

|             |                |   |           |           |
|-------------|----------------|---|-----------|-----------|
| Sma-1-16289 | NS_000200.1    | - | 143047654 | 143047606 |
| Sma-1-16290 | NW_003026458.1 | - | 410335    | 410287    |
| Sma-1-16291 | NW_003037796.1 | + | 1064110   | 1064158   |
| Sma-1-16292 | NW_003038143.1 | + | 253533    | 253581    |
| Sma-1-16293 | NS_000200.1    | + | 9273754   | 9273802   |
| Sma-1-16294 | NS_000200.1    | + | 288013025 | 288013073 |
| Sma-1-16295 | NS_000200.1    | - | 102278565 | 102278517 |
| Sma-1-16296 | NW_003026283.1 | + | 360       | 408       |
| Sma-1-16297 | NS_000200.1    | + | 344667869 | 344667917 |
| Sma-1-16298 | NW_003037886.1 | - | 411838    | 411790    |
| Sma-1-16299 | NS_000200.1    | - | 129667405 | 129667357 |
| Sma-1-16300 | NW_003038261.1 | - | 458395    | 458347    |
| Sma-1-16301 | NW_003026490.1 | + | 69766     | 69814     |
| Sma-1-16302 | NS_000200.1    | + | 267701482 | 267701530 |
| Sma-1-16303 | NS_000200.1    | - | 324072046 | 324071998 |
| Sma-1-16304 | NW_003026609.1 | - | 152821    | 152773    |
| Sma-1-16305 | NW_003037807.1 | - | 322256    | 322208    |
| Sma-1-16306 | NW_003037814.1 | - | 281635    | 281587    |
| Sma-1-16307 | NW_003037816.1 | + | 562864    | 562912    |
| Sma-1-16308 | NW_003037838.1 | - | 277769    | 277721    |
| Sma-1-16309 | NW_003037839.1 | + | 804345    | 804393    |
| Sma-1-16310 | NW_003037964.1 | - | 181253    | 181205    |
| Sma-1-16311 | NW_003038037.1 | + | 537157    | 537205    |
| Sma-1-16312 | NW_003038037.1 | - | 536860    | 536812    |
| Sma-1-16313 | NW_003038069.1 | + | 57346     | 57394     |
| Sma-1-16314 | NW_003038224.1 | + | 41129     | 41177     |
| Sma-1-16315 | NW_003038065.1 | + | 193285    | 193333    |
| Sma-1-16316 | NS_000200.1    | + | 46771736  | 46771784  |
| Sma-1-16317 | NS_000200.1    | + | 79762495  | 79762543  |
| Sma-1-16318 | NS_000200.1    | + | 250692566 | 250692614 |
| Sma-1-16319 | NS_000200.1    | + | 262344902 | 262344950 |
| Sma-1-16320 | NS_000200.1    | + | 263900752 | 263900800 |
| Sma-1-16321 | NS_000200.1    | + | 309452857 | 309452905 |
| Sma-1-16322 | NS_000200.1    | - | 309807813 | 309807765 |
| Sma-1-16323 | NS_000200.1    | - | 250692269 | 250692221 |
| Sma-1-16324 | NS_000200.1    | - | 197782775 | 197782727 |
| Sma-1-16325 | NS_000200.1    | - | 78276332  | 78276284  |
| Sma-1-16326 | NS_000200.1    | - | 43265495  | 43265447  |
| Sma-1-16327 | NS_000200.1    | - | 30583772  | 30583724  |
| Sma-1-16328 | NW_003038152.1 | + | 109040    | 109088    |
| Sma-1-16329 | NS_000200.1    | + | 292714764 | 292714812 |
| Sma-1-16330 | NW_003037795.1 | - | 944082    | 944034    |
| Sma-1-16331 | NW_003038257.1 | + | 99479     | 99527     |
| Sma-1-16332 | NS_000200.1    | + | 321273807 | 321273855 |
| Sma-1-16333 | NS_000200.1    | - | 7334965   | 7334917   |
| Sma-1-16334 | NW_003025589.1 | - | 951       | 902       |
| Sma-1-16335 | NS_000200.1    | - | 356204162 | 356204113 |
| Sma-1-16336 | NW_003037858.1 | - | 365646    | 365598    |
| Sma-1-16337 | NW_003037886.1 | + | 535916    | 535964    |
| Sma-1-16338 | NS_000200.1    | + | 129791483 | 129791531 |
| Sma-1-16339 | NS_000200.1    | - | 101029922 | 101029874 |
| Sma-1-16340 | NW_003039022.1 | - | 1441      | 1393      |

|             |                |   |           |           |
|-------------|----------------|---|-----------|-----------|
| Sma-1-16341 | NW_003037978.1 | + | 488883    | 488931    |
| Sma-1-16342 | NS_000200.1    | + | 209756893 | 209756941 |
| Sma-1-16343 | NS_000200.1    | - | 358644946 | 358644898 |
| Sma-1-16344 | NW_003037856.1 | - | 354083    | 354035    |
| Sma-1-16345 | NS_000200.1    | - | 99712039  | 99711991  |
| Sma-1-16346 | NW_003037792.1 | - | 56822     | 56774     |
| Sma-1-16347 | NS_000200.1    | - | 382494166 | 382494118 |
| Sma-1-16348 | NW_003037853.1 | + | 143260    | 143308    |
| Sma-1-16349 | NW_003037910.1 | + | 28632     | 28680     |
| Sma-1-16350 | NS_000200.1    | + | 95635311  | 95635359  |
| Sma-1-16351 | NS_000200.1    | + | 154540607 | 154540655 |
| Sma-1-16352 | NW_003038018.1 | + | 655939    | 655987    |
| Sma-1-16353 | NS_000200.1    | + | 233056789 | 233056837 |
| Sma-1-16354 | NW_003037864.1 | - | 537624    | 537576    |
| Sma-1-16355 | NS_000200.1    | - | 109030198 | 109030150 |
| Sma-1-16356 | NW_003038259.1 | + | 32150     | 32198     |
| Sma-1-16357 | NS_000200.1    | + | 322892749 | 322892797 |
| Sma-1-16358 | NW_003038034.1 | + | 703190    | 703238    |
| Sma-1-16359 | NS_000200.1    | + | 247644946 | 247644994 |
| Sma-1-16360 | NW_003021503.1 | - | 361       | 313       |
| Sma-1-16361 | NW_003035880.1 | - | 18603     | 18555     |
| Sma-1-16362 | NW_003037834.1 | + | 723766    | 723814    |
| Sma-1-16363 | NS_000200.1    | + | 73884252  | 73884300  |
| Sma-1-16364 | NS_000200.1    | - | 344188496 | 344188448 |
| Sma-1-16365 | NS_000200.1    | - | 339259667 | 339259619 |
| Sma-1-16366 | NW_003038261.1 | + | 457913    | 457961    |
| Sma-1-16367 | NS_000200.1    | + | 324071564 | 324071612 |
| Sma-1-16368 | NW_003020214.1 | + | 651       | 699       |
| Sma-1-16369 | NW_003022681.1 | - | 1985      | 1937      |
| Sma-1-16370 | NW_003024359.1 | - | 1171      | 1123      |
| Sma-1-16371 | NW_003026497.1 | + | 3         | 51        |
| Sma-1-16372 | NW_003026497.1 | + | 346       | 394       |
| Sma-1-16373 | NW_003026497.1 | + | 689       | 737       |
| Sma-1-16374 | NW_003026497.1 | + | 1032      | 1080      |
| Sma-1-16375 | NW_003026557.1 | + | 63562     | 63610     |
| Sma-1-16376 | NW_003026571.1 | + | 18068     | 18116     |
| Sma-1-16377 | NW_003029352.1 | - | 1865      | 1817      |
| Sma-1-16378 | NW_003032152.1 | + | 24388     | 24436     |
| Sma-1-16379 | NW_003033784.1 | - | 2886      | 2838      |
| Sma-1-16380 | NW_003037033.1 | - | 1423      | 1375      |
| Sma-1-16381 | NW_003026617.1 | + | 341776    | 341824    |
| Sma-1-16382 | NW_003026617.1 | - | 341538    | 341490    |
| Sma-1-16383 | NW_003038073.1 | - | 9448      | 9400      |
| Sma-1-16384 | NW_003037873.1 | + | 147010    | 147058    |
| Sma-1-16385 | NW_003037876.1 | - | 204211    | 204163    |
| Sma-1-16386 | NW_003026601.1 | - | 12252     | 12204     |
| Sma-1-16387 | NW_003026602.1 | + | 43640     | 43688     |
| Sma-1-16388 | NW_003038222.1 | - | 113550    | 113502    |
| Sma-1-16389 | NW_003037867.1 | - | 131699    | 131651    |
| Sma-1-16390 | NW_003038225.1 | + | 170760    | 170808    |
| Sma-1-16391 | NW_003038226.1 | - | 32812     | 32764     |
| Sma-1-16392 | NW_003038228.1 | + | 228919    | 228967    |

|             |                |   |         |         |
|-------------|----------------|---|---------|---------|
| Sma-1-16393 | NW_003038005.1 | + | 234182  | 234230  |
| Sma-1-16394 | NW_003038005.1 | + | 433395  | 433443  |
| Sma-1-16395 | NW_003038013.1 | - | 201253  | 201205  |
| Sma-1-16396 | NW_003039068.1 | + | 1480    | 1528    |
| Sma-1-16397 | NW_003037708.1 | - | 8546    | 8498    |
| Sma-1-16398 | NW_003037929.1 | + | 137531  | 137579  |
| Sma-1-16399 | NW_003037929.1 | - | 9654    | 9606    |
| Sma-1-16400 | NW_003037934.1 | - | 142943  | 142895  |
| Sma-1-16401 | NW_003037937.1 | + | 114050  | 114098  |
| Sma-1-16402 | NW_003026458.1 | - | 491897  | 491849  |
| Sma-1-16403 | NW_003038070.1 | + | 49014   | 49062   |
| Sma-1-16404 | NW_003038415.1 | + | 8770    | 8818    |
| Sma-1-16405 | NW_003026456.1 | - | 271424  | 271376  |
| Sma-1-16406 | NW_003026464.1 | - | 161118  | 161070  |
| Sma-1-16407 | NW_003037793.1 | + | 1611648 | 1611696 |
| Sma-1-16408 | NW_003037793.1 | - | 1359641 | 1359593 |
| Sma-1-16409 | NW_003037794.1 | + | 696475  | 696523  |
| Sma-1-16410 | NW_003037796.1 | - | 1765513 | 1765465 |
| Sma-1-16411 | NW_003037797.1 | - | 2906565 | 2906517 |
| Sma-1-16412 | NW_003037797.1 | - | 1825343 | 1825295 |
| Sma-1-16413 | NW_003037799.1 | - | 1185289 | 1185241 |
| Sma-1-16414 | NW_003037800.1 | + | 465598  | 465646  |
| Sma-1-16415 | NW_003037800.1 | - | 1124644 | 1124596 |
| Sma-1-16416 | NW_003037806.1 | + | 292662  | 292710  |
| Sma-1-16417 | NW_003037809.1 | + | 1376083 | 1376131 |
| Sma-1-16418 | NW_003037809.1 | + | 2119500 | 2119548 |
| Sma-1-16419 | NW_003037809.1 | + | 2404329 | 2404377 |
| Sma-1-16420 | NW_003037809.1 | - | 1545276 | 1545228 |
| Sma-1-16421 | NW_003037810.1 | + | 697843  | 697891  |
| Sma-1-16422 | NW_003037815.1 | - | 409944  | 409896  |
| Sma-1-16423 | NW_003037818.1 | - | 575452  | 575404  |
| Sma-1-16424 | NW_003037821.1 | + | 86346   | 86394   |
| Sma-1-16425 | NW_003037821.1 | + | 589310  | 589358  |
| Sma-1-16426 | NW_003037821.1 | + | 1098262 | 1098310 |
| Sma-1-16427 | NW_003037824.1 | + | 676687  | 676735  |
| Sma-1-16428 | NW_003037824.1 | - | 564472  | 564424  |
| Sma-1-16429 | NW_003037825.1 | - | 1827847 | 1827799 |
| Sma-1-16430 | NW_003037825.1 | - | 1029401 | 1029353 |
| Sma-1-16431 | NW_003037827.1 | + | 52898   | 52946   |
| Sma-1-16432 | NW_003037827.1 | + | 1235084 | 1235132 |
| Sma-1-16433 | NW_003037827.1 | + | 1351947 | 1351995 |
| Sma-1-16434 | NW_003037827.1 | - | 1234787 | 1234739 |
| Sma-1-16435 | NW_003037829.1 | - | 1676244 | 1676196 |
| Sma-1-16436 | NW_003037829.1 | - | 342884  | 342836  |
| Sma-1-16437 | NW_003037831.1 | + | 640348  | 640396  |
| Sma-1-16438 | NW_003037835.1 | + | 979695  | 979743  |
| Sma-1-16439 | NW_003037835.1 | - | 875739  | 875691  |
| Sma-1-16440 | NW_003037836.1 | + | 1079407 | 1079455 |
| Sma-1-16441 | NW_003037836.1 | - | 910844  | 910796  |
| Sma-1-16442 | NW_003037837.1 | + | 652917  | 652965  |
| Sma-1-16443 | NW_003037842.1 | + | 94979   | 95027   |
| Sma-1-16444 | NW_003037842.1 | + | 240436  | 240484  |



|             |                |   |         |         |
|-------------|----------------|---|---------|---------|
| Sma-1-16445 | NW_003037843.1 | + | 48508   | 48556   |
| Sma-1-16446 | NW_003037844.1 | + | 382462  | 382510  |
| Sma-1-16447 | NW_003037846.1 | - | 656578  | 656530  |
| Sma-1-16448 | NW_003037848.1 | + | 1270506 | 1270554 |
| Sma-1-16449 | NW_003037848.1 | - | 1270224 | 1270176 |
| Sma-1-16450 | NW_003037851.1 | + | 315770  | 315818  |
| Sma-1-16451 | NW_003037852.1 | + | 879256  | 879304  |
| Sma-1-16452 | NW_003037853.1 | - | 1405508 | 1405460 |
| Sma-1-16453 | NW_003037853.1 | - | 682365  | 682317  |
| Sma-1-16454 | NW_003037855.1 | + | 19615   | 19663   |
| Sma-1-16455 | NW_003037863.1 | + | 434081  | 434129  |
| Sma-1-16456 | NW_003037864.1 | + | 774885  | 774933  |
| Sma-1-16457 | NW_003037865.1 | - | 75539   | 75491   |
| Sma-1-16458 | NW_003037880.1 | + | 510412  | 510460  |
| Sma-1-16459 | NW_003037883.1 | + | 55228   | 55276   |
| Sma-1-16460 | NW_003037883.1 | + | 155564  | 155612  |
| Sma-1-16461 | NW_003037884.1 | + | 776339  | 776387  |
| Sma-1-16462 | NW_003037885.1 | + | 433946  | 433994  |
| Sma-1-16463 | NW_003037885.1 | + | 1102962 | 1103010 |
| Sma-1-16464 | NW_003037885.1 | - | 1137407 | 1137359 |
| Sma-1-16465 | NW_003037885.1 | - | 69583   | 69535   |
| Sma-1-16466 | NW_003037891.1 | - | 2776175 | 2776127 |
| Sma-1-16467 | NW_003037892.1 | + | 23220   | 23268   |
| Sma-1-16468 | NW_003037892.1 | - | 23013   | 22965   |
| Sma-1-16469 | NW_003037894.1 | + | 156402  | 156450  |
| Sma-1-16470 | NW_003037894.1 | + | 176419  | 176467  |
| Sma-1-16471 | NW_003037897.1 | + | 217393  | 217441  |
| Sma-1-16472 | NW_003037899.1 | - | 379102  | 379054  |
| Sma-1-16473 | NW_003037900.1 | + | 208884  | 208932  |
| Sma-1-16474 | NW_003037904.1 | + | 500     | 548     |
| Sma-1-16475 | NW_003037909.1 | - | 784915  | 784867  |
| Sma-1-16476 | NW_003037911.1 | + | 541644  | 541692  |
| Sma-1-16477 | NW_003037912.1 | + | 720534  | 720582  |
| Sma-1-16478 | NW_003037912.1 | - | 534383  | 534335  |
| Sma-1-16479 | NW_003037913.1 | - | 344237  | 344189  |
| Sma-1-16480 | NW_003037916.1 | + | 542961  | 543009  |
| Sma-1-16481 | NW_003037916.1 | + | 751461  | 751509  |
| Sma-1-16482 | NW_003037917.1 | + | 361113  | 361161  |
| Sma-1-16483 | NW_003037917.1 | - | 771872  | 771824  |
| Sma-1-16484 | NW_003037917.1 | - | 47636   | 47588   |
| Sma-1-16485 | NW_003037924.1 | - | 32295   | 32247   |
| Sma-1-16486 | NW_003037928.1 | + | 176625  | 176673  |
| Sma-1-16487 | NW_003037928.1 | + | 497346  | 497394  |
| Sma-1-16488 | NW_003037930.1 | - | 156203  | 156155  |
| Sma-1-16489 | NW_003037935.1 | - | 72900   | 72852   |
| Sma-1-16490 | NW_003037939.1 | + | 871826  | 871874  |
| Sma-1-16491 | NW_003037939.1 | - | 857729  | 857681  |
| Sma-1-16492 | NW_003037940.1 | - | 580017  | 579969  |
| Sma-1-16493 | NW_003037945.1 | - | 1032070 | 1032022 |
| Sma-1-16494 | NW_003037964.1 | + | 138     | 186     |
| Sma-1-16495 | NW_003037966.1 | + | 477182  | 477230  |
| Sma-1-16496 | NW_003037972.1 | + | 515546  | 515594  |

|             |                |   |         |         |
|-------------|----------------|---|---------|---------|
| Sma-1-16497 | NW_003037975.1 | - | 678638  | 678590  |
| Sma-1-16498 | NW_003037977.1 | - | 200014  | 199966  |
| Sma-1-16499 | NW_003037979.1 | + | 260471  | 260519  |
| Sma-1-16500 | NW_003037979.1 | - | 132375  | 132327  |
| Sma-1-16501 | NW_003038003.1 | + | 38940   | 38988   |
| Sma-1-16502 | NW_003038011.1 | + | 736346  | 736394  |
| Sma-1-16503 | NW_003038012.1 | + | 236343  | 236391  |
| Sma-1-16504 | NW_003038012.1 | - | 553359  | 553311  |
| Sma-1-16505 | NW_003038015.1 | - | 543980  | 543932  |
| Sma-1-16506 | NW_003038015.1 | - | 155931  | 155883  |
| Sma-1-16507 | NW_003038016.1 | - | 388902  | 388854  |
| Sma-1-16508 | NW_003038018.1 | + | 538069  | 538117  |
| Sma-1-16509 | NW_003038018.1 | + | 608346  | 608394  |
| Sma-1-16510 | NW_003038018.1 | - | 537736  | 537688  |
| Sma-1-16511 | NW_003038021.1 | + | 94491   | 94539   |
| Sma-1-16512 | NW_003038021.1 | - | 94302   | 94254   |
| Sma-1-16513 | NW_003038028.1 | - | 634603  | 634555  |
| Sma-1-16514 | NW_003038033.1 | + | 260784  | 260832  |
| Sma-1-16515 | NW_003038034.1 | - | 812125  | 812077  |
| Sma-1-16516 | NW_003038034.1 | - | 680233  | 680185  |
| Sma-1-16517 | NW_003038072.1 | + | 5439    | 5487    |
| Sma-1-16518 | NW_003038210.1 | + | 98234   | 98282   |
| Sma-1-16519 | NW_003038239.1 | - | 142205  | 142157  |
| Sma-1-16520 | NW_003038243.1 | - | 173157  | 173109  |
| Sma-1-16521 | NW_003038254.1 | + | 311037  | 311085  |
| Sma-1-16522 | NW_003038261.1 | + | 407929  | 407977  |
| Sma-1-16523 | NW_003038482.1 | - | 9717    | 9669    |
| Sma-1-16524 | NW_003039127.1 | + | 2299865 | 2299913 |
| Sma-1-16525 | NW_003026478.1 | + | 39985   | 40033   |
| Sma-1-16526 | NW_003026490.1 | - | 358688  | 358640  |
| Sma-1-16527 | NW_003026512.1 | - | 261019  | 260971  |
| Sma-1-16528 | NW_003038041.1 | - | 130825  | 130777  |
| Sma-1-16529 | NW_003038042.1 | + | 200385  | 200433  |
| Sma-1-16530 | NW_003038045.1 | - | 7948    | 7900    |
| Sma-1-16531 | NW_003038049.1 | - | 119722  | 119674  |
| Sma-1-16532 | NW_003038049.1 | - | 34844   | 34796   |
| Sma-1-16533 | NW_003038050.1 | + | 126372  | 126420  |
| Sma-1-16534 | NW_003038050.1 | - | 165113  | 165065  |
| Sma-1-16535 | NW_003038053.1 | + | 577383  | 577431  |
| Sma-1-16536 | NW_003038055.1 | + | 221072  | 221120  |
| Sma-1-16537 | NW_003038059.1 | + | 75295   | 75343   |
| Sma-1-16538 | NW_003038064.1 | - | 30775   | 30727   |
| Sma-1-16539 | NW_003038076.1 | - | 501552  | 501504  |
| Sma-1-16540 | NW_003038085.1 | + | 482366  | 482414  |
| Sma-1-16541 | NW_003038124.1 | + | 136319  | 136367  |
| Sma-1-16542 | NW_003038130.1 | - | 179445  | 179397  |
| Sma-1-16543 | NW_003038141.1 | - | 170836  | 170788  |
| Sma-1-16544 | NW_003038145.1 | - | 134379  | 134331  |
| Sma-1-16545 | NW_003038149.1 | - | 328229  | 328181  |
| Sma-1-16546 | NW_003038150.1 | + | 277118  | 277166  |
| Sma-1-16547 | NS_000200.1    | + | 1611648 | 1611696 |
| Sma-1-16548 | NS_000200.1    | + | 4876070 | 4876118 |

|             |             |   |           |           |
|-------------|-------------|---|-----------|-----------|
| Sma-1-16549 | NS_000200.1 | + | 19094958  | 19095006  |
| Sma-1-16550 | NS_000200.1 | + | 28487876  | 28487924  |
| Sma-1-16551 | NS_000200.1 | + | 35040547  | 35040595  |
| Sma-1-16552 | NS_000200.1 | + | 35783964  | 35784012  |
| Sma-1-16553 | NS_000200.1 | + | 36068793  | 36068841  |
| Sma-1-16554 | NS_000200.1 | + | 37302365  | 37302413  |
| Sma-1-16555 | NS_000200.1 | + | 53230830  | 53230878  |
| Sma-1-16556 | NS_000200.1 | + | 53733794  | 53733842  |
| Sma-1-16557 | NS_000200.1 | + | 54242746  | 54242794  |
| Sma-1-16558 | NS_000200.1 | + | 57607627  | 57607675  |
| Sma-1-16559 | NS_000200.1 | + | 62675039  | 62675087  |
| Sma-1-16560 | NS_000200.1 | + | 63857225  | 63857273  |
| Sma-1-16561 | NS_000200.1 | + | 63974088  | 63974136  |
| Sma-1-16562 | NS_000200.1 | + | 70089650  | 70089698  |
| Sma-1-16563 | NS_000200.1 | + | 75376203  | 75376251  |
| Sma-1-16564 | NS_000200.1 | + | 76636506  | 76636554  |
| Sma-1-16565 | NS_000200.1 | + | 77458775  | 77458823  |
| Sma-1-16566 | NS_000200.1 | + | 85194169  | 85194217  |
| Sma-1-16567 | NS_000200.1 | + | 85339626  | 85339674  |
| Sma-1-16568 | NS_000200.1 | + | 85687815  | 85687863  |
| Sma-1-16569 | NS_000200.1 | + | 86565908  | 86565956  |
| Sma-1-16570 | NS_000200.1 | + | 90963577  | 90963625  |
| Sma-1-16571 | NS_000200.1 | + | 93719080  | 93719128  |
| Sma-1-16572 | NS_000200.1 | + | 95271151  | 95271199  |
| Sma-1-16573 | NS_000200.1 | + | 98884365  | 98884413  |
| Sma-1-16574 | NS_000200.1 | + | 107192448 | 107192496 |
| Sma-1-16575 | NS_000200.1 | + | 109267459 | 109267507 |
| Sma-1-16576 | NS_000200.1 | + | 115377364 | 115377412 |
| Sma-1-16577 | NS_000200.1 | + | 118886138 | 118886186 |
| Sma-1-16578 | NS_000200.1 | + | 124193970 | 124194018 |
| Sma-1-16579 | NS_000200.1 | + | 126118951 | 126118999 |
| Sma-1-16580 | NS_000200.1 | + | 126219287 | 126219335 |
| Sma-1-16581 | NS_000200.1 | + | 127556004 | 127556052 |
| Sma-1-16582 | NS_000200.1 | + | 128531893 | 128531941 |
| Sma-1-16583 | NS_000200.1 | + | 129200909 | 129200957 |
| Sma-1-16584 | NS_000200.1 | + | 140746447 | 140746495 |
| Sma-1-16585 | NS_000200.1 | + | 142052975 | 142053023 |
| Sma-1-16586 | NS_000200.1 | + | 142072992 | 142073040 |
| Sma-1-16587 | NS_000200.1 | + | 143699769 | 143699817 |
| Sma-1-16588 | NS_000200.1 | + | 145337750 | 145337798 |
| Sma-1-16589 | NS_000200.1 | + | 148714999 | 148715047 |
| Sma-1-16590 | NS_000200.1 | + | 156328997 | 156329045 |
| Sma-1-16591 | NS_000200.1 | + | 157532109 | 157532157 |
| Sma-1-16592 | NS_000200.1 | + | 163736372 | 163736420 |
| Sma-1-16593 | NS_000200.1 | + | 163944872 | 163944920 |
| Sma-1-16594 | NS_000200.1 | + | 165397917 | 165397965 |
| Sma-1-16595 | NS_000200.1 | + | 174500578 | 174500626 |
| Sma-1-16596 | NS_000200.1 | + | 174821299 | 174821347 |
| Sma-1-16597 | NS_000200.1 | + | 175378309 | 175378357 |
| Sma-1-16598 | NS_000200.1 | + | 181313959 | 181314007 |
| Sma-1-16599 | NS_000200.1 | + | 183741580 | 183741628 |
| Sma-1-16600 | NS_000200.1 | + | 197601660 | 197601708 |

|             |             |   |           |           |
|-------------|-------------|---|-----------|-----------|
| Sma-1-16601 | NS_000200.1 | + | 199179045 | 199179093 |
| Sma-1-16602 | NS_000200.1 | + | 202991250 | 202991298 |
| Sma-1-16603 | NS_000200.1 | + | 210321491 | 210321539 |
| Sma-1-16604 | NS_000200.1 | + | 223538222 | 223538270 |
| Sma-1-16605 | NS_000200.1 | + | 224640136 | 224640184 |
| Sma-1-16606 | NS_000200.1 | + | 224839349 | 224839397 |
| Sma-1-16607 | NS_000200.1 | + | 228263996 | 228264044 |
| Sma-1-16608 | NS_000200.1 | + | 228560282 | 228560330 |
| Sma-1-16609 | NS_000200.1 | + | 232938919 | 232938967 |
| Sma-1-16610 | NS_000200.1 | + | 233009196 | 233009244 |
| Sma-1-16611 | NS_000200.1 | + | 234923066 | 234923114 |
| Sma-1-16612 | NS_000200.1 | + | 246240786 | 246240834 |
| Sma-1-16613 | NS_000200.1 | + | 254145984 | 254146032 |
| Sma-1-16614 | NS_000200.1 | + | 254241534 | 254241582 |
| Sma-1-16615 | NS_000200.1 | + | 256401266 | 256401314 |
| Sma-1-16616 | NS_000200.1 | + | 257937478 | 257937526 |
| Sma-1-16617 | NS_000200.1 | + | 258920394 | 258920442 |
| Sma-1-16618 | NS_000200.1 | + | 260317367 | 260317415 |
| Sma-1-16619 | NS_000200.1 | + | 264386255 | 264386303 |
| Sma-1-16620 | NS_000200.1 | + | 265167667 | 265167715 |
| Sma-1-16621 | NS_000200.1 | + | 272172459 | 272172507 |
| Sma-1-16622 | NS_000200.1 | + | 274660195 | 274660243 |
| Sma-1-16623 | NS_000200.1 | + | 274660538 | 274660586 |
| Sma-1-16624 | NS_000200.1 | + | 274660881 | 274660929 |
| Sma-1-16625 | NS_000200.1 | + | 274661224 | 274661272 |
| Sma-1-16626 | NS_000200.1 | + | 279128963 | 279129011 |
| Sma-1-16627 | NS_000200.1 | + | 291755856 | 291755904 |
| Sma-1-16628 | NS_000200.1 | + | 301051605 | 301051653 |
| Sma-1-16629 | NS_000200.1 | + | 301720083 | 301720131 |
| Sma-1-16630 | NS_000200.1 | + | 305560133 | 305560181 |
| Sma-1-16631 | NS_000200.1 | + | 306963623 | 306963671 |
| Sma-1-16632 | NS_000200.1 | + | 310025424 | 310025472 |
| Sma-1-16633 | NS_000200.1 | + | 311102199 | 311102247 |
| Sma-1-16634 | NS_000200.1 | + | 319912635 | 319912683 |
| Sma-1-16635 | NS_000200.1 | + | 320346595 | 320346643 |
| Sma-1-16636 | NS_000200.1 | + | 324021580 | 324021628 |
| Sma-1-16637 | NS_000200.1 | + | 328775394 | 328775442 |
| Sma-1-16638 | NS_000200.1 | + | 359826500 | 359826548 |
| Sma-1-16639 | NS_000200.1 | + | 371213780 | 371213828 |
| Sma-1-16640 | NS_000200.1 | + | 379254909 | 379254957 |
| Sma-1-16641 | NS_000200.1 | - | 375728468 | 375728420 |
| Sma-1-16642 | NS_000200.1 | - | 365583550 | 365583502 |
| Sma-1-16643 | NS_000200.1 | - | 365414729 | 365414681 |
| Sma-1-16644 | NS_000200.1 | - | 358967208 | 358967160 |
| Sma-1-16645 | NS_000200.1 | - | 357357826 | 357357778 |
| Sma-1-16646 | NS_000200.1 | - | 343703583 | 343703535 |
| Sma-1-16647 | NS_000200.1 | - | 332987168 | 332987120 |
| Sma-1-16648 | NS_000200.1 | - | 319912397 | 319912349 |
| Sma-1-16649 | NS_000200.1 | - | 315111641 | 315111593 |
| Sma-1-16650 | NS_000200.1 | - | 313982987 | 313982939 |
| Sma-1-16651 | NS_000200.1 | - | 310063846 | 310063798 |
| Sma-1-16652 | NS_000200.1 | - | 308901214 | 308901166 |

|             |             |   |           |           |
|-------------|-------------|---|-----------|-----------|
| Sma-1-16653 | NS_000200.1 | - | 306393861 | 306393813 |
| Sma-1-16654 | NS_000200.1 | - | 291356842 | 291356794 |
| Sma-1-16655 | NS_000200.1 | - | 288745802 | 288745754 |
| Sma-1-16656 | NS_000200.1 | - | 287060815 | 287060767 |
| Sma-1-16657 | NS_000200.1 | - | 285355059 | 285355011 |
| Sma-1-16658 | NS_000200.1 | - | 281734431 | 281734383 |
| Sma-1-16659 | NS_000200.1 | - | 267990404 | 267990356 |
| Sma-1-16660 | NS_000200.1 | - | 266718726 | 266718678 |
| Sma-1-16661 | NS_000200.1 | - | 265531881 | 265531833 |
| Sma-1-16662 | NS_000200.1 | - | 261867352 | 261867304 |
| Sma-1-16663 | NS_000200.1 | - | 256440007 | 256439959 |
| Sma-1-16664 | NS_000200.1 | - | 256095249 | 256095201 |
| Sma-1-16665 | NS_000200.1 | - | 256010371 | 256010323 |
| Sma-1-16666 | NS_000200.1 | - | 254785559 | 254785511 |
| Sma-1-16667 | NS_000200.1 | - | 253798107 | 253798059 |
| Sma-1-16668 | NS_000200.1 | - | 247753881 | 247753833 |
| Sma-1-16669 | NS_000200.1 | - | 247621989 | 247621941 |
| Sma-1-16670 | NS_000200.1 | - | 241942177 | 241942129 |
| Sma-1-16671 | NS_000200.1 | - | 234922877 | 234922829 |
| Sma-1-16672 | NS_000200.1 | - | 232938586 | 232938538 |
| Sma-1-16673 | NS_000200.1 | - | 231505439 | 231505391 |
| Sma-1-16674 | NS_000200.1 | - | 230867470 | 230867422 |
| Sma-1-16675 | NS_000200.1 | - | 230479421 | 230479373 |
| Sma-1-16676 | NS_000200.1 | - | 229590879 | 229590831 |
| Sma-1-16677 | NS_000200.1 | - | 228877298 | 228877250 |
| Sma-1-16678 | NS_000200.1 | - | 210193395 | 210193347 |
| Sma-1-16679 | NS_000200.1 | - | 208486034 | 208485986 |
| Sma-1-16680 | NS_000200.1 | - | 206260862 | 206260814 |
| Sma-1-16681 | NS_000200.1 | - | 203461427 | 203461379 |
| Sma-1-16682 | NS_000200.1 | - | 190134034 | 190133986 |
| Sma-1-16683 | NS_000200.1 | - | 184322147 | 184322099 |
| Sma-1-16684 | NS_000200.1 | - | 183727483 | 183727435 |
| Sma-1-16685 | NS_000200.1 | - | 179489435 | 179489387 |
| Sma-1-16686 | NS_000200.1 | - | 179189690 | 179189642 |
| Sma-1-16687 | NS_000200.1 | - | 176014167 | 176014119 |
| Sma-1-16688 | NS_000200.1 | - | 175250432 | 175250384 |
| Sma-1-16689 | NS_000200.1 | - | 171739253 | 171739205 |
| Sma-1-16690 | NS_000200.1 | - | 165808676 | 165808628 |
| Sma-1-16691 | NS_000200.1 | - | 165084440 | 165084392 |
| Sma-1-16692 | NS_000200.1 | - | 158907988 | 158907940 |
| Sma-1-16693 | NS_000200.1 | - | 157345958 | 157345910 |
| Sma-1-16694 | NS_000200.1 | - | 154326564 | 154326516 |
| Sma-1-16695 | NS_000200.1 | - | 144898213 | 144898165 |
| Sma-1-16696 | NS_000200.1 | - | 140746240 | 140746192 |
| Sma-1-16697 | NS_000200.1 | - | 140657453 | 140657405 |
| Sma-1-16698 | NS_000200.1 | - | 129235354 | 129235306 |
| Sma-1-16699 | NS_000200.1 | - | 128167530 | 128167482 |
| Sma-1-16700 | NS_000200.1 | - | 120749847 | 120749799 |
| Sma-1-16701 | NS_000200.1 | - | 115732518 | 115732470 |
| Sma-1-16702 | NS_000200.1 | - | 110497458 | 110497410 |
| Sma-1-16703 | NS_000200.1 | - | 102360127 | 102360079 |
| Sma-1-16704 | NS_000200.1 | - | 96897559  | 96897511  |

|             |                |   |           |           |
|-------------|----------------|---|-----------|-----------|
| Sma-1-16705 | NS_000200.1    | - | 96174416  | 96174368  |
| Sma-1-16706 | NS_000200.1    | - | 90963295  | 90963247  |
| Sma-1-16707 | NS_000200.1    | - | 88291148  | 88291100  |
| Sma-1-16708 | NS_000200.1    | - | 76467943  | 76467895  |
| Sma-1-16709 | NS_000200.1    | - | 75272247  | 75272199  |
| Sma-1-16710 | NS_000200.1    | - | 67576782  | 67576734  |
| Sma-1-16711 | NS_000200.1    | - | 66243422  | 66243374  |
| Sma-1-16712 | NS_000200.1    | - | 63856928  | 63856880  |
| Sma-1-16713 | NS_000200.1    | - | 60957629  | 60957581  |
| Sma-1-16714 | NS_000200.1    | - | 60159183  | 60159135  |
| Sma-1-16715 | NS_000200.1    | - | 58194560  | 58194512  |
| Sma-1-16716 | NS_000200.1    | - | 57495412  | 57495364  |
| Sma-1-16717 | NS_000200.1    | - | 49290859  | 49290811  |
| Sma-1-16718 | NS_000200.1    | - | 45672935  | 45672887  |
| Sma-1-16719 | NS_000200.1    | - | 35209740  | 35209692  |
| Sma-1-16720 | NS_000200.1    | - | 19754004  | 19753956  |
| Sma-1-16721 | NS_000200.1    | - | 18175643  | 18175595  |
| Sma-1-16722 | NS_000200.1    | - | 13334425  | 13334377  |
| Sma-1-16723 | NS_000200.1    | - | 12253203  | 12253155  |
| Sma-1-16724 | NS_000200.1    | - | 9975157   | 9975109   |
| Sma-1-16725 | NS_000200.1    | - | 1359641   | 1359593   |
| Sma-1-16726 | NW_003038009.1 | - | 324106    | 324058    |
| Sma-1-16727 | NS_000200.1    | - | 226698169 | 226698121 |
| Sma-1-16728 | NW_003026594.1 | + | 63283     | 63331     |
| Sma-1-16729 | NW_003037819.1 | - | 180365    | 180317    |
| Sma-1-16730 | NS_000200.1    | + | 305007653 | 305007701 |
| Sma-1-16731 | NS_000200.1    | - | 51268630  | 51268582  |
| Sma-1-16732 | NW_003037838.1 | - | 659927    | 659879    |
| Sma-1-16733 | NW_003037871.1 | + | 409476    | 409524    |
| Sma-1-16734 | NS_000200.1    | + | 117857214 | 117857262 |
| Sma-1-16735 | NS_000200.1    | - | 78658490  | 78658442  |
| Sma-1-16736 | NW_003037839.1 | - | 1308240   | 1308192   |
| Sma-1-16737 | NS_000200.1    | - | 80266390  | 80266342  |
| Sma-1-16738 | NW_003037840.1 | - | 1229292   | 1229244   |
| Sma-1-16739 | NS_000200.1    | - | 81852616  | 81852568  |
| Sma-1-16740 | NW_003038249.1 | + | 80966     | 81014     |
| Sma-1-16741 | NS_000200.1    | + | 316763219 | 316763267 |
| Sma-1-16742 | NW_003027588.1 | + | 287       | 335       |
| Sma-1-16743 | NW_003037841.1 | - | 188116    | 188068    |
| Sma-1-16744 | NW_003037850.1 | - | 297755    | 297707    |
| Sma-1-16745 | NW_003037942.1 | + | 623273    | 623321    |
| Sma-1-16746 | NW_003038011.1 | - | 720320    | 720272    |
| Sma-1-16747 | NS_000200.1    | + | 186383181 | 186383229 |
| Sma-1-16748 | NS_000200.1    | + | 361682883 | 361682931 |
| Sma-1-16749 | NS_000200.1    | - | 228247970 | 228247922 |
| Sma-1-16750 | NS_000200.1    | - | 92283785  | 92283737  |
| Sma-1-16751 | NS_000200.1    | - | 82799297  | 82799249  |
| Sma-1-16752 | NW_003037851.1 | + | 959702    | 959750    |
| Sma-1-16753 | NW_003037853.1 | - | 1025127   | 1025079   |
| Sma-1-16754 | NS_000200.1    | + | 94363012  | 94363060  |
| Sma-1-16755 | NS_000200.1    | - | 96517178  | 96517130  |
| Sma-1-16756 | NW_003038028.1 | - | 343097    | 343049    |

|             |                |   |           |           |
|-------------|----------------|---|-----------|-----------|
| Sma-1-16757 | NS_000200.1    | - | 241650671 | 241650623 |
| Sma-1-16758 | NW_003026458.1 | - | 243732    | 243684    |
| Sma-1-16759 | NW_003037804.1 | + | 872575    | 872623    |
| Sma-1-16760 | NW_003037835.1 | + | 1064525   | 1064573   |
| Sma-1-16761 | NW_003037848.1 | + | 338975    | 339023    |
| Sma-1-16762 | NW_003037848.1 | - | 338591    | 338543    |
| Sma-1-16763 | NW_003037914.1 | + | 1665820   | 1665868   |
| Sma-1-16764 | NW_003037915.1 | + | 438376    | 438424    |
| Sma-1-16765 | NW_003037915.1 | - | 981507    | 981459    |
| Sma-1-16766 | NW_003037932.1 | - | 497648    | 497600    |
| Sma-1-16767 | NW_003037945.1 | + | 1028129   | 1028177   |
| Sma-1-16768 | NW_003037967.1 | - | 581152    | 581104    |
| Sma-1-16769 | NW_003038039.1 | - | 78103     | 78055     |
| Sma-1-16770 | NS_000200.1    | + | 26012595  | 26012643  |
| Sma-1-16771 | NS_000200.1    | + | 75461033  | 75461081  |
| Sma-1-16772 | NS_000200.1    | + | 90032046  | 90032094  |
| Sma-1-16773 | NS_000200.1    | + | 161810070 | 161810118 |
| Sma-1-16774 | NS_000200.1    | + | 162338362 | 162338410 |
| Sma-1-16775 | NS_000200.1    | + | 190130093 | 190130141 |
| Sma-1-16776 | NS_000200.1    | - | 253515949 | 253515901 |
| Sma-1-16777 | NS_000200.1    | - | 199821123 | 199821075 |
| Sma-1-16778 | NS_000200.1    | - | 178030844 | 178030796 |
| Sma-1-16779 | NS_000200.1    | - | 162881493 | 162881445 |
| Sma-1-16780 | NS_000200.1    | - | 102111962 | 102111914 |
| Sma-1-16781 | NS_000200.1    | - | 90031662  | 90031614  |
| Sma-1-16782 | NW_003037940.1 | + | 742747    | 742795    |
| Sma-1-16783 | NS_000200.1    | + | 184484877 | 184484925 |
| Sma-1-16784 | NW_003037800.1 | + | 552223    | 552271    |
| Sma-1-16785 | NS_000200.1    | + | 19181583  | 19181631  |
| Sma-1-16786 | NW_003037922.1 | - | 390136    | 390088    |
| Sma-1-16787 | NS_000200.1    | - | 170314133 | 170314085 |
| Sma-1-16788 | NW_003037802.1 | + | 868052    | 868100    |
| Sma-1-16789 | NS_000200.1    | + | 22870846  | 22870894  |
| Sma-1-16790 | NW_003037804.1 | + | 1203600   | 1203648   |
| Sma-1-16791 | NS_000200.1    | + | 26343620  | 26343668  |
| Sma-1-16792 | NW_003037804.1 | + | 800334    | 800382    |
| Sma-1-16793 | NS_000200.1    | + | 25940354  | 25940402  |
| Sma-1-16794 | NW_003037930.1 | + | 886488    | 886536    |
| Sma-1-16795 | NS_000200.1    | + | 176744452 | 176744500 |
| Sma-1-16796 | NW_003035682.1 | + | 47105     | 47153     |
| Sma-1-16797 | NW_003038228.1 | + | 206254    | 206302    |
| Sma-1-16798 | NS_000200.1    | + | 311079534 | 311079582 |
| Sma-1-16799 | NS_000200.1    | + | 332669158 | 332669206 |
| Sma-1-16800 | NW_003028654.1 | + | 95        | 143       |
| Sma-1-16801 | NS_000200.1    | + | 374820031 | 374820079 |
| Sma-1-16802 | NW_003037886.1 | - | 48529     | 48481     |
| Sma-1-16803 | NW_003037886.1 | - | 13279     | 13231     |
| Sma-1-16804 | NS_000200.1    | - | 129304096 | 129304048 |
| Sma-1-16805 | NS_000200.1    | - | 129268846 | 129268798 |
| Sma-1-16806 | NW_003022970.1 | + | 83        | 131       |
| Sma-1-16807 | NW_003026459.1 | - | 233031    | 232983    |
| Sma-1-16808 | NW_003037795.1 | - | 1263070   | 1263022   |

|             |                |   |           |           |
|-------------|----------------|---|-----------|-----------|
| Sma-1-16809 | NW_003038247.1 | - | 359410    | 359362    |
| Sma-1-16810 | NW_003038187.1 | - | 5260      | 5212      |
| Sma-1-16811 | NS_000200.1    | + | 371971437 | 371971485 |
| Sma-1-16812 | NS_000200.1    | - | 316308138 | 316308090 |
| Sma-1-16813 | NS_000200.1    | - | 301957118 | 301957070 |
| Sma-1-16814 | NS_000200.1    | - | 141878304 | 141878256 |
| Sma-1-16815 | NS_000200.1    | - | 7653953   | 7653905   |
| Sma-1-16816 | NW_003037795.1 | + | 1185702   | 1185750   |
| Sma-1-16817 | NS_000200.1    | + | 7576585   | 7576633   |
| Sma-1-16818 | NW_003037939.1 | + | 332739    | 332787    |
| Sma-1-16819 | NS_000200.1    | + | 183202493 | 183202541 |
| Sma-1-16820 | NW_003037928.1 | - | 6301      | 6253      |
| Sma-1-16821 | NW_003038041.1 | - | 131171    | 131123    |
| Sma-1-16822 | NS_000200.1    | - | 253798453 | 253798405 |
| Sma-1-16823 | NS_000200.1    | - | 174330254 | 174330206 |
| Sma-1-16824 | NW_003037944.1 | - | 805071    | 805023    |
| Sma-1-16825 | NW_003038152.1 | + | 389369    | 389417    |
| Sma-1-16826 | NS_000200.1    | + | 292995093 | 292995141 |
| Sma-1-16827 | NS_000200.1    | - | 189026424 | 189026376 |
| Sma-1-16828 | NW_003037918.1 | + | 601843    | 601891    |
| Sma-1-16829 | NS_000200.1    | + | 167168833 | 167168881 |
| Sma-1-16830 | NW_003037903.1 | + | 732640    | 732688    |
| Sma-1-16831 | NS_000200.1    | + | 148286721 | 148286769 |
| Sma-1-16832 | NW_003037837.1 | - | 960574    | 960526    |
| Sma-1-16833 | NS_000200.1    | - | 77766432  | 77766384  |
| Sma-1-16834 | NW_003037844.1 | - | 772471    | 772423    |
| Sma-1-16835 | NS_000200.1    | - | 86955917  | 86955869  |
| Sma-1-16836 | NW_003038022.1 | + | 518389    | 518437    |
| Sma-1-16837 | NS_000200.1    | + | 236199231 | 236199279 |
| Sma-1-16838 | NW_003039127.1 | + | 1126139   | 1126187   |
| Sma-1-16839 | NS_000200.1    | + | 114203638 | 114203686 |
| Sma-1-16840 | NW_003039090.1 | - | 3716      | 3668      |
| Sma-1-16841 | NS_000200.1    | - | 360275396 | 360275348 |
| Sma-1-16842 | NW_003023592.1 | - | 1126      | 1078      |
| Sma-1-16843 | NS_000200.1    | - | 373766057 | 373766009 |
| Sma-1-16844 | NW_003020795.1 | + | 1291      | 1339      |
| Sma-1-16845 | NW_003022599.1 | + | 960       | 1008      |
| Sma-1-16846 | NW_003037937.1 | + | 61124     | 61172     |
| Sma-1-16847 | NW_003037937.1 | - | 60827     | 60779     |
| Sma-1-16848 | NW_003037807.1 | - | 492756    | 492708    |
| Sma-1-16849 | NW_003037822.1 | - | 428914    | 428866    |
| Sma-1-16850 | NW_003037903.1 | + | 419668    | 419716    |
| Sma-1-16851 | NW_003037911.1 | + | 544388    | 544436    |
| Sma-1-16852 | NS_000200.1    | + | 147973749 | 147973797 |
| Sma-1-16853 | NS_000200.1    | + | 156331741 | 156331789 |
| Sma-1-16854 | NS_000200.1    | + | 181261033 | 181261081 |
| Sma-1-16855 | NS_000200.1    | + | 364474639 | 364474687 |
| Sma-1-16856 | NS_000200.1    | + | 365255347 | 365255395 |
| Sma-1-16857 | NS_000200.1    | - | 181260736 | 181260688 |
| Sma-1-16858 | NS_000200.1    | - | 54736920  | 54736872  |
| Sma-1-16859 | NS_000200.1    | - | 30754272  | 30754224  |
| Sma-1-16860 | NW_003026459.1 | - | 215723    | 215675    |



|             |                |   |           |           |
|-------------|----------------|---|-----------|-----------|
| Sma-1-16861 | NS_000200.1    | - | 141860996 | 141860948 |
| Sma-1-16862 | NW_003026480.1 | - | 63311     | 63263     |
| Sma-1-16863 | NW_003026507.1 | + | 142213    | 142261    |
| Sma-1-16864 | NS_000200.1    | + | 279802364 | 279802412 |
| Sma-1-16865 | NS_000200.1    | - | 254948868 | 254948820 |
| Sma-1-16866 | NW_003038013.1 | - | 329096    | 329048    |
| Sma-1-16867 | NS_000200.1    | - | 229718722 | 229718674 |
| Sma-1-16868 | NW_003038412.1 | - | 14728     | 14680     |
| Sma-1-16869 | NW_003037871.1 | - | 396623    | 396575    |
| Sma-1-16870 | NS_000200.1    | - | 328582820 | 328582772 |
| Sma-1-16871 | NS_000200.1    | - | 117844361 | 117844313 |
| Sma-1-16872 | NW_003038080.1 | + | 148697    | 148745    |
| Sma-1-16873 | NS_000200.1    | + | 268601307 | 268601355 |
| Sma-1-16874 | NW_003038023.1 | + | 297805    | 297853    |
| Sma-1-16875 | NW_003038148.1 | - | 122062    | 122014    |
| Sma-1-16876 | NS_000200.1    | + | 237458096 | 237458144 |
| Sma-1-16877 | NS_000200.1    | - | 290196046 | 290195998 |
| Sma-1-16878 | NW_003037932.1 | + | 129965    | 130013    |
| Sma-1-16879 | NS_000200.1    | + | 177663161 | 177663209 |
| Sma-1-16880 | NW_003037798.1 | - | 688223    | 688175    |
| Sma-1-16881 | NS_000200.1    | - | 14947381  | 14947333  |
| Sma-1-16882 | NW_003037797.1 | - | 2409441   | 2409393   |
| Sma-1-16883 | NS_000200.1    | - | 12837301  | 12837253  |
| Sma-1-16884 | NW_003037807.1 | + | 1423270   | 1423318   |
| Sma-1-16885 | NW_003037807.1 | - | 1423000   | 1422952   |
| Sma-1-16886 | NS_000200.1    | + | 31684786  | 31684834  |
| Sma-1-16887 | NS_000200.1    | - | 31684516  | 31684468  |
| Sma-1-16888 | NW_003038010.1 | + | 182865    | 182913    |
| Sma-1-16889 | NS_000200.1    | + | 227001088 | 227001136 |
| Sma-1-16890 | NW_003037888.1 | + | 635265    | 635313    |
| Sma-1-16891 | NS_000200.1    | + | 132843757 | 132843805 |
| Sma-1-16892 | NW_003037818.1 | + | 1083141   | 1083189   |
| Sma-1-16893 | NS_000200.1    | + | 49798548  | 49798596  |
| Sma-1-16894 | NW_003037793.1 | + | 2729198   | 2729246   |
| Sma-1-16895 | NW_003037857.1 | + | 245861    | 245909    |
| Sma-1-16896 | NW_003038193.1 | + | 15389     | 15437     |
| Sma-1-16897 | NS_000200.1    | + | 2729198   | 2729246   |
| Sma-1-16898 | NS_000200.1    | + | 100266218 | 100266266 |
| Sma-1-16899 | NS_000200.1    | + | 302895269 | 302895317 |
| Sma-1-16900 | NW_003037819.1 | - | 546267    | 546219    |
| Sma-1-16901 | NS_000200.1    | - | 51634532  | 51634484  |
| Sma-1-16902 | NW_003037814.1 | + | 809562    | 809610    |
| Sma-1-16903 | NW_003037872.1 | + | 605995    | 606043    |
| Sma-1-16904 | NW_003037974.1 | + | 428975    | 429023    |
| Sma-1-16905 | NS_000200.1    | + | 43793422  | 43793470  |
| Sma-1-16906 | NS_000200.1    | + | 118563001 | 118563049 |
| Sma-1-16907 | NS_000200.1    | + | 205104281 | 205104329 |
| Sma-1-16908 | NW_003037884.1 | - | 1067607   | 1067559   |
| Sma-1-16909 | NS_000200.1    | - | 127847272 | 127847224 |
| Sma-1-16910 | NW_003038037.1 | - | 355770    | 355722    |
| Sma-1-16911 | NS_000200.1    | - | 250511179 | 250511131 |
| Sma-1-16912 | NW_003037943.1 | + | 1103067   | 1103115   |

|             |                |   |           |           |
|-------------|----------------|---|-----------|-----------|
| Sma-1-16913 | NS_000200.1    | + | 188124600 | 188124648 |
| Sma-1-16914 | NW_003032029.1 | - | 1148      | 1100      |
| Sma-1-16915 | NS_000200.1    | - | 376890170 | 376890122 |
| Sma-1-16916 | NW_003037797.1 | + | 2891719   | 2891767   |
| Sma-1-16917 | NS_000200.1    | + | 13319579  | 13319627  |
| Sma-1-16918 | NW_003038017.1 | - | 257924    | 257876    |
| Sma-1-16919 | NS_000200.1    | - | 232023955 | 232023907 |
| Sma-1-16920 | NW_003038014.1 | + | 242739    | 242787    |
| Sma-1-16921 | NS_000200.1    | + | 229983428 | 229983476 |
| Sma-1-16922 | NW_003037796.1 | + | 473978    | 474026    |
| Sma-1-16923 | NS_000200.1    | + | 8683622   | 8683670   |
| Sma-1-16924 | NW_003038192.1 | + | 20253     | 20301     |
| Sma-1-16925 | NS_000200.1    | + | 302582160 | 302582208 |
| Sma-1-16926 | NW_003039127.1 | + | 1551626   | 1551674   |
| Sma-1-16927 | NS_000200.1    | + | 114629125 | 114629173 |
| Sma-1-16928 | NW_003038163.1 | - | 503439    | 503391    |
| Sma-1-16929 | NS_000200.1    | - | 298903719 | 298903671 |
| Sma-1-16930 | NW_003037810.1 | - | 364021    | 363973    |
| Sma-1-16931 | NS_000200.1    | - | 36968543  | 36968495  |
| Sma-1-16932 | NW_003037915.1 | + | 1226978   | 1227026   |
| Sma-1-16933 | NS_000200.1    | + | 163126964 | 163127012 |
| Sma-1-16934 | NW_003037940.1 | + | 312213    | 312261    |
| Sma-1-16935 | NS_000200.1    | + | 184054343 | 184054391 |
| Sma-1-16936 | NW_003037878.1 | + | 249457    | 249505    |
| Sma-1-16937 | NS_000200.1    | + | 122302935 | 122302983 |
| Sma-1-16938 | NW_003038037.1 | + | 608474    | 608522    |
| Sma-1-16939 | NS_000200.1    | + | 250763883 | 250763931 |
| Sma-1-16940 | NW_003038257.1 | + | 379133    | 379181    |
| Sma-1-16941 | NS_000200.1    | + | 321553461 | 321553509 |
| Sma-1-16942 | NW_003026474.1 | + | 66750     | 66798     |
| Sma-1-16943 | NS_000200.1    | + | 253265325 | 253265373 |
| Sma-1-16944 | NW_003037890.1 | + | 752075    | 752123    |
| Sma-1-16945 | NS_000200.1    | + | 136435436 | 136435484 |
| Sma-1-16946 | NW_003026622.1 | + | 2568      | 2616      |
| Sma-1-16947 | NS_000200.1    | + | 324856935 | 324856983 |
| Sma-1-16948 | NW_003037910.1 | - | 161262    | 161214    |
| Sma-1-16949 | NS_000200.1    | - | 154673237 | 154673189 |
| Sma-1-16950 | NW_003037804.1 | + | 1176163   | 1176211   |
| Sma-1-16951 | NS_000200.1    | + | 26316183  | 26316231  |
| Sma-1-16952 | NW_003038192.1 | + | 10970     | 11018     |
| Sma-1-16953 | NS_000200.1    | + | 302572877 | 302572925 |
| Sma-1-16954 | NW_003026609.1 | + | 12817     | 12865     |
| Sma-1-16955 | NS_000200.1    | + | 309667809 | 309667857 |
| Sma-1-16956 | NW_003037825.1 | + | 789324    | 789372    |
| Sma-1-16957 | NS_000200.1    | + | 59919106  | 59919154  |
| Sma-1-16958 | NW_003038005.1 | - | 178683    | 178635    |
| Sma-1-16959 | NS_000200.1    | - | 224584637 | 224584589 |
| Sma-1-16960 | NW_003037852.1 | - | 475771    | 475723    |
| Sma-1-16961 | NS_000200.1    | - | 94867666  | 94867618  |
| Sma-1-16962 | NW_003037797.1 | + | 3237072   | 3237120   |
| Sma-1-16963 | NS_000200.1    | + | 13664932  | 13664980  |
| Sma-1-16964 | NW_003037886.1 | + | 1108772   | 1108820   |

|             |                |   |           |           |
|-------------|----------------|---|-----------|-----------|
| Sma-1-16965 | NS.000200.1    | + | 130364339 | 130364387 |
| Sma-1-16966 | NW_003038149.1 | + | 17689     | 17737     |
| Sma-1-16967 | NS.000200.1    | + | 291046302 | 291046350 |
| Sma-1-16968 | NW_003026472.1 | + | 417344    | 417392    |
| Sma-1-16969 | NS.000200.1    | + | 236829336 | 236829384 |
| Sma-1-16970 | NW_003038001.1 | + | 375147    | 375195    |
| Sma-1-16971 | NS.000200.1    | + | 223084708 | 223084756 |
| Sma-1-16972 | NW_003026619.1 | - | 187054    | 187006    |
| Sma-1-16973 | NS.000200.1    | - | 322377798 | 322377750 |
| Sma-1-16974 | NW_003037909.1 | + | 494799    | 494847    |
| Sma-1-16975 | NS.000200.1    | + | 154036448 | 154036496 |
| Sma-1-16976 | NW_003037817.1 | + | 596963    | 597011    |
| Sma-1-16977 | NS.000200.1    | + | 47979315  | 47979363  |
| Sma-1-16978 | NW_003037814.1 | + | 1021684   | 1021733   |
| Sma-1-16979 | NS.000200.1    | + | 44005544  | 44005593  |
| Sma-1-16980 | NW_003037813.1 | + | 1634075   | 1634123   |
| Sma-1-16981 | NS.000200.1    | + | 42620938  | 42620986  |
| Sma-1-16982 | NW_003037859.1 | - | 903327    | 903279    |
| Sma-1-16983 | NS.000200.1    | - | 103582168 | 103582120 |
| Sma-1-16984 | NW_003037886.1 | + | 944718    | 944766    |
| Sma-1-16985 | NS.000200.1    | + | 130200285 | 130200333 |
| Sma-1-16986 | NW_003038514.1 | + | 189173    | 189221    |
| Sma-1-16987 | NS.000200.1    | + | 339813712 | 339813760 |
| Sma-1-16988 | NW_003026458.1 | + | 337259    | 337307    |
| Sma-1-16989 | NS.000200.1    | + | 102205489 | 102205537 |
| Sma-1-16990 | NW_003038118.1 | - | 276797    | 276749    |
| Sma-1-16991 | NS.000200.1    | - | 277840924 | 277840876 |
| Sma-1-16992 | NW_003037830.1 | - | 763599    | 763551    |
| Sma-1-16993 | NS.000200.1    | - | 68653970  | 68653922  |
| Sma-1-16994 | NW_003037854.1 | - | 241368    | 241320    |
| Sma-1-16995 | NS.000200.1    | - | 97145789  | 97145741  |
| Sma-1-16996 | NW_003037830.1 | - | 1370438   | 1370360   |
| Sma-1-16997 | NS.000200.1    | - | 69260809  | 69260731  |
| Sma-1-16998 | NW_003038147.1 | + | 398705    | 398753    |
| Sma-1-16999 | NS.000200.1    | + | 289926448 | 289926496 |
| Sma-1-17000 | NW_003037898.1 | - | 120154    | 120106    |
| Sma-1-17001 | NS.000200.1    | - | 144103976 | 144103928 |
| Sma-1-17002 | NW_003037830.1 | - | 166308    | 166260    |
| Sma-1-17003 | NS.000200.1    | - | 68056679  | 68056631  |
| Sma-1-17004 | NW_003037915.1 | + | 282877    | 282925    |
| Sma-1-17005 | NS.000200.1    | + | 162182863 | 162182911 |
| Sma-1-17006 | NW_003037890.1 | - | 1103007   | 1102959   |
| Sma-1-17007 | NS.000200.1    | - | 136786368 | 136786320 |
| Sma-1-17008 | NW_003026517.1 | - | 544499    | 544451    |
| Sma-1-17009 | NS.000200.1    | - | 300150508 | 300150460 |
| Sma-1-17010 | NW_003037808.1 | + | 504301    | 504349    |
| Sma-1-17011 | NS.000200.1    | + | 32290938  | 32290986  |
| Sma-1-17012 | NW_003037815.1 | + | 681084    | 681132    |
| Sma-1-17013 | NS.000200.1    | + | 45944075  | 45944123  |
| Sma-1-17014 | NW_003037846.1 | - | 657103    | 657055    |
| Sma-1-17015 | NS.000200.1    | - | 88291673  | 88291625  |
| Sma-1-17016 | NW_003038007.1 | + | 153703    | 153751    |

|             |                |   |           |           |
|-------------|----------------|---|-----------|-----------|
| Sma-1-17017 | NS_000200.1    | + | 225402258 | 225402306 |
| Sma-1-17018 | NW_003037977.1 | + | 809459    | 809507    |
| Sma-1-17019 | NS_000200.1    | + | 209095479 | 209095527 |
| Sma-1-17020 | NW_003031712.1 | + | 346       | 394       |
| Sma-1-17021 | NS_000200.1    | + | 353705996 | 353706044 |
| Sma-1-17022 | NW_003038112.1 | + | 41374     | 41422     |
| Sma-1-17023 | NS_000200.1    | + | 276496552 | 276496600 |
| Sma-1-17024 | NW_003037907.1 | - | 120981    | 120933    |
| Sma-1-17025 | NS_000200.1    | - | 151525470 | 151525422 |
| Sma-1-17026 | NW_003037865.1 | - | 847990    | 847942    |
| Sma-1-17027 | NS_000200.1    | - | 111269909 | 111269861 |
| Sma-1-17028 | NW_003037917.1 | - | 944729    | 944681    |
| Sma-1-17029 | NS_000200.1    | - | 165981533 | 165981485 |
| Sma-1-17030 | NW_003037886.1 | - | 747368    | 747320    |
| Sma-1-17031 | NS_000200.1    | - | 130002935 | 130002887 |
| Sma-1-17032 | NW_003038145.1 | - | 100780    | 100732    |
| Sma-1-17033 | NS_000200.1    | - | 288712203 | 288712155 |
| Sma-1-17034 | NW_003037173.1 | - | 7443      | 7395      |
| Sma-1-17035 | NS_000200.1    | - | 362521471 | 362521423 |
| Sma-1-17036 | NW_003037890.1 | - | 1892233   | 1892184   |
| Sma-1-17037 | NS_000200.1    | - | 137575594 | 137575545 |
| Sma-1-17038 | NW_003037938.1 | + | 202138    | 202189    |
| Sma-1-17039 | NS_000200.1    | + | 182239251 | 182239302 |
| Sma-1-17040 | NW_003037803.1 | + | 450658    | 450706    |
| Sma-1-17041 | NS_000200.1    | + | 23951195  | 23951243  |
| Sma-1-17042 | NW_003038034.1 | - | 828426    | 828378    |
| Sma-1-17043 | NS_000200.1    | - | 247770182 | 247770134 |
| Sma-1-17044 | NW_003037970.1 | + | 215394    | 215441    |
| Sma-1-17045 | NS_000200.1    | + | 201271584 | 201271631 |
| Sma-1-17046 | NW_003037915.1 | - | 76285     | 76238     |
| Sma-1-17047 | NS_000200.1    | - | 161976271 | 161976224 |
| Sma-1-17048 | NW_003038001.1 | + | 302159    | 302206    |
| Sma-1-17049 | NS_000200.1    | + | 223011720 | 223011767 |
| Sma-1-17050 | NW_003037925.1 | + | 159168    | 159215    |
| Sma-1-17051 | NS_000200.1    | + | 172561171 | 172561218 |
| Sma-1-17052 | NW_003037793.1 | + | 2757203   | 2757251   |
| Sma-1-17053 | NS_000200.1    | + | 2757203   | 2757251   |
| Sma-1-17054 | NW_003037902.1 | + | 226629    | 226676    |
| Sma-1-17055 | NS_000200.1    | + | 146981863 | 146981910 |
| Sma-1-17056 | NW_003038036.1 | + | 409024    | 409072    |
| Sma-1-17057 | NS_000200.1    | + | 249342876 | 249342924 |
| Sma-1-17058 | NW_003038260.1 | - | 29398     | 29351     |
| Sma-1-17059 | NS_000200.1    | - | 323201173 | 323201126 |
| Sma-1-17060 | NW_003037889.1 | + | 1831489   | 1831536   |
| Sma-1-17061 | NS_000200.1    | + | 135607979 | 135608026 |
| Sma-1-17062 | NW_003037910.1 | + | 1036647   | 1036695   |
| Sma-1-17063 | NS_000200.1    | + | 155548622 | 155548670 |
| Sma-1-17064 | NW_003024296.1 | + | 232       | 280       |
| Sma-1-17065 | NS_000200.1    | + | 365462860 | 365462908 |
| Sma-1-17066 | NW_003037822.1 | - | 829159    | 829111    |
| Sma-1-17067 | NS_000200.1    | - | 55137165  | 55137117  |
| Sma-1-17068 | NW_003037906.1 | + | 938155    | 938203    |

|             |                |   |           |           |
|-------------|----------------|---|-----------|-----------|
| Sma-1-17069 | NS.000200.1    | + | 151245934 | 151245982 |
| Sma-1-17070 | NW_003038241.1 | + | 49775     | 49823     |
| Sma-1-17071 | NS.000200.1    | + | 314512480 | 314512528 |
| Sma-1-17072 | NW_003037804.1 | + | 852455    | 852503    |
| Sma-1-17073 | NS.000200.1    | + | 25992475  | 25992523  |
| Sma-1-17074 | NW_003038022.1 | - | 694312    | 694264    |
| Sma-1-17075 | NS.000200.1    | - | 236375154 | 236375106 |
| Sma-1-17076 | NW_003038160.1 | + | 243284    | 243332    |
| Sma-1-17077 | NS.000200.1    | + | 296995215 | 296995263 |
| Sma-1-17078 | NW_003021473.1 | - | 193       | 145       |
| Sma-1-17079 | NW_003037877.1 | + | 165457    | 165505    |
| Sma-1-17080 | NS.000200.1    | + | 121204019 | 121204067 |
| Sma-1-17081 | NS.000200.1    | - | 344137104 | 344137056 |
| Sma-1-17082 | NW_003037796.1 | + | 1095721   | 1095769   |
| Sma-1-17083 | NS.000200.1    | + | 9305365   | 9305413   |
| Sma-1-17084 | NW_003038038.1 | + | 1168124   | 1168172   |
| Sma-1-17085 | NS.000200.1    | + | 253071517 | 253071565 |
| Sma-1-17086 | NW_003037941.1 | + | 91629     | 91677     |
| Sma-1-17087 | NS.000200.1    | + | 184826103 | 184826151 |
| Sma-1-17088 | NW_003037831.1 | - | 1113593   | 1113545   |
| Sma-1-17089 | NS.000200.1    | - | 70562895  | 70562847  |
| Sma-1-17090 | NW_003037893.1 | + | 336637    | 336685    |
| Sma-1-17091 | NS.000200.1    | + | 141450947 | 141450995 |
| Sma-1-17092 | NW_003026468.1 | - | 145074    | 145026    |
| Sma-1-17093 | NS.000200.1    | - | 216339095 | 216339047 |
| Sma-1-17094 | NW_003038038.1 | + | 377443    | 377491    |
| Sma-1-17095 | NS.000200.1    | + | 252280836 | 252280884 |
| Sma-1-17096 | NW_003037901.1 | - | 613513    | 613465    |
| Sma-1-17097 | NS.000200.1    | - | 146461974 | 146461926 |
| Sma-1-17098 | NW_003037891.1 | - | 2053012   | 2052964   |
| Sma-1-17099 | NS.000200.1    | - | 139934290 | 139934242 |
| Sma-1-17100 | NW_003038137.1 | + | 243638    | 243686    |
| Sma-1-17101 | NS.000200.1    | + | 285032534 | 285032582 |
| Sma-1-17102 | NW_003037884.1 | + | 226399    | 226447    |
| Sma-1-17103 | NS.000200.1    | + | 127006064 | 127006112 |
| Sma-1-17104 | NW_003038250.1 | + | 194771    | 194822    |
| Sma-1-17105 | NS.000200.1    | + | 318247448 | 318247499 |
| Sma-1-17106 | NW_003037862.1 | - | 824641    | 824593    |
| Sma-1-17107 | NS.000200.1    | - | 106476302 | 106476254 |
| Sma-1-17108 | NW_003037871.1 | - | 117266    | 117218    |
| Sma-1-17109 | NS.000200.1    | - | 117565004 | 117564956 |
| Sma-1-17110 | NW_003037918.1 | - | 2204168   | 2204120   |
| Sma-1-17111 | NS.000200.1    | - | 168771158 | 168771110 |
| Sma-1-17112 | NW_003037859.1 | - | 894947    | 894899    |
| Sma-1-17113 | NS.000200.1    | - | 103573788 | 103573740 |
| Sma-1-17114 | NW_003037940.1 | + | 806741    | 806789    |
| Sma-1-17115 | NS.000200.1    | + | 184548871 | 184548919 |
| Sma-1-17116 | NW_003037836.1 | - | 1163002   | 1162953   |
| Sma-1-17117 | NS.000200.1    | - | 76720101  | 76720052  |
| Sma-1-17118 | NW_003037879.1 | + | 568846    | 568894    |
| Sma-1-17119 | NS.000200.1    | + | 123571102 | 123571150 |
| Sma-1-17120 | NW_003037819.1 | + | 909600    | 909648    |

|             |                |   |           |           |
|-------------|----------------|---|-----------|-----------|
| Sma-1-17121 | NS_000200.1    | + | 51997865  | 51997913  |
| Sma-1-17122 | NW_003037932.1 | + | 257203    | 257251    |
| Sma-1-17123 | NS_000200.1    | + | 177790399 | 177790447 |
| Sma-1-17124 | NW_003037976.1 | + | 153501    | 153549    |
| Sma-1-17125 | NS_000200.1    | + | 206767816 | 206767864 |
| Sma-1-17126 | NW_003037882.1 | - | 124328    | 124280    |
| Sma-1-17127 | NS_000200.1    | - | 125416002 | 125415954 |
| Sma-1-17128 | NW_003038037.1 | - | 371292    | 371244    |
| Sma-1-17129 | NS_000200.1    | - | 250526701 | 250526653 |
| Sma-1-17130 | NW_003037859.1 | + | 447652    | 447700    |
| Sma-1-17131 | NS_000200.1    | + | 103126493 | 103126541 |
| Sma-1-17132 | NW_003038043.1 | + | 20999     | 21047     |
| Sma-1-17133 | NS_000200.1    | + | 254331041 | 254331089 |
| Sma-1-17134 | NW_003037844.1 | - | 426616    | 426568    |
| Sma-1-17135 | NS_000200.1    | - | 86610062  | 86610014  |
| Sma-1-17136 | NW_003038063.1 | + | 7720      | 7768      |
| Sma-1-17137 | NS_000200.1    | + | 261503998 | 261504046 |
| Sma-1-17138 | NW_003037924.1 | - | 661143    | 661095    |
| Sma-1-17139 | NS_000200.1    | - | 172368101 | 172368053 |
| Sma-1-17140 | NW_003037933.1 | - | 205356    | 205308    |
| Sma-1-17141 | NS_000200.1    | - | 178618528 | 178618480 |
| Sma-1-17142 | NW_003038076.1 | - | 295838    | 295790    |
| Sma-1-17143 | NS_000200.1    | - | 266513012 | 266512964 |
| Sma-1-17144 | NW_003037822.1 | - | 529056    | 529008    |
| Sma-1-17145 | NS_000200.1    | - | 54837062  | 54837014  |
| Sma-1-17146 | NW_003026618.1 | + | 345180    | 345229    |
| Sma-1-17147 | NS_000200.1    | + | 322100182 | 322100231 |
| Sma-1-17148 | NW_003037810.1 | - | 969978    | 969930    |
| Sma-1-17149 | NS_000200.1    | - | 37574500  | 37574452  |
| Sma-1-17150 | NW_003037968.1 | + | 243786    | 243834    |
| Sma-1-17151 | NS_000200.1    | + | 200160956 | 200161004 |
| Sma-1-17152 | NW_003037823.1 | - | 111138    | 111090    |
| Sma-1-17153 | NS_000200.1    | - | 56027757  | 56027709  |
| Sma-1-17154 | NW_003037889.1 | - | 1068495   | 1068447   |
| Sma-1-17155 | NS_000200.1    | - | 134844985 | 134844937 |
| Sma-1-17156 | NW_003037874.1 | - | 58528     | 58480     |
| Sma-1-17157 | NS_000200.1    | - | 119483478 | 119483430 |
| Sma-1-17158 | NW_003038258.1 | + | 184757    | 184805    |
| Sma-1-17159 | NS_000200.1    | + | 322723267 | 322723315 |
| Sma-1-17160 | NW_003037993.1 | + | 280897    | 280945    |
| Sma-1-17161 | NS_000200.1    | + | 218467600 | 218467648 |
| Sma-1-17162 | NW_003038151.1 | + | 233561    | 233609    |
| Sma-1-17163 | NS_000200.1    | + | 292140804 | 292140852 |
| Sma-1-17164 | NW_003038131.1 | - | 60855     | 60807     |
| Sma-1-17165 | NS_000200.1    | - | 282022699 | 282022651 |
| Sma-1-17166 | NW_003037823.1 | - | 138309    | 138261    |
| Sma-1-17167 | NS_000200.1    | - | 56054928  | 56054880  |
| Sma-1-17168 | NW_003037862.1 | + | 247760    | 247811    |
| Sma-1-17169 | NS_000200.1    | + | 105899421 | 105899472 |
| Sma-1-17170 | NW_003038083.1 | + | 238983    | 239031    |
| Sma-1-17171 | NS_000200.1    | + | 270482320 | 270482368 |
| Sma-1-17172 | NW_003032307.1 | + | 165       | 213       |

|             |                |   |           |           |
|-------------|----------------|---|-----------|-----------|
| Sma-1-17173 | NS.000200.1    | + | 358743069 | 358743117 |
| Sma-1-17174 | NW_003037889.1 | - | 1297543   | 1297495   |
| Sma-1-17175 | NS.000200.1    | - | 135074033 | 135073985 |
| Sma-1-17176 | NW_003023016.1 | - | 1684      | 1636      |
| Sma-1-17177 | NS.000200.1    | - | 372064509 | 372064461 |
| Sma-1-17178 | NW_003037917.1 | - | 402824    | 402776    |
| Sma-1-17179 | NS.000200.1    | - | 165439628 | 165439580 |
| Sma-1-17180 | NW_003037961.1 | - | 269190    | 269142    |
| Sma-1-17181 | NS.000200.1    | - | 195893432 | 195893384 |
| Sma-1-17182 | NW_003037925.1 | - | 72156     | 72108     |
| Sma-1-17183 | NS.000200.1    | - | 172474159 | 172474111 |
| Sma-1-17184 | NW_003037841.1 | - | 227451    | 227403    |
| Sma-1-17185 | NS.000200.1    | - | 82838632  | 82838584  |
| Sma-1-17186 | NW_003037796.1 | - | 1739813   | 1739765   |
| Sma-1-17187 | NS.000200.1    | - | 9949457   | 9949409   |
| Sma-1-17188 | NW_003038014.1 | - | 294866    | 294818    |
| Sma-1-17189 | NS.000200.1    | - | 230035555 | 230035507 |
| Sma-1-17190 | NW_003037807.1 | + | 319199    | 319247    |
| Sma-1-17191 | NS.000200.1    | + | 30580715  | 30580763  |
| Sma-1-17192 | NW_003037866.1 | - | 1234199   | 1234151   |
| Sma-1-17193 | NS.000200.1    | - | 112721998 | 112721950 |
| Sma-1-17194 | NW_003026476.1 | - | 107727    | 107679    |
| Sma-1-17195 | NS.000200.1    | - | 253656497 | 253656449 |
| Sma-1-17196 | NW_003037891.1 | + | 1379214   | 1379262   |
| Sma-1-17197 | NS.000200.1    | + | 139260492 | 139260540 |
| Sma-1-17198 | NW_003037896.1 | + | 150003    | 150051    |
| Sma-1-17199 | NS.000200.1    | + | 143070426 | 143070474 |
| Sma-1-17200 | NW_003037854.1 | - | 715034    | 714986    |
| Sma-1-17201 | NS.000200.1    | - | 97619455  | 97619407  |
| Sma-1-17202 | NW_003037868.1 | - | 356675    | 356627    |
| Sma-1-17203 | NS.000200.1    | - | 116328387 | 116328339 |
| Sma-1-17204 | NW_003037971.1 | + | 641294    | 641342    |
| Sma-1-17205 | NS.000200.1    | + | 202263344 | 202263392 |
| Sma-1-17206 | NW_003037916.1 | - | 166683    | 166635    |
| Sma-1-17207 | NS.000200.1    | - | 163360094 | 163360046 |
| Sma-1-17208 | NW_003038020.1 | - | 166843    | 166795    |
| Sma-1-17209 | NS.000200.1    | - | 234134187 | 234134139 |
| Sma-1-17210 | NW_003037788.1 | - | 26051     | 26003     |
| Sma-1-17211 | NS.000200.1    | - | 380473289 | 380473241 |
| Sma-1-17212 | NW_003037977.1 | + | 815505    | 815553    |
| Sma-1-17213 | NS.000200.1    | + | 209101525 | 209101573 |
| Sma-1-17214 | NW_003037918.1 | - | 1895506   | 1895458   |
| Sma-1-17215 | NS.000200.1    | - | 168462496 | 168462448 |
| Sma-1-17216 | NW_003038244.1 | - | 119812    | 119764    |
| Sma-1-17217 | NS.000200.1    | - | 315265017 | 315264969 |
| Sma-1-17218 | NW_003037873.1 | - | 180614    | 180566    |
| Sma-1-17219 | NS.000200.1    | - | 118919742 | 118919694 |
| Sma-1-17220 | NW_003037898.1 | + | 293710    | 293758    |
| Sma-1-17221 | NS.000200.1    | + | 144277532 | 144277580 |
| Sma-1-17222 | NW_003037809.1 | - | 1687526   | 1687478   |
| Sma-1-17223 | NS.000200.1    | - | 35351990  | 35351942  |
| Sma-1-17224 | NW_003037911.1 | + | 282235    | 282283    |

|             |                |   |           |           |
|-------------|----------------|---|-----------|-----------|
| Sma-1-17225 | NS.000200.1    | + | 156069588 | 156069636 |
| Sma-1-17226 | NW_003037798.1 | + | 2700643   | 2700691   |
| Sma-1-17227 | NS.000200.1    | + | 16959801  | 16959849  |
| Sma-1-17228 | NW_003037916.1 | + | 722653    | 722701    |
| Sma-1-17229 | NS.000200.1    | + | 163916064 | 163916112 |
| Sma-1-17230 | NW_003037812.1 | - | 1143456   | 1143408   |
| Sma-1-17231 | NS.000200.1    | - | 40626195  | 40626147  |
| Sma-1-17232 | NW_003037814.1 | - | 1593141   | 1593093   |
| Sma-1-17233 | NS.000200.1    | - | 44577001  | 44576953  |
| Sma-1-17234 | NW_003037826.1 | - | 1184638   | 1184561   |
| Sma-1-17235 | NS.000200.1    | - | 62184154  | 62184077  |
| Sma-1-17236 | NW_003037846.1 | + | 312564    | 312612    |
| Sma-1-17237 | NS.000200.1    | + | 87947134  | 87947182  |
| Sma-1-17238 | NW_003037832.1 | + | 393341    | 393389    |
| Sma-1-17239 | NS.000200.1    | + | 71602772  | 71602820  |
| Sma-1-17240 | NW_003037809.1 | + | 1037021   | 1037069   |
| Sma-1-17241 | NS.000200.1    | + | 34701485  | 34701533  |
| Sma-1-17242 | NW_003030881.1 | - | 2871      | 2823      |
| Sma-1-17243 | NS.000200.1    | - | 370443679 | 370443631 |
| Sma-1-17244 | NW_003037897.1 | - | 115023    | 114975    |
| Sma-1-17245 | NS.000200.1    | - | 143597399 | 143597351 |
| Sma-1-17246 | NW_003037982.1 | + | 1043547   | 1043595   |
| Sma-1-17247 | NS.000200.1    | + | 214702742 | 214702790 |
| Sma-1-17248 | NW_003026464.1 | - | 384881    | 384833    |
| Sma-1-17249 | NS.000200.1    | - | 203685190 | 203685142 |
| Sma-1-17250 | NW_003037800.1 | + | 638891    | 638939    |
| Sma-1-17251 | NS.000200.1    | + | 19268251  | 19268299  |
| Sma-1-17252 | NW_003038003.1 | - | 414438    | 414390    |
| Sma-1-17253 | NS.000200.1    | - | 223913720 | 223913672 |
| Sma-1-17254 | NW_003026472.1 | + | 117204    | 117252    |
| Sma-1-17255 | NS.000200.1    | + | 236529196 | 236529244 |
| Sma-1-17256 | NW_003026464.1 | + | 361565    | 361613    |
| Sma-1-17257 | NS.000200.1    | + | 203661874 | 203661922 |
| Sma-1-17258 | NW_003037826.1 | - | 1606533   | 1606485   |
| Sma-1-17259 | NS.000200.1    | - | 62606049  | 62606001  |
| Sma-1-17260 | NW_003026508.1 | + | 46480     | 46528     |
| Sma-1-17261 | NS.000200.1    | + | 281091094 | 281091142 |
| Sma-1-17262 | NW_003037939.1 | + | 483245    | 483293    |
| Sma-1-17263 | NS.000200.1    | + | 183352999 | 183353047 |
| Sma-1-17264 | NW_003038086.1 | + | 29092     | 29140     |
| Sma-1-17265 | NS.000200.1    | + | 272277685 | 272277733 |
| Sma-1-17266 | NW_003038192.1 | - | 894       | 846       |
| Sma-1-17267 | NS.000200.1    | - | 302562801 | 302562753 |
| Sma-1-17268 | NW_003037917.1 | + | 1274262   | 1274310   |
| Sma-1-17269 | NS.000200.1    | + | 166311066 | 166311114 |
| Sma-1-17270 | NW_003026459.1 | + | 206854    | 206902    |
| Sma-1-17271 | NS.000200.1    | + | 141852127 | 141852175 |
| Sma-1-17272 | NW_003037921.1 | - | 367272    | 367224    |
| Sma-1-17273 | NS.000200.1    | - | 169897407 | 169897359 |
| Sma-1-17274 | NW_003037801.1 | + | 813186    | 813234    |
| Sma-1-17275 | NS.000200.1    | + | 21902666  | 21902714  |
| Sma-1-17276 | NW_003037895.1 | - | 255629    | 255581    |



|             |                |   |           |           |
|-------------|----------------|---|-----------|-----------|
| Sma-1-17277 | NS.000200.1    | - | 142701831 | 142701783 |
| Sma-1-17278 | NW_003037796.1 | - | 280229    | 280181    |
| Sma-1-17279 | NS.000200.1    | - | 8489873   | 8489825   |
| Sma-1-17280 | NW_003037795.1 | - | 287906    | 287858    |
| Sma-1-17281 | NS.000200.1    | - | 6678789   | 6678741   |
| Sma-1-17282 | NW_003037795.1 | - | 990302    | 990254    |
| Sma-1-17283 | NS.000200.1    | - | 7381185   | 7381137   |
| Sma-1-17284 | NW_003037932.1 | - | 666573    | 666525    |
| Sma-1-17285 | NS.000200.1    | - | 178199769 | 178199721 |
| Sma-1-17286 | NW_003037844.1 | - | 225222    | 225174    |
| Sma-1-17287 | NS.000200.1    | - | 86408668  | 86408620  |
| Sma-1-17288 | NW_003037939.1 | + | 411423    | 411471    |
| Sma-1-17289 | NS.000200.1    | + | 183281177 | 183281225 |
| Sma-1-17290 | NW_003032670.1 | - | 370       | 322       |
| Sma-1-17291 | NW_003037798.1 | - | 1315680   | 1315632   |
| Sma-1-17292 | NS.000200.1    | - | 350591469 | 350591421 |
| Sma-1-17293 | NS.000200.1    | - | 15574838  | 15574790  |
| Sma-1-17294 | NW_003038081.1 | - | 258249    | 258201    |
| Sma-1-17295 | NS.000200.1    | - | 269420292 | 269420244 |
| Sma-1-17296 | NW_003037975.1 | + | 959721    | 959769    |
| Sma-1-17297 | NS.000200.1    | + | 206541945 | 206541993 |
| Sma-1-17298 | NW_003037867.1 | + | 131905    | 131953    |
| Sma-1-17299 | NS.000200.1    | + | 115732724 | 115732772 |
| Sma-1-17300 | NW_003038130.1 | + | 99737     | 99786     |
| Sma-1-17301 | NS.000200.1    | + | 281654723 | 281654772 |
| Sma-1-17302 | NW_003038246.1 | + | 215391    | 215439    |
| Sma-1-17303 | NS.000200.1    | + | 315856519 | 315856567 |
| Sma-1-17304 | NW_003037803.1 | + | 204614    | 204662    |
| Sma-1-17305 | NS.000200.1    | + | 23705151  | 23705199  |
| Sma-1-17306 | NW_003037972.1 | + | 486417    | 486466    |
| Sma-1-17307 | NS.000200.1    | + | 202962121 | 202962170 |
| Sma-1-17308 | NW_003038010.1 | - | 186677    | 186626    |
| Sma-1-17309 | NS.000200.1    | - | 227004900 | 227004849 |
| Sma-1-17310 | NW_003026471.1 | - | 353422    | 353371    |
| Sma-1-17311 | NS.000200.1    | - | 222465655 | 222465604 |
| Sma-1-17312 | NW_003037953.1 | + | 163504    | 163555    |
| Sma-1-17313 | NS.000200.1    | + | 193076555 | 193076606 |
| Sma-1-17314 | NW_003037809.1 | - | 1923208   | 1923157   |
| Sma-1-17315 | NS.000200.1    | - | 35587672  | 35587621  |
| Sma-1-17316 | NW_003038033.1 | - | 903429    | 903381    |
| Sma-1-17317 | NS.000200.1    | - | 246883431 | 246883383 |
| Sma-1-17318 | NW_003037819.1 | - | 1019612   | 1019564   |
| Sma-1-17319 | NS.000200.1    | - | 52107877  | 52107829  |
| Sma-1-17320 | NW_003037962.1 | - | 10552     | 10504     |
| Sma-1-17321 | NS.000200.1    | - | 196087395 | 196087347 |
| Sma-1-17322 | NW_003037797.1 | - | 296122    | 296074    |
| Sma-1-17323 | NS.000200.1    | - | 10723982  | 10723934  |
| Sma-1-17324 | NW_003037901.1 | - | 864740    | 864692    |
| Sma-1-17325 | NS.000200.1    | - | 146713201 | 146713153 |
| Sma-1-17326 | NW_003037844.1 | - | 402502    | 402454    |
| Sma-1-17327 | NS.000200.1    | - | 86585948  | 86585900  |
| Sma-1-17328 | NW_003033827.1 | + | 1423      | 1471      |

|             |                |   |           |           |
|-------------|----------------|---|-----------|-----------|
| Sma-1-17329 | NS.000200.1    | + | 359198569 | 359198617 |
| Sma-1-17330 | NW_003038034.1 | + | 352681    | 352729    |
| Sma-1-17331 | NS.000200.1    | + | 247294437 | 247294485 |
| Sma-1-17332 | NW_003037918.1 | + | 2084257   | 2084305   |
| Sma-1-17333 | NS.000200.1    | + | 168651247 | 168651295 |
| Sma-1-17334 | NW_003037915.1 | + | 208551    | 208602    |
| Sma-1-17335 | NS.000200.1    | + | 162108537 | 162108588 |
| Sma-1-17336 | NW_003037865.1 | - | 493953    | 493905    |
| Sma-1-17337 | NS.000200.1    | - | 110915872 | 110915824 |
| Sma-1-17338 | NW_003037910.1 | - | 69577     | 69529     |
| Sma-1-17339 | NS.000200.1    | - | 154581552 | 154581504 |
| Sma-1-17340 | NW_003037886.1 | - | 410260    | 410212    |
| Sma-1-17341 | NS.000200.1    | - | 129665827 | 129665779 |
| Sma-1-17342 | NW_003037889.1 | + | 191386    | 191434    |
| Sma-1-17343 | NS.000200.1    | + | 133967876 | 133967924 |
| Sma-1-17344 | NW_003038212.1 | - | 3137      | 3089      |
| Sma-1-17345 | NS.000200.1    | - | 306167028 | 306166980 |
| Sma-1-17346 | NW_003037852.1 | - | 501804    | 501756    |
| Sma-1-17347 | NS.000200.1    | - | 94893699  | 94893651  |
| Sma-1-17348 | NW_003037886.1 | + | 449647    | 449695    |
| Sma-1-17349 | NS.000200.1    | + | 129705214 | 129705262 |
| Sma-1-17350 | NW_003038025.1 | + | 237257    | 237305    |
| Sma-1-17351 | NS.000200.1    | + | 239095502 | 239095550 |
| Sma-1-17352 | NW_003037865.1 | + | 280655    | 280703    |
| Sma-1-17353 | NS.000200.1    | + | 110702574 | 110702622 |
| Sma-1-17354 | NW_003037890.1 | - | 440241    | 440193    |
| Sma-1-17355 | NS.000200.1    | - | 136123602 | 136123554 |
| Sma-1-17356 | NW_003038063.1 | + | 36965     | 37013     |
| Sma-1-17357 | NS.000200.1    | + | 261533243 | 261533291 |
| Sma-1-17358 | NW_003037824.1 | + | 895468    | 895516    |
| Sma-1-17359 | NS.000200.1    | + | 57826408  | 57826456  |
| Sma-1-17360 | NW_003037827.1 | + | 2336121   | 2336169   |
| Sma-1-17361 | NS.000200.1    | + | 64958262  | 64958310  |
| Sma-1-17362 | NW_003026507.1 | - | 303108    | 303060    |
| Sma-1-17363 | NS.000200.1    | - | 279963259 | 279963211 |
| Sma-1-17364 | NW_003037908.1 | + | 1000951   | 1000999   |
| Sma-1-17365 | NS.000200.1    | + | 153474082 | 153474130 |
| Sma-1-17366 | NW_003037795.1 | + | 309652    | 309700    |
| Sma-1-17367 | NS.000200.1    | + | 6700535   | 6700583   |
| Sma-1-17368 | NW_003037821.1 | + | 867706    | 867754    |
| Sma-1-17369 | NS.000200.1    | + | 54012190  | 54012238  |
| Sma-1-17370 | NW_003037804.1 | - | 1351524   | 1351476   |
| Sma-1-17371 | NS.000200.1    | - | 26491544  | 26491496  |
| Sma-1-17372 | NW_003026465.1 | - | 700058    | 700010    |
| Sma-1-17373 | NS.000200.1    | - | 208092652 | 208092604 |
| Sma-1-17374 | NW_003026465.1 | + | 702926    | 702974    |
| Sma-1-17375 | NS.000200.1    | + | 208095520 | 208095568 |
| Sma-1-17376 | NW_003038025.1 | + | 11144     | 11192     |
| Sma-1-17377 | NS.000200.1    | + | 238869389 | 238869437 |
| Sma-1-17378 | NW_003038049.1 | + | 229709    | 229757    |
| Sma-1-17379 | NS.000200.1    | + | 256205236 | 256205284 |
| Sma-1-17380 | NW_003037821.1 | - | 445542    | 445494    |

|             |                |   |           |           |
|-------------|----------------|---|-----------|-----------|
| Sma-1-17381 | NS_000200.1    | - | 53590026  | 53589978  |
| Sma-1-17382 | NW_003038032.1 | - | 604935    | 604887    |
| Sma-1-17383 | NS_000200.1    | - | 245764095 | 245764047 |
| Sma-1-17384 | NW_003038014.1 | + | 120658    | 120706    |
| Sma-1-17385 | NS_000200.1    | + | 229861347 | 229861395 |
| Sma-1-17386 | NW_003037981.1 | + | 1253624   | 1253672   |
| Sma-1-17387 | NS_000200.1    | + | 213651492 | 213651540 |
| env-88      | AF036395.1     | + | 119       | 163       |
| Sma-1-17388 | NW_003037951.1 | - | 125660    | 125612    |
| Sma-1-17389 | NS_000200.1    | - | 192803385 | 192803337 |
| Sma-1-17390 | NW_003038070.1 | - | 458837    | 458789    |
| Sma-1-17391 | NS_000200.1    | - | 264796078 | 264796030 |
| Sma-1-17392 | NW_003037866.1 | + | 1035105   | 1035153   |
| Sma-1-17393 | NS_000200.1    | + | 112522904 | 112522952 |
| Sma-1-17394 | NW_003037953.1 | - | 255576    | 255528    |
| Sma-1-17395 | NS_000200.1    | - | 193168627 | 193168579 |
| Sma-1-17396 | NW_003037810.1 | - | 1267722   | 1267674   |
| Sma-1-17397 | NS_000200.1    | - | 37872244  | 37872196  |
| Sma-1-17398 | NW_003026484.1 | - | 17057     | 17009     |
| Sma-1-17399 | NS_000200.1    | - | 256979748 | 256979700 |
| Sma-1-17400 | NW_003037827.1 | - | 1085837   | 1085789   |
| Sma-1-17401 | NS_000200.1    | - | 63707978  | 63707930  |
| Sma-1-17402 | NW_003038129.1 | + | 235231    | 235279    |
| Sma-1-17403 | NS_000200.1    | + | 281488578 | 281488626 |
| Sma-1-17404 | NW_003037795.1 | - | 309545    | 309497    |
| Sma-1-17405 | NS_000200.1    | - | 6700428   | 6700380   |
| Sma-1-17406 | NW_003037841.1 | - | 1306395   | 1306347   |
| Sma-1-17407 | NS_000200.1    | - | 83917576  | 83917528  |
| Sma-1-17408 | NW_003037796.1 | + | 1521294   | 1521342   |
| Sma-1-17409 | NS_000200.1    | + | 9730938   | 9730986   |
| Sma-1-17410 | NW_003037795.1 | - | 1219095   | 1219047   |
| Sma-1-17411 | NS_000200.1    | - | 7609978   | 7609930   |
| Sma-1-17412 | NW_003037824.1 | + | 950672    | 950720    |
| Sma-1-17413 | NS_000200.1    | + | 57881612  | 57881660  |
| Sma-1-17414 | NW_003020123.1 | - | 148       | 100       |
| Sma-1-17415 | NW_003038254.1 | + | 221891    | 221939    |
| Sma-1-17416 | NS_000200.1    | + | 320257449 | 320257497 |
| Sma-1-17417 | NS_000200.1    | - | 371047871 | 371047823 |
| Sma-1-17418 | NW_003037829.1 | + | 924112    | 924160    |
| Sma-1-17419 | NS_000200.1    | + | 66824650  | 66824698  |
| Sma-1-17420 | NW_003038007.1 | + | 251370    | 251418    |
| Sma-1-17421 | NS_000200.1    | + | 225499925 | 225499973 |
| Sma-1-17422 | NW_003026483.1 | + | 110944    | 110992    |
| Sma-1-17423 | NS_000200.1    | + | 256625468 | 256625516 |
| Sma-1-17424 | NW_003038260.1 | - | 367351    | 367303    |
| Sma-1-17425 | NS_000200.1    | - | 323539126 | 323539078 |
| Sma-1-17426 | NW_003037867.1 | - | 252909    | 252861    |
| Sma-1-17427 | NS_000200.1    | - | 115853728 | 115853680 |
| Sma-1-17428 | NW_003038518.1 | + | 640160    | 640208    |
| Sma-1-17429 | NS_000200.1    | + | 342276993 | 342277041 |
| Sma-1-17430 | NW_003037945.1 | - | 821449    | 821401    |
| Sma-1-17431 | NS_000200.1    | - | 189923413 | 189923365 |

|             |                |   |           |           |
|-------------|----------------|---|-----------|-----------|
| Sma-1-17432 | NW_003037800.1 | - | 2251075   | 2251027   |
| Sma-1-17433 | NS_000200.1    | - | 20880435  | 20880387  |
| Sma-1-17434 | NW_003026482.1 | + | 136211    | 136259    |
| Sma-1-17435 | NS_000200.1    | + | 255923957 | 255924005 |
| Sma-1-17436 | NW_003038032.1 | + | 225181    | 225229    |
| Sma-1-17437 | NS_000200.1    | + | 245384341 | 245384389 |
| Sma-1-17438 | NW_003037846.1 | - | 662616    | 662568    |
| Sma-1-17439 | NS_000200.1    | - | 88297186  | 88297138  |
| Sma-1-17440 | NW_003037793.1 | - | 3513656   | 3513608   |
| Sma-1-17441 | NS_000200.1    | - | 3513656   | 3513608   |
| Sma-1-17442 | NW_003038074.1 | + | 106769    | 106817    |
| Sma-1-17443 | NS_000200.1    | + | 265998149 | 265998197 |
| Sma-1-17444 | NW_003035602.1 | + | 8265      | 8313      |
| Sma-1-17445 | NS_000200.1    | + | 329347459 | 329347507 |
| Sma-1-17446 | NW_003037859.1 | + | 542156    | 542204    |
| Sma-1-17447 | NS_000200.1    | + | 103220997 | 103221045 |
| Sma-1-17448 | NW_003038007.1 | - | 122161    | 122078    |
| Sma-1-17449 | NS_000200.1    | - | 225370716 | 225370633 |
| Sma-1-17450 | NW_003038025.1 | + | 559506    | 559554    |
| Sma-1-17451 | NS_000200.1    | + | 239417751 | 239417799 |
| Sma-1-17452 | NW_003038033.1 | + | 838300    | 838348    |
| Sma-1-17453 | NS_000200.1    | + | 246818302 | 246818350 |
| Sma-1-17454 | NW_003037830.1 | + | 1383440   | 1383488   |
| Sma-1-17455 | NS_000200.1    | + | 69273811  | 69273859  |
| Sma-1-17456 | NW_003037945.1 | + | 1567543   | 1567591   |
| Sma-1-17457 | NS_000200.1    | + | 190669507 | 190669555 |
| Sma-1-17458 | NW_003038261.1 | - | 191601    | 191553    |
| Sma-1-17459 | NS_000200.1    | - | 323805252 | 323805204 |
| Sma-1-17460 | NW_003038033.1 | + | 91411     | 91459     |
| Sma-1-17461 | NS_000200.1    | + | 246071413 | 246071461 |
| Sma-1-17462 | NW_003037820.1 | - | 27040     | 26992     |
| Sma-1-17463 | NS_000200.1    | - | 52300022  | 52299974  |
| Sma-1-17464 | NW_003037820.1 | + | 268425    | 268473    |
| Sma-1-17465 | NS_000200.1    | + | 52541407  | 52541455  |
| Sma-1-17466 | NW_003038006.1 | + | 124897    | 124945    |
| Sma-1-17467 | NS_000200.1    | + | 225009381 | 225009429 |
| Sma-1-17468 | NW_003038005.1 | + | 463622    | 463670    |
| Sma-1-17469 | NS_000200.1    | + | 224869576 | 224869624 |
| Sma-1-17470 | NW_003037809.1 | - | 2193593   | 2193545   |
| Sma-1-17471 | NS_000200.1    | - | 35858057  | 35858009  |
| Sma-1-17472 | NW_003037800.1 | + | 750410    | 750458    |
| Sma-1-17473 | NS_000200.1    | + | 19379770  | 19379818  |
| Sma-1-17474 | NW_003037798.1 | - | 1364277   | 1364229   |
| Sma-1-17475 | NS_000200.1    | - | 15623435  | 15623387  |
| Sma-1-17476 | NW_003037797.1 | + | 3791675   | 3791723   |
| Sma-1-17477 | NS_000200.1    | + | 14219535  | 14219583  |
| Sma-1-17478 | NW_003029633.1 | - | 781       | 733       |
| Sma-1-17479 | NS_000200.1    | - | 366303473 | 366303425 |
| Sma-1-17480 | NW_003037881.1 | + | 456279    | 456327    |
| Sma-1-17481 | NS_000200.1    | + | 124888070 | 124888118 |
| Sma-1-17482 | NW_003037886.1 | + | 1083099   | 1083147   |
| Sma-1-17483 | NS_000200.1    | + | 130338666 | 130338714 |

|             |                |   |           |           |
|-------------|----------------|---|-----------|-----------|
| Sma-1-17484 | NW_003038063.1 | + | 232727    | 232775    |
| Sma-1-17485 | NS_000200.1    | + | 261729005 | 261729053 |
| Sma-1-17486 | NW_003037898.1 | + | 427698    | 427746    |
| Sma-1-17487 | NS_000200.1    | + | 144411520 | 144411568 |
| Sma-1-17488 | NW_003037864.1 | + | 1629348   | 1629396   |
| Sma-1-17489 | NS_000200.1    | + | 110121922 | 110121970 |
| Sma-1-17490 | NW_003037918.1 | + | 1665243   | 1665291   |
| Sma-1-17491 | NS_000200.1    | + | 168232233 | 168232281 |
| Sma-1-17492 | NW_003038258.1 | + | 114473    | 114521    |
| Sma-1-17493 | NS_000200.1    | + | 322652983 | 322653031 |
| Sma-1-17494 | NW_003038505.1 | + | 223154    | 223202    |
| Sma-1-17495 | NS_000200.1    | + | 336302491 | 336302539 |
| Sma-1-17496 | NW_003026462.1 | + | 288476    | 288524    |
| Sma-1-17497 | NS_000200.1    | + | 196955979 | 196956027 |
| Sma-1-17498 | NW_003037820.1 | + | 223975    | 224023    |
| Sma-1-17499 | NS_000200.1    | + | 52496957  | 52497005  |
| Sma-1-17500 | NW_003038153.1 | + | 550185    | 550233    |
| Sma-1-17501 | NS_000200.1    | + | 293612234 | 293612282 |
| Sma-1-17502 | NW_003038024.1 | + | 725381    | 725429    |
| Sma-1-17503 | NS_000200.1    | + | 238622410 | 238622458 |
| Sma-1-17504 | NW_003037846.1 | - | 789372    | 789324    |
| Sma-1-17505 | NS_000200.1    | - | 88423942  | 88423894  |
| Sma-1-17506 | NW_003026546.1 | + | 1402      | 1450      |
| Sma-1-17507 | NS_000200.1    | + | 300481907 | 300481955 |
| Sma-1-17508 | NW_003038005.1 | - | 384320    | 384272    |
| Sma-1-17509 | NS_000200.1    | - | 224790274 | 224790226 |
| Sma-1-17510 | NW_003038085.1 | + | 380334    | 380382    |
| Sma-1-17511 | NS_000200.1    | + | 272070427 | 272070475 |
| Sma-1-17512 | NW_003037794.1 | + | 911460    | 911508    |
| Sma-1-17513 | NS_000200.1    | + | 5091055   | 5091103   |
| Sma-1-17514 | NW_003038252.1 | - | 432658    | 432610    |
| Sma-1-17515 | NS_000200.1    | - | 319288246 | 319288198 |
| Sma-1-17516 | NW_003038085.1 | - | 510903    | 510855    |
| Sma-1-17517 | NS_000200.1    | - | 272200996 | 272200948 |
| Sma-1-17518 | NW_003037793.1 | - | 979478    | 979430    |
| Sma-1-17519 | NW_003037814.1 | + | 953949    | 953997    |
| Sma-1-17520 | NW_003038023.1 | - | 285632    | 285584    |
| Sma-1-17521 | NS_000200.1    | + | 43937809  | 43937857  |
| Sma-1-17522 | NS_000200.1    | - | 237445923 | 237445875 |
| Sma-1-17523 | NS_000200.1    | - | 979478    | 979430    |
| Sma-1-17524 | NW_003037902.1 | - | 517103    | 517055    |
| Sma-1-17525 | NS_000200.1    | - | 147272337 | 147272289 |
| Sma-1-17526 | NW_003038015.1 | + | 528551    | 528599    |
| Sma-1-17527 | NS_000200.1    | + | 230852041 | 230852089 |
| Sma-1-17528 | NW_003025194.1 | - | 1456      | 1407      |
| Sma-1-17529 | NS_000200.1    | - | 361375104 | 361375055 |
| Sma-1-17530 | NW_003037915.1 | - | 269624    | 269576    |
| Sma-1-17531 | NS_000200.1    | - | 162169610 | 162169562 |
| Sma-1-17532 | NW_003038252.1 | - | 396803    | 396755    |
| Sma-1-17533 | NS_000200.1    | - | 319252391 | 319252343 |
| Sma-1-17534 | NW_003026472.1 | - | 408567    | 408519    |
| Sma-1-17535 | NS_000200.1    | - | 236820559 | 236820511 |

|             |                |   |           |           |
|-------------|----------------|---|-----------|-----------|
| Sma-1-17536 | NW_003037910.1 | - | 1110653   | 1110605   |
| Sma-1-17537 | NS_000200.1    | - | 155622628 | 155622580 |
| Sma-1-17538 | NW_003037839.1 | - | 641288    | 641240    |
| Sma-1-17539 | NS_000200.1    | - | 79599438  | 79599390  |
| Sma-1-17540 | NW_003037906.1 | - | 126243    | 126195    |
| Sma-1-17541 | NS_000200.1    | - | 150434022 | 150433974 |
| Sma-1-17542 | NW_003038030.1 | + | 778802    | 778850    |
| Sma-1-17543 | NS_000200.1    | + | 243914669 | 243914717 |
| Sma-1-17544 | NW_003037906.1 | - | 105150    | 105102    |
| Sma-1-17545 | NS_000200.1    | - | 150412929 | 150412881 |
| Sma-1-17546 | NW_003037827.1 | - | 221010    | 220962    |
| Sma-1-17547 | NS_000200.1    | - | 62843151  | 62843103  |
| Sma-1-17548 | NW_003038086.1 | + | 289299    | 289347    |
| Sma-1-17549 | NS_000200.1    | + | 272537892 | 272537940 |
| Sma-1-17550 | NW_003037908.1 | + | 1046899   | 1046947   |
| Sma-1-17551 | NS_000200.1    | + | 153520030 | 153520078 |
| Sma-1-17552 | NW_003037885.1 | + | 1143306   | 1143354   |
| Sma-1-17553 | NS_000200.1    | + | 129241253 | 129241301 |
| Sma-1-17554 | NW_003037908.1 | - | 1031017   | 1030969   |
| Sma-1-17555 | NS_000200.1    | - | 153504148 | 153504100 |
| Sma-1-17556 | NW_003038086.1 | - | 362572    | 362524    |
| Sma-1-17557 | NS_000200.1    | - | 272611165 | 272611117 |
| Sma-1-17558 | NW_003026609.1 | - | 81137     | 81089     |
| Sma-1-17559 | NS_000200.1    | - | 309736129 | 309736081 |
| Sma-1-17560 | NW_003037886.1 | - | 980054    | 980006    |
| Sma-1-17561 | NS_000200.1    | - | 130235621 | 130235573 |
| Sma-1-17562 | NW_003037891.1 | + | 433785    | 433833    |
| Sma-1-17563 | NS_000200.1    | + | 138315063 | 138315111 |
| Sma-1-17564 | NW_003038003.1 | - | 229649    | 229601    |
| Sma-1-17565 | NS_000200.1    | - | 223728931 | 223728883 |
| Sma-1-17566 | NW_003037796.1 | + | 1767386   | 1767434   |
| Sma-1-17567 | NS_000200.1    | + | 9977030   | 9977078   |
| Sma-1-17568 | NW_003037932.1 | + | 692399    | 692447    |
| Sma-1-17569 | NS_000200.1    | + | 178225595 | 178225643 |
| Sma-1-17570 | NW_003022225.1 | + | 321       | 369       |
| Sma-1-17571 | NS_000200.1    | + | 360961686 | 360961734 |
| Sma-1-17572 | NW_003035880.1 | - | 27319     | 27271     |
| Sma-1-17573 | NS_000200.1    | - | 339268383 | 339268335 |
| Sma-1-17574 | NW_003037829.1 | + | 692890    | 692938    |
| Sma-1-17575 | NS_000200.1    | + | 66593428  | 66593476  |
| Sma-1-17576 | NW_003026610.1 | + | 103557    | 103605    |
| Sma-1-17577 | NS_000200.1    | + | 310258927 | 310258975 |
| Sma-1-17578 | NW_003037873.1 | - | 589469    | 589421    |
| Sma-1-17579 | NS_000200.1    | - | 119328597 | 119328549 |
| Sma-1-17580 | NW_003037861.1 | + | 647233    | 647281    |
| Sma-1-17581 | NS_000200.1    | + | 105423687 | 105423735 |
| Sma-1-17582 | NW_003037838.1 | + | 751205    | 751253    |
| Sma-1-17583 | NS_000200.1    | + | 78749768  | 78749816  |
| Sma-1-17584 | NW_003037854.1 | - | 1773820   | 1773772   |
| Sma-1-17585 | NS_000200.1    | - | 98678241  | 98678193  |
| Sma-1-17586 | NW_003038414.1 | - | 43693     | 43645     |
| Sma-1-17587 | NS_000200.1    | - | 328760713 | 328760665 |

|             |                |   |           |           |
|-------------|----------------|---|-----------|-----------|
| Sma-1-17588 | NW_003037793.1 | - | 3536543   | 3536495   |
| Sma-1-17589 | NS_000200.1    | - | 3536543   | 3536495   |
| Sma-1-17590 | NW_003035881.1 | + | 187982    | 188030    |
| Sma-1-17591 | NS_000200.1    | + | 341252187 | 341252235 |
| Sma-1-17592 | NW_003037845.1 | - | 28672     | 28624     |
| Sma-1-17593 | NS_000200.1    | - | 87030575  | 87030527  |
| Sma-1-17594 | NW_003037915.1 | + | 220429    | 220480    |
| Sma-1-17595 | NS_000200.1    | + | 162120415 | 162120466 |
| Sma-1-17596 | NW_003039127.1 | + | 202213    | 202261    |
| Sma-1-17597 | NS_000200.1    | + | 113279712 | 113279760 |
| Sma-1-17598 | NW_003037797.1 | + | 624300    | 624348    |
| Sma-1-17599 | NS_000200.1    | + | 11052160  | 11052208  |
| Sma-1-17600 | NW_003026488.1 | + | 267486    | 267534    |
| Sma-1-17601 | NS_000200.1    | + | 263773980 | 263774028 |
| Sma-1-17602 | NW_003038124.1 | + | 217214    | 217262    |
| Sma-1-17603 | NS_000200.1    | + | 279209858 | 279209906 |
| Sma-1-17604 | NW_003037884.1 | - | 959447    | 959399    |
| Sma-1-17605 | NS_000200.1    | - | 127739112 | 127739064 |
| Sma-1-17606 | NW_003037873.1 | + | 78342     | 78390     |
| Sma-1-17607 | NS_000200.1    | + | 118817470 | 118817518 |
| Sma-1-17608 | NW_003037847.1 | - | 31516     | 31468     |
| Sma-1-17609 | NS_000200.1    | - | 88683246  | 88683198  |
| Sma-1-17610 | NW_003037934.1 | + | 194419    | 194467    |
| Sma-1-17611 | NS_000200.1    | + | 179241166 | 179241214 |
| Sma-1-17612 | NW_003037863.1 | - | 519042    | 518994    |
| Sma-1-17613 | NS_000200.1    | - | 107277409 | 107277361 |
| Sma-1-17614 | NW_003037979.1 | - | 273067    | 273019    |
| Sma-1-17615 | NS_000200.1    | - | 210334087 | 210334039 |
| Sma-1-17616 | NW_003037874.1 | - | 135989    | 135941    |
| Sma-1-17617 | NS_000200.1    | - | 119560939 | 119560891 |
| Sma-1-17618 | NW_003037968.1 | + | 12942     | 12990     |
| Sma-1-17619 | NS_000200.1    | + | 199930112 | 199930160 |
| Sma-1-17620 | NW_003037915.1 | + | 1159037   | 1159088   |
| Sma-1-17621 | NS_000200.1    | + | 163059023 | 163059074 |
| Sma-1-17622 | NW_003038016.1 | - | 314249    | 314201    |
| Sma-1-17623 | NS_000200.1    | - | 231430786 | 231430738 |
| Sma-1-17624 | NW_003038037.1 | + | 1593656   | 1593704   |
| Sma-1-17625 | NS_000200.1    | + | 251749065 | 251749113 |
| Sma-1-17626 | NW_003037943.1 | + | 537641    | 537690    |
| Sma-1-17627 | NS_000200.1    | + | 187559174 | 187559223 |
| Sma-1-17628 | NW_003037900.1 | + | 38659     | 38707     |
| Sma-1-17629 | NS_000200.1    | + | 145167525 | 145167573 |
| Sma-1-17630 | NW_003035890.1 | - | 10745     | 10697     |
| Sma-1-17631 | NS_000200.1    | - | 342867243 | 342867195 |
| Sma-1-17632 | NW_003037884.1 | + | 839937    | 839985    |
| Sma-1-17633 | NS_000200.1    | + | 127619602 | 127619650 |
| Sma-1-17634 | NW_003037979.1 | - | 457164    | 457116    |
| Sma-1-17635 | NS_000200.1    | - | 210518184 | 210518136 |
| Sma-1-17636 | NW_003038119.1 | + | 222517    | 222565    |
| Sma-1-17637 | NS_000200.1    | + | 278130073 | 278130121 |
| Sma-1-17638 | NW_003037848.1 | - | 158971    | 158923    |
| Sma-1-17639 | NS_000200.1    | - | 89852042  | 89851994  |

|             |                |   |           |           |
|-------------|----------------|---|-----------|-----------|
| Sma-1-17640 | NW_003023739.1 | - | 859       | 811       |
| Sma-1-17641 | NS_000200.1    | - | 368728525 | 368728477 |
| Sma-1-17642 | NW_003037942.1 | - | 952585    | 952536    |
| Sma-1-17643 | NS_000200.1    | - | 186712493 | 186712444 |
| Sma-1-17644 | NW_003038023.1 | + | 562709    | 562757    |
| Sma-1-17645 | NS_000200.1    | + | 237723000 | 237723048 |
| Sma-1-17646 | NW_003026470.1 | - | 332424    | 332376    |
| Sma-1-17647 | NS_000200.1    | - | 219456393 | 219456345 |
| Sma-1-17648 | NW_003037884.1 | - | 1301726   | 1301678   |
| Sma-1-17649 | NS_000200.1    | - | 128081391 | 128081343 |
| Sma-1-17650 | NW_003037806.1 | - | 1615055   | 1615007   |
| Sma-1-17651 | NS_000200.1    | - | 29810269  | 29810221  |
| Sma-1-17652 | NW_003037818.1 | - | 721788    | 721740    |
| Sma-1-17653 | NS_000200.1    | - | 49437195  | 49437147  |
| Sma-1-17654 | NW_003037814.1 | + | 2138963   | 2139011   |
| Sma-1-17655 | NS_000200.1    | + | 45122823  | 45122871  |
| Sma-1-17656 | NW_003037793.1 | - | 2764524   | 2764476   |
| Sma-1-17657 | NS_000200.1    | - | 2764524   | 2764476   |
| Sma-1-17658 | NW_003037858.1 | - | 798375    | 798327    |
| Sma-1-17659 | NS_000200.1    | - | 101462651 | 101462603 |
| Sma-1-17660 | NW_003037969.1 | - | 193372    | 193324    |
| Sma-1-17661 | NS_000200.1    | - | 200799499 | 200799451 |
| Sma-1-17662 | NW_003024185.1 | + | 769       | 817       |
| Sma-1-17663 | NS_000200.1    | + | 348522203 | 348522251 |
| Sma-1-17664 | NW_003038037.1 | - | 996118    | 996069    |
| Sma-1-17665 | NS_000200.1    | - | 251151527 | 251151478 |
| Sma-1-17666 | NW_003026470.1 | - | 127025    | 126977    |
| Sma-1-17667 | NS_000200.1    | - | 219250994 | 219250946 |
| Sma-1-17668 | NW_003037818.1 | - | 554938    | 554890    |
| Sma-1-17669 | NS_000200.1    | - | 49270345  | 49270297  |
| Sma-1-17670 | NW_003026469.1 | + | 16050     | 16098     |
| Sma-1-17671 | NS_000200.1    | + | 217637709 | 217637757 |
| Sma-1-17672 | NW_003037961.1 | + | 372952    | 373000    |
| Sma-1-17673 | NS_000200.1    | + | 195997194 | 195997242 |
| Sma-1-17674 | NW_003036859.1 | - | 2782      | 2734      |
| Sma-1-17675 | NS_000200.1    | - | 347862624 | 347862576 |
| Sma-1-17676 | NW_003037977.1 | + | 494721    | 494769    |
| Sma-1-17677 | NS_000200.1    | + | 208780741 | 208780789 |
| Sma-1-17678 | NW_003038157.1 | + | 619663    | 619711    |
| Sma-1-17679 | NS_000200.1    | + | 295870583 | 295870631 |
| Sma-1-17680 | NW_003037996.1 | - | 505018    | 504970    |
| Sma-1-17681 | NS_000200.1    | - | 220749894 | 220749846 |
| Sma-1-17682 | NW_003037793.1 | + | 950533    | 950581    |
| Sma-1-17683 | NS_000200.1    | + | 950533    | 950581    |
| Sma-1-17684 | NW_003037918.1 | + | 539752    | 539800    |
| Sma-1-17685 | NS_000200.1    | + | 167106742 | 167106790 |
| Sma-1-17686 | NW_003037806.1 | + | 1477930   | 1477978   |
| Sma-1-17687 | NS_000200.1    | + | 29673144  | 29673192  |
| Sma-1-17688 | NW_003037909.1 | + | 220385    | 220433    |
| Sma-1-17689 | NS_000200.1    | + | 153762034 | 153762082 |
| Sma-1-17690 | NW_003037826.1 | + | 555851    | 555899    |
| Sma-1-17691 | NS_000200.1    | + | 61555367  | 61555415  |



|             |                |   |           |           |
|-------------|----------------|---|-----------|-----------|
| Sma-1-17692 | NW_003038038.1 | - | 113983    | 113935    |
| Sma-1-17693 | NS_000200.1    | - | 252017376 | 252017328 |
| Sma-1-17694 | NW_003037877.1 | + | 728009    | 728057    |
| Sma-1-17695 | NS_000200.1    | + | 121766571 | 121766619 |
| Sma-1-17696 | NW_003037794.1 | - | 580326    | 580278    |
| Sma-1-17697 | NS_000200.1    | - | 4759921   | 4759873   |
| Sma-1-17698 | NW_003037878.1 | + | 237595    | 237643    |
| Sma-1-17699 | NS_000200.1    | + | 122291073 | 122291121 |
| Sma-1-17700 | NW_003037793.1 | - | 3807648   | 3807600   |
| Sma-1-17701 | NS_000200.1    | - | 3807648   | 3807600   |
| Sma-1-17702 | NW_003038028.1 | + | 726825    | 726873    |
| Sma-1-17703 | NS_000200.1    | + | 242034399 | 242034447 |
| Sma-1-17704 | NW_003037941.1 | + | 915728    | 915776    |
| Sma-1-17705 | NS_000200.1    | + | 185650202 | 185650250 |
| Sma-1-17706 | NW_003037977.1 | - | 847809    | 847761    |
| Sma-1-17707 | NS_000200.1    | - | 209133829 | 209133781 |
| Sma-1-17708 | NW_003037806.1 | - | 1501826   | 1501778   |
| Sma-1-17709 | NS_000200.1    | - | 29697040  | 29696992  |
| Sma-1-17710 | NW_003037977.1 | - | 135738    | 135690    |
| Sma-1-17711 | NS_000200.1    | - | 208421758 | 208421710 |
| Sma-1-17712 | NW_003038038.1 | - | 264969    | 264921    |
| Sma-1-17713 | NS_000200.1    | - | 252168362 | 252168314 |
| Sma-1-17714 | NW_003037795.1 | - | 1303943   | 1303895   |
| Sma-1-17715 | NS_000200.1    | - | 7694826   | 7694778   |
| Sma-1-17716 | NW_003037941.1 | - | 32133     | 32085     |
| Sma-1-17717 | NS_000200.1    | - | 184766607 | 184766559 |
| Sma-1-17718 | NW_003037797.1 | + | 198007    | 198055    |
| Sma-1-17719 | NS_000200.1    | + | 10625867  | 10625915  |
| Sma-1-17720 | NW_003038498.1 | - | 98498     | 98450     |
| Sma-1-17721 | NS_000200.1    | - | 334518710 | 334518662 |
| Sma-1-17722 | NW_003037822.1 | - | 860346    | 860296    |
| Sma-1-17723 | NS_000200.1    | - | 55168352  | 55168302  |
| Sma-1-17724 | NW_003037822.1 | - | 88591     | 88543     |
| Sma-1-17725 | NS_000200.1    | - | 54396597  | 54396549  |
| Sma-1-17726 | NW_003037913.1 | - | 286774    | 286726    |
| Sma-1-17727 | NS_000200.1    | - | 158850525 | 158850477 |
| Sma-1-17728 | NW_003037797.1 | - | 1912876   | 1912828   |
| Sma-1-17729 | NS_000200.1    | - | 12340736  | 12340688  |
| Sma-1-17730 | NW_003037930.1 | - | 204679    | 204631    |
| Sma-1-17731 | NS_000200.1    | - | 176062643 | 176062595 |
| Sma-1-17732 | NW_003037887.1 | + | 239777    | 239825    |
| Sma-1-17733 | NS_000200.1    | + | 130703755 | 130703803 |
| Sma-1-17734 | NW_003026512.1 | + | 255544    | 255592    |
| Sma-1-17735 | NS_000200.1    | + | 285349584 | 285349632 |
| Sma-1-17736 | NW_003037857.1 | + | 542409    | 542457    |
| Sma-1-17737 | NS_000200.1    | + | 100562766 | 100562814 |
| Sma-1-17738 | NW_003037795.1 | + | 1410519   | 1410567   |
| Sma-1-17739 | NS_000200.1    | + | 7801402   | 7801450   |
| Sma-1-17740 | NW_003037901.1 | + | 758360    | 758408    |
| Sma-1-17741 | NS_000200.1    | + | 146606821 | 146606869 |
| Sma-1-17742 | NW_003037795.1 | + | 622621    | 622669    |
| Sma-1-17743 | NS_000200.1    | + | 7013504   | 7013552   |

|             |                |   |           |           |
|-------------|----------------|---|-----------|-----------|
| Sma-1-17744 | NW_003026517.1 | + | 460921    | 460969    |
| Sma-1-17745 | NS_000200.1    | + | 300066930 | 300066978 |
| Sma-1-17746 | NW_003037836.1 | + | 1214466   | 1214514   |
| Sma-1-17747 | NS_000200.1    | + | 76771565  | 76771613  |
| Sma-1-17748 | NW_003038028.1 | + | 714281    | 714329    |
| Sma-1-17749 | NS_000200.1    | + | 242021855 | 242021903 |
| Sma-1-17750 | NW_003037913.1 | - | 569613    | 569565    |
| Sma-1-17751 | NS_000200.1    | - | 159133364 | 159133316 |
| Sma-1-17752 | NW_003037932.1 | + | 81495     | 81543     |
| Sma-1-17753 | NS_000200.1    | + | 177614691 | 177614739 |
| Sma-1-17754 | NW_003037841.1 | - | 275059    | 275011    |
| Sma-1-17755 | NS_000200.1    | - | 82886240  | 82886192  |
| Sma-1-17756 | NW_003038022.1 | + | 265287    | 265335    |
| Sma-1-17757 | NS_000200.1    | + | 235946129 | 235946177 |
| Sma-1-17758 | NW_003038505.1 | - | 210583    | 210535    |
| Sma-1-17759 | NS_000200.1    | - | 336289920 | 336289872 |
| Sma-1-17760 | NW_003038018.1 | + | 362704    | 362752    |
| Sma-1-17761 | NS_000200.1    | + | 232763554 | 232763602 |
| Sma-1-17762 | NW_003037976.1 | - | 415630    | 415582    |
| Sma-1-17763 | NS_000200.1    | - | 207029945 | 207029897 |
| Sma-1-17764 | NW_003037975.1 | - | 521185    | 521137    |
| Sma-1-17765 | NS_000200.1    | - | 206103409 | 206103361 |
| Sma-1-17766 | NW_003037796.1 | + | 412278    | 412326    |
| Sma-1-17767 | NS_000200.1    | + | 8621922   | 8621970   |
| Sma-1-17768 | NW_003037862.1 | - | 495729    | 495681    |
| Sma-1-17769 | NS_000200.1    | - | 106147390 | 106147342 |
| Sma-1-17770 | NW_003037890.1 | + | 1114294   | 1114342   |
| Sma-1-17771 | NS_000200.1    | + | 136797655 | 136797703 |
| Sma-1-17772 | NW_003037890.1 | + | 180751    | 180799    |
| Sma-1-17773 | NS_000200.1    | + | 135864112 | 135864160 |
| Sma-1-17774 | NW_003037970.1 | - | 381454    | 381401    |
| Sma-1-17775 | NS_000200.1    | - | 201437644 | 201437591 |
| Sma-1-17776 | NW_003026618.1 | - | 72051     | 72002     |
| Sma-1-17777 | NS_000200.1    | - | 321827053 | 321827004 |
| Sma-1-17778 | NW_003037888.1 | + | 856127    | 856175    |
| Sma-1-17779 | NS_000200.1    | + | 133064619 | 133064667 |
| Sma-1-17780 | NW_003037881.1 | - | 846459    | 846411    |
| Sma-1-17781 | NS_000200.1    | - | 125278250 | 125278202 |
| Sma-1-17782 | NW_003037805.1 | + | 401073    | 401121    |
| Sma-1-17783 | NS_000200.1    | + | 26958917  | 26958965  |
| Sma-1-17784 | NW_003039127.1 | + | 1029650   | 1029698   |
| Sma-1-17785 | NS_000200.1    | + | 114107149 | 114107197 |
| Sma-1-17786 | NW_003038010.1 | - | 371417    | 371369    |
| Sma-1-17787 | NS_000200.1    | - | 227189640 | 227189592 |
| Sma-1-17788 | NW_003037807.1 | + | 63788     | 63836     |
| Sma-1-17789 | NS_000200.1    | + | 30325304  | 30325352  |
| Sma-1-17790 | NW_003037835.1 | - | 177740    | 177692    |
| Sma-1-17791 | NS_000200.1    | - | 74574248  | 74574200  |
| Sma-1-17792 | NW_003037850.1 | + | 514449    | 514497    |
| Sma-1-17793 | NS_000200.1    | + | 92500479  | 92500527  |
| Sma-1-17794 | NW_003037794.1 | - | 1218492   | 1218444   |
| Sma-1-17795 | NS_000200.1    | - | 5398087   | 5398039   |

|             |                |   |           |           |
|-------------|----------------|---|-----------|-----------|
| Sma-1-17796 | NW_003037791.1 | - | 403295    | 403247    |
| Sma-1-17797 | NS_000200.1    | - | 382108723 | 382108675 |
| Sma-1-17798 | NW_003037878.1 | + | 297921    | 297969    |
| Sma-1-17799 | NS_000200.1    | + | 122351399 | 122351447 |
| Sma-1-17800 | NW_003037825.1 | + | 879718    | 879766    |
| Sma-1-17801 | NS_000200.1    | + | 60009500  | 60009548  |
| Sma-1-17802 | NW_003037852.1 | - | 494424    | 494376    |
| Sma-1-17803 | NS_000200.1    | - | 94886319  | 94886271  |
| Sma-1-17804 | NW_003037913.1 | + | 951511    | 951559    |
| Sma-1-17805 | NS_000200.1    | + | 159515262 | 159515310 |
| Sma-1-17806 | NW_003038028.1 | + | 4248      | 4296      |
| Sma-1-17807 | NS_000200.1    | + | 241311822 | 241311870 |
| Sma-1-17808 | NW_003037814.1 | - | 1595201   | 1595153   |
| Sma-1-17809 | NS_000200.1    | - | 44579061  | 44579013  |
| Sma-1-17810 | NW_003037809.1 | - | 2393865   | 2393817   |
| Sma-1-17811 | NS_000200.1    | - | 36058329  | 36058281  |
| Sma-1-17812 | NW_003037938.1 | + | 643136    | 643184    |
| Sma-1-17813 | NS_000200.1    | + | 182680249 | 182680297 |
| Sma-1-17814 | NW_003026611.1 | - | 165210    | 165162    |
| Sma-1-17815 | NS_000200.1    | - | 310734994 | 310734946 |
| Sma-1-17816 | NW_003038043.1 | - | 157369    | 157321    |
| Sma-1-17817 | NS_000200.1    | - | 254467411 | 254467363 |
| Sma-1-17818 | NW_003037808.1 | - | 506891    | 506843    |
| Sma-1-17819 | NS_000200.1    | - | 32293528  | 32293480  |
| Sma-1-17820 | NW_003037873.1 | + | 66619     | 66667     |
| Sma-1-17821 | NW_003037873.1 | - | 63553     | 63505     |
| Sma-1-17822 | NS_000200.1    | + | 118805747 | 118805795 |
| Sma-1-17823 | NS_000200.1    | - | 118802681 | 118802633 |
| Sma-1-17824 | NW_003037873.1 | - | 64091     | 64043     |
| Sma-1-17825 | NS_000200.1    | - | 118803219 | 118803171 |
| Sma-1-17826 | NW_003038043.1 | + | 167555    | 167603    |
| Sma-1-17827 | NS_000200.1    | + | 254477597 | 254477645 |
| Sma-1-17828 | NW_003026465.1 | + | 41813     | 41861     |
| Sma-1-17829 | NS_000200.1    | + | 207434407 | 207434455 |
| Sma-1-17830 | NW_003037851.1 | + | 373778    | 373826    |
| Sma-1-17831 | NS_000200.1    | + | 93777088  | 93777136  |
| Sma-1-17832 | NW_003026456.1 | + | 537223    | 537271    |
| Sma-1-17833 | NS_000200.1    | + | 58460359  | 58460407  |
| Sma-1-17834 | NW_003037800.1 | - | 1134480   | 1134432   |
| Sma-1-17835 | NS_000200.1    | - | 19763840  | 19763792  |
| Sma-1-17836 | NW_003038249.1 | + | 240583    | 240631    |
| Sma-1-17837 | NS_000200.1    | + | 316922836 | 316922884 |
| Sma-1-17838 | NW_003026572.1 | + | 22899     | 22947     |
| Sma-1-17839 | NS_000200.1    | + | 301748988 | 301749036 |
| Sma-1-17840 | NW_003037928.1 | + | 340286    | 340334    |
| Sma-1-17841 | NS_000200.1    | + | 174664239 | 174664287 |
| Sma-1-17842 | NW_003037928.1 | + | 226053    | 226101    |
| Sma-1-17843 | NS_000200.1    | + | 174550006 | 174550054 |
| Sma-1-17844 | NW_003037914.1 | - | 1167143   | 1167095   |
| Sma-1-17845 | NS_000200.1    | - | 161311393 | 161311345 |
| Sma-1-17846 | NW_003037800.1 | - | 1574126   | 1574078   |
| Sma-1-17847 | NS_000200.1    | - | 20203486  | 20203438  |

|             |                |   |           |           |
|-------------|----------------|---|-----------|-----------|
| Sma-1-17848 | NW_003038078.1 | + | 18165     | 18213     |
| Sma-1-17849 | NS_000200.1    | + | 267224368 | 267224416 |
| Sma-1-17850 | NW_003038077.1 | + | 66909     | 66957     |
| Sma-1-17851 | NS_000200.1    | + | 266838549 | 266838597 |
| Sma-1-17852 | NW_003037889.1 | + | 1397483   | 1397534   |
| Sma-1-17853 | NS_000200.1    | + | 135173973 | 135174024 |
| Sma-1-17854 | NW_003026594.1 | - | 38490     | 38442     |
| Sma-1-17855 | NS_000200.1    | - | 304982860 | 304982812 |
| Sma-1-17856 | NW_003037973.1 | - | 13880     | 13830     |
| Sma-1-17857 | NS_000200.1    | - | 203995607 | 203995557 |
| Sma-1-17858 | NW_003037981.1 | + | 1249662   | 1249710   |
| Sma-1-17859 | NS_000200.1    | + | 213647530 | 213647578 |
| Sma-1-17860 | NW_003038028.1 | + | 17        | 65        |
| Sma-1-17861 | NS_000200.1    | + | 241307591 | 241307639 |
| Sma-1-17862 | NW_003026490.1 | + | 74450     | 74498     |
| Sma-1-17863 | NS_000200.1    | + | 267706166 | 267706214 |
| Sma-1-17864 | NW_003037980.1 | + | 38999     | 39047     |
| Sma-1-17865 | NS_000200.1    | + | 210999861 | 210999909 |
| Sma-1-17866 | NW_003037844.1 | - | 385739    | 385689    |
| Sma-1-17867 | NS_000200.1    | - | 86569185  | 86569135  |
| Sma-1-17868 | NW_003037800.1 | - | 389152    | 389104    |
| Sma-1-17869 | NS_000200.1    | - | 19018512  | 19018464  |
| Sma-1-17870 | NW_003038019.1 | - | 264706    | 264658    |
| Sma-1-17871 | NS_000200.1    | - | 233581524 | 233581476 |
| Sma-1-17872 | NW_003037939.1 | - | 677940    | 677892    |
| Sma-1-17873 | NS_000200.1    | - | 183547694 | 183547646 |
| Sma-1-17874 | NW_003037792.1 | + | 172818    | 172866    |
| Sma-1-17875 | NS_000200.1    | + | 382610162 | 382610210 |
| Sma-1-17876 | NW_003037939.1 | - | 504880    | 504832    |
| Sma-1-17877 | NS_000200.1    | - | 183374634 | 183374586 |
| Sma-1-17878 | NW_003037889.1 | + | 1711946   | 1711994   |
| Sma-1-17879 | NS_000200.1    | + | 135488436 | 135488484 |
| Sma-1-17880 | NW_003037908.1 | - | 945956    | 945908    |
| Sma-1-17881 | NS_000200.1    | - | 153419087 | 153419039 |
| Sma-1-17882 | NW_003037972.1 | - | 366750    | 366702    |
| Sma-1-17883 | NS_000200.1    | - | 202842454 | 202842406 |
| Sma-1-17884 | NW_003037976.1 | - | 149627    | 149579    |
| Sma-1-17885 | NS_000200.1    | - | 206763942 | 206763894 |
| Sma-1-17886 | NW_003038063.1 | - | 213687    | 213639    |
| Sma-1-17887 | NS_000200.1    | - | 261709965 | 261709917 |
| Sma-1-17888 | NW_003037917.1 | - | 1342692   | 1342644   |
| Sma-1-17889 | NS_000200.1    | - | 166379496 | 166379448 |
| Sma-1-17890 | NW_003037921.1 | - | 17755     | 17707     |
| Sma-1-17891 | NS_000200.1    | - | 169547890 | 169547842 |
| Sma-1-17892 | NW_003037814.1 | - | 980953    | 980905    |
| Sma-1-17893 | NS_000200.1    | - | 43964813  | 43964765  |
| Sma-1-17894 | NW_003037814.1 | + | 92242     | 92290     |
| Sma-1-17895 | NS_000200.1    | + | 43076102  | 43076150  |
| Sma-1-17896 | NW_003037915.1 | + | 1148119   | 1148167   |
| Sma-1-17897 | NS_000200.1    | + | 163048105 | 163048153 |
| Sma-1-17898 | NW_003026497.1 | + | 14380     | 14428     |
| Sma-1-17899 | NW_003037889.1 | + | 777570    | 777618    |

|             |                |   |           |           |
|-------------|----------------|---|-----------|-----------|
| Sma-1-17900 | NS_000200.1    | + | 134554060 | 134554108 |
| Sma-1-17901 | NS_000200.1    | + | 274674572 | 274674620 |
| Sma-1-17902 | NW_003037908.1 | - | 1031685   | 1031637   |
| Sma-1-17903 | NS_000200.1    | - | 153504816 | 153504768 |
| Sma-1-17904 | NW_003037939.1 | - | 394144    | 394096    |
| Sma-1-17905 | NS_000200.1    | - | 183263898 | 183263850 |
| Sma-1-17906 | NW_003037918.1 | - | 71632     | 71584     |
| Sma-1-17907 | NS_000200.1    | - | 166638622 | 166638574 |
| Sma-1-17908 | NW_003037832.1 | + | 61648     | 61696     |
| Sma-1-17909 | NS_000200.1    | + | 71271079  | 71271127  |
| Sma-1-17910 | NW_003037889.1 | - | 1756402   | 1756354   |
| Sma-1-17911 | NS_000200.1    | - | 135532892 | 135532844 |
| Sma-1-17912 | NW_003037939.1 | - | 362926    | 362878    |
| Sma-1-17913 | NS_000200.1    | - | 183232680 | 183232632 |
| Sma-1-17914 | NW_003030306.1 | - | 1155      | 1107      |
| Sma-1-17915 | NS_000200.1    | - | 362638438 | 362638390 |
| Sma-1-17916 | NW_003037982.1 | - | 1037347   | 1037299   |
| Sma-1-17917 | NS_000200.1    | - | 214696542 | 214696494 |
| Sma-1-17918 | NW_003037797.1 | + | 272201    | 272249    |
| Sma-1-17919 | NS_000200.1    | + | 10700061  | 10700109  |
| Sma-1-17920 | NW_003030458.1 | - | 885       | 837       |
| Sma-1-17921 | NS_000200.1    | - | 362953158 | 362953110 |
| Sma-1-17922 | NW_003037962.1 | + | 472433    | 472481    |
| Sma-1-17923 | NS_000200.1    | + | 196549276 | 196549324 |
| Sma-1-17924 | NW_003037803.1 | - | 169666    | 169618    |
| Sma-1-17925 | NS_000200.1    | - | 23670203  | 23670155  |
| Sma-1-17926 | NW_003037827.1 | - | 390120    | 390072    |
| Sma-1-17927 | NS_000200.1    | - | 63012261  | 63012213  |
| Sma-1-17928 | NW_003037793.1 | + | 250341    | 250389    |
| Sma-1-17929 | NS_000200.1    | + | 250341    | 250389    |
| Sma-1-17930 | NW_003022670.1 | + | 258       | 307       |
| Sma-1-17931 | NS_000200.1    | + | 365389328 | 365389377 |
| Sma-1-17932 | NW_003037913.1 | - | 1327791   | 1327742   |
| Sma-1-17933 | NS_000200.1    | - | 159891542 | 159891493 |
| Sma-1-17934 | NW_003026517.1 | - | 313005    | 312956    |
| Sma-1-17935 | NS_000200.1    | - | 299919014 | 299918965 |
| Sma-1-17936 | NW_003038025.1 | - | 26340     | 26292     |
| Sma-1-17937 | NS_000200.1    | - | 238884585 | 238884537 |
| Sma-1-17938 | NW_003037893.1 | - | 232857    | 232808    |
| Sma-1-17939 | NS_000200.1    | - | 141347167 | 141347118 |
| Sma-1-17940 | NW_003037975.1 | - | 48240     | 48191     |
| Sma-1-17941 | NS_000200.1    | - | 205630464 | 205630415 |
| Sma-1-17942 | NW_003037833.1 | - | 749872    | 749823    |
| Sma-1-17943 | NS_000200.1    | - | 72940968  | 72940919  |
| Sma-1-17944 | NW_003037914.1 | - | 186229    | 186180    |
| Sma-1-17945 | NS_000200.1    | - | 160330479 | 160330430 |
| Sma-1-17946 | NW_003037801.1 | + | 824593    | 824642    |
| Sma-1-17947 | NS_000200.1    | + | 21914073  | 21914122  |
| Sma-1-17948 | NW_003038135.1 | - | 187210    | 187159    |
| Sma-1-17949 | NW_003038135.1 | - | 181517    | 181466    |
| Sma-1-17950 | NS_000200.1    | - | 284059549 | 284059498 |
| Sma-1-17951 | NS_000200.1    | - | 284053856 | 284053805 |

|             |                |   |           |           |
|-------------|----------------|---|-----------|-----------|
| Sma-1-17952 | NW_003037856.1 | + | 622481    | 622533    |
| Sma-1-17953 | NS_000200.1    | + | 99980437  | 99980489  |
| Sma-1-17954 | NW_003026619.1 | + | 148375    | 148426    |
| Sma-1-17955 | NS_000200.1    | + | 322339119 | 322339170 |
| Sma-1-17956 | NW_003037970.1 | + | 306002    | 306053    |
| Sma-1-17957 | NS_000200.1    | + | 201362192 | 201362243 |
| Sma-1-17958 | NW_003038077.1 | + | 206624    | 206675    |
| Sma-1-17959 | NS_000200.1    | + | 266978264 | 266978315 |
| Sma-1-17960 | NW_003038077.1 | + | 60344     | 60395     |
| Sma-1-17961 | NS_000200.1    | + | 266831984 | 266832035 |
| Sma-1-17962 | NW_003038249.1 | - | 245340    | 245289    |
| Sma-1-17963 | NS_000200.1    | - | 316927593 | 316927542 |
| Sma-1-17964 | NW_003024539.1 | + | 70        | 121       |
| Sma-1-17965 | NS_000200.1    | + | 348816488 | 348816539 |
| Sma-1-17966 | NW_003038261.1 | + | 995488    | 995539    |
| Sma-1-17967 | NS_000200.1    | + | 324609139 | 324609190 |
| Sma-1-17968 | NW_003038044.1 | + | 96164     | 96215     |
| Sma-1-17969 | NS_000200.1    | + | 254720946 | 254720997 |
| Sma-1-17970 | NW_003037809.1 | + | 2572393   | 2572444   |
| Sma-1-17971 | NS_000200.1    | + | 36236857  | 36236908  |
| Sma-1-17972 | NW_003037827.1 | + | 2444700   | 2444748   |
| Sma-1-17973 | NS_000200.1    | + | 65066841  | 65066889  |
| Sma-1-17974 | NW_003037796.1 | - | 302932    | 302884    |
| Sma-1-17975 | NS_000200.1    | - | 8512576   | 8512528   |
| Sma-1-17976 | NW_003037915.1 | + | 1150559   | 1150607   |
| Sma-1-17977 | NS_000200.1    | + | 163050545 | 163050593 |
| Sma-1-17978 | NW_003037961.1 | + | 354921    | 354969    |
| Sma-1-17979 | NS_000200.1    | + | 195979163 | 195979211 |
| Sma-1-17980 | NW_003038514.1 | - | 208068    | 208020    |
| Sma-1-17981 | NS_000200.1    | - | 339832607 | 339832559 |
| Sma-1-17982 | NW_003037866.1 | + | 1085169   | 1085217   |
| Sma-1-17983 | NS_000200.1    | + | 112572968 | 112573016 |
| Sma-1-17984 | NW_003035874.1 | - | 22585     | 22537     |
| Sma-1-17985 | NS_000200.1    | - | 336000129 | 336000081 |
| Sma-1-17986 | NW_003037925.1 | + | 360299    | 360347    |
| Sma-1-17987 | NS_000200.1    | + | 172762302 | 172762350 |
| Sma-1-17988 | NW_003037914.1 | + | 1373667   | 1373715   |
| Sma-1-17989 | NS_000200.1    | + | 161517917 | 161517965 |
| env-89      | AB231864.1     | + | 52925     | 52969     |
| Sma-1-17990 | NW_003026458.1 | - | 123293    | 123245    |
| Sma-1-17991 | NS_000200.1    | - | 101991523 | 101991475 |
| Sma-1-17992 | NW_003038086.1 | + | 315242    | 315288    |
| Sma-1-17993 | NS_000200.1    | + | 272563835 | 272563881 |
| Sma-1-17994 | NW_003037809.1 | + | 236194    | 236245    |
| Sma-1-17995 | NS_000200.1    | + | 33900658  | 33900709  |
| Sma-1-17996 | NW_003037977.1 | - | 131024    | 130977    |
| Sma-1-17997 | NS_000200.1    | - | 208417044 | 208416997 |
| Sma-1-17998 | NW_003026510.1 | - | 208119    | 208072    |
| Sma-1-17999 | NS_000200.1    | - | 283648300 | 283648253 |
| Sma-1-18000 | NW_003037793.1 | + | 3121800   | 3121847   |
| Sma-1-18001 | NS_000200.1    | + | 3121800   | 3121847   |
| Sma-1-18002 | NW_003037910.1 | + | 1127760   | 1127807   |

|             |                |   |           |           |
|-------------|----------------|---|-----------|-----------|
| Sma-1-18003 | NS_000200.1    | + | 155639735 | 155639782 |
| Sma-1-18004 | NW_003037936.1 | - | 605295    | 605247    |
| Sma-1-18005 | NS_000200.1    | - | 181045024 | 181044976 |
| Sma-1-18006 | NW_003037796.1 | - | 39066     | 39018     |
| Sma-1-18007 | NS_000200.1    | - | 8248710   | 8248662   |
| Sma-1-18008 | NW_003037853.1 | - | 490473    | 490425    |
| Sma-1-18009 | NS_000200.1    | - | 95982524  | 95982476  |
| Sma-1-18010 | NW_003038161.1 | - | 433960    | 433912    |
| Sma-1-18011 | NS_000200.1    | - | 297803811 | 297803763 |
| Sma-1-18012 | NW_003037851.1 | + | 84886     | 84934     |
| Sma-1-18013 | NS_000200.1    | + | 93488196  | 93488244  |
| Sma-1-18014 | NW_003038161.1 | + | 411620    | 411668    |
| Sma-1-18015 | NS_000200.1    | + | 297781471 | 297781519 |
| Sma-1-18016 | NW_003026612.1 | + | 114277    | 114326    |
| Sma-1-18017 | NS_000200.1    | + | 312419664 | 312419713 |
| Sma-1-18018 | NW_003037889.1 | + | 1361301   | 1361349   |
| Sma-1-18019 | NW_003038141.1 | - | 278733    | 278685    |
| Sma-1-18020 | NS_000200.1    | + | 135137791 | 135137839 |
| Sma-1-18021 | NS_000200.1    | - | 287168712 | 287168664 |
| Sma-1-18022 | NW_003037932.1 | - | 843532    | 843484    |
| Sma-1-18023 | NS_000200.1    | - | 178376728 | 178376680 |
| Sma-1-18024 | NW_003037848.1 | + | 1043444   | 1043492   |
| Sma-1-18025 | NS_000200.1    | + | 90736515  | 90736563  |
| Sma-1-18026 | NW_003037884.1 | - | 1152058   | 1152010   |
| Sma-1-18027 | NS_000200.1    | - | 127931723 | 127931675 |
| Sma-1-18028 | NW_003037822.1 | - | 1408894   | 1408846   |
| Sma-1-18029 | NS_000200.1    | - | 55716900  | 55716852  |
| Sma-1-18030 | NW_003038063.1 | + | 70286     | 70334     |
| Sma-1-18031 | NS_000200.1    | + | 261566564 | 261566612 |
| Sma-1-18032 | NW_003037850.1 | - | 394094    | 394046    |
| Sma-1-18033 | NS_000200.1    | - | 92380124  | 92380076  |
| Sma-1-18034 | NW_003037961.1 | - | 152073    | 152025    |
| Sma-1-18035 | NS_000200.1    | - | 195776315 | 195776267 |
| Sma-1-18036 | NW_003037819.1 | - | 931518    | 931470    |
| Sma-1-18037 | NS_000200.1    | - | 52019783  | 52019735  |
| Sma-1-18038 | NW_003037891.1 | + | 2782044   | 2782092   |
| Sma-1-18039 | NW_003037935.1 | - | 729045    | 728997    |
| Sma-1-18040 | NS_000200.1    | + | 140663322 | 140663370 |
| Sma-1-18041 | NS_000200.1    | - | 180145580 | 180145532 |
| Sma-1-18042 | NW_003037838.1 | + | 379390    | 379438    |
| Sma-1-18043 | NW_003037891.1 | + | 1240167   | 1240215   |
| Sma-1-18044 | NS_000200.1    | + | 78377953  | 78378001  |
| Sma-1-18045 | NS_000200.1    | + | 139121445 | 139121493 |
| Sma-1-18046 | NW_003028426.1 | + | 24        | 72        |
| Sma-1-18047 | NS_000200.1    | + | 369593969 | 369594017 |
| Sma-1-18048 | NW_003037825.1 | + | 1167355   | 1167403   |
| Sma-1-18049 | NS_000200.1    | + | 60297137  | 60297185  |
| Sma-1-18050 | NW_003028854.1 | + | 1424      | 1472      |
| Sma-1-18051 | NS_000200.1    | + | 370089049 | 370089097 |
| Sma-1-18052 | NW_003037793.1 | + | 888204    | 888252    |
| Sma-1-18053 | NS_000200.1    | + | 888204    | 888252    |
| Sma-1-18054 | NW_003037845.1 | - | 235715    | 235667    |

|             |                |   |           |           |
|-------------|----------------|---|-----------|-----------|
| Sma-1-18055 | NS_000200.1    | - | 87237618  | 87237570  |
| Sma-1-18056 | NW_003037865.1 | - | 92888     | 92840     |
| Sma-1-18057 | NS_000200.1    | - | 110514807 | 110514759 |
| Sma-1-18058 | NW_003037825.1 | + | 1200550   | 1200598   |
| Sma-1-18059 | NS_000200.1    | + | 60330332  | 60330380  |
| Sma-1-18060 | NW_003026497.1 | - | 8447      | 8399      |
| Sma-1-18061 | NS_000200.1    | - | 274668639 | 274668591 |
| Sma-1-18062 | NW_003037843.1 | + | 488735    | 488783    |
| Sma-1-18063 | NS_000200.1    | + | 86128042  | 86128090  |
| Sma-1-18064 | NW_003026490.1 | + | 28862     | 28910     |
| Sma-1-18065 | NS_000200.1    | + | 267660578 | 267660626 |
| Sma-1-18066 | NW_003037932.1 | + | 531597    | 531645    |
| Sma-1-18067 | NS_000200.1    | + | 178064793 | 178064841 |
| Sma-1-18068 | NW_003037841.1 | - | 1637708   | 1637660   |
| Sma-1-18069 | NS_000200.1    | - | 84248889  | 84248841  |
| Sma-1-18070 | NW_003037863.1 | - | 520411    | 520363    |
| Sma-1-18071 | NW_003038079.1 | + | 105320    | 105368    |
| Sma-1-18072 | NS_000200.1    | + | 268235308 | 268235356 |
| Sma-1-18073 | NS_000200.1    | - | 107278778 | 107278730 |
| Sma-1-18074 | NW_003037794.1 | + | 1792448   | 1792496   |
| Sma-1-18075 | NS_000200.1    | + | 5972043   | 5972091   |
| Sma-1-18076 | NW_003037932.1 | + | 254082    | 254130    |
| Sma-1-18077 | NS_000200.1    | + | 177787278 | 177787326 |
| Sma-1-18078 | NW_003038033.1 | - | 610512    | 610464    |
| Sma-1-18079 | NS_000200.1    | - | 246590514 | 246590466 |
| Sma-1-18080 | NW_003035557.1 | - | 1067      | 1019      |
| Sma-1-18081 | NS_000200.1    | - | 328423226 | 328423178 |
| Sma-1-18082 | NW_003037886.1 | + | 1071136   | 1071184   |
| Sma-1-18083 | NS_000200.1    | + | 130326703 | 130326751 |
| Sma-1-18084 | NW_003038033.1 | + | 858744    | 858792    |
| Sma-1-18085 | NS_000200.1    | + | 246838746 | 246838794 |
| Sma-1-18086 | NW_003037840.1 | + | 1566873   | 1566921   |
| Sma-1-18087 | NS_000200.1    | + | 82190197  | 82190245  |
| Sma-1-18088 | NW_003037945.1 | - | 403255    | 403207    |
| Sma-1-18089 | NS_000200.1    | - | 189505219 | 189505171 |
| Sma-1-18090 | NW_003037886.1 | - | 1010135   | 1010087   |
| Sma-1-18091 | NS_000200.1    | - | 130265702 | 130265654 |
| Sma-1-18092 | NW_003035866.1 | - | 33026     | 32978     |
| Sma-1-18093 | NS_000200.1    | - | 334126836 | 334126788 |
| Sma-1-18094 | NW_003037871.1 | - | 33815     | 33767     |
| Sma-1-18095 | NS_000200.1    | - | 117481553 | 117481505 |
| Sma-1-18096 | NW_003035879.1 | + | 195194    | 195242    |
| Sma-1-18097 | NS_000200.1    | + | 338162521 | 338162569 |
| Sma-1-18098 | NW_003022240.1 | - | 1052      | 1004      |
| Sma-1-18099 | NW_003037819.1 | - | 158589    | 158541    |
| Sma-1-18100 | NS_000200.1    | - | 360996228 | 360996180 |
| Sma-1-18101 | NS_000200.1    | - | 51246854  | 51246806  |
| Sma-1-18102 | NW_003037819.1 | + | 1004782   | 1004830   |
| Sma-1-18103 | NS_000200.1    | + | 52093047  | 52093095  |
| Sma-1-18104 | NW_003037873.1 | + | 593287    | 593335    |
| Sma-1-18105 | NS_000200.1    | + | 119332415 | 119332463 |
| Sma-1-18106 | NW_003038378.1 | + | 15308     | 15356     |



|             |                |   |           |           |
|-------------|----------------|---|-----------|-----------|
| Sma-1-18107 | NS_000200.1    | + | 327517493 | 327517541 |
| Sma-1-18108 | NW_003037874.1 | + | 297188    | 297236    |
| Sma-1-18109 | NS_000200.1    | + | 119722138 | 119722186 |
| Sma-1-18110 | NW_003037901.1 | - | 317763    | 317715    |
| Sma-1-18111 | NS_000200.1    | - | 146166224 | 146166176 |
| Sma-1-18112 | NW_003038000.1 | + | 52692     | 52740     |
| Sma-1-18113 | NS_000200.1    | + | 222523470 | 222523518 |
| Sma-1-18114 | NW_003038087.1 | - | 368833    | 368785    |
| Sma-1-18115 | NS_000200.1    | - | 273397234 | 273397186 |
| Sma-1-18116 | NW_003037997.1 | + | 420315    | 420363    |
| Sma-1-18117 | NS_000200.1    | + | 221231757 | 221231805 |
| Sma-1-18118 | NW_003038487.1 | - | 57134     | 57086     |
| Sma-1-18119 | NS_000200.1    | - | 333512921 | 333512873 |
| Sma-1-18120 | NW_003037443.1 | - | 380       | 332       |
| Sma-1-18121 | NW_003037944.1 | - | 281583    | 281535    |
| Sma-1-18122 | NS_000200.1    | - | 369331982 | 369331934 |
| Sma-1-18123 | NS_000200.1    | - | 188502936 | 188502888 |
| Sma-1-18124 | NW_003037796.1 | + | 2142889   | 2142937   |
| Sma-1-18125 | NS_000200.1    | + | 10352533  | 10352581  |
| Sma-1-18126 | NW_003037913.1 | + | 455701    | 455749    |
| Sma-1-18127 | NS_000200.1    | + | 159019452 | 159019500 |
| Sma-1-18128 | NW_003038038.1 | - | 547908    | 547859    |
| Sma-1-18129 | NS_000200.1    | - | 252451301 | 252451252 |
| Sma-1-18130 | NW_003037809.1 | + | 1383962   | 1384010   |
| Sma-1-18131 | NS_000200.1    | + | 35048426  | 35048474  |
| Sma-1-18132 | NW_003037800.1 | + | 622107    | 622156    |
| Sma-1-18133 | NS_000200.1    | + | 19251467  | 19251516  |
| Sma-1-18134 | NW_003037792.1 | - | 138401    | 138351    |
| Sma-1-18135 | NS_000200.1    | - | 382575745 | 382575695 |
| Sma-1-18136 | NW_003037809.1 | - | 2450654   | 2450606   |
| Sma-1-18137 | NS_000200.1    | - | 36115118  | 36115070  |
| Sma-1-18138 | NW_003037805.1 | - | 400949    | 400901    |
| Sma-1-18139 | NS_000200.1    | - | 26958793  | 26958745  |
| Sma-1-18140 | NW_003037832.1 | + | 554480    | 554526    |
| Sma-1-18141 | NS_000200.1    | + | 71763911  | 71763957  |
| Sma-1-18142 | NW_003026607.1 | - | 40833     | 40785     |
| Sma-1-18143 | NS_000200.1    | - | 308073218 | 308073170 |
| Sma-1-18144 | NW_003037942.1 | + | 235743    | 235791    |
| Sma-1-18145 | NS_000200.1    | + | 185995651 | 185995699 |
| Sma-1-18146 | NW_003037901.1 | + | 349808    | 349856    |
| Sma-1-18147 | NS_000200.1    | + | 146198269 | 146198317 |
| Sma-1-18148 | NW_003037986.1 | + | 123567    | 123613    |
| Sma-1-18149 | NS_000200.1    | + | 215540319 | 215540365 |
| Sma-1-18150 | NW_003037809.1 | - | 2024102   | 2024054   |
| Sma-1-18151 | NS_000200.1    | - | 35688566  | 35688518  |
| Sma-1-18152 | NW_003037810.1 | + | 31871     | 31919     |
| Sma-1-18153 | NS_000200.1    | + | 36636393  | 36636441  |
| Sma-1-18154 | NW_003037915.1 | + | 271503    | 271551    |
| Sma-1-18155 | NS_000200.1    | + | 162171489 | 162171537 |
| Sma-1-18156 | NW_003037915.1 | + | 1187406   | 1187454   |
| Sma-1-18157 | NS_000200.1    | + | 163087392 | 163087440 |
| Sma-1-18158 | NW_003037813.1 | - | 888146    | 888098    |

|             |                |   |           |           |
|-------------|----------------|---|-----------|-----------|
| Sma-1-18159 | NS.000200.1    | - | 41875009  | 41874961  |
| Sma-1-18160 | NW_003038016.1 | - | 338198    | 338150    |
| Sma-1-18161 | NS.000200.1    | - | 231454735 | 231454687 |
| Sma-1-18162 | NW_003037816.1 | + | 322945    | 322993    |
| Sma-1-18163 | NS.000200.1    | + | 46531817  | 46531865  |
| Sma-1-18164 | NW_003026507.1 | - | 56699     | 56651     |
| Sma-1-18165 | NS.000200.1    | - | 279716850 | 279716802 |
| Sma-1-18166 | NW_003037816.1 | + | 319720    | 319768    |
| Sma-1-18167 | NS.000200.1    | + | 46528592  | 46528640  |
| Sma-1-18168 | NW_003037964.1 | - | 101266    | 101218    |
| Sma-1-18169 | NS.000200.1    | - | 197702788 | 197702740 |
| Sma-1-18170 | NW_003037995.1 | - | 20876     | 20828     |
| Sma-1-18171 | NS.000200.1    | - | 219710644 | 219710596 |
| Sma-1-18172 | NW_003038142.1 | - | 426518    | 426470    |
| Sma-1-18173 | NS.000200.1    | - | 287636954 | 287636906 |
| Sma-1-18174 | NW_003037804.1 | - | 464358    | 464310    |
| Sma-1-18175 | NW_003037885.1 | - | 395554    | 395506    |
| Sma-1-18176 | NW_003037964.1 | + | 72141     | 72189     |
| Sma-1-18177 | NW_003037973.1 | - | 625869    | 625821    |
| Sma-1-18178 | NS.000200.1    | + | 197673663 | 197673711 |
| Sma-1-18179 | NS.000200.1    | - | 204607596 | 204607548 |
| Sma-1-18180 | NS.000200.1    | - | 128493501 | 128493453 |
| Sma-1-18181 | NS.000200.1    | - | 25604378  | 25604330  |
| Sma-1-18182 | NW_003037820.1 | - | 685620    | 685572    |
| Sma-1-18183 | NW_003037864.1 | + | 154042    | 154090    |
| Sma-1-18184 | NW_003038007.1 | - | 143527    | 143479    |
| Sma-1-18185 | NS.000200.1    | + | 108646616 | 108646664 |
| Sma-1-18186 | NS.000200.1    | - | 225392082 | 225392034 |
| Sma-1-18187 | NS.000200.1    | - | 52958602  | 52958554  |
| Sma-1-18188 | NW_003025257.1 | - | 797       | 749       |
| Sma-1-18189 | NS.000200.1    | - | 361496333 | 361496285 |
| Sma-1-18190 | NW_003037917.1 | - | 1431664   | 1431616   |
| Sma-1-18191 | NS.000200.1    | - | 166468468 | 166468420 |
| Sma-1-18192 | NW_003037876.1 | + | 280592    | 280640    |
| Sma-1-18193 | NS.000200.1    | + | 120826228 | 120826276 |
| Sma-1-18194 | NW_003037803.1 | + | 462545    | 462593    |
| Sma-1-18195 | NS.000200.1    | + | 23963082  | 23963130  |
| Sma-1-18196 | NW_003037849.1 | + | 487755    | 487803    |
| Sma-1-18197 | NS.000200.1    | + | 91464028  | 91464076  |
| Sma-1-18198 | NW_003037848.1 | - | 1062113   | 1062065   |
| Sma-1-18199 | NS.000200.1    | - | 90755184  | 90755136  |
| Sma-1-18200 | NW_003038022.1 | + | 538735    | 538783    |
| Sma-1-18201 | NS.000200.1    | + | 236219577 | 236219625 |
| Sma-1-18202 | NW_003037831.1 | - | 1057305   | 1057257   |
| Sma-1-18203 | NS.000200.1    | - | 70506607  | 70506559  |
| Sma-1-18204 | NW_003037888.1 | - | 1420478   | 1420430   |
| Sma-1-18205 | NS.000200.1    | - | 133628970 | 133628922 |
| Sma-1-18206 | NW_003035282.1 | - | 834       | 786       |
| Sma-1-18207 | NS.000200.1    | - | 370943866 | 370943818 |
| Sma-1-18208 | NW_003026481.1 | + | 32296     | 32344     |
| Sma-1-18209 | NS.000200.1    | + | 255432280 | 255432328 |
| Sma-1-18210 | NW_003038025.1 | + | 98060     | 98110     |

|             |                |   |           |           |
|-------------|----------------|---|-----------|-----------|
| Sma-1-18211 | NS_000200.1    | + | 238956305 | 238956355 |
| Sma-1-18212 | NW_003038253.1 | - | 16391     | 16343     |
| Sma-1-18213 | NS_000200.1    | - | 319334188 | 319334140 |
| Sma-1-18214 | NW_003037804.1 | - | 1096830   | 1096782   |
| Sma-1-18215 | NW_003038036.1 | - | 530952    | 530904    |
| Sma-1-18216 | NS_000200.1    | - | 249464804 | 249464756 |
| Sma-1-18217 | NS_000200.1    | - | 26236850  | 26236802  |
| Sma-1-18218 | NW_003037854.1 | - | 387543    | 387495    |
| Sma-1-18219 | NS_000200.1    | - | 97291964  | 97291916  |
| Sma-1-18220 | NW_003037867.1 | + | 370057    | 370105    |
| Sma-1-18221 | NW_003026456.1 | + | 368472    | 368520    |
| Sma-1-18222 | NW_003037836.1 | + | 738848    | 738896    |
| Sma-1-18223 | NW_003037853.1 | + | 901121    | 901169    |
| Sma-1-18224 | NS_000200.1    | + | 58291608  | 58291656  |
| Sma-1-18225 | NS_000200.1    | + | 76295947  | 76295995  |
| Sma-1-18226 | NS_000200.1    | + | 96393172  | 96393220  |
| Sma-1-18227 | NS_000200.1    | + | 115970876 | 115970924 |
| Sma-1-18228 | NW_003038487.1 | + | 58845     | 58893     |
| Sma-1-18229 | NW_003037796.1 | - | 316539    | 316491    |
| Sma-1-18230 | NW_003037822.1 | + | 41805     | 41853     |
| Sma-1-18231 | NW_003037916.1 | + | 204324    | 204372    |
| Sma-1-18232 | NW_003037976.1 | + | 136897    | 136945    |
| Sma-1-18233 | NS_000200.1    | + | 54349811  | 54349859  |
| Sma-1-18234 | NS_000200.1    | + | 163397735 | 163397783 |
| Sma-1-18235 | NS_000200.1    | + | 206751212 | 206751260 |
| Sma-1-18236 | NS_000200.1    | + | 333514632 | 333514680 |
| Sma-1-18237 | NS_000200.1    | - | 8526183   | 8526135   |
| Sma-1-18238 | NW_003037878.1 | + | 789837    | 789885    |
| Sma-1-18239 | NW_003038032.1 | + | 796833    | 796881    |
| Sma-1-18240 | NS_000200.1    | + | 122843315 | 122843363 |
| Sma-1-18241 | NS_000200.1    | + | 245955993 | 245956041 |
| Sma-1-18242 | NW_003037881.1 | + | 639550    | 639598    |
| Sma-1-18243 | NS_000200.1    | + | 125071341 | 125071389 |
| Sma-1-18244 | NW_003031002.1 | + | 139       | 187       |
| Sma-1-18245 | NS_000200.1    | + | 325491373 | 325491421 |
| Sma-1-18246 | NW_003026477.1 | + | 12415     | 12463     |
| Sma-1-18247 | NW_003030975.1 | - | 153       | 105       |
| Sma-1-18248 | NW_003034628.1 | + | 285       | 333       |
| Sma-1-18249 | NW_003035151.1 | - | 1162      | 1114      |
| Sma-1-18250 | NW_003035675.1 | + | 9721      | 9769      |
| Sma-1-18251 | NW_003038514.1 | + | 437566    | 437614    |
| Sma-1-18252 | NW_003038443.1 | - | 23147     | 23099     |
| Sma-1-18253 | NW_003026605.1 | + | 99962     | 100010    |
| Sma-1-18254 | NW_003037766.1 | + | 24963     | 25011     |
| Sma-1-18255 | NW_003037867.1 | - | 269266    | 269218    |
| Sma-1-18256 | NW_003038460.1 | - | 25484     | 25436     |
| Sma-1-18257 | NW_003037920.1 | + | 61422     | 61470     |
| Sma-1-18258 | NW_003038258.1 | + | 126375    | 126423    |
| Sma-1-18259 | NW_003038258.1 | + | 166391    | 166439    |
| Sma-1-18260 | NW_003037995.1 | + | 205091    | 205139    |
| Sma-1-18261 | NW_003038250.1 | + | 206503    | 206551    |
| Sma-1-18262 | NW_003035876.1 | + | 126226    | 126274    |

|             |                |   |           |           |
|-------------|----------------|---|-----------|-----------|
| Sma-1-18263 | NW_003037793.1 | - | 3375173   | 3375125   |
| Sma-1-18264 | NW_003037796.1 | - | 778036    | 777988    |
| Sma-1-18265 | NW_003037796.1 | - | 188785    | 188737    |
| Sma-1-18266 | NW_003037797.1 | + | 1500922   | 1500970   |
| Sma-1-18267 | NW_003037800.1 | - | 250663    | 250615    |
| Sma-1-18268 | NW_003037806.1 | - | 748355    | 748307    |
| Sma-1-18269 | NW_003037814.1 | + | 765692    | 765740    |
| Sma-1-18270 | NW_003037826.1 | + | 628530    | 628578    |
| Sma-1-18271 | NW_003037829.1 | - | 508936    | 508888    |
| Sma-1-18272 | NW_003037838.1 | + | 301278    | 301326    |
| Sma-1-18273 | NW_003037844.1 | - | 260236    | 260188    |
| Sma-1-18274 | NW_003037852.1 | + | 319892    | 319940    |
| Sma-1-18275 | NW_003037854.1 | + | 743105    | 743153    |
| Sma-1-18276 | NW_003037854.1 | + | 1486901   | 1486949   |
| Sma-1-18277 | NW_003037866.1 | - | 524854    | 524806    |
| Sma-1-18278 | NW_003037880.1 | + | 642097    | 642145    |
| Sma-1-18279 | NW_003037905.1 | - | 195870    | 195822    |
| Sma-1-18280 | NW_003037914.1 | + | 1684626   | 1684674   |
| Sma-1-18281 | NW_003037917.1 | - | 1268354   | 1268306   |
| Sma-1-18282 | NW_003037928.1 | - | 163973    | 163925    |
| Sma-1-18283 | NW_003037940.1 | - | 88777     | 88729     |
| Sma-1-18284 | NW_003037964.1 | - | 455812    | 455764    |
| Sma-1-18285 | NW_003037969.1 | - | 262509    | 262461    |
| Sma-1-18286 | NW_003037972.1 | + | 680571    | 680619    |
| Sma-1-18287 | NW_003037978.1 | - | 329189    | 329141    |
| Sma-1-18288 | NW_003037994.1 | - | 402050    | 402002    |
| Sma-1-18289 | NW_003038017.1 | - | 543032    | 542984    |
| Sma-1-18290 | NW_003038028.1 | + | 677708    | 677756    |
| Sma-1-18291 | NW_003026515.1 | - | 197836    | 197788    |
| Sma-1-18292 | NW_003026517.1 | + | 293638    | 293686    |
| Sma-1-18293 | NW_003026517.1 | + | 459733    | 459781    |
| Sma-1-18294 | NW_003038161.1 | + | 204256    | 204304    |
| Sma-1-18295 | NS_000200.1    | + | 11928782  | 11928830  |
| Sma-1-18296 | NS_000200.1    | + | 43749552  | 43749600  |
| Sma-1-18297 | NS_000200.1    | + | 61628046  | 61628094  |
| Sma-1-18298 | NS_000200.1    | + | 78299841  | 78299889  |
| Sma-1-18299 | NS_000200.1    | + | 94711787  | 94711835  |
| Sma-1-18300 | NS_000200.1    | + | 97647526  | 97647574  |
| Sma-1-18301 | NS_000200.1    | + | 98391322  | 98391370  |
| Sma-1-18302 | NS_000200.1    | + | 124325655 | 124325703 |
| Sma-1-18303 | NS_000200.1    | + | 161828876 | 161828924 |
| Sma-1-18304 | NS_000200.1    | + | 169242229 | 169242277 |
| Sma-1-18305 | NS_000200.1    | + | 203156275 | 203156323 |
| Sma-1-18306 | NS_000200.1    | + | 219894859 | 219894907 |
| Sma-1-18307 | NS_000200.1    | + | 241985282 | 241985330 |
| Sma-1-18308 | NS_000200.1    | + | 253889824 | 253889872 |
| Sma-1-18309 | NS_000200.1    | + | 297574107 | 297574155 |
| Sma-1-18310 | NS_000200.1    | + | 299899647 | 299899695 |
| Sma-1-18311 | NS_000200.1    | + | 300065742 | 300065790 |
| Sma-1-18312 | NS_000200.1    | + | 307778826 | 307778874 |
| Sma-1-18313 | NS_000200.1    | + | 318259180 | 318259228 |
| Sma-1-18314 | NS_000200.1    | + | 322664885 | 322664933 |

|             |                |   |           |           |
|-------------|----------------|---|-----------|-----------|
| Sma-1-18315 | NS_000200.1    | + | 322704901 | 322704949 |
| Sma-1-18316 | NS_000200.1    | + | 327969698 | 327969746 |
| Sma-1-18317 | NS_000200.1    | + | 331787066 | 331787114 |
| Sma-1-18318 | NS_000200.1    | + | 336957726 | 336957774 |
| Sma-1-18319 | NS_000200.1    | + | 340062105 | 340062153 |
| Sma-1-18320 | NS_000200.1    | + | 377996361 | 377996409 |
| Sma-1-18321 | NS_000200.1    | - | 370693337 | 370693289 |
| Sma-1-18322 | NS_000200.1    | - | 370640155 | 370640107 |
| Sma-1-18323 | NS_000200.1    | - | 331327376 | 331327328 |
| Sma-1-18324 | NS_000200.1    | - | 330052793 | 330052745 |
| Sma-1-18325 | NS_000200.1    | - | 290842247 | 290842199 |
| Sma-1-18326 | NS_000200.1    | - | 232309063 | 232309015 |
| Sma-1-18327 | NS_000200.1    | - | 218933864 | 218933816 |
| Sma-1-18328 | NS_000200.1    | - | 209597199 | 209597151 |
| Sma-1-18329 | NS_000200.1    | - | 200868636 | 200868588 |
| Sma-1-18330 | NS_000200.1    | - | 198057334 | 198057286 |
| Sma-1-18331 | NS_000200.1    | - | 183830907 | 183830859 |
| Sma-1-18332 | NS_000200.1    | - | 174487926 | 174487878 |
| Sma-1-18333 | NS_000200.1    | - | 166305158 | 166305110 |
| Sma-1-18334 | NS_000200.1    | - | 149464882 | 149464834 |
| Sma-1-18335 | NS_000200.1    | - | 115870085 | 115870037 |
| Sma-1-18336 | NS_000200.1    | - | 112012653 | 112012605 |
| Sma-1-18337 | NS_000200.1    | - | 86443682  | 86443634  |
| Sma-1-18338 | NS_000200.1    | - | 66409474  | 66409426  |
| Sma-1-18339 | NS_000200.1    | - | 28943569  | 28943521  |
| Sma-1-18340 | NS_000200.1    | - | 18880023  | 18879975  |
| Sma-1-18341 | NS_000200.1    | - | 8987680   | 8987632   |
| Sma-1-18342 | NS_000200.1    | - | 8398429   | 8398381   |
| Sma-1-18343 | NS_000200.1    | - | 3375173   | 3375125   |
| Sma-1-18344 | NW_003037806.1 | + | 230115    | 230162    |
| Sma-1-18345 | NS_000200.1    | + | 28425329  | 28425376  |
| Sma-1-18346 | NW_003037908.1 | + | 922692    | 922740    |
| Sma-1-18347 | NW_003038106.1 | + | 45058     | 45106     |
| Sma-1-18348 | NS_000200.1    | + | 153395823 | 153395871 |
| Sma-1-18349 | NS_000200.1    | + | 275233823 | 275233871 |
| Sma-1-18350 | NW_003037880.1 | - | 642020    | 641972    |
| Sma-1-18351 | NS_000200.1    | - | 124325578 | 124325530 |
| Sma-1-18352 | NW_003038055.1 | + | 224798    | 224846    |
| Sma-1-18353 | NS_000200.1    | + | 258924120 | 258924168 |
| Sma-1-18354 | NW_003037873.1 | + | 410133    | 410181    |
| Sma-1-18355 | NS_000200.1    | + | 119149261 | 119149309 |
| Sma-1-18356 | NW_003037854.1 | - | 1865178   | 1865130   |
| Sma-1-18357 | NS_000200.1    | - | 98769599  | 98769551  |
| Sma-1-18358 | NW_003038118.1 | + | 277955    | 278003    |
| Sma-1-18359 | NS_000200.1    | + | 277842082 | 277842130 |
| Sma-1-18360 | NW_003026618.1 | - | 7016      | 6968      |
| Sma-1-18361 | NS_000200.1    | - | 321762018 | 321761970 |
| Sma-1-18362 | NW_003038006.1 | + | 54736     | 54784     |
| Sma-1-18363 | NW_003037975.1 | - | 407380    | 407332    |
| Sma-1-18364 | NS_000200.1    | + | 224939220 | 224939268 |
| Sma-1-18365 | NS_000200.1    | - | 205989604 | 205989556 |
| Sma-1-18366 | NW_003037854.1 | - | 30670     | 30622     |

|             |                |   |           |           |
|-------------|----------------|---|-----------|-----------|
| Sma-1-18367 | NS_000200.1    | - | 96935091  | 96935043  |
| Sma-1-18368 | NW_003036058.1 | + | 124       | 172       |
| Sma-1-18369 | NS_000200.1    | + | 343369538 | 343369586 |
| Sma-1-18370 | NW_003037794.1 | - | 1887346   | 1887298   |
| Sma-1-18371 | NS_000200.1    | - | 6066941   | 6066893   |
| Sma-1-18372 | NW_003038132.1 | - | 310660    | 310612    |
| Sma-1-18373 | NS_000200.1    | - | 282731130 | 282731082 |
| Sma-1-18374 | NW_003026462.1 | - | 497771    | 497723    |
| Sma-1-18375 | NS_000200.1    | - | 197165274 | 197165226 |
| Sma-1-18376 | NW_003037841.1 | + | 231003    | 231051    |
| Sma-1-18377 | NS_000200.1    | + | 82842184  | 82842232  |
| Sma-1-18378 | NW_003037863.1 | + | 1006616   | 1006664   |
| Sma-1-18379 | NW_003038008.1 | + | 193208    | 193256    |
| Sma-1-18380 | NS_000200.1    | + | 107764983 | 107765031 |
| Sma-1-18381 | NS_000200.1    | + | 225866304 | 225866352 |
| Sma-1-18382 | NW_003020781.1 | + | 207       | 255       |
| Sma-1-18383 | NS_000200.1    | + | 364445682 | 364445730 |
| Sma-1-18384 | NW_003026612.1 | - | 160478    | 160430    |
| Sma-1-18385 | NS_000200.1    | - | 312465865 | 312465817 |
| Sma-1-18386 | NW_003037900.1 | + | 147539    | 147587    |
| Sma-1-18387 | NS_000200.1    | + | 145276405 | 145276453 |
| Sma-1-18388 | NW_003037825.1 | - | 1767093   | 1767045   |
| Sma-1-18389 | NW_003037826.1 | - | 4506      | 4458      |
| Sma-1-18390 | NW_003037885.1 | - | 724769    | 724721    |
| Sma-1-18391 | NW_003037907.1 | + | 781032    | 781080    |
| Sma-1-18392 | NS_000200.1    | + | 152185521 | 152185569 |
| Sma-1-18393 | NS_000200.1    | - | 128822716 | 128822668 |
| Sma-1-18394 | NS_000200.1    | - | 61004022  | 61003974  |
| Sma-1-18395 | NS_000200.1    | - | 60896875  | 60896827  |
| Sma-1-18396 | NW_003037787.1 | + | 75974     | 76022     |
| Sma-1-18397 | NS_000200.1    | + | 380324143 | 380324191 |
| Sma-1-18398 | NW_003037939.1 | - | 389904    | 389856    |
| Sma-1-18399 | NS_000200.1    | - | 183259658 | 183259610 |
| Sma-1-18400 | NW_003037793.1 | + | 2976887   | 2976935   |
| Sma-1-18401 | NS_000200.1    | + | 2976887   | 2976935   |
| Sma-1-18402 | NW_003037793.1 | + | 2980103   | 2980151   |
| Sma-1-18403 | NS_000200.1    | + | 2980103   | 2980151   |
| Sma-1-18404 | NW_003037973.1 | - | 656937    | 656889    |
| Sma-1-18405 | NS_000200.1    | - | 204638664 | 204638616 |
| Sma-1-18406 | NW_003037973.1 | + | 438412    | 438460    |
| Sma-1-18407 | NW_003038011.1 | + | 580922    | 580970    |
| Sma-1-18408 | NS_000200.1    | + | 204420139 | 204420187 |
| Sma-1-18409 | NS_000200.1    | + | 228108572 | 228108620 |
| Sma-1-18410 | NW_003037797.1 | + | 740032    | 740080    |
| Sma-1-18411 | NS_000200.1    | + | 11167892  | 11167940  |
| Sma-1-18412 | NW_003037914.1 | + | 1672937   | 1672985   |
| Sma-1-18413 | NS_000200.1    | + | 161817187 | 161817235 |
| Sma-1-18414 | NW_003037854.1 | + | 1472754   | 1472802   |
| Sma-1-18415 | NS_000200.1    | + | 98377175  | 98377223  |
| Sma-1-18416 | NW_003038249.1 | + | 299706    | 299754    |
| Sma-1-18417 | NS_000200.1    | + | 316981959 | 316982007 |
| Sma-1-18418 | NW_003037887.1 | - | 258692    | 258644    |

|             |                |   |           |           |
|-------------|----------------|---|-----------|-----------|
| Sma-1-18419 | NS.000200.1    | - | 130722670 | 130722622 |
| Sma-1-18420 | NW_003037917.1 | - | 487774    | 487726    |
| Sma-1-18421 | NS.000200.1    | - | 165524578 | 165524530 |
| Sma-1-18422 | NW_003037816.1 | + | 536690    | 536738    |
| Sma-1-18423 | NW_003037838.1 | + | 357488    | 357536    |
| Sma-1-18424 | NS.000200.1    | + | 46745562  | 46745610  |
| Sma-1-18425 | NS.000200.1    | + | 78356051  | 78356099  |
| Sma-1-18426 | NW_003037791.1 | - | 680698    | 680650    |
| Sma-1-18427 | NS.000200.1    | - | 382386126 | 382386078 |
| Sma-1-18428 | NW_003037913.1 | + | 1326770   | 1326818   |
| Sma-1-18429 | NS.000200.1    | + | 159890521 | 159890569 |
| Sma-1-18430 | NW_003033840.1 | - | 807       | 759       |
| Sma-1-18431 | NW_003037938.1 | + | 548338    | 548386    |
| Sma-1-18432 | NS.000200.1    | + | 182585451 | 182585499 |
| Sma-1-18433 | NS.000200.1    | - | 359245234 | 359245186 |
| Sma-1-18434 | NW_003038033.1 | - | 862187    | 862139    |
| Sma-1-18435 | NS.000200.1    | - | 246842189 | 246842141 |
| Sma-1-18436 | NW_003037932.1 | - | 874892    | 874844    |
| Sma-1-18437 | NS.000200.1    | - | 178408088 | 178408040 |
| Sma-1-18438 | NW_003037827.1 | - | 2259063   | 2259015   |
| Sma-1-18439 | NS.000200.1    | - | 64881204  | 64881156  |
| Sma-1-18440 | NW_003037825.1 | - | 1210388   | 1210340   |
| Sma-1-18441 | NW_003037909.1 | + | 297722    | 297770    |
| Sma-1-18442 | NS.000200.1    | + | 153839371 | 153839419 |
| Sma-1-18443 | NS.000200.1    | - | 60340170  | 60340122  |
| Sma-1-18444 | NW_003037976.1 | + | 54347     | 54395     |
| Sma-1-18445 | NS.000200.1    | + | 206668662 | 206668710 |
| Sma-1-18446 | NW_003037882.1 | + | 405708    | 405756    |
| Sma-1-18447 | NS.000200.1    | + | 125697382 | 125697430 |
| Sma-1-18448 | NW_003033883.1 | + | 626       | 674       |
| Sma-1-18449 | NS.000200.1    | + | 359388340 | 359388388 |
| Sma-1-18450 | NW_003037835.1 | - | 1150569   | 1150521   |
| Sma-1-18451 | NS.000200.1    | - | 75547077  | 75547029  |
| Sma-1-18452 | NW_003022453.1 | + | 1062      | 1110      |
| Sma-1-18453 | NW_003037812.1 | + | 1103635   | 1103683   |
| Sma-1-18454 | NW_003037852.1 | - | 753660    | 753612    |
| Sma-1-18455 | NS.000200.1    | + | 40586374  | 40586422  |
| Sma-1-18456 | NS.000200.1    | + | 364970827 | 364970875 |
| Sma-1-18457 | NS.000200.1    | - | 95145555  | 95145507  |
| Sma-1-18458 | NW_003037918.1 | - | 1852154   | 1852106   |
| Sma-1-18459 | NS.000200.1    | - | 168419144 | 168419096 |
| Sma-1-18460 | NW_003037905.1 | + | 342022    | 342070    |
| Sma-1-18461 | NS.000200.1    | + | 149611034 | 149611082 |
| Sma-1-18462 | NW_003038515.1 | + | 223798    | 223846    |
| Sma-1-18463 | NS.000200.1    | + | 340307863 | 340307911 |
| Sma-1-18464 | NW_003037874.1 | + | 260913    | 260961    |
| Sma-1-18465 | NW_003037797.1 | - | 1864035   | 1863987   |
| Sma-1-18466 | NS.000200.1    | + | 119685863 | 119685911 |
| Sma-1-18467 | NS.000200.1    | - | 12291895  | 12291847  |
| Sma-1-18468 | NW_003038260.1 | - | 2040      | 1992      |
| Sma-1-18469 | NS.000200.1    | - | 323173815 | 323173767 |
| Sma-1-18470 | NW_003038497.1 | - | 4218      | 4170      |

|             |                |   |           |           |
|-------------|----------------|---|-----------|-----------|
| Sma-1-18471 | NS_000200.1    | - | 334389076 | 334389028 |
| Sma-1-18472 | NW_003039130.1 | - | 13837     | 13789     |
| Sma-1-18473 | NS_000200.1    | - | 317688448 | 317688400 |
| Sma-1-18474 | NW_003026464.1 | - | 556883    | 556835    |
| Sma-1-18475 | NS_000200.1    | - | 203857192 | 203857144 |
| Sma-1-18476 | NW_003037790.1 | - | 198656    | 198608    |
| Sma-1-18477 | NS_000200.1    | - | 381542828 | 381542780 |
| Sma-1-18478 | NW_003037827.1 | + | 394348    | 394396    |
| Sma-1-18479 | NW_003037827.1 | + | 1577892   | 1577940   |
| Sma-1-18480 | NW_003037850.1 | + | 797513    | 797561    |
| Sma-1-18481 | NS_000200.1    | + | 63016489  | 63016537  |
| Sma-1-18482 | NS_000200.1    | + | 64200033  | 64200081  |
| Sma-1-18483 | NS_000200.1    | + | 92783543  | 92783591  |
| Sma-1-18484 | NW_003037833.1 | + | 167586    | 167634    |
| Sma-1-18485 | NW_003037860.1 | - | 568720    | 568672    |
| Sma-1-18486 | NS_000200.1    | + | 72358682  | 72358730  |
| Sma-1-18487 | NS_000200.1    | - | 104311748 | 104311700 |
| Sma-1-18488 | NW_003035880.1 | + | 270143    | 270191    |
| Sma-1-18489 | NS_000200.1    | + | 339511207 | 339511255 |
| Sma-1-18490 | NW_003037794.1 | + | 1352061   | 1352107   |
| Sma-1-18491 | NS_000200.1    | + | 5531656   | 5531702   |
| Sma-1-18492 | NW_003038137.1 | - | 133749    | 133701    |
| Sma-1-18493 | NS_000200.1    | - | 284922645 | 284922597 |
| Sma-1-18494 | NW_003038027.1 | + | 673224    | 673272    |
| Sma-1-18495 | NS_000200.1    | + | 241043938 | 241043986 |
| Sma-1-18496 | NW_003037962.1 | + | 286864    | 286912    |
| Sma-1-18497 | NS_000200.1    | + | 196363707 | 196363755 |
| Sma-1-18498 | NW_003037873.1 | + | 30934     | 30982     |
| Sma-1-18499 | NW_003037795.1 | - | 1340980   | 1340932   |
| Sma-1-18500 | NW_003038239.1 | + | 241112    | 241160    |
| Sma-1-18501 | NS_000200.1    | + | 118770062 | 118770110 |
| Sma-1-18502 | NS_000200.1    | + | 314081894 | 314081942 |
| Sma-1-18503 | NS_000200.1    | - | 7731863   | 7731815   |
| Sma-1-18504 | NW_003038028.1 | + | 95312     | 95360     |
| Sma-1-18505 | NS_000200.1    | + | 241402886 | 241402934 |
| Sma-1-18506 | NW_003038041.1 | - | 170849    | 170801    |
| Sma-1-18507 | NS_000200.1    | - | 253838131 | 253838083 |
| Sma-1-18508 | NW_003028347.1 | - | 393       | 345       |
| Sma-1-18509 | NW_003035872.1 | + | 34546     | 34594     |
| Sma-1-18510 | NW_003035880.1 | + | 57047     | 57095     |
| Sma-1-18511 | NW_003038521.1 | + | 5434      | 5482      |
| Sma-1-18512 | NW_003037774.1 | + | 42345     | 42393     |
| Sma-1-18513 | NW_003037929.1 | - | 547891    | 547843    |
| Sma-1-18514 | NW_003026615.1 | - | 42977     | 42929     |
| Sma-1-18515 | NW_003032160.1 | + | 64924     | 64972     |
| Sma-1-18516 | NW_003037797.1 | - | 2556169   | 2556121   |
| Sma-1-18517 | NW_003037809.1 | - | 2187304   | 2187256   |
| Sma-1-18518 | NW_003037811.1 | + | 748280    | 748328    |
| Sma-1-18519 | NW_003037812.1 | - | 454830    | 454782    |
| Sma-1-18520 | NW_003037819.1 | - | 1167445   | 1167397   |
| Sma-1-18521 | NW_003037825.1 | + | 1463835   | 1463883   |
| Sma-1-18522 | NW_003037825.1 | + | 1486979   | 1487027   |



|             |                |   |           |           |
|-------------|----------------|---|-----------|-----------|
| Sma-1-18523 | NW_003037830.1 | + | 43619     | 43667     |
| Sma-1-18524 | NW_003037830.1 | - | 1548970   | 1548922   |
| Sma-1-18525 | NW_003037830.1 | - | 42478     | 42430     |
| Sma-1-18526 | NW_003037845.1 | + | 585685    | 585733    |
| Sma-1-18527 | NW_003037854.1 | + | 707301    | 707349    |
| Sma-1-18528 | NW_003037904.1 | - | 214638    | 214590    |
| Sma-1-18529 | NW_003037933.1 | + | 447436    | 447484    |
| Sma-1-18530 | NW_003038019.1 | - | 226071    | 226023    |
| Sma-1-18531 | NS_000200.1    | + | 38918522  | 38918570  |
| Sma-1-18532 | NS_000200.1    | + | 60593617  | 60593665  |
| Sma-1-18533 | NS_000200.1    | + | 60616761  | 60616809  |
| Sma-1-18534 | NS_000200.1    | + | 67933990  | 67934038  |
| Sma-1-18535 | NS_000200.1    | + | 87587588  | 87587636  |
| Sma-1-18536 | NS_000200.1    | + | 97611722  | 97611770  |
| Sma-1-18537 | NS_000200.1    | + | 178860608 | 178860656 |
| Sma-1-18538 | NS_000200.1    | + | 335656293 | 335656341 |
| Sma-1-18539 | NS_000200.1    | + | 339298111 | 339298159 |
| Sma-1-18540 | NS_000200.1    | + | 342873181 | 342873229 |
| Sma-1-18541 | NS_000200.1    | + | 378627722 | 378627770 |
| Sma-1-18542 | NS_000200.1    | + | 381073010 | 381073058 |
| Sma-1-18543 | NS_000200.1    | - | 369423293 | 369423245 |
| Sma-1-18544 | NS_000200.1    | - | 317037418 | 317037370 |
| Sma-1-18545 | NS_000200.1    | - | 233542889 | 233542841 |
| Sma-1-18546 | NS_000200.1    | - | 175788669 | 175788621 |
| Sma-1-18547 | NS_000200.1    | - | 148929137 | 148929089 |
| Sma-1-18548 | NS_000200.1    | - | 69439341  | 69439293  |
| Sma-1-18549 | NS_000200.1    | - | 67932849  | 67932801  |
| Sma-1-18550 | NS_000200.1    | - | 52255710  | 52255662  |
| Sma-1-18551 | NS_000200.1    | - | 39937569  | 39937521  |
| Sma-1-18552 | NS_000200.1    | - | 35851768  | 35851720  |
| Sma-1-18553 | NS_000200.1    | - | 12984029  | 12983981  |
| Sma-1-18554 | NW_003037851.1 | - | 613878    | 613830    |
| Sma-1-18555 | NS_000200.1    | - | 94017188  | 94017140  |
| Sma-1-18556 | NW_003038037.1 | - | 837776    | 837728    |
| Sma-1-18557 | NS_000200.1    | - | 250993185 | 250993137 |
| Sma-1-18558 | NW_003037924.1 | - | 135229    | 135181    |
| Sma-1-18559 | NS_000200.1    | - | 171842187 | 171842139 |
| Sma-1-18560 | NW_003037964.1 | + | 192665    | 192713    |
| Sma-1-18561 | NS_000200.1    | + | 197794187 | 197794235 |
| Sma-1-18562 | NW_003037831.1 | - | 306039    | 305991    |
| Sma-1-18563 | NS_000200.1    | - | 69755341  | 69755293  |
| Sma-1-18564 | NW_003038442.1 | + | 47115     | 47166     |
| Sma-1-18565 | NS_000200.1    | + | 329903168 | 329903219 |
| Sma-1-18566 | NW_003037981.1 | + | 944254    | 944302    |
| Sma-1-18567 | NS_000200.1    | + | 213342122 | 213342170 |
| Sma-1-18568 | NW_003025155.1 | + | 753       | 801       |
| Sma-1-18569 | NW_003037866.1 | - | 1047221   | 1047173   |
| Sma-1-18570 | NW_003037918.1 | + | 610956    | 611004    |
| Sma-1-18571 | NW_003037933.1 | - | 602274    | 602226    |
| Sma-1-18572 | NS_000200.1    | + | 167177946 | 167177994 |
| Sma-1-18573 | NS_000200.1    | + | 361281888 | 361281936 |
| Sma-1-18574 | NS_000200.1    | - | 179015446 | 179015398 |

|             |                |   |           |           |
|-------------|----------------|---|-----------|-----------|
| Sma-1-18575 | NS_000200.1    | - | 112535020 | 112534972 |
| Sma-1-18576 | NW_003038042.1 | + | 195095    | 195143    |
| Sma-1-18577 | NS_000200.1    | + | 254140694 | 254140742 |
| Sma-1-18578 | NW_003037933.1 | - | 155166    | 155118    |
| Sma-1-18579 | NS_000200.1    | - | 178568338 | 178568290 |
| Sma-1-18580 | NW_003037935.1 | - | 183833    | 183785    |
| Sma-1-18581 | NS_000200.1    | - | 179600368 | 179600320 |
| Sma-1-18582 | NW_003026471.1 | + | 173441    | 173489    |
| Sma-1-18583 | NS_000200.1    | + | 222285674 | 222285722 |
| Sma-1-18584 | NW_003037886.1 | + | 1043422   | 1043470   |
| Sma-1-18585 | NS_000200.1    | + | 130298989 | 130299037 |
| Sma-1-18586 | NW_003038141.1 | - | 239103    | 239052    |
| Sma-1-18587 | NS_000200.1    | - | 287129082 | 287129031 |
| Sma-1-18588 | NW_003037834.1 | - | 864038    | 863990    |
| Sma-1-18589 | NS_000200.1    | - | 74024524  | 74024476  |
| Sma-1-18590 | NW_003038157.1 | + | 502219    | 502267    |
| Sma-1-18591 | NS_000200.1    | + | 295753139 | 295753187 |
| Sma-1-18592 | NW_003039127.1 | - | 433590    | 433542    |
| Sma-1-18593 | NS_000200.1    | - | 113511089 | 113511041 |
| Sma-1-18594 | NW_003037854.1 | - | 401791    | 401743    |
| Sma-1-18595 | NS_000200.1    | - | 97306212  | 97306164  |
| Sma-1-18596 | NW_003038025.1 | + | 67332     | 67380     |
| Sma-1-18597 | NS_000200.1    | + | 238925577 | 238925625 |
| Sma-1-18598 | NW_003038255.1 | - | 29442     | 29394     |
| Sma-1-18599 | NS_000200.1    | - | 320418587 | 320418539 |
| Sma-1-18600 | NW_003037793.1 | + | 2895297   | 2895345   |
| Sma-1-18601 | NW_003037854.1 | + | 761075    | 761123    |
| Sma-1-18602 | NS_000200.1    | + | 2895297   | 2895345   |
| Sma-1-18603 | NS_000200.1    | + | 97665496  | 97665544  |
| Sma-1-18604 | NW_003026471.1 | + | 129107    | 129155    |
| Sma-1-18605 | NS_000200.1    | + | 222241340 | 222241388 |
| Sma-1-18606 | NW_003037796.1 | - | 1027354   | 1027306   |
| Sma-1-18607 | NS_000200.1    | - | 9236998   | 9236950   |
| Sma-1-18608 | NW_003037796.1 | + | 1100359   | 1100407   |
| Sma-1-18609 | NS_000200.1    | + | 9310003   | 9310051   |
| Sma-1-18610 | NW_003037801.1 | - | 499670    | 499622    |
| Sma-1-18611 | NW_003037942.1 | - | 660404    | 660356    |
| Sma-1-18612 | NS_000200.1    | - | 186420312 | 186420264 |
| Sma-1-18613 | NS_000200.1    | - | 21589150  | 21589102  |
| Sma-1-18614 | NW_003037819.1 | + | 929924    | 929972    |
| Sma-1-18615 | NS_000200.1    | + | 52018189  | 52018237  |
| Sma-1-18616 | NW_003037804.1 | + | 1195397   | 1195445   |
| Sma-1-18617 | NS_000200.1    | + | 26335417  | 26335465  |
| Sma-1-18618 | NW_003037804.1 | - | 785974    | 785926    |
| Sma-1-18619 | NW_003037973.1 | + | 317542    | 317590    |
| Sma-1-18620 | NS_000200.1    | + | 204299269 | 204299317 |
| Sma-1-18621 | NS_000200.1    | - | 25925994  | 25925946  |
| Sma-1-18622 | NW_003037808.1 | - | 281288    | 281240    |
| Sma-1-18623 | NS_000200.1    | - | 32067925  | 32067877  |
| Sma-1-18624 | NW_003037797.1 | + | 3224504   | 3224552   |
| Sma-1-18625 | NS_000200.1    | + | 13652364  | 13652412  |
| Sma-1-18626 | NW_003037797.1 | + | 1876397   | 1876445   |

|             |                |   |           |           |
|-------------|----------------|---|-----------|-----------|
| Sma-1-18627 | NS.000200.1    | + | 12304257  | 12304305  |
| Sma-1-18628 | NW_003037793.1 | - | 242463    | 242415    |
| Sma-1-18629 | NS.000200.1    | - | 242463    | 242415    |
| Sma-1-18630 | NW_003038133.1 | + | 244663    | 244711    |
| Sma-1-18631 | NS.000200.1    | + | 283116845 | 283116893 |
| Sma-1-18632 | NW_003038013.1 | - | 74285     | 74237     |
| Sma-1-18633 | NS.000200.1    | - | 229463911 | 229463863 |
| Sma-1-18634 | NW_003038192.1 | - | 64209     | 64161     |
| Sma-1-18635 | NS.000200.1    | - | 302626116 | 302626068 |
| Sma-1-18636 | NW_003037975.1 | - | 619243    | 619195    |
| Sma-1-18637 | NS.000200.1    | - | 206201467 | 206201419 |
| Sma-1-18638 | NW_003037806.1 | - | 257704    | 257656    |
| Sma-1-18639 | NS.000200.1    | - | 28452918  | 28452870  |
| Sma-1-18640 | NW_003037917.1 | - | 1501950   | 1501902   |
| Sma-1-18641 | NS.000200.1    | - | 166538754 | 166538706 |
| Sma-1-18642 | NW_003037793.1 | + | 2066624   | 2066672   |
| Sma-1-18643 | NS.000200.1    | + | 2066624   | 2066672   |
| Sma-1-18644 | NW_003037874.1 | - | 427384    | 427336    |
| Sma-1-18645 | NS.000200.1    | - | 119852334 | 119852286 |
| Sma-1-18646 | NW_003037798.1 | + | 308979    | 309027    |
| Sma-1-18647 | NS.000200.1    | + | 14568137  | 14568185  |
| Sma-1-18648 | NW_003037924.1 | + | 606409    | 606457    |
| Sma-1-18649 | NS.000200.1    | + | 172313367 | 172313415 |
| Sma-1-18650 | NW_003037852.1 | - | 660030    | 659982    |
| Sma-1-18651 | NS.000200.1    | - | 95051925  | 95051877  |
| Sma-1-18652 | NW_003038059.1 | + | 307570    | 307618    |
| Sma-1-18653 | NS.000200.1    | + | 260549642 | 260549690 |
| Sma-1-18654 | NW_003037827.1 | + | 302690    | 302738    |
| Sma-1-18655 | NS.000200.1    | + | 62924831  | 62924879  |
| Sma-1-18656 | NW_003038511.1 | + | 45606     | 45654     |
| Sma-1-18657 | NS.000200.1    | + | 338390818 | 338390866 |
| Sma-1-18658 | NW_003037852.1 | - | 659395    | 659347    |
| Sma-1-18659 | NS.000200.1    | - | 95051290  | 95051242  |
| Sma-1-18660 | NW_003037796.1 | + | 344328    | 344376    |
| Sma-1-18661 | NS.000200.1    | + | 8553972   | 8554020   |
| Sma-1-18662 | NW_003037936.1 | + | 544315    | 544363    |
| Sma-1-18663 | NS.000200.1    | + | 180984044 | 180984092 |
| Sma-1-18664 | NW_003037933.1 | - | 47050     | 47002     |
| Sma-1-18665 | NS.000200.1    | - | 178460222 | 178460174 |
| Sma-1-18666 | NW_003038251.1 | + | 404809    | 404857    |
| Sma-1-18667 | NS.000200.1    | + | 318736581 | 318736629 |
| Sma-1-18668 | NW_003032075.1 | - | 7064      | 7016      |
| Sma-1-18669 | NS.000200.1    | - | 377096660 | 377096612 |
| Sma-1-18670 | NW_003038016.1 | - | 128700    | 128652    |
| Sma-1-18671 | NS.000200.1    | - | 231245237 | 231245189 |
| Sma-1-18672 | NW_003038115.1 | - | 102173    | 102125    |
| Sma-1-18673 | NS.000200.1    | - | 277157468 | 277157420 |
| Sma-1-18674 | NW_003037975.1 | - | 506325    | 506277    |
| Sma-1-18675 | NS.000200.1    | - | 206088549 | 206088501 |
| Sma-1-18676 | NW_003038063.1 | + | 112059    | 112107    |
| Sma-1-18677 | NS.000200.1    | + | 261608337 | 261608385 |
| Sma-1-18678 | NW_003026591.1 | - | 23869     | 23821     |

|             |                |   |           |           |
|-------------|----------------|---|-----------|-----------|
| Sma-1-18679 | NS.000200.1    | - | 303972697 | 303972649 |
| Sma-1-18680 | NW_003038131.1 | - | 17141     | 17093     |
| Sma-1-18681 | NS.000200.1    | - | 281978985 | 281978937 |
| Sma-1-18682 | NW_003037795.1 | + | 220062    | 220110    |
| Sma-1-18683 | NS.000200.1    | + | 6610945   | 6610993   |
| Sma-1-18684 | NW_003037816.1 | + | 204582    | 204630    |
| Sma-1-18685 | NS.000200.1    | + | 46413454  | 46413502  |
| Sma-1-18686 | NW_003037857.1 | + | 353778    | 353826    |
| Sma-1-18687 | NS.000200.1    | + | 100374135 | 100374183 |
| Sma-1-18688 | NW_003037853.1 | + | 143611    | 143659    |
| Sma-1-18689 | NS.000200.1    | + | 95635662  | 95635710  |
| Sma-1-18690 | NW_003037862.1 | + | 581651    | 581699    |
| Sma-1-18691 | NS.000200.1    | + | 106233312 | 106233360 |
| Sma-1-18692 | NW_003037805.1 | - | 1360415   | 1360367   |
| Sma-1-18693 | NS.000200.1    | - | 27918259  | 27918211  |
| Sma-1-18694 | NW_003037805.1 | - | 1362243   | 1362195   |
| Sma-1-18695 | NS.000200.1    | - | 27920087  | 27920039  |
| Sma-1-18696 | NW_003038011.1 | + | 13905     | 13953     |
| Sma-1-18697 | NS.000200.1    | + | 227541555 | 227541603 |
| Sma-1-18698 | NW_003037853.1 | - | 174834    | 174786    |
| Sma-1-18699 | NS.000200.1    | - | 95666885  | 95666837  |
| Sma-1-18700 | NW_003037975.1 | + | 1006552   | 1006600   |
| Sma-1-18701 | NS.000200.1    | + | 206588776 | 206588824 |
| Sma-1-18702 | NW_003035361.1 | - | 467       | 419       |
| Sma-1-18703 | NW_003038137.1 | - | 234535    | 234487    |
| Sma-1-18704 | NS.000200.1    | - | 367338375 | 367338327 |
| Sma-1-18705 | NS.000200.1    | - | 285023431 | 285023383 |
| Sma-1-18706 | NW_003039127.1 | + | 2510113   | 2510161   |
| Sma-1-18707 | NS.000200.1    | + | 115587612 | 115587660 |
| Sma-1-18708 | NW_003037825.1 | - | 450261    | 450213    |
| Sma-1-18709 | NS.000200.1    | - | 59580043  | 59579995  |
| Sma-1-18710 | NW_003037971.1 | - | 488443    | 488395    |
| Sma-1-18711 | NS.000200.1    | - | 202110493 | 202110445 |
| Sma-1-18712 | NW_003037847.1 | + | 986091    | 986139    |
| Sma-1-18713 | NS.000200.1    | + | 89637821  | 89637869  |
| Sma-1-18714 | NW_003026516.1 | + | 162760    | 162808    |
| Sma-1-18715 | NS.000200.1    | + | 299271057 | 299271105 |
| Sma-1-18716 | NW_003037853.1 | - | 407033    | 406985    |
| Sma-1-18717 | NS.000200.1    | - | 95899084  | 95899036  |
| Sma-1-18718 | NW_003038188.1 | + | 74555     | 74603     |
| Sma-1-18719 | NS.000200.1    | + | 302168298 | 302168346 |
| Sma-1-18720 | NW_003037852.1 | - | 229294    | 229246    |
| Sma-1-18721 | NS.000200.1    | - | 94621189  | 94621141  |
| Sma-1-18722 | NW_003037933.1 | - | 291388    | 291340    |
| Sma-1-18723 | NS.000200.1    | - | 178704560 | 178704512 |
| Sma-1-18724 | NW_003037890.1 | + | 1335551   | 1335599   |
| Sma-1-18725 | NS.000200.1    | + | 137018912 | 137018960 |
| Sma-1-18726 | NW_003037884.1 | - | 533197    | 533149    |
| Sma-1-18727 | NS.000200.1    | - | 127312862 | 127312814 |
| Sma-1-18728 | NW_003037910.1 | + | 1128092   | 1128140   |
| Sma-1-18729 | NS.000200.1    | + | 155640067 | 155640115 |
| Sma-1-18730 | NW_003037793.1 | + | 3784362   | 3784410   |

|             |                |   |           |           |
|-------------|----------------|---|-----------|-----------|
| Sma-1-18731 | NS_000200.1    | + | 3784362   | 3784410   |
| Sma-1-18732 | NW_003038007.1 | + | 153026    | 153074    |
| Sma-1-18733 | NS_000200.1    | + | 225401581 | 225401629 |
| Sma-1-18734 | NW_003037837.1 | + | 287844    | 287892    |
| Sma-1-18735 | NW_003038047.1 | + | 92098     | 92146     |
| Sma-1-18736 | NS_000200.1    | + | 77093702  | 77093750  |
| Sma-1-18737 | NS_000200.1    | + | 255342097 | 255342145 |
| Sma-1-18738 | NW_003038144.1 | - | 109989    | 109941    |
| Sma-1-18739 | NS_000200.1    | - | 288374365 | 288374317 |
| Sma-1-18740 | NW_003038065.1 | + | 277227    | 277275    |
| Sma-1-18741 | NS_000200.1    | + | 262428844 | 262428892 |
| Sma-1-18742 | NW_003026607.1 | + | 124748    | 124796    |
| Sma-1-18743 | NS_000200.1    | + | 308157133 | 308157181 |
| Sma-1-18744 | NW_003038200.1 | - | 10120     | 10072     |
| Sma-1-18745 | NS_000200.1    | - | 303609414 | 303609366 |
| Sma-1-18746 | NW_003037813.1 | + | 1181778   | 1181826   |
| Sma-1-18747 | NS_000200.1    | + | 42168641  | 42168689  |
| Sma-1-18748 | NW_003037827.1 | - | 2252123   | 2252075   |
| Sma-1-18749 | NS_000200.1    | - | 64874264  | 64874216  |
| Sma-1-18750 | NW_003037975.1 | - | 997171    | 997123    |
| Sma-1-18751 | NS_000200.1    | - | 206579395 | 206579347 |
| Sma-1-18752 | NW_003037827.1 | - | 2199024   | 2198976   |
| Sma-1-18753 | NS_000200.1    | - | 64821165  | 64821117  |
| Sma-1-18754 | NW_003037827.1 | + | 192584    | 192632    |
| Sma-1-18755 | NS_000200.1    | + | 62814725  | 62814773  |
| Sma-1-18756 | NW_003037853.1 | - | 710150    | 710102    |
| Sma-1-18757 | NS_000200.1    | - | 96202201  | 96202153  |
| Sma-1-18758 | NW_003037827.1 | + | 1713119   | 1713167   |
| Sma-1-18759 | NS_000200.1    | + | 64335260  | 64335308  |
| Sma-1-18760 | NW_003037854.1 | - | 1472137   | 1472089   |
| Sma-1-18761 | NS_000200.1    | - | 98376558  | 98376510  |
| Sma-1-18762 | NW_003038014.1 | - | 369951    | 369903    |
| Sma-1-18763 | NS_000200.1    | - | 230110640 | 230110592 |
| Sma-1-18764 | NW_003037795.1 | - | 1333130   | 1333082   |
| Sma-1-18765 | NS_000200.1    | - | 7724013   | 7723965   |
| Sma-1-18766 | NW_003037827.1 | - | 1471907   | 1471859   |
| Sma-1-18767 | NS_000200.1    | - | 64094048  | 64094000  |
| Sma-1-18768 | NW_003037915.1 | - | 1267414   | 1267366   |
| Sma-1-18769 | NS_000200.1    | - | 163167400 | 163167352 |
| Sma-1-18770 | NW_003038049.1 | - | 243396    | 243348    |
| Sma-1-18771 | NS_000200.1    | - | 256218923 | 256218875 |
| Sma-1-18772 | NW_003034442.1 | - | 1499      | 1451      |
| Sma-1-18773 | NS_000200.1    | - | 346732099 | 346732051 |
| Sma-1-18774 | NW_003037937.1 | - | 721569    | 721521    |
| Sma-1-18775 | NS_000200.1    | - | 181921478 | 181921430 |
| Sma-1-18776 | NW_003038067.1 | - | 90939     | 90891     |
| Sma-1-18777 | NS_000200.1    | - | 262944992 | 262944944 |
| Sma-1-18778 | NW_003038241.1 | - | 186494    | 186446    |
| Sma-1-18779 | NS_000200.1    | - | 314649199 | 314649151 |
| Sma-1-18780 | NW_003021345.1 | + | 2620      | 2668      |
| Sma-1-18781 | NS_000200.1    | + | 343904618 | 343904666 |
| Sma-1-18782 | NW_003037937.1 | + | 666310    | 666358    |

|             |                |   |           |           |
|-------------|----------------|---|-----------|-----------|
| Sma-1-18783 | NS_000200.1    | + | 181866219 | 181866267 |
| Sma-1-18784 | NW_003037809.1 | - | 2164321   | 2164273   |
| Sma-1-18785 | NW_003037862.1 | + | 2649      | 2697      |
| Sma-1-18786 | NS_000200.1    | + | 105654310 | 105654358 |
| Sma-1-18787 | NS_000200.1    | - | 35828785  | 35828737  |
| Sma-1-18788 | NW_003037795.1 | + | 1131624   | 1131672   |
| Sma-1-18789 | NS_000200.1    | + | 7522507   | 7522555   |
| Sma-1-18790 | NW_003037859.1 | + | 767441    | 767489    |
| Sma-1-18791 | NS_000200.1    | + | 103446282 | 103446330 |
| Sma-1-18792 | NW_003037982.1 | + | 1326496   | 1326544   |
| Sma-1-18793 | NS_000200.1    | + | 214985691 | 214985739 |
| Sma-1-18794 | NW_003037807.1 | - | 616044    | 615996    |
| Sma-1-18795 | NS_000200.1    | - | 30877560  | 30877512  |
| Sma-1-18796 | NW_003026609.1 | - | 48141     | 48093     |
| Sma-1-18797 | NS_000200.1    | - | 309703133 | 309703085 |
| Sma-1-18798 | NW_003038015.1 | - | 715276    | 715228    |
| Sma-1-18799 | NS_000200.1    | - | 231038766 | 231038718 |
| Sma-1-18800 | NW_003037884.1 | - | 894284    | 894236    |
| Sma-1-18801 | NW_003026575.1 | + | 82841     | 82889     |
| Sma-1-18802 | NS_000200.1    | + | 302314507 | 302314555 |
| Sma-1-18803 | NS_000200.1    | - | 127673949 | 127673901 |
| Sma-1-18804 | NW_003038152.1 | + | 345878    | 345926    |
| Sma-1-18805 | NS_000200.1    | + | 292951602 | 292951650 |
| Sma-1-18806 | NW_003037909.1 | + | 238837    | 238885    |
| Sma-1-18807 | NS_000200.1    | + | 153780486 | 153780534 |
| Sma-1-18808 | NW_003037871.1 | + | 405778    | 405826    |
| Sma-1-18809 | NS_000200.1    | + | 117853516 | 117853564 |
| Sma-1-18810 | NW_003037967.1 | - | 589802    | 589754    |
| Sma-1-18811 | NS_000200.1    | - | 199829773 | 199829725 |
| Sma-1-18812 | NW_003037890.1 | - | 823811    | 823763    |
| Sma-1-18813 | NS_000200.1    | - | 136507172 | 136507124 |
| Sma-1-18814 | NW_003037908.1 | - | 702618    | 702570    |
| Sma-1-18815 | NS_000200.1    | - | 153175749 | 153175701 |
| Sma-1-18816 | NW_003038135.1 | + | 235262    | 235310    |
| Sma-1-18817 | NS_000200.1    | + | 284107601 | 284107649 |
| Sma-1-18818 | NW_003037972.1 | + | 249319    | 249367    |
| Sma-1-18819 | NS_000200.1    | + | 202725023 | 202725071 |
| Sma-1-18820 | NW_003037890.1 | + | 975245    | 975293    |
| Sma-1-18821 | NS_000200.1    | + | 136658606 | 136658654 |
| Sma-1-18822 | NW_003026610.1 | - | 52593     | 52545     |
| Sma-1-18823 | NS_000200.1    | - | 310207963 | 310207915 |
| Sma-1-18824 | NW_003037794.1 | + | 1967421   | 1967469   |
| Sma-1-18825 | NS_000200.1    | + | 6147016   | 6147064   |
| Sma-1-18826 | NW_003038022.1 | - | 43880     | 43832     |
| Sma-1-18827 | NS_000200.1    | - | 235724722 | 235724674 |
| Sma-1-18828 | NW_003038161.1 | + | 45016     | 45064     |
| Sma-1-18829 | NS_000200.1    | + | 297414867 | 297414915 |
| Sma-1-18830 | NW_003038017.1 | + | 459375    | 459423    |
| Sma-1-18831 | NS_000200.1    | + | 232225406 | 232225454 |
| Sma-1-18832 | NW_003037916.1 | - | 328577    | 328529    |
| Sma-1-18833 | NS_000200.1    | - | 163521988 | 163521940 |
| Sma-1-18834 | NW_003037830.1 | + | 72267     | 72315     |

|             |                |   |           |           |
|-------------|----------------|---|-----------|-----------|
| Sma-1-18835 | NS_000200.1    | + | 67962638  | 67962686  |
| Sma-1-18836 | NW_003037796.1 | - | 1360075   | 1360027   |
| Sma-1-18837 | NS_000200.1    | - | 9569719   | 9569671   |
| Sma-1-18838 | NW_003026611.1 | + | 148669    | 148717    |
| Sma-1-18839 | NS_000200.1    | + | 310718453 | 310718501 |
| Sma-1-18840 | NW_003037797.1 | + | 1318573   | 1318621   |
| Sma-1-18841 | NW_003037804.1 | + | 855633    | 855681    |
| Sma-1-18842 | NS_000200.1    | + | 11746433  | 11746481  |
| Sma-1-18843 | NS_000200.1    | + | 25995653  | 25995701  |
| Sma-1-18844 | NW_003026611.1 | + | 171580    | 171628    |
| Sma-1-18845 | NS_000200.1    | + | 310741364 | 310741412 |
| Sma-1-18846 | NW_003037793.1 | + | 4106378   | 4106426   |
| Sma-1-18847 | NS_000200.1    | + | 4106378   | 4106426   |
| Sma-1-18848 | NW_003038216.1 | - | 89765     | 89717     |
| Sma-1-18849 | NS_000200.1    | - | 306875397 | 306875349 |
| Sma-1-18850 | NW_003026611.1 | - | 95630     | 95582     |
| Sma-1-18851 | NS_000200.1    | - | 310665414 | 310665366 |
| Sma-1-18852 | NW_003038068.1 | - | 246817    | 246769    |
| Sma-1-18853 | NS_000200.1    | - | 263314025 | 263313977 |
| Sma-1-18854 | NW_003037907.1 | - | 793678    | 793630    |
| Sma-1-18855 | NS_000200.1    | - | 152198167 | 152198119 |
| Sma-1-18856 | NW_003038018.1 | - | 910090    | 910042    |
| Sma-1-18857 | NS_000200.1    | - | 233310940 | 233310892 |
| Sma-1-18858 | NW_003038019.1 | + | 106800    | 106848    |
| Sma-1-18859 | NS_000200.1    | + | 233423618 | 233423666 |
| Sma-1-18860 | NW_003037793.1 | + | 3042547   | 3042595   |
| Sma-1-18861 | NS_000200.1    | + | 3042547   | 3042595   |
| Sma-1-18862 | NW_003026615.1 | + | 185393    | 185441    |
| Sma-1-18863 | NW_003026615.1 | + | 187242    | 187290    |
| Sma-1-18864 | NS_000200.1    | + | 317179834 | 317179882 |
| Sma-1-18865 | NS_000200.1    | + | 317181683 | 317181731 |
| Sma-1-18866 | NW_003026617.1 | + | 290141    | 290189    |
| Sma-1-18867 | NW_003037887.1 | + | 1080014   | 1080062   |
| Sma-1-18868 | NS_000200.1    | + | 131543992 | 131544040 |
| Sma-1-18869 | NS_000200.1    | + | 319861000 | 319861048 |
| Sma-1-18870 | NW_003037810.1 | - | 1427531   | 1427483   |
| Sma-1-18871 | NS_000200.1    | - | 38032053  | 38032005  |
| Sma-1-18872 | NW_003026490.1 | - | 112133    | 112085    |
| Sma-1-18873 | NS_000200.1    | - | 267743849 | 267743801 |
| Sma-1-18874 | NW_003033882.1 | + | 181       | 229       |
| Sma-1-18875 | NS_000200.1    | + | 359384764 | 359384812 |
| Sma-1-18876 | NW_003037931.1 | + | 57181     | 57229     |
| Sma-1-18877 | NS_000200.1    | + | 176889848 | 176889896 |
| Sma-1-18878 | NW_003037931.1 | - | 42575     | 42527     |
| Sma-1-18879 | NS_000200.1    | - | 176875242 | 176875194 |
| Sma-1-18880 | NW_003035880.1 | - | 100905    | 100857    |
| Sma-1-18881 | NS_000200.1    | - | 339341969 | 339341921 |
| Sma-1-18882 | NW_003035880.1 | - | 238230    | 238182    |
| Sma-1-18883 | NS_000200.1    | - | 339479294 | 339479246 |
| Sma-1-18884 | NW_003037797.1 | + | 1494850   | 1494898   |
| Sma-1-18885 | NS_000200.1    | + | 11922710  | 11922758  |
| Sma-1-18886 | NW_003026460.1 | - | 276996    | 276948    |

|             |                |   |           |           |
|-------------|----------------|---|-----------|-----------|
| Sma-1-18887 | NW_003037861.1 | + | 779471    | 779519    |
| Sma-1-18888 | NW_003037896.1 | + | 188769    | 188817    |
| Sma-1-18889 | NW_003038034.1 | + | 306293    | 306341    |
| Sma-1-18890 | NS_000200.1    | + | 105555925 | 105555973 |
| Sma-1-18891 | NS_000200.1    | + | 143109192 | 143109240 |
| Sma-1-18892 | NS_000200.1    | + | 247248049 | 247248097 |
| Sma-1-18893 | NS_000200.1    | - | 170799202 | 170799154 |
| Sma-1-18894 | NW_003029310.1 | + | 1488      | 1536      |
| Sma-1-18895 | NW_003037891.1 | - | 2729485   | 2729437   |
| Sma-1-18896 | NS_000200.1    | + | 357269126 | 357269174 |
| Sma-1-18897 | NS_000200.1    | - | 140610763 | 140610715 |
| Sma-1-18898 | NW_003037909.1 | - | 227223    | 227175    |
| Sma-1-18899 | NS_000200.1    | - | 153768872 | 153768824 |
| Sma-1-18900 | NW_003037935.1 | + | 89550     | 89598     |
| Sma-1-18901 | NS_000200.1    | + | 179506085 | 179506133 |
| Sma-1-18902 | NW_003037822.1 | + | 769677    | 769725    |
| Sma-1-18903 | NS_000200.1    | + | 55077683  | 55077731  |
| Sma-1-18904 | NW_003038019.1 | + | 598263    | 598311    |
| Sma-1-18905 | NS_000200.1    | + | 233915081 | 233915129 |
| Sma-1-18906 | NW_003038109.1 | - | 101164    | 101116    |
| Sma-1-18907 | NS_000200.1    | - | 275783842 | 275783794 |
| Sma-1-18908 | NW_003037822.1 | + | 1037459   | 1037507   |
| Sma-1-18909 | NS_000200.1    | + | 55345465  | 55345513  |
| Sma-1-18910 | NW_003037979.1 | - | 265722    | 265674    |
| Sma-1-18911 | NS_000200.1    | - | 210326742 | 210326694 |
| Sma-1-18912 | NW_003037863.1 | - | 1119510   | 1119462   |
| Sma-1-18913 | NS_000200.1    | - | 107877877 | 107877829 |
| Sma-1-18914 | NW_003038069.1 | - | 186346    | 186298    |
| Sma-1-18915 | NS_000200.1    | - | 264029752 | 264029704 |
| Sma-1-18916 | NW_003037854.1 | + | 867605    | 867653    |
| Sma-1-18917 | NS_000200.1    | + | 97772026  | 97772074  |
| Sma-1-18918 | NW_003037795.1 | - | 1561225   | 1561177   |
| Sma-1-18919 | NS_000200.1    | - | 7952108   | 7952060   |
| Sma-1-18920 | NW_003037851.1 | - | 333976    | 333928    |
| Sma-1-18921 | NS_000200.1    | - | 93737286  | 93737238  |
| Sma-1-18922 | NW_003037824.1 | - | 83920     | 83872     |
| Sma-1-18923 | NS_000200.1    | - | 57014860  | 57014812  |
| Sma-1-18924 | NW_003037909.1 | - | 329902    | 329854    |
| Sma-1-18925 | NS_000200.1    | - | 153871551 | 153871503 |
| Sma-1-18926 | NW_003038010.1 | + | 132173    | 132221    |
| Sma-1-18927 | NS_000200.1    | + | 226950396 | 226950444 |
| Sma-1-18928 | NW_003037891.1 | + | 1548920   | 1548968   |
| Sma-1-18929 | NS_000200.1    | + | 139430198 | 139430246 |
| Sma-1-18930 | NW_003038069.1 | + | 72410     | 72458     |
| Sma-1-18931 | NS_000200.1    | + | 263915816 | 263915864 |
| Sma-1-18932 | NW_003037850.1 | + | 574621    | 574669    |
| Sma-1-18933 | NS_000200.1    | + | 92560651  | 92560699  |
| Sma-1-18934 | NW_003026465.1 | + | 756865    | 756913    |
| Sma-1-18935 | NS_000200.1    | + | 208149459 | 208149507 |
| Sma-1-18936 | NW_003038224.1 | - | 151373    | 151325    |
| Sma-1-18937 | NS_000200.1    | - | 309563101 | 309563053 |
| Sma-1-18938 | NW_003037805.1 | - | 1424194   | 1424146   |



|             |                |   |           |           |
|-------------|----------------|---|-----------|-----------|
| Sma-1-18939 | NS_000200.1    | - | 27982038  | 27981990  |
| Sma-1-18940 | NW_003038070.1 | + | 162497    | 162545    |
| Sma-1-18941 | NS_000200.1    | + | 264499738 | 264499786 |
| Sma-1-18942 | NW_003037825.1 | + | 82321     | 82369     |
| Sma-1-18943 | NS_000200.1    | + | 59212103  | 59212151  |
| Sma-1-18944 | NW_003037982.1 | - | 1307006   | 1306958   |
| Sma-1-18945 | NS_000200.1    | - | 214966201 | 214966153 |
| Sma-1-18946 | NW_003038161.1 | + | 102526    | 102574    |
| Sma-1-18947 | NS_000200.1    | + | 297472377 | 297472425 |
| Sma-1-18948 | NW_003037828.1 | - | 31585     | 31537     |
| Sma-1-18949 | NS_000200.1    | - | 65121070  | 65121022  |
| Sma-1-18950 | NW_003038113.1 | - | 9087      | 9039      |
| Sma-1-18951 | NS_000200.1    | - | 276669949 | 276669901 |
| Sma-1-18952 | NW_003038038.1 | - | 1219873   | 1219825   |
| Sma-1-18953 | NS_000200.1    | - | 253123266 | 253123218 |
| Sma-1-18954 | NW_003029826.1 | + | 7411      | 7459      |
| Sma-1-18955 | NW_003032094.1 | - | 3441      | 3393      |
| Sma-1-18956 | NS_000200.1    | + | 376278288 | 376278336 |
| Sma-1-18957 | NS_000200.1    | - | 377675026 | 377674978 |
| Sma-1-18958 | NW_003026596.1 | - | 19117     | 19069     |
| Sma-1-18959 | NS_000200.1    | - | 305289745 | 305289697 |
| Sma-1-18960 | NW_003038070.1 | - | 457382    | 457334    |
| Sma-1-18961 | NS_000200.1    | - | 264794623 | 264794575 |
| Sma-1-18962 | NW_003038006.1 | + | 293279    | 293327    |
| Sma-1-18963 | NS_000200.1    | + | 225177763 | 225177811 |
| Sma-1-18964 | NW_003037912.1 | - | 1269313   | 1269265   |
| Sma-1-18965 | NS_000200.1    | - | 158080888 | 158080840 |
| Sma-1-18966 | NW_003037812.1 | - | 1000624   | 1000576   |
| Sma-1-18967 | NS_000200.1    | - | 40483363  | 40483315  |
| Sma-1-18968 | NW_003038030.1 | + | 1003515   | 1003563   |
| Sma-1-18969 | NS_000200.1    | + | 244139382 | 244139430 |
| Sma-1-18970 | NW_003037944.1 | + | 418145    | 418193    |
| Sma-1-18971 | NS_000200.1    | + | 188639498 | 188639546 |
| Sma-1-18972 | NW_003038594.1 | - | 2469      | 2421      |
| Sma-1-18973 | NS_000200.1    | - | 344790831 | 344790783 |
| Sma-1-18974 | NW_003037904.1 | + | 71774     | 71822     |
| Sma-1-18975 | NS_000200.1    | + | 148786273 | 148786321 |
| Sma-1-18976 | NW_003037810.1 | + | 993310    | 993358    |
| Sma-1-18977 | NS_000200.1    | + | 37597832  | 37597880  |
| Sma-1-18978 | NW_003026722.1 | - | 10981     | 10933     |
| Sma-1-18979 | NS_000200.1    | - | 325422244 | 325422196 |
| Sma-1-18980 | NW_003037825.1 | - | 719243    | 719195    |
| Sma-1-18981 | NS_000200.1    | - | 59849025  | 59848977  |
| Sma-1-18982 | NW_003027899.1 | + | 828       | 876       |
| Sma-1-18983 | NS_000200.1    | + | 366120968 | 366121016 |
| Sma-1-18984 | NW_003026512.1 | + | 189607    | 189655    |
| Sma-1-18985 | NS_000200.1    | + | 285283647 | 285283695 |
| Sma-1-18986 | NW_003037848.1 | + | 915601    | 915649    |
| Sma-1-18987 | NS_000200.1    | + | 90608672  | 90608720  |
| Sma-1-18988 | NW_003037837.1 | - | 838892    | 838844    |
| Sma-1-18989 | NS_000200.1    | - | 77644750  | 77644702  |
| Sma-1-18990 | NW_003037962.1 | - | 51942     | 51894     |

|             |                |   |           |           |
|-------------|----------------|---|-----------|-----------|
| Sma-1-18991 | NS_000200.1    | - | 196128785 | 196128737 |
| Sma-1-18992 | NW_003037825.1 | + | 293857    | 293905    |
| Sma-1-18993 | NS_000200.1    | + | 59423639  | 59423687  |
| Sma-1-18994 | NW_003037907.1 | + | 1040753   | 1040801   |
| Sma-1-18995 | NS_000200.1    | + | 152445242 | 152445290 |
| Sma-1-18996 | NW_003037797.1 | + | 2038769   | 2038817   |
| Sma-1-18997 | NS_000200.1    | + | 12466629  | 12466677  |
| Sma-1-18998 | NW_003026456.1 | + | 572915    | 572963    |
| Sma-1-18999 | NS_000200.1    | + | 58496051  | 58496099  |
| Sma-1-19000 | NW_003038234.1 | + | 89258     | 89306     |
| Sma-1-19001 | NS_000200.1    | + | 312926027 | 312926075 |
| Sma-1-19002 | NW_003037825.1 | + | 1843872   | 1843920   |
| Sma-1-19003 | NS_000200.1    | + | 60973654  | 60973702  |
| Sma-1-19004 | NW_003038008.1 | - | 559916    | 559868    |
| Sma-1-19005 | NS_000200.1    | - | 226233012 | 226232964 |
| Sma-1-19006 | NW_003037801.1 | + | 704852    | 704900    |
| Sma-1-19007 | NS_000200.1    | + | 21794332  | 21794380  |
| Sma-1-19008 | NW_003037936.1 | - | 631912    | 631864    |
| Sma-1-19009 | NS_000200.1    | - | 181071641 | 181071593 |
| Sma-1-19010 | NW_003037877.1 | + | 963731    | 963779    |
| Sma-1-19011 | NS_000200.1    | + | 122002293 | 122002341 |
| Sma-1-19012 | NW_003037821.1 | + | 248931    | 248979    |
| Sma-1-19013 | NS_000200.1    | + | 53393415  | 53393463  |
| Sma-1-19014 | NW_003037830.1 | + | 1500771   | 1500819   |
| Sma-1-19015 | NS_000200.1    | + | 69391142  | 69391190  |
| Sma-1-19016 | NW_003037887.1 | - | 431577    | 431529    |
| Sma-1-19017 | NS_000200.1    | - | 130895555 | 130895507 |
| Sma-1-19018 | NW_003037794.1 | + | 855574    | 855622    |
| Sma-1-19019 | NS_000200.1    | + | 5035169   | 5035217   |
| Sma-1-19020 | NW_003037859.1 | - | 1043897   | 1043849   |
| Sma-1-19021 | NS_000200.1    | - | 103722738 | 103722690 |
| Sma-1-19022 | NW_003037909.1 | + | 238503    | 238551    |
| Sma-1-19023 | NS_000200.1    | + | 153780152 | 153780200 |
| Sma-1-19024 | NW_003038141.1 | - | 233357    | 233309    |
| Sma-1-19025 | NS_000200.1    | - | 287123336 | 287123288 |
| Sma-1-19026 | NW_003037935.1 | + | 780926    | 780974    |
| Sma-1-19027 | NS_000200.1    | + | 180197461 | 180197509 |
| Sma-1-19028 | NW_003037847.1 | - | 735141    | 735093    |
| Sma-1-19029 | NS_000200.1    | - | 89386871  | 89386823  |
| Sma-1-19030 | NW_003037859.1 | + | 26208     | 26256     |
| Sma-1-19031 | NS_000200.1    | + | 102705049 | 102705097 |
| Sma-1-19032 | NW_003037825.1 | + | 1341482   | 1341530   |
| Sma-1-19033 | NS_000200.1    | + | 60471264  | 60471312  |
| Sma-1-19034 | NW_003038072.1 | + | 325272    | 325320    |
| Sma-1-19035 | NS_000200.1    | + | 265487500 | 265487548 |
| Sma-1-19036 | NW_003037891.1 | - | 383239    | 383191    |
| Sma-1-19037 | NS_000200.1    | - | 138264517 | 138264469 |
| Sma-1-19038 | NW_003037800.1 | + | 641389    | 641437    |
| Sma-1-19039 | NS_000200.1    | + | 19270749  | 19270797  |
| Sma-1-19040 | NW_003038048.1 | - | 178160    | 178112    |
| Sma-1-19041 | NS_000200.1    | - | 255755991 | 255755943 |
| Sma-1-19042 | NW_003032312.1 | - | 1949      | 1901      |

|             |                |   |           |           |
|-------------|----------------|---|-----------|-----------|
| Sma-1-19043 | NS_000200.1    | - | 358762787 | 358762739 |
| Sma-1-19044 | NW_003037809.1 | - | 673892    | 673844    |
| Sma-1-19045 | NS_000200.1    | - | 34338356  | 34338308  |
| Sma-1-19046 | NW_003038255.1 | + | 266745    | 266793    |
| Sma-1-19047 | NS_000200.1    | + | 320655890 | 320655938 |
| Sma-1-19048 | NW_003038476.1 | + | 11049     | 11097     |
| Sma-1-19049 | NS_000200.1    | + | 332399424 | 332399472 |
| Sma-1-19050 | NW_003025089.1 | - | 697       | 649       |
| Sma-1-19051 | NS_000200.1    | - | 361156844 | 361156796 |
| Sma-1-19052 | NW_003038034.1 | - | 530691    | 530643    |
| Sma-1-19053 | NS_000200.1    | - | 247472447 | 247472399 |
| Sma-1-19054 | NW_003038023.1 | - | 68555     | 68507     |
| Sma-1-19055 | NS_000200.1    | - | 237228846 | 237228798 |
| Sma-1-19056 | NW_003037967.1 | - | 538284    | 538235    |
| Sma-1-19057 | NS_000200.1    | - | 199778255 | 199778206 |
| Sma-1-19058 | NW_003037967.1 | + | 51763     | 51812     |
| Sma-1-19059 | NS_000200.1    | + | 199291734 | 199291783 |
| Sma-1-19060 | NW_003037794.1 | + | 1981781   | 1981829   |
| Sma-1-19061 | NS_000200.1    | + | 6161376   | 6161424   |
| Sma-1-19062 | NW_003037824.1 | + | 636245    | 636293    |
| Sma-1-19063 | NS_000200.1    | + | 57567185  | 57567233  |
| Sma-1-19064 | NW_003037825.1 | - | 1189464   | 1189416   |
| Sma-1-19065 | NS_000200.1    | - | 60319246  | 60319198  |
| Sma-1-19066 | NW_003028777.1 | - | 1176      | 1128      |
| Sma-1-19067 | NS_000200.1    | - | 369919421 | 369919373 |
| Sma-1-19068 | NW_003037966.1 | - | 88086     | 88038     |
| Sma-1-19069 | NS_000200.1    | - | 198789949 | 198789901 |
| Sma-1-19070 | NW_003037784.1 | + | 383       | 431       |
| Sma-1-19071 | NS_000200.1    | + | 379829250 | 379829298 |
| Sma-1-19072 | NW_003038258.1 | + | 108424    | 108472    |
| Sma-1-19073 | NS_000200.1    | + | 322646934 | 322646982 |
| Sma-1-19074 | NW_003037859.1 | - | 524841    | 524793    |
| Sma-1-19075 | NS_000200.1    | - | 103203682 | 103203634 |
| Sma-1-19076 | NW_003038240.1 | - | 31397     | 31349     |
| Sma-1-19077 | NS_000200.1    | - | 314170328 | 314170280 |
| Sma-1-19078 | NW_003029025.1 | + | 1354      | 1402      |
| Sma-1-19079 | NW_003032116.1 | + | 1122      | 1170      |
| Sma-1-19080 | NW_003026463.1 | + | 54490     | 54538     |
| Sma-1-19081 | NS_000200.1    | + | 198669860 | 198669908 |
| Sma-1-19082 | NS_000200.1    | + | 375204863 | 375204911 |
| Sma-1-19083 | NS_000200.1    | + | 377801696 | 377801744 |
| Sma-1-19084 | NW_003037797.1 | + | 240300    | 240348    |
| Sma-1-19085 | NS_000200.1    | + | 10668160  | 10668208  |
| Sma-1-19086 | NW_003026470.1 | + | 477108    | 477156    |
| Sma-1-19087 | NS_000200.1    | + | 219601077 | 219601125 |
| Sma-1-19088 | NW_003037974.1 | + | 725116    | 725164    |
| Sma-1-19089 | NS_000200.1    | + | 205400422 | 205400470 |
| Sma-1-19090 | NW_003037829.1 | - | 1678478   | 1678430   |
| Sma-1-19091 | NS_000200.1    | - | 67579016  | 67578968  |
| Sma-1-19092 | NW_003038118.1 | - | 329178    | 329130    |
| Sma-1-19093 | NS_000200.1    | - | 277893305 | 277893257 |
| Sma-1-19094 | NW_003037888.1 | - | 61628     | 61580     |

|             |                |   |           |           |
|-------------|----------------|---|-----------|-----------|
| Sma-1-19095 | NS.000200.1    | - | 132270120 | 132270072 |
| Sma-1-19096 | NW_003037833.1 | + | 115643    | 115691    |
| Sma-1-19097 | NS.000200.1    | + | 72306739  | 72306787  |
| Sma-1-19098 | NW_003037807.1 | + | 808365    | 808413    |
| Sma-1-19099 | NS.000200.1    | + | 31069881  | 31069929  |
| Sma-1-19100 | NW_003037846.1 | - | 42888     | 42840     |
| Sma-1-19101 | NS.000200.1    | - | 87677458  | 87677410  |
| Sma-1-19102 | NW_003037859.1 | + | 796311    | 796359    |
| Sma-1-19103 | NS.000200.1    | + | 103475152 | 103475200 |
| Sma-1-19104 | NW_003026508.1 | - | 155164    | 155116    |
| Sma-1-19105 | NS.000200.1    | - | 281199778 | 281199730 |
| Sma-1-19106 | NW_003037846.1 | + | 349466    | 349514    |
| Sma-1-19107 | NS.000200.1    | + | 87984036  | 87984084  |
| Sma-1-19108 | NW_003037859.1 | + | 799759    | 799807    |
| Sma-1-19109 | NS.000200.1    | + | 103478600 | 103478648 |
| Sma-1-19110 | NW_003038032.1 | + | 669591    | 669639    |
| Sma-1-19111 | NS.000200.1    | + | 245828751 | 245828799 |
| Sma-1-19112 | NW_003029519.1 | + | 394       | 442       |
| Sma-1-19113 | NS.000200.1    | + | 362203205 | 362203253 |
| Sma-1-19114 | NW_003037893.1 | - | 384992    | 384944    |
| Sma-1-19115 | NS.000200.1    | - | 141499302 | 141499254 |
| Sma-1-19116 | NW_003037888.1 | - | 606133    | 606085    |
| Sma-1-19117 | NS.000200.1    | - | 132814625 | 132814577 |
| Sma-1-19118 | NW_003026507.1 | + | 252758    | 252806    |
| Sma-1-19119 | NS.000200.1    | + | 279912909 | 279912957 |
| Sma-1-19120 | NW_003037814.1 | + | 1514215   | 1514263   |
| Sma-1-19121 | NS.000200.1    | + | 44498075  | 44498123  |
| Sma-1-19122 | NW_003037894.1 | - | 310317    | 310269    |
| Sma-1-19123 | NS.000200.1    | - | 142206890 | 142206842 |
| Sma-1-19124 | NW_003037859.1 | - | 963483    | 963435    |
| Sma-1-19125 | NS.000200.1    | - | 103642324 | 103642276 |
| Sma-1-19126 | NW_003037860.1 | - | 257932    | 257884    |
| Sma-1-19127 | NS.000200.1    | - | 104000960 | 104000912 |
| Sma-1-19128 | NW_003037964.1 | + | 312       | 360       |
| Sma-1-19129 | NS.000200.1    | + | 197601834 | 197601882 |
| Sma-1-19130 | NW_003037814.1 | + | 1700182   | 1700230   |
| Sma-1-19131 | NS.000200.1    | + | 44684042  | 44684090  |
| Sma-1-19132 | NW_003037814.1 | + | 1689694   | 1689742   |
| Sma-1-19133 | NS.000200.1    | + | 44673554  | 44673602  |
| Sma-1-19134 | NW_003037861.1 | + | 195571    | 195619    |
| Sma-1-19135 | NS.000200.1    | + | 104972025 | 104972073 |
| Sma-1-19136 | NW_003037996.1 | - | 204101    | 204053    |
| Sma-1-19137 | NS.000200.1    | - | 220448977 | 220448929 |
| Sma-1-19138 | NW_003037890.1 | + | 136386    | 136434    |
| Sma-1-19139 | NS.000200.1    | + | 135819747 | 135819795 |
| Sma-1-19140 | NW_003037909.1 | - | 556087    | 556039    |
| Sma-1-19141 | NS.000200.1    | - | 154097736 | 154097688 |
| Sma-1-19142 | NW_003038254.1 | - | 249336    | 249288    |
| Sma-1-19143 | NS.000200.1    | - | 320284894 | 320284846 |
| Sma-1-19144 | NW_003037905.1 | - | 506118    | 506070    |
| Sma-1-19145 | NS.000200.1    | - | 149775130 | 149775082 |
| Sma-1-19146 | NW_003038056.1 | - | 52550     | 52502     |

|             |                |   |           |           |
|-------------|----------------|---|-----------|-----------|
| Sma-1-19147 | NS.000200.1    | - | 259030201 | 259030153 |
| Sma-1-19148 | NW_003037844.1 | - | 51771     | 51723     |
| Sma-1-19149 | NS.000200.1    | - | 86235217  | 86235169  |
| Sma-1-19150 | NW_003029861.1 | + | 325       | 373       |
| Sma-1-19151 | NS.000200.1    | + | 376513122 | 376513170 |
| Sma-1-19152 | NW_003037900.1 | - | 19382     | 19334     |
| Sma-1-19153 | NS.000200.1    | - | 145148248 | 145148200 |
| Sma-1-19154 | NW_003038030.1 | + | 686635    | 686683    |
| Sma-1-19155 | NS.000200.1    | + | 243822502 | 243822550 |
| Sma-1-19156 | NW_003037894.1 | - | 432213    | 432165    |
| Sma-1-19157 | NS.000200.1    | - | 142328786 | 142328738 |
| Sma-1-19158 | NW_003038027.1 | - | 193722    | 193674    |
| Sma-1-19159 | NS.000200.1    | - | 240564436 | 240564388 |
| Sma-1-19160 | NW_003038027.1 | - | 209163    | 209115    |
| Sma-1-19161 | NS.000200.1    | - | 240579877 | 240579829 |
| Sma-1-19162 | NW_003037977.1 | + | 71235     | 71283     |
| Sma-1-19163 | NS.000200.1    | + | 208357255 | 208357303 |
| Sma-1-19164 | NW_003037793.1 | + | 954765    | 954813    |
| Sma-1-19165 | NS.000200.1    | + | 954765    | 954813    |
| Sma-1-19166 | NW_003037794.1 | - | 851416    | 851368    |
| Sma-1-19167 | NS.000200.1    | - | 5031011   | 5030963   |
| Sma-1-19168 | NW_003037894.1 | + | 462393    | 462441    |
| Sma-1-19169 | NS.000200.1    | + | 142358966 | 142359014 |
| Sma-1-19170 | NW_003038077.1 | - | 186807    | 186759    |
| Sma-1-19171 | NS.000200.1    | - | 266958447 | 266958399 |
| Sma-1-19172 | NW_003037797.1 | - | 3361659   | 3361611   |
| Sma-1-19173 | NS.000200.1    | - | 13789519  | 13789471  |
| Sma-1-19174 | NW_003038536.1 | - | 6829      | 6781      |
| Sma-1-19175 | NS.000200.1    | - | 343326852 | 343326804 |
| Sma-1-19176 | NW_003022054.1 | - | 1373      | 1325      |
| Sma-1-19177 | NS.000200.1    | - | 355537402 | 355537354 |
| Sma-1-19178 | NW_003037825.1 | + | 560035    | 560083    |
| Sma-1-19179 | NS.000200.1    | + | 59689817  | 59689865  |
| Sma-1-19180 | NW_003038518.1 | + | 981441    | 981489    |
| Sma-1-19181 | NS.000200.1    | + | 342618274 | 342618322 |
| Sma-1-19182 | NW_003037962.1 | + | 440590    | 440638    |
| Sma-1-19183 | NS.000200.1    | + | 196517433 | 196517481 |
| Sma-1-19184 | NW_003025159.1 | + | 47        | 95        |
| Sma-1-19185 | NS.000200.1    | + | 361286867 | 361286915 |
| Sma-1-19186 | NW_003038153.1 | - | 189727    | 189679    |
| Sma-1-19187 | NS.000200.1    | - | 293251776 | 293251728 |
| Sma-1-19188 | NW_003038009.1 | - | 129626    | 129578    |
| Sma-1-19189 | NS.000200.1    | - | 226503689 | 226503641 |
| Sma-1-19190 | NW_003030628.1 | - | 1168      | 1120      |
| Sma-1-19191 | NS.000200.1    | - | 366607265 | 366607217 |
| Sma-1-19192 | NW_003037823.1 | + | 996076    | 996124    |
| Sma-1-19193 | NS.000200.1    | + | 56912695  | 56912743  |
| Sma-1-19194 | NW_003026490.1 | - | 74359     | 74311     |
| Sma-1-19195 | NS.000200.1    | - | 267706075 | 267706027 |
| Sma-1-19196 | NW_003037874.1 | - | 603247    | 603199    |
| Sma-1-19197 | NS.000200.1    | - | 120028197 | 120028149 |
| Sma-1-19198 | NW_003037932.1 | + | 637124    | 637172    |

|             |                |   |           |           |
|-------------|----------------|---|-----------|-----------|
| Sma-1-19199 | NS.000200.1    | + | 178170320 | 178170368 |
| Sma-1-19200 | NW_003037918.1 | + | 128924    | 128972    |
| Sma-1-19201 | NS.000200.1    | + | 166695914 | 166695962 |
| Sma-1-19202 | NW_003037795.1 | - | 210294    | 210246    |
| Sma-1-19203 | NS.000200.1    | - | 6601177   | 6601129   |
| Sma-1-19204 | NW_003037841.1 | - | 785994    | 785946    |
| Sma-1-19205 | NS.000200.1    | - | 83397175  | 83397127  |
| Sma-1-19206 | NW_003037896.1 | + | 124692    | 124740    |
| Sma-1-19207 | NS.000200.1    | + | 143045115 | 143045163 |
| Sma-1-19208 | NW_003037823.1 | - | 68820     | 68772     |
| Sma-1-19209 | NS.000200.1    | - | 55985439  | 55985391  |
| Sma-1-19210 | NW_003037861.1 | - | 393838    | 393790    |
| Sma-1-19211 | NS.000200.1    | - | 105170292 | 105170244 |
| Sma-1-19212 | NW_003038053.1 | - | 399586    | 399538    |
| Sma-1-19213 | NS.000200.1    | - | 257759681 | 257759633 |
| Sma-1-19214 | NW_003037823.1 | + | 6111      | 6159      |
| Sma-1-19215 | NS.000200.1    | + | 55922730  | 55922778  |
| Sma-1-19216 | NW_003037909.1 | - | 740071    | 740023    |
| Sma-1-19217 | NS.000200.1    | - | 154281720 | 154281672 |
| Sma-1-19218 | NW_003037829.1 | + | 604493    | 604541    |
| Sma-1-19219 | NS.000200.1    | + | 66505031  | 66505079  |
| Sma-1-19220 | NW_003031119.1 | + | 55        | 103       |
| Sma-1-19221 | NS.000200.1    | + | 325774419 | 325774467 |
| Sma-1-19222 | NW_003038028.1 | + | 503375    | 503423    |
| Sma-1-19223 | NS.000200.1    | + | 241810949 | 241810997 |
| Sma-1-19224 | NW_003031278.1 | + | 302       | 350       |
| Sma-1-19225 | NW_003035818.1 | + | 3458      | 3506      |
| Sma-1-19226 | NS.000200.1    | + | 345658521 | 345658569 |
| Sma-1-19227 | NS.000200.1    | + | 364158885 | 364158933 |
| Sma-1-19228 | NW_003031299.1 | - | 1245      | 1197      |
| Sma-1-19229 | NS.000200.1    | - | 345694692 | 345694644 |
| Sma-1-19230 | NW_003038028.1 | - | 642867    | 642819    |
| Sma-1-19231 | NS.000200.1    | - | 241950441 | 241950393 |
| Sma-1-19232 | NW_003037862.1 | + | 298826    | 298874    |
| Sma-1-19233 | NS.000200.1    | + | 105950487 | 105950535 |
| Sma-1-19234 | NW_003037887.1 | + | 1279182   | 1279230   |
| Sma-1-19235 | NS.000200.1    | + | 131743160 | 131743208 |
| Sma-1-19236 | NW_003037794.1 | + | 1307613   | 1307661   |
| Sma-1-19237 | NS.000200.1    | + | 5487208   | 5487256   |
| Sma-1-19238 | NW_003037831.1 | + | 1220198   | 1220246   |
| Sma-1-19239 | NS.000200.1    | + | 70669500  | 70669548  |
| Sma-1-19240 | NW_003037932.1 | + | 878291    | 878339    |
| Sma-1-19241 | NS.000200.1    | + | 178411487 | 178411535 |
| Sma-1-19242 | NW_003037905.1 | - | 180383    | 180333    |
| Sma-1-19243 | NS.000200.1    | - | 149449395 | 149449345 |
| Sma-1-19244 | NW_003037887.1 | + | 1259381   | 1259429   |
| Sma-1-19245 | NS.000200.1    | + | 131723359 | 131723407 |
| Sma-1-19246 | NW_003037793.1 | - | 2691611   | 2691563   |
| Sma-1-19247 | NS.000200.1    | - | 2691611   | 2691563   |
| Sma-1-19248 | NW_003031789.1 | - | 1140      | 1092      |
| Sma-1-19249 | NS.000200.1    | - | 367015914 | 367015866 |
| Sma-1-19250 | NW_003037911.1 | + | 80760     | 80808     |

|             |                |   |           |           |
|-------------|----------------|---|-----------|-----------|
| Sma-1-19251 | NS_000200.1    | + | 155868113 | 155868161 |
| Sma-1-19252 | NW_003037881.1 | - | 829259    | 829211    |
| Sma-1-19253 | NS_000200.1    | - | 125261050 | 125261002 |
| Sma-1-19254 | NW_003026638.1 | + | 88        | 136       |
| Sma-1-19255 | NS_000200.1    | + | 325044771 | 325044819 |
| Sma-1-19256 | NW_003038148.1 | + | 202227    | 202275    |
| Sma-1-19257 | NS_000200.1    | + | 290276211 | 290276259 |
| Sma-1-19258 | NW_003037805.1 | + | 975779    | 975827    |
| Sma-1-19259 | NS_000200.1    | + | 27533623  | 27533671  |
| Sma-1-19260 | NW_003038148.1 | + | 640       | 688       |
| Sma-1-19261 | NW_003038148.1 | + | 36706     | 36754     |
| Sma-1-19262 | NS_000200.1    | + | 290074624 | 290074672 |
| Sma-1-19263 | NS_000200.1    | + | 290110690 | 290110738 |
| Sma-1-19264 | NW_003037961.1 | - | 340446    | 340398    |
| Sma-1-19265 | NS_000200.1    | - | 195964688 | 195964640 |
| Sma-1-19266 | NW_003037863.1 | - | 1280280   | 1280232   |
| Sma-1-19267 | NS_000200.1    | - | 108038647 | 108038599 |
| Sma-1-19268 | NW_003037863.1 | - | 1306522   | 1306474   |
| Sma-1-19269 | NS_000200.1    | - | 108064889 | 108064841 |
| Sma-1-19270 | NW_003037815.1 | - | 341911    | 341863    |
| Sma-1-19271 | NS_000200.1    | - | 45604902  | 45604854  |
| Sma-1-19272 | NW_003035880.1 | - | 102094    | 102046    |
| Sma-1-19273 | NS_000200.1    | - | 339343158 | 339343110 |
| Sma-1-19274 | NW_003037863.1 | + | 172067    | 172115    |
| Sma-1-19275 | NS_000200.1    | + | 106930434 | 106930482 |
| Sma-1-19276 | NW_003037794.1 | + | 1673655   | 1673703   |
| Sma-1-19277 | NS_000200.1    | + | 5853250   | 5853298   |
| Sma-1-19278 | NW_003038030.1 | + | 402820    | 402868    |
| Sma-1-19279 | NS_000200.1    | + | 243538687 | 243538735 |
| Sma-1-19280 | NW_003037793.1 | + | 3581717   | 3581765   |
| Sma-1-19281 | NS_000200.1    | + | 3581717   | 3581765   |
| Sma-1-19282 | NW_003037806.1 | + | 1033226   | 1033274   |
| Sma-1-19283 | NS_000200.1    | + | 29228440  | 29228488  |
| Sma-1-19284 | NW_003038030.1 | - | 454534    | 454486    |
| Sma-1-19285 | NS_000200.1    | - | 243590401 | 243590353 |
| Sma-1-19286 | NW_003037814.1 | + | 374931    | 374979    |
| Sma-1-19287 | NS_000200.1    | + | 43358791  | 43358839  |
| Sma-1-19288 | NW_003037796.1 | + | 353448    | 353496    |
| Sma-1-19289 | NS_000200.1    | + | 8563092   | 8563140   |
| Sma-1-19290 | NW_003037829.1 | + | 621917    | 621966    |
| Sma-1-19291 | NS_000200.1    | + | 66522455  | 66522504  |
| Sma-1-19292 | NW_003038030.1 | - | 511325    | 511277    |
| Sma-1-19293 | NS_000200.1    | - | 243647192 | 243647144 |
| Sma-1-19294 | NW_003037793.1 | + | 3517517   | 3517565   |
| Sma-1-19295 | NS_000200.1    | + | 3517517   | 3517565   |
| Sma-1-19296 | NW_003038056.1 | + | 114987    | 115035    |
| Sma-1-19297 | NS_000200.1    | + | 259092638 | 259092686 |
| Sma-1-19298 | NW_003024373.1 | + | 1167      | 1215      |
| Sma-1-19299 | NS_000200.1    | + | 365606979 | 365607027 |
| Sma-1-19300 | NW_003038074.1 | - | 113629    | 113581    |
| Sma-1-19301 | NS_000200.1    | - | 266005009 | 266004961 |
| Sma-1-19302 | NW_003030487.1 | - | 2062      | 2014      |

|             |                |   |           |           |
|-------------|----------------|---|-----------|-----------|
| Sma-1-19303 | NS_000200.1    | - | 363032614 | 363032566 |
| Sma-1-19304 | NW_003037912.1 | + | 18753     | 18801     |
| Sma-1-19305 | NS_000200.1    | + | 156830328 | 156830376 |
| Sma-1-19306 | NW_003037862.1 | + | 794355    | 794403    |
| Sma-1-19307 | NS_000200.1    | + | 106446016 | 106446064 |
| Sma-1-19308 | NW_003038030.1 | - | 764707    | 764659    |
| Sma-1-19309 | NS_000200.1    | - | 243900574 | 243900526 |
| Sma-1-19310 | NW_003038030.1 | + | 78246     | 78294     |
| Sma-1-19311 | NS_000200.1    | + | 243214113 | 243214161 |
| Sma-1-19312 | NW_003037822.1 | + | 385632    | 385680    |
| Sma-1-19313 | NS_000200.1    | + | 54693638  | 54693686  |
| Sma-1-19314 | NW_003038031.1 | - | 384010    | 383962    |
| Sma-1-19315 | NS_000200.1    | - | 244661768 | 244661720 |
| Sma-1-19316 | NW_003037870.1 | + | 247795    | 247843    |
| Sma-1-19317 | NS_000200.1    | + | 117121460 | 117121508 |
| Sma-1-19318 | NW_003038031.1 | + | 434433    | 434481    |
| Sma-1-19319 | NS_000200.1    | + | 244712191 | 244712239 |
| Sma-1-19320 | NW_003038031.1 | - | 549764    | 549716    |
| Sma-1-19321 | NS_000200.1    | - | 244827522 | 244827474 |
| Sma-1-19322 | NW_003037864.1 | + | 1748434   | 1748482   |
| Sma-1-19323 | NS_000200.1    | + | 110241008 | 110241056 |
| Sma-1-19324 | NW_003037839.1 | - | 97784     | 97736     |
| Sma-1-19325 | NS_000200.1    | - | 79055934  | 79055886  |
| Sma-1-19326 | NW_003037916.1 | + | 196975    | 197023    |
| Sma-1-19327 | NS_000200.1    | + | 163390386 | 163390434 |
| Sma-1-19328 | NW_003038155.1 | - | 120251    | 120203    |
| Sma-1-19329 | NS_000200.1    | - | 294243369 | 294243321 |
| Sma-1-19330 | NW_003029434.1 | + | 1955      | 2003      |
| Sma-1-19331 | NW_003034123.1 | + | 359       | 407       |
| Sma-1-19332 | NS_000200.1    | + | 362054661 | 362054709 |
| Sma-1-19333 | NS_000200.1    | + | 363864536 | 363864584 |
| Sma-1-19334 | NW_003038254.1 | + | 196849    | 196897    |
| Sma-1-19335 | NS_000200.1    | + | 320232407 | 320232455 |
| Sma-1-19336 | NW_003037956.1 | - | 290266    | 290218    |
| Sma-1-19337 | NS_000200.1    | - | 194346721 | 194346673 |
| Sma-1-19338 | NW_003037822.1 | - | 209404    | 209356    |
| Sma-1-19339 | NS_000200.1    | - | 54517410  | 54517362  |
| Sma-1-19340 | NW_003038008.1 | - | 21918     | 21870     |
| Sma-1-19341 | NS_000200.1    | - | 225695014 | 225694966 |
| Sma-1-19342 | NW_003037864.1 | + | 47365     | 47413     |
| Sma-1-19343 | NS_000200.1    | + | 108539939 | 108539987 |
| Sma-1-19344 | NW_003037864.1 | + | 704296    | 704344    |
| Sma-1-19345 | NS_000200.1    | + | 109196870 | 109196918 |
| Sma-1-19346 | NW_003037865.1 | + | 270702    | 270750    |
| Sma-1-19347 | NS_000200.1    | + | 110692621 | 110692669 |
| Sma-1-19348 | NW_003037805.1 | + | 135067    | 135115    |
| Sma-1-19349 | NS_000200.1    | + | 26692911  | 26692959  |
| Sma-1-19350 | NW_003038256.1 | - | 229309    | 229261    |
| Sma-1-19351 | NS_000200.1    | - | 320963135 | 320963087 |
| Sma-1-19352 | NW_003033786.1 | - | 604       | 556       |
| Sma-1-19353 | NS_000200.1    | - | 358970129 | 358970081 |
| Sma-1-19354 | NW_003037977.1 | + | 866076    | 866124    |



|             |                |   |           |           |
|-------------|----------------|---|-----------|-----------|
| Sma-1-19355 | NS_000200.1    | + | 209152096 | 209152144 |
| Sma-1-19356 | NW_003033800.1 | - | 878       | 830       |
| Sma-1-19357 | NS_000200.1    | - | 359014492 | 359014444 |
| Sma-1-19358 | NW_003026486.1 | - | 72203     | 72155     |
| Sma-1-19359 | NS_000200.1    | - | 259693322 | 259693274 |
| Sma-1-19360 | NW_003038083.1 | + | 609940    | 609988    |
| Sma-1-19361 | NW_003038083.1 | - | 620486    | 620438    |
| Sma-1-19362 | NS_000200.1    | + | 270853277 | 270853325 |
| Sma-1-19363 | NS_000200.1    | - | 270863823 | 270863775 |
| Sma-1-19364 | NW_003037917.1 | + | 691415    | 691463    |
| Sma-1-19365 | NS_000200.1    | + | 165728219 | 165728267 |
| Sma-1-19366 | NW_003034018.1 | + | 727       | 775       |
| Sma-1-19367 | NS_000200.1    | + | 363482302 | 363482350 |
| Sma-1-19368 | NW_003037795.1 | - | 1140716   | 1140668   |
| Sma-1-19369 | NS_000200.1    | - | 7531599   | 7531551   |
| Sma-1-19370 | NW_003037817.1 | + | 622702    | 622750    |
| Sma-1-19371 | NS_000200.1    | + | 48005054  | 48005102  |
| Sma-1-19372 | NW_003037859.1 | + | 494572    | 494620    |
| Sma-1-19373 | NS_000200.1    | + | 103173413 | 103173461 |
| Sma-1-19374 | NW_003037913.1 | - | 376032    | 375984    |
| Sma-1-19375 | NS_000200.1    | - | 158939783 | 158939735 |
| Sma-1-19376 | NW_003037822.1 | + | 1031027   | 1031075   |
| Sma-1-19377 | NW_003038236.1 | + | 52035     | 52083     |
| Sma-1-19378 | NS_000200.1    | + | 55339033  | 55339081  |
| Sma-1-19379 | NS_000200.1    | + | 313297705 | 313297753 |
| Sma-1-19380 | NW_003037813.1 | - | 920736    | 920688    |
| Sma-1-19381 | NS_000200.1    | - | 41907599  | 41907551  |
| Sma-1-19382 | NW_003037809.1 | + | 658466    | 658514    |
| Sma-1-19383 | NS_000200.1    | + | 34322930  | 34322978  |
| Sma-1-19384 | NW_003038122.1 | - | 20742     | 20694     |
| Sma-1-19385 | NS_000200.1    | - | 278539969 | 278539921 |
| Sma-1-19386 | NW_003038152.1 | - | 150908    | 150860    |
| Sma-1-19387 | NS_000200.1    | - | 292756632 | 292756584 |
| Sma-1-19388 | NW_003038152.1 | - | 240839    | 240791    |
| Sma-1-19389 | NS_000200.1    | - | 292846563 | 292846515 |
| Sma-1-19390 | NW_003037821.1 | + | 256253    | 256301    |
| Sma-1-19391 | NS_000200.1    | + | 53400737  | 53400785  |
| Sma-1-19392 | NW_003037811.1 | + | 611293    | 611341    |
| Sma-1-19393 | NW_003037813.1 | - | 1038722   | 1038674   |
| Sma-1-19394 | NS_000200.1    | + | 38781535  | 38781583  |
| Sma-1-19395 | NS_000200.1    | - | 42025585  | 42025537  |
| Sma-1-19396 | NW_003038258.1 | + | 285225    | 285273    |
| Sma-1-19397 | NS_000200.1    | + | 322823735 | 322823783 |
| Sma-1-19398 | NW_003038259.1 | - | 123770    | 123722    |
| Sma-1-19399 | NS_000200.1    | - | 322984369 | 322984321 |
| Sma-1-19400 | NW_003037977.1 | + | 909275    | 909323    |
| Sma-1-19401 | NS_000200.1    | + | 209195295 | 209195343 |
| Sma-1-19402 | NW_003037866.1 | + | 1395812   | 1395860   |
| Sma-1-19403 | NS_000200.1    | + | 112883611 | 112883659 |
| Sma-1-19404 | NW_003037911.1 | - | 507772    | 507724    |
| Sma-1-19405 | NS_000200.1    | - | 156295125 | 156295077 |
| Sma-1-19406 | NW_003037798.1 | - | 1562311   | 1562263   |

|             |                |   |           |           |
|-------------|----------------|---|-----------|-----------|
| Sma-1-19407 | NS_000200.1    | - | 15821469  | 15821421  |
| Sma-1-19408 | NW_003038018.1 | - | 593299    | 593251    |
| Sma-1-19409 | NS_000200.1    | - | 232994149 | 232994101 |
| Sma-1-19410 | NW_003035432.1 | - | 155       | 107       |
| Sma-1-19411 | NW_003037793.1 | + | 459544    | 459592    |
| Sma-1-19412 | NS_000200.1    | + | 459544    | 459592    |
| Sma-1-19413 | NS_000200.1    | - | 367455961 | 367455913 |
| Sma-1-19414 | NW_003037946.1 | - | 1180602   | 1180554   |
| Sma-1-19415 | NS_000200.1    | - | 191874462 | 191874414 |
| Sma-1-19416 | NW_003037867.1 | + | 111277    | 111325    |
| Sma-1-19417 | NS_000200.1    | + | 115712096 | 115712144 |
| Sma-1-19418 | NW_003037820.1 | - | 532353    | 532305    |
| Sma-1-19419 | NS_000200.1    | - | 52805335  | 52805287  |
| Sma-1-19420 | NW_003038001.1 | - | 220843    | 220795    |
| Sma-1-19421 | NS_000200.1    | - | 222930404 | 222930356 |
| Sma-1-19422 | NW_003037820.1 | + | 488037    | 488085    |
| Sma-1-19423 | NS_000200.1    | + | 52761019  | 52761067  |
| Sma-1-19424 | NW_003037797.1 | - | 3726009   | 3725961   |
| Sma-1-19425 | NS_000200.1    | - | 14153869  | 14153821  |
| Sma-1-19426 | NW_003037820.1 | - | 480669    | 480621    |
| Sma-1-19427 | NS_000200.1    | - | 52753651  | 52753603  |
| Sma-1-19428 | NW_003038053.1 | + | 61204     | 61252     |
| Sma-1-19429 | NS_000200.1    | + | 257421299 | 257421347 |
| Sma-1-19430 | NW_003037935.1 | - | 200090    | 200042    |
| Sma-1-19431 | NS_000200.1    | - | 179616625 | 179616577 |
| Sma-1-19432 | NW_003037840.1 | - | 277883    | 277835    |
| Sma-1-19433 | NS_000200.1    | - | 80901207  | 80901159  |
| Sma-1-19434 | NW_003035622.1 | - | 4390      | 4341      |
| Sma-1-19435 | NS_000200.1    | - | 329425997 | 329425948 |
| Sma-1-19436 | NW_003035637.1 | - | 16241     | 16193     |
| Sma-1-19437 | NS_000200.1    | - | 329817483 | 329817435 |
| Sma-1-19438 | NW_003037898.1 | + | 225033    | 225081    |
| Sma-1-19439 | NS_000200.1    | + | 144208855 | 144208903 |
| Sma-1-19440 | NW_003037868.1 | - | 268782    | 268734    |
| Sma-1-19441 | NS_000200.1    | - | 116240494 | 116240446 |
| Sma-1-19442 | NW_003038006.1 | + | 249251    | 249299    |
| Sma-1-19443 | NS_000200.1    | + | 225133735 | 225133783 |
| Sma-1-19444 | NW_003037944.1 | + | 737568    | 737616    |
| Sma-1-19445 | NS_000200.1    | + | 188958921 | 188958969 |
| Sma-1-19446 | NW_003037840.1 | + | 1015949   | 1015997   |
| Sma-1-19447 | NS_000200.1    | + | 81639273  | 81639321  |
| Sma-1-19448 | NW_003020746.1 | + | 149       | 197       |
| Sma-1-19449 | NS_000200.1    | + | 364369082 | 364369130 |
| Sma-1-19450 | NW_003037935.1 | + | 128170    | 128218    |
| Sma-1-19451 | NS_000200.1    | + | 179544705 | 179544753 |
| Sma-1-19452 | NW_003035688.1 | - | 3285      | 3237      |
| Sma-1-19453 | NS_000200.1    | - | 332905763 | 332905715 |
| Sma-1-19454 | NW_003037898.1 | - | 430215    | 430167    |
| Sma-1-19455 | NS_000200.1    | - | 144414037 | 144413989 |
| Sma-1-19456 | NW_003038003.1 | - | 12948     | 12900     |
| Sma-1-19457 | NS_000200.1    | - | 223512230 | 223512182 |
| Sma-1-19458 | NW_003038085.1 | + | 16108     | 16156     |

|             |                |   |           |           |
|-------------|----------------|---|-----------|-----------|
| Sma-1-19459 | NS.000200.1    | + | 271706201 | 271706249 |
| Sma-1-19460 | NW_003037819.1 | - | 757729    | 757681    |
| Sma-1-19461 | NS.000200.1    | - | 51845994  | 51845946  |
| Sma-1-19462 | NW_003038085.1 | + | 532496    | 532544    |
| Sma-1-19463 | NS.000200.1    | + | 272222589 | 272222637 |
| Sma-1-19464 | NW_003037878.1 | - | 689020    | 688972    |
| Sma-1-19465 | NS.000200.1    | - | 122742498 | 122742450 |
| Sma-1-19466 | NW_003023437.1 | + | 356       | 404       |
| Sma-1-19467 | NS.000200.1    | + | 373379519 | 373379567 |
| Sma-1-19468 | NW_003023408.1 | + | 557       | 605       |
| Sma-1-19469 | NS.000200.1    | + | 373299654 | 373299702 |
| Sma-1-19470 | NW_003026517.1 | + | 290197    | 290245    |
| Sma-1-19471 | NS.000200.1    | + | 299896206 | 299896254 |
| Sma-1-19472 | NW_003037871.1 | + | 347710    | 347758    |
| Sma-1-19473 | NS.000200.1    | + | 117795448 | 117795496 |
| Sma-1-19474 | NW_003021169.1 | - | 1104      | 1056      |
| Sma-1-19475 | NW_003037812.1 | - | 980185    | 980137    |
| Sma-1-19476 | NS.000200.1    | - | 371504702 | 371504654 |
| Sma-1-19477 | NS.000200.1    | - | 40462924  | 40462876  |
| Sma-1-19478 | NW_003026472.1 | - | 364054    | 364006    |
| Sma-1-19479 | NS.000200.1    | - | 236776046 | 236775998 |
| Sma-1-19480 | NW_003021218.1 | - | 1513      | 1465      |
| Sma-1-19481 | NS.000200.1    | - | 371614812 | 371614764 |
| Sma-1-19482 | NW_003038261.1 | + | 681637    | 681685    |
| Sma-1-19483 | NS.000200.1    | + | 324295288 | 324295336 |
| Sma-1-19484 | NW_003038154.1 | + | 161171    | 161219    |
| Sma-1-19485 | NS.000200.1    | + | 293958880 | 293958928 |
| Sma-1-19486 | NW_003021346.1 | + | 100       | 148       |
| Sma-1-19487 | NW_003032238.1 | - | 2514      | 2466      |
| Sma-1-19488 | NW_003035241.1 | + | 454       | 502       |
| Sma-1-19489 | NS.000200.1    | + | 343906794 | 343906842 |
| Sma-1-19490 | NS.000200.1    | + | 370865370 | 370865418 |
| Sma-1-19491 | NS.000200.1    | - | 357975959 | 357975911 |
| Sma-1-19492 | NW_003035877.1 | + | 115437    | 115485    |
| Sma-1-19493 | NS.000200.1    | + | 337095971 | 337096019 |
| Sma-1-19494 | NW_003038261.1 | + | 913339    | 913387    |
| Sma-1-19495 | NW_003038261.1 | + | 921832    | 921880    |
| Sma-1-19496 | NS.000200.1    | + | 324526990 | 324527038 |
| Sma-1-19497 | NS.000200.1    | + | 324535483 | 324535531 |
| Sma-1-19498 | NW_003037899.1 | - | 119176    | 119128    |
| Sma-1-19499 | NS.000200.1    | - | 144638287 | 144638239 |
| Sma-1-19500 | NW_003037839.1 | + | 307828    | 307876    |
| Sma-1-19501 | NS.000200.1    | + | 79265978  | 79266026  |
| Sma-1-19502 | NW_003038261.1 | + | 952732    | 952780    |
| Sma-1-19503 | NS.000200.1    | + | 324566383 | 324566431 |
| Sma-1-19504 | NW_003035881.1 | + | 277728    | 277776    |
| Sma-1-19505 | NS.000200.1    | + | 341341933 | 341341981 |
| Sma-1-19506 | NW_003035878.1 | + | 420327    | 420375    |
| Sma-1-19507 | NS.000200.1    | + | 337630137 | 337630185 |
| Sma-1-19508 | NW_003039056.1 | + | 1359      | 1407      |
| Sma-1-19509 | NS.000200.1    | + | 359424437 | 359424485 |
| Sma-1-19510 | NW_003038035.1 | - | 1061842   | 1061794   |

|             |                |   |           |           |
|-------------|----------------|---|-----------|-----------|
| Sma-1-19511 | NS_000200.1    | - | 248923334 | 248923286 |
| Sma-1-19512 | NW_003037899.1 | + | 451569    | 451617    |
| Sma-1-19513 | NS_000200.1    | + | 144970680 | 144970728 |
| Sma-1-19514 | NW_003037899.1 | + | 464779    | 464827    |
| Sma-1-19515 | NS_000200.1    | + | 144983890 | 144983938 |
| Sma-1-19516 | NW_003035879.1 | - | 120208    | 120160    |
| Sma-1-19517 | NS_000200.1    | - | 338087535 | 338087487 |
| Sma-1-19518 | NW_003038003.1 | - | 4438      | 4390      |
| Sma-1-19519 | NS_000200.1    | - | 223503720 | 223503672 |
| Sma-1-19520 | NW_003035880.1 | + | 206872    | 206920    |
| Sma-1-19521 | NS_000200.1    | + | 339447936 | 339447984 |
| Sma-1-19522 | NW_003038003.1 | + | 325145    | 325193    |
| Sma-1-19523 | NS_000200.1    | + | 223824427 | 223824475 |
| Sma-1-19524 | NW_003037885.1 | + | 1060355   | 1060403   |
| Sma-1-19525 | NS_000200.1    | + | 129158302 | 129158350 |
| Sma-1-19526 | NW_003037938.1 | + | 807658    | 807706    |
| Sma-1-19527 | NS_000200.1    | + | 182844771 | 182844819 |
| Sma-1-19528 | NW_003022184.1 | + | 918       | 966       |
| Sma-1-19529 | NS_000200.1    | + | 360888777 | 360888825 |
| Sma-1-19530 | NW_003037813.1 | - | 1398625   | 1398577   |
| Sma-1-19531 | NW_003037909.1 | + | 467363    | 467411    |
| Sma-1-19532 | NS_000200.1    | + | 154009012 | 154009060 |
| Sma-1-19533 | NS_000200.1    | - | 42385488  | 42385440  |
| Sma-1-19534 | NW_003037830.1 | + | 614050    | 614098    |
| Sma-1-19535 | NS_000200.1    | + | 68504421  | 68504469  |
| Sma-1-19536 | NW_003038036.1 | + | 12466     | 12514     |
| Sma-1-19537 | NS_000200.1    | + | 248946318 | 248946366 |
| Sma-1-19538 | NW_003037912.1 | - | 47941     | 47893     |
| Sma-1-19539 | NS_000200.1    | - | 156859516 | 156859468 |
| Sma-1-19540 | NW_003022274.1 | + | 1024      | 1072      |
| Sma-1-19541 | NS_000200.1    | + | 361074710 | 361074758 |
| Sma-1-19542 | NW_003022372.1 | - | 313       | 265       |
| Sma-1-19543 | NS_000200.1    | - | 364823002 | 364822954 |
| Sma-1-19544 | NW_003035880.1 | + | 63845     | 63894     |
| Sma-1-19545 | NS_000200.1    | + | 339304909 | 339304958 |
| Sma-1-19546 | NW_003038124.1 | - | 210298    | 210250    |
| Sma-1-19547 | NS_000200.1    | - | 279202942 | 279202894 |
| Sma-1-19548 | NW_003022490.1 | - | 6707      | 6659      |
| Sma-1-19549 | NW_003037853.1 | - | 531816    | 531768    |
| Sma-1-19550 | NS_000200.1    | - | 365039988 | 365039940 |
| Sma-1-19551 | NS_000200.1    | - | 96023867  | 96023819  |
| Sma-1-19552 | NW_003037931.1 | - | 343455    | 343407    |
| Sma-1-19553 | NS_000200.1    | - | 177176122 | 177176074 |
| Sma-1-19554 | NW_003022550.1 | - | 413       | 365       |
| Sma-1-19555 | NS_000200.1    | - | 365162232 | 365162184 |
| Sma-1-19556 | NW_003038036.1 | - | 864954    | 864906    |
| Sma-1-19557 | NS_000200.1    | - | 249798806 | 249798758 |
| Sma-1-19558 | NW_003025819.1 | - | 102       | 54        |
| Sma-1-19559 | NS_000200.1    | - | 356584585 | 356584537 |
| Sma-1-19560 | NW_003037797.1 | - | 503406    | 503358    |
| Sma-1-19561 | NS_000200.1    | - | 10931266  | 10931218  |
| Sma-1-19562 | NW_003038037.1 | - | 1008722   | 1008674   |

|             |                |   |           |           |
|-------------|----------------|---|-----------|-----------|
| Sma-1-19563 | NS_000200.1    | - | 251164131 | 251164083 |
| Sma-1-19564 | NW_003022663.1 | + | 1127      | 1175      |
| Sma-1-19565 | NW_003037936.1 | - | 250004    | 249956    |
| Sma-1-19566 | NS_000200.1    | + | 365377731 | 365377779 |
| Sma-1-19567 | NS_000200.1    | - | 180689733 | 180689685 |
| Sma-1-19568 | NW_003037797.1 | + | 663853    | 663901    |
| Sma-1-19569 | NS_000200.1    | + | 11091713  | 11091761  |
| Sma-1-19570 | NW_003037905.1 | + | 663771    | 663819    |
| Sma-1-19571 | NS_000200.1    | + | 149932783 | 149932831 |
| Sma-1-19572 | NW_003038421.1 | - | 12348     | 12300     |
| Sma-1-19573 | NS_000200.1    | - | 329059892 | 329059844 |
| Sma-1-19574 | NW_003038155.1 | + | 467174    | 467222    |
| Sma-1-19575 | NS_000200.1    | + | 294590292 | 294590340 |
| Sma-1-19576 | NW_003038055.1 | - | 162158    | 162110    |
| Sma-1-19577 | NS_000200.1    | - | 258861480 | 258861432 |
| Sma-1-19578 | NW_003038037.1 | + | 1242125   | 1242173   |
| Sma-1-19579 | NS_000200.1    | + | 251397534 | 251397582 |
| Sma-1-19580 | NW_003037813.1 | - | 629518    | 629470    |
| Sma-1-19581 | NS_000200.1    | - | 41616381  | 41616333  |
| Sma-1-19582 | NW_003022936.1 | - | 749       | 701       |
| Sma-1-19583 | NS_000200.1    | - | 371912400 | 371912352 |
| Sma-1-19584 | NW_003037819.1 | - | 1003906   | 1003858   |
| Sma-1-19585 | NS_000200.1    | - | 52092171  | 52092123  |
| Sma-1-19586 | NW_003039130.1 | + | 213474    | 213522    |
| Sma-1-19587 | NS_000200.1    | + | 317888085 | 317888133 |
| Sma-1-19588 | NW_003037943.1 | + | 365777    | 365825    |
| Sma-1-19589 | NS_000200.1    | + | 187387310 | 187387358 |
| Sma-1-19590 | NW_003038000.1 | + | 59035     | 59083     |
| Sma-1-19591 | NS_000200.1    | + | 222529813 | 222529861 |
| Sma-1-19592 | NW_003037884.1 | + | 854409    | 854457    |
| Sma-1-19593 | NS_000200.1    | + | 127634074 | 127634122 |
| Sma-1-19594 | NW_003037916.1 | + | 378325    | 378373    |
| Sma-1-19595 | NS_000200.1    | + | 163571736 | 163571784 |
| Sma-1-19596 | NW_003037801.1 | + | 704519    | 704567    |
| Sma-1-19597 | NS_000200.1    | + | 21793999  | 21794047  |
| Sma-1-19598 | NW_003038075.1 | + | 44073     | 44121     |
| Sma-1-19599 | NS_000200.1    | + | 266162284 | 266162332 |
| Sma-1-19600 | NW_003038131.1 | - | 51930     | 51882     |
| Sma-1-19601 | NS_000200.1    | - | 282013774 | 282013726 |
| Sma-1-19602 | NW_003037912.1 | - | 491304    | 491256    |
| Sma-1-19603 | NS_000200.1    | - | 157302879 | 157302831 |
| Sma-1-19604 | NW_003037809.1 | - | 509598    | 509550    |
| Sma-1-19605 | NS_000200.1    | - | 34174062  | 34174014  |
| Sma-1-19606 | NW_003037908.1 | - | 223983    | 223935    |
| Sma-1-19607 | NS_000200.1    | - | 152697114 | 152697066 |
| Sma-1-19608 | NW_003036284.1 | + | 449       | 497       |
| Sma-1-19609 | NS_000200.1    | + | 359562230 | 359562278 |
| Sma-1-19610 | NW_003038086.1 | - | 96598     | 96550     |
| Sma-1-19611 | NS_000200.1    | - | 272345191 | 272345143 |
| Sma-1-19612 | NW_003036309.1 | + | 1328      | 1376      |
| Sma-1-19613 | NS_000200.1    | + | 359606339 | 359606387 |
| Sma-1-19614 | NW_003037915.1 | + | 1050721   | 1050769   |

|             |                |   |           |           |
|-------------|----------------|---|-----------|-----------|
| Sma-1-19615 | NW_003037915.1 | + | 1058868   | 1058916   |
| Sma-1-19616 | NS_000200.1    | + | 162950707 | 162950755 |
| Sma-1-19617 | NS_000200.1    | + | 162958854 | 162958902 |
| Sma-1-19618 | NW_003038087.1 | + | 295937    | 295985    |
| Sma-1-19619 | NS_000200.1    | + | 273324338 | 273324386 |
| Sma-1-19620 | NW_003037818.1 | + | 835564    | 835612    |
| Sma-1-19621 | NS_000200.1    | + | 49550971  | 49551019  |
| Sma-1-19622 | NW_003038464.1 | + | 29874     | 29922     |
| Sma-1-19623 | NS_000200.1    | + | 331535141 | 331535189 |
| Sma-1-19624 | NW_003039130.1 | - | 82803     | 82755     |
| Sma-1-19625 | NS_000200.1    | - | 317757414 | 317757366 |
| Sma-1-19626 | NW_003037942.1 | - | 1170975   | 1170927   |
| Sma-1-19627 | NS_000200.1    | - | 186930883 | 186930835 |
| Sma-1-19628 | NW_003037836.1 | - | 93487     | 93439     |
| Sma-1-19629 | NS_000200.1    | - | 75650586  | 75650538  |
| Sma-1-19630 | NW_003037876.1 | + | 459735    | 459783    |
| Sma-1-19631 | NS_000200.1    | + | 121005371 | 121005419 |
| Sma-1-19632 | NW_003037836.1 | - | 529023    | 528973    |
| Sma-1-19633 | NS_000200.1    | - | 76086122  | 76086072  |
| Sma-1-19634 | NW_003038118.1 | - | 267947    | 267899    |
| Sma-1-19635 | NS_000200.1    | - | 277832074 | 277832026 |
| Sma-1-19636 | NW_003038498.1 | - | 62306     | 62258     |
| Sma-1-19637 | NS_000200.1    | - | 334482518 | 334482470 |
| Sma-1-19638 | NW_003037865.1 | - | 82369     | 82321     |
| Sma-1-19639 | NS_000200.1    | - | 110504288 | 110504240 |
| Sma-1-19640 | NW_003037884.1 | - | 1062083   | 1062035   |
| Sma-1-19641 | NS_000200.1    | - | 127841748 | 127841700 |
| Sma-1-19642 | NW_003037037.1 | + | 442       | 490       |
| Sma-1-19643 | NS_000200.1    | + | 343709638 | 343709686 |
| Sma-1-19644 | NW_003037809.1 | + | 50509     | 50557     |
| Sma-1-19645 | NS_000200.1    | + | 33714973  | 33715021  |
| Sma-1-19646 | NW_003037877.1 | + | 80961     | 81009     |
| Sma-1-19647 | NS_000200.1    | + | 121119523 | 121119571 |
| Sma-1-19648 | NW_003037918.1 | - | 863771    | 863723    |
| Sma-1-19649 | NS_000200.1    | - | 167430761 | 167430713 |
| Sma-1-19650 | NW_003038079.1 | - | 316935    | 316887    |
| Sma-1-19651 | NS_000200.1    | - | 268446923 | 268446875 |
| Sma-1-19652 | NW_003037878.1 | - | 213387    | 213339    |
| Sma-1-19653 | NS_000200.1    | - | 122266865 | 122266817 |
| Sma-1-19654 | NW_003037916.1 | - | 1398405   | 1398357   |
| Sma-1-19655 | NS_000200.1    | - | 164591816 | 164591768 |
| Sma-1-19656 | NW_003038016.1 | + | 529404    | 529452    |
| Sma-1-19657 | NS_000200.1    | + | 231645941 | 231645989 |
| Sma-1-19658 | NW_003038013.1 | - | 114210    | 114162    |
| Sma-1-19659 | NS_000200.1    | - | 229503836 | 229503788 |
| Sma-1-19660 | NW_003037941.1 | - | 673146    | 673098    |
| Sma-1-19661 | NS_000200.1    | - | 185407620 | 185407572 |
| Sma-1-19662 | NW_003025056.1 | - | 1507      | 1459      |
| Sma-1-19663 | NS_000200.1    | - | 355977907 | 355977859 |
| Sma-1-19664 | NW_003037831.1 | + | 1113771   | 1113819   |
| Sma-1-19665 | NS_000200.1    | + | 70563073  | 70563121  |
| Sma-1-19666 | NW_003038107.1 | - | 27390     | 27342     |

|             |                |   |           |           |
|-------------|----------------|---|-----------|-----------|
| Sma-1-19667 | NS.000200.1    | - | 275330477 | 275330429 |
| Sma-1-19668 | NW_003037940.1 | + | 912723    | 912771    |
| Sma-1-19669 | NS.000200.1    | + | 184654853 | 184654901 |
| Sma-1-19670 | NW_003038109.1 | - | 103380    | 103332    |
| Sma-1-19671 | NS.000200.1    | - | 275786058 | 275786010 |
| Sma-1-19672 | NW_003038502.1 | - | 176147    | 176099    |
| Sma-1-19673 | NS.000200.1    | - | 335175192 | 335175144 |
| Sma-1-19674 | NW_003026466.1 | + | 1269      | 1317      |
| Sma-1-19675 | NS.000200.1    | + | 215268376 | 215268424 |
| Sma-1-19676 | NW_003026466.1 | + | 119628    | 119676    |
| Sma-1-19677 | NS.000200.1    | + | 215386735 | 215386783 |
| Sma-1-19678 | NW_003037801.1 | - | 812848    | 812800    |
| Sma-1-19679 | NS.000200.1    | - | 21902328  | 21902280  |
| Sma-1-19680 | NW_003037795.1 | - | 164886    | 164838    |
| Sma-1-19681 | NS.000200.1    | - | 6555769   | 6555721   |
| Sma-1-19682 | NW_003026465.1 | - | 74923     | 74875     |
| Sma-1-19683 | NS.000200.1    | - | 207467517 | 207467469 |
| Sma-1-19684 | NW_003037818.1 | + | 1532092   | 1532140   |
| Sma-1-19685 | NS.000200.1    | + | 50247499  | 50247547  |
| Sma-1-19686 | NW_003038502.1 | - | 181943    | 181895    |
| Sma-1-19687 | NS.000200.1    | - | 335180988 | 335180940 |
| Sma-1-19688 | NW_003037798.1 | - | 1259595   | 1259547   |
| Sma-1-19689 | NS.000200.1    | - | 15518753  | 15518705  |
| Sma-1-19690 | NW_003037913.1 | - | 629357    | 629309    |
| Sma-1-19691 | NS.000200.1    | - | 159193108 | 159193060 |
| Sma-1-19692 | NW_003037835.1 | + | 963470    | 963518    |
| Sma-1-19693 | NS.000200.1    | + | 75359978  | 75360026  |
| Sma-1-19694 | NW_003037835.1 | - | 910173    | 910125    |
| Sma-1-19695 | NS.000200.1    | - | 75306681  | 75306633  |
| Sma-1-19696 | NW_003025858.1 | + | 955       | 1003      |
| Sma-1-19697 | NW_003037824.1 | - | 345096    | 345048    |
| Sma-1-19698 | NS.000200.1    | + | 356644806 | 356644854 |
| Sma-1-19699 | NS.000200.1    | - | 57276036  | 57275988  |
| Sma-1-19700 | NS.000200.1    | - | 369420051 | 369420003 |
| Sma-1-19701 | NW_003037785.1 | + | 149994    | 150042    |
| Sma-1-19702 | NS.000200.1    | + | 380048661 | 380048709 |
| Sma-1-19703 | NW_003037817.1 | + | 770975    | 771023    |
| Sma-1-19704 | NS.000200.1    | + | 48153327  | 48153375  |
| Sma-1-19705 | NW_003037901.1 | - | 798321    | 798273    |
| Sma-1-19706 | NS.000200.1    | - | 146646782 | 146646734 |
| Sma-1-19707 | NW_003037835.1 | - | 1020632   | 1020584   |
| Sma-1-19708 | NW_003038145.1 | + | 69486     | 69534     |
| Sma-1-19709 | NS.000200.1    | + | 288680909 | 288680957 |
| Sma-1-19710 | NS.000200.1    | - | 75417140  | 75417092  |
| Sma-1-19711 | NW_003037918.1 | + | 226537    | 226585    |
| Sma-1-19712 | NS.000200.1    | + | 166793527 | 166793575 |
| Sma-1-19713 | NW_003037806.1 | + | 1390035   | 1390083   |
| Sma-1-19714 | NS.000200.1    | + | 29585249  | 29585297  |
| Sma-1-19715 | NW_003038039.1 | - | 5346      | 5298      |
| Sma-1-19716 | NS.000200.1    | - | 253443192 | 253443144 |
| Sma-1-19717 | NW_003037809.1 | + | 2418859   | 2418907   |
| Sma-1-19718 | NS.000200.1    | + | 36083323  | 36083371  |

|             |                |   |           |           |
|-------------|----------------|---|-----------|-----------|
| Sma-1-19719 | NW_003037925.1 | + | 530721    | 530769    |
| Sma-1-19720 | NS_000200.1    | + | 172932724 | 172932772 |
| Sma-1-19721 | NW_003037980.1 | + | 690593    | 690641    |
| Sma-1-19722 | NS_000200.1    | + | 211651455 | 211651503 |
| Sma-1-19723 | NW_003037916.1 | + | 1664438   | 1664486   |
| Sma-1-19724 | NS_000200.1    | + | 164857849 | 164857897 |
| Sma-1-19725 | NW_003037788.1 | + | 206358    | 206406    |
| Sma-1-19726 | NS_000200.1    | + | 380653596 | 380653644 |
| Sma-1-19727 | NW_003037928.1 | + | 390029    | 390077    |
| Sma-1-19728 | NS_000200.1    | + | 174713982 | 174714030 |
| Sma-1-19729 | NW_003037928.1 | + | 910321    | 910369    |
| Sma-1-19730 | NS_000200.1    | + | 175234274 | 175234322 |
| Sma-1-19731 | NW_003037916.1 | + | 655203    | 655251    |
| Sma-1-19732 | NS_000200.1    | + | 163848614 | 163848662 |
| Sma-1-19733 | NW_003037940.1 | + | 132450    | 132498    |
| Sma-1-19734 | NS_000200.1    | + | 183874580 | 183874628 |
| Sma-1-19735 | NW_003037986.1 | + | 29300     | 29348     |
| Sma-1-19736 | NS_000200.1    | + | 215446052 | 215446100 |
| Sma-1-19737 | NW_003037904.1 | - | 393570    | 393522    |
| Sma-1-19738 | NS_000200.1    | - | 149108069 | 149108021 |
| Sma-1-19739 | NW_003037817.1 | - | 195688    | 195640    |
| Sma-1-19740 | NS_000200.1    | - | 47578040  | 47577992  |
| Sma-1-19741 | NW_003037791.1 | + | 239564    | 239612    |
| Sma-1-19742 | NS_000200.1    | + | 381944992 | 381945040 |
| Sma-1-19743 | NW_003037798.1 | + | 2538054   | 2538102   |
| Sma-1-19744 | NS_000200.1    | + | 16797212  | 16797260  |
| Sma-1-19745 | NW_003026465.1 | - | 113920    | 113872    |
| Sma-1-19746 | NS_000200.1    | - | 207506514 | 207506466 |
| Sma-1-19747 | NW_003037939.1 | - | 771382    | 771334    |
| Sma-1-19748 | NS_000200.1    | - | 183641136 | 183641088 |
| Sma-1-19749 | NW_003037924.1 | + | 176114    | 176162    |
| Sma-1-19750 | NS_000200.1    | + | 171883072 | 171883120 |
| Sma-1-19751 | NW_003037981.1 | - | 132216    | 132168    |
| Sma-1-19752 | NS_000200.1    | - | 212530084 | 212530036 |
| Sma-1-19753 | NW_003037834.1 | + | 153618    | 153666    |
| Sma-1-19754 | NS_000200.1    | + | 73314104  | 73314152  |
| Sma-1-19755 | NW_003037809.1 | + | 1501649   | 1501697   |
| Sma-1-19756 | NS_000200.1    | + | 35166113  | 35166161  |
| Sma-1-19757 | NW_003037800.1 | + | 293841    | 293889    |
| Sma-1-19758 | NS_000200.1    | + | 18923201  | 18923249  |
| Sma-1-19759 | NW_003026458.1 | + | 460346    | 460394    |
| Sma-1-19760 | NS_000200.1    | + | 102328576 | 102328624 |
| Sma-1-19761 | NW_003037981.1 | - | 133271    | 133223    |
| Sma-1-19762 | NS_000200.1    | - | 212531139 | 212531091 |
| Sma-1-19763 | NW_003037917.1 | - | 356140    | 356092    |
| Sma-1-19764 | NS_000200.1    | - | 165392944 | 165392896 |
| Sma-1-19765 | NW_003037809.1 | + | 1401547   | 1401595   |
| Sma-1-19766 | NS_000200.1    | + | 35066011  | 35066059  |
| Sma-1-19767 | NW_003037798.1 | + | 1686046   | 1686094   |
| Sma-1-19768 | NS_000200.1    | + | 15945204  | 15945252  |
| Sma-1-19769 | NW_003037800.1 | + | 624477    | 624525    |
| Sma-1-19770 | NS_000200.1    | + | 19253837  | 19253885  |



|             |                |   |           |           |
|-------------|----------------|---|-----------|-----------|
| Sma-1-19771 | NW_003037982.1 | - | 1356898   | 1356850   |
| Sma-1-19772 | NS_000200.1    | - | 215016093 | 215016045 |
| Sma-1-19773 | NW_003037800.1 | - | 918973    | 918925    |
| Sma-1-19774 | NS_000200.1    | - | 19548333  | 19548285  |
| Sma-1-19775 | NW_003037801.1 | + | 511406    | 511454    |
| Sma-1-19776 | NS_000200.1    | + | 21600886  | 21600934  |
| Sma-1-19777 | NW_003026459.1 | + | 155403    | 155451    |
| Sma-1-19778 | NS_000200.1    | + | 141800676 | 141800724 |
| Sma-1-19779 | NW_003037903.1 | + | 700175    | 700223    |
| Sma-1-19780 | NS_000200.1    | + | 148254256 | 148254304 |
| Sma-1-19781 | NW_003037808.1 | - | 353366    | 353318    |
| Sma-1-19782 | NS_000200.1    | - | 32140003  | 32139955  |
| Sma-1-19783 | NW_003037921.1 | - | 112800    | 112752    |
| Sma-1-19784 | NS_000200.1    | - | 169642935 | 169642887 |
| Sma-1-19785 | NW_003037793.1 | - | 1367780   | 1367732   |
| Sma-1-19786 | NS_000200.1    | - | 1367780   | 1367732   |
| Sma-1-19787 | NW_003037802.1 | + | 32284     | 32332     |
| Sma-1-19788 | NS_000200.1    | + | 22035078  | 22035126  |
| Sma-1-19789 | NW_003037981.1 | + | 514457    | 514505    |
| Sma-1-19790 | NS_000200.1    | + | 212912325 | 212912373 |
| Sma-1-19791 | NW_003037920.1 | + | 75672     | 75720     |
| Sma-1-19792 | NS_000200.1    | + | 169256479 | 169256527 |
| Sma-1-19793 | NW_003037803.1 | + | 1015763   | 1015811   |
| Sma-1-19794 | NS_000200.1    | + | 24516300  | 24516348  |
| Sma-1-19795 | NW_003026464.1 | + | 107277    | 107325    |
| Sma-1-19796 | NS_000200.1    | + | 203407586 | 203407634 |
| Sma-1-19797 | NW_003037793.1 | + | 2081343   | 2081391   |
| Sma-1-19798 | NS_000200.1    | + | 2081343   | 2081391   |
| Sma-1-19799 | NW_003037803.1 | + | 1319386   | 1319434   |
| Sma-1-19800 | NS_000200.1    | + | 24819923  | 24819971  |
| Sma-1-19801 | NW_003037803.1 | + | 1578512   | 1578560   |
| Sma-1-19802 | NS_000200.1    | + | 25079049  | 25079097  |
| Sma-1-19803 | NW_003037803.1 | + | 1606043   | 1606091   |
| Sma-1-19804 | NS_000200.1    | + | 25106580  | 25106628  |
| Sma-1-19805 | NW_003026609.1 | + | 29449     | 29498     |
| Sma-1-19806 | NS_000200.1    | + | 309684441 | 309684490 |
| Sma-1-19807 | NW_003037856.1 | + | 442674    | 442723    |
| Sma-1-19808 | NS_000200.1    | + | 99800630  | 99800679  |
| Sma-1-19809 | NW_003038027.1 | - | 216609    | 216560    |
| Sma-1-19810 | NS_000200.1    | - | 240587323 | 240587274 |
| Sma-1-19811 | NW_003038044.1 | - | 87210     | 87161     |
| Sma-1-19812 | NS_000200.1    | - | 254711992 | 254711943 |
| Sma-1-19813 | NW_003038037.1 | - | 1283477   | 1283428   |
| Sma-1-19814 | NS_000200.1    | - | 251438886 | 251438837 |
| Sma-1-19815 | NW_003037800.1 | + | 153303    | 153352    |
| Sma-1-19816 | NS_000200.1    | + | 18782663  | 18782712  |
| Sma-1-19817 | NW_003037918.1 | + | 94694     | 94743     |
| Sma-1-19818 | NS_000200.1    | + | 166661684 | 166661733 |
| Sma-1-19819 | NW_003037799.1 | + | 1415871   | 1415920   |
| Sma-1-19820 | NS_000200.1    | + | 18406225  | 18406274  |
| Sma-1-19821 | NW_003037942.1 | + | 183435    | 183488    |
| Sma-1-19822 | NS_000200.1    | + | 185943343 | 185943396 |

|             |                |   |           |           |
|-------------|----------------|---|-----------|-----------|
| Sma-1-19823 | NW_003036688.1 | - | 780       | 729       |
| Sma-1-19824 | NW_003037799.1 | + | 768349    | 768400    |
| Sma-1-19825 | NS_000200.1    | + | 17758703  | 17758754  |
| Sma-1-19826 | NS_000200.1    | - | 351536688 | 351536637 |
| Sma-1-19827 | NW_003037970.1 | + | 367303    | 367354    |
| Sma-1-19828 | NS_000200.1    | + | 201423493 | 201423544 |
| Sma-1-19829 | NW_003026460.1 | - | 398030    | 397977    |
| Sma-1-19830 | NS_000200.1    | - | 170920236 | 170920183 |
| Sma-1-19831 | NW_003037839.1 | + | 40968     | 41019     |
| Sma-1-19832 | NS_000200.1    | + | 78999118  | 78999169  |
| Sma-1-19833 | NW_003038073.1 | + | 11131     | 11182     |
| Sma-1-19834 | NS_000200.1    | + | 265533564 | 265533615 |
| Sma-1-19835 | NW_003037860.1 | - | 70153     | 70102     |
| Sma-1-19836 | NS_000200.1    | - | 103813181 | 103813130 |
| Sma-1-19837 | NW_003037940.1 | - | 72709     | 72658     |
| Sma-1-19838 | NS_000200.1    | - | 183814839 | 183814788 |
| Sma-1-19839 | NW_003038077.1 | + | 298987    | 299038    |
| Sma-1-19840 | NS_000200.1    | + | 267070627 | 267070678 |
| Sma-1-19841 | NW_003038502.1 | + | 101750    | 101801    |
| Sma-1-19842 | NS_000200.1    | + | 335100795 | 335100846 |
| Sma-1-19843 | NW_003037809.1 | + | 2099520   | 2099571   |
| Sma-1-19844 | NS_000200.1    | + | 35763984  | 35764035  |
| Sma-1-19845 | NW_003037915.1 | - | 1154197   | 1154149   |
| Sma-1-19846 | NS_000200.1    | - | 163054183 | 163054135 |
| Sma-1-19847 | NW_003037793.1 | + | 168445    | 168493    |
| Sma-1-19848 | NS_000200.1    | + | 168445    | 168493    |
| Sma-1-19849 | NW_003037824.1 | + | 949376    | 949424    |
| Sma-1-19850 | NS_000200.1    | + | 57880316  | 57880364  |
| Sma-1-19851 | NW_003026617.1 | - | 303518    | 303470    |
| Sma-1-19852 | NS_000200.1    | - | 319874377 | 319874329 |
| Sma-1-19853 | NW_003037837.1 | + | 127085    | 127133    |
| Sma-1-19854 | NS_000200.1    | + | 76932943  | 76932991  |
| Sma-1-19855 | NW_003026458.1 | + | 446717    | 446765    |
| Sma-1-19856 | NW_003037880.1 | + | 720651    | 720699    |
| Sma-1-19857 | NS_000200.1    | + | 102314947 | 102314995 |
| Sma-1-19858 | NS_000200.1    | + | 124404209 | 124404257 |
| Sma-1-19859 | NW_003028525.1 | + | 1312      | 1360      |
| Sma-1-19860 | NS_000200.1    | + | 374562059 | 374562107 |
| Sma-1-19861 | NW_003035881.1 | + | 115688    | 115736    |
| Sma-1-19862 | NS_000200.1    | + | 341179893 | 341179941 |
| Sma-1-19863 | NW_003037976.1 | - | 256278    | 256230    |
| Sma-1-19864 | NS_000200.1    | - | 206870593 | 206870545 |
| Sma-1-19865 | NW_003026489.1 | - | 29719     | 29671     |
| Sma-1-19866 | NS_000200.1    | - | 264254939 | 264254891 |
| Sma-1-19867 | NW_003037831.1 | - | 995259    | 995211    |
| Sma-1-19868 | NS_000200.1    | - | 70444561  | 70444513  |
| Sma-1-19869 | NW_003038157.1 | - | 334298    | 334250    |
| Sma-1-19870 | NS_000200.1    | - | 295585218 | 295585170 |
| Sma-1-19871 | NW_003037796.1 | + | 51843     | 51891     |
| Sma-1-19872 | NS_000200.1    | + | 8261487   | 8261535   |
| Sma-1-19873 | NW_003037896.1 | - | 316029    | 315981    |
| Sma-1-19874 | NS_000200.1    | - | 143236452 | 143236404 |

|             |                |   |           |           |
|-------------|----------------|---|-----------|-----------|
| Sma-1-19875 | NW_003037895.1 | - | 127504    | 127456    |
| Sma-1-19876 | NS_000200.1    | - | 142573706 | 142573658 |
| Sma-1-19877 | NW_003037853.1 | + | 501171    | 501219    |
| Sma-1-19878 | NS_000200.1    | + | 95993222  | 95993270  |
| Sma-1-19879 | NW_003037854.1 | - | 1005559   | 1005511   |
| Sma-1-19880 | NS_000200.1    | - | 97909980  | 97909932  |
| Sma-1-19881 | NW_003038067.1 | + | 109326    | 109374    |
| Sma-1-19882 | NS_000200.1    | + | 262963379 | 262963427 |
| Sma-1-19883 | NW_003038023.1 | + | 252374    | 252422    |
| Sma-1-19884 | NS_000200.1    | + | 237412665 | 237412713 |
| Sma-1-19885 | NW_003038247.1 | + | 60492     | 60540     |
| Sma-1-19886 | NS_000200.1    | + | 316009220 | 316009268 |
| Sma-1-19887 | NW_003038248.1 | + | 70378     | 70426     |
| Sma-1-19888 | NS_000200.1    | + | 316381645 | 316381693 |
| Sma-1-19889 | NW_003038032.1 | + | 662983    | 663031    |
| Sma-1-19890 | NS_000200.1    | + | 245822143 | 245822191 |
| Sma-1-19891 | NW_003037885.1 | - | 378956    | 378908    |
| Sma-1-19892 | NS_000200.1    | - | 128476903 | 128476855 |
| Sma-1-19893 | NW_003038443.1 | + | 11756     | 11804     |
| Sma-1-19894 | NS_000200.1    | + | 330041402 | 330041450 |
| Sma-1-19895 | NW_003037995.1 | + | 84192     | 84239     |
| Sma-1-19896 | NS_000200.1    | + | 219773960 | 219774007 |
| Sma-1-19897 | NW_003037798.1 | - | 2423467   | 2423420   |
| Sma-1-19898 | NW_003038037.1 | + | 1181644   | 1181691   |
| Sma-1-19899 | NS_000200.1    | + | 251337053 | 251337100 |
| Sma-1-19900 | NS_000200.1    | - | 16682625  | 16682578  |
| Sma-1-19901 | NW_003037916.1 | - | 706659    | 706612    |
| Sma-1-19902 | NS_000200.1    | - | 163900070 | 163900023 |
| Sma-1-19903 | NW_003037933.1 | - | 85678     | 85631     |
| Sma-1-19904 | NS_000200.1    | - | 178498850 | 178498803 |
| Sma-1-19905 | NW_003037818.1 | - | 1008291   | 1008244   |
| Sma-1-19906 | NS_000200.1    | - | 49723698  | 49723651  |
| Sma-1-19907 | NW_003036961.1 | - | 1871      | 1823      |
| Sma-1-19908 | NS_000200.1    | - | 343562244 | 343562196 |
| Sma-1-19909 | NW_003037917.1 | - | 812218    | 812170    |
| Sma-1-19910 | NS_000200.1    | - | 165849022 | 165848974 |
| Sma-1-19911 | NW_003037918.1 | + | 2048219   | 2048267   |
| Sma-1-19912 | NS_000200.1    | + | 168615209 | 168615257 |
| Sma-1-19913 | NW_003037804.1 | + | 974576    | 974624    |
| Sma-1-19914 | NW_003037804.1 | + | 992443    | 992491    |
| Sma-1-19915 | NS_000200.1    | + | 26114596  | 26114644  |
| Sma-1-19916 | NS_000200.1    | + | 26132463  | 26132511  |
| Sma-1-19917 | NW_003037917.1 | + | 560056    | 560104    |
| Sma-1-19918 | NS_000200.1    | + | 165596860 | 165596908 |
| Sma-1-19919 | NW_003037804.1 | - | 946765    | 946717    |
| Sma-1-19920 | NW_003037918.1 | + | 1301984   | 1302032   |
| Sma-1-19921 | NS_000200.1    | + | 167868974 | 167869022 |
| Sma-1-19922 | NS_000200.1    | - | 26086785  | 26086737  |
| Sma-1-19923 | NW_003038053.1 | - | 417229    | 417181    |
| Sma-1-19924 | NS_000200.1    | - | 257777324 | 257777276 |
| Sma-1-19925 | NW_003038079.1 | - | 105213    | 105165    |
| Sma-1-19926 | NS_000200.1    | - | 268235201 | 268235153 |

|             |                |   |           |           |
|-------------|----------------|---|-----------|-----------|
| Sma-1-19927 | NW_003037804.1 | + | 530818    | 530866    |
| Sma-1-19928 | NS_000200.1    | + | 25670838  | 25670886  |
| Sma-1-19929 | NW_003037804.1 | - | 527388    | 527340    |
| Sma-1-19930 | NS_000200.1    | - | 25667408  | 25667360  |
| Sma-1-19931 | NW_003037804.1 | - | 1361129   | 1361081   |
| Sma-1-19932 | NS_000200.1    | - | 26501149  | 26501101  |
| Sma-1-19933 | NW_003037804.1 | + | 1113640   | 1113688   |
| Sma-1-19934 | NS_000200.1    | + | 26253660  | 26253708  |
| Sma-1-19935 | NW_003037882.1 | + | 531994    | 532042    |
| Sma-1-19936 | NW_003038035.1 | - | 654667    | 654619    |
| Sma-1-19937 | NS_000200.1    | + | 125823668 | 125823716 |
| Sma-1-19938 | NS_000200.1    | - | 248516159 | 248516111 |
| Sma-1-19939 | NW_003039129.1 | - | 246860    | 246812    |
| Sma-1-19940 | NS_000200.1    | - | 229201668 | 229201620 |
| Sma-1-19941 | NW_003037802.1 | + | 754132    | 754180    |
| Sma-1-19942 | NW_003037824.1 | - | 634254    | 634206    |
| Sma-1-19943 | NW_003037880.1 | - | 432643    | 432595    |
| Sma-1-19944 | NS_000200.1    | + | 22756926  | 22756974  |
| Sma-1-19945 | NS_000200.1    | - | 124116201 | 124116153 |
| Sma-1-19946 | NS_000200.1    | - | 57565194  | 57565146  |
| Sma-1-19947 | NW_003037972.1 | - | 622634    | 622586    |
| Sma-1-19948 | NS_000200.1    | - | 203098338 | 203098290 |
| Sma-1-19949 | NW_003037800.1 | - | 1960116   | 1960068   |
| Sma-1-19950 | NS_000200.1    | - | 20589476  | 20589428  |
| Sma-1-19951 | NW_003037801.1 | + | 677807    | 677855    |
| Sma-1-19952 | NS_000200.1    | + | 21767287  | 21767335  |
| Sma-1-19953 | NW_003026575.1 | - | 62669     | 62621     |
| Sma-1-19954 | NS_000200.1    | - | 302294335 | 302294287 |
| Sma-1-19955 | NW_003037825.1 | - | 1663637   | 1663589   |
| Sma-1-19956 | NS_000200.1    | - | 60793419  | 60793371  |
| Sma-1-19957 | NW_003026618.1 | + | 212366    | 212414    |
| Sma-1-19958 | NS_000200.1    | + | 321967368 | 321967416 |
| Sma-1-19959 | NW_003026516.1 | + | 180265    | 180313    |
| Sma-1-19960 | NS_000200.1    | + | 299288562 | 299288610 |
| Sma-1-19961 | NW_003037890.1 | + | 1801372   | 1801420   |
| Sma-1-19962 | NS_000200.1    | + | 137484733 | 137484781 |
| Sma-1-19963 | NW_003038118.1 | - | 330594    | 330546    |
| Sma-1-19964 | NS_000200.1    | - | 277894721 | 277894673 |
| Sma-1-19965 | NW_003038212.1 | + | 13470     | 13518     |
| Sma-1-19966 | NS_000200.1    | + | 306177361 | 306177409 |
| Sma-1-19967 | NW_003038518.1 | - | 329325    | 329277    |
| Sma-1-19968 | NS_000200.1    | - | 341966158 | 341966110 |
| Sma-1-19969 | NW_003037793.1 | - | 4134685   | 4134637   |
| Sma-1-19970 | NS_000200.1    | - | 4134685   | 4134637   |
| Sma-1-19971 | NW_003035877.1 | + | 34539     | 34587     |
| Sma-1-19972 | NS_000200.1    | + | 337015073 | 337015121 |
| Sma-1-19973 | NW_003026516.1 | - | 215495    | 215447    |
| Sma-1-19974 | NS_000200.1    | - | 299323792 | 299323744 |
| Sma-1-19975 | NW_003026515.1 | + | 98886     | 98934     |
| Sma-1-19976 | NS_000200.1    | + | 290743297 | 290743345 |
| Sma-1-19977 | NW_003037904.1 | - | 466557    | 466509    |
| Sma-1-19978 | NS_000200.1    | - | 149181056 | 149181008 |

|             |                |   |           |           |
|-------------|----------------|---|-----------|-----------|
| Sma-1-19979 | NW_003037908.1 | - | 859042    | 858994    |
| Sma-1-19980 | NW_003037942.1 | + | 227444    | 227492    |
| Sma-1-19981 | NS_000200.1    | + | 185987352 | 185987400 |
| Sma-1-19982 | NS_000200.1    | - | 153332173 | 153332125 |
| Sma-1-19983 | NW_003037831.1 | - | 1695135   | 1695087   |
| Sma-1-19984 | NS_000200.1    | - | 71144437  | 71144389  |
| Sma-1-19985 | NW_003037880.1 | + | 288108    | 288156    |
| Sma-1-19986 | NS_000200.1    | + | 123971666 | 123971714 |
| Sma-1-19987 | NW_003038260.1 | - | 432682    | 432634    |
| Sma-1-19988 | NS_000200.1    | - | 323604457 | 323604409 |
| Sma-1-19989 | NW_003037946.1 | + | 882687    | 882735    |
| Sma-1-19990 | NS_000200.1    | + | 191576547 | 191576595 |
| Sma-1-19991 | NW_003037958.1 | - | 144788    | 144740    |
| Sma-1-19992 | NW_003037978.1 | + | 9772      | 9820      |
| Sma-1-19993 | NS_000200.1    | + | 209277782 | 209277830 |
| Sma-1-19994 | NS_000200.1    | - | 194808972 | 194808924 |
| Sma-1-19995 | NW_003038032.1 | + | 394902    | 394950    |
| Sma-1-19996 | NS_000200.1    | + | 245554062 | 245554110 |
| Sma-1-19997 | NW_003038000.1 | - | 125013    | 124965    |
| Sma-1-19998 | NS_000200.1    | - | 222595791 | 222595743 |
| Sma-1-19999 | NW_003037870.1 | - | 277450    | 277402    |
| Sma-1-20000 | NS_000200.1    | - | 117151115 | 117151067 |
| Sma-1-20001 | NW_003026460.1 | - | 146212    | 146164    |
| Sma-1-20002 | NW_003037986.1 | - | 111703    | 111655    |
| Sma-1-20003 | NW_003038506.1 | - | 237438    | 237390    |
| Sma-1-20004 | NS_000200.1    | - | 336599277 | 336599229 |
| Sma-1-20005 | NS_000200.1    | - | 215528455 | 215528407 |
| Sma-1-20006 | NS_000200.1    | - | 170668418 | 170668370 |
| Sma-1-20007 | NW_003037797.1 | - | 2571944   | 2571896   |
| Sma-1-20008 | NS_000200.1    | - | 12999804  | 12999756  |
| Sma-1-20009 | NW_003037900.1 | - | 231347    | 231299    |
| Sma-1-20010 | NS_000200.1    | - | 145360213 | 145360165 |
| Sma-1-20011 | NW_003037848.1 | - | 764232    | 764184    |
| Sma-1-20012 | NS_000200.1    | - | 90457303  | 90457255  |
| Sma-1-20013 | NW_003038059.1 | + | 187836    | 187884    |
| Sma-1-20014 | NS_000200.1    | + | 260429908 | 260429956 |
| Sma-1-20015 | NW_003038079.1 | - | 25191     | 25144     |
| Sma-1-20016 | NS_000200.1    | - | 268155179 | 268155132 |
| Sma-1-20017 | NW_003038502.1 | + | 146304    | 146352    |
| Sma-1-20018 | NS_000200.1    | + | 335145349 | 335145397 |
| Sma-1-20019 | NW_003037831.1 | - | 1694801   | 1694753   |
| Sma-1-20020 | NS_000200.1    | - | 71144103  | 71144055  |
| Sma-1-20021 | NW_003037917.1 | - | 1222828   | 1222780   |
| Sma-1-20022 | NS_000200.1    | - | 166259632 | 166259584 |
| Sma-1-20023 | NW_003037851.1 | - | 265509    | 265461    |
| Sma-1-20024 | NS_000200.1    | - | 93668819  | 93668771  |
| Sma-1-20025 | NW_003037928.1 | + | 5498      | 5546      |
| Sma-1-20026 | NS_000200.1    | + | 174329451 | 174329499 |
| Sma-1-20027 | NW_003037916.1 | + | 928996    | 929044    |
| Sma-1-20028 | NS_000200.1    | + | 164122407 | 164122455 |
| Sma-1-20029 | NW_003037924.1 | - | 259965    | 259917    |
| Sma-1-20030 | NS_000200.1    | - | 171966923 | 171966875 |

|             |                |   |           |           |
|-------------|----------------|---|-----------|-----------|
| Sma-1-20031 | NW_003026610.1 | + | 10252     | 10300     |
| Sma-1-20032 | NS_000200.1    | + | 310165622 | 310165670 |
| Sma-1-20033 | NW_003037793.1 | + | 3514873   | 3514921   |
| Sma-1-20034 | NW_003038022.1 | - | 285885    | 285837    |
| Sma-1-20035 | NS_000200.1    | + | 3514873   | 3514921   |
| Sma-1-20036 | NS_000200.1    | - | 235966727 | 235966679 |
| Sma-1-20037 | NW_003037962.1 | + | 149751    | 149799    |
| Sma-1-20038 | NW_003037829.1 | - | 619895    | 619847    |
| Sma-1-20039 | NW_003037975.1 | + | 578693    | 578741    |
| Sma-1-20040 | NW_003038503.1 | + | 66234     | 66282     |
| Sma-1-20041 | NS_000200.1    | + | 196226594 | 196226642 |
| Sma-1-20042 | NS_000200.1    | + | 206160917 | 206160965 |
| Sma-1-20043 | NS_000200.1    | + | 335592284 | 335592332 |
| Sma-1-20044 | NS_000200.1    | - | 66520433  | 66520385  |
| Sma-1-20045 | NW_003037800.1 | - | 1884848   | 1884800   |
| Sma-1-20046 | NS_000200.1    | - | 20514208  | 20514160  |
| Sma-1-20047 | NW_003037827.1 | - | 678204    | 678156    |
| Sma-1-20048 | NS_000200.1    | - | 63300345  | 63300297  |
| Sma-1-20049 | NW_003026615.1 | - | 133212    | 133164    |
| Sma-1-20050 | NW_003037863.1 | + | 576344    | 576392    |
| Sma-1-20051 | NS_000200.1    | + | 107334711 | 107334759 |
| Sma-1-20052 | NS_000200.1    | - | 317127653 | 317127605 |
| Sma-1-20053 | NW_003037928.1 | - | 771530    | 771482    |
| Sma-1-20054 | NS_000200.1    | - | 175095483 | 175095435 |
| Sma-1-20055 | NW_003037814.1 | - | 1411248   | 1411200   |
| Sma-1-20056 | NW_003037902.1 | - | 752898    | 752850    |
| Sma-1-20057 | NW_003037915.1 | + | 860101    | 860149    |
| Sma-1-20058 | NW_003038007.1 | - | 344328    | 344280    |
| Sma-1-20059 | NW_003038077.1 | - | 327361    | 327313    |
| Sma-1-20060 | NS_000200.1    | + | 162760087 | 162760135 |
| Sma-1-20061 | NS_000200.1    | - | 267099001 | 267098953 |
| Sma-1-20062 | NS_000200.1    | - | 225592883 | 225592835 |
| Sma-1-20063 | NS_000200.1    | - | 147508132 | 147508084 |
| Sma-1-20064 | NS_000200.1    | - | 44395108  | 44395060  |
| Sma-1-20065 | NW_003037796.1 | + | 260509    | 260557    |
| Sma-1-20066 | NS_000200.1    | + | 8470153   | 8470201   |
| Sma-1-20067 | NW_003037800.1 | - | 1020647   | 1020599   |
| Sma-1-20068 | NS_000200.1    | - | 19650007  | 19649959  |
| Sma-1-20069 | NW_003037925.1 | + | 342091    | 342139    |
| Sma-1-20070 | NS_000200.1    | + | 172744094 | 172744142 |
| Sma-1-20071 | NW_003037809.1 | + | 2231013   | 2231061   |
| Sma-1-20072 | NW_003037910.1 | - | 987549    | 987501    |
| Sma-1-20073 | NS_000200.1    | + | 35895477  | 35895525  |
| Sma-1-20074 | NS_000200.1    | - | 155499524 | 155499476 |
| Sma-1-20075 | NW_003037799.1 | - | 714158    | 714110    |
| Sma-1-20076 | NS_000200.1    | - | 17704512  | 17704464  |
| Sma-1-20077 | NW_003037916.1 | + | 1735333   | 1735381   |
| Sma-1-20078 | NS_000200.1    | + | 164928744 | 164928792 |
| Sma-1-20079 | NW_003037931.1 | - | 641474    | 641426    |
| Sma-1-20080 | NS_000200.1    | - | 177474141 | 177474093 |
| Sma-1-20081 | NW_003038016.1 | - | 376192    | 376141    |
| Sma-1-20082 | NW_003038016.1 | - | 363371    | 363320    |

|             |                |   |           |           |
|-------------|----------------|---|-----------|-----------|
| Sma-1-20083 | NS_000200.1    | - | 231492729 | 231492678 |
| Sma-1-20084 | NS_000200.1    | - | 231479908 | 231479857 |
| Sma-1-20085 | NW_003038224.1 | - | 113268    | 113217    |
| Sma-1-20086 | NS_000200.1    | - | 309524996 | 309524945 |
| Sma-1-20087 | NW_003037793.1 | + | 4157763   | 4157814   |
| Sma-1-20088 | NS_000200.1    | + | 4157763   | 4157814   |
| Sma-1-20089 | NW_003037881.1 | - | 416240    | 416189    |
| Sma-1-20090 | NS_000200.1    | - | 124848031 | 124847980 |
| Sma-1-20091 | NW_003038010.1 | - | 554577    | 554526    |
| Sma-1-20092 | NS_000200.1    | - | 227372800 | 227372749 |
| Sma-1-20093 | NW_003032160.1 | - | 226462    | 226411    |
| Sma-1-20094 | NS_000200.1    | - | 381234548 | 381234497 |
| Sma-1-20095 | NW_003037851.1 | + | 890100    | 890151    |
| Sma-1-20096 | NS_000200.1    | + | 94293410  | 94293461  |
| Sma-1-20097 | NW_003037902.1 | - | 144567    | 144516    |
| Sma-1-20098 | NS_000200.1    | - | 146899801 | 146899750 |
| Sma-1-20099 | NW_003037889.1 | + | 1323185   | 1323236   |
| Sma-1-20100 | NS_000200.1    | + | 135099675 | 135099726 |
| Sma-1-20101 | NW_003038044.1 | + | 116995    | 117046    |
| Sma-1-20102 | NS_000200.1    | + | 254741777 | 254741828 |
| Sma-1-20103 | NW_003038044.1 | - | 123568    | 123517    |
| Sma-1-20104 | NS_000200.1    | - | 254748350 | 254748299 |
| Sma-1-20105 | NW_003037846.1 | + | 172523    | 172574    |
| Sma-1-20106 | NS_000200.1    | + | 87807093  | 87807144  |
| Sma-1-20107 | NW_003037781.1 | - | 1748      | 1697      |
| Sma-1-20108 | NS_000200.1    | - | 379082168 | 379082117 |
| Sma-1-20109 | NW_003037802.1 | - | 1358559   | 1358508   |
| Sma-1-20110 | NS_000200.1    | - | 23361353  | 23361302  |
| Sma-1-20111 | NW_003038517.1 | + | 248521    | 248572    |
| Sma-1-20112 | NS_000200.1    | + | 341013009 | 341013060 |
| Sma-1-20113 | NW_003038141.1 | + | 289305    | 289356    |
| Sma-1-20114 | NS_000200.1    | + | 287179284 | 287179335 |
| Sma-1-20115 | NW_003037809.1 | + | 1522856   | 1522907   |
| Sma-1-20116 | NS_000200.1    | + | 35187320  | 35187371  |
| Sma-1-20117 | NW_003035681.1 | + | 35869     | 35920     |
| Sma-1-20118 | NW_003035681.1 | + | 55216     | 55267     |
| Sma-1-20119 | NS_000200.1    | + | 332047309 | 332047360 |
| Sma-1-20120 | NS_000200.1    | + | 332066656 | 332066707 |
| Sma-1-20121 | NW_003032160.1 | + | 51201     | 51252     |
| Sma-1-20122 | NW_003032160.1 | - | 49223     | 49172     |
| Sma-1-20123 | NW_003037899.1 | + | 496036    | 496087    |
| Sma-1-20124 | NS_000200.1    | + | 145015147 | 145015198 |
| Sma-1-20125 | NS_000200.1    | + | 381059287 | 381059338 |
| Sma-1-20126 | NS_000200.1    | - | 381057309 | 381057258 |
| Sma-1-20127 | NW_003026616.1 | + | 82303     | 82354     |
| Sma-1-20128 | NS_000200.1    | + | 317438902 | 317438953 |
| Sma-1-20129 | NW_003026516.1 | + | 491653    | 491704    |
| Sma-1-20130 | NS_000200.1    | + | 299599950 | 299600001 |
| Sma-1-20131 | NW_003038143.1 | - | 230666    | 230615    |
| Sma-1-20132 | NS_000200.1    | - | 287990158 | 287990107 |
| Sma-1-20133 | NW_003038249.1 | - | 238344    | 238293    |
| Sma-1-20134 | NS_000200.1    | - | 316920597 | 316920546 |

|             |                |   |           |           |
|-------------|----------------|---|-----------|-----------|
| Sma-1-20135 | NW_003038249.1 | - | 87235     | 87184     |
| Sma-1-20136 | NS_000200.1    | - | 316769488 | 316769437 |
| Sma-1-20137 | NW_003034233.1 | + | 2343      | 2394      |
| Sma-1-20138 | NW_003026469.1 | + | 158273    | 158324    |
| Sma-1-20139 | NW_003037914.1 | + | 1600862   | 1600913   |
| Sma-1-20140 | NW_003038507.1 | - | 15793     | 15742     |
| Sma-1-20141 | NW_003038077.1 | + | 110640    | 110691    |
| Sma-1-20142 | NS_000200.1    | + | 161745112 | 161745163 |
| Sma-1-20143 | NS_000200.1    | + | 217779932 | 217779983 |
| Sma-1-20144 | NS_000200.1    | + | 266882280 | 266882331 |
| Sma-1-20145 | NS_000200.1    | + | 326601348 | 326601399 |
| Sma-1-20146 | NS_000200.1    | - | 336684687 | 336684636 |
| Sma-1-20147 | NW_003038038.1 | - | 989949    | 989899    |
| Sma-1-20148 | NS_000200.1    | - | 252893342 | 252893292 |
| Sma-1-20149 | NW_003037915.1 | + | 843546    | 843594    |
| Sma-1-20150 | NS_000200.1    | + | 162743532 | 162743580 |
| Sma-1-20151 | NW_003037810.1 | + | 1105391   | 1105439   |
| Sma-1-20152 | NS_000200.1    | + | 37709913  | 37709961  |
| Sma-1-20153 | NW_003037810.1 | - | 1136661   | 1136613   |
| Sma-1-20154 | NW_003026510.1 | - | 238418    | 238370    |
| Sma-1-20155 | NS_000200.1    | - | 283678599 | 283678551 |
| Sma-1-20156 | NS_000200.1    | - | 37741183  | 37741135  |
| Sma-1-20157 | NW_003037964.1 | + | 481915    | 481963    |
| Sma-1-20158 | NS_000200.1    | + | 198083437 | 198083485 |
| Sma-1-20159 | NW_003037898.1 | - | 383293    | 383245    |
| Sma-1-20160 | NW_003037872.1 | + | 24403     | 24451     |
| Sma-1-20161 | NS_000200.1    | + | 117981409 | 117981457 |
| Sma-1-20162 | NS_000200.1    | - | 144367115 | 144367067 |
| Sma-1-20163 | NW_003026471.1 | - | 74037     | 73989     |
| Sma-1-20164 | NS_000200.1    | - | 222186270 | 222186222 |
| Sma-1-20165 | NW_003037812.1 | - | 1260287   | 1260239   |
| Sma-1-20166 | NS_000200.1    | - | 40743026  | 40742978  |
| Sma-1-20167 | NW_003037812.1 | - | 1261083   | 1261035   |
| Sma-1-20168 | NW_003038041.1 | - | 75385     | 75337     |
| Sma-1-20169 | NS_000200.1    | - | 253742667 | 253742619 |
| Sma-1-20170 | NS_000200.1    | - | 40743822  | 40743774  |
| Sma-1-20171 | NW_003037935.1 | + | 439589    | 439637    |
| Sma-1-20172 | NS_000200.1    | + | 179856124 | 179856172 |
| Sma-1-20173 | NW_003030309.1 | + | 462       | 510       |
| Sma-1-20174 | NS_000200.1    | + | 362644069 | 362644117 |
| Sma-1-20175 | NW_003037962.1 | + | 265915    | 265963    |
| Sma-1-20176 | NS_000200.1    | + | 196342758 | 196342806 |
| Sma-1-20177 | NW_003037915.1 | - | 135060    | 135012    |
| Sma-1-20178 | NS_000200.1    | - | 162035046 | 162034998 |
| Sma-1-20179 | NW_003037813.1 | + | 1331489   | 1331537   |
| Sma-1-20180 | NS_000200.1    | + | 42318352  | 42318400  |
| Sma-1-20181 | NW_003037795.1 | + | 1135240   | 1135288   |
| Sma-1-20182 | NS_000200.1    | + | 7526123   | 7526171   |
| Sma-1-20183 | NW_003037814.1 | + | 13784     | 13832     |
| Sma-1-20184 | NS_000200.1    | + | 42997644  | 42997692  |
| Sma-1-20185 | NW_003037803.1 | + | 1582648   | 1582696   |
| Sma-1-20186 | NS_000200.1    | + | 25083185  | 25083233  |



|             |                |   |           |           |
|-------------|----------------|---|-----------|-----------|
| Sma-1-20187 | NW_003037971.1 | + | 310700    | 310748    |
| Sma-1-20188 | NS_000200.1    | + | 201932750 | 201932798 |
| Sma-1-20189 | NW_003037703.1 | + | 279       | 327       |
| Sma-1-20190 | NS_000200.1    | + | 375582281 | 375582329 |
| Sma-1-20191 | NW_003037814.1 | - | 1084546   | 1084498   |
| Sma-1-20192 | NS_000200.1    | - | 44068406  | 44068358  |
| Sma-1-20193 | NW_003037814.1 | - | 1093414   | 1093366   |
| Sma-1-20194 | NS_000200.1    | - | 44077274  | 44077226  |
| Sma-1-20195 | NW_003037794.1 | - | 1803966   | 1803918   |
| Sma-1-20196 | NW_003038515.1 | + | 335953    | 336001    |
| Sma-1-20197 | NS_000200.1    | + | 340420018 | 340420066 |
| Sma-1-20198 | NS_000200.1    | - | 5983561   | 5983513   |
| Sma-1-20199 | NW_003037793.1 | - | 3303691   | 3303643   |
| Sma-1-20200 | NS_000200.1    | - | 3303691   | 3303643   |
| Sma-1-20201 | NW_003037814.1 | - | 2061791   | 2061743   |
| Sma-1-20202 | NS_000200.1    | - | 45045651  | 45045603  |
| Sma-1-20203 | NW_003037814.1 | + | 227665    | 227713    |
| Sma-1-20204 | NS_000200.1    | + | 43211525  | 43211573  |
| Sma-1-20205 | NW_003026460.1 | - | 368184    | 368136    |
| Sma-1-20206 | NW_003038026.1 | - | 488792    | 488744    |
| Sma-1-20207 | NS_000200.1    | - | 239996553 | 239996505 |
| Sma-1-20208 | NS_000200.1    | - | 170890390 | 170890342 |
| Sma-1-20209 | NW_003037940.1 | + | 471012    | 471060    |
| Sma-1-20210 | NS_000200.1    | + | 184213142 | 184213190 |
| Sma-1-20211 | NW_003037942.1 | + | 521406    | 521454    |
| Sma-1-20212 | NS_000200.1    | + | 186281314 | 186281362 |
| Sma-1-20213 | NW_003037793.1 | - | 2592068   | 2592020   |
| Sma-1-20214 | NS_000200.1    | - | 2592068   | 2592020   |
| Sma-1-20215 | NW_003037814.1 | - | 602608    | 602560    |
| Sma-1-20216 | NS_000200.1    | - | 43586468  | 43586420  |
| Sma-1-20217 | NW_003037939.1 | - | 430814    | 430766    |
| Sma-1-20218 | NS_000200.1    | - | 183300568 | 183300520 |
| Sma-1-20219 | NW_003037792.1 | - | 454975    | 454927    |
| Sma-1-20220 | NW_003037824.1 | + | 615183    | 615231    |
| Sma-1-20221 | NS_000200.1    | + | 57546123  | 57546171  |
| Sma-1-20222 | NS_000200.1    | - | 382892319 | 382892271 |
| Sma-1-20223 | NW_003037958.1 | - | 337489    | 337441    |
| Sma-1-20224 | NS_000200.1    | - | 195001673 | 195001625 |
| Sma-1-20225 | NW_003037918.1 | - | 92603     | 92555     |
| Sma-1-20226 | NS_000200.1    | - | 166659593 | 166659545 |
| Sma-1-20227 | NW_003037962.1 | + | 387419    | 387467    |
| Sma-1-20228 | NS_000200.1    | + | 196464262 | 196464310 |
| Sma-1-20229 | NW_003038018.1 | - | 325998    | 325950    |
| Sma-1-20230 | NS_000200.1    | - | 232726848 | 232726800 |
| Sma-1-20231 | NW_003035734.1 | - | 2326      | 2278      |
| Sma-1-20232 | NW_003035849.1 | - | 1023      | 975       |
| Sma-1-20233 | NW_003037937.1 | - | 135024    | 134976    |
| Sma-1-20234 | NW_003037995.1 | + | 91893     | 91941     |
| Sma-1-20235 | NW_003037995.1 | + | 256469    | 256517    |
| Sma-1-20236 | NW_003037809.1 | - | 1009710   | 1009662   |
| Sma-1-20237 | NW_003037825.1 | - | 1429513   | 1429465   |
| Sma-1-20238 | NW_003037838.1 | - | 891741    | 891693    |

|             |                |   |           |           |
|-------------|----------------|---|-----------|-----------|
| Sma-1-20239 | NW_003037860.1 | - | 449751    | 449703    |
| Sma-1-20240 | NW_003037872.1 | + | 59704     | 59752     |
| Sma-1-20241 | NW_003037887.1 | - | 1573022   | 1572974   |
| Sma-1-20242 | NW_003037918.1 | - | 1990693   | 1990645   |
| Sma-1-20243 | NW_003037923.1 | + | 100334    | 100382    |
| Sma-1-20244 | NW_003037931.1 | + | 317447    | 317495    |
| Sma-1-20245 | NW_003037932.1 | + | 705486    | 705534    |
| Sma-1-20246 | NW_003037941.1 | + | 701846    | 701894    |
| Sma-1-20247 | NW_003037981.1 | + | 342252    | 342300    |
| Sma-1-20248 | NW_003037981.1 | - | 139165    | 139117    |
| Sma-1-20249 | NW_003038227.1 | + | 275580    | 275628    |
| Sma-1-20250 | NW_003039127.1 | - | 599531    | 599483    |
| Sma-1-20251 | NW_003026483.1 | - | 50809     | 50761     |
| Sma-1-20252 | NW_003038042.1 | - | 153775    | 153727    |
| Sma-1-20253 | NW_003038153.1 | - | 554871    | 554823    |
| Sma-1-20254 | NS_000200.1    | + | 118016710 | 118016758 |
| Sma-1-20255 | NS_000200.1    | + | 171156547 | 171156595 |
| Sma-1-20256 | NS_000200.1    | + | 177150114 | 177150162 |
| Sma-1-20257 | NS_000200.1    | + | 178238682 | 178238730 |
| Sma-1-20258 | NS_000200.1    | + | 185436320 | 185436368 |
| Sma-1-20259 | NS_000200.1    | + | 212740120 | 212740168 |
| Sma-1-20260 | NS_000200.1    | + | 219781661 | 219781709 |
| Sma-1-20261 | NS_000200.1    | + | 219946237 | 219946285 |
| Sma-1-20262 | NS_000200.1    | + | 310556934 | 310556982 |
| Sma-1-20263 | NS_000200.1    | - | 364222474 | 364222426 |
| Sma-1-20264 | NS_000200.1    | - | 363971559 | 363971511 |
| Sma-1-20265 | NS_000200.1    | - | 293616920 | 293616872 |
| Sma-1-20266 | NS_000200.1    | - | 256565333 | 256565285 |
| Sma-1-20267 | NS_000200.1    | - | 254099374 | 254099326 |
| Sma-1-20268 | NS_000200.1    | - | 212537033 | 212536985 |
| Sma-1-20269 | NS_000200.1    | - | 181334933 | 181334885 |
| Sma-1-20270 | NS_000200.1    | - | 168557683 | 168557635 |
| Sma-1-20271 | NS_000200.1    | - | 132037000 | 132036952 |
| Sma-1-20272 | NS_000200.1    | - | 113677030 | 113676982 |
| Sma-1-20273 | NS_000200.1    | - | 104192779 | 104192731 |
| Sma-1-20274 | NS_000200.1    | - | 78890304  | 78890256  |
| Sma-1-20275 | NS_000200.1    | - | 60559295  | 60559247  |
| Sma-1-20276 | NS_000200.1    | - | 34674174  | 34674126  |
| Sma-1-20277 | NW_003037815.1 | - | 606106    | 606058    |
| Sma-1-20278 | NW_003037822.1 | + | 775835    | 775883    |
| Sma-1-20279 | NW_003037844.1 | + | 456069    | 456117    |
| Sma-1-20280 | NW_003038083.1 | - | 9584      | 9536      |
| Sma-1-20281 | NS_000200.1    | + | 55083841  | 55083889  |
| Sma-1-20282 | NS_000200.1    | + | 86639515  | 86639563  |
| Sma-1-20283 | NS_000200.1    | - | 270252921 | 270252873 |
| Sma-1-20284 | NS_000200.1    | - | 45869097  | 45869049  |
| Sma-1-20285 | NW_003037817.1 | - | 484698    | 484650    |
| Sma-1-20286 | NW_003038033.1 | + | 146057    | 146105    |
| Sma-1-20287 | NS_000200.1    | + | 246126059 | 246126107 |
| Sma-1-20288 | NS_000200.1    | - | 47867050  | 47867002  |
| Sma-1-20289 | NW_003035810.1 | + | 1286      | 1334      |
| Sma-1-20290 | NW_003037815.1 | + | 832789    | 832837    |

|             |                |   |           |           |
|-------------|----------------|---|-----------|-----------|
| Sma-1-20291 | NS_000200.1    | + | 46095780  | 46095828  |
| Sma-1-20292 | NS_000200.1    | + | 364135410 | 364135458 |
| Sma-1-20293 | NW_003038230.1 | - | 246142    | 246094    |
| Sma-1-20294 | NS_000200.1    | - | 311531713 | 311531665 |
| Sma-1-20295 | NW_003037827.1 | + | 181498    | 181546    |
| Sma-1-20296 | NS_000200.1    | + | 62803639  | 62803687  |
| Sma-1-20297 | NW_003037896.1 | - | 488454    | 488404    |
| Sma-1-20298 | NS_000200.1    | - | 143408877 | 143408827 |
| Sma-1-20299 | NW_003037874.1 | + | 58988     | 59036     |
| Sma-1-20300 | NS_000200.1    | + | 119483938 | 119483986 |
| Sma-1-20301 | NW_003029267.1 | - | 503       | 455       |
| Sma-1-20302 | NS_000200.1    | - | 357192321 | 357192273 |
| Sma-1-20303 | NW_003037945.1 | - | 998570    | 998522    |
| Sma-1-20304 | NS_000200.1    | - | 190100534 | 190100486 |
| Sma-1-20305 | NW_003038027.1 | - | 330859    | 330811    |
| Sma-1-20306 | NS_000200.1    | - | 240701573 | 240701525 |
| Sma-1-20307 | NW_003035880.1 | + | 5730      | 5778      |
| Sma-1-20308 | NS_000200.1    | + | 339246794 | 339246842 |
| Sma-1-20309 | NW_003037951.1 | + | 134657    | 134705    |
| Sma-1-20310 | NS_000200.1    | + | 192812382 | 192812430 |
| Sma-1-20311 | NW_003037910.1 | - | 943479    | 943431    |
| Sma-1-20312 | NS_000200.1    | - | 155455454 | 155455406 |
| Sma-1-20313 | NW_003037821.1 | + | 703284    | 703332    |
| Sma-1-20314 | NS_000200.1    | + | 53847768  | 53847816  |
| Sma-1-20315 | NW_003037910.1 | - | 1201251   | 1201203   |
| Sma-1-20316 | NW_003038157.1 | - | 630695    | 630647    |
| Sma-1-20317 | NS_000200.1    | - | 295881615 | 295881567 |
| Sma-1-20318 | NS_000200.1    | - | 155713226 | 155713178 |
| Sma-1-20319 | NW_003037822.1 | - | 3357      | 3309      |
| Sma-1-20320 | NS_000200.1    | - | 54311363  | 54311315  |
| Sma-1-20321 | NW_003037964.1 | - | 657394    | 657346    |
| Sma-1-20322 | NS_000200.1    | - | 198258916 | 198258868 |
| Sma-1-20323 | NW_003037908.1 | - | 992499    | 992451    |
| Sma-1-20324 | NS_000200.1    | - | 153465630 | 153465582 |
| Sma-1-20325 | NW_003029072.1 | - | 961       | 913       |
| Sma-1-20326 | NS_000200.1    | - | 375331226 | 375331178 |
| Sma-1-20327 | NW_003037824.1 | + | 973910    | 973958    |
| Sma-1-20328 | NS_000200.1    | + | 57904850  | 57904898  |
| Sma-1-20329 | NW_003037970.1 | - | 215209    | 215161    |
| Sma-1-20330 | NS_000200.1    | - | 201271399 | 201271351 |
| Sma-1-20331 | NW_003037971.1 | + | 405703    | 405751    |
| Sma-1-20332 | NS_000200.1    | + | 202027753 | 202027801 |
| Sma-1-20333 | NW_003026617.1 | - | 33193     | 33145     |
| Sma-1-20334 | NS_000200.1    | - | 319604052 | 319604004 |
| Sma-1-20335 | NW_003037902.1 | + | 364600    | 364648    |
| Sma-1-20336 | NS_000200.1    | + | 147119834 | 147119882 |
| Sma-1-20337 | NW_003038131.1 | - | 178565    | 178517    |
| Sma-1-20338 | NS_000200.1    | - | 282140409 | 282140361 |
| Sma-1-20339 | NW_003037896.1 | + | 172469    | 172517    |
| Sma-1-20340 | NS_000200.1    | + | 143092892 | 143092940 |
| Sma-1-20341 | NW_003026615.1 | + | 93385     | 93433     |
| Sma-1-20342 | NS_000200.1    | + | 317087826 | 317087874 |

|             |                |   |           |           |
|-------------|----------------|---|-----------|-----------|
| Sma-1-20343 | NW_003037866.1 | - | 433155    | 433107    |
| Sma-1-20344 | NS_000200.1    | - | 111920954 | 111920906 |
| Sma-1-20345 | NW_003038011.1 | + | 541245    | 541293    |
| Sma-1-20346 | NS_000200.1    | + | 228068895 | 228068943 |
| Sma-1-20347 | NW_003037829.1 | - | 1510413   | 1510365   |
| Sma-1-20348 | NW_003039127.1 | - | 509757    | 509709    |
| Sma-1-20349 | NW_003038132.1 | + | 336697    | 336745    |
| Sma-1-20350 | NS_000200.1    | + | 282757167 | 282757215 |
| Sma-1-20351 | NS_000200.1    | - | 113587256 | 113587208 |
| Sma-1-20352 | NS_000200.1    | - | 67410951  | 67410903  |
| Sma-1-20353 | NW_003034051.1 | - | 268       | 220       |
| Sma-1-20354 | NW_003037797.1 | - | 288091    | 288043    |
| Sma-1-20355 | NS_000200.1    | - | 363610785 | 363610737 |
| Sma-1-20356 | NS_000200.1    | - | 10715951  | 10715903  |
| Sma-1-20357 | NW_003037942.1 | + | 653668    | 653716    |
| Sma-1-20358 | NS_000200.1    | + | 186413576 | 186413624 |
| Sma-1-20359 | NW_003037826.1 | + | 590429    | 590477    |
| Sma-1-20360 | NS_000200.1    | + | 61589945  | 61589993  |
| Sma-1-20361 | NW_003037827.1 | + | 1144166   | 1144214   |
| Sma-1-20362 | NW_003038039.1 | - | 86460     | 86412     |
| Sma-1-20363 | NS_000200.1    | + | 63766307  | 63766355  |
| Sma-1-20364 | NS_000200.1    | - | 253524306 | 253524258 |
| Sma-1-20365 | NW_003037834.1 | + | 890035    | 890083    |
| Sma-1-20366 | NS_000200.1    | + | 74050521  | 74050569  |
| Sma-1-20367 | NW_003037981.1 | - | 16212     | 16164     |
| Sma-1-20368 | NS_000200.1    | - | 212414080 | 212414032 |
| Sma-1-20369 | NW_003037973.1 | - | 120209    | 120161    |
| Sma-1-20370 | NS_000200.1    | - | 204101936 | 204101888 |
| Sma-1-20371 | NW_003037974.1 | + | 721556    | 721604    |
| Sma-1-20372 | NS_000200.1    | + | 205396862 | 205396910 |
| Sma-1-20373 | NW_003026597.1 | - | 146686    | 146638    |
| Sma-1-20374 | NS_000200.1    | - | 305767872 | 305767824 |
| Sma-1-20375 | NW_003026517.1 | + | 600520    | 600568    |
| Sma-1-20376 | NS_000200.1    | + | 300206529 | 300206577 |
| Sma-1-20377 | NW_003037827.1 | - | 699699    | 699651    |
| Sma-1-20378 | NS_000200.1    | - | 63321840  | 63321792  |
| Sma-1-20379 | NW_003037907.1 | + | 611284    | 611332    |
| Sma-1-20380 | NS_000200.1    | + | 152015773 | 152015821 |
| Sma-1-20381 | NW_003037829.1 | + | 1101831   | 1101879   |
| Sma-1-20382 | NS_000200.1    | + | 67002369  | 67002417  |
| Sma-1-20383 | NW_003026472.1 | + | 608348    | 608396    |
| Sma-1-20384 | NS_000200.1    | + | 237020340 | 237020388 |
| Sma-1-20385 | NW_003037830.1 | - | 86610     | 86562     |
| Sma-1-20386 | NS_000200.1    | - | 67976981  | 67976933  |
| Sma-1-20387 | NW_003026469.1 | + | 147353    | 147401    |
| Sma-1-20388 | NS_000200.1    | + | 217769012 | 217769060 |
| Sma-1-20389 | NW_003037979.1 | + | 95723     | 95771     |
| Sma-1-20390 | NW_003038505.1 | + | 18894     | 18942     |
| Sma-1-20391 | NS_000200.1    | + | 210156743 | 210156791 |
| Sma-1-20392 | NS_000200.1    | + | 336098231 | 336098279 |
| Sma-1-20393 | NW_003026465.1 | + | 884352    | 884400    |
| Sma-1-20394 | NS_000200.1    | + | 208276946 | 208276994 |

|             |                |   |           |           |
|-------------|----------------|---|-----------|-----------|
| Sma-1-20395 | NW_003037831.1 | + | 1652332   | 1652380   |
| Sma-1-20396 | NW_003037838.1 | - | 174344    | 174296    |
| Sma-1-20397 | NW_003037897.1 | - | 68436     | 68388     |
| Sma-1-20398 | NW_003037933.1 | + | 577644    | 577692    |
| Sma-1-20399 | NW_003037987.1 | - | 30385     | 30337     |
| Sma-1-20400 | NW_003038031.1 | + | 509597    | 509645    |
| Sma-1-20401 | NW_003038037.1 | + | 1166905   | 1166953   |
| Sma-1-20402 | NS_000200.1    | + | 71101634  | 71101682  |
| Sma-1-20403 | NS_000200.1    | + | 178990816 | 178990864 |
| Sma-1-20404 | NS_000200.1    | + | 244787355 | 244787403 |
| Sma-1-20405 | NS_000200.1    | + | 251322314 | 251322362 |
| Sma-1-20406 | NS_000200.1    | - | 215783006 | 215782958 |
| Sma-1-20407 | NS_000200.1    | - | 143550812 | 143550764 |
| Sma-1-20408 | NS_000200.1    | - | 78172907  | 78172859  |
| Sma-1-20409 | NW_003026465.1 | + | 533550    | 533598    |
| Sma-1-20410 | NS_000200.1    | + | 207926144 | 207926192 |
| Sma-1-20411 | NW_003037839.1 | + | 1149134   | 1149182   |
| Sma-1-20412 | NS_000200.1    | + | 80107284  | 80107332  |
| Sma-1-20413 | NW_003038249.1 | + | 259940    | 259988    |
| Sma-1-20414 | NS_000200.1    | + | 316942193 | 316942241 |
| Sma-1-20415 | NW_003037935.1 | - | 306733    | 306685    |
| Sma-1-20416 | NW_003037941.1 | + | 960657    | 960705    |
| Sma-1-20417 | NW_003038087.1 | + | 417472    | 417520    |
| Sma-1-20418 | NS_000200.1    | + | 185695131 | 185695179 |
| Sma-1-20419 | NS_000200.1    | + | 273445873 | 273445921 |
| Sma-1-20420 | NS_000200.1    | - | 179723268 | 179723220 |
| Sma-1-20421 | NW_003038145.1 | + | 194212    | 194260    |
| Sma-1-20422 | NS_000200.1    | + | 288805635 | 288805683 |
| Sma-1-20423 | NW_003037852.1 | + | 776036    | 776084    |
| Sma-1-20424 | NS_000200.1    | + | 95167931  | 95167979  |
| Sma-1-20425 | NW_003026456.1 | + | 1036009   | 1036057   |
| Sma-1-20426 | NW_003037935.1 | + | 764987    | 765035    |
| Sma-1-20427 | NS_000200.1    | + | 58959145  | 58959193  |
| Sma-1-20428 | NS_000200.1    | + | 180181522 | 180181570 |
| Sma-1-20429 | NW_003038250.1 | - | 51448     | 51400     |
| Sma-1-20430 | NS_000200.1    | - | 318104125 | 318104077 |
| Sma-1-20431 | NW_003024620.1 | - | 1450      | 1402      |
| Sma-1-20432 | NW_003030267.1 | + | 216       | 264       |
| Sma-1-20433 | NW_003031917.1 | - | 752       | 704       |
| Sma-1-20434 | NW_003033790.1 | + | 4171      | 4219      |
| Sma-1-20435 | NW_003034089.1 | + | 919       | 967       |
| Sma-1-20436 | NW_003035788.1 | - | 970       | 922       |
| Sma-1-20437 | NW_003035874.1 | + | 33929     | 33977     |
| Sma-1-20438 | NW_003037874.1 | + | 379964    | 380012    |
| Sma-1-20439 | NW_003037898.1 | + | 472629    | 472677    |
| Sma-1-20440 | NW_003038005.1 | + | 406850    | 406898    |
| Sma-1-20441 | NW_003026619.1 | + | 254716    | 254764    |
| Sma-1-20442 | NW_003037793.1 | + | 1467308   | 1467356   |
| Sma-1-20443 | NW_003037795.1 | - | 1111677   | 1111629   |
| Sma-1-20444 | NW_003037798.1 | - | 1367266   | 1367218   |
| Sma-1-20445 | NW_003037818.1 | + | 2214507   | 2214555   |
| Sma-1-20446 | NW_003037822.1 | + | 1379889   | 1379937   |

|             |                |   |           |           |
|-------------|----------------|---|-----------|-----------|
| Sma-1-20447 | NW_003037835.1 | - | 687440    | 687392    |
| Sma-1-20448 | NW_003037840.1 | + | 545581    | 545629    |
| Sma-1-20449 | NW_003037840.1 | - | 1463832   | 1463784   |
| Sma-1-20450 | NW_003037841.1 | - | 177318    | 177270    |
| Sma-1-20451 | NW_003037844.1 | + | 56435     | 56483     |
| Sma-1-20452 | NW_003037886.1 | - | 1063280   | 1063232   |
| Sma-1-20453 | NW_003037890.1 | + | 287273    | 287321    |
| Sma-1-20454 | NW_003037912.1 | + | 595646    | 595694    |
| Sma-1-20455 | NW_003037917.1 | - | 967349    | 967301    |
| Sma-1-20456 | NW_003037933.1 | + | 615715    | 615763    |
| Sma-1-20457 | NW_003037941.1 | + | 946463    | 946511    |
| Sma-1-20458 | NW_003037953.1 | + | 194422    | 194470    |
| Sma-1-20459 | NW_003037976.1 | - | 574519    | 574471    |
| Sma-1-20460 | NW_003038015.1 | - | 233107    | 233059    |
| Sma-1-20461 | NW_003038029.1 | + | 783323    | 783371    |
| Sma-1-20462 | NW_003038029.1 | - | 789502    | 789454    |
| Sma-1-20463 | NW_003038033.1 | - | 436594    | 436546    |
| Sma-1-20464 | NW_003038033.1 | - | 430944    | 430896    |
| Sma-1-20465 | NW_003038037.1 | - | 328964    | 328916    |
| Sma-1-20466 | NW_003039127.1 | - | 1982826   | 1982778   |
| Sma-1-20467 | NW_003038151.1 | + | 470828    | 470876    |
| Sma-1-20468 | NS_000200.1    | + | 1467308   | 1467356   |
| Sma-1-20469 | NS_000200.1    | + | 50929914  | 50929962  |
| Sma-1-20470 | NS_000200.1    | + | 55687895  | 55687943  |
| Sma-1-20471 | NS_000200.1    | + | 81168905  | 81168953  |
| Sma-1-20472 | NS_000200.1    | + | 86239881  | 86239929  |
| Sma-1-20473 | NS_000200.1    | + | 119804914 | 119804962 |
| Sma-1-20474 | NS_000200.1    | + | 135970634 | 135970682 |
| Sma-1-20475 | NS_000200.1    | + | 144456451 | 144456499 |
| Sma-1-20476 | NS_000200.1    | + | 157407221 | 157407269 |
| Sma-1-20477 | NS_000200.1    | + | 179028887 | 179028935 |
| Sma-1-20478 | NS_000200.1    | + | 185680937 | 185680985 |
| Sma-1-20479 | NS_000200.1    | + | 193107473 | 193107521 |
| Sma-1-20480 | NS_000200.1    | + | 224812804 | 224812852 |
| Sma-1-20481 | NS_000200.1    | + | 242984224 | 242984272 |
| Sma-1-20482 | NS_000200.1    | + | 292378071 | 292378119 |
| Sma-1-20483 | NS_000200.1    | + | 322445460 | 322445508 |
| Sma-1-20484 | NS_000200.1    | + | 336011473 | 336011521 |
| Sma-1-20485 | NS_000200.1    | + | 358984457 | 358984505 |
| Sma-1-20486 | NS_000200.1    | + | 362535791 | 362535839 |
| Sma-1-20487 | NS_000200.1    | + | 363711150 | 363711198 |
| Sma-1-20488 | NS_000200.1    | - | 367268853 | 367268805 |
| Sma-1-20489 | NS_000200.1    | - | 364092627 | 364092579 |
| Sma-1-20490 | NS_000200.1    | - | 348959615 | 348959567 |
| Sma-1-20491 | NS_000200.1    | - | 250484373 | 250484325 |
| Sma-1-20492 | NS_000200.1    | - | 246416596 | 246416548 |
| Sma-1-20493 | NS_000200.1    | - | 246410946 | 246410898 |
| Sma-1-20494 | NS_000200.1    | - | 242990403 | 242990355 |
| Sma-1-20495 | NS_000200.1    | - | 230556597 | 230556549 |
| Sma-1-20496 | NS_000200.1    | - | 207188834 | 207188786 |
| Sma-1-20497 | NS_000200.1    | - | 166004153 | 166004105 |
| Sma-1-20498 | NS_000200.1    | - | 130318847 | 130318799 |

|             |                |   |           |           |
|-------------|----------------|---|-----------|-----------|
| Sma-1-20499 | NS_000200.1    | - | 115060325 | 115060277 |
| Sma-1-20500 | NS_000200.1    | - | 82788499  | 82788451  |
| Sma-1-20501 | NS_000200.1    | - | 82087156  | 82087108  |
| Sma-1-20502 | NS_000200.1    | - | 75083948  | 75083900  |
| Sma-1-20503 | NS_000200.1    | - | 15626424  | 15626376  |
| Sma-1-20504 | NS_000200.1    | - | 7502560   | 7502512   |
| Sma-1-20505 | NW_003037833.1 | + | 949597    | 949645    |
| Sma-1-20506 | NW_003037833.1 | - | 950189    | 950141    |
| Sma-1-20507 | NS_000200.1    | + | 73140693  | 73140741  |
| Sma-1-20508 | NS_000200.1    | - | 73141285  | 73141237  |
| Sma-1-20509 | NW_003037982.1 | + | 693321    | 693369    |
| Sma-1-20510 | NS_000200.1    | + | 214352516 | 214352564 |
| Sma-1-20511 | NW_003037902.1 | + | 378211    | 378259    |
| Sma-1-20512 | NS_000200.1    | + | 147133445 | 147133493 |
| Sma-1-20513 | NW_003037834.1 | + | 258201    | 258249    |
| Sma-1-20514 | NS_000200.1    | + | 73418687  | 73418735  |
| Sma-1-20515 | NW_003037984.1 | - | 51719     | 51671     |
| Sma-1-20516 | NW_003037955.1 | - | 355681    | 355633    |
| Sma-1-20517 | NS_000200.1    | - | 215122807 | 215122759 |
| Sma-1-20518 | NS_000200.1    | - | 193982415 | 193982367 |
| Sma-1-20519 | NW_003037836.1 | + | 154247    | 154295    |
| Sma-1-20520 | NS_000200.1    | + | 75711346  | 75711394  |
| Sma-1-20521 | NW_003025565.1 | + | 176       | 224       |
| Sma-1-20522 | NW_003025565.1 | - | 631       | 583       |
| Sma-1-20523 | NS_000200.1    | + | 356168019 | 356168067 |
| Sma-1-20524 | NS_000200.1    | - | 356168474 | 356168426 |
| Sma-1-20525 | NW_003037844.1 | - | 36488     | 36440     |
| Sma-1-20526 | NS_000200.1    | - | 86219934  | 86219886  |
| Sma-1-20527 | NW_003037794.1 | - | 398863    | 398815    |
| Sma-1-20528 | NW_003037904.1 | + | 381347    | 381395    |
| Sma-1-20529 | NS_000200.1    | + | 149095846 | 149095894 |
| Sma-1-20530 | NS_000200.1    | - | 4578458   | 4578410   |
| Sma-1-20531 | NW_003035163.1 | + | 1252      | 1300      |
| Sma-1-20532 | NW_003037825.1 | - | 279765    | 279717    |
| Sma-1-20533 | NW_003037826.1 | + | 654645    | 654693    |
| Sma-1-20534 | NW_003037840.1 | - | 1921201   | 1921153   |
| Sma-1-20535 | NW_003037864.1 | - | 1790244   | 1790196   |
| Sma-1-20536 | NW_003037918.1 | - | 1057856   | 1057808   |
| Sma-1-20537 | NW_003037958.1 | - | 294288    | 294240    |
| Sma-1-20538 | NW_003037977.1 | - | 465542    | 465494    |
| Sma-1-20539 | NW_003038050.1 | + | 58305     | 58353     |
| Sma-1-20540 | NS_000200.1    | + | 61654161  | 61654209  |
| Sma-1-20541 | NS_000200.1    | + | 256333199 | 256333247 |
| Sma-1-20542 | NS_000200.1    | + | 370719636 | 370719684 |
| Sma-1-20543 | NS_000200.1    | - | 208751562 | 208751514 |
| Sma-1-20544 | NS_000200.1    | - | 194958472 | 194958424 |
| Sma-1-20545 | NS_000200.1    | - | 167624846 | 167624798 |
| Sma-1-20546 | NS_000200.1    | - | 110282818 | 110282770 |
| Sma-1-20547 | NS_000200.1    | - | 82544525  | 82544477  |
| Sma-1-20548 | NS_000200.1    | - | 59409547  | 59409499  |
| Sma-1-20549 | NW_003038130.1 | + | 57474     | 57523     |
| Sma-1-20550 | NS_000200.1    | + | 281612460 | 281612509 |

|             |                |   |           |           |
|-------------|----------------|---|-----------|-----------|
| Sma-1-20551 | NW_003037901.1 | + | 584054    | 584102    |
| Sma-1-20552 | NS_000200.1    | + | 146432515 | 146432563 |
| Sma-1-20553 | NW_003037837.1 | + | 1124388   | 1124436   |
| Sma-1-20554 | NS_000200.1    | + | 77930246  | 77930294  |
| Sma-1-20555 | NW_003023600.1 | + | 2480      | 2528      |
| Sma-1-20556 | NW_003026583.1 | + | 86242     | 86290     |
| Sma-1-20557 | NW_003035869.1 | - | 113188    | 113140    |
| Sma-1-20558 | NW_003037789.1 | + | 35567     | 35615     |
| Sma-1-20559 | NW_003037789.1 | - | 39915     | 39867     |
| Sma-1-20560 | NS_000200.1    | + | 303425870 | 303425918 |
| Sma-1-20561 | NS_000200.1    | + | 373805029 | 373805077 |
| Sma-1-20562 | NS_000200.1    | + | 380820187 | 380820235 |
| Sma-1-20563 | NS_000200.1    | - | 380824535 | 380824487 |
| Sma-1-20564 | NS_000200.1    | - | 335297388 | 335297340 |
| Sma-1-20565 | NW_003037837.1 | + | 404728    | 404776    |
| Sma-1-20566 | NS_000200.1    | + | 77210586  | 77210634  |
| Sma-1-20567 | NW_003037882.1 | - | 724751    | 724703    |
| Sma-1-20568 | NW_003037912.1 | + | 837146    | 837194    |
| Sma-1-20569 | NW_003038471.1 | + | 70718     | 70766     |
| Sma-1-20570 | NS_000200.1    | + | 157648721 | 157648769 |
| Sma-1-20571 | NS_000200.1    | + | 331911632 | 331911680 |
| Sma-1-20572 | NS_000200.1    | - | 126016425 | 126016377 |
| Sma-1-20573 | NW_003038259.1 | + | 69570     | 69618     |
| Sma-1-20574 | NS_000200.1    | + | 322930169 | 322930217 |
| Sma-1-20575 | NW_003023144.1 | + | 894       | 942       |
| Sma-1-20576 | NS_000200.1    | + | 368372020 | 368372068 |
| Sma-1-20577 | NW_003037898.1 | + | 191697    | 191745    |
| Sma-1-20578 | NS_000200.1    | + | 144175519 | 144175567 |
| Sma-1-20579 | NW_003037840.1 | - | 473759    | 473711    |
| Sma-1-20580 | NW_003037868.1 | - | 75741     | 75693     |
| Sma-1-20581 | NS_000200.1    | - | 116047453 | 116047405 |
| Sma-1-20582 | NS_000200.1    | - | 81097083  | 81097035  |
| Sma-1-20583 | NW_003037841.1 | + | 1254935   | 1254983   |
| Sma-1-20584 | NS_000200.1    | + | 83866116  | 83866164  |
| Sma-1-20585 | NW_003038007.1 | + | 360991    | 361039    |
| Sma-1-20586 | NS_000200.1    | + | 225609546 | 225609594 |
| Sma-1-20587 | NW_003038056.1 | + | 160532    | 160580    |
| Sma-1-20588 | NS_000200.1    | + | 259138183 | 259138231 |
| Sma-1-20589 | NW_003037841.1 | + | 1741346   | 1741394   |
| Sma-1-20590 | NS_000200.1    | + | 84352527  | 84352575  |
| Sma-1-20591 | NW_003037896.1 | - | 214510    | 214462    |
| Sma-1-20592 | NS_000200.1    | - | 143134933 | 143134885 |
| Sma-1-20593 | NW_003037891.1 | + | 1965322   | 1965370   |
| Sma-1-20594 | NS_000200.1    | + | 139846600 | 139846648 |
| Sma-1-20595 | NW_003038009.1 | - | 250828    | 250780    |
| Sma-1-20596 | NW_003038252.1 | + | 345444    | 345492    |
| Sma-1-20597 | NS_000200.1    | + | 319201032 | 319201080 |
| Sma-1-20598 | NS_000200.1    | - | 226624891 | 226624843 |
| Sma-1-20599 | NW_003038010.1 | - | 7380      | 7332      |
| Sma-1-20600 | NS_000200.1    | - | 226825603 | 226825555 |
| Sma-1-20601 | NW_003038013.1 | - | 108513    | 108465    |
| Sma-1-20602 | NW_003037841.1 | + | 299128    | 299176    |



|             |                |   |           |           |
|-------------|----------------|---|-----------|-----------|
| Sma-1-20603 | NS_000200.1    | + | 82910309  | 82910357  |
| Sma-1-20604 | NS_000200.1    | - | 229498139 | 229498091 |
| Sma-1-20605 | NW_003038083.1 | + | 679672    | 679720    |
| Sma-1-20606 | NS_000200.1    | + | 270923009 | 270923057 |
| Sma-1-20607 | NW_003034722.1 | - | 1244      | 1196      |
| Sma-1-20608 | NW_003037962.1 | + | 38537     | 38585     |
| Sma-1-20609 | NW_003035880.1 | + | 195679    | 195727    |
| Sma-1-20610 | NW_003037790.1 | - | 66501     | 66453     |
| Sma-1-20611 | NW_003026489.1 | + | 68130     | 68178     |
| Sma-1-20612 | NW_003037806.1 | - | 1360025   | 1359977   |
| Sma-1-20613 | NW_003037816.1 | + | 633379    | 633427    |
| Sma-1-20614 | NW_003037830.1 | + | 991736    | 991784    |
| Sma-1-20615 | NW_003037840.1 | - | 752470    | 752422    |
| Sma-1-20616 | NW_003037878.1 | + | 685050    | 685098    |
| Sma-1-20617 | NW_003037881.1 | - | 722122    | 722074    |
| Sma-1-20618 | NW_003037883.1 | - | 13817     | 13769     |
| Sma-1-20619 | NW_003037905.1 | - | 225957    | 225909    |
| Sma-1-20620 | NW_003037914.1 | - | 1710975   | 1710927   |
| Sma-1-20621 | NW_003037972.1 | - | 247377    | 247329    |
| Sma-1-20622 | NW_003038031.1 | + | 302629    | 302677    |
| Sma-1-20623 | NW_003039127.1 | + | 2198005   | 2198053   |
| Sma-1-20624 | NW_003038161.1 | + | 499680    | 499728    |
| Sma-1-20625 | NS_000200.1    | + | 46842251  | 46842299  |
| Sma-1-20626 | NS_000200.1    | + | 68882107  | 68882155  |
| Sma-1-20627 | NS_000200.1    | + | 115275504 | 115275552 |
| Sma-1-20628 | NS_000200.1    | + | 122738528 | 122738576 |
| Sma-1-20629 | NS_000200.1    | + | 196115380 | 196115428 |
| Sma-1-20630 | NS_000200.1    | + | 244580387 | 244580435 |
| Sma-1-20631 | NS_000200.1    | + | 264293350 | 264293398 |
| Sma-1-20632 | NS_000200.1    | + | 297869531 | 297869579 |
| Sma-1-20633 | NS_000200.1    | + | 339436743 | 339436791 |
| Sma-1-20634 | NS_000200.1    | - | 381410673 | 381410625 |
| Sma-1-20635 | NS_000200.1    | - | 328263064 | 328263016 |
| Sma-1-20636 | NS_000200.1    | - | 202723081 | 202723033 |
| Sma-1-20637 | NS_000200.1    | - | 161855225 | 161855177 |
| Sma-1-20638 | NS_000200.1    | - | 149494969 | 149494921 |
| Sma-1-20639 | NS_000200.1    | - | 126077540 | 126077492 |
| Sma-1-20640 | NS_000200.1    | - | 125153913 | 125153865 |
| Sma-1-20641 | NS_000200.1    | - | 81375794  | 81375746  |
| Sma-1-20642 | NS_000200.1    | - | 29555239  | 29555191  |
| Sma-1-20643 | NW_003037849.1 | - | 649015    | 648967    |
| Sma-1-20644 | NW_003038120.1 | + | 55216     | 55264     |
| Sma-1-20645 | NS_000200.1    | + | 278240439 | 278240487 |
| Sma-1-20646 | NS_000200.1    | - | 91625288  | 91625240  |
| Sma-1-20647 | NW_003037891.1 | + | 1549146   | 1549194   |
| Sma-1-20648 | NW_003037891.1 | + | 1553280   | 1553328   |
| Sma-1-20649 | NW_003037891.1 | - | 1548661   | 1548613   |
| Sma-1-20650 | NW_003037904.1 | + | 426104    | 426152    |
| Sma-1-20651 | NS_000200.1    | + | 139430424 | 139430472 |
| Sma-1-20652 | NS_000200.1    | + | 139434558 | 139434606 |
| Sma-1-20653 | NS_000200.1    | + | 149140603 | 149140651 |
| Sma-1-20654 | NS_000200.1    | - | 139429939 | 139429891 |

|             |                |   |           |           |
|-------------|----------------|---|-----------|-----------|
| Sma-1-20655 | NW_003037853.1 | - | 866623    | 866575    |
| Sma-1-20656 | NW_003038032.1 | + | 337794    | 337842    |
| Sma-1-20657 | NS_000200.1    | + | 245496954 | 245497002 |
| Sma-1-20658 | NS_000200.1    | - | 96358674  | 96358626  |
| Sma-1-20659 | NW_003038020.1 | - | 636630    | 636582    |
| Sma-1-20660 | NS_000200.1    | - | 234603974 | 234603926 |
| Sma-1-20661 | NW_003038137.1 | + | 206407    | 206455    |
| Sma-1-20662 | NS_000200.1    | + | 284995303 | 284995351 |
| Sma-1-20663 | NW_003038030.1 | + | 748392    | 748440    |
| Sma-1-20664 | NS_000200.1    | + | 243884259 | 243884307 |
| Sma-1-20665 | NW_003037794.1 | + | 1292742   | 1292790   |
| Sma-1-20666 | NW_003037829.1 | + | 914673    | 914721    |
| Sma-1-20667 | NW_003037847.1 | - | 848314    | 848266    |
| Sma-1-20668 | NW_003037907.1 | - | 254629    | 254581    |
| Sma-1-20669 | NW_003037909.1 | + | 112990    | 113038    |
| Sma-1-20670 | NW_003038033.1 | + | 910635    | 910683    |
| Sma-1-20671 | NW_003038084.1 | + | 183017    | 183065    |
| Sma-1-20672 | NW_003038087.1 | + | 338047    | 338095    |
| Sma-1-20673 | NS_000200.1    | + | 5472337   | 5472385   |
| Sma-1-20674 | NS_000200.1    | + | 66815211  | 66815259  |
| Sma-1-20675 | NS_000200.1    | + | 153654639 | 153654687 |
| Sma-1-20676 | NS_000200.1    | + | 246890637 | 246890685 |
| Sma-1-20677 | NS_000200.1    | + | 271198261 | 271198309 |
| Sma-1-20678 | NS_000200.1    | + | 273366448 | 273366496 |
| Sma-1-20679 | NS_000200.1    | - | 151659118 | 151659070 |
| Sma-1-20680 | NS_000200.1    | - | 89500044  | 89499996  |
| Sma-1-20681 | NW_003037873.1 | - | 683111    | 683063    |
| Sma-1-20682 | NS_000200.1    | - | 119422239 | 119422191 |
| Sma-1-20683 | NW_003035689.1 | - | 17750     | 17702     |
| Sma-1-20684 | NS_000200.1    | - | 333102966 | 333102918 |
| Sma-1-20685 | NW_003038241.1 | + | 151218    | 151266    |
| Sma-1-20686 | NS_000200.1    | + | 314613923 | 314613971 |
| Sma-1-20687 | NW_003037843.1 | + | 416428    | 416476    |
| Sma-1-20688 | NS_000200.1    | + | 86055735  | 86055783  |
| Sma-1-20689 | NW_003037891.1 | + | 1183466   | 1183514   |
| Sma-1-20690 | NS_000200.1    | + | 139064744 | 139064792 |
| Sma-1-20691 | NW_003037852.1 | + | 237215    | 237263    |
| Sma-1-20692 | NS_000200.1    | + | 94629110  | 94629158  |
| Sma-1-20693 | NW_003021574.1 | - | 918       | 870       |
| Sma-1-20694 | NS_000200.1    | - | 348105118 | 348105070 |
| Sma-1-20695 | NW_003038011.1 | - | 278500    | 278452    |
| Sma-1-20696 | NS_000200.1    | - | 227806150 | 227806102 |
| Sma-1-20697 | NW_003037885.1 | - | 702621    | 702573    |
| Sma-1-20698 | NS_000200.1    | - | 128800568 | 128800520 |
| Sma-1-20699 | NW_003030600.1 | - | 958       | 910       |
| Sma-1-20700 | NW_003037791.1 | - | 414004    | 413956    |
| Sma-1-20701 | NW_003037794.1 | + | 1145256   | 1145304   |
| Sma-1-20702 | NW_003037796.1 | + | 1355354   | 1355402   |
| Sma-1-20703 | NW_003037804.1 | - | 1347199   | 1347151   |
| Sma-1-20704 | NW_003037805.1 | - | 1068610   | 1068562   |
| Sma-1-20705 | NW_003037809.1 | + | 1471855   | 1471903   |
| Sma-1-20706 | NW_003037837.1 | + | 23782     | 23830     |

|             |                |   |           |           |
|-------------|----------------|---|-----------|-----------|
| Sma-1-20707 | NW_003037855.1 | - | 298637    | 298589    |
| Sma-1-20708 | NW_003037861.1 | + | 657797    | 657845    |
| Sma-1-20709 | NW_003037910.1 | - | 104369    | 104321    |
| Sma-1-20710 | NW_003037913.1 | + | 78574     | 78622     |
| Sma-1-20711 | NW_003037916.1 | + | 1358643   | 1358691   |
| Sma-1-20712 | NW_003037970.1 | - | 507120    | 507072    |
| Sma-1-20713 | NW_003037978.1 | + | 637497    | 637545    |
| Sma-1-20714 | NW_003037978.1 | + | 637829    | 637877    |
| Sma-1-20715 | NW_003037978.1 | - | 637185    | 637137    |
| Sma-1-20716 | NW_003038018.1 | - | 190932    | 190884    |
| Sma-1-20717 | NW_003038517.1 | + | 289848    | 289896    |
| Sma-1-20718 | NW_003038517.1 | - | 63725     | 63677     |
| Sma-1-20719 | NW_003038056.1 | - | 36579     | 36531     |
| Sma-1-20720 | NW_003038086.1 | - | 203615    | 203567    |
| Sma-1-20721 | NW_003038134.1 | + | 187107    | 187155    |
| Sma-1-20722 | NS_000200.1    | + | 5324851   | 5324899   |
| Sma-1-20723 | NS_000200.1    | + | 9564998   | 9565046   |
| Sma-1-20724 | NS_000200.1    | + | 35136319  | 35136367  |
| Sma-1-20725 | NS_000200.1    | + | 76829640  | 76829688  |
| Sma-1-20726 | NS_000200.1    | + | 105434251 | 105434299 |
| Sma-1-20727 | NS_000200.1    | + | 158642325 | 158642373 |
| Sma-1-20728 | NS_000200.1    | + | 164552054 | 164552102 |
| Sma-1-20729 | NS_000200.1    | + | 209905507 | 209905555 |
| Sma-1-20730 | NS_000200.1    | + | 209905839 | 209905887 |
| Sma-1-20731 | NS_000200.1    | + | 283378224 | 283378272 |
| Sma-1-20732 | NS_000200.1    | + | 341054336 | 341054384 |
| Sma-1-20733 | NS_000200.1    | - | 382119432 | 382119384 |
| Sma-1-20734 | NS_000200.1    | - | 366552920 | 366552872 |
| Sma-1-20735 | NS_000200.1    | - | 340828213 | 340828165 |
| Sma-1-20736 | NS_000200.1    | - | 272452208 | 272452160 |
| Sma-1-20737 | NS_000200.1    | - | 259014230 | 259014182 |
| Sma-1-20738 | NS_000200.1    | - | 232591782 | 232591734 |
| Sma-1-20739 | NS_000200.1    | - | 209905195 | 209905147 |
| Sma-1-20740 | NS_000200.1    | - | 201563310 | 201563262 |
| Sma-1-20741 | NS_000200.1    | - | 154616344 | 154616296 |
| Sma-1-20742 | NS_000200.1    | - | 99163387  | 99163339  |
| Sma-1-20743 | NS_000200.1    | - | 27626454  | 27626406  |
| Sma-1-20744 | NS_000200.1    | - | 26487219  | 26487171  |
| Sma-1-20745 | NW_003038092.1 | - | 21398     | 21350     |
| Sma-1-20746 | NS_000200.1    | - | 273993034 | 273992986 |
| Sma-1-20747 | NW_003038241.1 | - | 123842    | 123794    |
| Sma-1-20748 | NW_003038041.1 | + | 80632     | 80680     |
| Sma-1-20749 | NS_000200.1    | + | 253747914 | 253747962 |
| Sma-1-20750 | NS_000200.1    | - | 314586547 | 314586499 |
| Sma-1-20751 | NW_003037850.1 | + | 1097844   | 1097892   |
| Sma-1-20752 | NS_000200.1    | + | 93083874  | 93083922  |
| Sma-1-20753 | NW_003038059.1 | - | 77701     | 77653     |
| Sma-1-20754 | NS_000200.1    | - | 260319773 | 260319725 |
| Sma-1-20755 | NW_003037995.1 | - | 212798    | 212750    |
| Sma-1-20756 | NS_000200.1    | - | 219902566 | 219902518 |
| Sma-1-20757 | NW_003037894.1 | - | 372658    | 372610    |
| Sma-1-20758 | NS_000200.1    | - | 142269231 | 142269183 |

|             |                |   |           |           |
|-------------|----------------|---|-----------|-----------|
| Sma-1-20759 | NW_003037894.1 | - | 368542    | 368494    |
| Sma-1-20760 | NS_000200.1    | - | 142265115 | 142265067 |
| Sma-1-20761 | NW_003037851.1 | + | 291959    | 292007    |
| Sma-1-20762 | NS_000200.1    | + | 93695269  | 93695317  |
| Sma-1-20763 | NW_003038057.1 | - | 289953    | 289905    |
| Sma-1-20764 | NS_000200.1    | - | 259495769 | 259495721 |
| Sma-1-20765 | NW_003037853.1 | + | 1041946   | 1041994   |
| Sma-1-20766 | NW_003038031.1 | - | 211642    | 211594    |
| Sma-1-20767 | NW_003038157.1 | - | 134308    | 134260    |
| Sma-1-20768 | NS_000200.1    | + | 96533997  | 96534045  |
| Sma-1-20769 | NS_000200.1    | - | 295385228 | 295385180 |
| Sma-1-20770 | NS_000200.1    | - | 244489400 | 244489352 |
| Sma-1-20771 | NW_003037853.1 | - | 1057257   | 1057209   |
| Sma-1-20772 | NW_003038027.1 | - | 211531    | 211483    |
| Sma-1-20773 | NS_000200.1    | - | 240582245 | 240582197 |
| Sma-1-20774 | NS_000200.1    | - | 96549308  | 96549260  |
| Sma-1-20775 | NW_003038243.1 | + | 99094     | 99142     |
| Sma-1-20776 | NS_000200.1    | + | 315037578 | 315037626 |
| Sma-1-20777 | NW_003033991.1 | + | 111       | 159       |
| Sma-1-20778 | NW_003035689.1 | + | 41289     | 41337     |
| Sma-1-20779 | NS_000200.1    | + | 333126505 | 333126553 |
| Sma-1-20780 | NS_000200.1    | + | 363367907 | 363367955 |
| Sma-1-20781 | NW_003037854.1 | - | 1795336   | 1795288   |
| Sma-1-20782 | NS_000200.1    | - | 98699757  | 98699709  |
| Sma-1-20783 | NW_003037857.1 | + | 134307    | 134355    |
| Sma-1-20784 | NW_003038034.1 | - | 349954    | 349906    |
| Sma-1-20785 | NW_003038138.1 | - | 379356    | 379308    |
| Sma-1-20786 | NS_000200.1    | + | 100154664 | 100154712 |
| Sma-1-20787 | NS_000200.1    | - | 285934671 | 285934623 |
| Sma-1-20788 | NS_000200.1    | - | 247291710 | 247291662 |
| Sma-1-20789 | NW_003038138.1 | + | 293383    | 293431    |
| Sma-1-20790 | NS_000200.1    | + | 285848698 | 285848746 |
| Sma-1-20791 | NW_003038237.1 | - | 112849    | 112801    |
| Sma-1-20792 | NW_003039127.1 | - | 2070615   | 2070567   |
| Sma-1-20793 | NS_000200.1    | - | 313552768 | 313552720 |
| Sma-1-20794 | NS_000200.1    | - | 115148114 | 115148066 |
| Sma-1-20795 | NW_003038237.1 | + | 122722    | 122770    |
| Sma-1-20796 | NS_000200.1    | + | 313562641 | 313562689 |
| Sma-1-20797 | NW_003038142.1 | + | 106639    | 106687    |
| Sma-1-20798 | NS_000200.1    | + | 287317075 | 287317123 |
| Sma-1-20799 | NW_003038026.1 | - | 519898    | 519850    |
| Sma-1-20800 | NS_000200.1    | - | 240027659 | 240027611 |
| Sma-1-20801 | NW_003038244.1 | + | 13048     | 13096     |
| Sma-1-20802 | NS_000200.1    | + | 315158253 | 315158301 |
| Sma-1-20803 | NW_003038247.1 | - | 286292    | 286244    |
| Sma-1-20804 | NS_000200.1    | - | 316235020 | 316234972 |
| Sma-1-20805 | NW_003038147.1 | + | 10854     | 10902     |
| Sma-1-20806 | NS_000200.1    | + | 289538597 | 289538645 |
| Sma-1-20807 | NW_003038086.1 | - | 82306     | 82258     |
| Sma-1-20808 | NS_000200.1    | - | 272330899 | 272330851 |
| Sma-1-20809 | NW_003037976.1 | - | 117794    | 117746    |
| Sma-1-20810 | NS_000200.1    | - | 206732109 | 206732061 |

|             |                |   |           |           |
|-------------|----------------|---|-----------|-----------|
| Sma-1-20811 | NW_003037854.1 | + | 396608    | 396655    |
| Sma-1-20812 | NS_000200.1    | + | 97301029  | 97301076  |
| Sma-1-20813 | NW_003037905.1 | - | 997163    | 997115    |
| Sma-1-20814 | NW_003037913.1 | - | 395638    | 395590    |
| Sma-1-20815 | NS_000200.1    | - | 158959389 | 158959341 |
| Sma-1-20816 | NS_000200.1    | - | 150266175 | 150266127 |
| Sma-1-20817 | NW_003038034.1 | - | 216559    | 216511    |
| Sma-1-20818 | NS_000200.1    | - | 247158315 | 247158267 |
| Sma-1-20819 | NW_003037885.1 | - | 904500    | 904452    |
| Sma-1-20820 | NS_000200.1    | - | 129002447 | 129002399 |
| Sma-1-20821 | NW_003037870.1 | - | 278820    | 278772    |
| Sma-1-20822 | NS_000200.1    | - | 117152485 | 117152437 |
| Sma-1-20823 | NW_003038055.1 | + | 162258    | 162306    |
| Sma-1-20824 | NS_000200.1    | + | 258861580 | 258861628 |
| Sma-1-20825 | NW_003038210.1 | + | 118486    | 118534    |
| Sma-1-20826 | NW_003038083.1 | - | 623528    | 623480    |
| Sma-1-20827 | NS_000200.1    | + | 305580385 | 305580433 |
| Sma-1-20828 | NS_000200.1    | - | 270866865 | 270866817 |
| Sma-1-20829 | NW_003038035.1 | + | 454418    | 454466    |
| Sma-1-20830 | NS_000200.1    | + | 248315910 | 248315958 |
| Sma-1-20831 | NW_003037881.1 | - | 674520    | 674472    |
| Sma-1-20832 | NS_000200.1    | - | 125106311 | 125106263 |
| Sma-1-20833 | NW_003038258.1 | + | 276980    | 277028    |
| Sma-1-20834 | NS_000200.1    | + | 322815490 | 322815538 |
| Sma-1-20835 | NW_003038146.1 | - | 463400    | 463352    |
| Sma-1-20836 | NS_000200.1    | - | 289444070 | 289444022 |
| Sma-1-20837 | NW_003038077.1 | - | 326376    | 326328    |
| Sma-1-20838 | NS_000200.1    | - | 267098016 | 267097968 |
| Sma-1-20839 | NW_003038065.1 | - | 295106    | 295058    |
| Sma-1-20840 | NW_003038146.1 | + | 131377    | 131425    |
| Sma-1-20841 | NW_003038146.1 | - | 133601    | 133553    |
| Sma-1-20842 | NS_000200.1    | + | 289112047 | 289112095 |
| Sma-1-20843 | NS_000200.1    | - | 289114271 | 289114223 |
| Sma-1-20844 | NS_000200.1    | - | 262446723 | 262446675 |
| Sma-1-20845 | NW_003038037.1 | + | 1288675   | 1288723   |
| Sma-1-20846 | NS_000200.1    | + | 251444084 | 251444132 |
| Sma-1-20847 | NW_003037978.1 | - | 176135    | 176087    |
| Sma-1-20848 | NS_000200.1    | - | 209444145 | 209444097 |
| Sma-1-20849 | NW_003037915.1 | + | 731695    | 731743    |
| Sma-1-20850 | NS_000200.1    | + | 162631681 | 162631729 |
| Sma-1-20851 | NW_003037914.1 | + | 349558    | 349606    |
| Sma-1-20852 | NW_003037915.1 | + | 724420    | 724468    |
| Sma-1-20853 | NS_000200.1    | + | 160493808 | 160493856 |
| Sma-1-20854 | NS_000200.1    | + | 162624406 | 162624454 |
| Sma-1-20855 | NW_003037893.1 | - | 380863    | 380815    |
| Sma-1-20856 | NS_000200.1    | - | 141495173 | 141495125 |
| Sma-1-20857 | NW_003037851.1 | - | 116026    | 115978    |
| Sma-1-20858 | NS_000200.1    | - | 93519336  | 93519288  |
| Sma-1-20859 | NW_003037841.1 | + | 1347872   | 1347920   |
| Sma-1-20860 | NS_000200.1    | + | 83959053  | 83959101  |
| Sma-1-20861 | NW_003037840.1 | + | 417361    | 417409    |
| Sma-1-20862 | NS_000200.1    | + | 81040685  | 81040733  |

|             |                |   |           |           |
|-------------|----------------|---|-----------|-----------|
| Sma-1-20863 | NW_003037794.1 | + | 2038609   | 2038657   |
| Sma-1-20864 | NW_003038517.1 | - | 65745     | 65697     |
| Sma-1-20865 | NS_000200.1    | + | 6218204   | 6218252   |
| Sma-1-20866 | NS_000200.1    | - | 340830233 | 340830185 |
| Sma-1-20867 | NW_003037820.1 | + | 138670    | 138717    |
| Sma-1-20868 | NS_000200.1    | + | 52411652  | 52411699  |
| Sma-1-20869 | NW_003037816.1 | - | 419668    | 419620    |
| Sma-1-20870 | NS_000200.1    | - | 46628540  | 46628492  |
| Sma-1-20871 | NW_003037814.1 | + | 1189665   | 1189713   |
| Sma-1-20872 | NS_000200.1    | + | 44173525  | 44173573  |
| Sma-1-20873 | NW_003037804.1 | + | 1177454   | 1177502   |
| Sma-1-20874 | NS_000200.1    | + | 26317474  | 26317522  |
| Sma-1-20875 | NW_003037793.1 | - | 2442204   | 2442156   |
| Sma-1-20876 | NW_003037800.1 | + | 980342    | 980390    |
| Sma-1-20877 | NW_003037815.1 | - | 514574    | 514526    |
| Sma-1-20878 | NW_003037824.1 | - | 742482    | 742434    |
| Sma-1-20879 | NW_003037834.1 | - | 650708    | 650660    |
| Sma-1-20880 | NW_003037919.1 | - | 245666    | 245618    |
| Sma-1-20881 | NW_003038008.1 | - | 620369    | 620321    |
| Sma-1-20882 | NS_000200.1    | + | 19609702  | 19609750  |
| Sma-1-20883 | NS_000200.1    | - | 226293465 | 226293417 |
| Sma-1-20884 | NS_000200.1    | - | 169103595 | 169103547 |
| Sma-1-20885 | NS_000200.1    | - | 73811194  | 73811146  |
| Sma-1-20886 | NS_000200.1    | - | 57673422  | 57673374  |
| Sma-1-20887 | NS_000200.1    | - | 45777565  | 45777517  |
| Sma-1-20888 | NS_000200.1    | - | 2442204   | 2442156   |
| Sma-1-20889 | NW_003037066.1 | - | 2146      | 2098      |
| Sma-1-20890 | NS_000200.1    | - | 343769374 | 343769326 |
| Sma-1-20891 | NW_003032564.1 | + | 273       | 321       |
| Sma-1-20892 | NW_003032564.1 | + | 1640      | 1688      |
| Sma-1-20893 | NW_003034564.1 | + | 8473      | 8521      |
| Sma-1-20894 | NW_003026617.1 | - | 162330    | 162282    |
| Sma-1-20895 | NW_003020531.1 | + | 5317      | 5365      |
| Sma-1-20896 | NW_003037809.1 | - | 2148953   | 2148905   |
| Sma-1-20897 | NW_003037832.1 | + | 333274    | 333322    |
| Sma-1-20898 | NW_003037837.1 | + | 74883     | 74931     |
| Sma-1-20899 | NW_003037878.1 | + | 407231    | 407279    |
| Sma-1-20900 | NW_003037881.1 | + | 749929    | 749977    |
| Sma-1-20901 | NW_003026511.1 | - | 368826    | 368778    |
| Sma-1-20902 | NW_003038046.1 | + | 162868    | 162916    |
| Sma-1-20903 | NS_000200.1    | + | 71542705  | 71542753  |
| Sma-1-20904 | NS_000200.1    | + | 76880741  | 76880789  |
| Sma-1-20905 | NS_000200.1    | + | 122460709 | 122460757 |
| Sma-1-20906 | NS_000200.1    | + | 125181720 | 125181768 |
| Sma-1-20907 | NS_000200.1    | + | 255236250 | 255236298 |
| Sma-1-20908 | NS_000200.1    | + | 327621120 | 327621168 |
| Sma-1-20909 | NS_000200.1    | + | 350333126 | 350333174 |
| Sma-1-20910 | NS_000200.1    | + | 350334493 | 350334541 |
| Sma-1-20911 | NS_000200.1    | + | 360079094 | 360079142 |
| Sma-1-20912 | NS_000200.1    | - | 319733189 | 319733141 |
| Sma-1-20913 | NS_000200.1    | - | 284751878 | 284751830 |
| Sma-1-20914 | NS_000200.1    | - | 35813417  | 35813369  |

|             |                |   |           |           |
|-------------|----------------|---|-----------|-----------|
| Sma-1-20915 | NW_003031802.1 | + | 528       | 576       |
| Sma-1-20916 | NS_000200.1    | + | 367041715 | 367041763 |
| Sma-1-20917 | NW_003030081.1 | - | 980       | 932       |
| Sma-1-20918 | NW_003037875.1 | - | 262064    | 262016    |
| Sma-1-20919 | NW_003037829.1 | + | 1096961   | 1097009   |
| Sma-1-20920 | NW_003037830.1 | - | 1549968   | 1549920   |
| Sma-1-20921 | NW_003037840.1 | - | 375396    | 375348    |
| Sma-1-20922 | NW_003037848.1 | - | 1044787   | 1044739   |
| Sma-1-20923 | NW_003037890.1 | - | 1623405   | 1623357   |
| Sma-1-20924 | NW_003038026.1 | + | 719835    | 719883    |
| Sma-1-20925 | NW_003038153.1 | - | 487765    | 487717    |
| Sma-1-20926 | NS_000200.1    | + | 66997499  | 66997547  |
| Sma-1-20927 | NS_000200.1    | + | 240227596 | 240227644 |
| Sma-1-20928 | NS_000200.1    | - | 357555948 | 357555900 |
| Sma-1-20929 | NS_000200.1    | - | 293549814 | 293549766 |
| Sma-1-20930 | NS_000200.1    | - | 137306766 | 137306718 |
| Sma-1-20931 | NS_000200.1    | - | 120290733 | 120290685 |
| Sma-1-20932 | NS_000200.1    | - | 90737858  | 90737810  |
| Sma-1-20933 | NS_000200.1    | - | 80998720  | 80998672  |
| Sma-1-20934 | NS_000200.1    | - | 69440339  | 69440291  |
| Sma-1-20935 | NW_003027775.1 | - | 841       | 793       |
| Sma-1-20936 | NW_003037871.1 | - | 200844    | 200796    |
| Sma-1-20937 | NS_000200.1    | - | 365915050 | 365915002 |
| Sma-1-20938 | NS_000200.1    | - | 117648582 | 117648534 |
| Sma-1-20939 | NW_003026955.1 | - | 850       | 802       |
| Sma-1-20940 | NW_003037896.1 | + | 329226    | 329274    |
| Sma-1-20941 | NW_003037980.1 | + | 110381    | 110429    |
| Sma-1-20942 | NW_003038010.1 | - | 549008    | 548960    |
| Sma-1-20943 | NS_000200.1    | + | 143249649 | 143249697 |
| Sma-1-20944 | NS_000200.1    | + | 211071243 | 211071291 |
| Sma-1-20945 | NS_000200.1    | - | 349581786 | 349581738 |
| Sma-1-20946 | NS_000200.1    | - | 227367231 | 227367183 |
| Sma-1-20947 | NW_003026611.1 | - | 103432    | 103384    |
| Sma-1-20948 | NS_000200.1    | - | 310673216 | 310673168 |
| Sma-1-20949 | NW_003026466.1 | + | 103513    | 103561    |
| Sma-1-20950 | NS_000200.1    | + | 215370620 | 215370668 |
| env-90      | AF036747.1     | + | 117       | 160       |
| Sma-1-20951 | NW_003020254.1 | + | 26        | 74        |
| Sma-1-20952 | NW_003020977.1 | + | 1050      | 1098      |
| Sma-1-20953 | NW_003020977.1 | + | 1383      | 1431      |
| Sma-1-20954 | NW_003021866.1 | - | 2992      | 2944      |
| Sma-1-20955 | NW_003021866.1 | - | 2659      | 2611      |
| Sma-1-20956 | NW_003021866.1 | - | 2326      | 2278      |
| Sma-1-20957 | NW_003021866.1 | - | 1993      | 1945      |
| Sma-1-20958 | NW_003022190.1 | + | 663       | 711       |
| Sma-1-20959 | NW_003023045.1 | + | 13731     | 13779     |
| Sma-1-20960 | NW_003023075.1 | + | 3399      | 3447      |
| Sma-1-20961 | NW_003023381.1 | + | 2035      | 2083      |
| Sma-1-20962 | NW_003023795.1 | - | 579       | 531       |
| Sma-1-20963 | NW_003024785.1 | + | 122       | 170       |
| Sma-1-20964 | NW_003024785.1 | + | 455       | 503       |
| Sma-1-20965 | NW_003024945.1 | + | 217       | 265       |

|             |                |   |        |        |
|-------------|----------------|---|--------|--------|
| Sma-1-20966 | NW_003025129.1 | + | 170    | 218    |
| Sma-1-20967 | NW_003025653.1 | + | 470    | 518    |
| Sma-1-20968 | NW_003025832.1 | + | 862    | 910    |
| Sma-1-20969 | NW_003025832.1 | + | 1195   | 1243   |
| Sma-1-20970 | NW_003026477.1 | - | 44055  | 44007  |
| Sma-1-20971 | NW_003026566.1 | - | 3818   | 3770   |
| Sma-1-20972 | NW_003026578.1 | - | 31618  | 31570  |
| Sma-1-20973 | NW_003026583.1 | + | 24294  | 24342  |
| Sma-1-20974 | NW_003026614.1 | - | 5140   | 5092   |
| Sma-1-20975 | NW_003027140.1 | - | 1061   | 1013   |
| Sma-1-20976 | NW_003028110.1 | + | 688    | 736    |
| Sma-1-20977 | NW_003028255.1 | - | 1536   | 1488   |
| Sma-1-20978 | NW_003028567.1 | - | 914    | 866    |
| Sma-1-20979 | NW_003028749.1 | + | 199    | 247    |
| Sma-1-20980 | NW_003028941.1 | + | 224    | 272    |
| Sma-1-20981 | NW_003029209.1 | - | 779    | 731    |
| Sma-1-20982 | NW_003029281.1 | + | 563    | 611    |
| Sma-1-20983 | NW_003029509.1 | + | 236    | 284    |
| Sma-1-20984 | NW_003029645.1 | - | 1239   | 1191   |
| Sma-1-20985 | NW_003029859.1 | - | 1110   | 1062   |
| Sma-1-20986 | NW_003030020.1 | - | 641    | 593    |
| Sma-1-20987 | NW_003030059.1 | - | 705    | 657    |
| Sma-1-20988 | NW_003030181.1 | + | 15     | 63     |
| Sma-1-20989 | NW_003031250.1 | - | 1369   | 1321   |
| Sma-1-20990 | NW_003031848.1 | - | 97     | 49     |
| Sma-1-20991 | NW_003031889.1 | + | 128    | 176    |
| Sma-1-20992 | NW_003032126.1 | - | 7290   | 7242   |
| Sma-1-20993 | NW_003032319.1 | + | 2864   | 2912   |
| Sma-1-20994 | NW_003033836.1 | + | 468    | 516    |
| Sma-1-20995 | NW_003034050.1 | - | 243    | 195    |
| Sma-1-20996 | NW_003034083.1 | + | 10     | 58     |
| Sma-1-20997 | NW_003034267.1 | + | 341    | 389    |
| Sma-1-20998 | NW_003034267.1 | - | 72     | 24     |
| Sma-1-20999 | NW_003034296.1 | + | 766    | 814    |
| Sma-1-21000 | NW_003034327.1 | - | 5211   | 5163   |
| Sma-1-21001 | NW_003034794.1 | - | 916    | 868    |
| Sma-1-21002 | NW_003035328.1 | + | 1062   | 1110   |
| Sma-1-21003 | NW_003035562.1 | - | 841    | 793    |
| Sma-1-21004 | NW_003035779.1 | + | 1866   | 1914   |
| Sma-1-21005 | NW_003036685.1 | + | 299    | 347    |
| Sma-1-21006 | NW_003039132.1 | - | 727    | 679    |
| Sma-1-21007 | NW_003026617.1 | + | 162631 | 162679 |
| Sma-1-21008 | NW_003037165.1 | + | 3012   | 3060   |
| Sma-1-21009 | NW_003037165.1 | - | 4423   | 4375   |
| Sma-1-21010 | NW_003038253.1 | + | 16755  | 16803  |
| Sma-1-21011 | NW_003038262.1 | - | 30991  | 30943  |
| Sma-1-21012 | NW_003037583.1 | + | 7054   | 7102   |
| Sma-1-21013 | NW_003037873.1 | + | 62364  | 62412  |
| Sma-1-21014 | NW_003037873.1 | + | 107750 | 107798 |
| Sma-1-21015 | NW_003037874.1 | + | 229772 | 229820 |
| Sma-1-21016 | NW_003037874.1 | + | 371643 | 371691 |
| Sma-1-21017 | NW_003037875.1 | + | 331234 | 331282 |



|             |                |   |        |        |
|-------------|----------------|---|--------|--------|
| Sma-1-21018 | NW_003035878.1 | + | 88559  | 88607  |
| Sma-1-21019 | NW_003038509.1 | - | 56751  | 56703  |
| Sma-1-21020 | NW_003038337.1 | - | 1654   | 1606   |
| Sma-1-21021 | NW_003037962.1 | + | 73409  | 73457  |
| Sma-1-21022 | NW_003038511.1 | + | 191914 | 191962 |
| Sma-1-21023 | NW_003038512.1 | - | 445776 | 445728 |
| Sma-1-21024 | NW_003026598.1 | - | 41275  | 41227  |
| Sma-1-21025 | NW_003038441.1 | + | 21012  | 21060  |
| Sma-1-21026 | NW_003038514.1 | + | 272467 | 272515 |
| Sma-1-21027 | NW_003038514.1 | - | 104361 | 104313 |
| Sma-1-21028 | NW_003026472.1 | - | 173907 | 173859 |
| Sma-1-21029 | NW_003038366.1 | + | 529    | 577    |
| Sma-1-21030 | NW_003037898.1 | + | 374948 | 374996 |
| Sma-1-21031 | NW_003037898.1 | - | 353924 | 353876 |
| Sma-1-21032 | NW_003026607.1 | + | 94721  | 94769  |
| Sma-1-21033 | NW_003026607.1 | - | 114162 | 114114 |
| Sma-1-21034 | NW_003038370.1 | - | 28480  | 28432  |
| Sma-1-21035 | NW_003038221.1 | + | 48792  | 48840  |
| Sma-1-21036 | NW_003038222.1 | + | 131648 | 131696 |
| Ehi-1-1     | NW_001916244.1 | - | 616    | 568    |
| Sma-1-21037 | NW_003038850.1 | - | 638    | 590    |
| Sma-1-21038 | NW_003038002.1 | - | 310715 | 310667 |
| Sma-1-21039 | NW_003038745.1 | - | 2543   | 2495   |
| Sma-1-21040 | NW_003038004.1 | - | 160588 | 160540 |
| Sma-1-21041 | NW_003038005.1 | - | 428203 | 428155 |
| Sma-1-21042 | NW_003026584.1 | + | 20252  | 20300  |
| Sma-1-21043 | NW_003026618.1 | + | 171931 | 171979 |
| Sma-1-21044 | NW_003037778.1 | + | 32053  | 32101  |
| Sma-1-21045 | NW_003038009.1 | - | 250495 | 250447 |
| Sma-1-21046 | NW_003038470.1 | + | 11195  | 11243  |
| Sma-1-21047 | NW_003032155.1 | + | 104137 | 104185 |
| Sma-1-21048 | NW_003035869.1 | + | 71244  | 71292  |
| Sma-1-21049 | NW_003026460.1 | + | 257026 | 257074 |
| Sma-1-21050 | NW_003026465.1 | + | 361493 | 361541 |
| Sma-1-21051 | NW_003026465.1 | - | 339264 | 339216 |
| Sma-1-21052 | NW_003037985.1 | + | 58583  | 58631  |
| Sma-1-21053 | NW_003038478.1 | + | 9319   | 9367   |
| Sma-1-21054 | NW_003037929.1 | + | 548171 | 548219 |
| Sma-1-21055 | NW_003035690.1 | + | 25927  | 25975  |
| Sma-1-21056 | NW_003038244.1 | - | 171690 | 171642 |
| Sma-1-21057 | NW_003037936.1 | - | 73005  | 72957  |
| Sma-1-21058 | NW_003037580.1 | - | 13439  | 13391  |
| Sma-1-21059 | NW_003037736.1 | - | 2273   | 2225   |
| Sma-1-21060 | NW_003037937.1 | + | 304737 | 304785 |
| Sma-1-21061 | NW_003037937.1 | - | 685296 | 685248 |
| Sma-1-21062 | NW_003026615.1 | + | 121108 | 121156 |
| Sma-1-21063 | NW_003026616.1 | - | 113375 | 113327 |
| Sma-1-21064 | NW_003039130.1 | + | 168235 | 168283 |
| Sma-1-21065 | NW_003039130.1 | - | 112931 | 112883 |
| Sma-1-21066 | NW_003035866.1 | + | 52882  | 52930  |
| Sma-1-21067 | NW_003038070.1 | + | 154668 | 154716 |
| Sma-1-21068 | NW_003038070.1 | - | 370830 | 370782 |

|             |                |   |         |         |
|-------------|----------------|---|---------|---------|
| Sma-1-21069 | NW_003037785.1 | + | 87319   | 87367   |
| Sma-1-21070 | NW_003037785.1 | + | 95484   | 95532   |
| Sma-1-21071 | NW_003026462.1 | - | 582796  | 582748  |
| Sma-1-21072 | NW_003026470.1 | + | 251678  | 251726  |
| Sma-1-21073 | NW_003026470.1 | + | 306001  | 306049  |
| Sma-1-21074 | NW_003026619.1 | + | 83769   | 83817   |
| Sma-1-21075 | NW_003026619.1 | - | 296988  | 296940  |
| Sma-1-21076 | NW_003026619.1 | - | 19964   | 19916   |
| Sma-1-21077 | NW_003035876.1 | + | 32784   | 32832   |
| Sma-1-21078 | NW_003037791.1 | - | 390500  | 390452  |
| Sma-1-21079 | NW_003037792.1 | - | 207170  | 207122  |
| Sma-1-21080 | NW_003037793.1 | + | 2442512 | 2442560 |
| Sma-1-21081 | NW_003037793.1 | + | 2675609 | 2675657 |
| Sma-1-21082 | NW_003037793.1 | - | 3463476 | 3463428 |
| Sma-1-21083 | NW_003037793.1 | - | 2311860 | 2311812 |
| Sma-1-21084 | NW_003037793.1 | - | 2299500 | 2299452 |
| Sma-1-21085 | NW_003037793.1 | - | 711079  | 711031  |
| Sma-1-21086 | NW_003037793.1 | - | 24825   | 24777   |
| Sma-1-21087 | NW_003037794.1 | + | 35052   | 35100   |
| Sma-1-21088 | NW_003037794.1 | + | 1184749 | 1184797 |
| Sma-1-21089 | NW_003037794.1 | - | 1948914 | 1948866 |
| Sma-1-21090 | NW_003037794.1 | - | 1788755 | 1788707 |
| Sma-1-21091 | NW_003037795.1 | + | 639082  | 639130  |
| Sma-1-21092 | NW_003037795.1 | + | 1329850 | 1329898 |
| Sma-1-21093 | NW_003037796.1 | - | 1161550 | 1161502 |
| Sma-1-21094 | NW_003037796.1 | - | 587554  | 587506  |
| Sma-1-21095 | NW_003037796.1 | - | 308551  | 308503  |
| Sma-1-21096 | NW_003037796.1 | - | 59629   | 59581   |
| Sma-1-21097 | NW_003037797.1 | + | 2324716 | 2324764 |
| Sma-1-21098 | NW_003037797.1 | + | 2419541 | 2419589 |
| Sma-1-21099 | NW_003037797.1 | - | 1637382 | 1637334 |
| Sma-1-21100 | NW_003037797.1 | - | 1058159 | 1058111 |
| Sma-1-21101 | NW_003037797.1 | - | 652698  | 652650  |
| Sma-1-21102 | NW_003037798.1 | + | 260304  | 260352  |
| Sma-1-21103 | NW_003037798.1 | + | 432224  | 432272  |
| Sma-1-21104 | NW_003037798.1 | + | 2646194 | 2646242 |
| Sma-1-21105 | NW_003037798.1 | - | 2645626 | 2645578 |
| Sma-1-21106 | NW_003037798.1 | - | 1409395 | 1409347 |
| Sma-1-21107 | NW_003037798.1 | - | 18253   | 18205   |
| Sma-1-21108 | NW_003037799.1 | - | 261434  | 261386  |
| Sma-1-21109 | NW_003037800.1 | + | 1530556 | 1530604 |
| Sma-1-21110 | NW_003037800.1 | + | 2066003 | 2066051 |
| Sma-1-21111 | NW_003037800.1 | - | 309252  | 309204  |
| Sma-1-21112 | NW_003037803.1 | + | 133363  | 133411  |
| Sma-1-21113 | NW_003037803.1 | + | 1336477 | 1336525 |
| Sma-1-21114 | NW_003037803.1 | - | 1211820 | 1211772 |
| Sma-1-21115 | NW_003037804.1 | + | 563708  | 563756  |
| Sma-1-21116 | NW_003037804.1 | - | 473845  | 473797  |
| Sma-1-21117 | NW_003037805.1 | - | 1420200 | 1420152 |
| Sma-1-21118 | NW_003037806.1 | - | 1820498 | 1820450 |
| Sma-1-21119 | NW_003037806.1 | - | 1076913 | 1076865 |
| Sma-1-21120 | NW_003037806.1 | - | 412525  | 412477  |

|             |                |   |         |         |
|-------------|----------------|---|---------|---------|
| Sma-1-21121 | NW_003037807.1 | + | 1148191 | 1148239 |
| Sma-1-21122 | NW_003037807.1 | - | 1421272 | 1421224 |
| Sma-1-21123 | NW_003037808.1 | + | 925982  | 926030  |
| Sma-1-21124 | NW_003037809.1 | + | 1051772 | 1051820 |
| Sma-1-21125 | NW_003037809.1 | + | 2543608 | 2543656 |
| Sma-1-21126 | NW_003037809.1 | - | 2151881 | 2151833 |
| Sma-1-21127 | NW_003037810.1 | - | 170700  | 170652  |
| Sma-1-21128 | NW_003037811.1 | - | 878068  | 878020  |
| Sma-1-21129 | NW_003037812.1 | + | 189751  | 189799  |
| Sma-1-21130 | NW_003037812.1 | + | 1240518 | 1240566 |
| Sma-1-21131 | NW_003037812.1 | - | 297528  | 297480  |
| Sma-1-21132 | NW_003037813.1 | + | 642122  | 642170  |
| Sma-1-21133 | NW_003037813.1 | - | 1929839 | 1929791 |
| Sma-1-21134 | NW_003037814.1 | + | 656053  | 656101  |
| Sma-1-21135 | NW_003037814.1 | - | 13105   | 13057   |
| Sma-1-21136 | NW_003037815.1 | + | 149572  | 149620  |
| Sma-1-21137 | NW_003037815.1 | + | 543552  | 543600  |
| Sma-1-21138 | NW_003037815.1 | + | 690587  | 690635  |
| Sma-1-21139 | NW_003037817.1 | + | 506178  | 506226  |
| Sma-1-21140 | NW_003037817.1 | + | 956072  | 956120  |
| Sma-1-21141 | NW_003037817.1 | - | 981862  | 981814  |
| Sma-1-21142 | NW_003037818.1 | + | 692815  | 692863  |
| Sma-1-21143 | NW_003037818.1 | + | 2267424 | 2267472 |
| Sma-1-21144 | NW_003037818.1 | - | 350280  | 350232  |
| Sma-1-21145 | NW_003037819.1 | - | 477012  | 476964  |
| Sma-1-21146 | NW_003037820.1 | - | 516588  | 516540  |
| Sma-1-21147 | NW_003037822.1 | - | 1322042 | 1321994 |
| Sma-1-21148 | NW_003037822.1 | - | 294229  | 294181  |
| Sma-1-21149 | NW_003037822.1 | - | 259652  | 259604  |
| Sma-1-21150 | NW_003037824.1 | - | 614913  | 614865  |
| Sma-1-21151 | NW_003037825.1 | + | 363299  | 363347  |
| Sma-1-21152 | NW_003037825.1 | + | 776740  | 776788  |
| Sma-1-21153 | NW_003037825.1 | + | 1429842 | 1429890 |
| Sma-1-21154 | NW_003037825.1 | - | 1552411 | 1552363 |
| Sma-1-21155 | NW_003037825.1 | - | 445659  | 445611  |
| Sma-1-21156 | NW_003037826.1 | + | 238583  | 238631  |
| Sma-1-21157 | NW_003037826.1 | + | 286984  | 287032  |
| Sma-1-21158 | NW_003037826.1 | + | 526038  | 526086  |
| Sma-1-21159 | NW_003037826.1 | + | 566573  | 566621  |
| Sma-1-21160 | NW_003037826.1 | - | 324098  | 324050  |
| Sma-1-21161 | NW_003037827.1 | + | 447972  | 448020  |
| Sma-1-21162 | NW_003037827.1 | + | 2367505 | 2367553 |
| Sma-1-21163 | NW_003037827.1 | - | 1815589 | 1815541 |
| Sma-1-21164 | NW_003037827.1 | - | 553484  | 553436  |
| Sma-1-21165 | NW_003037827.1 | - | 553151  | 553103  |
| Sma-1-21166 | NW_003037829.1 | + | 96289   | 96337   |
| Sma-1-21167 | NW_003037829.1 | + | 652338  | 652386  |
| Sma-1-21168 | NW_003037830.1 | + | 315866  | 315914  |
| Sma-1-21169 | NW_003037830.1 | + | 1454095 | 1454143 |
| Sma-1-21170 | NW_003037831.1 | - | 1053318 | 1053270 |
| Sma-1-21171 | NW_003037832.1 | + | 332093  | 332141  |
| Sma-1-21172 | NW_003037832.1 | - | 327818  | 327770  |

|             |                |   |         |         |
|-------------|----------------|---|---------|---------|
| Sma-1-21173 | NW_003037834.1 | - | 1112735 | 1112687 |
| Sma-1-21174 | NW_003037836.1 | + | 1159313 | 1159361 |
| Sma-1-21175 | NW_003037838.1 | + | 343478  | 343526  |
| Sma-1-21176 | NW_003037838.1 | + | 690367  | 690415  |
| Sma-1-21177 | NW_003037838.1 | + | 903722  | 903770  |
| Sma-1-21178 | NW_003037839.1 | + | 964976  | 965024  |
| Sma-1-21179 | NW_003037839.1 | + | 986581  | 986629  |
| Sma-1-21180 | NW_003037839.1 | - | 968373  | 968325  |
| Sma-1-21181 | NW_003037839.1 | - | 40459   | 40411   |
| Sma-1-21182 | NW_003037839.1 | - | 40126   | 40078   |
| Sma-1-21183 | NW_003037840.1 | + | 1186949 | 1186997 |
| Sma-1-21184 | NW_003037840.1 | - | 458685  | 458637  |
| Sma-1-21185 | NW_003037846.1 | - | 275438  | 275390  |
| Sma-1-21186 | NW_003037847.1 | + | 413613  | 413661  |
| Sma-1-21187 | NW_003037848.1 | + | 201232  | 201280  |
| Sma-1-21188 | NW_003037848.1 | + | 236966  | 237014  |
| Sma-1-21189 | NW_003037849.1 | + | 834673  | 834721  |
| Sma-1-21190 | NW_003037849.1 | - | 317924  | 317876  |
| Sma-1-21191 | NW_003037849.1 | - | 247094  | 247046  |
| Sma-1-21192 | NW_003037850.1 | + | 1072073 | 1072121 |
| Sma-1-21193 | NW_003037850.1 | - | 193750  | 193702  |
| Sma-1-21194 | NW_003037852.1 | + | 670667  | 670715  |
| Sma-1-21195 | NW_003037852.1 | - | 272533  | 272485  |
| Sma-1-21196 | NW_003037853.1 | + | 152624  | 152672  |
| Sma-1-21197 | NW_003037853.1 | + | 429003  | 429051  |
| Sma-1-21198 | NW_003037853.1 | - | 1047445 | 1047397 |
| Sma-1-21199 | NW_003037853.1 | - | 421070  | 421022  |
| Sma-1-21200 | NW_003037854.1 | + | 1091915 | 1091963 |
| Sma-1-21201 | NW_003037854.1 | - | 1517280 | 1517232 |
| Sma-1-21202 | NW_003037855.1 | + | 157110  | 157158  |
| Sma-1-21203 | NW_003037856.1 | + | 657251  | 657299  |
| Sma-1-21204 | NW_003037859.1 | + | 127841  | 127889  |
| Sma-1-21205 | NW_003037859.1 | + | 200884  | 200932  |
| Sma-1-21206 | NW_003037859.1 | - | 558048  | 558000  |
| Sma-1-21207 | NW_003037860.1 | + | 861525  | 861573  |
| Sma-1-21208 | NW_003037864.1 | + | 1127863 | 1127911 |
| Sma-1-21209 | NW_003037864.1 | - | 1448547 | 1448499 |
| Sma-1-21210 | NW_003037865.1 | + | 590101  | 590149  |
| Sma-1-21211 | NW_003037865.1 | + | 596972  | 597020  |
| Sma-1-21212 | NW_003037865.1 | + | 854248  | 854296  |
| Sma-1-21213 | NW_003037869.1 | + | 156059  | 156107  |
| Sma-1-21214 | NW_003037872.1 | - | 296631  | 296583  |
| Sma-1-21215 | NW_003037872.1 | - | 41884   | 41836   |
| Sma-1-21216 | NW_003037877.1 | + | 896834  | 896882  |
| Sma-1-21217 | NW_003037879.1 | - | 169645  | 169597  |
| Sma-1-21218 | NW_003037879.1 | - | 3263    | 3215    |
| Sma-1-21219 | NW_003037881.1 | - | 74536   | 74488   |
| Sma-1-21220 | NW_003037882.1 | - | 520572  | 520524  |
| Sma-1-21221 | NW_003037884.1 | + | 287327  | 287375  |
| Sma-1-21222 | NW_003037885.1 | - | 625836  | 625788  |
| Sma-1-21223 | NW_003037886.1 | + | 1013707 | 1013755 |
| Sma-1-21224 | NW_003037886.1 | - | 606344  | 606296  |

|             |                |   |         |         |
|-------------|----------------|---|---------|---------|
| Sma-1-21225 | NW_003037887.1 | - | 1092432 | 1092384 |
| Sma-1-21226 | NW_003037889.1 | + | 436446  | 436494  |
| Sma-1-21227 | NW_003037889.1 | + | 466770  | 466818  |
| Sma-1-21228 | NW_003037889.1 | + | 469296  | 469344  |
| Sma-1-21229 | NW_003037889.1 | + | 977962  | 978010  |
| Sma-1-21230 | NW_003037889.1 | - | 1164074 | 1164026 |
| Sma-1-21231 | NW_003037889.1 | - | 483816  | 483768  |
| Sma-1-21232 | NW_003037890.1 | + | 1914685 | 1914733 |
| Sma-1-21233 | NW_003037890.1 | + | 2017176 | 2017224 |
| Sma-1-21234 | NW_003037890.1 | - | 2052355 | 2052307 |
| Sma-1-21235 | NW_003037891.1 | + | 852690  | 852738  |
| Sma-1-21236 | NW_003037891.1 | + | 2024519 | 2024567 |
| Sma-1-21237 | NW_003037891.1 | + | 2301626 | 2301674 |
| Sma-1-21238 | NW_003037891.1 | - | 1949002 | 1948954 |
| Sma-1-21239 | NW_003037893.1 | + | 37147   | 37195   |
| Sma-1-21240 | NW_003037893.1 | + | 83486   | 83534   |
| Sma-1-21241 | NW_003037893.1 | - | 361011  | 360963  |
| Sma-1-21242 | NW_003037895.1 | + | 2558    | 2606    |
| Sma-1-21243 | NW_003037895.1 | + | 355926  | 355974  |
| Sma-1-21244 | NW_003037896.1 | - | 321155  | 321107  |
| Sma-1-21245 | NW_003037900.1 | - | 684820  | 684772  |
| Sma-1-21246 | NW_003037902.1 | + | 780628  | 780676  |
| Sma-1-21247 | NW_003037902.1 | - | 619826  | 619778  |
| Sma-1-21248 | NW_003037904.1 | + | 137746  | 137794  |
| Sma-1-21249 | NW_003037904.1 | - | 314828  | 314780  |
| Sma-1-21250 | NW_003037905.1 | - | 160782  | 160734  |
| Sma-1-21251 | NW_003037905.1 | - | 135322  | 135274  |
| Sma-1-21252 | NW_003037907.1 | - | 335495  | 335447  |
| Sma-1-21253 | NW_003037907.1 | - | 101484  | 101436  |
| Sma-1-21254 | NW_003037907.1 | - | 101151  | 101103  |
| Sma-1-21255 | NW_003037908.1 | + | 257552  | 257600  |
| Sma-1-21256 | NW_003037908.1 | + | 357240  | 357288  |
| Sma-1-21257 | NW_003037909.1 | + | 706915  | 706963  |
| Sma-1-21258 | NW_003037909.1 | - | 29281   | 29233   |
| Sma-1-21259 | NW_003037910.1 | + | 428922  | 428970  |
| Sma-1-21260 | NW_003037910.1 | + | 936577  | 936625  |
| Sma-1-21261 | NW_003037910.1 | + | 936910  | 936958  |
| Sma-1-21262 | NW_003037910.1 | - | 840112  | 840064  |
| Sma-1-21263 | NW_003037911.1 | - | 873180  | 873132  |
| Sma-1-21264 | NW_003037911.1 | - | 872847  | 872799  |
| Sma-1-21265 | NW_003037911.1 | - | 872514  | 872466  |
| Sma-1-21266 | NW_003037913.1 | - | 1353043 | 1352995 |
| Sma-1-21267 | NW_003037913.1 | - | 1295292 | 1295244 |
| Sma-1-21268 | NW_003037914.1 | + | 1694256 | 1694304 |
| Sma-1-21269 | NW_003037914.1 | - | 1717323 | 1717275 |
| Sma-1-21270 | NW_003037914.1 | - | 319939  | 319891  |
| Sma-1-21271 | NW_003037914.1 | - | 285200  | 285152  |
| Sma-1-21272 | NW_003037914.1 | - | 247184  | 247136  |
| Sma-1-21273 | NW_003037915.1 | - | 1249433 | 1249385 |
| Sma-1-21274 | NW_003037915.1 | - | 906220  | 906172  |
| Sma-1-21275 | NW_003037915.1 | - | 397327  | 397279  |
| Sma-1-21276 | NW_003037915.1 | - | 68039   | 67991   |

|             |                |   |         |         |
|-------------|----------------|---|---------|---------|
| Sma-1-21277 | NW_003037916.1 | + | 1221430 | 1221478 |
| Sma-1-21278 | NW_003037916.1 | - | 1522566 | 1522518 |
| Sma-1-21279 | NW_003037916.1 | - | 391791  | 391743  |
| Sma-1-21280 | NW_003037916.1 | - | 281598  | 281550  |
| Sma-1-21281 | NW_003037917.1 | + | 1464900 | 1464948 |
| Sma-1-21282 | NW_003037917.1 | - | 459570  | 459522  |
| Sma-1-21283 | NW_003037918.1 | + | 1049867 | 1049915 |
| Sma-1-21284 | NW_003037918.1 | + | 1760023 | 1760071 |
| Sma-1-21285 | NW_003037922.1 | + | 153912  | 153960  |
| Sma-1-21286 | NW_003037922.1 | - | 147675  | 147627  |
| Sma-1-21287 | NW_003037925.1 | - | 728984  | 728936  |
| Sma-1-21288 | NW_003037925.1 | - | 728651  | 728603  |
| Sma-1-21289 | NW_003037926.1 | + | 159800  | 159848  |
| Sma-1-21290 | NW_003037926.1 | - | 159516  | 159468  |
| Sma-1-21291 | NW_003037930.1 | + | 214553  | 214601  |
| Sma-1-21292 | NW_003037932.1 | - | 381254  | 381206  |
| Sma-1-21293 | NW_003037938.1 | + | 609397  | 609445  |
| Sma-1-21294 | NW_003037939.1 | - | 46601   | 46553   |
| Sma-1-21295 | NW_003037942.1 | + | 91118   | 91166   |
| Sma-1-21296 | NW_003037942.1 | + | 605536  | 605584  |
| Sma-1-21297 | NW_003037942.1 | + | 1129622 | 1129670 |
| Sma-1-21298 | NW_003037945.1 | - | 1449542 | 1449494 |
| Sma-1-21299 | NW_003037945.1 | - | 1219554 | 1219506 |
| Sma-1-21300 | NW_003037945.1 | - | 1114852 | 1114804 |
| Sma-1-21301 | NW_003037946.1 | + | 494215  | 494263  |
| Sma-1-21302 | NW_003037946.1 | + | 835379  | 835427  |
| Sma-1-21303 | NW_003037946.1 | + | 1147325 | 1147373 |
| Sma-1-21304 | NW_003037956.1 | + | 43386   | 43434   |
| Sma-1-21305 | NW_003037958.1 | - | 394888  | 394840  |
| Sma-1-21306 | NW_003037958.1 | - | 297812  | 297764  |
| Sma-1-21307 | NW_003037964.1 | - | 192300  | 192252  |
| Sma-1-21308 | NW_003037964.1 | - | 130779  | 130731  |
| Sma-1-21309 | NW_003037964.1 | - | 85488   | 85440   |
| Sma-1-21310 | NW_003037966.1 | + | 536139  | 536187  |
| Sma-1-21311 | NW_003037967.1 | - | 122964  | 122916  |
| Sma-1-21312 | NW_003037967.1 | - | 62989   | 62941   |
| Sma-1-21313 | NW_003037969.1 | + | 174166  | 174214  |
| Sma-1-21314 | NW_003037971.1 | + | 308417  | 308465  |
| Sma-1-21315 | NW_003037972.1 | + | 132168  | 132216  |
| Sma-1-21316 | NW_003037972.1 | + | 449416  | 449464  |
| Sma-1-21317 | NW_003037972.1 | + | 449749  | 449797  |
| Sma-1-21318 | NW_003037975.1 | + | 15844   | 15892   |
| Sma-1-21319 | NW_003037975.1 | + | 839235  | 839283  |
| Sma-1-21320 | NW_003037975.1 | - | 752586  | 752538  |
| Sma-1-21321 | NW_003037975.1 | - | 733616  | 733568  |
| Sma-1-21322 | NW_003037976.1 | - | 368453  | 368405  |
| Sma-1-21323 | NW_003037976.1 | - | 338970  | 338922  |
| Sma-1-21324 | NW_003037977.1 | - | 701090  | 701042  |
| Sma-1-21325 | NW_003037978.1 | + | 392854  | 392902  |
| Sma-1-21326 | NW_003037979.1 | + | 201589  | 201637  |
| Sma-1-21327 | NW_003037979.1 | - | 338385  | 338337  |
| Sma-1-21328 | NW_003037980.1 | + | 1158834 | 1158882 |

|             |                |   |         |         |
|-------------|----------------|---|---------|---------|
| Sma-1-21329 | NW_003037980.1 | - | 1127844 | 1127796 |
| Sma-1-21330 | NW_003037980.1 | - | 701960  | 701912  |
| Sma-1-21331 | NW_003037981.1 | + | 773642  | 773690  |
| Sma-1-21332 | NW_003037981.1 | - | 773383  | 773335  |
| Sma-1-21333 | NW_003037982.1 | - | 598165  | 598117  |
| Sma-1-21334 | NW_003037990.1 | + | 195433  | 195481  |
| Sma-1-21335 | NW_003037996.1 | + | 547805  | 547853  |
| Sma-1-21336 | NW_003037996.1 | - | 484540  | 484492  |
| Sma-1-21337 | NW_003037997.1 | + | 395832  | 395880  |
| Sma-1-21338 | NW_003037998.1 | - | 291753  | 291705  |
| Sma-1-21339 | NW_003038003.1 | - | 511519  | 511471  |
| Sma-1-21340 | NW_003038008.1 | - | 569887  | 569839  |
| Sma-1-21341 | NW_003038010.1 | + | 109379  | 109427  |
| Sma-1-21342 | NW_003038010.1 | + | 513932  | 513980  |
| Sma-1-21343 | NW_003038011.1 | + | 602102  | 602150  |
| Sma-1-21344 | NW_003038011.1 | - | 740437  | 740389  |
| Sma-1-21345 | NW_003038011.1 | - | 246283  | 246235  |
| Sma-1-21346 | NW_003038012.1 | + | 407138  | 407186  |
| Sma-1-21347 | NW_003038012.1 | - | 511118  | 511070  |
| Sma-1-21348 | NW_003038018.1 | - | 216178  | 216130  |
| Sma-1-21349 | NW_003038021.1 | - | 127773  | 127725  |
| Sma-1-21350 | NW_003038022.1 | - | 514859  | 514811  |
| Sma-1-21351 | NW_003038023.1 | - | 478823  | 478775  |
| Sma-1-21352 | NW_003038026.1 | + | 271684  | 271732  |
| Sma-1-21353 | NW_003038027.1 | - | 804882  | 804834  |
| Sma-1-21354 | NW_003038028.1 | - | 221088  | 221040  |
| Sma-1-21355 | NW_003038029.1 | + | 523056  | 523104  |
| Sma-1-21356 | NW_003038029.1 | + | 675552  | 675600  |
| Sma-1-21357 | NW_003038030.1 | + | 469561  | 469609  |
| Sma-1-21358 | NW_003038031.1 | + | 652367  | 652415  |
| Sma-1-21359 | NW_003038031.1 | + | 686461  | 686509  |
| Sma-1-21360 | NW_003038031.1 | - | 686188  | 686140  |
| Sma-1-21361 | NW_003038031.1 | - | 652029  | 651981  |
| Sma-1-21362 | NW_003038034.1 | - | 563522  | 563474  |
| Sma-1-21363 | NW_003038035.1 | - | 989771  | 989723  |
| Sma-1-21364 | NW_003038035.1 | - | 848868  | 848820  |
| Sma-1-21365 | NW_003038036.1 | - | 401212  | 401164  |
| Sma-1-21366 | NW_003038037.1 | + | 750185  | 750233  |
| Sma-1-21367 | NW_003038037.1 | - | 1542085 | 1542037 |
| Sma-1-21368 | NW_003038037.1 | - | 1271635 | 1271587 |
| Sma-1-21369 | NW_003038037.1 | - | 1156076 | 1156028 |
| Sma-1-21370 | NW_003038037.1 | - | 1064710 | 1064662 |
| Sma-1-21371 | NW_003038038.1 | - | 736982  | 736934  |
| Sma-1-21372 | NW_003038219.1 | + | 121883  | 121931  |
| Sma-1-21373 | NW_003038229.1 | - | 83825   | 83777   |
| Sma-1-21374 | NW_003038233.1 | + | 26531   | 26579   |
| Sma-1-21375 | NW_003038233.1 | + | 208132  | 208180  |
| Sma-1-21376 | NW_003038239.1 | + | 119566  | 119614  |
| Sma-1-21377 | NW_003038239.1 | + | 138410  | 138458  |
| Sma-1-21378 | NW_003038239.1 | - | 144696  | 144648  |
| Sma-1-21379 | NW_003038239.1 | - | 138153  | 138105  |
| Sma-1-21380 | NW_003038246.1 | + | 98129   | 98177   |

|             |                |   |         |         |
|-------------|----------------|---|---------|---------|
| Sma-1-21381 | NW_003038246.1 | - | 97982   | 97934   |
| Sma-1-21382 | NW_003038248.1 | - | 109339  | 109291  |
| Sma-1-21383 | NW_003038251.1 | + | 360193  | 360241  |
| Sma-1-21384 | NW_003038251.1 | + | 390181  | 390229  |
| Sma-1-21385 | NW_003038251.1 | - | 398150  | 398102  |
| Sma-1-21386 | NW_003038251.1 | - | 389988  | 389940  |
| Sma-1-21387 | NW_003038254.1 | + | 214803  | 214851  |
| Sma-1-21388 | NW_003038255.1 | - | 257191  | 257143  |
| Sma-1-21389 | NW_003038259.1 | - | 188165  | 188117  |
| Sma-1-21390 | NW_003038260.1 | + | 54663   | 54711   |
| Sma-1-21391 | NW_003038260.1 | - | 173376  | 173328  |
| Sma-1-21392 | NW_003038261.1 | + | 937592  | 937640  |
| Sma-1-21393 | NW_003038410.1 | - | 23056   | 23008   |
| Sma-1-21394 | NW_003038518.1 | + | 899671  | 899719  |
| Sma-1-21395 | NW_003038518.1 | - | 337262  | 337214  |
| Sma-1-21396 | NW_003039127.1 | + | 911931  | 911979  |
| Sma-1-21397 | NW_003039127.1 | + | 1751477 | 1751525 |
| Sma-1-21398 | NW_003039127.1 | - | 2490539 | 2490491 |
| Sma-1-21399 | NW_003039127.1 | - | 913156  | 913108  |
| Sma-1-21400 | NW_003026474.1 | + | 71035   | 71083   |
| Sma-1-21401 | NW_003026474.1 | - | 69834   | 69786   |
| Sma-1-21402 | NW_003026474.1 | - | 61474   | 61426   |
| Sma-1-21403 | NW_003026482.1 | - | 34263   | 34215   |
| Sma-1-21404 | NW_003026485.1 | - | 141056  | 141008  |
| Sma-1-21405 | NW_003026490.1 | + | 234704  | 234752  |
| Sma-1-21406 | NW_003026506.1 | - | 47933   | 47885   |
| Sma-1-21407 | NW_003026507.1 | + | 328491  | 328539  |
| Sma-1-21408 | NW_003026510.1 | - | 54677   | 54629   |
| Sma-1-21409 | NW_003026514.1 | - | 137625  | 137577  |
| Sma-1-21410 | NW_003026516.1 | + | 307381  | 307429  |
| Sma-1-21411 | NW_003026517.1 | - | 165266  | 165218  |
| Sma-1-21412 | NW_003026575.1 | + | 83174   | 83222   |
| Sma-1-21413 | NW_003038042.1 | - | 8509    | 8461    |
| Sma-1-21414 | NW_003038050.1 | + | 203035  | 203083  |
| Sma-1-21415 | NW_003038052.1 | - | 234229  | 234181  |
| Sma-1-21416 | NW_003038052.1 | - | 213975  | 213927  |
| Sma-1-21417 | NW_003038055.1 | + | 188105  | 188153  |
| Sma-1-21418 | NW_003038057.1 | + | 382970  | 383018  |
| Sma-1-21419 | NW_003038059.1 | - | 223904  | 223856  |
| Sma-1-21420 | NW_003038060.1 | - | 205504  | 205456  |
| Sma-1-21421 | NW_003038062.1 | - | 45787   | 45739   |
| Sma-1-21422 | NW_003038064.1 | + | 192095  | 192143  |
| Sma-1-21423 | NW_003038064.1 | + | 198491  | 198539  |
| Sma-1-21424 | NW_003038065.1 | - | 94107   | 94059   |
| Sma-1-21425 | NW_003038076.1 | - | 391390  | 391342  |
| Sma-1-21426 | NW_003038078.1 | + | 79273   | 79321   |
| Sma-1-21427 | NW_003038078.1 | - | 164754  | 164706  |
| Sma-1-21428 | NW_003038079.1 | + | 149278  | 149326  |
| Sma-1-21429 | NW_003038081.1 | + | 31554   | 31602   |
| Sma-1-21430 | NW_003038081.1 | + | 237647  | 237695  |
| Sma-1-21431 | NW_003038082.1 | + | 189095  | 189143  |
| Sma-1-21432 | NW_003038083.1 | + | 60692   | 60740   |



|             |                |   |          |          |
|-------------|----------------|---|----------|----------|
| Sma-1-21433 | NW_003038083.1 | + | 81281    | 81329    |
| Sma-1-21434 | NW_003038085.1 | - | 558358   | 558310   |
| Sma-1-21435 | NW_003038086.1 | + | 468983   | 469031   |
| Sma-1-21436 | NW_003038086.1 | + | 760099   | 760147   |
| Sma-1-21437 | NW_003038103.1 | + | 7881     | 7929     |
| Sma-1-21438 | NW_003038115.1 | + | 25501    | 25549    |
| Sma-1-21439 | NW_003038118.1 | + | 281698   | 281746   |
| Sma-1-21440 | NW_003038122.1 | + | 131098   | 131146   |
| Sma-1-21441 | NW_003038131.1 | - | 15172    | 15124    |
| Sma-1-21442 | NW_003038132.1 | + | 415737   | 415785   |
| Sma-1-21443 | NW_003038134.1 | + | 17932    | 17980    |
| Sma-1-21444 | NW_003038134.1 | - | 14667    | 14619    |
| Sma-1-21445 | NW_003038136.1 | - | 47588    | 47540    |
| Sma-1-21446 | NW_003038139.1 | + | 215475   | 215523   |
| Sma-1-21447 | NW_003038139.1 | + | 222378   | 222426   |
| Sma-1-21448 | NW_003038142.1 | - | 331099   | 331051   |
| Sma-1-21449 | NW_003038147.1 | + | 59967    | 60015    |
| Sma-1-21450 | NW_003038149.1 | + | 204473   | 204521   |
| Sma-1-21451 | NW_003038150.1 | - | 108602   | 108554   |
| Sma-1-21452 | NW_003038151.1 | + | 271141   | 271189   |
| Sma-1-21453 | NW_003038152.1 | - | 140253   | 140205   |
| Sma-1-21454 | NW_003038152.1 | - | 49754    | 49706    |
| Sma-1-21455 | NW_003038152.1 | - | 45909    | 45861    |
| Sma-1-21456 | NW_003038154.1 | + | 86137    | 86185    |
| Sma-1-21457 | NW_003038156.1 | + | 56820    | 56868    |
| Sma-1-21458 | NW_003038156.1 | - | 270697   | 270649   |
| Sma-1-21459 | NW_003038157.1 | + | 107360   | 107408   |
| Sma-1-21460 | NW_003038157.1 | + | 517460   | 517508   |
| Sma-1-21461 | NW_003038157.1 | - | 201750   | 201702   |
| Sma-1-21462 | NW_003038158.1 | - | 317227   | 317179   |
| Sma-1-21463 | NW_003038159.1 | + | 231338   | 231386   |
| Sma-1-21464 | NW_003038159.1 | - | 231000   | 230952   |
| Sma-1-21465 | NW_003038160.1 | + | 255302   | 255350   |
| Sma-1-21466 | NW_003038160.1 | - | 588344   | 588296   |
| Sma-1-21467 | NW_003038160.1 | - | 585365   | 585317   |
| Sma-1-21468 | NW_003038160.1 | - | 47591    | 47543    |
| Sma-1-21469 | NW_003038177.1 | + | 93433    | 93481    |
| Sma-1-21470 | NW_003038196.1 | + | 22553    | 22601    |
| Sma-1-21471 | NS_000200.1    | + | 2442512  | 2442560  |
| Sma-1-21472 | NS_000200.1    | + | 2675609  | 2675657  |
| Sma-1-21473 | NS_000200.1    | + | 4214647  | 4214695  |
| Sma-1-21474 | NS_000200.1    | + | 5364344  | 5364392  |
| Sma-1-21475 | NS_000200.1    | + | 7029965  | 7030013  |
| Sma-1-21476 | NS_000200.1    | + | 7720733  | 7720781  |
| Sma-1-21477 | NS_000200.1    | + | 12752576 | 12752624 |
| Sma-1-21478 | NS_000200.1    | + | 12847401 | 12847449 |
| Sma-1-21479 | NS_000200.1    | + | 14519462 | 14519510 |
| Sma-1-21480 | NS_000200.1    | + | 14691382 | 14691430 |
| Sma-1-21481 | NS_000200.1    | + | 16905352 | 16905400 |
| Sma-1-21482 | NS_000200.1    | + | 20159916 | 20159964 |
| Sma-1-21483 | NS_000200.1    | + | 20695363 | 20695411 |
| Sma-1-21484 | NS_000200.1    | + | 23633900 | 23633948 |

|             |             |   |           |           |
|-------------|-------------|---|-----------|-----------|
| Sma-1-21485 | NS_000200.1 | + | 24837014  | 24837062  |
| Sma-1-21486 | NS_000200.1 | + | 25703728  | 25703776  |
| Sma-1-21487 | NS_000200.1 | + | 31409707  | 31409755  |
| Sma-1-21488 | NS_000200.1 | + | 32712619  | 32712667  |
| Sma-1-21489 | NS_000200.1 | + | 34716236  | 34716284  |
| Sma-1-21490 | NS_000200.1 | + | 36208072  | 36208120  |
| Sma-1-21491 | NS_000200.1 | + | 39672490  | 39672538  |
| Sma-1-21492 | NS_000200.1 | + | 40723257  | 40723305  |
| Sma-1-21493 | NS_000200.1 | + | 41628985  | 41629033  |
| Sma-1-21494 | NS_000200.1 | + | 43639913  | 43639961  |
| Sma-1-21495 | NS_000200.1 | + | 45412563  | 45412611  |
| Sma-1-21496 | NS_000200.1 | + | 45806543  | 45806591  |
| Sma-1-21497 | NS_000200.1 | + | 45953578  | 45953626  |
| Sma-1-21498 | NS_000200.1 | + | 47888530  | 47888578  |
| Sma-1-21499 | NS_000200.1 | + | 48338424  | 48338472  |
| Sma-1-21500 | NS_000200.1 | + | 49408222  | 49408270  |
| Sma-1-21501 | NS_000200.1 | + | 50982831  | 50982879  |
| Sma-1-21502 | NS_000200.1 | + | 59493081  | 59493129  |
| Sma-1-21503 | NS_000200.1 | + | 59906522  | 59906570  |
| Sma-1-21504 | NS_000200.1 | + | 60559624  | 60559672  |
| Sma-1-21505 | NS_000200.1 | + | 61238099  | 61238147  |
| Sma-1-21506 | NS_000200.1 | + | 61286500  | 61286548  |
| Sma-1-21507 | NS_000200.1 | + | 61525554  | 61525602  |
| Sma-1-21508 | NS_000200.1 | + | 61566089  | 61566137  |
| Sma-1-21509 | NS_000200.1 | + | 63070113  | 63070161  |
| Sma-1-21510 | NS_000200.1 | + | 64989646  | 64989694  |
| Sma-1-21511 | NS_000200.1 | + | 65996827  | 65996875  |
| Sma-1-21512 | NS_000200.1 | + | 66552876  | 66552924  |
| Sma-1-21513 | NS_000200.1 | + | 68206237  | 68206285  |
| Sma-1-21514 | NS_000200.1 | + | 69344466  | 69344514  |
| Sma-1-21515 | NS_000200.1 | + | 71541524  | 71541572  |
| Sma-1-21516 | NS_000200.1 | + | 76716412  | 76716460  |
| Sma-1-21517 | NS_000200.1 | + | 78342041  | 78342089  |
| Sma-1-21518 | NS_000200.1 | + | 78688930  | 78688978  |
| Sma-1-21519 | NS_000200.1 | + | 78902285  | 78902333  |
| Sma-1-21520 | NS_000200.1 | + | 79923126  | 79923174  |
| Sma-1-21521 | NS_000200.1 | + | 79944731  | 79944779  |
| Sma-1-21522 | NS_000200.1 | + | 81810273  | 81810321  |
| Sma-1-21523 | NS_000200.1 | + | 89065343  | 89065391  |
| Sma-1-21524 | NS_000200.1 | + | 89894303  | 89894351  |
| Sma-1-21525 | NS_000200.1 | + | 89930037  | 89930085  |
| Sma-1-21526 | NS_000200.1 | + | 91810946  | 91810994  |
| Sma-1-21527 | NS_000200.1 | + | 93058103  | 93058151  |
| Sma-1-21528 | NS_000200.1 | + | 95062562  | 95062610  |
| Sma-1-21529 | NS_000200.1 | + | 95644675  | 95644723  |
| Sma-1-21530 | NS_000200.1 | + | 95921054  | 95921102  |
| Sma-1-21531 | NS_000200.1 | + | 97996336  | 97996384  |
| Sma-1-21532 | NS_000200.1 | + | 99021860  | 99021908  |
| Sma-1-21533 | NS_000200.1 | + | 100015207 | 100015255 |
| Sma-1-21534 | NS_000200.1 | + | 102806682 | 102806730 |
| Sma-1-21535 | NS_000200.1 | + | 102879725 | 102879773 |
| Sma-1-21536 | NS_000200.1 | + | 104604553 | 104604601 |

|             |             |   |           |           |
|-------------|-------------|---|-----------|-----------|
| Sma-1-21537 | NS_000200.1 | + | 109620437 | 109620485 |
| Sma-1-21538 | NS_000200.1 | + | 111012020 | 111012068 |
| Sma-1-21539 | NS_000200.1 | + | 111018891 | 111018939 |
| Sma-1-21540 | NS_000200.1 | + | 111276167 | 111276215 |
| Sma-1-21541 | NS_000200.1 | + | 113989430 | 113989478 |
| Sma-1-21542 | NS_000200.1 | + | 114828976 | 114829024 |
| Sma-1-21543 | NS_000200.1 | + | 116628404 | 116628452 |
| Sma-1-21544 | NS_000200.1 | + | 118801492 | 118801540 |
| Sma-1-21545 | NS_000200.1 | + | 118846878 | 118846926 |
| Sma-1-21546 | NS_000200.1 | + | 119654722 | 119654770 |
| Sma-1-21547 | NS_000200.1 | + | 119796593 | 119796641 |
| Sma-1-21548 | NS_000200.1 | + | 120359903 | 120359951 |
| Sma-1-21549 | NS_000200.1 | + | 121935396 | 121935444 |
| Sma-1-21550 | NS_000200.1 | + | 127066992 | 127067040 |
| Sma-1-21551 | NS_000200.1 | + | 130269274 | 130269322 |
| Sma-1-21552 | NS_000200.1 | + | 134212936 | 134212984 |
| Sma-1-21553 | NS_000200.1 | + | 134243260 | 134243308 |
| Sma-1-21554 | NS_000200.1 | + | 134245786 | 134245834 |
| Sma-1-21555 | NS_000200.1 | + | 134754452 | 134754500 |
| Sma-1-21556 | NS_000200.1 | + | 137598046 | 137598094 |
| Sma-1-21557 | NS_000200.1 | + | 137700537 | 137700585 |
| Sma-1-21558 | NS_000200.1 | + | 138733968 | 138734016 |
| Sma-1-21559 | NS_000200.1 | + | 139905797 | 139905845 |
| Sma-1-21560 | NS_000200.1 | + | 140182904 | 140182952 |
| Sma-1-21561 | NS_000200.1 | + | 141151457 | 141151505 |
| Sma-1-21562 | NS_000200.1 | + | 141197796 | 141197844 |
| Sma-1-21563 | NS_000200.1 | + | 142448760 | 142448808 |
| Sma-1-21564 | NS_000200.1 | + | 142802128 | 142802176 |
| Sma-1-21565 | NS_000200.1 | + | 144358770 | 144358818 |
| Sma-1-21566 | NS_000200.1 | + | 147535862 | 147535910 |
| Sma-1-21567 | NS_000200.1 | + | 148852245 | 148852293 |
| Sma-1-21568 | NS_000200.1 | + | 152730683 | 152730731 |
| Sma-1-21569 | NS_000200.1 | + | 152830371 | 152830419 |
| Sma-1-21570 | NS_000200.1 | + | 154248564 | 154248612 |
| Sma-1-21571 | NS_000200.1 | + | 154940897 | 154940945 |
| Sma-1-21572 | NS_000200.1 | + | 155448552 | 155448600 |
| Sma-1-21573 | NS_000200.1 | + | 155448885 | 155448933 |
| Sma-1-21574 | NS_000200.1 | + | 161838506 | 161838554 |
| Sma-1-21575 | NS_000200.1 | + | 164414841 | 164414889 |
| Sma-1-21576 | NS_000200.1 | + | 166501704 | 166501752 |
| Sma-1-21577 | NS_000200.1 | + | 167616857 | 167616905 |
| Sma-1-21578 | NS_000200.1 | + | 168327013 | 168327061 |
| Sma-1-21579 | NS_000200.1 | + | 170077909 | 170077957 |
| Sma-1-21580 | NS_000200.1 | + | 170779232 | 170779280 |
| Sma-1-21581 | NS_000200.1 | + | 173328070 | 173328118 |
| Sma-1-21582 | NS_000200.1 | + | 175788949 | 175788997 |
| Sma-1-21583 | NS_000200.1 | + | 176072517 | 176072565 |
| Sma-1-21584 | NS_000200.1 | + | 181504646 | 181504694 |
| Sma-1-21585 | NS_000200.1 | + | 182646510 | 182646558 |
| Sma-1-21586 | NS_000200.1 | + | 185851026 | 185851074 |
| Sma-1-21587 | NS_000200.1 | + | 186365444 | 186365492 |
| Sma-1-21588 | NS_000200.1 | + | 186889530 | 186889578 |

|             |             |   |           |           |
|-------------|-------------|---|-----------|-----------|
| Sma-1-21589 | NS_000200.1 | + | 191188075 | 191188123 |
| Sma-1-21590 | NS_000200.1 | + | 191529239 | 191529287 |
| Sma-1-21591 | NS_000200.1 | + | 191841185 | 191841233 |
| Sma-1-21592 | NS_000200.1 | + | 194099841 | 194099889 |
| Sma-1-21593 | NS_000200.1 | + | 196150252 | 196150300 |
| Sma-1-21594 | NS_000200.1 | + | 199238002 | 199238050 |
| Sma-1-21595 | NS_000200.1 | + | 200780293 | 200780341 |
| Sma-1-21596 | NS_000200.1 | + | 201930467 | 201930515 |
| Sma-1-21597 | NS_000200.1 | + | 202607872 | 202607920 |
| Sma-1-21598 | NS_000200.1 | + | 202925120 | 202925168 |
| Sma-1-21599 | NS_000200.1 | + | 202925453 | 202925501 |
| Sma-1-21600 | NS_000200.1 | + | 205598068 | 205598116 |
| Sma-1-21601 | NS_000200.1 | + | 206421459 | 206421507 |
| Sma-1-21602 | NS_000200.1 | + | 207754087 | 207754135 |
| Sma-1-21603 | NS_000200.1 | + | 209660864 | 209660912 |
| Sma-1-21604 | NS_000200.1 | + | 210262609 | 210262657 |
| Sma-1-21605 | NS_000200.1 | + | 212119696 | 212119744 |
| Sma-1-21606 | NS_000200.1 | + | 213171510 | 213171558 |
| Sma-1-21607 | NS_000200.1 | + | 215185927 | 215185975 |
| Sma-1-21608 | NS_000200.1 | + | 217094192 | 217094240 |
| Sma-1-21609 | NS_000200.1 | + | 219375647 | 219375695 |
| Sma-1-21610 | NS_000200.1 | + | 219429970 | 219430018 |
| Sma-1-21611 | NS_000200.1 | + | 220792681 | 220792729 |
| Sma-1-21612 | NS_000200.1 | + | 221207274 | 221207322 |
| Sma-1-21613 | NS_000200.1 | + | 226927602 | 226927650 |
| Sma-1-21614 | NS_000200.1 | + | 227332155 | 227332203 |
| Sma-1-21615 | NS_000200.1 | + | 228129752 | 228129800 |
| Sma-1-21616 | NS_000200.1 | + | 228731077 | 228731125 |
| Sma-1-21617 | NS_000200.1 | + | 239779445 | 239779493 |
| Sma-1-21618 | NS_000200.1 | + | 242723957 | 242724005 |
| Sma-1-21619 | NS_000200.1 | + | 242876453 | 242876501 |
| Sma-1-21620 | NS_000200.1 | + | 243605428 | 243605476 |
| Sma-1-21621 | NS_000200.1 | + | 244930125 | 244930173 |
| Sma-1-21622 | NS_000200.1 | + | 244964219 | 244964267 |
| Sma-1-21623 | NS_000200.1 | + | 250905594 | 250905642 |
| Sma-1-21624 | NS_000200.1 | + | 253269610 | 253269658 |
| Sma-1-21625 | NS_000200.1 | + | 256477929 | 256477977 |
| Sma-1-21626 | NS_000200.1 | + | 258887427 | 258887475 |
| Sma-1-21627 | NS_000200.1 | + | 259588786 | 259588834 |
| Sma-1-21628 | NS_000200.1 | + | 262028672 | 262028720 |
| Sma-1-21629 | NS_000200.1 | + | 262035068 | 262035116 |
| Sma-1-21630 | NS_000200.1 | + | 264491909 | 264491957 |
| Sma-1-21631 | NS_000200.1 | + | 267285476 | 267285524 |
| Sma-1-21632 | NS_000200.1 | + | 267866420 | 267866468 |
| Sma-1-21633 | NS_000200.1 | + | 268279266 | 268279314 |
| Sma-1-21634 | NS_000200.1 | + | 269193597 | 269193645 |
| Sma-1-21635 | NS_000200.1 | + | 269399690 | 269399738 |
| Sma-1-21636 | NS_000200.1 | + | 269724318 | 269724366 |
| Sma-1-21637 | NS_000200.1 | + | 270304029 | 270304077 |
| Sma-1-21638 | NS_000200.1 | + | 270324618 | 270324666 |
| Sma-1-21639 | NS_000200.1 | + | 272717576 | 272717624 |
| Sma-1-21640 | NS_000200.1 | + | 273008692 | 273008740 |

|             |             |   |           |           |
|-------------|-------------|---|-----------|-----------|
| Sma-1-21641 | NS_000200.1 | + | 274802772 | 274802820 |
| Sma-1-21642 | NS_000200.1 | + | 277080796 | 277080844 |
| Sma-1-21643 | NS_000200.1 | + | 277845825 | 277845873 |
| Sma-1-21644 | NS_000200.1 | + | 278650325 | 278650373 |
| Sma-1-21645 | NS_000200.1 | + | 279988642 | 279988690 |
| Sma-1-21646 | NS_000200.1 | + | 282836207 | 282836255 |
| Sma-1-21647 | NS_000200.1 | + | 283209049 | 283209097 |
| Sma-1-21648 | NS_000200.1 | + | 286255605 | 286255653 |
| Sma-1-21649 | NS_000200.1 | + | 286262508 | 286262556 |
| Sma-1-21650 | NS_000200.1 | + | 289587710 | 289587758 |
| Sma-1-21651 | NS_000200.1 | + | 291233086 | 291233134 |
| Sma-1-21652 | NS_000200.1 | + | 292178384 | 292178432 |
| Sma-1-21653 | NS_000200.1 | + | 293883846 | 293883894 |
| Sma-1-21654 | NS_000200.1 | + | 294788933 | 294788981 |
| Sma-1-21655 | NS_000200.1 | + | 295358280 | 295358328 |
| Sma-1-21656 | NS_000200.1 | + | 295768380 | 295768428 |
| Sma-1-21657 | NS_000200.1 | + | 296619359 | 296619407 |
| Sma-1-21658 | NS_000200.1 | + | 297007233 | 297007281 |
| Sma-1-21659 | NS_000200.1 | + | 299415678 | 299415726 |
| Sma-1-21660 | NS_000200.1 | + | 300985873 | 300985921 |
| Sma-1-21661 | NS_000200.1 | + | 302314840 | 302314888 |
| Sma-1-21662 | NS_000200.1 | + | 303164836 | 303164884 |
| Sma-1-21663 | NS_000200.1 | + | 303363922 | 303363970 |
| Sma-1-21664 | NS_000200.1 | + | 303675000 | 303675048 |
| Sma-1-21665 | NS_000200.1 | + | 308127106 | 308127154 |
| Sma-1-21666 | NS_000200.1 | + | 308302304 | 308302352 |
| Sma-1-21667 | NS_000200.1 | + | 308690056 | 308690104 |
| Sma-1-21668 | NS_000200.1 | + | 308919312 | 308919360 |
| Sma-1-21669 | NS_000200.1 | + | 312609630 | 312609678 |
| Sma-1-21670 | NS_000200.1 | + | 312791231 | 312791279 |
| Sma-1-21671 | NS_000200.1 | + | 313960348 | 313960396 |
| Sma-1-21672 | NS_000200.1 | + | 313979192 | 313979240 |
| Sma-1-21673 | NS_000200.1 | + | 315739257 | 315739305 |
| Sma-1-21674 | NS_000200.1 | + | 317115549 | 317115597 |
| Sma-1-21675 | NS_000200.1 | + | 317842846 | 317842894 |
| Sma-1-21676 | NS_000200.1 | + | 318691965 | 318692013 |
| Sma-1-21677 | NS_000200.1 | + | 318721953 | 318722001 |
| Sma-1-21678 | NS_000200.1 | + | 319334552 | 319334600 |
| Sma-1-21679 | NS_000200.1 | + | 319733490 | 319733538 |
| Sma-1-21680 | NS_000200.1 | + | 320250361 | 320250409 |
| Sma-1-21681 | NS_000200.1 | + | 321926933 | 321926981 |
| Sma-1-21682 | NS_000200.1 | + | 322274513 | 322274561 |
| Sma-1-21683 | NS_000200.1 | + | 323226438 | 323226486 |
| Sma-1-21684 | NS_000200.1 | + | 324551243 | 324551291 |
| Sma-1-21685 | NS_000200.1 | + | 326704752 | 326704800 |
| Sma-1-21686 | NS_000200.1 | + | 326771287 | 326771335 |
| Sma-1-21687 | NS_000200.1 | + | 326907445 | 326907493 |
| Sma-1-21688 | NS_000200.1 | + | 329768384 | 329768432 |
| Sma-1-21689 | NS_000200.1 | + | 331835929 | 331835977 |
| Sma-1-21690 | NS_000200.1 | + | 332584353 | 332584401 |
| Sma-1-21691 | NS_000200.1 | + | 333164559 | 333164607 |
| Sma-1-21692 | NS_000200.1 | + | 334146692 | 334146740 |

|             |             |   |           |           |
|-------------|-------------|---|-----------|-----------|
| Sma-1-21693 | NS_000200.1 | + | 335255444 | 335255492 |
| Sma-1-21694 | NS_000200.1 | + | 336864284 | 336864332 |
| Sma-1-21695 | NS_000200.1 | + | 337298369 | 337298417 |
| Sma-1-21696 | NS_000200.1 | + | 338537126 | 338537174 |
| Sma-1-21697 | NS_000200.1 | + | 339897006 | 339897054 |
| Sma-1-21698 | NS_000200.1 | + | 342536504 | 342536552 |
| Sma-1-21699 | NS_000200.1 | + | 345887810 | 345887858 |
| Sma-1-21700 | NS_000200.1 | + | 351531880 | 351531928 |
| Sma-1-21701 | NS_000200.1 | + | 352260068 | 352260116 |
| Sma-1-21702 | NS_000200.1 | + | 352260401 | 352260449 |
| Sma-1-21703 | NS_000200.1 | + | 355762363 | 355762411 |
| Sma-1-21704 | NS_000200.1 | + | 356307632 | 356307680 |
| Sma-1-21705 | NS_000200.1 | + | 356605311 | 356605359 |
| Sma-1-21706 | NS_000200.1 | + | 356605644 | 356605692 |
| Sma-1-21707 | NS_000200.1 | + | 357213368 | 357213416 |
| Sma-1-21708 | NS_000200.1 | + | 359233551 | 359233599 |
| Sma-1-21709 | NS_000200.1 | + | 360897977 | 360898025 |
| Sma-1-21710 | NS_000200.1 | + | 361222676 | 361222724 |
| Sma-1-21711 | NS_000200.1 | + | 362187152 | 362187200 |
| Sma-1-21712 | NS_000200.1 | + | 362276646 | 362276694 |
| Sma-1-21713 | NS_000200.1 | + | 362389493 | 362389541 |
| Sma-1-21714 | NS_000200.1 | + | 363686005 | 363686053 |
| Sma-1-21715 | NS_000200.1 | + | 364072257 | 364072305 |
| Sma-1-21716 | NS_000200.1 | + | 367214972 | 367215020 |
| Sma-1-21717 | NS_000200.1 | + | 367277226 | 367277274 |
| Sma-1-21718 | NS_000200.1 | + | 367718093 | 367718141 |
| Sma-1-21719 | NS_000200.1 | + | 367718426 | 367718474 |
| Sma-1-21720 | NS_000200.1 | + | 369372637 | 369372685 |
| Sma-1-21721 | NS_000200.1 | + | 369867859 | 369867907 |
| Sma-1-21722 | NS_000200.1 | + | 371288067 | 371288115 |
| Sma-1-21723 | NS_000200.1 | + | 372358940 | 372358988 |
| Sma-1-21724 | NS_000200.1 | + | 372458745 | 372458793 |
| Sma-1-21725 | NS_000200.1 | + | 372699541 | 372699589 |
| Sma-1-21726 | NS_000200.1 | + | 373208495 | 373208543 |
| Sma-1-21727 | NS_000200.1 | + | 374939628 | 374939676 |
| Sma-1-21728 | NS_000200.1 | + | 378944561 | 378944609 |
| Sma-1-21729 | NS_000200.1 | + | 379655228 | 379655276 |
| Sma-1-21730 | NS_000200.1 | + | 379985986 | 379986034 |
| Sma-1-21731 | NS_000200.1 | + | 379994151 | 379994199 |
| Sma-1-21732 | NS_000200.1 | - | 382644514 | 382644466 |
| Sma-1-21733 | NS_000200.1 | - | 382095928 | 382095880 |
| Sma-1-21734 | NS_000200.1 | - | 378189045 | 378188997 |
| Sma-1-21735 | NS_000200.1 | - | 376682645 | 376682597 |
| Sma-1-21736 | NS_000200.1 | - | 376507188 | 376507140 |
| Sma-1-21737 | NS_000200.1 | - | 374651635 | 374651587 |
| Sma-1-21738 | NS_000200.1 | - | 374403457 | 374403409 |
| Sma-1-21739 | NS_000200.1 | - | 372316653 | 372316605 |
| Sma-1-21740 | NS_000200.1 | - | 368818408 | 368818360 |
| Sma-1-21741 | NS_000200.1 | - | 367140947 | 367140899 |
| Sma-1-21742 | NS_000200.1 | - | 366339630 | 366339582 |
| Sma-1-21743 | NS_000200.1 | - | 363609433 | 363609385 |
| Sma-1-21744 | NS_000200.1 | - | 362390904 | 362390856 |

|             |             |   |            |            |
|-------------|-------------|---|------------|------------|
| Sma-1-21745 | NS_000200.1 | - | 357507637  | 357507589  |
| Sma-1-21746 | NS_000200.1 | - | 357449648  | 357449600  |
| Sma-1-21747 | NS_000200.1 | - | 357086503  | 357086455  |
| Sma-1-21748 | NS_000200.1 | - | 353145494  | 353145446  |
| Sma-1-21749 | NS_000200.1 | - | 353022048  | 353022000  |
| Sma-1-21750 | NS_000200.1 | - | 351999094  | 351999046  |
| Sma-1-21751 | NS_000200.1 | - | 351998761  | 351998713  |
| Sma-1-21752 | NS_000200.1 | - | 351998428  | 351998380  |
| Sma-1-21753 | NS_000200.1 | - | 351998095  | 351998047  |
| Sma-1-21754 | NS_000200.1 | - | 349317818  | 349317770  |
| Sma-1-21755 | NS_000200.1 | - | 347003592  | 347003544  |
| Sma-1-21756 | NS_000200.1 | - | 345686322  | 345686274  |
| Sma-1-21757 | NS_000200.1 | - | 345609133  | 345609085  |
| Sma-1-21758 | NS_000200.1 | - | 341974095  | 341974047  |
| Sma-1-21759 | NS_000200.1 | - | 339728900  | 339728852  |
| Sma-1-21760 | NS_000200.1 | - | 339002473  | 339002425  |
| Sma-1-21761 | NS_000200.1 | - | 337689203  | 337689155  |
| Sma-1-21762 | NS_000200.1 | - | 328489634  | 328489586  |
| Sma-1-21763 | NS_000200.1 | - | 328434663  | 328434615  |
| Sma-1-21764 | NS_000200.1 | - | 327171796  | 327171748  |
| Sma-1-21765 | NS_000200.1 | - | 326855892  | 326855844  |
| Sma-1-21766 | NS_000200.1 | - | 326704483  | 326704435  |
| Sma-1-21767 | NS_000200.1 | - | 326341708  | 326341660  |
| Sma-1-21768 | NS_000200.1 | - | 324709592  | 324709544  |
| Sma-1-21769 | NS_000200.1 | - | 323345151  | 323345103  |
| Sma-1-21770 | NS_000200.1 | - | 323048764  | 323048716  |
| Sma-1-21771 | NS_000200.1 | - | 322487732  | 322487684  |
| Sma-1-21772 | NS_000200.1 | - | 322210708  | 322210660  |
| Sma-1-21773 | NS_000200.1 | - | 320646336  | 320646288  |
| Sma-1-21774 | NS_000200.1 | - | 318729922  | 318729874  |
| Sma-1-21775 | NS_000200.1 | - | 318721760  | 318721712  |
| Sma-1-21776 | NS_000200.1 | - | 317787542  | 317787494  |
| Sma-1-21777 | NS_000200.1 | - | 317469974  | 317469926  |
| Sma-1-21778 | NS_000200.1 | - | 316420606  | 316420558  |
| Sma-1-21779 | NS_000200.1 | - | 315901871  | 315901823  |
| Sma-1-21780 | NS_000200.1 | - | 315739110  | 315739062  |
| Sma-1-21781 | NS_000200.1 | - | 315316895  | 315316847  |
| Sma-1-21782 | NS_000200.1 | - | 313985478  | 313985430  |
| Sma-1-21783 | NS_000200.1 | - | 313978935  | 313978887  |
| Sma-1-21784 | NS_000200.1 | - | 311201047  | 311200999  |
| Sma-1-21785 | NS_000200.1 | - | 308146547  | 308146499  |
| Sma-1-21786 | NS_000200.1 | - | 305811491  | 305811443  |
| Sma-1-21787 | NS_000200.1 | - | 302749289  | 302749241  |
| Sma-1-21788 | NS_000200.1 | - | 301255422  | 301255374  |
| Sma-1-21789 | NS_000200.1 | - | 299771275  | 299771227  |
| Sma-1-21790 | NS_000200.1 | - | 297340275  | 297340227  |
| Sma-1-21791 | NS_000200.1 | - | 297337296  | 297337248  |
| Sma-1-21792 | NS_000200.1 | - | 296799522  | 296799474  |
| Sma-1-21793 | NS_000200.1 | - | 2966619021 | 2966618973 |
| Sma-1-21794 | NS_000200.1 | - | 296200395  | 296200347  |
| Sma-1-21795 | NS_000200.1 | - | 295452670  | 295452622  |
| Sma-1-21796 | NS_000200.1 | - | 295002810  | 295002762  |

|             |             |   |           |           |
|-------------|-------------|---|-----------|-----------|
| Sma-1-21797 | NS_000200.1 | - | 292745977 | 292745929 |
| Sma-1-21798 | NS_000200.1 | - | 292655478 | 292655430 |
| Sma-1-21799 | NS_000200.1 | - | 292651633 | 292651585 |
| Sma-1-21800 | NS_000200.1 | - | 291587340 | 291587292 |
| Sma-1-21801 | NS_000200.1 | - | 288596312 | 288596264 |
| Sma-1-21802 | NS_000200.1 | - | 287541535 | 287541487 |
| Sma-1-21803 | NS_000200.1 | - | 284169657 | 284169609 |
| Sma-1-21804 | NS_000200.1 | - | 283494858 | 283494810 |
| Sma-1-21805 | NS_000200.1 | - | 283205784 | 283205736 |
| Sma-1-21806 | NS_000200.1 | - | 281977016 | 281976968 |
| Sma-1-21807 | NS_000200.1 | - | 279608998 | 279608950 |
| Sma-1-21808 | NS_000200.1 | - | 272248451 | 272248403 |
| Sma-1-21809 | NS_000200.1 | - | 267370957 | 267370909 |
| Sma-1-21810 | NS_000200.1 | - | 266608564 | 266608516 |
| Sma-1-21811 | NS_000200.1 | - | 264708071 | 264708023 |
| Sma-1-21812 | NS_000200.1 | - | 262245724 | 262245676 |
| Sma-1-21813 | NS_000200.1 | - | 261397773 | 261397725 |
| Sma-1-21814 | NS_000200.1 | - | 260770629 | 260770581 |
| Sma-1-21815 | NS_000200.1 | - | 260465976 | 260465928 |
| Sma-1-21816 | NS_000200.1 | - | 258495961 | 258495913 |
| Sma-1-21817 | NS_000200.1 | - | 257281705 | 257281657 |
| Sma-1-21818 | NS_000200.1 | - | 257261451 | 257261403 |
| Sma-1-21819 | NS_000200.1 | - | 255822009 | 255821961 |
| Sma-1-21820 | NS_000200.1 | - | 253954108 | 253954060 |
| Sma-1-21821 | NS_000200.1 | - | 253921464 | 253921416 |
| Sma-1-21822 | NS_000200.1 | - | 253268409 | 253268361 |
| Sma-1-21823 | NS_000200.1 | - | 253260049 | 253260001 |
| Sma-1-21824 | NS_000200.1 | - | 252640375 | 252640327 |
| Sma-1-21825 | NS_000200.1 | - | 251697494 | 251697446 |
| Sma-1-21826 | NS_000200.1 | - | 251427044 | 251426996 |
| Sma-1-21827 | NS_000200.1 | - | 251311485 | 251311437 |
| Sma-1-21828 | NS_000200.1 | - | 251220119 | 251220071 |
| Sma-1-21829 | NS_000200.1 | - | 249335064 | 249335016 |
| Sma-1-21830 | NS_000200.1 | - | 248851263 | 248851215 |
| Sma-1-21831 | NS_000200.1 | - | 248710360 | 248710312 |
| Sma-1-21832 | NS_000200.1 | - | 247505278 | 247505230 |
| Sma-1-21833 | NS_000200.1 | - | 244963946 | 244963898 |
| Sma-1-21834 | NS_000200.1 | - | 244929787 | 244929739 |
| Sma-1-21835 | NS_000200.1 | - | 241528662 | 241528614 |
| Sma-1-21836 | NS_000200.1 | - | 241175596 | 241175548 |
| Sma-1-21837 | NS_000200.1 | - | 237639114 | 237639066 |
| Sma-1-21838 | NS_000200.1 | - | 236585899 | 236585851 |
| Sma-1-21839 | NS_000200.1 | - | 236195701 | 236195653 |
| Sma-1-21840 | NS_000200.1 | - | 234956348 | 234956300 |
| Sma-1-21841 | NS_000200.1 | - | 232617028 | 232616980 |
| Sma-1-21842 | NS_000200.1 | - | 228835057 | 228835009 |
| Sma-1-21843 | NS_000200.1 | - | 228268087 | 228268039 |
| Sma-1-21844 | NS_000200.1 | - | 227773933 | 227773885 |
| Sma-1-21845 | NS_000200.1 | - | 226624558 | 226624510 |
| Sma-1-21846 | NS_000200.1 | - | 226242983 | 226242935 |
| Sma-1-21847 | NS_000200.1 | - | 224834157 | 224834109 |
| Sma-1-21848 | NS_000200.1 | - | 224328456 | 224328408 |



|             |             |   |           |           |
|-------------|-------------|---|-----------|-----------|
| Sma-1-21849 | NS_000200.1 | - | 224010801 | 224010753 |
| Sma-1-21850 | NS_000200.1 | - | 223430924 | 223430876 |
| Sma-1-21851 | NS_000200.1 | - | 221578349 | 221578301 |
| Sma-1-21852 | NS_000200.1 | - | 220729416 | 220729368 |
| Sma-1-21853 | NS_000200.1 | - | 214257360 | 214257312 |
| Sma-1-21854 | NS_000200.1 | - | 213171251 | 213171203 |
| Sma-1-21855 | NS_000200.1 | - | 212088706 | 212088658 |
| Sma-1-21856 | NS_000200.1 | - | 211662822 | 211662774 |
| Sma-1-21857 | NS_000200.1 | - | 210399405 | 210399357 |
| Sma-1-21858 | NS_000200.1 | - | 208987110 | 208987062 |
| Sma-1-21859 | NS_000200.1 | - | 207731858 | 207731810 |
| Sma-1-21860 | NS_000200.1 | - | 206982768 | 206982720 |
| Sma-1-21861 | NS_000200.1 | - | 206953285 | 206953237 |
| Sma-1-21862 | NS_000200.1 | - | 206334810 | 206334762 |
| Sma-1-21863 | NS_000200.1 | - | 206315840 | 206315792 |
| Sma-1-21864 | NS_000200.1 | - | 199362935 | 199362887 |
| Sma-1-21865 | NS_000200.1 | - | 199302960 | 199302912 |
| Sma-1-21866 | NS_000200.1 | - | 197793822 | 197793774 |
| Sma-1-21867 | NS_000200.1 | - | 197732301 | 197732253 |
| Sma-1-21868 | NS_000200.1 | - | 197687010 | 197686962 |
| Sma-1-21869 | NS_000200.1 | - | 197250299 | 197250251 |
| Sma-1-21870 | NS_000200.1 | - | 195059072 | 195059024 |
| Sma-1-21871 | NS_000200.1 | - | 194961996 | 194961948 |
| Sma-1-21872 | NS_000200.1 | - | 190551506 | 190551458 |
| Sma-1-21873 | NS_000200.1 | - | 190321518 | 190321470 |
| Sma-1-21874 | NS_000200.1 | - | 190216816 | 190216768 |
| Sma-1-21875 | NS_000200.1 | - | 182916355 | 182916307 |
| Sma-1-21876 | NS_000200.1 | - | 181885205 | 181885157 |
| Sma-1-21877 | NS_000200.1 | - | 180512734 | 180512686 |
| Sma-1-21878 | NS_000200.1 | - | 177914450 | 177914402 |
| Sma-1-21879 | NS_000200.1 | - | 173327786 | 173327738 |
| Sma-1-21880 | NS_000200.1 | - | 173130987 | 173130939 |
| Sma-1-21881 | NS_000200.1 | - | 173130654 | 173130606 |
| Sma-1-21882 | NS_000200.1 | - | 170071672 | 170071624 |
| Sma-1-21883 | NS_000200.1 | - | 165496374 | 165496326 |
| Sma-1-21884 | NS_000200.1 | - | 164715977 | 164715929 |
| Sma-1-21885 | NS_000200.1 | - | 163585202 | 163585154 |
| Sma-1-21886 | NS_000200.1 | - | 163475009 | 163474961 |
| Sma-1-21887 | NS_000200.1 | - | 163149419 | 163149371 |
| Sma-1-21888 | NS_000200.1 | - | 162806206 | 162806158 |
| Sma-1-21889 | NS_000200.1 | - | 162297313 | 162297265 |
| Sma-1-21890 | NS_000200.1 | - | 161968025 | 161967977 |
| Sma-1-21891 | NS_000200.1 | - | 161861573 | 161861525 |
| Sma-1-21892 | NS_000200.1 | - | 160464189 | 160464141 |
| Sma-1-21893 | NS_000200.1 | - | 160429450 | 160429402 |
| Sma-1-21894 | NS_000200.1 | - | 160391434 | 160391386 |
| Sma-1-21895 | NS_000200.1 | - | 159916794 | 159916746 |
| Sma-1-21896 | NS_000200.1 | - | 159859043 | 159858995 |
| Sma-1-21897 | NS_000200.1 | - | 156660533 | 156660485 |
| Sma-1-21898 | NS_000200.1 | - | 156660200 | 156660152 |
| Sma-1-21899 | NS_000200.1 | - | 156659867 | 156659819 |
| Sma-1-21900 | NS_000200.1 | - | 155352087 | 155352039 |

|             |             |   |           |           |
|-------------|-------------|---|-----------|-----------|
| Sma-1-21901 | NS_000200.1 | - | 153570930 | 153570882 |
| Sma-1-21902 | NS_000200.1 | - | 151739984 | 151739936 |
| Sma-1-21903 | NS_000200.1 | - | 151505973 | 151505925 |
| Sma-1-21904 | NS_000200.1 | - | 151505640 | 151505592 |
| Sma-1-21905 | NS_000200.1 | - | 149429794 | 149429746 |
| Sma-1-21906 | NS_000200.1 | - | 149404334 | 149404286 |
| Sma-1-21907 | NS_000200.1 | - | 149029327 | 149029279 |
| Sma-1-21908 | NS_000200.1 | - | 147375060 | 147375012 |
| Sma-1-21909 | NS_000200.1 | - | 145813686 | 145813638 |
| Sma-1-21910 | NS_000200.1 | - | 144337746 | 144337698 |
| Sma-1-21911 | NS_000200.1 | - | 143241578 | 143241530 |
| Sma-1-21912 | NS_000200.1 | - | 141475321 | 141475273 |
| Sma-1-21913 | NS_000200.1 | - | 139830280 | 139830232 |
| Sma-1-21914 | NS_000200.1 | - | 137735716 | 137735668 |
| Sma-1-21915 | NS_000200.1 | - | 134940564 | 134940516 |
| Sma-1-21916 | NS_000200.1 | - | 134260306 | 134260258 |
| Sma-1-21917 | NS_000200.1 | - | 131556410 | 131556362 |
| Sma-1-21918 | NS_000200.1 | - | 129861911 | 129861863 |
| Sma-1-21919 | NS_000200.1 | - | 128723783 | 128723735 |
| Sma-1-21920 | NS_000200.1 | - | 125812246 | 125812198 |
| Sma-1-21921 | NS_000200.1 | - | 124506327 | 124506279 |
| Sma-1-21922 | NS_000200.1 | - | 123171901 | 123171853 |
| Sma-1-21923 | NS_000200.1 | - | 123005519 | 123005471 |
| Sma-1-21924 | NS_000200.1 | - | 118253637 | 118253589 |
| Sma-1-21925 | NS_000200.1 | - | 117998890 | 117998842 |
| Sma-1-21926 | NS_000200.1 | - | 115568038 | 115567990 |
| Sma-1-21927 | NS_000200.1 | - | 113990655 | 113990607 |
| Sma-1-21928 | NS_000200.1 | - | 109941121 | 109941073 |
| Sma-1-21929 | NS_000200.1 | - | 103236889 | 103236841 |
| Sma-1-21930 | NS_000200.1 | - | 98421701  | 98421653  |
| Sma-1-21931 | NS_000200.1 | - | 96539496  | 96539448  |
| Sma-1-21932 | NS_000200.1 | - | 95913121  | 95913073  |
| Sma-1-21933 | NS_000200.1 | - | 94664428  | 94664380  |
| Sma-1-21934 | NS_000200.1 | - | 92179780  | 92179732  |
| Sma-1-21935 | NS_000200.1 | - | 91294197  | 91294149  |
| Sma-1-21936 | NS_000200.1 | - | 91223367  | 91223319  |
| Sma-1-21937 | NS_000200.1 | - | 87910008  | 87909960  |
| Sma-1-21938 | NS_000200.1 | - | 81082009  | 81081961  |
| Sma-1-21939 | NS_000200.1 | - | 79926523  | 79926475  |
| Sma-1-21940 | NS_000200.1 | - | 78998609  | 78998561  |
| Sma-1-21941 | NS_000200.1 | - | 78998276  | 78998228  |
| Sma-1-21942 | NS_000200.1 | - | 74273221  | 74273173  |
| Sma-1-21943 | NS_000200.1 | - | 71537249  | 71537201  |
| Sma-1-21944 | NS_000200.1 | - | 70502620  | 70502572  |
| Sma-1-21945 | NS_000200.1 | - | 64437730  | 64437682  |
| Sma-1-21946 | NS_000200.1 | - | 63175625  | 63175577  |
| Sma-1-21947 | NS_000200.1 | - | 63175292  | 63175244  |
| Sma-1-21948 | NS_000200.1 | - | 61323614  | 61323566  |
| Sma-1-21949 | NS_000200.1 | - | 60682193  | 60682145  |
| Sma-1-21950 | NS_000200.1 | - | 59575441  | 59575393  |
| Sma-1-21951 | NS_000200.1 | - | 57545853  | 57545805  |
| Sma-1-21952 | NS_000200.1 | - | 55630048  | 55630000  |

|             |                |   |          |          |
|-------------|----------------|---|----------|----------|
| Sma-1-21953 | NS_000200.1    | - | 54602235 | 54602187 |
| Sma-1-21954 | NS_000200.1    | - | 54567658 | 54567610 |
| Sma-1-21955 | NS_000200.1    | - | 52789570 | 52789522 |
| Sma-1-21956 | NS_000200.1    | - | 51565277 | 51565229 |
| Sma-1-21957 | NS_000200.1    | - | 49065687 | 49065639 |
| Sma-1-21958 | NS_000200.1    | - | 48364214 | 48364166 |
| Sma-1-21959 | NS_000200.1    | - | 42996965 | 42996917 |
| Sma-1-21960 | NS_000200.1    | - | 42916702 | 42916654 |
| Sma-1-21961 | NS_000200.1    | - | 39780267 | 39780219 |
| Sma-1-21962 | NS_000200.1    | - | 39048310 | 39048262 |
| Sma-1-21963 | NS_000200.1    | - | 36775222 | 36775174 |
| Sma-1-21964 | NS_000200.1    | - | 35816345 | 35816297 |
| Sma-1-21965 | NS_000200.1    | - | 31682788 | 31682740 |
| Sma-1-21966 | NS_000200.1    | - | 30015712 | 30015664 |
| Sma-1-21967 | NS_000200.1    | - | 29272127 | 29272079 |
| Sma-1-21968 | NS_000200.1    | - | 28607739 | 28607691 |
| Sma-1-21969 | NS_000200.1    | - | 27978044 | 27977996 |
| Sma-1-21970 | NS_000200.1    | - | 25613865 | 25613817 |
| Sma-1-21971 | NS_000200.1    | - | 24712357 | 24712309 |
| Sma-1-21972 | NS_000200.1    | - | 18938612 | 18938564 |
| Sma-1-21973 | NS_000200.1    | - | 17251788 | 17251740 |
| Sma-1-21974 | NS_000200.1    | - | 16904784 | 16904736 |
| Sma-1-21975 | NS_000200.1    | - | 15668553 | 15668505 |
| Sma-1-21976 | NS_000200.1    | - | 14277411 | 14277363 |
| Sma-1-21977 | NS_000200.1    | - | 12065242 | 12065194 |
| Sma-1-21978 | NS_000200.1    | - | 11486019 | 11485971 |
| Sma-1-21979 | NS_000200.1    | - | 11080558 | 11080510 |
| Sma-1-21980 | NS_000200.1    | - | 9371194  | 9371146  |
| Sma-1-21981 | NS_000200.1    | - | 8797198  | 8797150  |
| Sma-1-21982 | NS_000200.1    | - | 8518195  | 8518147  |
| Sma-1-21983 | NS_000200.1    | - | 8269273  | 8269225  |
| Sma-1-21984 | NS_000200.1    | - | 6128509  | 6128461  |
| Sma-1-21985 | NS_000200.1    | - | 5968350  | 5968302  |
| Sma-1-21986 | NS_000200.1    | - | 3463476  | 3463428  |
| Sma-1-21987 | NS_000200.1    | - | 2311860  | 2311812  |
| Sma-1-21988 | NS_000200.1    | - | 2299500  | 2299452  |
| Sma-1-21989 | NS_000200.1    | - | 711079   | 711031   |
| Sma-1-21990 | NS_000200.1    | - | 24825    | 24777    |
| Sma-1-21991 | NW_003020957.1 | - | 452      | 404      |
| Sma-1-21992 | NW_003029647.1 | - | 2929     | 2881     |
| Sma-1-21993 | NW_003034530.1 | - | 289      | 241      |
| Sma-1-21994 | NW_003038244.1 | + | 136522   | 136570   |
| Sma-1-21995 | NW_003037796.1 | - | 509471   | 509423   |
| Sma-1-21996 | NW_003037798.1 | + | 1221327  | 1221375  |
| Sma-1-21997 | NW_003037805.1 | + | 224869   | 224917   |
| Sma-1-21998 | NW_003037806.1 | - | 116316   | 116268   |
| Sma-1-21999 | NW_003037844.1 | + | 555418   | 555466   |
| Sma-1-22000 | NW_003037863.1 | + | 149113   | 149161   |
| Sma-1-22001 | NW_003037921.1 | - | 21606    | 21558    |
| Sma-1-22002 | NW_003037922.1 | + | 555116   | 555164   |
| Sma-1-22003 | NW_003037942.1 | - | 1045757  | 1045709  |
| Sma-1-22004 | NW_003037977.1 | + | 974284   | 974332   |

|             |                |   |           |           |
|-------------|----------------|---|-----------|-----------|
| Sma-1-22005 | NW_003038016.1 | + | 533861    | 533909    |
| Sma-1-22006 | NW_003038031.1 | + | 384145    | 384193    |
| Sma-1-22007 | NW_003038260.1 | - | 71845     | 71797     |
| Sma-1-22008 | NW_003039127.1 | - | 424303    | 424255    |
| Sma-1-22009 | NW_003026515.1 | + | 334936    | 334984    |
| Sma-1-22010 | NW_003038081.1 | - | 250511    | 250463    |
| Sma-1-22011 | NW_003038126.1 | - | 86861     | 86813     |
| Sma-1-22012 | NS_000200.1    | + | 15480485  | 15480533  |
| Sma-1-22013 | NS_000200.1    | + | 26782713  | 26782761  |
| Sma-1-22014 | NS_000200.1    | + | 86738864  | 86738912  |
| Sma-1-22015 | NS_000200.1    | + | 106907480 | 106907528 |
| Sma-1-22016 | NS_000200.1    | + | 170479113 | 170479161 |
| Sma-1-22017 | NS_000200.1    | + | 209260304 | 209260352 |
| Sma-1-22018 | NS_000200.1    | + | 231650398 | 231650446 |
| Sma-1-22019 | NS_000200.1    | + | 244661903 | 244661951 |
| Sma-1-22020 | NS_000200.1    | + | 290979347 | 290979395 |
| Sma-1-22021 | NS_000200.1    | + | 315281727 | 315281775 |
| Sma-1-22022 | NS_000200.1    | - | 367684293 | 367684245 |
| Sma-1-22023 | NS_000200.1    | - | 366344663 | 366344615 |
| Sma-1-22024 | NS_000200.1    | - | 326867632 | 326867584 |
| Sma-1-22025 | NS_000200.1    | - | 323243620 | 323243572 |
| Sma-1-22026 | NS_000200.1    | - | 280097273 | 280097225 |
| Sma-1-22027 | NS_000200.1    | - | 269412554 | 269412506 |
| Sma-1-22028 | NS_000200.1    | - | 186805665 | 186805617 |
| Sma-1-22029 | NS_000200.1    | - | 169551741 | 169551693 |
| Sma-1-22030 | NS_000200.1    | - | 113501802 | 113501754 |
| Sma-1-22031 | NS_000200.1    | - | 28311530  | 28311482  |
| Sma-1-22032 | NS_000200.1    | - | 8719115   | 8719067   |
| Sma-1-22033 | NW_003022720.1 | + | 1070      | 1118      |
| Sma-1-22034 | NW_003037920.1 | - | 248839    | 248791    |
| Sma-1-22035 | NW_003037853.1 | + | 735914    | 735962    |
| Sma-1-22036 | NW_003037888.1 | + | 592933    | 592981    |
| Sma-1-22037 | NW_003037896.1 | - | 91741     | 91693     |
| Sma-1-22038 | NW_003037974.1 | - | 6026      | 5978      |
| Sma-1-22039 | NW_003038260.1 | - | 258282    | 258234    |
| Sma-1-22040 | NW_003038498.1 | + | 37686     | 37734     |
| Sma-1-22041 | NS_000200.1    | + | 96227965  | 96228013  |
| Sma-1-22042 | NS_000200.1    | + | 132801425 | 132801473 |
| Sma-1-22043 | NS_000200.1    | + | 334457898 | 334457946 |
| Sma-1-22044 | NS_000200.1    | + | 367983461 | 367983509 |
| Sma-1-22045 | NS_000200.1    | - | 323430057 | 323430009 |
| Sma-1-22046 | NS_000200.1    | - | 204681332 | 204681284 |
| Sma-1-22047 | NS_000200.1    | - | 169429646 | 169429598 |
| Sma-1-22048 | NS_000200.1    | - | 143012164 | 143012116 |
| Sma-1-22049 | NW_003024967.1 | - | 1111      | 1063      |
| Sma-1-22050 | NW_003025215.1 | + | 466       | 514       |
| Sma-1-22051 | NW_003026614.1 | - | 49922     | 49874     |
| Sma-1-22052 | NW_003038514.1 | - | 153112    | 153064    |
| Sma-1-22053 | NW_003026607.1 | - | 106579    | 106531    |
| Sma-1-22054 | NW_003038009.1 | - | 69031     | 68983     |
| Sma-1-22055 | NW_003037795.1 | + | 1033271   | 1033319   |
| Sma-1-22056 | NW_003037796.1 | - | 1463422   | 1463374   |

|             |                |   |           |           |
|-------------|----------------|---|-----------|-----------|
| Sma-1-22057 | NW_003037797.1 | + | 539612    | 539660    |
| Sma-1-22058 | NW_003037806.1 | + | 904251    | 904299    |
| Sma-1-22059 | NW_003037821.1 | - | 877383    | 877335    |
| Sma-1-22060 | NW_003037823.1 | + | 932686    | 932734    |
| Sma-1-22061 | NW_003037891.1 | - | 2768752   | 2768704   |
| Sma-1-22062 | NW_003037907.1 | - | 75404     | 75356     |
| Sma-1-22063 | NS_000200.1    | + | 7424154   | 7424202   |
| Sma-1-22064 | NS_000200.1    | + | 10967472  | 10967520  |
| Sma-1-22065 | NS_000200.1    | + | 29099465  | 29099513  |
| Sma-1-22066 | NS_000200.1    | + | 56849305  | 56849353  |
| Sma-1-22067 | NS_000200.1    | + | 361409437 | 361409485 |
| Sma-1-22068 | NS_000200.1    | - | 355827014 | 355826966 |
| Sma-1-22069 | NS_000200.1    | - | 339777651 | 339777603 |
| Sma-1-22070 | NS_000200.1    | - | 315946653 | 315946605 |
| Sma-1-22071 | NS_000200.1    | - | 308138964 | 308138916 |
| Sma-1-22072 | NS_000200.1    | - | 226443094 | 226443046 |
| Sma-1-22073 | NS_000200.1    | - | 151479893 | 151479845 |
| Sma-1-22074 | NS_000200.1    | - | 140650030 | 140649982 |
| Sma-1-22075 | NS_000200.1    | - | 54021867  | 54021819  |
| Sma-1-22076 | NS_000200.1    | - | 9673066   | 9673018   |
| Sma-1-22077 | NW_003025837.1 | - | 904       | 856       |
| Sma-1-22078 | NW_003037794.1 | - | 1961893   | 1961845   |
| Sma-1-22079 | NW_003037804.1 | - | 530551    | 530503    |
| Sma-1-22080 | NW_003037981.1 | - | 1147508   | 1147460   |
| Sma-1-22081 | NW_003038038.1 | + | 825977    | 826025    |
| Sma-1-22082 | NS_000200.1    | + | 252729370 | 252729418 |
| Sma-1-22083 | NS_000200.1    | - | 356613835 | 356613787 |
| Sma-1-22084 | NS_000200.1    | - | 213545376 | 213545328 |
| Sma-1-22085 | NS_000200.1    | - | 25670571  | 25670523  |
| Sma-1-22086 | NS_000200.1    | - | 6141488   | 6141440   |
| Sma-1-22087 | NW_003026465.1 | + | 362861    | 362909    |
| Sma-1-22088 | NS_000200.1    | + | 207755455 | 207755503 |
| Sma-1-22089 | NW_003037913.1 | + | 567628    | 567676    |
| Sma-1-22090 | NS_000200.1    | + | 159131379 | 159131427 |
| Sma-1-22091 | NW_003037952.1 | - | 30307     | 30259     |
| Sma-1-22092 | NW_003037866.1 | - | 441130    | 441082    |
| Sma-1-22093 | NW_003037972.1 | - | 413633    | 413585    |
| Sma-1-22094 | NW_003037975.1 | - | 752253    | 752205    |
| Sma-1-22095 | NS_000200.1    | - | 206334477 | 206334429 |
| Sma-1-22096 | NS_000200.1    | - | 202889337 | 202889289 |
| Sma-1-22097 | NS_000200.1    | - | 192850440 | 192850392 |
| Sma-1-22098 | NS_000200.1    | - | 111928929 | 111928881 |
| Sma-1-22099 | NW_003037980.1 | + | 249044    | 249092    |
| Sma-1-22100 | NS_000200.1    | + | 211209906 | 211209954 |
| Sma-1-22101 | NW_003037831.1 | + | 685594    | 685642    |
| Sma-1-22102 | NS_000200.1    | + | 70134896  | 70134944  |
| Sma-1-22103 | NW_003026464.1 | + | 71244     | 71292     |
| Sma-1-22104 | NW_003026577.1 | + | 26261     | 26309     |
| Sma-1-22105 | NS_000200.1    | + | 203371553 | 203371601 |
| Sma-1-22106 | NS_000200.1    | + | 302697517 | 302697565 |
| Sma-1-22107 | NW_003037833.1 | + | 904118    | 904166    |
| Sma-1-22108 | NS_000200.1    | + | 73095214  | 73095262  |

|             |                |   |           |           |
|-------------|----------------|---|-----------|-----------|
| Sma-1-22109 | NW_003037982.1 | + | 583713    | 583761    |
| Sma-1-22110 | NS_000200.1    | + | 214242908 | 214242956 |
| Sma-1-22111 | NW_003037898.1 | - | 207320    | 207272    |
| Sma-1-22112 | NS_000200.1    | - | 144191142 | 144191094 |
| Sma-1-22113 | NW_003038250.1 | + | 272760    | 272808    |
| Sma-1-22114 | NS_000200.1    | + | 318325437 | 318325485 |
| Sma-1-22115 | NW_003037823.1 | + | 879059    | 879107    |
| Sma-1-22116 | NW_003037935.1 | - | 532835    | 532787    |
| Sma-1-22117 | NW_003037946.1 | + | 815155    | 815203    |
| Sma-1-22118 | NW_003038261.1 | - | 306381    | 306333    |
| Sma-1-22119 | NS_000200.1    | + | 56795678  | 56795726  |
| Sma-1-22120 | NS_000200.1    | + | 191509015 | 191509063 |
| Sma-1-22121 | NS_000200.1    | - | 323920032 | 323919984 |
| Sma-1-22122 | NS_000200.1    | - | 179949370 | 179949322 |
| Sma-1-22123 | NW_003024576.1 | + | 244       | 292       |
| Sma-1-22124 | NW_003037839.1 | + | 635109    | 635157    |
| Sma-1-22125 | NW_003037893.1 | + | 402131    | 402179    |
| Sma-1-22126 | NW_003038012.1 | - | 295364    | 295316    |
| Sma-1-22127 | NS_000200.1    | + | 79593259  | 79593307  |
| Sma-1-22128 | NS_000200.1    | + | 141516441 | 141516489 |
| Sma-1-22129 | NS_000200.1    | + | 348885373 | 348885421 |
| Sma-1-22130 | NS_000200.1    | - | 228619303 | 228619255 |
| Sma-1-22131 | NW_003037854.1 | - | 1238982   | 1238934   |
| Sma-1-22132 | NW_003037953.1 | + | 87586     | 87634     |
| Sma-1-22133 | NW_003038035.1 | + | 809017    | 809065    |
| Sma-1-22134 | NS_000200.1    | + | 193000637 | 193000685 |
| Sma-1-22135 | NS_000200.1    | + | 248670509 | 248670557 |
| Sma-1-22136 | NS_000200.1    | - | 98143403  | 98143355  |
| Sma-1-22137 | NW_003037887.1 | - | 272783    | 272735    |
| Sma-1-22138 | NS_000200.1    | - | 130736761 | 130736713 |
| Sma-1-22139 | NW_003037504.1 | + | 2012      | 2060      |
| Sma-1-22140 | NW_003038443.1 | + | 13475     | 13523     |
| Sma-1-22141 | NW_003038216.1 | + | 50005     | 50053     |
| Sma-1-22142 | NW_003037793.1 | + | 2307370   | 2307418   |
| Sma-1-22143 | NW_003037795.1 | - | 627979    | 627931    |
| Sma-1-22144 | NW_003037814.1 | + | 207009    | 207057    |
| Sma-1-22145 | NW_003037852.1 | - | 93918     | 93870     |
| Sma-1-22146 | NW_003037877.1 | + | 177872    | 177920    |
| Sma-1-22147 | NW_003037884.1 | - | 1110269   | 1110221   |
| Sma-1-22148 | NW_003037885.1 | + | 483721    | 483769    |
| Sma-1-22149 | NW_003037916.1 | + | 470995    | 471043    |
| Sma-1-22150 | NW_003037926.1 | + | 789351    | 789399    |
| Sma-1-22151 | NW_003037976.1 | + | 421281    | 421329    |
| Sma-1-22152 | NW_003037978.1 | - | 39644     | 39596     |
| Sma-1-22153 | NW_003037981.1 | + | 903270    | 903318    |
| Sma-1-22154 | NW_003038038.1 | + | 384471    | 384519    |
| Sma-1-22155 | NW_003038257.1 | - | 354514    | 354466    |
| Sma-1-22156 | NW_003038161.1 | + | 262645    | 262693    |
| Sma-1-22157 | NS_000200.1    | + | 2307370   | 2307418   |
| Sma-1-22158 | NS_000200.1    | + | 43190869  | 43190917  |
| Sma-1-22159 | NS_000200.1    | + | 121216434 | 121216482 |
| Sma-1-22160 | NS_000200.1    | + | 128581668 | 128581716 |

|             |                |   |           |           |
|-------------|----------------|---|-----------|-----------|
| Sma-1-22161 | NS_000200.1    | + | 163664406 | 163664454 |
| Sma-1-22162 | NS_000200.1    | + | 173957621 | 173957669 |
| Sma-1-22163 | NS_000200.1    | + | 207035596 | 207035644 |
| Sma-1-22164 | NS_000200.1    | + | 213301138 | 213301186 |
| Sma-1-22165 | NS_000200.1    | + | 252287864 | 252287912 |
| Sma-1-22166 | NS_000200.1    | + | 297632496 | 297632544 |
| Sma-1-22167 | NS_000200.1    | + | 306835637 | 306835685 |
| Sma-1-22168 | NS_000200.1    | + | 330043121 | 330043169 |
| Sma-1-22169 | NS_000200.1    | + | 370603327 | 370603375 |
| Sma-1-22170 | NS_000200.1    | - | 321528842 | 321528794 |
| Sma-1-22171 | NS_000200.1    | - | 209307654 | 209307606 |
| Sma-1-22172 | NS_000200.1    | - | 127889934 | 127889886 |
| Sma-1-22173 | NS_000200.1    | - | 94485813  | 94485765  |
| Sma-1-22174 | NS_000200.1    | - | 7018862   | 7018814   |
| Sma-1-22175 | NW_003038006.1 | + | 295110    | 295158    |
| Sma-1-22176 | NS_000200.1    | + | 225179594 | 225179642 |
| Sma-1-22177 | NW_003022118.1 | + | 209       | 257       |
| Sma-1-22178 | NW_003036940.1 | - | 3308      | 3260      |
| Sma-1-22179 | NS_000200.1    | + | 360742241 | 360742289 |
| Sma-1-22180 | NS_000200.1    | - | 343512582 | 343512534 |
| Sma-1-22181 | NW_003038008.1 | - | 575134    | 575086    |
| Sma-1-22182 | NS_000200.1    | - | 226248230 | 226248182 |
| Sma-1-22183 | NW_003037886.1 | - | 749654    | 749606    |
| Sma-1-22184 | NS_000200.1    | - | 130005221 | 130005173 |
| Sma-1-22185 | NW_003038014.1 | + | 37315     | 37363     |
| Sma-1-22186 | NS_000200.1    | + | 229778004 | 229778052 |
| Sma-1-22187 | NW_003037884.1 | + | 101499    | 101547    |
| Sma-1-22188 | NS_000200.1    | + | 126881164 | 126881212 |
| Sma-1-22189 | NW_003032361.1 | + | 855       | 903       |
| Sma-1-22190 | NW_003037838.1 | - | 580987    | 580939    |
| Sma-1-22191 | NW_003037966.1 | - | 256404    | 256356    |
| Sma-1-22192 | NS_000200.1    | + | 345951715 | 345951763 |
| Sma-1-22193 | NS_000200.1    | - | 198958267 | 198958219 |
| Sma-1-22194 | NS_000200.1    | - | 78579550  | 78579502  |
| Sma-1-22195 | NW_003037944.1 | - | 563542    | 563494    |
| Sma-1-22196 | NS_000200.1    | - | 188784895 | 188784847 |
| Sma-1-22197 | NW_003038055.1 | + | 216916    | 216964    |
| Sma-1-22198 | NS_000200.1    | + | 258916238 | 258916286 |
| Sma-1-22199 | NW_003037801.1 | + | 620247    | 620295    |
| Sma-1-22200 | NS_000200.1    | + | 21709727  | 21709775  |
| Sma-1-22201 | NW_003038019.1 | + | 577536    | 577585    |
| Sma-1-22202 | NS_000200.1    | + | 233894354 | 233894403 |
| Sma-1-22203 | NW_003038157.1 | - | 510950    | 510901    |
| Sma-1-22204 | NS_000200.1    | - | 295761870 | 295761821 |
| Sma-1-22205 | NW_003038117.1 | + | 136911    | 136960    |
| Sma-1-22206 | NS_000200.1    | + | 277454736 | 277454785 |
| Sma-1-22207 | NW_003026619.1 | - | 127477    | 127428    |
| Sma-1-22208 | NS_000200.1    | - | 322318221 | 322318172 |
| Sma-1-22209 | NW_003037886.1 | + | 106168    | 106217    |
| Sma-1-22210 | NS_000200.1    | + | 129361735 | 129361784 |
| Sma-1-22211 | NW_003037888.1 | - | 132476    | 132427    |
| Sma-1-22212 | NS_000200.1    | - | 132340968 | 132340919 |

|             |                |   |           |           |
|-------------|----------------|---|-----------|-----------|
| Sma-1-22213 | NW_003037794.1 | + | 306280    | 306328    |
| Sma-1-22214 | NS_000200.1    | + | 4485875   | 4485923   |
| Sma-1-22215 | NW_003037794.1 | + | 2098671   | 2098719   |
| Sma-1-22216 | NS_000200.1    | + | 6278266   | 6278314   |
| Sma-1-22217 | NW_003037793.1 | + | 3819600   | 3819648   |
| Sma-1-22218 | NS_000200.1    | + | 3819600   | 3819648   |
| Sma-1-22219 | NW_003037818.1 | + | 1455631   | 1455679   |
| Sma-1-22220 | NW_003037884.1 | - | 771168    | 771120    |
| Sma-1-22221 | NS_000200.1    | + | 50171038  | 50171086  |
| Sma-1-22222 | NS_000200.1    | - | 127550833 | 127550785 |
| Sma-1-22223 | NW_003035881.1 | - | 342496    | 342448    |
| Sma-1-22224 | NS_000200.1    | - | 341406701 | 341406653 |
| Sma-1-22225 | NW_003037910.1 | - | 980270    | 980222    |
| Sma-1-22226 | NS_000200.1    | - | 155492245 | 155492197 |
| Sma-1-22227 | NW_003032266.1 | - | 52829     | 52781     |
| Sma-1-22228 | NS_000200.1    | - | 358243576 | 358243528 |
| Sma-1-22229 | NW_003031291.1 | - | 263       | 215       |
| Sma-1-22230 | NW_003037807.1 | + | 790107    | 790155    |
| Sma-1-22231 | NS_000200.1    | + | 31051623  | 31051671  |
| Sma-1-22232 | NS_000200.1    | - | 345678998 | 345678950 |
| Sma-1-22233 | NW_003031132.1 | + | 2117      | 2165      |
| Sma-1-22234 | NS_000200.1    | + | 325808837 | 325808885 |
| Sma-1-22235 | NW_003037825.1 | + | 566552    | 566600    |
| Sma-1-22236 | NS_000200.1    | + | 59696334  | 59696382  |
| Sma-1-22237 | NW_003037975.1 | - | 186803    | 186754    |
| Sma-1-22238 | NS_000200.1    | - | 205769027 | 205768978 |
| Sma-1-22239 | NW_003037987.1 | - | 36935     | 36887     |
| Sma-1-22240 | NS_000200.1    | - | 215789556 | 215789508 |
| Sma-1-22241 | NW_003037991.1 | - | 391238    | 391190    |
| Sma-1-22242 | NS_000200.1    | - | 217540806 | 217540758 |
| Sma-1-22243 | NW_003037964.1 | - | 491571    | 491523    |
| Sma-1-22244 | NW_003038147.1 | - | 480166    | 480118    |
| Sma-1-22245 | NS_000200.1    | - | 290007909 | 290007861 |
| Sma-1-22246 | NS_000200.1    | - | 198093093 | 198093045 |
| Sma-1-22247 | NW_003037829.1 | + | 824088    | 824136    |
| Sma-1-22248 | NS_000200.1    | + | 66724626  | 66724674  |
| Sma-1-22249 | NW_003037894.1 | + | 462822    | 462870    |
| Sma-1-22250 | NS_000200.1    | + | 142359395 | 142359443 |
| Sma-1-22251 | NW_003037881.1 | + | 851623    | 851671    |
| Sma-1-22252 | NW_003037922.1 | - | 253087    | 253039    |
| Sma-1-22253 | NS_000200.1    | + | 125283414 | 125283462 |
| Sma-1-22254 | NS_000200.1    | - | 170177084 | 170177036 |
| Sma-1-22255 | NW_003039130.1 | + | 113655    | 113703    |
| Sma-1-22256 | NS_000200.1    | + | 317788266 | 317788314 |
| Sma-1-22257 | NW_003037888.1 | - | 1474582   | 1474534   |
| Sma-1-22258 | NS_000200.1    | - | 133683074 | 133683026 |
| Sma-1-22259 | NW_003037769.1 | - | 2736      | 2688      |
| Sma-1-22260 | NS_000200.1    | - | 378147688 | 378147640 |
| Sma-1-22261 | NW_003022453.1 | + | 729       | 777       |
| Sma-1-22262 | NS_000200.1    | + | 364970494 | 364970542 |
| Sma-1-22263 | NW_003037979.1 | - | 24052     | 24004     |
| Sma-1-22264 | NS_000200.1    | - | 210085072 | 210085024 |



|             |                |   |           |           |
|-------------|----------------|---|-----------|-----------|
| Sma-1-22265 | NW_003038019.1 | - | 521635    | 521587    |
| Sma-1-22266 | NS_000200.1    | - | 233838453 | 233838405 |
| Sma-1-22267 | NW_003038514.1 | - | 306813    | 306765    |
| Sma-1-22268 | NW_003038077.1 | - | 128903    | 128855    |
| Sma-1-22269 | NS_000200.1    | - | 339931352 | 339931304 |
| Sma-1-22270 | NS_000200.1    | - | 266900543 | 266900495 |
| Sma-1-22271 | NW_003037854.1 | + | 669102    | 669150    |
| Sma-1-22272 | NS_000200.1    | + | 97573523  | 97573571  |
| Sma-1-22273 | NW_003037854.1 | - | 675743    | 675695    |
| Sma-1-22274 | NS_000200.1    | - | 97580164  | 97580116  |
| Sma-1-22275 | NW_003038008.1 | + | 505729    | 505777    |
| Sma-1-22276 | NS_000200.1    | + | 226178825 | 226178873 |
| Sma-1-22277 | NW_003026472.1 | + | 92550     | 92598     |
| Sma-1-22278 | NS_000200.1    | + | 236504542 | 236504590 |
| Sma-1-22279 | NW_003037978.1 | - | 529614    | 529566    |
| Sma-1-22280 | NS_000200.1    | - | 209797624 | 209797576 |
| Sma-1-22281 | NW_003037854.1 | + | 3193      | 3241      |
| Sma-1-22282 | NW_003038158.1 | - | 316894    | 316846    |
| Sma-1-22283 | NS_000200.1    | + | 96907614  | 96907662  |
| Sma-1-22284 | NS_000200.1    | - | 296200062 | 296200014 |
| Sma-1-22285 | NW_003038218.1 | - | 230157    | 230109    |
| Sma-1-22286 | NS_000200.1    | - | 307670455 | 307670407 |
| Sma-1-22287 | NW_003038034.1 | - | 253850    | 253802    |
| Sma-1-22288 | NS_000200.1    | - | 247195606 | 247195558 |
| Sma-1-22289 | NW_003037804.1 | - | 400649    | 400601    |
| Sma-1-22290 | NW_003038072.1 | + | 324939    | 324987    |
| Sma-1-22291 | NW_003038056.1 | - | 1968      | 1920      |
| Sma-1-22292 | NW_003038124.1 | - | 44476     | 44428     |
| Sma-1-22293 | NS_000200.1    | + | 265487167 | 265487215 |
| Sma-1-22294 | NS_000200.1    | - | 279037120 | 279037072 |
| Sma-1-22295 | NS_000200.1    | - | 258979619 | 258979571 |
| Sma-1-22296 | NS_000200.1    | - | 25540669  | 25540621  |
| Sma-1-22297 | NW_003037813.1 | + | 1331823   | 1331871   |
| Sma-1-22298 | NS_000200.1    | + | 42318686  | 42318734  |
| Sma-1-22299 | NW_003037580.1 | - | 26220     | 26172     |
| Sma-1-22300 | NS_000200.1    | - | 372329434 | 372329386 |
| Sma-1-22301 | NW_003037826.1 | + | 1284241   | 1284289   |
| Sma-1-22302 | NS_000200.1    | + | 62283757  | 62283805  |
| Sma-1-22303 | NW_003038159.1 | + | 61962     | 62010     |
| Sma-1-22304 | NS_000200.1    | + | 296449983 | 296450031 |
| Sma-1-22305 | NW_003026456.1 | + | 508072    | 508120    |
| Sma-1-22306 | NW_003037877.1 | + | 290967    | 291015    |
| Sma-1-22307 | NS_000200.1    | + | 58431208  | 58431256  |
| Sma-1-22308 | NS_000200.1    | + | 121329529 | 121329577 |
| Sma-1-22309 | NW_003038151.1 | - | 209091    | 209043    |
| Sma-1-22310 | NS_000200.1    | - | 292116334 | 292116286 |
| Sma-1-22311 | NW_003037909.1 | + | 538922    | 538970    |
| Sma-1-22312 | NW_003038518.1 | + | 302142    | 302190    |
| Sma-1-22313 | NS_000200.1    | + | 154080571 | 154080619 |
| Sma-1-22314 | NS_000200.1    | + | 341938975 | 341939023 |
| Sma-1-22315 | NW_003038112.1 | - | 101434    | 101386    |
| Sma-1-22316 | NS_000200.1    | - | 276556612 | 276556564 |

|             |                |   |           |           |
|-------------|----------------|---|-----------|-----------|
| Sma-1-22317 | NW_003038276.1 | + | 9767      | 9815      |
| Sma-1-22318 | NS_000200.1    | + | 325170122 | 325170170 |
| Sma-1-22319 | NW_003038029.1 | - | 801492    | 801444    |
| Sma-1-22320 | NS_000200.1    | - | 243002393 | 243002345 |
| Sma-1-22321 | NW_003037942.1 | - | 389540    | 389492    |
| Sma-1-22322 | NS_000200.1    | - | 186149448 | 186149400 |
| Sma-1-22323 | NW_003038137.1 | - | 186507    | 186459    |
| Sma-1-22324 | NS_000200.1    | - | 284975403 | 284975355 |
| Sma-1-22325 | NW_003037879.1 | - | 473021    | 472973    |
| Sma-1-22326 | NS_000200.1    | - | 123475277 | 123475229 |
| Sma-1-22327 | NW_003033803.1 | - | 1291      | 1243      |
| Sma-1-22328 | NW_003026617.1 | - | 56645     | 56597     |
| Sma-1-22329 | NW_003037793.1 | - | 1364      | 1316      |
| Sma-1-22330 | NW_003037800.1 | + | 2200467   | 2200515   |
| Sma-1-22331 | NW_003037803.1 | - | 1140513   | 1140465   |
| Sma-1-22332 | NW_003037822.1 | - | 1196763   | 1196715   |
| Sma-1-22333 | NW_003037877.1 | - | 298181    | 298133    |
| Sma-1-22334 | NW_003037953.1 | + | 62507     | 62555     |
| Sma-1-22335 | NW_003038008.1 | + | 282343    | 282391    |
| Sma-1-22336 | NW_003038008.1 | + | 308484    | 308532    |
| Sma-1-22337 | NW_003038008.1 | + | 571313    | 571361    |
| Sma-1-22338 | NS_000200.1    | + | 20829827  | 20829875  |
| Sma-1-22339 | NS_000200.1    | + | 192975558 | 192975606 |
| Sma-1-22340 | NS_000200.1    | + | 225955439 | 225955487 |
| Sma-1-22341 | NS_000200.1    | + | 225981580 | 225981628 |
| Sma-1-22342 | NS_000200.1    | + | 226244409 | 226244457 |
| Sma-1-22343 | NS_000200.1    | - | 359035258 | 359035210 |
| Sma-1-22344 | NS_000200.1    | - | 319627504 | 319627456 |
| Sma-1-22345 | NS_000200.1    | - | 121336743 | 121336695 |
| Sma-1-22346 | NS_000200.1    | - | 55504769  | 55504721  |
| Sma-1-22347 | NS_000200.1    | - | 24641050  | 24641002  |
| Sma-1-22348 | NS_000200.1    | - | 1364      | 1316      |
| Sma-1-22349 | NW_003038033.1 | + | 796420    | 796468    |
| Sma-1-22350 | NS_000200.1    | + | 246776422 | 246776470 |
| Sma-1-22351 | NW_003037795.1 | - | 1599883   | 1599835   |
| Sma-1-22352 | NS_000200.1    | - | 7990766   | 7990718   |
| Sma-1-22353 | NW_003037797.1 | - | 755365    | 755317    |
| Sma-1-22354 | NS_000200.1    | - | 11183225  | 11183177  |
| Sma-1-22355 | NW_003037800.1 | + | 2422821   | 2422869   |
| Sma-1-22356 | NS_000200.1    | + | 21052181  | 21052229  |
| Sma-1-22357 | NW_003037800.1 | + | 579419    | 579468    |
| Sma-1-22358 | NS_000200.1    | + | 19208779  | 19208828  |
| Sma-1-22359 | NW_003037807.1 | - | 1297708   | 1297660   |
| Sma-1-22360 | NS_000200.1    | - | 31559224  | 31559176  |
| Sma-1-22361 | NW_003037804.1 | + | 887836    | 887884    |
| Sma-1-22362 | NW_003037804.1 | + | 888369    | 888417    |
| Sma-1-22363 | NS_000200.1    | + | 26027856  | 26027904  |
| Sma-1-22364 | NS_000200.1    | + | 26028389  | 26028437  |
| Sma-1-22365 | NW_003037845.1 | - | 500939    | 500891    |
| Sma-1-22366 | NS_000200.1    | - | 87502842  | 87502794  |
| Sma-1-22367 | NW_003038022.1 | - | 562968    | 562920    |
| Sma-1-22368 | NS_000200.1    | - | 236243810 | 236243762 |

|             |                |   |           |           |
|-------------|----------------|---|-----------|-----------|
| Sma-1-22369 | NW_003032210.1 | + | 921       | 969       |
| Sma-1-22370 | NW_003038002.1 | + | 62592     | 62640     |
| Sma-1-22371 | NW_003037818.1 | + | 860530    | 860578    |
| Sma-1-22372 | NW_003037914.1 | + | 821291    | 821339    |
| Sma-1-22373 | NW_003037998.1 | - | 19185     | 19137     |
| Sma-1-22374 | NW_003038083.1 | + | 172916    | 172964    |
| Sma-1-22375 | NW_003038085.1 | - | 375375    | 375327    |
| Sma-1-22376 | NW_003038126.1 | + | 243757    | 243805    |
| Sma-1-22377 | NW_003038161.1 | - | 509556    | 509508    |
| Sma-1-22378 | NS_000200.1    | + | 49575937  | 49575985  |
| Sma-1-22379 | NS_000200.1    | + | 160965541 | 160965589 |
| Sma-1-22380 | NS_000200.1    | + | 223182801 | 223182849 |
| Sma-1-22381 | NS_000200.1    | + | 270416253 | 270416301 |
| Sma-1-22382 | NS_000200.1    | + | 280254169 | 280254217 |
| Sma-1-22383 | NS_000200.1    | + | 357915750 | 357915798 |
| Sma-1-22384 | NS_000200.1    | - | 297879407 | 297879359 |
| Sma-1-22385 | NS_000200.1    | - | 272065468 | 272065420 |
| Sma-1-22386 | NS_000200.1    | - | 221305781 | 221305733 |
| Sma-1-22387 | NW_003037918.1 | - | 528445    | 528397    |
| Sma-1-22388 | NS_000200.1    | - | 167095435 | 167095387 |
| Sma-1-22389 | NW_003037925.1 | + | 216126    | 216174    |
| Sma-1-22390 | NS_000200.1    | + | 172618129 | 172618177 |
| Sma-1-22391 | NW_003038137.1 | + | 185833    | 185881    |
| Sma-1-22392 | NS_000200.1    | + | 284974729 | 284974777 |
| Sma-1-22393 | NW_003038261.1 | - | 825630    | 825582    |
| Sma-1-22394 | NS_000200.1    | - | 324439281 | 324439233 |
| Sma-1-22395 | NW_003038507.1 | - | 115633    | 115585    |
| Sma-1-22396 | NS_000200.1    | - | 336784527 | 336784479 |
| Sma-1-22397 | NW_003038249.1 | - | 168436    | 168388    |
| Sma-1-22398 | NW_003037797.1 | + | 1266553   | 1266601   |
| Sma-1-22399 | NW_003037906.1 | + | 90724     | 90772     |
| Sma-1-22400 | NW_003038021.1 | - | 127193    | 127145    |
| Sma-1-22401 | NW_003038030.1 | + | 883615    | 883663    |
| Sma-1-22402 | NW_003038038.1 | + | 381901    | 381949    |
| Sma-1-22403 | NS_000200.1    | + | 11694413  | 11694461  |
| Sma-1-22404 | NS_000200.1    | + | 150398503 | 150398551 |
| Sma-1-22405 | NS_000200.1    | + | 244019482 | 244019530 |
| Sma-1-22406 | NS_000200.1    | + | 252285294 | 252285342 |
| Sma-1-22407 | NS_000200.1    | - | 316850689 | 316850641 |
| Sma-1-22408 | NS_000200.1    | - | 234955768 | 234955720 |
| Sma-1-22409 | NW_003037803.1 | - | 523614    | 523566    |
| Sma-1-22410 | NS_000200.1    | - | 24024151  | 24024103  |
| Sma-1-22411 | NW_003037921.1 | + | 40729     | 40777     |
| Sma-1-22412 | NS_000200.1    | + | 169570864 | 169570912 |
| Sma-1-22413 | NW_003035877.1 | - | 50709     | 50661     |
| Sma-1-22414 | NS_000200.1    | - | 337031243 | 337031195 |
| Sma-1-22415 | NW_003038163.1 | + | 314520    | 314568    |
| Sma-1-22416 | NS_000200.1    | + | 298714800 | 298714848 |
| Sma-1-22417 | NW_003037858.1 | + | 257157    | 257205    |
| Sma-1-22418 | NS_000200.1    | + | 100921433 | 100921481 |
| Sma-1-22419 | NW_003037874.1 | + | 206652    | 206700    |
| Sma-1-22420 | NW_003037793.1 | - | 3228728   | 3228680   |

|             |                |   |           |           |
|-------------|----------------|---|-----------|-----------|
| Sma-1-22421 | NW_003037824.1 | - | 907319    | 907271    |
| Sma-1-22422 | NW_003037878.1 | - | 189316    | 189268    |
| Sma-1-22423 | NS_000200.1    | + | 119631602 | 119631650 |
| Sma-1-22424 | NS_000200.1    | - | 122242794 | 122242746 |
| Sma-1-22425 | NS_000200.1    | - | 57838259  | 57838211  |
| Sma-1-22426 | NS_000200.1    | - | 3228728   | 3228680   |
| Sma-1-22427 | NW_003038155.1 | - | 390338    | 390290    |
| Sma-1-22428 | NS_000200.1    | - | 294513456 | 294513408 |
| Sma-1-22429 | NW_003037579.1 | + | 11526     | 11574     |
| Sma-1-22430 | NS_000200.1    | + | 372296468 | 372296516 |
| Sma-1-22431 | NW_003039127.1 | - | 299313    | 299265    |
| Sma-1-22432 | NS_000200.1    | - | 113376812 | 113376764 |
| Sma-1-22433 | NW_003037976.1 | + | 369975    | 370023    |
| Sma-1-22434 | NS_000200.1    | + | 206984290 | 206984338 |
| Sma-1-22435 | NW_003037916.1 | - | 94037     | 93989     |
| Sma-1-22436 | NW_003038169.1 | - | 45570     | 45522     |
| Sma-1-22437 | NS_000200.1    | - | 300528738 | 300528690 |
| Sma-1-22438 | NS_000200.1    | - | 163287448 | 163287400 |
| Sma-1-22439 | NW_003037925.1 | + | 12911     | 12959     |
| Sma-1-22440 | NS_000200.1    | + | 172414914 | 172414962 |
| Sma-1-22441 | NW_003038018.1 | + | 345318    | 345366    |
| Sma-1-22442 | NS_000200.1    | + | 232746168 | 232746216 |
| Sma-1-22443 | NW_003036431.1 | + | 28        | 76        |
| Sma-1-22444 | NS_000200.1    | + | 359973889 | 359973937 |
| Sma-1-22445 | NW_003038216.1 | - | 49772     | 49724     |
| Sma-1-22446 | NS_000200.1    | - | 306835404 | 306835356 |
| Sma-1-22447 | NW_003026471.1 | + | 9966      | 10014     |
| Sma-1-22448 | NS_000200.1    | + | 222122199 | 222122247 |
| Sma-1-22449 | NW_003026465.1 | - | 207715    | 207667    |
| Sma-1-22450 | NS_000200.1    | - | 207600309 | 207600261 |
| Sma-1-22451 | NW_003038042.1 | + | 167356    | 167404    |
| Sma-1-22452 | NS_000200.1    | + | 254112955 | 254113003 |
| Sma-1-22453 | NW_003037952.1 | + | 66505     | 66553     |
| Sma-1-22454 | NS_000200.1    | + | 192886638 | 192886686 |
| Sma-1-22455 | NW_003035602.1 | + | 7470      | 7518      |
| Sma-1-22456 | NS_000200.1    | + | 329346664 | 329346712 |
| Sma-1-22457 | NW_003037916.1 | + | 844200    | 844248    |
| Sma-1-22458 | NS_000200.1    | + | 164037611 | 164037659 |
| Sma-1-22459 | NW_003037797.1 | - | 3524701   | 3524653   |
| Sma-1-22460 | NS_000200.1    | - | 13952561  | 13952513  |
| Sma-1-22461 | NW_003037812.1 | - | 1062916   | 1062868   |
| Sma-1-22462 | NS_000200.1    | - | 40545655  | 40545607  |
| Sma-1-22463 | NW_003037863.1 | - | 233469    | 233421    |
| Sma-1-22464 | NS_000200.1    | - | 106991836 | 106991788 |
| Sma-1-22465 | NW_003037878.1 | - | 521369    | 521321    |
| Sma-1-22466 | NS_000200.1    | - | 122574847 | 122574799 |
| Sma-1-22467 | NW_003038161.1 | + | 337517    | 337565    |
| Sma-1-22468 | NS_000200.1    | + | 297707368 | 297707416 |
| Sma-1-22469 | NW_003037809.1 | + | 2185687   | 2185735   |
| Sma-1-22470 | NW_003037866.1 | + | 1319546   | 1319594   |
| Sma-1-22471 | NS_000200.1    | + | 35850151  | 35850199  |
| Sma-1-22472 | NS_000200.1    | + | 112807345 | 112807393 |

|             |                |   |           |           |
|-------------|----------------|---|-----------|-----------|
| Sma-1-22473 | NW_003038028.1 | - | 604885    | 604837    |
| Sma-1-22474 | NS_000200.1    | - | 241912459 | 241912411 |
| Sma-1-22475 | NW_003037812.1 | - | 1101050   | 1101002   |
| Sma-1-22476 | NS_000200.1    | - | 40583789  | 40583741  |
| Sma-1-22477 | NW_003037794.1 | + | 1815391   | 1815439   |
| Sma-1-22478 | NS_000200.1    | + | 5994986   | 5995034   |
| Sma-1-22479 | NW_003034696.1 | - | 688       | 640       |
| Sma-1-22480 | NW_003037817.1 | - | 884665    | 884617    |
| Sma-1-22481 | NS_000200.1    | - | 328209177 | 328209129 |
| Sma-1-22482 | NS_000200.1    | - | 48267017  | 48266969  |
| Sma-1-22483 | NW_003037814.1 | - | 1861395   | 1861347   |
| Sma-1-22484 | NW_003037976.1 | + | 541744    | 541792    |
| Sma-1-22485 | NS_000200.1    | + | 207156059 | 207156107 |
| Sma-1-22486 | NS_000200.1    | - | 44845255  | 44845207  |
| Sma-1-22487 | NW_003030440.1 | + | 36        | 84        |
| Sma-1-22488 | NW_003037827.1 | + | 2300732   | 2300780   |
| Sma-1-22489 | NS_000200.1    | + | 64922873  | 64922921  |
| Sma-1-22490 | NS_000200.1    | + | 362904643 | 362904691 |
| Sma-1-22491 | NW_003037916.1 | - | 299176    | 299128    |
| Sma-1-22492 | NW_003038015.1 | - | 781686    | 781638    |
| Sma-1-22493 | NS_000200.1    | - | 231105176 | 231105128 |
| Sma-1-22494 | NS_000200.1    | - | 163492587 | 163492539 |
| Sma-1-22495 | NW_003038200.1 | + | 5954      | 6002      |
| Sma-1-22496 | NS_000200.1    | + | 303605248 | 303605296 |
| Sma-1-22497 | NW_003037831.1 | + | 1198542   | 1198590   |
| Sma-1-22498 | NS_000200.1    | + | 70647844  | 70647892  |
| Sma-1-22499 | NW_003026512.1 | - | 104365    | 104317    |
| Sma-1-22500 | NS_000200.1    | - | 285198405 | 285198357 |
| Sma-1-22501 | NW_003037911.1 | + | 126091    | 126139    |
| Sma-1-22502 | NS_000200.1    | + | 155913444 | 155913492 |
| Sma-1-22503 | NW_003037852.1 | - | 182834    | 182786    |
| Sma-1-22504 | NS_000200.1    | - | 94574729  | 94574681  |
| Sma-1-22505 | NW_003038228.1 | - | 124542    | 124492    |
| Sma-1-22506 | NS_000200.1    | - | 310997822 | 310997772 |
| Sma-1-22507 | NW_003038261.1 | + | 207139    | 207187    |
| Sma-1-22508 | NS_000200.1    | + | 323820790 | 323820838 |
| Sma-1-22509 | NW_003038188.1 | - | 72965     | 72917     |
| Sma-1-22510 | NS_000200.1    | - | 302166708 | 302166660 |
| Sma-1-22511 | NW_003026517.1 | - | 670095    | 670047    |
| Sma-1-22512 | NS_000200.1    | - | 300276104 | 300276056 |
| Sma-1-22513 | NW_003036415.1 | + | 58        | 106       |
| Sma-1-22514 | NW_003037797.1 | + | 2660178   | 2660226   |
| Sma-1-22515 | NS_000200.1    | + | 13088038  | 13088086  |
| Sma-1-22516 | NS_000200.1    | + | 359923883 | 359923931 |
| Sma-1-22517 | NW_003037814.1 | - | 774978    | 774930    |
| Sma-1-22518 | NW_003037850.1 | + | 425920    | 425968    |
| Sma-1-22519 | NW_003037902.1 | - | 325427    | 325379    |
| Sma-1-22520 | NS_000200.1    | + | 92411950  | 92411998  |
| Sma-1-22521 | NS_000200.1    | - | 147080661 | 147080613 |
| Sma-1-22522 | NS_000200.1    | - | 43758838  | 43758790  |
| Sma-1-22523 | NW_003038261.1 | - | 191268    | 191220    |
| Sma-1-22524 | NS_000200.1    | - | 323804919 | 323804871 |

|             |                |   |           |           |
|-------------|----------------|---|-----------|-----------|
| Sma-1-22525 | NW_003037905.1 | + | 157697    | 157745    |
| Sma-1-22526 | NS_000200.1    | + | 149426709 | 149426757 |
| Sma-1-22527 | NW_003038078.1 | + | 37156     | 37204     |
| Sma-1-22528 | NS_000200.1    | + | 267243359 | 267243407 |
| Sma-1-22529 | NW_003038027.1 | - | 865943    | 865895    |
| Sma-1-22530 | NS_000200.1    | - | 241236657 | 241236609 |
| Sma-1-22531 | NW_003037791.1 | - | 479517    | 479469    |
| Sma-1-22532 | NS_000200.1    | - | 382184945 | 382184897 |
| Sma-1-22533 | NW_003037771.1 | - | 107918    | 107870    |
| Sma-1-22534 | NS_000200.1    | - | 378408824 | 378408776 |
| Sma-1-22535 | NW_003038145.1 | - | 134283    | 134235    |
| Sma-1-22536 | NS_000200.1    | - | 288745706 | 288745658 |
| Sma-1-22537 | NW_003026515.1 | - | 115595    | 115547    |
| Sma-1-22538 | NS_000200.1    | - | 290760006 | 290759958 |
| Sma-1-22539 | NW_003037830.1 | + | 1456202   | 1456250   |
| Sma-1-22540 | NS_000200.1    | + | 69346573  | 69346621  |
| Sma-1-22541 | NW_003034429.1 | - | 207       | 159       |
| Sma-1-22542 | NS_000200.1    | - | 346706778 | 346706730 |
| Sma-1-22543 | NW_003037831.1 | - | 1381245   | 1381197   |
| Sma-1-22544 | NS_000200.1    | - | 70830547  | 70830499  |
| Sma-1-22545 | NW_003037998.1 | - | 44765     | 44717     |
| Sma-1-22546 | NS_000200.1    | - | 221331361 | 221331313 |
| Sma-1-22547 | NW_003037847.1 | + | 989470    | 989518    |
| Sma-1-22548 | NS_000200.1    | + | 89641200  | 89641248  |
| Sma-1-22549 | NW_003029502.1 | - | 616       | 568       |
| Sma-1-22550 | NW_003038053.1 | - | 497788    | 497740    |
| Sma-1-22551 | NS_000200.1    | - | 362177382 | 362177334 |
| Sma-1-22552 | NS_000200.1    | - | 257857883 | 257857835 |
| Sma-1-22553 | NW_003037885.1 | + | 434704    | 434752    |
| Sma-1-22554 | NS_000200.1    | + | 128532651 | 128532699 |
| Sma-1-22555 | NW_003037878.1 | - | 411409    | 411361    |
| Sma-1-22556 | NW_003037900.1 | + | 126415    | 126463    |
| Sma-1-22557 | NS_000200.1    | + | 145255281 | 145255329 |
| Sma-1-22558 | NS_000200.1    | - | 122464887 | 122464839 |
| Sma-1-22559 | NW_003038503.1 | - | 53612     | 53564     |
| Sma-1-22560 | NS_000200.1    | - | 335579662 | 335579614 |
| Sma-1-22561 | NW_003035873.1 | + | 32637     | 32685     |
| Sma-1-22562 | NW_003037874.1 | + | 330350    | 330398    |
| Sma-1-22563 | NW_003037793.1 | + | 100213    | 100261    |
| Sma-1-22564 | NW_003037793.1 | + | 489546    | 489594    |
| Sma-1-22565 | NW_003037808.1 | - | 1621092   | 1621044   |
| Sma-1-22566 | NW_003037809.1 | + | 1402665   | 1402713   |
| Sma-1-22567 | NW_003037826.1 | - | 427793    | 427745    |
| Sma-1-22568 | NW_003037869.1 | - | 117549    | 117501    |
| Sma-1-22569 | NW_003037916.1 | - | 1023718   | 1023670   |
| Sma-1-22570 | NW_003037918.1 | + | 459149    | 459197    |
| Sma-1-22571 | NW_003037944.1 | + | 772467    | 772515    |
| Sma-1-22572 | NW_003037954.1 | + | 319       | 367       |
| Sma-1-22573 | NW_003038017.1 | + | 36631     | 36679     |
| Sma-1-22574 | NW_003038032.1 | + | 157883    | 157931    |
| Sma-1-22575 | NW_003038132.1 | - | 14061     | 14013     |
| Sma-1-22576 | NW_003038146.1 | - | 359176    | 359128    |

|             |                |   |           |           |
|-------------|----------------|---|-----------|-----------|
| Sma-1-22577 | NS_000200.1    | + | 100213    | 100261    |
| Sma-1-22578 | NS_000200.1    | + | 489546    | 489594    |
| Sma-1-22579 | NS_000200.1    | + | 35067129  | 35067177  |
| Sma-1-22580 | NS_000200.1    | + | 119755300 | 119755348 |
| Sma-1-22581 | NS_000200.1    | + | 167026139 | 167026187 |
| Sma-1-22582 | NS_000200.1    | + | 188993820 | 188993868 |
| Sma-1-22583 | NS_000200.1    | + | 193229941 | 193229989 |
| Sma-1-22584 | NS_000200.1    | + | 231802662 | 231802710 |
| Sma-1-22585 | NS_000200.1    | + | 245317043 | 245317091 |
| Sma-1-22586 | NS_000200.1    | + | 335793639 | 335793687 |
| Sma-1-22587 | NS_000200.1    | - | 289339846 | 289339798 |
| Sma-1-22588 | NS_000200.1    | - | 282434531 | 282434483 |
| Sma-1-22589 | NS_000200.1    | - | 164217129 | 164217081 |
| Sma-1-22590 | NS_000200.1    | - | 116589894 | 116589846 |
| Sma-1-22591 | NS_000200.1    | - | 61427309  | 61427261  |
| Sma-1-22592 | NS_000200.1    | - | 33407729  | 33407681  |
| Sma-1-22593 | NW_003038128.1 | + | 297371    | 297419    |
| Sma-1-22594 | NS_000200.1    | + | 281015659 | 281015707 |
| Sma-1-22595 | NW_003038083.1 | - | 234219    | 234171    |
| Sma-1-22596 | NS_000200.1    | - | 270477556 | 270477508 |
| Sma-1-22597 | NW_003034049.1 | - | 907       | 859       |
| Sma-1-22598 | NW_003038157.1 | + | 409357    | 409405    |
| Sma-1-22599 | NS_000200.1    | + | 295660277 | 295660325 |
| Sma-1-22600 | NS_000200.1    | - | 363608841 | 363608793 |
| Sma-1-22601 | NW_003037952.1 | - | 74284     | 74236     |
| Sma-1-22602 | NS_000200.1    | - | 192894417 | 192894369 |
| Sma-1-22603 | NW_003038518.1 | - | 69042     | 68994     |
| Sma-1-22604 | NS_000200.1    | - | 341705875 | 341705827 |
| Sma-1-22605 | NW_003039127.1 | + | 265664    | 265712    |
| Sma-1-22606 | NS_000200.1    | + | 113343163 | 113343211 |
| Sma-1-22607 | NW_003026516.1 | + | 313158    | 313206    |
| Sma-1-22608 | NS_000200.1    | + | 299421455 | 299421503 |
| Sma-1-22609 | NW_003038117.1 | + | 15631     | 15679     |
| Sma-1-22610 | NS_000200.1    | + | 277333456 | 277333504 |
| Sma-1-22611 | NW_003037943.1 | - | 819371    | 819323    |
| Sma-1-22612 | NS_000200.1    | - | 187840904 | 187840856 |
| Sma-1-22613 | NW_003037824.1 | + | 80116     | 80164     |
| Sma-1-22614 | NS_000200.1    | + | 57011056  | 57011104  |
| Sma-1-22615 | NW_003037906.1 | + | 670349    | 670397    |
| Sma-1-22616 | NS_000200.1    | + | 150978128 | 150978176 |
| Sma-1-22617 | NW_003038038.1 | + | 1228128   | 1228176   |
| Sma-1-22618 | NS_000200.1    | + | 253131521 | 253131569 |
| Sma-1-22619 | NW_003038246.1 | - | 130321    | 130273    |
| Sma-1-22620 | NS_000200.1    | - | 315771449 | 315771401 |
| Sma-1-22621 | NW_003037965.1 | - | 194748    | 194700    |
| Sma-1-22622 | NS_000200.1    | - | 198483833 | 198483785 |
| Sma-1-22623 | NW_003037908.1 | - | 58921     | 58873     |
| Sma-1-22624 | NS_000200.1    | - | 152532052 | 152532004 |
| Sma-1-22625 | NW_003038085.1 | + | 216668    | 216716    |
| Sma-1-22626 | NS_000200.1    | + | 271906761 | 271906809 |
| Sma-1-22627 | NW_003037792.1 | - | 12159     | 12111     |
| Sma-1-22628 | NS_000200.1    | - | 382449503 | 382449455 |

|             |                |   |           |           |
|-------------|----------------|---|-----------|-----------|
| Sma-1-22629 | NW_003037833.1 | - | 611715    | 611667    |
| Sma-1-22630 | NS_000200.1    | - | 72802811  | 72802763  |
| Sma-1-22631 | NW_003037836.1 | - | 752206    | 752158    |
| Sma-1-22632 | NS_000200.1    | - | 76309305  | 76309257  |
| Sma-1-22633 | NW_003039127.1 | - | 971674    | 971626    |
| Sma-1-22634 | NS_000200.1    | - | 114049173 | 114049125 |
| Sma-1-22635 | NW_003038037.1 | + | 254683    | 254731    |
| Sma-1-22636 | NS_000200.1    | + | 250410092 | 250410140 |
| Sma-1-22637 | NW_003038156.1 | + | 257877    | 257925    |
| Sma-1-22638 | NS_000200.1    | + | 294989990 | 294990038 |
| Sma-1-22639 | NW_003037829.1 | - | 1007315   | 1007267   |
| Sma-1-22640 | NS_000200.1    | - | 66907853  | 66907805  |
| Sma-1-22641 | NW_003038512.1 | - | 315235    | 315187    |
| Sma-1-22642 | NS_000200.1    | - | 338871932 | 338871884 |
| Sma-1-22643 | NW_003037852.1 | - | 121128    | 121080    |
| Sma-1-22644 | NS_000200.1    | - | 94513023  | 94512975  |
| Sma-1-22645 | NW_003037804.1 | - | 488188    | 488140    |
| Sma-1-22646 | NS_000200.1    | - | 25628208  | 25628160  |
| Sma-1-22647 | NW_003038026.1 | - | 651649    | 651601    |
| Sma-1-22648 | NS_000200.1    | - | 240159410 | 240159362 |
| Sma-1-22649 | NW_003038008.1 | - | 176784    | 176736    |
| Sma-1-22650 | NS_000200.1    | - | 225849880 | 225849832 |
| Sma-1-22651 | NW_003037868.1 | + | 208687    | 208735    |
| Sma-1-22652 | NS_000200.1    | + | 116180399 | 116180447 |
| Sma-1-22653 | NW_003037964.1 | + | 191242    | 191290    |
| Sma-1-22654 | NW_003037964.1 | + | 588381    | 588429    |
| Sma-1-22655 | NS_000200.1    | + | 197792764 | 197792812 |
| Sma-1-22656 | NS_000200.1    | + | 198189903 | 198189951 |
| Sma-1-22657 | NW_003037890.1 | - | 1166318   | 1166270   |
| Sma-1-22658 | NS_000200.1    | - | 136849679 | 136849631 |
| Sma-1-22659 | NW_003038041.1 | - | 127229    | 127181    |
| Sma-1-22660 | NS_000200.1    | - | 253794511 | 253794463 |
| Sma-1-22661 | NW_003037893.1 | + | 141799    | 141847    |
| Sma-1-22662 | NS_000200.1    | + | 141256109 | 141256157 |
| Sma-1-22663 | NW_003038161.1 | - | 47731     | 47683     |
| Sma-1-22664 | NS_000200.1    | - | 297417582 | 297417534 |
| Sma-1-22665 | NW_003037994.1 | - | 245487    | 245439    |
| Sma-1-22666 | NS_000200.1    | - | 218777301 | 218777253 |
| Sma-1-22667 | NW_003037888.1 | + | 488423    | 488471    |
| Sma-1-22668 | NS_000200.1    | + | 132696915 | 132696963 |
| Sma-1-22669 | NW_003038015.1 | - | 766991    | 766943    |
| Sma-1-22670 | NW_003038124.1 | - | 136751    | 136703    |
| Sma-1-22671 | NS_000200.1    | - | 279129395 | 279129347 |
| Sma-1-22672 | NS_000200.1    | - | 231090481 | 231090433 |
| Sma-1-22673 | NW_003038023.1 | - | 65033     | 64985     |
| Sma-1-22674 | NS_000200.1    | - | 237225324 | 237225276 |
| Sma-1-22675 | NW_003037896.1 | + | 163891    | 163939    |
| Sma-1-22676 | NS_000200.1    | + | 143084314 | 143084362 |
| Sma-1-22677 | NW_003038026.1 | + | 102209    | 102257    |
| Sma-1-22678 | NS_000200.1    | + | 239609970 | 239610018 |
| Sma-1-22679 | NW_003021195.1 | - | 1802      | 1754      |
| Sma-1-22680 | NW_003028402.1 | - | 443       | 395       |



|             |                |   |           |           |
|-------------|----------------|---|-----------|-----------|
| Sma-1-22681 | NW_003030241.1 | + | 653       | 701       |
| Sma-1-22682 | NW_003037793.1 | - | 2135442   | 2135394   |
| Sma-1-22683 | NW_003037813.1 | - | 299057    | 299009    |
| Sma-1-22684 | NW_003037821.1 | - | 265365    | 265317    |
| Sma-1-22685 | NW_003037840.1 | + | 688259    | 688307    |
| Sma-1-22686 | NW_003037849.1 | + | 259103    | 259151    |
| Sma-1-22687 | NW_003037849.1 | - | 247426    | 247378    |
| Sma-1-22688 | NW_003037973.1 | - | 380681    | 380633    |
| Sma-1-22689 | NW_003037989.1 | - | 18475     | 18427     |
| Sma-1-22690 | NW_003026574.1 | + | 116006    | 116054    |
| Sma-1-22691 | NW_003038125.1 | - | 61518     | 61470     |
| Sma-1-22692 | NW_003038147.1 | - | 250496    | 250448    |
| Sma-1-22693 | NS_000200.1    | + | 81311583  | 81311631  |
| Sma-1-22694 | NS_000200.1    | + | 91235376  | 91235424  |
| Sma-1-22695 | NS_000200.1    | + | 301923339 | 301923387 |
| Sma-1-22696 | NS_000200.1    | + | 362455255 | 362455303 |
| Sma-1-22697 | NS_000200.1    | - | 371556844 | 371556796 |
| Sma-1-22698 | NS_000200.1    | - | 369529708 | 369529660 |
| Sma-1-22699 | NS_000200.1    | - | 289778239 | 289778191 |
| Sma-1-22700 | NS_000200.1    | - | 279498474 | 279498426 |
| Sma-1-22701 | NS_000200.1    | - | 216629034 | 216628986 |
| Sma-1-22702 | NS_000200.1    | - | 204362408 | 204362360 |
| Sma-1-22703 | NS_000200.1    | - | 91223699  | 91223651  |
| Sma-1-22704 | NS_000200.1    | - | 53409849  | 53409801  |
| Sma-1-22705 | NS_000200.1    | - | 41285920  | 41285872  |
| Sma-1-22706 | NS_000200.1    | - | 2135442   | 2135394   |
| Sma-1-22707 | NW_003037995.1 | + | 248028    | 248076    |
| Sma-1-22708 | NW_003026490.1 | - | 477206    | 477158    |
| Sma-1-22709 | NS_000200.1    | + | 219937796 | 219937844 |
| Sma-1-22710 | NS_000200.1    | - | 268108922 | 268108874 |
| Sma-1-22711 | NW_003037837.1 | - | 1120478   | 1120430   |
| Sma-1-22712 | NS_000200.1    | - | 77926336  | 77926288  |
| Sma-1-22713 | NW_003038131.1 | + | 155608    | 155656    |
| Sma-1-22714 | NS_000200.1    | + | 282117452 | 282117500 |
| Sma-1-22715 | NW_003037793.1 | + | 625520    | 625568    |
| Sma-1-22716 | NS_000200.1    | + | 625520    | 625568    |
| Sma-1-22717 | NW_003037864.1 | + | 1272626   | 1272674   |
| Sma-1-22718 | NS_000200.1    | + | 109765200 | 109765248 |
| Sma-1-22719 | NW_003038251.1 | + | 474806    | 474854    |
| Sma-1-22720 | NS_000200.1    | + | 318806578 | 318806626 |
| Sma-1-22721 | NW_003037864.1 | - | 111675    | 111627    |
| Sma-1-22722 | NS_000200.1    | - | 108604249 | 108604201 |
| Sma-1-22723 | NW_003037866.1 | - | 1399171   | 1399123   |
| Sma-1-22724 | NS_000200.1    | - | 112886970 | 112886922 |
| Sma-1-22725 | NW_003038261.1 | - | 172893    | 172845    |
| Sma-1-22726 | NS_000200.1    | - | 323786544 | 323786496 |
| Sma-1-22727 | NW_003037792.1 | + | 556009    | 556057    |
| Sma-1-22728 | NW_003037792.1 | - | 496663    | 496615    |
| Sma-1-22729 | NW_003037863.1 | + | 191186    | 191234    |
| Sma-1-22730 | NW_003037865.1 | + | 651089    | 651137    |
| Sma-1-22731 | NW_003037902.1 | - | 431743    | 431695    |
| Sma-1-22732 | NW_003037906.1 | - | 50357     | 50309     |

|             |                |   |           |           |
|-------------|----------------|---|-----------|-----------|
| Sma-1-22733 | NW_003037992.1 | + | 328636    | 328684    |
| Sma-1-22734 | NS_000200.1    | + | 106949553 | 106949601 |
| Sma-1-22735 | NS_000200.1    | + | 111073008 | 111073056 |
| Sma-1-22736 | NS_000200.1    | + | 218170117 | 218170165 |
| Sma-1-22737 | NS_000200.1    | + | 382993353 | 382993401 |
| Sma-1-22738 | NS_000200.1    | - | 382934007 | 382933959 |
| Sma-1-22739 | NS_000200.1    | - | 150358136 | 150358088 |
| Sma-1-22740 | NS_000200.1    | - | 147186977 | 147186929 |
| Sma-1-22741 | NW_003037849.1 | - | 446097    | 446049    |
| Sma-1-22742 | NW_003037888.1 | + | 948006    | 948054    |
| Sma-1-22743 | NS_000200.1    | + | 133156498 | 133156546 |
| Sma-1-22744 | NS_000200.1    | - | 91422370  | 91422322  |
| Sma-1-22745 | NW_003037891.1 | + | 1403204   | 1403252   |
| Sma-1-22746 | NS_000200.1    | + | 139284482 | 139284530 |
| Sma-1-22747 | NW_003037851.1 | - | 608644    | 608596    |
| Sma-1-22748 | NS_000200.1    | - | 94011954  | 94011906  |
| Sma-1-22749 | NW_003037886.1 | + | 977512    | 977560    |
| Sma-1-22750 | NS_000200.1    | + | 130233079 | 130233127 |
| env-91      | AB231864.1     | + | 69209     | 69257     |
| Sma-1-22751 | NW_003029812.1 | - | 2552      | 2504      |
| Sma-1-22752 | NS_000200.1    | - | 376057522 | 376057474 |
| Sma-1-22753 | NW_003037993.1 | - | 52818     | 52770     |
| Sma-1-22754 | NS_000200.1    | - | 218239521 | 218239473 |
| Sma-1-22755 | NW_003035866.1 | + | 61148     | 61196     |
| Sma-1-22756 | NW_003038149.1 | - | 46809     | 46761     |
| Sma-1-22757 | NS_000200.1    | + | 334154958 | 334155006 |
| Sma-1-22758 | NS_000200.1    | - | 291075422 | 291075374 |
| Sma-1-22759 | NW_003037866.1 | - | 947943    | 947895    |
| Sma-1-22760 | NS_000200.1    | - | 112435742 | 112435694 |
| Sma-1-22761 | NW_003039127.1 | - | 284162    | 284114    |
| Sma-1-22762 | NS_000200.1    | - | 113361661 | 113361613 |
| Sma-1-22763 | NW_003037870.1 | + | 508846    | 508894    |
| Sma-1-22764 | NS_000200.1    | + | 117382511 | 117382559 |
| env-92      | AB231864.1     | + | 9996      | 10044     |
| Sma-1-22765 | NW_003026618.1 | + | 376299    | 376347    |
| Sma-1-22766 | NW_003037792.1 | + | 91314     | 91362     |
| Sma-1-22767 | NW_003037801.1 | - | 737938    | 737890    |
| Sma-1-22768 | NW_003037819.1 | - | 296058    | 296010    |
| Sma-1-22769 | NW_003037913.1 | + | 477565    | 477613    |
| Sma-1-22770 | NW_003037913.1 | + | 1465479   | 1465527   |
| Sma-1-22771 | NW_003037917.1 | + | 459808    | 459856    |
| Sma-1-22772 | NW_003037980.1 | + | 159432    | 159480    |
| Sma-1-22773 | NW_003038007.1 | - | 289826    | 289778    |
| Sma-1-22774 | NW_003038017.1 | + | 623177    | 623225    |
| Sma-1-22775 | NW_003038018.1 | - | 164425    | 164377    |
| Sma-1-22776 | NW_003038150.1 | + | 292851    | 292899    |
| Sma-1-22777 | NS_000200.1    | + | 159041316 | 159041364 |
| Sma-1-22778 | NS_000200.1    | + | 160029230 | 160029278 |
| Sma-1-22779 | NS_000200.1    | + | 165496612 | 165496660 |
| Sma-1-22780 | NS_000200.1    | + | 211120294 | 211120342 |
| Sma-1-22781 | NS_000200.1    | + | 232389208 | 232389256 |
| Sma-1-22782 | NS_000200.1    | + | 291771589 | 291771637 |

|             |                |   |           |           |
|-------------|----------------|---|-----------|-----------|
| Sma-1-22783 | NS_000200.1    | + | 322131301 | 322131349 |
| Sma-1-22784 | NS_000200.1    | + | 382528658 | 382528706 |
| Sma-1-22785 | NS_000200.1    | - | 232565275 | 232565227 |
| Sma-1-22786 | NS_000200.1    | - | 225538381 | 225538333 |
| Sma-1-22787 | NS_000200.1    | - | 51384323  | 51384275  |
| Sma-1-22788 | NS_000200.1    | - | 21827418  | 21827370  |
| Sma-1-22789 | NW_003038039.1 | - | 42478     | 42430     |
| Sma-1-22790 | NS_000200.1    | - | 253480324 | 253480276 |
| Sma-1-22791 | NW_003038161.1 | - | 410985    | 410937    |
| Sma-1-22792 | NS_000200.1    | - | 297780836 | 297780788 |
| Sma-1-22793 | NW_003038026.1 | + | 24378     | 24426     |
| Sma-1-22794 | NS_000200.1    | + | 239532139 | 239532187 |
| Sma-1-22795 | NW_003023005.1 | + | 2224      | 2272      |
| Sma-1-22796 | NW_003037888.1 | - | 877656    | 877608    |
| Sma-1-22797 | NS_000200.1    | + | 372037887 | 372037935 |
| Sma-1-22798 | NS_000200.1    | - | 133086148 | 133086100 |
| Sma-1-22799 | NW_003026517.1 | - | 596551    | 596503    |
| Sma-1-22800 | NS_000200.1    | - | 300202560 | 300202512 |
| Sma-1-22801 | NW_003031097.1 | + | 1556      | 1604      |
| Sma-1-22802 | NS_000200.1    | + | 325689280 | 325689328 |
| Sma-1-22803 | NW_003037766.1 | - | 27537     | 27489     |
| Sma-1-22804 | NS_000200.1    | - | 377998935 | 377998887 |
| Sma-1-22805 | NW_003037809.1 | + | 2231619   | 2231667   |
| Sma-1-22806 | NS_000200.1    | + | 35896083  | 35896131  |
| Sma-1-22807 | NW_003037793.1 | - | 3588785   | 3588737   |
| Sma-1-22808 | NS_000200.1    | - | 3588785   | 3588737   |
| Sma-1-22809 | NW_003037351.1 | - | 1741      | 1693      |
| Sma-1-22810 | NS_000200.1    | - | 366838221 | 366838173 |
| Sma-1-22811 | NW_003037837.1 | + | 409813    | 409861    |
| Sma-1-22812 | NS_000200.1    | + | 77215671  | 77215719  |
| Sma-1-22813 | NW_003038020.1 | - | 421662    | 421614    |
| Sma-1-22814 | NS_000200.1    | - | 234389006 | 234388958 |
| Sma-1-22815 | NW_003038153.1 | + | 474101    | 474149    |
| Sma-1-22816 | NS_000200.1    | + | 293536150 | 293536198 |
| Sma-1-22817 | NW_003038537.1 | - | 1709      | 1661      |
| Sma-1-22818 | NW_003039130.1 | - | 128793    | 128745    |
| Sma-1-22819 | NW_003037798.1 | - | 2484975   | 2484927   |
| Sma-1-22820 | NW_003037803.1 | + | 853212    | 853260    |
| Sma-1-22821 | NW_003038067.1 | + | 98354     | 98402     |
| Sma-1-22822 | NS_000200.1    | + | 24353749  | 24353797  |
| Sma-1-22823 | NS_000200.1    | + | 262952407 | 262952455 |
| Sma-1-22824 | NS_000200.1    | - | 343335721 | 343335673 |
| Sma-1-22825 | NS_000200.1    | - | 317803404 | 317803356 |
| Sma-1-22826 | NS_000200.1    | - | 16744133  | 16744085  |
| Sma-1-22827 | NW_003038261.1 | + | 576554    | 576602    |
| Sma-1-22828 | NW_003038261.1 | + | 577436    | 577484    |
| Sma-1-22829 | NS_000200.1    | + | 324190205 | 324190253 |
| Sma-1-22830 | NS_000200.1    | + | 324191087 | 324191135 |
| Sma-1-22831 | NW_003038033.1 | - | 102966    | 102918    |
| Sma-1-22832 | NS_000200.1    | - | 246082968 | 246082920 |
| Sma-1-22833 | NW_003026510.1 | + | 343553    | 343601    |
| Sma-1-22834 | NS_000200.1    | + | 283783734 | 283783782 |

|             |                |   |           |           |
|-------------|----------------|---|-----------|-----------|
| Sma-1-22835 | NW_003037795.1 | - | 1458110   | 1458062   |
| Sma-1-22836 | NS_000200.1    | - | 7848993   | 7848945   |
| Sma-1-22837 | NW_003037813.1 | + | 626435    | 626483    |
| Sma-1-22838 | NS_000200.1    | + | 41613298  | 41613346  |
| Sma-1-22839 | NW_003037929.1 | - | 36668     | 36620     |
| Sma-1-22840 | NW_003037804.1 | - | 1279303   | 1279255   |
| Sma-1-22841 | NW_003037826.1 | + | 71958     | 72006     |
| Sma-1-22842 | NW_003038141.1 | - | 228310    | 228262    |
| Sma-1-22843 | NS_000200.1    | + | 61071474  | 61071522  |
| Sma-1-22844 | NS_000200.1    | - | 287118289 | 287118241 |
| Sma-1-22845 | NS_000200.1    | - | 175277446 | 175277398 |
| Sma-1-22846 | NS_000200.1    | - | 26419323  | 26419275  |
| Sma-1-22847 | NW_003038228.1 | - | 101434    | 101386    |
| Sma-1-22848 | NS_000200.1    | - | 310974714 | 310974666 |
| Sma-1-22849 | NW_003037939.1 | + | 431030    | 431078    |
| Sma-1-22850 | NW_003038033.1 | - | 378510    | 378462    |
| Sma-1-22851 | NS_000200.1    | + | 183300784 | 183300832 |
| Sma-1-22852 | NS_000200.1    | - | 246358512 | 246358464 |
| Sma-1-22853 | NW_003037799.1 | + | 392791    | 392839    |
| Sma-1-22854 | NS_000200.1    | + | 17383145  | 17383193  |
| Sma-1-22855 | NW_003037840.1 | - | 937992    | 937944    |
| Sma-1-22856 | NS_000200.1    | - | 81561316  | 81561268  |
| Sma-1-22857 | NW_003038502.1 | - | 179893    | 179845    |
| Sma-1-22858 | NS_000200.1    | - | 335178938 | 335178890 |
| Sma-1-22859 | NW_003037863.1 | - | 981886    | 981838    |
| Sma-1-22860 | NS_000200.1    | - | 107740253 | 107740205 |
| Sma-1-22861 | NW_003038035.1 | + | 400322    | 400370    |
| Sma-1-22862 | NS_000200.1    | + | 248261814 | 248261862 |
| Sma-1-22863 | NW_003037890.1 | + | 1953714   | 1953762   |
| Sma-1-22864 | NS_000200.1    | + | 137637075 | 137637123 |
| Sma-1-22865 | NW_003037796.1 | - | 2179592   | 2179544   |
| Sma-1-22866 | NS_000200.1    | - | 10389236  | 10389188  |
| Sma-1-22867 | NW_003038240.1 | + | 299236    | 299284    |
| Sma-1-22868 | NS_000200.1    | + | 314438167 | 314438215 |
| Sma-1-22869 | NW_003038228.1 | + | 118623    | 118671    |
| Sma-1-22870 | NS_000200.1    | + | 310991903 | 310991951 |
| Sma-1-22871 | NW_003037918.1 | + | 1985815   | 1985863   |
| Sma-1-22872 | NS_000200.1    | + | 168552805 | 168552853 |
| Sma-1-22873 | NW_003037806.1 | - | 1810352   | 1810304   |
| Sma-1-22874 | NS_000200.1    | - | 30005566  | 30005518  |
| Sma-1-22875 | NW_003037918.1 | - | 1345837   | 1345789   |
| Sma-1-22876 | NS_000200.1    | - | 167912827 | 167912779 |
| Sma-1-22877 | NW_003037807.1 | - | 1167700   | 1167652   |
| Sma-1-22878 | NS_000200.1    | - | 31429216  | 31429168  |
| Sma-1-22879 | NW_003037805.1 | - | 1534118   | 1534070   |
| Sma-1-22880 | NS_000200.1    | - | 28091962  | 28091914  |
| Sma-1-22881 | NW_003037806.1 | - | 306291    | 306243    |
| Sma-1-22882 | NS_000200.1    | - | 28501505  | 28501457  |
| Sma-1-22883 | NW_003037806.1 | + | 345541    | 345589    |
| Sma-1-22884 | NS_000200.1    | + | 28540755  | 28540803  |
| Sma-1-22885 | NW_003037918.1 | - | 1046439   | 1046391   |
| Sma-1-22886 | NS_000200.1    | - | 167613429 | 167613381 |

|             |                |   |           |           |
|-------------|----------------|---|-----------|-----------|
| Sma-1-22887 | NW_003037917.1 | + | 825666    | 825714    |
| Sma-1-22888 | NS_000200.1    | + | 165862470 | 165862518 |
| Sma-1-22889 | NW_003037805.1 | - | 134710    | 134662    |
| Sma-1-22890 | NS_000200.1    | - | 26692554  | 26692506  |
| Sma-1-22891 | NW_003037809.1 | + | 795020    | 795068    |
| Sma-1-22892 | NS_000200.1    | + | 34459484  | 34459532  |
| Sma-1-22893 | NW_003037809.1 | - | 787227    | 787179    |
| Sma-1-22894 | NS_000200.1    | - | 34451691  | 34451643  |
| Sma-1-22895 | NW_003037801.1 | - | 869914    | 869866    |
| Sma-1-22896 | NS_000200.1    | - | 21959394  | 21959346  |
| Sma-1-22897 | NW_003037932.1 | - | 161335    | 161287    |
| Sma-1-22898 | NS_000200.1    | - | 177694531 | 177694483 |
| Sma-1-22899 | NW_003037810.1 | - | 1251332   | 1251284   |
| Sma-1-22900 | NW_003037894.1 | - | 364007    | 363959    |
| Sma-1-22901 | NS_000200.1    | - | 142260580 | 142260532 |
| Sma-1-22902 | NS_000200.1    | - | 37855854  | 37855806  |
| Sma-1-22903 | NW_003037800.1 | - | 1564469   | 1564421   |
| Sma-1-22904 | NW_003038028.1 | - | 305798    | 305750    |
| Sma-1-22905 | NW_003038037.1 | - | 1675572   | 1675524   |
| Sma-1-22906 | NW_003038153.1 | - | 15869     | 15821     |
| Sma-1-22907 | NS_000200.1    | - | 293077918 | 293077870 |
| Sma-1-22908 | NS_000200.1    | - | 251830981 | 251830933 |
| Sma-1-22909 | NS_000200.1    | - | 241613372 | 241613324 |
| Sma-1-22910 | NS_000200.1    | - | 20193829  | 20193781  |
| Sma-1-22911 | NW_003037807.1 | + | 384950    | 384998    |
| Sma-1-22912 | NS_000200.1    | + | 30646466  | 30646514  |
| Sma-1-22913 | NW_003037810.1 | - | 680085    | 680037    |
| Sma-1-22914 | NS_000200.1    | - | 37284607  | 37284559  |
| Sma-1-22915 | NW_003037888.1 | + | 1464171   | 1464219   |
| Sma-1-22916 | NW_003037888.1 | + | 1466858   | 1466906   |
| Sma-1-22917 | NS_000200.1    | + | 133672663 | 133672711 |
| Sma-1-22918 | NS_000200.1    | + | 133675350 | 133675398 |
| Sma-1-22919 | NW_003038218.1 | + | 148168    | 148216    |
| Sma-1-22920 | NS_000200.1    | + | 307588466 | 307588514 |
| Sma-1-22921 | NW_003037823.1 | - | 133957    | 133909    |
| Sma-1-22922 | NS_000200.1    | - | 56050576  | 56050528  |
| Sma-1-22923 | NW_003037827.1 | + | 2290154   | 2290202   |
| Sma-1-22924 | NS_000200.1    | + | 64912295  | 64912343  |
| Sma-1-22925 | NW_003037946.1 | - | 860791    | 860743    |
| Sma-1-22926 | NW_003038501.1 | + | 679       | 727       |
| Sma-1-22927 | NS_000200.1    | + | 334794731 | 334794779 |
| Sma-1-22928 | NS_000200.1    | - | 191554651 | 191554603 |
| Sma-1-22929 | NW_003037804.1 | - | 1361460   | 1361412   |
| Sma-1-22930 | NS_000200.1    | - | 26501480  | 26501432  |
| Sma-1-22931 | NW_003038026.1 | - | 773921    | 773873    |
| Sma-1-22932 | NS_000200.1    | - | 240281682 | 240281634 |
| Sma-1-22933 | NW_003026517.1 | + | 593694    | 593742    |
| Sma-1-22934 | NS_000200.1    | + | 300199703 | 300199751 |
| Sma-1-22935 | NW_003037917.1 | - | 264767    | 264719    |
| Sma-1-22936 | NS_000200.1    | - | 165301571 | 165301523 |
| Sma-1-22937 | NW_003037801.1 | + | 882099    | 882147    |
| Sma-1-22938 | NS_000200.1    | + | 21971579  | 21971627  |

|             |                |   |           |           |
|-------------|----------------|---|-----------|-----------|
| Sma-1-22939 | NW_003037925.1 | + | 331366    | 331414    |
| Sma-1-22940 | NS_000200.1    | + | 172733369 | 172733417 |
| Sma-1-22941 | NW_003037925.1 | - | 327615    | 327567    |
| Sma-1-22942 | NW_003037925.1 | - | 324143    | 324095    |
| Sma-1-22943 | NS_000200.1    | - | 172729618 | 172729570 |
| Sma-1-22944 | NS_000200.1    | - | 172726146 | 172726098 |
| Sma-1-22945 | NW_003038117.1 | + | 129716    | 129764    |
| Sma-1-22946 | NS_000200.1    | + | 277447541 | 277447589 |
| Sma-1-22947 | NW_003037953.1 | + | 155498    | 155546    |
| Sma-1-22948 | NS_000200.1    | + | 193068549 | 193068597 |
| Sma-1-22949 | NW_003038288.1 | + | 3073      | 3121      |
| Sma-1-22950 | NS_000200.1    | + | 325370375 | 325370423 |
| Sma-1-22951 | NW_003038033.1 | + | 892025    | 892073    |
| Sma-1-22952 | NS_000200.1    | + | 246872027 | 246872075 |
| Sma-1-22953 | NW_003037933.1 | - | 558928    | 558880    |
| Sma-1-22954 | NS_000200.1    | - | 178972100 | 178972052 |
| Sma-1-22955 | NW_003037838.1 | + | 274514    | 274562    |
| Sma-1-22956 | NS_000200.1    | + | 78273077  | 78273125  |
| Sma-1-22957 | NW_003038024.1 | - | 950569    | 950521    |
| Sma-1-22958 | NS_000200.1    | - | 238847598 | 238847550 |
| Sma-1-22959 | NW_003037807.1 | + | 983875    | 983920    |
| Sma-1-22960 | NS_000200.1    | + | 31245391  | 31245436  |
| Sma-1-22961 | NW_003037834.1 | + | 776446    | 776494    |
| Sma-1-22962 | NS_000200.1    | + | 73936932  | 73936980  |
| Sma-1-22963 | NW_003026456.1 | - | 572576    | 572528    |
| Sma-1-22964 | NS_000200.1    | - | 58495712  | 58495664  |
| Sma-1-22965 | NW_003039127.1 | - | 8335      | 8287      |
| Sma-1-22966 | NS_000200.1    | - | 113085834 | 113085786 |
| Sma-1-22967 | NW_003038255.1 | + | 273782    | 273830    |
| Sma-1-22968 | NS_000200.1    | + | 320662927 | 320662975 |
| Sma-1-22969 | NW_003037874.1 | - | 303112    | 303064    |
| Sma-1-22970 | NS_000200.1    | - | 119728062 | 119728014 |
| Sma-1-22971 | NW_003035241.1 | - | 224       | 176       |
| Sma-1-22972 | NS_000200.1    | - | 370865140 | 370865092 |
| Sma-1-22973 | NW_003037797.1 | - | 1906212   | 1906164   |
| Sma-1-22974 | NS_000200.1    | - | 12334072  | 12334024  |
| Sma-1-22975 | NW_003037796.1 | + | 153435    | 153483    |
| Sma-1-22976 | NS_000200.1    | + | 8363079   | 8363127   |
| Sma-1-22977 | NW_003037819.1 | - | 615824    | 615776    |
| Sma-1-22978 | NS_000200.1    | - | 51704089  | 51704041  |
| Sma-1-22979 | NW_003037821.1 | + | 464359    | 464407    |
| Sma-1-22980 | NS_000200.1    | + | 53608843  | 53608891  |
| Sma-1-22981 | NW_003037805.1 | + | 669095    | 669143    |
| Sma-1-22982 | NW_003037805.1 | + | 675311    | 675359    |
| Sma-1-22983 | NS_000200.1    | + | 27226939  | 27226987  |
| Sma-1-22984 | NS_000200.1    | + | 27233155  | 27233203  |
| Sma-1-22985 | NW_003037951.1 | + | 86655     | 86703     |
| Sma-1-22986 | NW_003037918.1 | + | 157287    | 157335    |
| Sma-1-22987 | NS_000200.1    | + | 166724277 | 166724325 |
| Sma-1-22988 | NS_000200.1    | + | 192764380 | 192764428 |
| Sma-1-22989 | NW_003026490.1 | - | 72396     | 72348     |
| Sma-1-22990 | NS_000200.1    | - | 267704112 | 267704064 |

|             |                |   |           |           |
|-------------|----------------|---|-----------|-----------|
| Sma-1-22991 | NW_003037838.1 | + | 672157    | 672205    |
| Sma-1-22992 | NS_000200.1    | + | 78670720  | 78670768  |
| Sma-1-22993 | NW_003038005.1 | - | 234425    | 234377    |
| Sma-1-22994 | NS_000200.1    | - | 224640379 | 224640331 |
| Sma-1-22995 | NW_003038014.1 | + | 292827    | 292875    |
| Sma-1-22996 | NS_000200.1    | + | 230033516 | 230033564 |
| Sma-1-22997 | NW_003022764.1 | + | 367       | 415       |
| Sma-1-22998 | NW_003037853.1 | - | 414647    | 414599    |
| Sma-1-22999 | NS_000200.1    | + | 368054518 | 368054566 |
| Sma-1-23000 | NS_000200.1    | - | 95906698  | 95906650  |
| Sma-1-23001 | NW_003037826.1 | + | 70433     | 70481     |
| Sma-1-23002 | NS_000200.1    | + | 61069949  | 61069997  |
| Sma-1-23003 | NW_003026611.1 | + | 161475    | 161523    |
| Sma-1-23004 | NS_000200.1    | + | 310731259 | 310731307 |
| Sma-1-23005 | NW_003037977.1 | + | 615454    | 615502    |
| Sma-1-23006 | NS_000200.1    | + | 208901474 | 208901522 |
| Sma-1-23007 | NW_003037834.1 | - | 405188    | 405140    |
| Sma-1-23008 | NW_003038086.1 | - | 254459    | 254411    |
| Sma-1-23009 | NS_000200.1    | - | 272503052 | 272503004 |
| Sma-1-23010 | NS_000200.1    | - | 73565674  | 73565626  |
| Sma-1-23011 | NW_003037891.1 | + | 1606362   | 1606410   |
| Sma-1-23012 | NS_000200.1    | + | 139487640 | 139487688 |
| Sma-1-23013 | NW_003037810.1 | - | 1479356   | 1479308   |
| Sma-1-23014 | NS_000200.1    | - | 38083878  | 38083830  |
| Sma-1-23015 | NW_003037861.1 | - | 66431     | 66383     |
| Sma-1-23016 | NW_003038041.1 | + | 54781     | 54829     |
| Sma-1-23017 | NS_000200.1    | + | 253722063 | 253722111 |
| Sma-1-23018 | NS_000200.1    | - | 104842885 | 104842837 |
| Sma-1-23019 | NW_003023171.1 | - | 1064      | 1016      |
| Sma-1-23020 | NW_003038043.1 | + | 48890     | 48938     |
| Sma-1-23021 | NS_000200.1    | + | 254358932 | 254358980 |
| Sma-1-23022 | NS_000200.1    | - | 368418992 | 368418944 |
| Sma-1-23023 | NW_003026466.1 | + | 107620    | 107668    |
| Sma-1-23024 | NS_000200.1    | + | 215374727 | 215374775 |
| Sma-1-23025 | NW_003037803.1 | + | 173463    | 173511    |
| Sma-1-23026 | NS_000200.1    | + | 23674000  | 23674048  |
| Sma-1-23027 | NW_003038257.1 | - | 434082    | 434034    |
| Sma-1-23028 | NW_003026486.1 | + | 203688    | 203736    |
| Sma-1-23029 | NS_000200.1    | + | 259824807 | 259824855 |
| Sma-1-23030 | NS_000200.1    | - | 321608410 | 321608362 |
| Sma-1-23031 | NW_003038011.1 | + | 26481     | 26529     |
| Sma-1-23032 | NW_003038029.1 | - | 88257     | 88209     |
| Sma-1-23033 | NS_000200.1    | + | 227554131 | 227554179 |
| Sma-1-23034 | NS_000200.1    | - | 242289158 | 242289110 |
| Sma-1-23035 | NW_003037801.1 | + | 619914    | 619962    |
| Sma-1-23036 | NS_000200.1    | + | 21709394  | 21709442  |
| Sma-1-23037 | NW_003037923.1 | - | 72618     | 72570     |
| Sma-1-23038 | NS_000200.1    | - | 171128831 | 171128783 |
| Sma-1-23039 | NW_003037800.1 | + | 1703903   | 1703951   |
| Sma-1-23040 | NS_000200.1    | + | 20333263  | 20333311  |
| Sma-1-23041 | NW_003037924.1 | - | 541738    | 541690    |
| Sma-1-23042 | NS_000200.1    | - | 172248696 | 172248648 |

|             |                |   |           |           |
|-------------|----------------|---|-----------|-----------|
| Sma-1-23043 | NW_003037809.1 | + | 2041852   | 2041900   |
| Sma-1-23044 | NW_003037812.1 | + | 510693    | 510741    |
| Sma-1-23045 | NS_000200.1    | + | 35706316  | 35706364  |
| Sma-1-23046 | NS_000200.1    | + | 39993432  | 39993480  |
| Sma-1-23047 | NW_003037935.1 | - | 277420    | 277372    |
| Sma-1-23048 | NW_003037976.1 | - | 127113    | 127065    |
| Sma-1-23049 | NS_000200.1    | - | 206741428 | 206741380 |
| Sma-1-23050 | NS_000200.1    | - | 179693955 | 179693907 |
| Sma-1-23051 | NW_003037945.1 | + | 552722    | 552770    |
| Sma-1-23052 | NS_000200.1    | + | 189654686 | 189654734 |
| Sma-1-23053 | NW_003037805.1 | - | 195623    | 195575    |
| Sma-1-23054 | NW_003038106.1 | - | 47696     | 47648     |
| Sma-1-23055 | NS_000200.1    | - | 275236461 | 275236413 |
| Sma-1-23056 | NS_000200.1    | - | 26753467  | 26753419  |
| Sma-1-23057 | NW_003037799.1 | + | 702255    | 702303    |
| Sma-1-23058 | NS_000200.1    | + | 17692609  | 17692657  |
| Sma-1-23059 | NW_003037867.1 | + | 111942    | 111990    |
| Sma-1-23060 | NS_000200.1    | + | 115712761 | 115712809 |
| Sma-1-23061 | NW_003037932.1 | + | 9471      | 9519      |
| Sma-1-23062 | NW_003038037.1 | + | 1701661   | 1701709   |
| Sma-1-23063 | NS_000200.1    | + | 177542667 | 177542715 |
| Sma-1-23064 | NS_000200.1    | + | 251857070 | 251857118 |
| Sma-1-23065 | NW_003037797.1 | + | 405350    | 405398    |
| Sma-1-23066 | NS_000200.1    | + | 10833210  | 10833258  |
| Sma-1-23067 | NW_003035880.1 | - | 53355     | 53307     |
| Sma-1-23068 | NS_000200.1    | - | 339294419 | 339294371 |
| Sma-1-23069 | NW_003037971.1 | - | 241594    | 241546    |
| Sma-1-23070 | NS_000200.1    | - | 201863644 | 201863596 |
| Sma-1-23071 | NW_003037862.1 | - | 55870     | 55822     |
| Sma-1-23072 | NW_003037909.1 | - | 19919     | 19871     |
| Sma-1-23073 | NW_003037981.1 | + | 573081    | 573129    |
| Sma-1-23074 | NS_000200.1    | + | 212970949 | 212970997 |
| Sma-1-23075 | NS_000200.1    | - | 153561568 | 153561520 |
| Sma-1-23076 | NS_000200.1    | - | 105707531 | 105707483 |
| Sma-1-23077 | NW_003038014.1 | + | 396522    | 396570    |
| Sma-1-23078 | NS_000200.1    | + | 230137211 | 230137259 |
| Sma-1-23079 | NW_003037797.1 | - | 304049    | 304001    |
| Sma-1-23080 | NS_000200.1    | - | 10731909  | 10731861  |
| Sma-1-23081 | NW_003037932.1 | + | 33218     | 33266     |
| Sma-1-23082 | NS_000200.1    | + | 177566414 | 177566462 |
| Sma-1-23083 | NW_003037797.1 | - | 281983    | 281935    |
| Sma-1-23084 | NS_000200.1    | - | 10709843  | 10709795  |
| Sma-1-23085 | NW_003037827.1 | - | 239854    | 239806    |
| Sma-1-23086 | NS_000200.1    | - | 62861995  | 62861947  |
| Sma-1-23087 | NW_003026510.1 | - | 33670     | 33622     |
| Sma-1-23088 | NS_000200.1    | - | 283473851 | 283473803 |
| Sma-1-23089 | NW_003037856.1 | + | 359174    | 359222    |
| Sma-1-23090 | NW_003037909.1 | + | 218412    | 218460    |
| Sma-1-23091 | NW_003037916.1 | + | 1794055   | 1794103   |
| Sma-1-23092 | NW_003037944.1 | + | 793980    | 794028    |
| Sma-1-23093 | NS_000200.1    | + | 99717130  | 99717178  |
| Sma-1-23094 | NS_000200.1    | + | 153760061 | 153760109 |



|             |                |   |           |           |
|-------------|----------------|---|-----------|-----------|
| Sma-1-23095 | NS.000200.1    | + | 164987466 | 164987514 |
| Sma-1-23096 | NS.000200.1    | + | 189015333 | 189015381 |
| Sma-1-23097 | NW_003038063.1 | - | 207178    | 207130    |
| Sma-1-23098 | NS.000200.1    | - | 261703456 | 261703408 |
| Sma-1-23099 | NW_003026472.1 | + | 207396    | 207444    |
| Sma-1-23100 | NS.000200.1    | + | 236619388 | 236619436 |
| Sma-1-23101 | NW_003037798.1 | + | 1231517   | 1231565   |
| Sma-1-23102 | NW_003037798.1 | + | 1240591   | 1240639   |
| Sma-1-23103 | NS.000200.1    | + | 15490675  | 15490723  |
| Sma-1-23104 | NS.000200.1    | + | 15499749  | 15499797  |
| Sma-1-23105 | NW_003037796.1 | - | 474957    | 474909    |
| Sma-1-23106 | NS.000200.1    | - | 8684601   | 8684553   |
| Sma-1-23107 | NW_003037811.1 | - | 1295659   | 1295611   |
| Sma-1-23108 | NW_003038025.1 | - | 1455      | 1407      |
| Sma-1-23109 | NS.000200.1    | - | 238859700 | 238859652 |
| Sma-1-23110 | NS.000200.1    | - | 39465901  | 39465853  |
| Sma-1-23111 | NW_003037817.1 | - | 450895    | 450847    |
| Sma-1-23112 | NW_003038025.1 | + | 167099    | 167147    |
| Sma-1-23113 | NS.000200.1    | + | 239025344 | 239025392 |
| Sma-1-23114 | NS.000200.1    | - | 47833247  | 47833199  |
| Sma-1-23115 | NW_003038163.1 | - | 93375     | 93327     |
| Sma-1-23116 | NS.000200.1    | - | 298493655 | 298493607 |
| Sma-1-23117 | NW_003037791.1 | + | 152108    | 152156    |
| Sma-1-23118 | NW_003037797.1 | - | 1984083   | 1984035   |
| Sma-1-23119 | NS.000200.1    | + | 381857536 | 381857584 |
| Sma-1-23120 | NS.000200.1    | - | 12411943  | 12411895  |
| Sma-1-23121 | NW_003037873.1 | - | 516623    | 516575    |
| Sma-1-23122 | NS.000200.1    | - | 119255751 | 119255703 |
| Sma-1-23123 | NW_003026611.1 | - | 112830    | 112782    |
| Sma-1-23124 | NS.000200.1    | - | 310682614 | 310682566 |
| Sma-1-23125 | NW_003026463.1 | - | 20899     | 20851     |
| Sma-1-23126 | NS.000200.1    | - | 198636269 | 198636221 |
| Sma-1-23127 | NW_003037941.1 | + | 162954    | 163002    |
| Sma-1-23128 | NS.000200.1    | + | 184897428 | 184897476 |
| Sma-1-23129 | NW_003038037.1 | - | 1650776   | 1650728   |
| Sma-1-23130 | NS.000200.1    | - | 251806185 | 251806137 |
| Sma-1-23131 | NW_003037792.1 | - | 205475    | 205427    |
| Sma-1-23132 | NS.000200.1    | - | 382642819 | 382642771 |
| Sma-1-23133 | NW_003026602.1 | - | 26169     | 26121     |
| Sma-1-23134 | NS.000200.1    | - | 306946152 | 306946104 |
| Sma-1-23135 | NW_003037962.1 | - | 358406    | 358358    |
| Sma-1-23136 | NW_003037794.1 | + | 1384057   | 1384105   |
| Sma-1-23137 | NS.000200.1    | + | 5563652   | 5563700   |
| Sma-1-23138 | NS.000200.1    | - | 196435249 | 196435201 |
| Sma-1-23139 | NW_003037829.1 | + | 1136118   | 1136166   |
| Sma-1-23140 | NS.000200.1    | + | 67036656  | 67036704  |
| Sma-1-23141 | NW_003037944.1 | + | 710703    | 710751    |
| Sma-1-23142 | NS.000200.1    | + | 188932056 | 188932104 |
| Sma-1-23143 | NW_003037941.1 | - | 897921    | 897873    |
| Sma-1-23144 | NS.000200.1    | - | 185632395 | 185632347 |
| Sma-1-23145 | NW_003037233.1 | - | 2031      | 1983      |
| Sma-1-23146 | NW_003037917.1 | + | 824598    | 824646    |

|             |                |   |           |           |
|-------------|----------------|---|-----------|-----------|
| Sma-1-23147 | NS_000200.1    | + | 165861402 | 165861450 |
| Sma-1-23148 | NS_000200.1    | - | 363944376 | 363944328 |
| Sma-1-23149 | NW_003037824.1 | + | 946140    | 946188    |
| Sma-1-23150 | NS_000200.1    | + | 57877080  | 57877128  |
| Sma-1-23151 | NW_003038086.1 | - | 678435    | 678387    |
| Sma-1-23152 | NS_000200.1    | - | 272927028 | 272926980 |
| Sma-1-23153 | NW_003038137.1 | - | 274477    | 274429    |
| Sma-1-23154 | NS_000200.1    | - | 285063373 | 285063325 |
| Sma-1-23155 | NW_003037953.1 | - | 177297    | 177249    |
| Sma-1-23156 | NS_000200.1    | - | 193090348 | 193090300 |
| Sma-1-23157 | NW_003037904.1 | - | 294814    | 294766    |
| Sma-1-23158 | NS_000200.1    | - | 149009313 | 149009265 |
| Sma-1-23159 | NW_003037848.1 | - | 349209    | 349161    |
| Sma-1-23160 | NS_000200.1    | - | 90042280  | 90042232  |
| Sma-1-23161 | NW_003038021.1 | + | 314017    | 314065    |
| Sma-1-23162 | NS_000200.1    | + | 235142592 | 235142640 |
| Sma-1-23163 | NW_003037825.1 | + | 581207    | 581255    |
| Sma-1-23164 | NW_003037852.1 | + | 765125    | 765173    |
| Sma-1-23165 | NW_003037970.1 | + | 339057    | 339105    |
| Sma-1-23166 | NS_000200.1    | + | 59710989  | 59711037  |
| Sma-1-23167 | NS_000200.1    | + | 95157020  | 95157068  |
| Sma-1-23168 | NS_000200.1    | + | 201395247 | 201395295 |
| Sma-1-23169 | NW_003037890.1 | + | 837272    | 837320    |
| Sma-1-23170 | NS_000200.1    | + | 136520633 | 136520681 |
| Sma-1-23171 | NW_003038399.1 | + | 3512      | 3560      |
| Sma-1-23172 | NS_000200.1    | + | 328168233 | 328168281 |
| Sma-1-23173 | NW_003037879.1 | - | 274735    | 274687    |
| Sma-1-23174 | NS_000200.1    | - | 123276991 | 123276943 |
| Sma-1-23175 | NW_003037925.1 | + | 364728    | 364776    |
| Sma-1-23176 | NS_000200.1    | + | 172766731 | 172766779 |
| Sma-1-23177 | NW_003037925.1 | - | 373584    | 373536    |
| Sma-1-23178 | NS_000200.1    | - | 172775587 | 172775539 |
| Sma-1-23179 | NW_003037982.1 | + | 231697    | 231745    |
| Sma-1-23180 | NS_000200.1    | + | 213890892 | 213890940 |
| Sma-1-23181 | NW_003038232.1 | - | 304494    | 304446    |
| Sma-1-23182 | NS_000200.1    | - | 312268285 | 312268237 |
| Sma-1-23183 | NW_003020742.1 | - | 2293      | 2245      |
| Sma-1-23184 | NS_000200.1    | - | 364364880 | 364364832 |
| Sma-1-23185 | NW_003038071.1 | + | 343086    | 343134    |
| Sma-1-23186 | NS_000200.1    | + | 265146129 | 265146177 |
| Sma-1-23187 | NW_003020747.1 | - | 2401      | 2353      |
| Sma-1-23188 | NW_003031243.1 | + | 598       | 646       |
| Sma-1-23189 | NW_003026465.1 | + | 780898    | 780946    |
| Sma-1-23190 | NW_003038487.1 | - | 41836     | 41788     |
| Sma-1-23191 | NW_003037793.1 | - | 1679539   | 1679491   |
| Sma-1-23192 | NW_003037826.1 | + | 642742    | 642790    |
| Sma-1-23193 | NW_003037828.1 | + | 255084    | 255132    |
| Sma-1-23194 | NW_003037840.1 | + | 253132    | 253180    |
| Sma-1-23195 | NW_003037854.1 | + | 1783080   | 1783128   |
| Sma-1-23196 | NW_003037942.1 | + | 9332      | 9380      |
| Sma-1-23197 | NW_003037942.1 | - | 5245      | 5197      |
| Sma-1-23198 | NW_003037976.1 | + | 541411    | 541459    |

|             |                |   |           |           |
|-------------|----------------|---|-----------|-----------|
| Sma-1-23199 | NW_003038003.1 | + | 68807     | 68855     |
| Sma-1-23200 | NW_003039127.1 | - | 1412020   | 1411972   |
| Sma-1-23201 | NW_003038059.1 | - | 256326    | 256278    |
| Sma-1-23202 | NW_003038066.1 | + | 114577    | 114625    |
| Sma-1-23203 | NS_000200.1    | + | 61642258  | 61642306  |
| Sma-1-23204 | NS_000200.1    | + | 65344569  | 65344617  |
| Sma-1-23205 | NS_000200.1    | + | 80876456  | 80876504  |
| Sma-1-23206 | NS_000200.1    | + | 98687501  | 98687549  |
| Sma-1-23207 | NS_000200.1    | + | 185769240 | 185769288 |
| Sma-1-23208 | NS_000200.1    | + | 207155726 | 207155774 |
| Sma-1-23209 | NS_000200.1    | + | 208173492 | 208173540 |
| Sma-1-23210 | NS_000200.1    | + | 223568089 | 223568137 |
| Sma-1-23211 | NS_000200.1    | + | 262583521 | 262583569 |
| Sma-1-23212 | NS_000200.1    | + | 345595862 | 345595910 |
| Sma-1-23213 | NS_000200.1    | - | 364373568 | 364373520 |
| Sma-1-23214 | NS_000200.1    | - | 333497623 | 333497575 |
| Sma-1-23215 | NS_000200.1    | - | 260498398 | 260498350 |
| Sma-1-23216 | NS_000200.1    | - | 185765153 | 185765105 |
| Sma-1-23217 | NS_000200.1    | - | 114489519 | 114489471 |
| Sma-1-23218 | NS_000200.1    | - | 1679539   | 1679491   |
| Sma-1-23219 | NW_003037933.1 | - | 68869     | 68821     |
| Sma-1-23220 | NS_000200.1    | - | 178482041 | 178481993 |
| Sma-1-23221 | NW_003037796.1 | - | 1762508   | 1762460   |
| Sma-1-23222 | NS_000200.1    | - | 9972152   | 9972104   |
| Sma-1-23223 | NW_003037912.1 | - | 1485070   | 1485022   |
| Sma-1-23224 | NS_000200.1    | - | 158296645 | 158296597 |
| Sma-1-23225 | NW_003037864.1 | + | 1128736   | 1128784   |
| Sma-1-23226 | NS_000200.1    | + | 109621310 | 109621358 |
| Sma-1-23227 | NW_003037512.1 | + | 977       | 1025      |
| Sma-1-23228 | NS_000200.1    | + | 370745091 | 370745139 |
| Sma-1-23229 | NW_003038003.1 | + | 71277     | 71325     |
| Sma-1-23230 | NS_000200.1    | + | 223570559 | 223570607 |
| Sma-1-23231 | NW_003038261.1 | - | 1054691   | 1054643   |
| Sma-1-23232 | NS_000200.1    | - | 324668342 | 324668294 |
| Sma-1-23233 | NW_003037886.1 | + | 1019687   | 1019735   |
| Sma-1-23234 | NS_000200.1    | + | 130275254 | 130275302 |
| Sma-1-23235 | NW_003037969.1 | + | 130684    | 130732    |
| Sma-1-23236 | NS_000200.1    | + | 200736811 | 200736859 |
| Sma-1-23237 | NW_003038079.1 | - | 305965    | 305917    |
| Sma-1-23238 | NS_000200.1    | - | 268435953 | 268435905 |
| Sma-1-23239 | NW_003037836.1 | + | 885105    | 885153    |
| Sma-1-23240 | NS_000200.1    | + | 76442204  | 76442252  |
| Sma-1-23241 | NW_003038030.1 | - | 103693    | 103645    |
| Sma-1-23242 | NS_000200.1    | - | 243239560 | 243239512 |
| Sma-1-23243 | NW_003037798.1 | + | 2198035   | 2198083   |
| Sma-1-23244 | NW_003037914.1 | + | 1732100   | 1732148   |
| Sma-1-23245 | NS_000200.1    | + | 16457193  | 16457241  |
| Sma-1-23246 | NS_000200.1    | + | 161876350 | 161876398 |
| Sma-1-23247 | NW_003037915.1 | - | 1283989   | 1283941   |
| Sma-1-23248 | NS_000200.1    | - | 163183975 | 163183927 |
| Sma-1-23249 | NW_003037937.1 | - | 113351    | 113303    |
| Sma-1-23250 | NS_000200.1    | - | 181313260 | 181313212 |

|             |                |   |           |           |
|-------------|----------------|---|-----------|-----------|
| Sma-1-23251 | NW_003038154.1 | + | 73238     | 73286     |
| Sma-1-23252 | NS_000200.1    | + | 293870947 | 293870995 |
| Sma-1-23253 | NW_003026502.1 | - | 73002     | 72954     |
| Sma-1-23254 | NW_003039127.1 | - | 829871    | 829823    |
| Sma-1-23255 | NS_000200.1    | - | 276109438 | 276109390 |
| Sma-1-23256 | NS_000200.1    | - | 113907370 | 113907322 |
| Sma-1-23257 | NW_003037937.1 | - | 238958    | 238910    |
| Sma-1-23258 | NS_000200.1    | - | 181438867 | 181438819 |
| Sma-1-23259 | NW_003037793.1 | + | 3318175   | 3318223   |
| Sma-1-23260 | NS_000200.1    | + | 3318175   | 3318223   |
| Sma-1-23261 | NW_003037827.1 | - | 779879    | 779831    |
| Sma-1-23262 | NS_000200.1    | - | 63402020  | 63401972  |
| Sma-1-23263 | NW_003037767.1 | - | 6652      | 6604      |
| Sma-1-23264 | NW_003037846.1 | + | 227395    | 227443    |
| Sma-1-23265 | NW_003037926.1 | - | 492617    | 492569    |
| Sma-1-23266 | NS_000200.1    | + | 87861965  | 87862013  |
| Sma-1-23267 | NS_000200.1    | - | 378054532 | 378054484 |
| Sma-1-23268 | NS_000200.1    | - | 173660887 | 173660839 |
| Sma-1-23269 | NW_003037814.1 | + | 1468219   | 1468267   |
| Sma-1-23270 | NS_000200.1    | + | 44452079  | 44452127  |
| Sma-1-23271 | NW_003037910.1 | - | 101978    | 101930    |
| Sma-1-23272 | NS_000200.1    | - | 154613953 | 154613905 |
| Sma-1-23273 | NW_003037793.1 | - | 1465713   | 1465665   |
| Sma-1-23274 | NS_000200.1    | - | 1465713   | 1465665   |
| Sma-1-23275 | NW_003037814.1 | - | 1799217   | 1799169   |
| Sma-1-23276 | NS_000200.1    | - | 44783077  | 44783029  |
| Sma-1-23277 | NW_003026472.1 | + | 280019    | 280067    |
| Sma-1-23278 | NS_000200.1    | + | 236692011 | 236692059 |
| Sma-1-23279 | NW_003037884.1 | + | 1298266   | 1298314   |
| Sma-1-23280 | NS_000200.1    | + | 128077931 | 128077979 |
| Sma-1-23281 | NW_003037798.1 | + | 2469685   | 2469733   |
| Sma-1-23282 | NS_000200.1    | + | 16728843  | 16728891  |
| Sma-1-23283 | NW_003037994.1 | + | 480077    | 480125    |
| Sma-1-23284 | NS_000200.1    | + | 219011891 | 219011939 |
| Sma-1-23285 | NW_003038006.1 | - | 59801     | 59753     |
| Sma-1-23286 | NS_000200.1    | - | 224944285 | 224944237 |
| Sma-1-23287 | NW_003037913.1 | - | 56108     | 56060     |
| Sma-1-23288 | NS_000200.1    | - | 158619859 | 158619811 |
| Sma-1-23289 | NW_003037854.1 | - | 665930    | 665882    |
| Sma-1-23290 | NS_000200.1    | - | 97570351  | 97570303  |
| Sma-1-23291 | NW_003038034.1 | + | 503062    | 503110    |
| Sma-1-23292 | NS_000200.1    | + | 247444818 | 247444866 |
| Sma-1-23293 | NW_003037784.1 | - | 21410     | 21362     |
| Sma-1-23294 | NW_003038008.1 | - | 174957    | 174909    |
| Sma-1-23295 | NS_000200.1    | - | 379850277 | 379850229 |
| Sma-1-23296 | NS_000200.1    | - | 225848053 | 225848005 |
| Sma-1-23297 | NW_003039127.1 | + | 1905346   | 1905394   |
| Sma-1-23298 | NS_000200.1    | + | 114982845 | 114982893 |
| Sma-1-23299 | NW_003038482.1 | + | 43640     | 43688     |
| Sma-1-23300 | NS_000200.1    | + | 333021091 | 333021139 |
| Sma-1-23301 | NW_003038516.1 | + | 197442    | 197490    |
| Sma-1-23302 | NS_000200.1    | + | 340685847 | 340685895 |

|             |                |   |           |           |
|-------------|----------------|---|-----------|-----------|
| Sma-1-23303 | NW_003037792.1 | - | 438280    | 438232    |
| Sma-1-23304 | NS_000200.1    | - | 382875624 | 382875576 |
| Sma-1-23305 | NW_003037816.1 | - | 39575     | 39527     |
| Sma-1-23306 | NS_000200.1    | - | 46248447  | 46248399  |
| Sma-1-23307 | NW_003026458.1 | - | 424546    | 424498    |
| Sma-1-23308 | NS_000200.1    | - | 102292776 | 102292728 |
| Sma-1-23309 | NW_003026485.1 | - | 180169    | 180121    |
| Sma-1-23310 | NS_000200.1    | - | 258535074 | 258535026 |
| Sma-1-23311 | NW_003037816.1 | + | 639677    | 639725    |
| Sma-1-23312 | NW_003037816.1 | + | 640749    | 640797    |
| Sma-1-23313 | NS_000200.1    | + | 46848549  | 46848597  |
| Sma-1-23314 | NS_000200.1    | + | 46849621  | 46849669  |
| Sma-1-23315 | NW_003037816.1 | - | 830102    | 830054    |
| Sma-1-23316 | NS_000200.1    | - | 47038974  | 47038926  |
| Sma-1-23317 | NW_003037791.1 | + | 52241     | 52289     |
| Sma-1-23318 | NW_003038064.1 | - | 174264    | 174216    |
| Sma-1-23319 | NS_000200.1    | + | 381757669 | 381757717 |
| Sma-1-23320 | NS_000200.1    | - | 262010841 | 262010793 |
| Sma-1-23321 | NW_003037791.1 | - | 324027    | 323979    |
| Sma-1-23322 | NS_000200.1    | - | 382029455 | 382029407 |
| Sma-1-23323 | NW_003037791.1 | + | 270702    | 270750    |
| Sma-1-23324 | NS_000200.1    | + | 381976130 | 381976178 |
| Sma-1-23325 | NW_003037817.1 | - | 390635    | 390587    |
| Sma-1-23326 | NW_003037964.1 | + | 514576    | 514624    |
| Sma-1-23327 | NW_003026508.1 | + | 161424    | 161472    |
| Sma-1-23328 | NW_003038124.1 | - | 251106    | 251058    |
| Sma-1-23329 | NS_000200.1    | + | 198116098 | 198116146 |
| Sma-1-23330 | NS_000200.1    | + | 281206038 | 281206086 |
| Sma-1-23331 | NS_000200.1    | - | 279243750 | 279243702 |
| Sma-1-23332 | NS_000200.1    | - | 47772987  | 47772939  |
| Sma-1-23333 | NW_003035866.1 | - | 20287     | 20239     |
| Sma-1-23334 | NS_000200.1    | - | 334114097 | 334114049 |
| Sma-1-23335 | NW_003037796.1 | - | 1723749   | 1723701   |
| Sma-1-23336 | NS_000200.1    | - | 9933393   | 9933345   |
| Sma-1-23337 | NW_003037940.1 | - | 129493    | 129445    |
| Sma-1-23338 | NS_000200.1    | - | 183871623 | 183871575 |
| Sma-1-23339 | NW_003037940.1 | - | 470963    | 470915    |
| Sma-1-23340 | NS_000200.1    | - | 184213093 | 184213045 |
| Sma-1-23341 | NW_003037771.1 | + | 92828     | 92876     |
| Sma-1-23342 | NS_000200.1    | + | 378393734 | 378393782 |
| Sma-1-23343 | NW_003037818.1 | - | 1767567   | 1767519   |
| Sma-1-23344 | NS_000200.1    | - | 50482974  | 50482926  |
| Sma-1-23345 | NW_003037940.1 | - | 848513    | 848465    |
| Sma-1-23346 | NS_000200.1    | - | 184590643 | 184590595 |
| Sma-1-23347 | NW_003037818.1 | + | 2069814   | 2069862   |
| Sma-1-23348 | NS_000200.1    | + | 50785221  | 50785269  |
| Sma-1-23349 | NW_003037838.1 | - | 663772    | 663724    |
| Sma-1-23350 | NS_000200.1    | - | 78662335  | 78662287  |
| Sma-1-23351 | NW_003031752.1 | + | 606       | 654       |
| Sma-1-23352 | NW_003031752.1 | + | 960       | 1008      |
| Sma-1-23353 | NS_000200.1    | + | 366945569 | 366945617 |
| Sma-1-23354 | NS_000200.1    | + | 366945923 | 366945971 |

|             |                |   |           |           |
|-------------|----------------|---|-----------|-----------|
| Sma-1-23355 | NW_003035880.1 | - | 282339    | 282291    |
| Sma-1-23356 | NS_000200.1    | - | 339523403 | 339523355 |
| Sma-1-23357 | NW_003038063.1 | - | 106883    | 106835    |
| Sma-1-23358 | NS_000200.1    | - | 261603161 | 261603113 |
| Sma-1-23359 | NW_003037916.1 | - | 1833814   | 1833766   |
| Sma-1-23360 | NS_000200.1    | - | 165027225 | 165027177 |
| Sma-1-23361 | NW_003037976.1 | - | 385317    | 385269    |
| Sma-1-23362 | NS_000200.1    | - | 206999632 | 206999584 |
| Sma-1-23363 | NW_003037718.1 | - | 2600      | 2552      |
| Sma-1-23364 | NS_000200.1    | - | 376195208 | 376195160 |
| Sma-1-23365 | NW_003037942.1 | - | 357922    | 357874    |
| Sma-1-23366 | NS_000200.1    | - | 186117830 | 186117782 |
| Sma-1-23367 | NW_003037942.1 | + | 454007    | 454055    |
| Sma-1-23368 | NS_000200.1    | + | 186213915 | 186213963 |
| Sma-1-23369 | NW_003038512.1 | - | 327924    | 327876    |
| Sma-1-23370 | NS_000200.1    | - | 338884621 | 338884573 |
| Sma-1-23371 | NW_003037967.1 | + | 543384    | 543432    |
| Sma-1-23372 | NS_000200.1    | + | 199783355 | 199783403 |
| Sma-1-23373 | NW_003037962.1 | - | 181608    | 181560    |
| Sma-1-23374 | NW_003037883.1 | + | 306779    | 306827    |
| Sma-1-23375 | NS_000200.1    | + | 126370502 | 126370550 |
| Sma-1-23376 | NS_000200.1    | - | 196258451 | 196258403 |
| Sma-1-23377 | NW_003037796.1 | + | 1781190   | 1781238   |
| Sma-1-23378 | NS_000200.1    | + | 9990834   | 9990882   |
| Sma-1-23379 | NW_003035876.1 | + | 54407     | 54455     |
| Sma-1-23380 | NW_003037885.1 | - | 198773    | 198725    |
| Sma-1-23381 | NW_003037891.1 | + | 2572164   | 2572212   |
| Sma-1-23382 | NW_003037891.1 | - | 1479813   | 1479765   |
| Sma-1-23383 | NW_003037964.1 | - | 85976     | 85928     |
| Sma-1-23384 | NS_000200.1    | + | 140453442 | 140453490 |
| Sma-1-23385 | NS_000200.1    | + | 336885907 | 336885955 |
| Sma-1-23386 | NS_000200.1    | - | 197687498 | 197687450 |
| Sma-1-23387 | NS_000200.1    | - | 139361091 | 139361043 |
| Sma-1-23388 | NS_000200.1    | - | 128296720 | 128296672 |
| Sma-1-23389 | NW_003037819.1 | - | 701980    | 701932    |
| Sma-1-23390 | NW_003037922.1 | + | 133288    | 133336    |
| Sma-1-23391 | NS_000200.1    | + | 170057285 | 170057333 |
| Sma-1-23392 | NS_000200.1    | - | 51790245  | 51790197  |
| Sma-1-23393 | NW_003037819.1 | - | 980304    | 980256    |
| Sma-1-23394 | NS_000200.1    | - | 52068569  | 52068521  |
| Sma-1-23395 | NW_003037820.1 | + | 182808    | 182856    |
| Sma-1-23396 | NS_000200.1    | + | 52455790  | 52455838  |
| Sma-1-23397 | NW_003035154.1 | - | 1518      | 1470      |
| Sma-1-23398 | NW_003037995.1 | + | 303010    | 303058    |
| Sma-1-23399 | NS_000200.1    | + | 219992778 | 219992826 |
| Sma-1-23400 | NS_000200.1    | - | 370698688 | 370698640 |
| Sma-1-23401 | NW_003037948.1 | - | 98256     | 98208     |
| Sma-1-23402 | NW_003038063.1 | - | 241627    | 241579    |
| Sma-1-23403 | NS_000200.1    | - | 261737905 | 261737857 |
| Sma-1-23404 | NS_000200.1    | - | 192118200 | 192118152 |
| Sma-1-23405 | NW_003026474.1 | + | 90768     | 90816     |
| Sma-1-23406 | NS_000200.1    | + | 253289343 | 253289391 |

|             |                |   |           |           |
|-------------|----------------|---|-----------|-----------|
| Sma-1-23407 | NW_003026611.1 | + | 267644    | 267692    |
| Sma-1-23408 | NS_000200.1    | + | 310837428 | 310837476 |
| Sma-1-23409 | NW_003038518.1 | + | 559987    | 560035    |
| Sma-1-23410 | NS_000200.1    | + | 342196820 | 342196868 |
| Sma-1-23411 | NW_003037822.1 | + | 1031676   | 1031724   |
| Sma-1-23412 | NS_000200.1    | + | 55339682  | 55339730  |
| Sma-1-23413 | NW_003037824.1 | - | 856764    | 856716    |
| Sma-1-23414 | NS_000200.1    | - | 57787704  | 57787656  |
| Sma-1-23415 | NW_003037890.1 | + | 283007    | 283055    |
| Sma-1-23416 | NS_000200.1    | + | 135966368 | 135966416 |
| Sma-1-23417 | NW_003026722.1 | - | 16223     | 16175     |
| Sma-1-23418 | NS_000200.1    | - | 325427486 | 325427438 |
| Sma-1-23419 | NW_003038038.1 | - | 524142    | 524094    |
| Sma-1-23420 | NS_000200.1    | - | 252427535 | 252427487 |
| Sma-1-23421 | NW_003039127.1 | - | 369906    | 369858    |
| Sma-1-23422 | NS_000200.1    | - | 113447405 | 113447357 |
| Sma-1-23423 | NW_003032266.1 | + | 51362     | 51410     |
| Sma-1-23424 | NW_003037827.1 | + | 2328678   | 2328726   |
| Sma-1-23425 | NW_003037923.1 | - | 372889    | 372841    |
| Sma-1-23426 | NS_000200.1    | + | 64950819  | 64950867  |
| Sma-1-23427 | NS_000200.1    | + | 358242109 | 358242157 |
| Sma-1-23428 | NS_000200.1    | - | 171429102 | 171429054 |
| Sma-1-23429 | NW_003037822.1 | - | 374647    | 374599    |
| Sma-1-23430 | NS_000200.1    | - | 54682653  | 54682605  |
| Sma-1-23431 | NW_003037964.1 | + | 412008    | 412056    |
| Sma-1-23432 | NS_000200.1    | + | 198013530 | 198013578 |
| Sma-1-23433 | NW_003028808.1 | + | 1977      | 2025      |
| Sma-1-23434 | NS_000200.1    | + | 369977789 | 369977837 |
| Sma-1-23435 | NW_003037825.1 | + | 48129     | 48177     |
| Sma-1-23436 | NS_000200.1    | + | 59177911  | 59177959  |
| Sma-1-23437 | NW_003037798.1 | + | 1567789   | 1567837   |
| Sma-1-23438 | NW_003037909.1 | - | 427476    | 427428    |
| Sma-1-23439 | NW_003038149.1 | - | 80316     | 80268     |
| Sma-1-23440 | NS_000200.1    | + | 15826947  | 15826995  |
| Sma-1-23441 | NS_000200.1    | - | 291108929 | 291108881 |
| Sma-1-23442 | NS_000200.1    | - | 153969125 | 153969077 |
| Sma-1-23443 | NW_003037967.1 | + | 528560    | 528608    |
| Sma-1-23444 | NS_000200.1    | + | 199768531 | 199768579 |
| Sma-1-23445 | NW_003028269.1 | - | 307       | 259       |
| Sma-1-23446 | NS_000200.1    | - | 374433989 | 374433941 |
| Sma-1-23447 | NW_003022291.1 | - | 1478      | 1430      |
| Sma-1-23448 | NS_000200.1    | - | 361111834 | 361111786 |
| Sma-1-23449 | NW_003029166.1 | + | 850       | 898       |
| Sma-1-23450 | NW_003037819.1 | + | 1057639   | 1057687   |
| Sma-1-23451 | NW_003037997.1 | - | 456291    | 456243    |
| Sma-1-23452 | NS_000200.1    | + | 52145904  | 52145952  |
| Sma-1-23453 | NS_000200.1    | + | 357014642 | 357014690 |
| Sma-1-23454 | NS_000200.1    | - | 221267733 | 221267685 |
| Sma-1-23455 | NW_003037848.1 | - | 156027    | 155979    |
| Sma-1-23456 | NS_000200.1    | - | 89849098  | 89849050  |
| Sma-1-23457 | NW_003038025.1 | - | 403161    | 403113    |
| Sma-1-23458 | NS_000200.1    | - | 239261406 | 239261358 |

|             |                |   |           |           |
|-------------|----------------|---|-----------|-----------|
| Sma-1-23459 | NW_003038514.1 | - | 302712    | 302664    |
| Sma-1-23460 | NS_000200.1    | - | 339927251 | 339927203 |
| Sma-1-23461 | NW_003038510.1 | - | 19570     | 19522     |
| Sma-1-23462 | NS_000200.1    | - | 338301196 | 338301148 |
| Sma-1-23463 | NW_003023368.1 | - | 1919      | 1871      |
| Sma-1-23464 | NW_003037905.1 | + | 1009775   | 1009823   |
| Sma-1-23465 | NS_000200.1    | + | 150278787 | 150278835 |
| Sma-1-23466 | NS_000200.1    | - | 373150207 | 373150159 |
| Sma-1-23467 | NW_003038067.1 | + | 103592    | 103640    |
| Sma-1-23468 | NW_003038067.1 | - | 103251    | 103203    |
| Sma-1-23469 | NS_000200.1    | + | 262957645 | 262957693 |
| Sma-1-23470 | NS_000200.1    | - | 262957304 | 262957256 |
| Sma-1-23471 | NW_003037979.1 | + | 354214    | 354262    |
| Sma-1-23472 | NS_000200.1    | + | 210415234 | 210415282 |
| Sma-1-23473 | NW_003037937.1 | - | 756378    | 756330    |
| Sma-1-23474 | NS_000200.1    | - | 181956287 | 181956239 |
| Sma-1-23475 | NW_003026458.1 | - | 677854    | 677806    |
| Sma-1-23476 | NS_000200.1    | - | 102546084 | 102546036 |
| Sma-1-23477 | NW_003037980.1 | + | 924651    | 924699    |
| Sma-1-23478 | NS_000200.1    | + | 211885513 | 211885561 |
| Sma-1-23479 | NW_003037865.1 | + | 738073    | 738121    |
| Sma-1-23480 | NS_000200.1    | + | 111159992 | 111160040 |
| Sma-1-23481 | NW_003037808.1 | + | 682517    | 682565    |
| Sma-1-23482 | NS_000200.1    | + | 32469154  | 32469202  |
| Sma-1-23483 | NW_003037836.1 | + | 251976    | 252024    |
| Sma-1-23484 | NW_003037914.1 | - | 479005    | 478957    |
| Sma-1-23485 | NW_003038515.1 | + | 182022    | 182070    |
| Sma-1-23486 | NS_000200.1    | + | 75809075  | 75809123  |
| Sma-1-23487 | NS_000200.1    | + | 340266087 | 340266135 |
| Sma-1-23488 | NS_000200.1    | - | 160623255 | 160623207 |
| Sma-1-23489 | NW_003038073.1 | - | 339791    | 339743    |
| Sma-1-23490 | NW_003037890.1 | + | 1353189   | 1353237   |
| Sma-1-23491 | NS_000200.1    | + | 137036550 | 137036598 |
| Sma-1-23492 | NS_000200.1    | - | 265862224 | 265862176 |
| Sma-1-23493 | NW_003037867.1 | + | 366300    | 366348    |
| Sma-1-23494 | NW_003037913.1 | - | 1372147   | 1372099   |
| Sma-1-23495 | NS_000200.1    | + | 115967119 | 115967167 |
| Sma-1-23496 | NS_000200.1    | - | 159935898 | 159935850 |
| Sma-1-23497 | NW_003037882.1 | - | 611812    | 611764    |
| Sma-1-23498 | NS_000200.1    | - | 125903486 | 125903438 |
| Sma-1-23499 | NW_003037808.1 | - | 1550641   | 1550593   |
| Sma-1-23500 | NS_000200.1    | - | 33337278  | 33337230  |
| Sma-1-23501 | NW_003038150.1 | - | 291534    | 291486    |
| Sma-1-23502 | NS_000200.1    | - | 291770272 | 291770224 |
| Sma-1-23503 | NW_003038010.1 | + | 657237    | 657285    |
| Sma-1-23504 | NW_003038065.1 | + | 31360     | 31408     |
| Sma-1-23505 | NS_000200.1    | + | 227475460 | 227475508 |
| Sma-1-23506 | NS_000200.1    | + | 262182977 | 262183025 |
| Sma-1-23507 | NW_003037997.1 | + | 89219     | 89267     |
| Sma-1-23508 | NS_000200.1    | + | 220900661 | 220900709 |
| Sma-1-23509 | NW_003037841.1 | + | 460017    | 460065    |
| Sma-1-23510 | NW_003037864.1 | - | 695880    | 695832    |



|             |                |   |           |           |
|-------------|----------------|---|-----------|-----------|
| Sma-1-23511 | NS_000200.1    | + | 83071198  | 83071246  |
| Sma-1-23512 | NS_000200.1    | - | 109188454 | 109188406 |
| Sma-1-23513 | NW_003037847.1 | + | 1011363   | 1011411   |
| Sma-1-23514 | NS_000200.1    | + | 89663093  | 89663141  |
| Sma-1-23515 | NW_003037890.1 | + | 1603837   | 1603885   |
| Sma-1-23516 | NS_000200.1    | + | 137287198 | 137287246 |
| Sma-1-23517 | NW_003037909.1 | + | 903456    | 903504    |
| Sma-1-23518 | NS_000200.1    | + | 154445105 | 154445153 |
| Sma-1-23519 | NW_003038132.1 | - | 132753    | 132705    |
| Sma-1-23520 | NS_000200.1    | - | 282553223 | 282553175 |
| Sma-1-23521 | NW_003038034.1 | - | 388008    | 387960    |
| Sma-1-23522 | NS_000200.1    | - | 247329764 | 247329716 |
| Sma-1-23523 | NW_003030134.1 | - | 223       | 175       |
| Sma-1-23524 | NW_003038250.1 | - | 228356    | 228308    |
| Sma-1-23525 | NW_003026456.1 | + | 831657    | 831705    |
| Sma-1-23526 | NW_003037792.1 | - | 220096    | 220048    |
| Sma-1-23527 | NW_003037792.1 | - | 214048    | 214000    |
| Sma-1-23528 | NW_003037852.1 | + | 128721    | 128769    |
| Sma-1-23529 | NW_003037865.1 | + | 229118    | 229166    |
| Sma-1-23530 | NW_003037885.1 | - | 806291    | 806243    |
| Sma-1-23531 | NW_003037895.1 | - | 258952    | 258904    |
| Sma-1-23532 | NW_003037901.1 | + | 457595    | 457643    |
| Sma-1-23533 | NW_003037994.1 | + | 451059    | 451107    |
| Sma-1-23534 | NW_003038515.1 | + | 197358    | 197406    |
| Sma-1-23535 | NS_000200.1    | + | 58754793  | 58754841  |
| Sma-1-23536 | NS_000200.1    | + | 94520616  | 94520664  |
| Sma-1-23537 | NS_000200.1    | + | 110651037 | 110651085 |
| Sma-1-23538 | NS_000200.1    | + | 146306056 | 146306104 |
| Sma-1-23539 | NS_000200.1    | + | 218982873 | 218982921 |
| Sma-1-23540 | NS_000200.1    | + | 340281423 | 340281471 |
| Sma-1-23541 | NS_000200.1    | - | 382657440 | 382657392 |
| Sma-1-23542 | NS_000200.1    | - | 382651392 | 382651344 |
| Sma-1-23543 | NS_000200.1    | - | 357658742 | 357658694 |
| Sma-1-23544 | NS_000200.1    | - | 318281033 | 318280985 |
| Sma-1-23545 | NS_000200.1    | - | 142705154 | 142705106 |
| Sma-1-23546 | NS_000200.1    | - | 128904238 | 128904190 |
| Sma-1-23547 | NW_003037853.1 | - | 756583    | 756535    |
| Sma-1-23548 | NS_000200.1    | - | 96248634  | 96248586  |
| Sma-1-23549 | NW_003037855.1 | + | 343435    | 343483    |
| Sma-1-23550 | NW_003038495.1 | - | 15236     | 15188     |
| Sma-1-23551 | NS_000200.1    | + | 99208185  | 99208233  |
| Sma-1-23552 | NS_000200.1    | - | 334268456 | 334268408 |
| Sma-1-23553 | NW_003037795.1 | - | 1700508   | 1700460   |
| Sma-1-23554 | NW_003037803.1 | + | 1405568   | 1405616   |
| Sma-1-23555 | NW_003037848.1 | + | 764965    | 765013    |
| Sma-1-23556 | NW_003037864.1 | - | 46277     | 46229     |
| Sma-1-23557 | NW_003037918.1 | + | 934677    | 934725    |
| Sma-1-23558 | NW_003037918.1 | - | 934461    | 934413    |
| Sma-1-23559 | NW_003037979.1 | + | 879738    | 879786    |
| Sma-1-23560 | NW_003037979.1 | + | 880071    | 880119    |
| Sma-1-23561 | NW_003037979.1 | - | 879626    | 879578    |
| Sma-1-23562 | NW_003038030.1 | + | 133370    | 133418    |

|             |                |   |           |           |
|-------------|----------------|---|-----------|-----------|
| Sma-1-23563 | NW_003038241.1 | - | 160020    | 159972    |
| Sma-1-23564 | NW_003038259.1 | + | 72882     | 72930     |
| Sma-1-23565 | NW_003026517.1 | + | 247443    | 247491    |
| Sma-1-23566 | NW_003038193.1 | + | 13112     | 13160     |
| Sma-1-23567 | NS_000200.1    | + | 24906105  | 24906153  |
| Sma-1-23568 | NS_000200.1    | + | 90458036  | 90458084  |
| Sma-1-23569 | NS_000200.1    | + | 167501667 | 167501715 |
| Sma-1-23570 | NS_000200.1    | + | 210940758 | 210940806 |
| Sma-1-23571 | NS_000200.1    | + | 210941091 | 210941139 |
| Sma-1-23572 | NS_000200.1    | + | 243269237 | 243269285 |
| Sma-1-23573 | NS_000200.1    | + | 299853452 | 299853500 |
| Sma-1-23574 | NS_000200.1    | + | 302892992 | 302893040 |
| Sma-1-23575 | NS_000200.1    | + | 322933481 | 322933529 |
| Sma-1-23576 | NS_000200.1    | - | 314622725 | 314622677 |
| Sma-1-23577 | NS_000200.1    | - | 210940646 | 210940598 |
| Sma-1-23578 | NS_000200.1    | - | 167501451 | 167501403 |
| Sma-1-23579 | NS_000200.1    | - | 108538851 | 108538803 |
| Sma-1-23580 | NS_000200.1    | - | 8091391   | 8091343   |
| Sma-1-23581 | NW_003038012.1 | - | 366150    | 366102    |
| Sma-1-23582 | NW_003026508.1 | + | 53355     | 53403     |
| Sma-1-23583 | NS_000200.1    | + | 281097969 | 281098017 |
| Sma-1-23584 | NS_000200.1    | - | 228690089 | 228690041 |
| Sma-1-23585 | NW_003037975.1 | + | 66173     | 66221     |
| Sma-1-23586 | NW_003037975.1 | + | 66798     | 66846     |
| Sma-1-23587 | NS_000200.1    | + | 205648397 | 205648445 |
| Sma-1-23588 | NS_000200.1    | + | 205649022 | 205649070 |
| Sma-1-23589 | NW_003037829.1 | + | 127926    | 127974    |
| Sma-1-23590 | NW_003038012.1 | - | 536256    | 536208    |
| Sma-1-23591 | NS_000200.1    | + | 66028464  | 66028512  |
| Sma-1-23592 | NS_000200.1    | - | 228860195 | 228860147 |
| Sma-1-23593 | NW_003037906.1 | + | 517753    | 517801    |
| Sma-1-23594 | NS_000200.1    | + | 150825532 | 150825580 |
| Sma-1-23595 | NW_003037830.1 | - | 1549636   | 1549588   |
| Sma-1-23596 | NW_003037830.1 | - | 1549303   | 1549255   |
| Sma-1-23597 | NS_000200.1    | - | 69440007  | 69439959  |
| Sma-1-23598 | NS_000200.1    | - | 69439674  | 69439626  |
| Sma-1-23599 | NW_003026471.1 | - | 93312     | 93264     |
| Sma-1-23600 | NS_000200.1    | - | 222205545 | 222205497 |
| Sma-1-23601 | NW_003026606.1 | - | 161435    | 161387    |
| Sma-1-23602 | NS_000200.1    | - | 308017128 | 308017080 |
| Sma-1-23603 | NW_003037979.1 | - | 641250    | 641202    |
| Sma-1-23604 | NS_000200.1    | - | 210702270 | 210702222 |
| Sma-1-23605 | NW_003037981.1 | + | 1254106   | 1254154   |
| Sma-1-23606 | NS_000200.1    | + | 213651974 | 213652022 |
| Sma-1-23607 | NW_003038260.1 | + | 382583    | 382631    |
| Sma-1-23608 | NS_000200.1    | + | 323554358 | 323554406 |
| Sma-1-23609 | NW_003037803.1 | - | 1429839   | 1429791   |
| Sma-1-23610 | NS_000200.1    | - | 24930376  | 24930328  |
| Sma-1-23611 | NW_003025078.1 | + | 606       | 654       |
| Sma-1-23612 | NS_000200.1    | + | 356010410 | 356010458 |
| Sma-1-23613 | NW_003035876.1 | + | 111657    | 111705    |
| Sma-1-23614 | NS_000200.1    | + | 336943157 | 336943205 |

|             |                |   |           |           |
|-------------|----------------|---|-----------|-----------|
| Sma-1-23615 | NW_003037982.1 | - | 1059604   | 1059556   |
| Sma-1-23616 | NS_000200.1    | - | 214718799 | 214718751 |
| Sma-1-23617 | NW_003037841.1 | + | 1875678   | 1875726   |
| Sma-1-23618 | NS_000200.1    | + | 84486859  | 84486907  |
| Sma-1-23619 | NW_003037891.1 | - | 813340    | 813292    |
| Sma-1-23620 | NS_000200.1    | - | 138694618 | 138694570 |
| Sma-1-23621 | NW_003038150.1 | - | 164094    | 164046    |
| Sma-1-23622 | NS_000200.1    | - | 291642832 | 291642784 |
| Sma-1-23623 | NW_003037846.1 | - | 790807    | 790759    |
| Sma-1-23624 | NS_000200.1    | - | 88425377  | 88425329  |
| Sma-1-23625 | NW_003038013.1 | - | 55572     | 55524     |
| Sma-1-23626 | NS_000200.1    | - | 229445198 | 229445150 |
| Sma-1-23627 | NW_003038150.1 | - | 165825    | 165777    |
| Sma-1-23628 | NS_000200.1    | - | 291644563 | 291644515 |
| Sma-1-23629 | NW_003038102.1 | + | 28287     | 28335     |
| Sma-1-23630 | NS_000200.1    | + | 274707233 | 274707281 |
| Sma-1-23631 | NW_003038128.1 | + | 114491    | 114539    |
| Sma-1-23632 | NS_000200.1    | + | 280832779 | 280832827 |
| Sma-1-23633 | NW_003029647.1 | - | 3973      | 3925      |
| Sma-1-23634 | NW_003038002.1 | - | 331556    | 331508    |
| Sma-1-23635 | NW_003037810.1 | + | 145553    | 145601    |
| Sma-1-23636 | NW_003037857.1 | - | 601568    | 601520    |
| Sma-1-23637 | NW_003037899.1 | + | 219400    | 219448    |
| Sma-1-23638 | NW_003037899.1 | - | 503018    | 502970    |
| Sma-1-23639 | NW_003037914.1 | + | 723040    | 723088    |
| Sma-1-23640 | NW_003037926.1 | - | 206119    | 206071    |
| Sma-1-23641 | NW_003038003.1 | + | 195670    | 195718    |
| Sma-1-23642 | NW_003038501.1 | + | 144344    | 144392    |
| Sma-1-23643 | NW_003038154.1 | + | 283607    | 283655    |
| Sma-1-23644 | NS_000200.1    | + | 36750075  | 36750123  |
| Sma-1-23645 | NS_000200.1    | + | 144738511 | 144738559 |
| Sma-1-23646 | NS_000200.1    | + | 160867290 | 160867338 |
| Sma-1-23647 | NS_000200.1    | + | 223694952 | 223695000 |
| Sma-1-23648 | NS_000200.1    | + | 294081316 | 294081364 |
| Sma-1-23649 | NS_000200.1    | + | 334938396 | 334938444 |
| Sma-1-23650 | NS_000200.1    | - | 366345707 | 366345659 |
| Sma-1-23651 | NS_000200.1    | - | 223451765 | 223451717 |
| Sma-1-23652 | NS_000200.1    | - | 173374389 | 173374341 |
| Sma-1-23653 | NS_000200.1    | - | 145022129 | 145022081 |
| Sma-1-23654 | NS_000200.1    | - | 100621925 | 100621877 |
| Sma-1-23655 | NW_003037903.1 | + | 626047    | 626095    |
| Sma-1-23656 | NS_000200.1    | + | 148180128 | 148180176 |
| Sma-1-23657 | NW_003037853.1 | - | 81610     | 81562     |
| Sma-1-23658 | NS_000200.1    | - | 95573661  | 95573613  |
| Sma-1-23659 | NW_003038002.1 | + | 310974    | 311022    |
| Sma-1-23660 | NS_000200.1    | + | 223431183 | 223431231 |
| Sma-1-23661 | NW_003020614.1 | - | 3456      | 3408      |
| Sma-1-23662 | NW_003037889.1 | + | 920036    | 920084    |
| Sma-1-23663 | NS_000200.1    | + | 134696526 | 134696574 |
| Sma-1-23664 | NS_000200.1    | - | 360436161 | 360436113 |
| Sma-1-23665 | NW_003037891.1 | - | 1567417   | 1567369   |
| Sma-1-23666 | NS_000200.1    | - | 139448695 | 139448647 |

|             |                |   |           |           |
|-------------|----------------|---|-----------|-----------|
| Sma-1-23667 | NW_003026471.1 | - | 191649    | 191601    |
| Sma-1-23668 | NS_000200.1    | - | 222303882 | 222303834 |
| Sma-1-23669 | NW_003038081.1 | - | 345961    | 345913    |
| Sma-1-23670 | NS_000200.1    | - | 269508004 | 269507956 |
| Sma-1-23671 | NW_003026432.1 | - | 1351      | 1303      |
| Sma-1-23672 | NW_003035880.1 | + | 193289    | 193337    |
| Ehi-1-2     | NW_001916244.1 | - | 949       | 901       |
| Ehi-1-3     | NW_001916244.1 | - | 283       | 235       |
| Sma-1-23673 | NW_003026471.1 | - | 353755    | 353707    |
| Sma-1-23674 | NW_003037818.1 | + | 1438740   | 1438788   |
| Sma-1-23675 | NW_003037821.1 | - | 645951    | 645903    |
| Sma-1-23676 | NW_003037837.1 | - | 719002    | 718954    |
| Sma-1-23677 | NW_003037853.1 | + | 436959    | 437007    |
| Sma-1-23678 | NW_003037865.1 | - | 497851    | 497803    |
| Sma-1-23679 | NW_003037902.1 | - | 124151    | 124103    |
| Sma-1-23680 | NW_003037912.1 | + | 1353938   | 1353986   |
| Sma-1-23681 | NW_003037916.1 | + | 1120285   | 1120333   |
| Sma-1-23682 | NW_003037939.1 | + | 140421    | 140469    |
| Sma-1-23683 | NW_003037978.1 | - | 297238    | 297190    |
| Sma-1-23684 | NW_003037980.1 | - | 201535    | 201487    |
| Sma-1-23685 | NW_003037981.1 | + | 139328    | 139376    |
| Sma-1-23686 | NW_003038016.1 | - | 160261    | 160213    |
| Sma-1-23687 | NW_003026515.1 | + | 144961    | 145009    |
| Sma-1-23688 | NW_003038048.1 | + | 67787     | 67835     |
| Sma-1-23689 | NW_003038156.1 | - | 170587    | 170539    |
| Sma-1-23690 | NS_000200.1    | + | 50154147  | 50154195  |
| Sma-1-23691 | NS_000200.1    | + | 95929010  | 95929058  |
| Sma-1-23692 | NS_000200.1    | + | 158165513 | 158165561 |
| Sma-1-23693 | NS_000200.1    | + | 164313696 | 164313744 |
| Sma-1-23694 | NS_000200.1    | + | 183010175 | 183010223 |
| Sma-1-23695 | NS_000200.1    | + | 212537196 | 212537244 |
| Sma-1-23696 | NS_000200.1    | + | 255645618 | 255645666 |
| Sma-1-23697 | NS_000200.1    | + | 290789372 | 290789420 |
| Sma-1-23698 | NS_000200.1    | + | 339434353 | 339434401 |
| Sma-1-23699 | NS_000200.1    | - | 345004182 | 345004134 |
| Sma-1-23700 | NS_000200.1    | - | 294902700 | 294902652 |
| Sma-1-23701 | NS_000200.1    | - | 231276798 | 231276750 |
| Sma-1-23702 | NS_000200.1    | - | 222465988 | 222465940 |
| Sma-1-23703 | NS_000200.1    | - | 211162397 | 211162349 |
| Sma-1-23704 | NS_000200.1    | - | 209565248 | 209565200 |
| Sma-1-23705 | NS_000200.1    | - | 146879385 | 146879337 |
| Sma-1-23706 | NS_000200.1    | - | 110919770 | 110919722 |
| Sma-1-23707 | NS_000200.1    | - | 77524860  | 77524812  |
| Sma-1-23708 | NS_000200.1    | - | 53790435  | 53790387  |
| Sma-1-23709 | NW_003038052.1 | + | 13239     | 13287     |
| Sma-1-23710 | NS_000200.1    | + | 257060715 | 257060763 |
| Sma-1-23711 | NW_003037874.1 | - | 218935    | 218887    |
| Sma-1-23712 | NS_000200.1    | - | 119643885 | 119643837 |
| Sma-1-23713 | NW_003028088.1 | - | 1633      | 1585      |
| Sma-1-23714 | NS_000200.1    | - | 369314959 | 369314911 |
| Sma-1-23715 | NW_003038206.1 | - | 40229     | 40181     |
| Sma-1-23716 | NW_003026456.1 | - | 190793    | 190745    |

|             |                |   |           |           |
|-------------|----------------|---|-----------|-----------|
| Sma-1-23717 | NW_003037816.1 | + | 846805    | 846853    |
| Sma-1-23718 | NW_003037831.1 | + | 1312144   | 1312192   |
| Sma-1-23719 | NW_003038246.1 | - | 170829    | 170781    |
| Sma-1-23720 | NW_003038048.1 | + | 68121     | 68169     |
| Sma-1-23721 | NS_000200.1    | + | 47055677  | 47055725  |
| Sma-1-23722 | NS_000200.1    | + | 70761446  | 70761494  |
| Sma-1-23723 | NS_000200.1    | + | 255645952 | 255646000 |
| Sma-1-23724 | NS_000200.1    | - | 315811957 | 315811909 |
| Sma-1-23725 | NS_000200.1    | - | 304866993 | 304866945 |
| Sma-1-23726 | NS_000200.1    | - | 58113929  | 58113881  |
| Sma-1-23727 | NW_003038008.1 | - | 189379    | 189331    |
| Sma-1-23728 | NS_000200.1    | - | 225862475 | 225862427 |
| Sma-1-23729 | NW_003022642.1 | - | 664       | 616       |
| Sma-1-23730 | NS_000200.1    | - | 365335190 | 365335142 |
| Sma-1-23731 | NW_003037889.1 | - | 777274    | 777226    |
| Sma-1-23732 | NS_000200.1    | - | 134553764 | 134553716 |
| Sma-1-23733 | NW_003038516.1 | + | 139135    | 139183    |
| Sma-1-23734 | NW_003035881.1 | + | 138399    | 138447    |
| Sma-1-23735 | NW_003037800.1 | + | 1262582   | 1262630   |
| Sma-1-23736 | NW_003037800.1 | - | 1294421   | 1294373   |
| Sma-1-23737 | NW_003037853.1 | - | 962610    | 962562    |
| Sma-1-23738 | NW_003037942.1 | + | 478736    | 478784    |
| Sma-1-23739 | NW_003037942.1 | - | 463447    | 463399    |
| Sma-1-23740 | NW_003038032.1 | + | 664596    | 664644    |
| Sma-1-23741 | NS_000200.1    | + | 19891942  | 19891990  |
| Sma-1-23742 | NS_000200.1    | + | 186238644 | 186238692 |
| Sma-1-23743 | NS_000200.1    | + | 245823756 | 245823804 |
| Sma-1-23744 | NS_000200.1    | + | 340627540 | 340627588 |
| Sma-1-23745 | NS_000200.1    | + | 341202604 | 341202652 |
| Sma-1-23746 | NS_000200.1    | - | 186223355 | 186223307 |
| Sma-1-23747 | NS_000200.1    | - | 96454661  | 96454613  |
| Sma-1-23748 | NS_000200.1    | - | 19923781  | 19923733  |
| Sma-1-23749 | NW_003037979.1 | + | 777393    | 777441    |
| Sma-1-23750 | NS_000200.1    | + | 210838413 | 210838461 |
| Sma-1-23751 | NW_003037993.1 | + | 180427    | 180475    |
| Sma-1-23752 | NS_000200.1    | + | 218367130 | 218367178 |
| Sma-1-23753 | NW_003037861.1 | - | 440117    | 440069    |
| Sma-1-23754 | NS_000200.1    | - | 105216571 | 105216523 |
| Sma-1-23755 | NW_003037964.1 | + | 38113     | 38161     |
| Sma-1-23756 | NS_000200.1    | + | 197639635 | 197639683 |
| Sma-1-23757 | NW_003037864.1 | + | 1272959   | 1273007   |
| Sma-1-23758 | NS_000200.1    | + | 109765533 | 109765581 |
| Sma-1-23759 | NW_003035881.1 | + | 25808     | 25856     |
| Sma-1-23760 | NS_000200.1    | + | 341090013 | 341090061 |
| Sma-1-23761 | NW_003037591.1 | + | 4329      | 4377      |
| Sma-1-23762 | NW_003035662.1 | + | 18917     | 18965     |
| Sma-1-23763 | NW_003037798.1 | + | 1917228   | 1917276   |
| Sma-1-23764 | NW_003037798.1 | + | 2375775   | 2375823   |
| Sma-1-23765 | NW_003037808.1 | + | 1307796   | 1307844   |
| Sma-1-23766 | NW_003037811.1 | + | 878314    | 878362    |
| Sma-1-23767 | NW_003037813.1 | + | 87118     | 87166     |
| Sma-1-23768 | NW_003037819.1 | - | 883041    | 882993    |

|             |                |   |           |           |
|-------------|----------------|---|-----------|-----------|
| Sma-1-23769 | NW_003037826.1 | + | 1527793   | 1527841   |
| Sma-1-23770 | NW_003037871.1 | - | 315466    | 315418    |
| Sma-1-23771 | NW_003037910.1 | - | 772734    | 772686    |
| Sma-1-23772 | NW_003037915.1 | + | 697929    | 697977    |
| Sma-1-23773 | NW_003037938.1 | - | 825841    | 825793    |
| Sma-1-23774 | NW_003037941.1 | + | 375516    | 375564    |
| Sma-1-23775 | NW_003037977.1 | + | 318388    | 318436    |
| Sma-1-23776 | NW_003038410.1 | + | 27267     | 27315     |
| Sma-1-23777 | NW_003038410.1 | + | 35755     | 35803     |
| Sma-1-23778 | NW_003038474.1 | - | 41515     | 41467     |
| Sma-1-23779 | NW_003038083.1 | - | 442048    | 442000    |
| Sma-1-23780 | NW_003038187.1 | - | 18741     | 18693     |
| Sma-1-23781 | NS_000200.1    | + | 16176386  | 16176434  |
| Sma-1-23782 | NS_000200.1    | + | 16634933  | 16634981  |
| Sma-1-23783 | NS_000200.1    | + | 33094433  | 33094481  |
| Sma-1-23784 | NS_000200.1    | + | 39048556  | 39048604  |
| Sma-1-23785 | NS_000200.1    | + | 41073981  | 41074029  |
| Sma-1-23786 | NS_000200.1    | + | 62527309  | 62527357  |
| Sma-1-23787 | NS_000200.1    | + | 162597915 | 162597963 |
| Sma-1-23788 | NS_000200.1    | + | 185109990 | 185110038 |
| Sma-1-23789 | NS_000200.1    | + | 208604408 | 208604456 |
| Sma-1-23790 | NS_000200.1    | + | 328493845 | 328493893 |
| Sma-1-23791 | NS_000200.1    | + | 328502333 | 328502381 |
| Sma-1-23792 | NS_000200.1    | + | 331031223 | 331031271 |
| Sma-1-23793 | NS_000200.1    | + | 372705128 | 372705176 |
| Sma-1-23794 | NS_000200.1    | - | 332272729 | 332272681 |
| Sma-1-23795 | NS_000200.1    | - | 301970599 | 301970551 |
| Sma-1-23796 | NS_000200.1    | - | 270685385 | 270685337 |
| Sma-1-23797 | NS_000200.1    | - | 182862954 | 182862906 |
| Sma-1-23798 | NS_000200.1    | - | 155284709 | 155284661 |
| Sma-1-23799 | NS_000200.1    | - | 117763204 | 117763156 |
| Sma-1-23800 | NS_000200.1    | - | 51971306  | 51971258  |
| Sma-1-23801 | NW_003038240.1 | + | 90481     | 90529     |
| Sma-1-23802 | NS_000200.1    | + | 314229412 | 314229460 |
| Sma-1-23803 | NW_003038023.1 | - | 333385    | 333337    |
| Sma-1-23804 | NS_000200.1    | - | 237493676 | 237493628 |
| Sma-1-23805 | NW_003026464.1 | - | 473621    | 473573    |
| Sma-1-23806 | NW_003037976.1 | + | 66342     | 66390     |
| Sma-1-23807 | NS_000200.1    | + | 206680657 | 206680705 |
| Sma-1-23808 | NS_000200.1    | - | 203773930 | 203773882 |
| Sma-1-23809 | NW_003038008.1 | + | 700422    | 700470    |
| Sma-1-23810 | NS_000200.1    | + | 226373518 | 226373566 |
| Sma-1-23811 | NW_003026465.1 | + | 343139    | 343187    |
| Sma-1-23812 | NS_000200.1    | + | 207735733 | 207735781 |
| Sma-1-23813 | NW_003038156.1 | - | 11694     | 11646     |
| Sma-1-23814 | NS_000200.1    | - | 294743807 | 294743759 |
| Sma-1-23815 | NW_003038159.1 | + | 60563     | 60611     |
| Sma-1-23816 | NS_000200.1    | + | 296448584 | 296448632 |
| Sma-1-23817 | NW_003031098.1 | - | 1123      | 1075      |
| Sma-1-23818 | NW_003038014.1 | + | 300971    | 301019    |
| Sma-1-23819 | NW_003038014.1 | + | 312592    | 312640    |
| Sma-1-23820 | NS_000200.1    | + | 230041660 | 230041708 |

|             |                |   |           |           |
|-------------|----------------|---|-----------|-----------|
| Sma-1-23821 | NS_000200.1    | + | 230053281 | 230053329 |
| Sma-1-23822 | NS_000200.1    | - | 325692376 | 325692328 |
| Sma-1-23823 | NW_003037884.1 | - | 890458    | 890410    |
| Sma-1-23824 | NS_000200.1    | - | 127670123 | 127670075 |
| Sma-1-23825 | NW_003025092.1 | + | 165       | 213       |
| Sma-1-23826 | NW_003029795.1 | + | 829       | 877       |
| Sma-1-23827 | NW_003038420.1 | - | 11787     | 11739     |
| Sma-1-23828 | NW_003037822.1 | + | 78801     | 78849     |
| Sma-1-23829 | NW_003037833.1 | - | 603297    | 603249    |
| Sma-1-23830 | NW_003037886.1 | - | 1005334   | 1005286   |
| Sma-1-23831 | NW_003037915.1 | - | 593648    | 593600    |
| Sma-1-23832 | NW_003037973.1 | + | 86707     | 86755     |
| Sma-1-23833 | NW_003038036.1 | - | 1125280   | 1125232   |
| Sma-1-23834 | NW_003026488.1 | + | 66099     | 66147     |
| Sma-1-23835 | NW_003038129.1 | - | 207961    | 207913    |
| Sma-1-23836 | NS_000200.1    | + | 54386807  | 54386855  |
| Sma-1-23837 | NS_000200.1    | + | 204068434 | 204068482 |
| Sma-1-23838 | NS_000200.1    | + | 263572593 | 263572641 |
| Sma-1-23839 | NS_000200.1    | + | 361160723 | 361160771 |
| Sma-1-23840 | NS_000200.1    | + | 375627531 | 375627579 |
| Sma-1-23841 | NS_000200.1    | - | 328933818 | 328933770 |
| Sma-1-23842 | NS_000200.1    | - | 281461308 | 281461260 |
| Sma-1-23843 | NS_000200.1    | - | 250059132 | 250059084 |
| Sma-1-23844 | NS_000200.1    | - | 162493634 | 162493586 |
| Sma-1-23845 | NS_000200.1    | - | 130260901 | 130260853 |
| Sma-1-23846 | NS_000200.1    | - | 72794393  | 72794345  |
| Sma-1-23847 | NW_003038216.1 | - | 84506     | 84458     |
| Sma-1-23848 | NS_000200.1    | - | 306870138 | 306870090 |
| Sma-1-23849 | NW_003037853.1 | + | 709130    | 709178    |
| Sma-1-23850 | NS_000200.1    | + | 96201181  | 96201229  |
| Sma-1-23851 | NW_003032295.1 | + | 3171      | 3219      |
| Sma-1-23852 | NW_003037965.1 | + | 318828    | 318876    |
| Sma-1-23853 | NW_003037993.1 | - | 162791    | 162743    |
| Sma-1-23854 | NS_000200.1    | + | 198607913 | 198607961 |
| Sma-1-23855 | NS_000200.1    | + | 358631766 | 358631814 |
| Sma-1-23856 | NS_000200.1    | - | 218349494 | 218349446 |
| Sma-1-23857 | NW_003037996.1 | + | 313652    | 313700    |
| Sma-1-23858 | NS_000200.1    | + | 220558528 | 220558576 |
| Sma-1-23859 | NW_003037898.1 | + | 447803    | 447851    |
| Sma-1-23860 | NW_003037826.1 | + | 678080    | 678128    |
| Sma-1-23861 | NS_000200.1    | + | 61677596  | 61677644  |
| Sma-1-23862 | NS_000200.1    | + | 144431625 | 144431673 |
| Sma-1-23863 | NW_003037871.1 | + | 257852    | 257900    |
| Sma-1-23864 | NS_000200.1    | + | 117705590 | 117705638 |
| Sma-1-23865 | NW_003037881.1 | - | 475075    | 475027    |
| Sma-1-23866 | NS_000200.1    | - | 124906866 | 124906818 |
| Sma-1-23867 | NW_003037972.1 | + | 258436    | 258484    |
| Sma-1-23868 | NS_000200.1    | + | 202734140 | 202734188 |
| Sma-1-23869 | NW_003038033.1 | - | 816869    | 816821    |
| Sma-1-23870 | NS_000200.1    | - | 246796871 | 246796823 |
| Sma-1-23871 | NW_003038032.1 | - | 442759    | 442711    |
| Sma-1-23872 | NS_000200.1    | - | 245601919 | 245601871 |

|             |                |   |           |           |
|-------------|----------------|---|-----------|-----------|
| Sma-1-23873 | NW_003039129.1 | - | 401254    | 401206    |
| Sma-1-23874 | NW_003037887.1 | - | 424401    | 424353    |
| Sma-1-23875 | NW_003037903.1 | + | 641504    | 641552    |
| Sma-1-23876 | NS_000200.1    | + | 148195585 | 148195633 |
| Sma-1-23877 | NS_000200.1    | - | 229356062 | 229356014 |
| Sma-1-23878 | NS_000200.1    | - | 130888379 | 130888331 |
| Sma-1-23879 | NW_003038038.1 | - | 757444    | 757396    |
| Sma-1-23880 | NS_000200.1    | - | 252660837 | 252660789 |
| Sma-1-23881 | NW_003020794.1 | - | 1990      | 1942      |
| Sma-1-23882 | NW_003037874.1 | - | 117066    | 117018    |
| Sma-1-23883 | NW_003037774.1 | - | 4044      | 3996      |
| Sma-1-23884 | NW_003038006.1 | - | 37380     | 37332     |
| Sma-1-23885 | NW_003037929.1 | - | 330609    | 330561    |
| Sma-1-23886 | NW_003037793.1 | - | 2362213   | 2362165   |
| Sma-1-23887 | NW_003037800.1 | - | 1418390   | 1418342   |
| Sma-1-23888 | NW_003037809.1 | + | 753309    | 753357    |
| Sma-1-23889 | NW_003037822.1 | + | 456737    | 456785    |
| Sma-1-23890 | NW_003037839.1 | + | 977238    | 977286    |
| Sma-1-23891 | NW_003037845.1 | - | 500339    | 500291    |
| Sma-1-23892 | NW_003037884.1 | - | 1084145   | 1084097   |
| Sma-1-23893 | NW_003037901.1 | - | 518937    | 518889    |
| Sma-1-23894 | NW_003037910.1 | - | 203604    | 203556    |
| Sma-1-23895 | NW_003037915.1 | + | 1112921   | 1112969   |
| Sma-1-23896 | NW_003037971.1 | - | 276133    | 276085    |
| Sma-1-23897 | NW_003037976.1 | - | 59347     | 59299     |
| Sma-1-23898 | NW_003037979.1 | + | 110606    | 110654    |
| Sma-1-23899 | NW_003038059.1 | - | 271221    | 271173    |
| Sma-1-23900 | NW_003038120.1 | + | 193503    | 193551    |
| Sma-1-23901 | NW_003038172.1 | - | 42493     | 42445     |
| Sma-1-23902 | NS_000200.1    | + | 34417773  | 34417821  |
| Sma-1-23903 | NS_000200.1    | + | 54764743  | 54764791  |
| Sma-1-23904 | NS_000200.1    | + | 79935388  | 79935436  |
| Sma-1-23905 | NS_000200.1    | + | 163012907 | 163012955 |
| Sma-1-23906 | NS_000200.1    | + | 210171626 | 210171674 |
| Sma-1-23907 | NS_000200.1    | + | 278378726 | 278378774 |
| Sma-1-23908 | NS_000200.1    | - | 378589421 | 378589373 |
| Sma-1-23909 | NS_000200.1    | - | 364471167 | 364471119 |
| Sma-1-23910 | NS_000200.1    | - | 300716008 | 300715960 |
| Sma-1-23911 | NS_000200.1    | - | 260513293 | 260513245 |
| Sma-1-23912 | NS_000200.1    | - | 224921864 | 224921816 |
| Sma-1-23913 | NS_000200.1    | - | 206673662 | 206673614 |
| Sma-1-23914 | NS_000200.1    | - | 201898183 | 201898135 |
| Sma-1-23915 | NS_000200.1    | - | 175571387 | 175571339 |
| Sma-1-23916 | NS_000200.1    | - | 154715579 | 154715531 |
| Sma-1-23917 | NS_000200.1    | - | 146367398 | 146367350 |
| Sma-1-23918 | NS_000200.1    | - | 127863810 | 127863762 |
| Sma-1-23919 | NS_000200.1    | - | 119542016 | 119541968 |
| Sma-1-23920 | NS_000200.1    | - | 87502242  | 87502194  |
| Sma-1-23921 | NS_000200.1    | - | 20047750  | 20047702  |
| Sma-1-23922 | NS_000200.1    | - | 2362213   | 2362165   |
| Sma-1-23923 | NW_003037861.1 | + | 269592    | 269640    |
| Sma-1-23924 | NS_000200.1    | + | 105046046 | 105046094 |



|             |                |   |           |           |
|-------------|----------------|---|-----------|-----------|
| Sma-1-23925 | NW_003038242.1 | + | 224205    | 224253    |
| Sma-1-23926 | NS_000200.1    | + | 314923351 | 314923399 |
| Sma-1-23927 | NW_003037831.1 | - | 1649280   | 1649232   |
| Sma-1-23928 | NS_000200.1    | - | 71098582  | 71098534  |
| Sma-1-23929 | NW_003026458.1 | + | 436075    | 436123    |
| Sma-1-23930 | NS_000200.1    | + | 102304305 | 102304353 |
| Sma-1-23931 | NW_003038516.1 | - | 197160    | 197112    |
| Sma-1-23932 | NW_003037904.1 | + | 327615    | 327663    |
| Sma-1-23933 | NS_000200.1    | + | 149042114 | 149042162 |
| Sma-1-23934 | NS_000200.1    | - | 340685565 | 340685517 |
| Sma-1-23935 | NW_003025959.1 | - | 860       | 812       |
| Sma-1-23936 | NS_000200.1    | - | 352937212 | 352937164 |
| Sma-1-23937 | NW_003038038.1 | + | 809411    | 809459    |
| Sma-1-23938 | NS_000200.1    | + | 252712804 | 252712852 |
| Sma-1-23939 | NW_003037798.1 | + | 2098887   | 2098935   |
| Sma-1-23940 | NW_003037809.1 | - | 2531852   | 2531804   |
| Sma-1-23941 | NW_003037903.1 | + | 657307    | 657355    |
| Sma-1-23942 | NS_000200.1    | + | 16358045  | 16358093  |
| Sma-1-23943 | NS_000200.1    | + | 148211388 | 148211436 |
| Sma-1-23944 | NS_000200.1    | - | 36196316  | 36196268  |
| Sma-1-23945 | NW_003038036.1 | - | 722407    | 722359    |
| Sma-1-23946 | NS_000200.1    | - | 249656259 | 249656211 |
| Sma-1-23947 | NW_003035715.1 | - | 260       | 212       |
| Sma-1-23948 | NW_003037934.1 | + | 33989     | 34037     |
| Sma-1-23949 | NW_003037795.1 | - | 440527    | 440479    |
| Sma-1-23950 | NW_003037797.1 | + | 1032821   | 1032869   |
| Sma-1-23951 | NW_003037814.1 | + | 1605112   | 1605160   |
| Sma-1-23952 | NW_003037827.1 | + | 1111726   | 1111774   |
| Sma-1-23953 | NW_003037829.1 | + | 1808792   | 1808840   |
| Sma-1-23954 | NW_003037830.1 | - | 1078098   | 1078050   |
| Sma-1-23955 | NW_003037841.1 | + | 2327944   | 2327992   |
| Sma-1-23956 | NW_003037841.1 | - | 2327765   | 2327717   |
| Sma-1-23957 | NW_003037860.1 | - | 865758    | 865710    |
| Sma-1-23958 | NW_003037868.1 | + | 219831    | 219879    |
| Sma-1-23959 | NW_003037878.1 | - | 773174    | 773126    |
| Sma-1-23960 | NW_003037902.1 | - | 130110    | 130062    |
| Sma-1-23961 | NW_003037916.1 | - | 1615707   | 1615659   |
| Sma-1-23962 | NW_003037941.1 | + | 989084    | 989132    |
| Sma-1-23963 | NW_003037964.1 | - | 120173    | 120125    |
| Sma-1-23964 | NW_003037980.1 | + | 1361651   | 1361699   |
| Sma-1-23965 | NW_003038232.1 | + | 287560    | 287608    |
| Sma-1-23966 | NW_003038086.1 | - | 58168     | 58120     |
| Sma-1-23967 | NW_003038098.1 | + | 31460     | 31508     |
| Sma-1-23968 | NS_000200.1    | + | 11460681  | 11460729  |
| Sma-1-23969 | NS_000200.1    | + | 44588972  | 44589020  |
| Sma-1-23970 | NS_000200.1    | + | 63733867  | 63733915  |
| Sma-1-23971 | NS_000200.1    | + | 67709330  | 67709378  |
| Sma-1-23972 | NS_000200.1    | + | 84939125  | 84939173  |
| Sma-1-23973 | NS_000200.1    | + | 116191543 | 116191591 |
| Sma-1-23974 | NS_000200.1    | + | 179080736 | 179080784 |
| Sma-1-23975 | NS_000200.1    | + | 185723558 | 185723606 |
| Sma-1-23976 | NS_000200.1    | + | 212322513 | 212322561 |

|             |                |   |           |           |
|-------------|----------------|---|-----------|-----------|
| Sma-1-23977 | NS_000200.1    | + | 274416258 | 274416306 |
| Sma-1-23978 | NS_000200.1    | + | 312251351 | 312251399 |
| Sma-1-23979 | NS_000200.1    | - | 363932808 | 363932760 |
| Sma-1-23980 | NS_000200.1    | - | 272306761 | 272306713 |
| Sma-1-23981 | NS_000200.1    | - | 197721695 | 197721647 |
| Sma-1-23982 | NS_000200.1    | - | 164809118 | 164809070 |
| Sma-1-23983 | NS_000200.1    | - | 146885344 | 146885296 |
| Sma-1-23984 | NS_000200.1    | - | 122826652 | 122826604 |
| Sma-1-23985 | NS_000200.1    | - | 104608786 | 104608738 |
| Sma-1-23986 | NS_000200.1    | - | 84938946  | 84938898  |
| Sma-1-23987 | NS_000200.1    | - | 68968469  | 68968421  |
| Sma-1-23988 | NS_000200.1    | - | 6831410   | 6831362   |
| Sma-1-23989 | NW_003038033.1 | + | 401628    | 401676    |
| Sma-1-23990 | NS_000200.1    | + | 246381630 | 246381678 |
| Sma-1-23991 | NW_003026490.1 | + | 168479    | 168527    |
| Sma-1-23992 | NS_000200.1    | + | 267800195 | 267800243 |
| Sma-1-23993 | NW_003027359.1 | + | 114       | 162       |
| Sma-1-23994 | NW_003037818.1 | - | 1505247   | 1505199   |
| Sma-1-23995 | NS_000200.1    | + | 356726689 | 356726737 |
| Sma-1-23996 | NS_000200.1    | - | 50220654  | 50220606  |
| Sma-1-23997 | NW_003026609.1 | - | 40587     | 40539     |
| Sma-1-23998 | NS_000200.1    | - | 309695579 | 309695531 |
| Sma-1-23999 | NW_003037882.1 | - | 240673    | 240625    |
| Sma-1-24000 | NS_000200.1    | - | 125532347 | 125532299 |
| Sma-1-24001 | NW_003023776.1 | - | 968       | 920       |
| Sma-1-24002 | NS_000200.1    | - | 368789031 | 368788983 |
| Sma-1-24003 | NW_003037830.1 | - | 1491575   | 1491527   |
| Sma-1-24004 | NS_000200.1    | - | 69381946  | 69381898  |
| Sma-1-24005 | NW_003037972.1 | - | 355921    | 355873    |
| Sma-1-24006 | NS_000200.1    | - | 202831625 | 202831577 |
| Sma-1-24007 | NW_003037908.1 | + | 329451    | 329499    |
| Sma-1-24008 | NS_000200.1    | + | 152802582 | 152802630 |
| Sma-1-24009 | NW_003026600.1 | + | 20282     | 20330     |
| Sma-1-24010 | NS_000200.1    | + | 306291783 | 306291831 |
| Sma-1-24011 | NW_003037829.1 | - | 1641169   | 1641121   |
| Sma-1-24012 | NS_000200.1    | - | 67541707  | 67541659  |
| Sma-1-24013 | NW_003037904.1 | - | 287440    | 287392    |
| Sma-1-24014 | NS_000200.1    | - | 149001939 | 149001891 |
| Sma-1-24015 | NW_003037977.1 | - | 865002    | 864954    |
| Sma-1-24016 | NS_000200.1    | - | 209151022 | 209150974 |
| Sma-1-24017 | NW_003037834.1 | + | 970724    | 970772    |
| Sma-1-24018 | NS_000200.1    | + | 74131210  | 74131258  |
| Sma-1-24019 | NW_003037861.1 | + | 151888    | 151936    |
| Sma-1-24020 | NS_000200.1    | + | 104928342 | 104928390 |
| Sma-1-24021 | NW_003037804.1 | - | 1198365   | 1198314   |
| Sma-1-24022 | NS_000200.1    | - | 26338385  | 26338334  |
| Sma-1-24023 | NW_003037901.1 | - | 374912    | 374864    |
| Sma-1-24024 | NW_003038471.1 | - | 46603     | 46555     |
| Sma-1-24025 | NS_000200.1    | - | 331887517 | 331887469 |
| Sma-1-24026 | NS_000200.1    | - | 146223373 | 146223325 |
| Sma-1-24027 | NW_003038034.1 | + | 211830    | 211878    |
| Sma-1-24028 | NW_003038071.1 | + | 78257     | 78305     |

|             |                |   |           |           |
|-------------|----------------|---|-----------|-----------|
| Sma-1-24029 | NS.000200.1    | + | 247153586 | 247153634 |
| Sma-1-24030 | NS.000200.1    | + | 264881300 | 264881348 |
| Sma-1-24031 | NW_003037977.1 | + | 396045    | 396093    |
| Sma-1-24032 | NS.000200.1    | + | 208682065 | 208682113 |
| Sma-1-24033 | NW_003026597.1 | + | 109019    | 109067    |
| Sma-1-24034 | NS.000200.1    | + | 305730205 | 305730253 |
| Sma-1-24035 | NW_003037838.1 | + | 354932    | 354980    |
| Sma-1-24036 | NS.000200.1    | + | 78353495  | 78353543  |
| Sma-1-24037 | NW_003037840.1 | - | 1891060   | 1891012   |
| Sma-1-24038 | NW_003037840.1 | - | 1885014   | 1884966   |
| Sma-1-24039 | NS.000200.1    | - | 82514384  | 82514336  |
| Sma-1-24040 | NS.000200.1    | - | 82508338  | 82508290  |
| Sma-1-24041 | NW_003037847.1 | + | 849287    | 849335    |
| Sma-1-24042 | NS.000200.1    | + | 89501017  | 89501065  |
| Sma-1-24043 | NW_003037914.1 | + | 241794    | 241842    |
| Sma-1-24044 | NW_003037969.1 | - | 334437    | 334389    |
| Sma-1-24045 | NW_003038031.1 | + | 19901     | 19949     |
| Sma-1-24046 | NS.000200.1    | + | 160386044 | 160386092 |
| Sma-1-24047 | NS.000200.1    | + | 244297659 | 244297707 |
| Sma-1-24048 | NS.000200.1    | - | 200940564 | 200940516 |
| Sma-1-24049 | NW_003037829.1 | + | 517013    | 517061    |
| Sma-1-24050 | NS.000200.1    | + | 66417551  | 66417599  |
| Sma-1-24051 | NW_003037830.1 | + | 756445    | 756493    |
| Sma-1-24052 | NS.000200.1    | + | 68646816  | 68646864  |
| Sma-1-24053 | NW_003020771.1 | + | 233       | 281       |
| Sma-1-24054 | NW_003026472.1 | + | 21884     | 21932     |
| Sma-1-24055 | NS.000200.1    | + | 236433876 | 236433924 |
| Sma-1-24056 | NS.000200.1    | + | 364423463 | 364423511 |
| Sma-1-24057 | NW_003026458.1 | - | 402527    | 402479    |
| Sma-1-24058 | NW_003038033.1 | - | 306723    | 306675    |
| Sma-1-24059 | NS.000200.1    | - | 246286725 | 246286677 |
| Sma-1-24060 | NS.000200.1    | - | 102270757 | 102270709 |
| Sma-1-24061 | NW_003037982.1 | + | 10519     | 10567     |
| Sma-1-24062 | NS.000200.1    | + | 213669714 | 213669762 |
| Sma-1-24063 | NW_003026608.1 | + | 57177     | 57225     |
| Sma-1-24064 | NW_003037825.1 | + | 1205489   | 1205537   |
| Sma-1-24065 | NS.000200.1    | + | 60335271  | 60335319  |
| Sma-1-24066 | NS.000200.1    | + | 309335297 | 309335345 |
| Sma-1-24067 | NW_003037903.1 | - | 964540    | 964492    |
| Sma-1-24068 | NS.000200.1    | - | 148518621 | 148518573 |
| Sma-1-24069 | NW_003037841.1 | + | 582404    | 582452    |
| Sma-1-24070 | NW_003037884.1 | - | 248645    | 248597    |
| Sma-1-24071 | NW_003038145.1 | - | 241502    | 241454    |
| Sma-1-24072 | NS.000200.1    | + | 83193585  | 83193633  |
| Sma-1-24073 | NS.000200.1    | - | 288852925 | 288852877 |
| Sma-1-24074 | NS.000200.1    | - | 127028310 | 127028262 |
| Sma-1-24075 | NW_003038009.1 | + | 33530     | 33578     |
| Sma-1-24076 | NS.000200.1    | + | 226407593 | 226407641 |
| Sma-1-24077 | NW_003037926.1 | + | 296102    | 296150    |
| Sma-1-24078 | NS.000200.1    | + | 173464372 | 173464420 |
| Sma-1-24079 | NW_003037845.1 | - | 347853    | 347805    |
| Sma-1-24080 | NS.000200.1    | - | 87349756  | 87349708  |

|             |                |   |           |           |
|-------------|----------------|---|-----------|-----------|
| Sma-1-24081 | NW_003037804.1 | - | 212958    | 212910    |
| Sma-1-24082 | NW_003038261.1 | + | 449549    | 449597    |
| Sma-1-24083 | NS_000200.1    | + | 324063200 | 324063248 |
| Sma-1-24084 | NS_000200.1    | - | 25352978  | 25352930  |
| Sma-1-24085 | NW_003039127.1 | + | 1465736   | 1465784   |
| Sma-1-24086 | NW_003039127.1 | - | 1465307   | 1465259   |
| Sma-1-24087 | NS_000200.1    | + | 114543235 | 114543283 |
| Sma-1-24088 | NS_000200.1    | - | 114542806 | 114542758 |
| Sma-1-24089 | NW_003037873.1 | - | 517463    | 517415    |
| Sma-1-24090 | NS_000200.1    | - | 119256591 | 119256543 |
| Sma-1-24091 | NW_003038035.1 | + | 695782    | 695830    |
| Sma-1-24092 | NS_000200.1    | + | 248557274 | 248557322 |
| Sma-1-24093 | NW_003038157.1 | + | 302300    | 302348    |
| Sma-1-24094 | NS_000200.1    | + | 295553220 | 295553268 |
| Sma-1-24095 | NW_003021339.1 | + | 1110      | 1158      |
| Sma-1-24096 | NW_003029697.1 | - | 1297      | 1249      |
| Sma-1-24097 | NW_003038215.1 | + | 84620     | 84668     |
| Sma-1-24098 | NW_003038006.1 | - | 51217     | 51169     |
| Sma-1-24099 | NW_003038006.1 | - | 50010     | 49962     |
| Sma-1-24100 | NW_003026619.1 | - | 107581    | 107533    |
| Sma-1-24101 | NW_003037810.1 | - | 1372968   | 1372920   |
| Sma-1-24102 | NW_003037818.1 | + | 494603    | 494651    |
| Sma-1-24103 | NW_003037829.1 | + | 672346    | 672394    |
| Sma-1-24104 | NW_003037839.1 | + | 945325    | 945373    |
| Sma-1-24105 | NW_003037865.1 | - | 199320    | 199272    |
| Sma-1-24106 | NW_003037866.1 | - | 328046    | 327998    |
| Sma-1-24107 | NW_003037889.1 | + | 1506698   | 1506746   |
| Sma-1-24108 | NW_003037891.1 | + | 1629992   | 1630040   |
| Sma-1-24109 | NW_003037918.1 | - | 1608331   | 1608283   |
| Sma-1-24110 | NW_003038033.1 | + | 539002    | 539050    |
| Sma-1-24111 | NW_003038227.1 | + | 147151    | 147199    |
| Sma-1-24112 | NW_003038066.1 | - | 229778    | 229730    |
| Sma-1-24113 | NW_003038083.1 | + | 217343    | 217391    |
| Sma-1-24114 | NS_000200.1    | + | 49210010  | 49210058  |
| Sma-1-24115 | NS_000200.1    | + | 66572884  | 66572932  |
| Sma-1-24116 | NS_000200.1    | + | 79903475  | 79903523  |
| Sma-1-24117 | NS_000200.1    | + | 135283188 | 135283236 |
| Sma-1-24118 | NS_000200.1    | + | 139511270 | 139511318 |
| Sma-1-24119 | NS_000200.1    | + | 246519004 | 246519052 |
| Sma-1-24120 | NS_000200.1    | + | 270460680 | 270460728 |
| Sma-1-24121 | NS_000200.1    | + | 306697656 | 306697704 |
| Sma-1-24122 | NS_000200.1    | + | 310428505 | 310428553 |
| Sma-1-24123 | NS_000200.1    | + | 343892850 | 343892898 |
| Sma-1-24124 | NS_000200.1    | - | 366441001 | 366440953 |
| Sma-1-24125 | NS_000200.1    | - | 322298325 | 322298277 |
| Sma-1-24126 | NS_000200.1    | - | 262698722 | 262698674 |
| Sma-1-24127 | NS_000200.1    | - | 224935701 | 224935653 |
| Sma-1-24128 | NS_000200.1    | - | 224934494 | 224934446 |
| Sma-1-24129 | NS_000200.1    | - | 168175321 | 168175273 |
| Sma-1-24130 | NS_000200.1    | - | 111815845 | 111815797 |
| Sma-1-24131 | NS_000200.1    | - | 110621239 | 110621191 |
| Sma-1-24132 | NS_000200.1    | - | 37977490  | 37977442  |

|             |                |   |           |           |
|-------------|----------------|---|-----------|-----------|
| Sma-1-24133 | NW_003037853.1 | + | 432201    | 432249    |
| Sma-1-24134 | NS_000200.1    | + | 95924252  | 95924300  |
| Sma-1-24135 | NW_003037793.1 | + | 908099    | 908147    |
| Sma-1-24136 | NS_000200.1    | + | 908099    | 908147    |
| Sma-1-24137 | NW_003037975.1 | + | 375260    | 375308    |
| Sma-1-24138 | NS_000200.1    | + | 205957484 | 205957532 |
| Sma-1-24139 | NW_003026487.1 | + | 88966     | 89014     |
| Sma-1-24140 | NS_000200.1    | + | 260999660 | 260999708 |
| Sma-1-24141 | NW_003026474.1 | - | 26934     | 26886     |
| Sma-1-24142 | NS_000200.1    | - | 253225509 | 253225461 |
| Sma-1-24143 | NW_003037834.1 | + | 941441    | 941489    |
| Sma-1-24144 | NW_003037852.1 | + | 96122     | 96170     |
| Sma-1-24145 | NS_000200.1    | + | 74101927  | 74101975  |
| Sma-1-24146 | NS_000200.1    | + | 94488017  | 94488065  |
| Sma-1-24147 | NW_003037837.1 | - | 965981    | 965933    |
| Sma-1-24148 | NS_000200.1    | - | 77771839  | 77771791  |
| Sma-1-24149 | NW_003023394.1 | + | 136       | 184       |
| Sma-1-24150 | NS_000200.1    | + | 373264643 | 373264691 |
| Sma-1-24151 | NW_003037888.1 | - | 66203     | 66155     |
| Sma-1-24152 | NS_000200.1    | - | 132274695 | 132274647 |
| Sma-1-24153 | NW_003037909.1 | - | 287487    | 287439    |
| Sma-1-24154 | NS_000200.1    | - | 153829136 | 153829088 |
| Sma-1-24155 | NW_003020571.1 | + | 153       | 201       |
| Sma-1-24156 | NS_000200.1    | + | 360236053 | 360236101 |
| Sma-1-24157 | NW_003037848.1 | - | 1056667   | 1056619   |
| Sma-1-24158 | NS_000200.1    | - | 90749738  | 90749690  |
| Sma-1-24159 | NW_003038018.1 | - | 427602    | 427554    |
| Sma-1-24160 | NS_000200.1    | - | 232828452 | 232828404 |
| Sma-1-24161 | NW_003039127.1 | - | 368083    | 368035    |
| Sma-1-24162 | NS_000200.1    | - | 113445582 | 113445534 |
| Sma-1-24163 | NW_003038083.1 | + | 235226    | 235274    |
| Sma-1-24164 | NS_000200.1    | + | 270478563 | 270478611 |
| Sma-1-24165 | NW_003038087.1 | - | 116796    | 116748    |
| Sma-1-24166 | NS_000200.1    | - | 273145197 | 273145149 |
| Sma-1-24167 | NW_003038494.1 | - | 8015      | 7967      |
| Sma-1-24168 | NS_000200.1    | - | 334195716 | 334195668 |
| Sma-1-24169 | NW_003023437.1 | - | 103       | 55        |
| Sma-1-24170 | NW_003037874.1 | + | 576109    | 576157    |
| Sma-1-24171 | NW_003026472.1 | - | 102839    | 102791    |
| Sma-1-24172 | NW_003037920.1 | - | 128574    | 128526    |
| Sma-1-24173 | NW_003026465.1 | - | 632461    | 632413    |
| Sma-1-24174 | NW_003026619.1 | - | 270539    | 270491    |
| Sma-1-24175 | NW_003037797.1 | - | 1516666   | 1516618   |
| Sma-1-24176 | NW_003037813.1 | + | 1969684   | 1969732   |
| Sma-1-24177 | NW_003037816.1 | + | 176532    | 176580    |
| Sma-1-24178 | NW_003037845.1 | + | 499684    | 499732    |
| Sma-1-24179 | NW_003037863.1 | + | 759909    | 759957    |
| Sma-1-24180 | NW_003037903.1 | + | 288975    | 289023    |
| Sma-1-24181 | NW_003037906.1 | - | 402790    | 402742    |
| Sma-1-24182 | NW_003037931.1 | + | 172036    | 172084    |
| Sma-1-24183 | NW_003037933.1 | - | 330379    | 330331    |
| Sma-1-24184 | NW_003037964.1 | - | 372474    | 372426    |

|             |                |   |           |           |
|-------------|----------------|---|-----------|-----------|
| Sma-1-24185 | NW_003037976.1 | + | 327713    | 327761    |
| Sma-1-24186 | NW_003038042.1 | - | 84527     | 84479     |
| Sma-1-24187 | NS_000200.1    | + | 42956547  | 42956595  |
| Sma-1-24188 | NS_000200.1    | + | 46385404  | 46385452  |
| Sma-1-24189 | NS_000200.1    | + | 87501587  | 87501635  |
| Sma-1-24190 | NS_000200.1    | + | 107518276 | 107518324 |
| Sma-1-24191 | NS_000200.1    | + | 120001059 | 120001107 |
| Sma-1-24192 | NS_000200.1    | + | 147843056 | 147843104 |
| Sma-1-24193 | NS_000200.1    | + | 177004703 | 177004751 |
| Sma-1-24194 | NS_000200.1    | + | 206942028 | 206942076 |
| Sma-1-24195 | NS_000200.1    | - | 373379266 | 373379218 |
| Sma-1-24196 | NS_000200.1    | - | 322461283 | 322461235 |
| Sma-1-24197 | NS_000200.1    | - | 254030126 | 254030078 |
| Sma-1-24198 | NS_000200.1    | - | 236514831 | 236514783 |
| Sma-1-24199 | NS_000200.1    | - | 208025055 | 208025007 |
| Sma-1-24200 | NS_000200.1    | - | 197973996 | 197973948 |
| Sma-1-24201 | NS_000200.1    | - | 178743551 | 178743503 |
| Sma-1-24202 | NS_000200.1    | - | 169309381 | 169309333 |
| Sma-1-24203 | NS_000200.1    | - | 150710569 | 150710521 |
| Sma-1-24204 | NS_000200.1    | - | 11944526  | 11944478  |
| Sma-1-24205 | NW_003037865.1 | + | 526015    | 526063    |
| Sma-1-24206 | NS_000200.1    | + | 110947934 | 110947982 |
| Sma-1-24207 | NW_003029842.1 | + | 10028     | 10076     |
| Sma-1-24208 | NS_000200.1    | + | 376360547 | 376360595 |
| Sma-1-24209 | NW_003038197.1 | + | 48391     | 48439     |
| Sma-1-24210 | NS_000200.1    | + | 303284718 | 303284766 |
| Sma-1-24211 | NW_003037906.1 | + | 763724    | 763772    |
| Sma-1-24212 | NS_000200.1    | + | 151071503 | 151071551 |
| Sma-1-24213 | NW_003037859.1 | - | 689061    | 689013    |
| Sma-1-24214 | NS_000200.1    | - | 103367902 | 103367854 |
| Sma-1-24215 | NW_003038035.1 | + | 363681    | 363729    |
| Sma-1-24216 | NS_000200.1    | + | 248225173 | 248225221 |
| Sma-1-24217 | NW_003035319.1 | - | 338       | 290       |
| Sma-1-24218 | NW_003038457.1 | - | 22678     | 22630     |
| Sma-1-24219 | NW_003037813.1 | + | 1994159   | 1994207   |
| Sma-1-24220 | NW_003037887.1 | - | 1629637   | 1629589   |
| Sma-1-24221 | NW_003037900.1 | + | 38326     | 38374     |
| Sma-1-24222 | NW_003037916.1 | - | 174182    | 174134    |
| Sma-1-24223 | NW_003037918.1 | - | 1835069   | 1835021   |
| Sma-1-24224 | NS_000200.1    | + | 42981022  | 42981070  |
| Sma-1-24225 | NS_000200.1    | + | 145167192 | 145167240 |
| Sma-1-24226 | NS_000200.1    | - | 371004181 | 371004133 |
| Sma-1-24227 | NS_000200.1    | - | 331104542 | 331104494 |
| Sma-1-24228 | NS_000200.1    | - | 168402059 | 168402011 |
| Sma-1-24229 | NS_000200.1    | - | 163367593 | 163367545 |
| Sma-1-24230 | NS_000200.1    | - | 132093615 | 132093567 |
| Sma-1-24231 | NW_003037914.1 | + | 477885    | 477933    |
| Sma-1-24232 | NS_000200.1    | + | 160622135 | 160622183 |
| Sma-1-24233 | NW_003037793.1 | + | 2084803   | 2084851   |
| Sma-1-24234 | NW_003037846.1 | - | 658461    | 658413    |
| Sma-1-24235 | NW_003037864.1 | - | 976016    | 975968    |
| Sma-1-24236 | NW_003037878.1 | + | 768223    | 768271    |

|             |                |   |           |           |
|-------------|----------------|---|-----------|-----------|
| Sma-1-24237 | NW_003037900.1 | - | 63275     | 63227     |
| Sma-1-24238 | NW_003038241.1 | + | 69886     | 69934     |
| Sma-1-24239 | NS_000200.1    | + | 2084803   | 2084851   |
| Sma-1-24240 | NS_000200.1    | + | 122821701 | 122821749 |
| Sma-1-24241 | NS_000200.1    | + | 314532591 | 314532639 |
| Sma-1-24242 | NS_000200.1    | - | 145192141 | 145192093 |
| Sma-1-24243 | NS_000200.1    | - | 109468590 | 109468542 |
| Sma-1-24244 | NS_000200.1    | - | 88293031  | 88292983  |
| Sma-1-24245 | NW_003037873.1 | - | 69858     | 69810     |
| Sma-1-24246 | NS_000200.1    | - | 118808986 | 118808938 |
| Sma-1-24247 | NW_003037793.1 | - | 1950236   | 1950188   |
| Sma-1-24248 | NS_000200.1    | - | 1950236   | 1950188   |
| Sma-1-24249 | NW_003037793.1 | + | 2606627   | 2606675   |
| Sma-1-24250 | NS_000200.1    | + | 2606627   | 2606675   |
| Sma-1-24251 | NW_003037823.1 | - | 794226    | 794178    |
| Sma-1-24252 | NS_000200.1    | - | 56710845  | 56710797  |
| Sma-1-24253 | NW_003026488.1 | - | 267453    | 267404    |
| Sma-1-24254 | NS_000200.1    | - | 263773947 | 263773898 |
| Sma-1-24255 | NW_003037814.1 | + | 169823    | 169871    |
| Sma-1-24256 | NW_003037829.1 | - | 1479728   | 1479680   |
| Sma-1-24257 | NW_003037943.1 | + | 1171095   | 1171143   |
| Sma-1-24258 | NS_000200.1    | + | 43153683  | 43153731  |
| Sma-1-24259 | NS_000200.1    | + | 188192628 | 188192676 |
| Sma-1-24260 | NS_000200.1    | - | 67380266  | 67380218  |
| Sma-1-24261 | NW_003035551.1 | - | 4836      | 4788      |
| Sma-1-24262 | NS_000200.1    | - | 328405009 | 328404961 |
| Sma-1-24263 | NW_003037796.1 | - | 1042298   | 1042250   |
| Sma-1-24264 | NS_000200.1    | - | 9251942   | 9251894   |
| Sma-1-24265 | NW_003037932.1 | + | 128507    | 128555    |
| Sma-1-24266 | NS_000200.1    | + | 177661703 | 177661751 |
| Sma-1-24267 | NW_003037853.1 | - | 318041    | 317993    |
| Sma-1-24268 | NS_000200.1    | - | 95810092  | 95810044  |
| Sma-1-24269 | NW_003038517.1 | + | 71867     | 71915     |
| Sma-1-24270 | NS_000200.1    | + | 340836355 | 340836403 |
| Sma-1-24271 | NW_003037924.1 | - | 631961    | 631913    |
| Sma-1-24272 | NS_000200.1    | - | 172338919 | 172338871 |
| Sma-1-24273 | NW_003037805.1 | + | 1263142   | 1263190   |
| Sma-1-24274 | NS_000200.1    | + | 27820986  | 27821034  |
| Sma-1-24275 | NW_003037918.1 | + | 2042011   | 2042059   |
| Sma-1-24276 | NS_000200.1    | + | 168609001 | 168609049 |
| Sma-1-24277 | NW_003037917.1 | - | 550200    | 550152    |
| Sma-1-24278 | NS_000200.1    | - | 165587004 | 165586956 |
| Sma-1-24279 | NW_003037807.1 | + | 1479859   | 1479907   |
| Sma-1-24280 | NS_000200.1    | + | 31741375  | 31741423  |
| Sma-1-24281 | NW_003037792.1 | - | 445377    | 445329    |
| Sma-1-24282 | NS_000200.1    | - | 382882721 | 382882673 |
| Sma-1-24283 | NW_003037792.1 | - | 456949    | 456901    |
| Sma-1-24284 | NS_000200.1    | - | 382894293 | 382894245 |
| Sma-1-24285 | NW_003030424.1 | + | 1076      | 1124      |
| Sma-1-24286 | NS_000200.1    | + | 362871421 | 362871469 |
| Sma-1-24287 | NW_003026615.1 | + | 84724     | 84772     |
| Sma-1-24288 | NS_000200.1    | + | 317079165 | 317079213 |

|             |                |   |           |           |
|-------------|----------------|---|-----------|-----------|
| Sma-1-24289 | NW_003039127.1 | + | 579302    | 579350    |
| Sma-1-24290 | NS_000200.1    | + | 113656801 | 113656849 |
| Sma-1-24291 | NW_003038241.1 | + | 56932     | 56980     |
| Sma-1-24292 | NS_000200.1    | + | 314519637 | 314519685 |
| Sma-1-24293 | NW_003037910.1 | - | 1045099   | 1045051   |
| Sma-1-24294 | NS_000200.1    | - | 155557074 | 155557026 |
| Sma-1-24295 | NW_003037890.1 | + | 2091760   | 2091808   |
| Sma-1-24296 | NS_000200.1    | + | 137775121 | 137775169 |
| Sma-1-24297 | NW_003037904.1 | - | 110134    | 110086    |
| Sma-1-24298 | NS_000200.1    | - | 148824633 | 148824585 |
| Sma-1-24299 | NW_003037917.1 | - | 1275368   | 1275320   |
| Sma-1-24300 | NS_000200.1    | - | 166312172 | 166312124 |
| Sma-1-24301 | NW_003038102.1 | - | 35323     | 35275     |
| Sma-1-24302 | NS_000200.1    | - | 274714269 | 274714221 |
| Sma-1-24303 | NW_003037939.1 | - | 389571    | 389523    |
| Sma-1-24304 | NS_000200.1    | - | 183259325 | 183259277 |
| Sma-1-24305 | NW_003037808.1 | + | 940343    | 940391    |
| Sma-1-24306 | NS_000200.1    | + | 32726980  | 32727028  |
| Sma-1-24307 | NW_003037928.1 | - | 114822    | 114774    |
| Sma-1-24308 | NS_000200.1    | - | 174438775 | 174438727 |
| Sma-1-24309 | NW_003038261.1 | + | 298618    | 298666    |
| Sma-1-24310 | NS_000200.1    | + | 323912269 | 323912317 |
| Sma-1-24311 | NW_003020280.1 | + | 451       | 499       |
| Sma-1-24312 | NW_003038079.1 | - | 124775    | 124727    |
| Sma-1-24313 | NS_000200.1    | + | 371335409 | 371335457 |
| Sma-1-24314 | NS_000200.1    | - | 268254763 | 268254715 |
| Sma-1-24315 | NW_003026465.1 | - | 587236    | 587188    |
| Sma-1-24316 | NS_000200.1    | - | 207979830 | 207979782 |
| Sma-1-24317 | NW_003038518.1 | - | 932279    | 932231    |
| Sma-1-24318 | NS_000200.1    | - | 342569112 | 342569064 |
| Sma-1-24319 | NW_003037800.1 | + | 1892725   | 1892773   |
| Sma-1-24320 | NS_000200.1    | + | 20522085  | 20522133  |
| Sma-1-24321 | NW_003037925.1 | + | 335597    | 335645    |
| Sma-1-24322 | NS_000200.1    | + | 172737600 | 172737648 |
| Sma-1-24323 | NW_003037799.1 | - | 816903    | 816855    |
| Sma-1-24324 | NS_000200.1    | - | 17807257  | 17807209  |
| Sma-1-24325 | NW_003037911.1 | - | 217841    | 217793    |
| Sma-1-24326 | NS_000200.1    | - | 156005194 | 156005146 |
| Sma-1-24327 | NW_003038084.1 | + | 366363    | 366411    |
| Sma-1-24328 | NS_000200.1    | + | 271381607 | 271381655 |
| Sma-1-24329 | NW_003038029.1 | - | 237664    | 237616    |
| Sma-1-24330 | NS_000200.1    | - | 242438565 | 242438517 |
| Sma-1-24331 | NW_003029627.1 | - | 2800      | 2752      |
| Sma-1-24332 | NS_000200.1    | - | 366289629 | 366289581 |
| Sma-1-24333 | NW_003032336.1 | + | 150       | 198       |
| Sma-1-24334 | NW_003037802.1 | - | 532630    | 532582    |
| Sma-1-24335 | NS_000200.1    | + | 345912717 | 345912765 |
| Sma-1-24336 | NS_000200.1    | - | 22535424  | 22535376  |
| Sma-1-24337 | NW_003037809.1 | - | 2420758   | 2420710   |
| Sma-1-24338 | NW_003038145.1 | - | 343988    | 343940    |
| Sma-1-24339 | NS_000200.1    | - | 288955411 | 288955363 |
| Sma-1-24340 | NS_000200.1    | - | 36085222  | 36085174  |



|             |                |   |           |           |
|-------------|----------------|---|-----------|-----------|
| Sma-1-24341 | NW_003037916.1 | - | 1695060   | 1695012   |
| Sma-1-24342 | NS_000200.1    | - | 164888471 | 164888423 |
| Sma-1-24343 | NW_003037914.1 | + | 252538    | 252586    |
| Sma-1-24344 | NS_000200.1    | + | 160396788 | 160396836 |
| Sma-1-24345 | NW_003037815.1 | - | 302688    | 302640    |
| Sma-1-24346 | NS_000200.1    | - | 45565679  | 45565631  |
| Sma-1-24347 | NW_003037816.1 | - | 692719    | 692671    |
| Sma-1-24348 | NS_000200.1    | - | 46901591  | 46901543  |
| Sma-1-24349 | NW_003037914.1 | + | 1551824   | 1551872   |
| Sma-1-24350 | NS_000200.1    | + | 161696074 | 161696122 |
| Sma-1-24351 | NW_003037816.1 | - | 951454    | 951406    |
| Sma-1-24352 | NS_000200.1    | - | 47160326  | 47160278  |
| Sma-1-24353 | NW_003037824.1 | + | 703773    | 703821    |
| Sma-1-24354 | NS_000200.1    | + | 57634713  | 57634761  |
| Sma-1-24355 | NW_003037791.1 | + | 233356    | 233404    |
| Sma-1-24356 | NS_000200.1    | + | 381938784 | 381938832 |
| Sma-1-24357 | NW_003035424.1 | + | 389       | 437       |
| Sma-1-24358 | NS_000200.1    | + | 367443284 | 367443332 |
| Sma-1-24359 | NW_003032930.1 | + | 800       | 848       |
| Sma-1-24360 | NS_000200.1    | + | 326007774 | 326007822 |
| Sma-1-24361 | NW_003020608.1 | - | 1383      | 1335      |
| Sma-1-24362 | NW_003038137.1 | - | 138005    | 137957    |
| Sma-1-24363 | NS_000200.1    | - | 360418837 | 360418789 |
| Sma-1-24364 | NS_000200.1    | - | 284926901 | 284926853 |
| Sma-1-24365 | NW_003037861.1 | - | 623679    | 623631    |
| Sma-1-24366 | NS_000200.1    | - | 105400133 | 105400085 |
| Sma-1-24367 | NW_003038259.1 | + | 229510    | 229558    |
| Sma-1-24368 | NS_000200.1    | + | 323090109 | 323090157 |
| Sma-1-24369 | NW_003038037.1 | + | 1693902   | 1693950   |
| Sma-1-24370 | NS_000200.1    | + | 251849311 | 251849359 |
| Sma-1-24371 | NW_003026465.1 | + | 163268    | 163316    |
| Sma-1-24372 | NW_003037798.1 | - | 2673282   | 2673234   |
| Sma-1-24373 | NW_003037854.1 | + | 125992    | 126040    |
| Sma-1-24374 | NW_003037878.1 | + | 179621    | 179669    |
| Sma-1-24375 | NW_003038023.1 | - | 620393    | 620345    |
| Sma-1-24376 | NW_003038027.1 | + | 92226     | 92274     |
| Sma-1-24377 | NS_000200.1    | + | 97030413  | 97030461  |
| Sma-1-24378 | NS_000200.1    | + | 122233099 | 122233147 |
| Sma-1-24379 | NS_000200.1    | + | 207555862 | 207555910 |
| Sma-1-24380 | NS_000200.1    | + | 240462940 | 240462988 |
| Sma-1-24381 | NS_000200.1    | - | 237780684 | 237780636 |
| Sma-1-24382 | NS_000200.1    | - | 16932440  | 16932392  |
| Sma-1-24383 | NW_003037912.1 | - | 1712800   | 1712752   |
| Sma-1-24384 | NS_000200.1    | - | 158524375 | 158524327 |
| Sma-1-24385 | NW_003037841.1 | - | 2014354   | 2014306   |
| Sma-1-24386 | NS_000200.1    | - | 84625535  | 84625487  |
| Sma-1-24387 | NW_003037886.1 | - | 866799    | 866751    |
| Sma-1-24388 | NW_003037896.1 | - | 504233    | 504185    |
| Sma-1-24389 | NS_000200.1    | - | 143424656 | 143424608 |
| Sma-1-24390 | NS_000200.1    | - | 130122366 | 130122318 |
| Sma-1-24391 | NW_003037974.1 | + | 259986    | 260034    |
| Sma-1-24392 | NS_000200.1    | + | 204935292 | 204935340 |

|             |                |   |           |           |
|-------------|----------------|---|-----------|-----------|
| Sma-1-24393 | NW_003026512.1 | + | 181671    | 181719    |
| Sma-1-24394 | NW_003038081.1 | + | 89326     | 89374     |
| Sma-1-24395 | NS_000200.1    | + | 269251369 | 269251417 |
| Sma-1-24396 | NS_000200.1    | + | 285275711 | 285275759 |
| Sma-1-24397 | NW_003037777.1 | - | 80206     | 80158     |
| Sma-1-24398 | NW_003037799.1 | + | 983797    | 983845    |
| Sma-1-24399 | NW_003037903.1 | - | 431729    | 431681    |
| Sma-1-24400 | NW_003037905.1 | - | 386166    | 386118    |
| Sma-1-24401 | NS_000200.1    | + | 17974151  | 17974199  |
| Sma-1-24402 | NS_000200.1    | - | 378897992 | 378897944 |
| Sma-1-24403 | NS_000200.1    | - | 149655178 | 149655130 |
| Sma-1-24404 | NS_000200.1    | - | 147985810 | 147985762 |
| Sma-1-24405 | NW_003038514.1 | - | 179573    | 179525    |
| Sma-1-24406 | NW_003038009.1 | - | 184683    | 184635    |
| Sma-1-24407 | NW_003026456.1 | - | 667353    | 667305    |
| Sma-1-24408 | NW_003037810.1 | - | 545014    | 544966    |
| Sma-1-24409 | NW_003037813.1 | - | 1491896   | 1491848   |
| Sma-1-24410 | NW_003037816.1 | - | 755004    | 754956    |
| Sma-1-24411 | NW_003037839.1 | - | 995564    | 995516    |
| Sma-1-24412 | NW_003037882.1 | + | 218739    | 218787    |
| Sma-1-24413 | NW_003037911.1 | - | 980338    | 980290    |
| Sma-1-24414 | NW_003037935.1 | - | 902502    | 902454    |
| Sma-1-24415 | NW_003037945.1 | - | 1449876   | 1449828   |
| Sma-1-24416 | NW_003038034.1 | - | 588223    | 588175    |
| Sma-1-24417 | NW_003026517.1 | + | 82238     | 82286     |
| Sma-1-24418 | NW_003038145.1 | - | 2911      | 2863      |
| Sma-1-24419 | NS_000200.1    | + | 125510413 | 125510461 |
| Sma-1-24420 | NS_000200.1    | + | 299688247 | 299688295 |
| Sma-1-24421 | NS_000200.1    | - | 339804112 | 339804064 |
| Sma-1-24422 | NS_000200.1    | - | 288614334 | 288614286 |
| Sma-1-24423 | NS_000200.1    | - | 247529979 | 247529931 |
| Sma-1-24424 | NS_000200.1    | - | 226558746 | 226558698 |
| Sma-1-24425 | NS_000200.1    | - | 190551840 | 190551792 |
| Sma-1-24426 | NS_000200.1    | - | 180319037 | 180318989 |
| Sma-1-24427 | NS_000200.1    | - | 156767691 | 156767643 |
| Sma-1-24428 | NS_000200.1    | - | 79953714  | 79953666  |
| Sma-1-24429 | NS_000200.1    | - | 58590489  | 58590441  |
| Sma-1-24430 | NS_000200.1    | - | 46963876  | 46963828  |
| Sma-1-24431 | NS_000200.1    | - | 42478759  | 42478711  |
| Sma-1-24432 | NS_000200.1    | - | 37149536  | 37149488  |
| Sma-1-24433 | NW_003026465.1 | + | 725275    | 725323    |
| Sma-1-24434 | NS_000200.1    | + | 208117869 | 208117917 |
| Sma-1-24435 | NW_003039127.1 | - | 1476422   | 1476374   |
| Sma-1-24436 | NS_000200.1    | - | 114553921 | 114553873 |
| Sma-1-24437 | NW_003037797.1 | - | 3449967   | 3449919   |
| Sma-1-24438 | NS_000200.1    | - | 13877827  | 13877779  |
| Sma-1-24439 | NW_003038001.1 | + | 224909    | 224957    |
| Sma-1-24440 | NS_000200.1    | + | 222934470 | 222934518 |
| Sma-1-24441 | NW_003038252.1 | - | 345285    | 345237    |
| Sma-1-24442 | NS_000200.1    | - | 319200873 | 319200825 |
| Sma-1-24443 | NW_003030936.1 | - | 790       | 742       |
| Sma-1-24444 | NW_003037802.1 | - | 290064    | 290016    |

|             |                |   |           |           |
|-------------|----------------|---|-----------|-----------|
| Sma-1-24445 | NW_003037813.1 | + | 1302144   | 1302192   |
| Sma-1-24446 | NW_003037858.1 | + | 842068    | 842116    |
| Sma-1-24447 | NW_003037884.1 | - | 897452    | 897404    |
| Sma-1-24448 | NW_003037887.1 | + | 1660732   | 1660780   |
| Sma-1-24449 | NS_000200.1    | + | 42289007  | 42289055  |
| Sma-1-24450 | NS_000200.1    | + | 101506344 | 101506392 |
| Sma-1-24451 | NS_000200.1    | + | 132124710 | 132124758 |
| Sma-1-24452 | NS_000200.1    | - | 370555173 | 370555125 |
| Sma-1-24453 | NS_000200.1    | - | 127677117 | 127677069 |
| Sma-1-24454 | NS_000200.1    | - | 22292858  | 22292810  |
| Sma-1-24455 | NW_003037911.1 | + | 546968    | 547016    |
| Sma-1-24456 | NS_000200.1    | + | 156334321 | 156334369 |
| Sma-1-24457 | NW_003037889.1 | - | 1296344   | 1296296   |
| Sma-1-24458 | NS_000200.1    | - | 135072834 | 135072786 |
| Sma-1-24459 | NW_003037923.1 | + | 379208    | 379256    |
| Sma-1-24460 | NW_003026507.1 | - | 135084    | 135036    |
| Sma-1-24461 | NW_003038042.1 | - | 186700    | 186652    |
| Sma-1-24462 | NS_000200.1    | + | 171435421 | 171435469 |
| Sma-1-24463 | NS_000200.1    | - | 279795235 | 279795187 |
| Sma-1-24464 | NS_000200.1    | - | 254132299 | 254132251 |
| Sma-1-24465 | NW_003037910.1 | - | 75532     | 75484     |
| Sma-1-24466 | NS_000200.1    | - | 154587507 | 154587459 |
| Sma-1-24467 | NW_003037829.1 | + | 609368    | 609416    |
| Sma-1-24468 | NW_003037914.1 | + | 161023    | 161071    |
| Sma-1-24469 | NS_000200.1    | + | 66509906  | 66509954  |
| Sma-1-24470 | NS_000200.1    | + | 160305273 | 160305321 |
| Sma-1-24471 | NW_003028283.1 | - | 961       | 913       |
| Sma-1-24472 | NS_000200.1    | - | 374470433 | 374470385 |
| Sma-1-24473 | NW_003037974.1 | - | 217008    | 216960    |
| Sma-1-24474 | NS_000200.1    | - | 204892314 | 204892266 |
| Sma-1-24475 | NW_003037837.1 | + | 322691    | 322739    |
| Sma-1-24476 | NS_000200.1    | + | 77128549  | 77128597  |
| Sma-1-24477 | NW_003038033.1 | - | 730232    | 730184    |
| Sma-1-24478 | NS_000200.1    | - | 246710234 | 246710186 |
| Sma-1-24479 | NW_003037799.1 | + | 1519035   | 1519083   |
| Sma-1-24480 | NS_000200.1    | + | 18509389  | 18509437  |
| Sma-1-24481 | NW_003037791.1 | + | 527982    | 528030    |
| Sma-1-24482 | NS_000200.1    | + | 382233410 | 382233458 |
| Sma-1-24483 | NW_003037962.1 | + | 32446     | 32494     |
| Sma-1-24484 | NS_000200.1    | + | 196109289 | 196109337 |
| Sma-1-24485 | NW_003037825.1 | + | 581649    | 581697    |
| Sma-1-24486 | NW_003037916.1 | - | 115300    | 115252    |
| Sma-1-24487 | NS_000200.1    | + | 59711431  | 59711479  |
| Sma-1-24488 | NS_000200.1    | - | 163308711 | 163308663 |
| Sma-1-24489 | NW_003038083.1 | + | 689042    | 689090    |
| Sma-1-24490 | NS_000200.1    | + | 270932379 | 270932427 |
| Sma-1-24491 | NW_003037999.1 | - | 104575    | 104527    |
| Sma-1-24492 | NS_000200.1    | - | 221799129 | 221799081 |
| Sma-1-24493 | NW_003035519.1 | + | 860       | 908       |
| Sma-1-24494 | NW_003037793.1 | + | 2061343   | 2061391   |
| Sma-1-24495 | NW_003037798.1 | - | 1866891   | 1866843   |
| Sma-1-24496 | NW_003038059.1 | + | 85531     | 85579     |

|             |                |   |           |           |
|-------------|----------------|---|-----------|-----------|
| Sma-1-24497 | NS_000200.1    | + | 2061343   | 2061391   |
| Sma-1-24498 | NS_000200.1    | + | 260327603 | 260327651 |
| Sma-1-24499 | NS_000200.1    | + | 328331815 | 328331863 |
| Sma-1-24500 | NS_000200.1    | - | 16126049  | 16126001  |
| Sma-1-24501 | NW_003026458.1 | - | 688234    | 688186    |
| Sma-1-24502 | NS_000200.1    | - | 102556464 | 102556416 |
| Sma-1-24503 | NW_003038030.1 | + | 935365    | 935413    |
| Sma-1-24504 | NS_000200.1    | + | 244071232 | 244071280 |
| Sma-1-24505 | NW_003037851.1 | - | 405273    | 405225    |
| Sma-1-24506 | NS_000200.1    | - | 93808583  | 93808535  |
| Sma-1-24507 | NW_003037977.1 | - | 89067     | 89019     |
| Sma-1-24508 | NS_000200.1    | - | 208375087 | 208375039 |
| Sma-1-24509 | NW_003037904.1 | - | 124903    | 124855    |
| Sma-1-24510 | NS_000200.1    | - | 148839402 | 148839354 |
| Sma-1-24511 | NW_003038136.1 | - | 55019     | 54971     |
| Sma-1-24512 | NS_000200.1    | - | 284177088 | 284177040 |
| Sma-1-24513 | NW_003037865.1 | - | 294608    | 294560    |
| Sma-1-24514 | NW_003038227.1 | - | 90333     | 90285     |
| Sma-1-24515 | NS_000200.1    | - | 310371687 | 310371639 |
| Sma-1-24516 | NS_000200.1    | - | 110716527 | 110716479 |
| Sma-1-24517 | NW_003037872.1 | + | 520913    | 520961    |
| Sma-1-24518 | NS_000200.1    | + | 118477919 | 118477967 |
| Sma-1-24519 | NW_003037805.1 | - | 3280      | 3232      |
| Sma-1-24520 | NW_003038149.1 | + | 317658    | 317706    |
| Sma-1-24521 | NS_000200.1    | + | 291346271 | 291346319 |
| Sma-1-24522 | NS_000200.1    | - | 26561124  | 26561076  |
| Sma-1-24523 | NW_003038131.1 | - | 234974    | 234926    |
| Sma-1-24524 | NS_000200.1    | - | 282196818 | 282196770 |
| Sma-1-24525 | NW_003028775.1 | + | 164       | 212       |
| Sma-1-24526 | NS_000200.1    | + | 369914603 | 369914651 |
| Sma-1-24527 | NW_003037878.1 | - | 198943    | 198895    |
| Sma-1-24528 | NS_000200.1    | - | 122252421 | 122252373 |
| Sma-1-24529 | NW_003038517.1 | + | 106097    | 106145    |
| Sma-1-24530 | NS_000200.1    | + | 340870585 | 340870633 |
| Sma-1-24531 | NW_003028877.1 | + | 1592      | 1640      |
| Sma-1-24532 | NW_003037822.1 | + | 508470    | 508518    |
| Sma-1-24533 | NW_003037943.1 | - | 1192948   | 1192900   |
| Sma-1-24534 | NW_003037946.1 | - | 1132140   | 1132092   |
| Sma-1-24535 | NW_003038247.1 | - | 43559     | 43511     |
| Sma-1-24536 | NS_000200.1    | + | 54816476  | 54816524  |
| Sma-1-24537 | NS_000200.1    | + | 370135953 | 370136001 |
| Sma-1-24538 | NS_000200.1    | - | 315992287 | 315992239 |
| Sma-1-24539 | NS_000200.1    | - | 191826000 | 191825952 |
| Sma-1-24540 | NS_000200.1    | - | 188214481 | 188214433 |
| Sma-1-24541 | NW_003026611.1 | - | 253598    | 253550    |
| Sma-1-24542 | NS_000200.1    | - | 310823382 | 310823334 |
| Sma-1-24543 | NW_003037825.1 | + | 1022853   | 1022901   |
| Sma-1-24544 | NW_003037953.1 | + | 163171    | 163219    |
| Sma-1-24545 | NW_003037976.1 | + | 398800    | 398848    |
| Sma-1-24546 | NW_003038027.1 | + | 33822     | 33870     |
| Sma-1-24547 | NS_000200.1    | + | 60152635  | 60152683  |
| Sma-1-24548 | NS_000200.1    | + | 193076222 | 193076270 |

|             |                |   |           |           |
|-------------|----------------|---|-----------|-----------|
| Sma-1-24549 | NS_000200.1    | + | 207013115 | 207013163 |
| Sma-1-24550 | NS_000200.1    | + | 240404536 | 240404584 |
| Sma-1-24551 | NW_003038480.1 | + | 13501     | 13549     |
| Sma-1-24552 | NW_003037846.1 | - | 299968    | 299920    |
| Sma-1-24553 | NW_003037886.1 | - | 967268    | 967220    |
| Sma-1-24554 | NW_003037971.1 | + | 88223     | 88271     |
| Sma-1-24555 | NW_003038031.1 | + | 377653    | 377701    |
| Sma-1-24556 | NS_000200.1    | + | 201710273 | 201710321 |
| Sma-1-24557 | NS_000200.1    | + | 244655411 | 244655459 |
| Sma-1-24558 | NS_000200.1    | + | 332750064 | 332750112 |
| Sma-1-24559 | NS_000200.1    | - | 130222835 | 130222787 |
| Sma-1-24560 | NS_000200.1    | - | 87934538  | 87934490  |
| Sma-1-24561 | NW_003038161.1 | + | 416127    | 416175    |
| Sma-1-24562 | NS_000200.1    | + | 297785978 | 297786026 |
| Sma-1-24563 | NW_003038223.1 | + | 129986    | 130034    |
| Sma-1-24564 | NS_000200.1    | + | 309198420 | 309198468 |
| Sma-1-24565 | NW_003037939.1 | - | 634525    | 634477    |
| Sma-1-24566 | NS_000200.1    | - | 183504279 | 183504231 |
| Sma-1-24567 | NW_003037842.1 | + | 121766    | 121814    |
| Sma-1-24568 | NW_003037914.1 | - | 1475272   | 1475224   |
| Sma-1-24569 | NS_000200.1    | + | 85220956  | 85221004  |
| Sma-1-24570 | NS_000200.1    | - | 161619522 | 161619474 |
| Sma-1-24571 | NW_003037909.1 | + | 223376    | 223427    |
| Sma-1-24572 | NS_000200.1    | + | 153765025 | 153765076 |
| Sma-1-24573 | NW_003037825.1 | - | 345896    | 345848    |
| Sma-1-24574 | NS_000200.1    | - | 59475678  | 59475630  |
| Sma-1-24575 | NW_003038249.1 | - | 302403    | 302355    |
| Sma-1-24576 | NS_000200.1    | - | 316984656 | 316984608 |
| Sma-1-24577 | NW_003037863.1 | - | 1299309   | 1299261   |
| Sma-1-24578 | NW_003038251.1 | - | 106208    | 106160    |
| Sma-1-24579 | NS_000200.1    | - | 318437980 | 318437932 |
| Sma-1-24580 | NS_000200.1    | - | 108057676 | 108057628 |
| Sma-1-24581 | NW_003038511.1 | - | 168148    | 168100    |
| Sma-1-24582 | NW_003038067.1 | - | 150977    | 150929    |
| Sma-1-24583 | NS_000200.1    | - | 338513360 | 338513312 |
| Sma-1-24584 | NS_000200.1    | - | 263005030 | 263004982 |
| Sma-1-24585 | NW_003038037.1 | + | 590988    | 591036    |
| Sma-1-24586 | NS_000200.1    | + | 250746397 | 250746445 |
| Sma-1-24587 | NW_003038097.1 | - | 25093     | 25045     |
| Sma-1-24588 | NS_000200.1    | - | 274275395 | 274275347 |
| Sma-1-24589 | NW_003024383.1 | - | 1935      | 1887      |
| Sma-1-24590 | NW_003037591.1 | + | 4663      | 4711      |
| Sma-1-24591 | NW_003038231.1 | + | 180619    | 180667    |
| Sma-1-24592 | NW_003037934.1 | - | 299227    | 299179    |
| Sma-1-24593 | NW_003026458.1 | - | 166312    | 166264    |
| Sma-1-24594 | NW_003026619.1 | + | 340723    | 340771    |
| Sma-1-24595 | NW_003037799.1 | - | 392195    | 392147    |
| Sma-1-24596 | NW_003037802.1 | - | 313914    | 313866    |
| Sma-1-24597 | NW_003037807.1 | + | 1154875   | 1154923   |
| Sma-1-24598 | NW_003037827.1 | - | 1519597   | 1519549   |
| Sma-1-24599 | NW_003037829.1 | + | 676626    | 676674    |
| Sma-1-24600 | NW_003037831.1 | + | 251911    | 251959    |

|             |                |   |           |           |
|-------------|----------------|---|-----------|-----------|
| Sma-1-24601 | NW_003037836.1 | + | 825669    | 825717    |
| Sma-1-24602 | NW_003037838.1 | + | 553856    | 553904    |
| Sma-1-24603 | NW_003037847.1 | + | 185753    | 185801    |
| Sma-1-24604 | NW_003037848.1 | - | 537687    | 537639    |
| Sma-1-24605 | NW_003037853.1 | + | 518312    | 518360    |
| Sma-1-24606 | NW_003037872.1 | - | 470789    | 470741    |
| Sma-1-24607 | NW_003037891.1 | - | 912903    | 912855    |
| Sma-1-24608 | NW_003037911.1 | + | 951990    | 952038    |
| Sma-1-24609 | NW_003037916.1 | - | 908924    | 908876    |
| Sma-1-24610 | NW_003037958.1 | - | 321371    | 321323    |
| Sma-1-24611 | NW_003038033.1 | - | 919140    | 919092    |
| Sma-1-24612 | NW_003026507.1 | - | 103777    | 103729    |
| Sma-1-24613 | NW_003026509.1 | - | 49687     | 49639     |
| Sma-1-24614 | NW_003038053.1 | + | 578925    | 578973    |
| Sma-1-24615 | NW_003038053.1 | - | 578641    | 578593    |
| Sma-1-24616 | NW_003038083.1 | - | 80730     | 80682     |
| Sma-1-24617 | NW_003038126.1 | + | 285888    | 285936    |
| Sma-1-24618 | NW_003038129.1 | - | 246145    | 246097    |
| Sma-1-24619 | NW_003038148.1 | + | 510997    | 511045    |
| Sma-1-24620 | NW_003038148.1 | + | 513687    | 513735    |
| Sma-1-24621 | NW_003038161.1 | + | 554866    | 554914    |
| Sma-1-24622 | NW_003038192.1 | + | 13697     | 13745     |
| Sma-1-24623 | NS_000200.1    | + | 31416391  | 31416439  |
| Sma-1-24624 | NS_000200.1    | + | 66577164  | 66577212  |
| Sma-1-24625 | NS_000200.1    | + | 69701213  | 69701261  |
| Sma-1-24626 | NS_000200.1    | + | 76382768  | 76382816  |
| Sma-1-24627 | NS_000200.1    | + | 78552419  | 78552467  |
| Sma-1-24628 | NS_000200.1    | + | 88837483  | 88837531  |
| Sma-1-24629 | NS_000200.1    | + | 96010363  | 96010411  |
| Sma-1-24630 | NS_000200.1    | + | 156739343 | 156739391 |
| Sma-1-24631 | NS_000200.1    | + | 257939020 | 257939068 |
| Sma-1-24632 | NS_000200.1    | + | 280296300 | 280296348 |
| Sma-1-24633 | NS_000200.1    | + | 290584981 | 290585029 |
| Sma-1-24634 | NS_000200.1    | + | 290587671 | 290587719 |
| Sma-1-24635 | NS_000200.1    | + | 297924717 | 297924765 |
| Sma-1-24636 | NS_000200.1    | + | 302575604 | 302575652 |
| Sma-1-24637 | NS_000200.1    | + | 311788772 | 311788820 |
| Sma-1-24638 | NS_000200.1    | + | 322531467 | 322531515 |
| Sma-1-24639 | NS_000200.1    | + | 372705462 | 372705510 |
| Sma-1-24640 | NS_000200.1    | - | 365622921 | 365622873 |
| Sma-1-24641 | NS_000200.1    | - | 281549796 | 281549748 |
| Sma-1-24642 | NS_000200.1    | - | 281499492 | 281499444 |
| Sma-1-24643 | NS_000200.1    | - | 279763928 | 279763880 |
| Sma-1-24644 | NS_000200.1    | - | 270324067 | 270324019 |
| Sma-1-24645 | NS_000200.1    | - | 257938736 | 257938688 |
| Sma-1-24646 | NS_000200.1    | - | 246899142 | 246899094 |
| Sma-1-24647 | NS_000200.1    | - | 194985555 | 194985507 |
| Sma-1-24648 | NS_000200.1    | - | 179345974 | 179345926 |
| Sma-1-24649 | NS_000200.1    | - | 164102335 | 164102287 |
| Sma-1-24650 | NS_000200.1    | - | 138794181 | 138794133 |
| Sma-1-24651 | NS_000200.1    | - | 118427795 | 118427747 |
| Sma-1-24652 | NS_000200.1    | - | 102034542 | 102034494 |

|             |                |   |           |           |
|-------------|----------------|---|-----------|-----------|
| Sma-1-24653 | NS_000200.1    | - | 90230758  | 90230710  |
| Sma-1-24654 | NS_000200.1    | - | 64141738  | 64141690  |
| Sma-1-24655 | NS_000200.1    | - | 22316708  | 22316660  |
| Sma-1-24656 | NS_000200.1    | - | 17382549  | 17382501  |
| Sma-1-24657 | NW_003038011.1 | - | 289757    | 289709    |
| Sma-1-24658 | NS_000200.1    | - | 227817407 | 227817359 |
| Sma-1-24659 | NW_003037839.1 | - | 807896    | 807848    |
| Sma-1-24660 | NW_003037877.1 | + | 604857    | 604905    |
| Sma-1-24661 | NW_003026507.1 | - | 43440     | 43392     |
| Sma-1-24662 | NS_000200.1    | + | 121643419 | 121643467 |
| Sma-1-24663 | NS_000200.1    | - | 279703591 | 279703543 |
| Sma-1-24664 | NS_000200.1    | - | 79766046  | 79765998  |
| Sma-1-24665 | NW_003026616.1 | + | 315118    | 315166    |
| Sma-1-24666 | NS_000200.1    | + | 317671717 | 317671765 |
| Sma-1-24667 | NW_003034794.1 | - | 583       | 535       |
| Sma-1-24668 | NW_003026466.1 | - | 132955    | 132907    |
| Sma-1-24669 | NW_003038368.1 | + | 48124     | 48172     |
| Sma-1-24670 | NS_000200.1    | + | 327066066 | 327066114 |
| Sma-1-24671 | NS_000200.1    | - | 347003259 | 347003211 |
| Sma-1-24672 | NS_000200.1    | - | 215400062 | 215400014 |
| Sma-1-24673 | NW_003035682.1 | + | 33182     | 33230     |
| Sma-1-24674 | NS_000200.1    | + | 332655235 | 332655283 |
| Sma-1-24675 | NW_003037798.1 | + | 1249131   | 1249179   |
| Sma-1-24676 | NS_000200.1    | + | 15508289  | 15508337  |
| Sma-1-24677 | NW_003037916.1 | + | 1093692   | 1093740   |
| Sma-1-24678 | NS_000200.1    | + | 164287103 | 164287151 |
| Sma-1-24679 | NW_003038471.1 | + | 65966     | 66014     |
| Sma-1-24680 | NS_000200.1    | + | 331906880 | 331906928 |
| Sma-1-24681 | NW_003037854.1 | + | 1771812   | 1771860   |
| Sma-1-24682 | NS_000200.1    | + | 98676233  | 98676281  |
| Sma-1-24683 | NW_003037810.1 | - | 1275461   | 1275413   |
| Sma-1-24684 | NW_003037856.1 | - | 629240    | 629192    |
| Sma-1-24685 | NS_000200.1    | - | 99987196  | 99987148  |
| Sma-1-24686 | NS_000200.1    | - | 37879983  | 37879935  |
| Sma-1-24687 | NW_003037796.1 | + | 573003    | 573051    |
| Sma-1-24688 | NS_000200.1    | + | 8782647   | 8782695   |
| Sma-1-24689 | NW_003038152.1 | + | 336918    | 336966    |
| Sma-1-24690 | NS_000200.1    | + | 292942642 | 292942690 |
| Sma-1-24691 | NW_003038070.1 | - | 262982    | 262934    |
| Sma-1-24692 | NW_003037793.1 | - | 2076154   | 2076106   |
| Sma-1-24693 | NW_003037812.1 | + | 1005884   | 1005932   |
| Sma-1-24694 | NW_003038053.1 | - | 427527    | 427479    |
| Sma-1-24695 | NS_000200.1    | + | 40488623  | 40488671  |
| Sma-1-24696 | NS_000200.1    | - | 264600223 | 264600175 |
| Sma-1-24697 | NS_000200.1    | - | 257787622 | 257787574 |
| Sma-1-24698 | NS_000200.1    | - | 2076154   | 2076106   |
| Sma-1-24699 | NW_003038420.1 | - | 28819     | 28771     |
| Sma-1-24700 | NS_000200.1    | - | 328950850 | 328950802 |
| Sma-1-24701 | NW_003032868.1 | - | 242       | 194       |
| Sma-1-24702 | NW_003038044.1 | + | 24606     | 24654     |
| Sma-1-24703 | NS_000200.1    | + | 254649388 | 254649436 |
| Sma-1-24704 | NS_000200.1    | - | 354185712 | 354185664 |

|             |                |   |           |           |
|-------------|----------------|---|-----------|-----------|
| Sma-1-24705 | NW_003038221.1 | + | 69055     | 69103     |
| Sma-1-24706 | NS_000200.1    | + | 308710319 | 308710367 |
| Sma-1-24707 | NW_003037968.1 | + | 455197    | 455245    |
| Sma-1-24708 | NS_000200.1    | + | 200372367 | 200372415 |
| Sma-1-24709 | NW_003037979.1 | + | 460526    | 460574    |
| Sma-1-24710 | NS_000200.1    | + | 210521546 | 210521594 |
| Sma-1-24711 | NW_003037913.1 | + | 407240    | 407288    |
| Sma-1-24712 | NS_000200.1    | + | 158970991 | 158971039 |
| Sma-1-24713 | NW_003037913.1 | + | 283753    | 283801    |
| Sma-1-24714 | NS_000200.1    | + | 158847504 | 158847552 |
| Sma-1-24715 | NW_003037818.1 | - | 2160447   | 2160399   |
| Sma-1-24716 | NW_003037854.1 | + | 927221    | 927269    |
| Sma-1-24717 | NS_000200.1    | + | 97831642  | 97831690  |
| Sma-1-24718 | NS_000200.1    | - | 50875854  | 50875806  |
| Sma-1-24719 | NW_003038504.1 | + | 95585     | 95633     |
| Sma-1-24720 | NS_000200.1    | + | 335944117 | 335944165 |
| Sma-1-24721 | NW_003026508.1 | - | 30702     | 30654     |
| Sma-1-24722 | NW_003038045.1 | + | 34382     | 34430     |
| Sma-1-24723 | NS_000200.1    | + | 254811993 | 254812041 |
| Sma-1-24724 | NS_000200.1    | - | 281075316 | 281075268 |
| Sma-1-24725 | NW_003037939.1 | + | 374962    | 375010    |
| Sma-1-24726 | NW_003038078.1 | + | 97002     | 97050     |
| Sma-1-24727 | NS_000200.1    | + | 183244716 | 183244764 |
| Sma-1-24728 | NS_000200.1    | + | 267303205 | 267303253 |
| Sma-1-24729 | NW_003037830.1 | - | 419523    | 419475    |
| Sma-1-24730 | NS_000200.1    | - | 68309894  | 68309846  |
| Sma-1-24731 | NW_003037976.1 | - | 650697    | 650649    |
| Sma-1-24732 | NS_000200.1    | - | 207265012 | 207264964 |
| Sma-1-24733 | NW_003037878.1 | - | 743685    | 743636    |
| Sma-1-24734 | NS_000200.1    | - | 122797163 | 122797114 |
| Sma-1-24735 | NW_003036888.1 | + | 248       | 296       |
| Sma-1-24736 | NS_000200.1    | + | 347909310 | 347909358 |
| Sma-1-24737 | NW_003026472.1 | - | 161721    | 161673    |
| Sma-1-24738 | NS_000200.1    | - | 236573713 | 236573665 |
| Sma-1-24739 | NW_003037816.1 | - | 844234    | 844186    |
| Sma-1-24740 | NS_000200.1    | - | 47053106  | 47053058  |
| Sma-1-24741 | NW_003038030.1 | + | 354981    | 355029    |
| Sma-1-24742 | NS_000200.1    | + | 243490848 | 243490896 |
| Sma-1-24743 | NW_003023461.1 | - | 1631      | 1583      |
| Sma-1-24744 | NS_000200.1    | - | 373443669 | 373443621 |
| Sma-1-24745 | NW_003037841.1 | + | 184404    | 184452    |
| Sma-1-24746 | NS_000200.1    | + | 82795585  | 82795633  |
| Sma-1-24747 | NW_003037891.1 | + | 197630    | 197678    |
| Sma-1-24748 | NW_003037912.1 | + | 509457    | 509505    |
| Sma-1-24749 | NW_003038029.1 | - | 715749    | 715701    |
| Sma-1-24750 | NS_000200.1    | + | 138078908 | 138078956 |
| Sma-1-24751 | NS_000200.1    | + | 157321032 | 157321080 |
| Sma-1-24752 | NS_000200.1    | - | 242916650 | 242916602 |
| Sma-1-24753 | NW_003037851.1 | - | 563187    | 563139    |
| Sma-1-24754 | NS_000200.1    | - | 93966497  | 93966449  |
| Sma-1-24755 | NW_003038457.1 | - | 18182     | 18134     |
| Sma-1-24756 | NS_000200.1    | - | 331100046 | 331099998 |



|             |                |   |           |           |
|-------------|----------------|---|-----------|-----------|
| Sma-1-24757 | NW_003038119.1 | - | 139072    | 139024    |
| Sma-1-24758 | NS_000200.1    | - | 278046628 | 278046580 |
| Sma-1-24759 | NW_003037856.1 | + | 618048    | 618096    |
| Sma-1-24760 | NW_003037943.1 | - | 492021    | 491973    |
| Sma-1-24761 | NS_000200.1    | + | 99976004  | 99976052  |
| Sma-1-24762 | NS_000200.1    | - | 187513554 | 187513506 |
| Sma-1-24763 | NW_003037798.1 | + | 1351792   | 1351840   |
| Sma-1-24764 | NW_003037859.1 | + | 850064    | 850112    |
| Sma-1-24765 | NS_000200.1    | + | 15610950  | 15610998  |
| Sma-1-24766 | NS_000200.1    | + | 103528905 | 103528953 |
| Sma-1-24767 | NW_003037975.1 | + | 792656    | 792704    |
| Sma-1-24768 | NS_000200.1    | + | 206374880 | 206374928 |
| Sma-1-24769 | NW_003037810.1 | + | 162808    | 162856    |
| Sma-1-24770 | NS_000200.1    | + | 36767330  | 36767378  |
| Sma-1-24771 | NW_003037903.1 | + | 464086    | 464134    |
| Sma-1-24772 | NS_000200.1    | + | 148018167 | 148018215 |
| Sma-1-24773 | NW_003037797.1 | + | 3432953   | 3433001   |
| Sma-1-24774 | NS_000200.1    | + | 13860813  | 13860861  |
| Sma-1-24775 | NW_003029997.1 | - | 219       | 171       |
| Sma-1-24776 | NW_003038084.1 | - | 523503    | 523455    |
| Sma-1-24777 | NS_000200.1    | - | 357401459 | 357401411 |
| Sma-1-24778 | NS_000200.1    | - | 271538747 | 271538699 |
| Sma-1-24779 | NW_003037787.1 | - | 62898     | 62850     |
| Sma-1-24780 | NS_000200.1    | - | 380311067 | 380311019 |
| Sma-1-24781 | NW_003037847.1 | - | 996410    | 996362    |
| Sma-1-24782 | NS_000200.1    | - | 89648140  | 89648092  |
| Sma-1-24783 | NW_003037908.1 | + | 182358    | 182406    |
| Sma-1-24784 | NS_000200.1    | + | 152655489 | 152655537 |
| Sma-1-24785 | NW_003028987.1 | + | 66        | 114       |
| Sma-1-24786 | NW_003038474.1 | - | 82040     | 81992     |
| Sma-1-24787 | NS_000200.1    | + | 375075180 | 375075228 |
| Sma-1-24788 | NS_000200.1    | - | 332313254 | 332313206 |
| Sma-1-24789 | NW_003027666.1 | - | 923       | 875       |
| Sma-1-24790 | NW_003038037.1 | - | 46536     | 46488     |
| Sma-1-24791 | NS_000200.1    | - | 361828127 | 361828079 |
| Sma-1-24792 | NS_000200.1    | - | 250201945 | 250201897 |
| Sma-1-24793 | NW_003037854.1 | - | 510231    | 510183    |
| Sma-1-24794 | NS_000200.1    | - | 97414652  | 97414604  |
| Sma-1-24795 | NW_003037839.1 | - | 1225714   | 1225666   |
| Sma-1-24796 | NS_000200.1    | - | 80183864  | 80183816  |
| Sma-1-24797 | NW_003037827.1 | - | 582758    | 582710    |
| Sma-1-24798 | NS_000200.1    | - | 63204899  | 63204851  |
| Sma-1-24799 | NW_003038070.1 | + | 8786      | 8834      |
| Sma-1-24800 | NS_000200.1    | + | 264346027 | 264346075 |
| Sma-1-24801 | NW_003038148.1 | - | 158116    | 158068    |
| Sma-1-24802 | NS_000200.1    | - | 290232100 | 290232052 |
| Sma-1-24803 | NW_003037885.1 | - | 577299    | 577251    |
| Sma-1-24804 | NS_000200.1    | - | 128675246 | 128675198 |
| Sma-1-24805 | NW_003037790.1 | + | 72787     | 72835     |
| Sma-1-24806 | NS_000200.1    | + | 381416959 | 381417007 |
| Sma-1-24807 | NW_003037834.1 | + | 1063376   | 1063424   |
| Sma-1-24808 | NS_000200.1    | + | 74223862  | 74223910  |

|             |                |   |           |           |
|-------------|----------------|---|-----------|-----------|
| Sma-1-24809 | NW_003037859.1 | + | 734172    | 734220    |
| Sma-1-24810 | NS_000200.1    | + | 103413013 | 103413061 |
| Sma-1-24811 | NW_003038839.1 | - | 685       | 637       |
| Sma-1-24812 | NW_003038364.1 | - | 52        | 4         |
| Sma-1-24813 | NW_003037907.1 | + | 460509    | 460557    |
| Sma-1-24814 | NW_003037967.1 | - | 108356    | 108308    |
| Sma-1-24815 | NS_000200.1    | + | 151864998 | 151865046 |
| Sma-1-24816 | NS_000200.1    | - | 352560000 | 352559952 |
| Sma-1-24817 | NS_000200.1    | - | 326886349 | 326886301 |
| Sma-1-24818 | NS_000200.1    | - | 199348327 | 199348279 |
| Sma-1-24819 | NW_003038025.1 | + | 225539    | 225589    |
| Sma-1-24820 | NS_000200.1    | + | 239083784 | 239083834 |
| Sma-1-24821 | NW_003037886.1 | - | 383597    | 383549    |
| Sma-1-24822 | NS_000200.1    | - | 129639164 | 129639116 |
| Sma-1-24823 | NW_003037902.1 | + | 466906    | 466954    |
| Sma-1-24824 | NW_003037916.1 | - | 1624090   | 1624042   |
| Sma-1-24825 | NS_000200.1    | + | 147222140 | 147222188 |
| Sma-1-24826 | NS_000200.1    | - | 164817501 | 164817453 |
| Sma-1-24827 | NW_003038053.1 | - | 411280    | 411232    |
| Sma-1-24828 | NS_000200.1    | - | 257771375 | 257771327 |
| Sma-1-24829 | NW_003037885.1 | - | 509301    | 509253    |
| Sma-1-24830 | NS_000200.1    | - | 128607248 | 128607200 |
| Sma-1-24831 | NW_003037945.1 | + | 750612    | 750660    |
| Sma-1-24832 | NS_000200.1    | + | 189852576 | 189852624 |
| Sma-1-24833 | NW_003026342.1 | - | 701       | 653       |
| Sma-1-24834 | NW_003026805.1 | - | 102       | 54        |
| Sma-1-24835 | NW_003027824.1 | - | 945       | 897       |
| Sma-1-24836 | NW_003028092.1 | - | 518       | 470       |
| Sma-1-24837 | NW_003030968.1 | + | 633       | 681       |
| Sma-1-24838 | NW_003032158.1 | - | 24934     | 24886     |
| Sma-1-24839 | NW_003032158.1 | - | 15248     | 15200     |
| Sma-1-24840 | NW_003033658.1 | + | 41        | 89        |
| Sma-1-24841 | NW_003036382.1 | - | 3625      | 3577      |
| Sma-1-24842 | NW_003035680.1 | + | 32338     | 32386     |
| Sma-1-24843 | NW_003037794.1 | - | 1789088   | 1789040   |
| Sma-1-24844 | NW_003037794.1 | - | 1788422   | 1788374   |
| Sma-1-24845 | NW_003037798.1 | + | 2459146   | 2459194   |
| Sma-1-24846 | NW_003037806.1 | - | 1898113   | 1898065   |
| Sma-1-24847 | NW_003037818.1 | + | 2252170   | 2252218   |
| Sma-1-24848 | NW_003037827.1 | - | 1848719   | 1848671   |
| Sma-1-24849 | NW_003037829.1 | - | 1955931   | 1955883   |
| Sma-1-24850 | NW_003037831.1 | - | 1543080   | 1543032   |
| Sma-1-24851 | NW_003037848.1 | + | 658033    | 658081    |
| Sma-1-24852 | NW_003037854.1 | - | 443612    | 443564    |
| Sma-1-24853 | NW_003037870.1 | + | 230358    | 230406    |
| Sma-1-24854 | NW_003037880.1 | - | 465802    | 465754    |
| Sma-1-24855 | NW_003037885.1 | - | 805727    | 805679    |
| Sma-1-24856 | NW_003037913.1 | + | 233514    | 233562    |
| Sma-1-24857 | NW_003037961.1 | - | 159400    | 159352    |
| Sma-1-24858 | NW_003037968.1 | + | 201974    | 202022    |
| Sma-1-24859 | NW_003037972.1 | + | 413901    | 413949    |
| Sma-1-24860 | NW_003038015.1 | - | 619475    | 619427    |

|             |                |   |           |           |
|-------------|----------------|---|-----------|-----------|
| Sma-1-24861 | NW_003038033.1 | - | 284718    | 284670    |
| Sma-1-24862 | NW_003038515.1 | + | 390623    | 390671    |
| Sma-1-24863 | NW_003038518.1 | + | 649058    | 649106    |
| Sma-1-24864 | NW_003026485.1 | - | 145858    | 145810    |
| Sma-1-24865 | NW_003026490.1 | - | 143464    | 143416    |
| Sma-1-24866 | NW_003026511.1 | + | 339205    | 339253    |
| Sma-1-24867 | NW_003026514.1 | - | 115215    | 115167    |
| Sma-1-24868 | NW_003038059.1 | + | 53467     | 53515     |
| Sma-1-24869 | NW_003038152.1 | + | 101794    | 101842    |
| Sma-1-24870 | NW_003038153.1 | + | 657238    | 657286    |
| Sma-1-24871 | NW_003038153.1 | + | 691870    | 691918    |
| Sma-1-24872 | NS_000200.1    | + | 16718304  | 16718352  |
| Sma-1-24873 | NS_000200.1    | + | 50967577  | 50967625  |
| Sma-1-24874 | NS_000200.1    | + | 90351104  | 90351152  |
| Sma-1-24875 | NS_000200.1    | + | 117104023 | 117104071 |
| Sma-1-24876 | NS_000200.1    | + | 158797265 | 158797313 |
| Sma-1-24877 | NS_000200.1    | + | 200119144 | 200119192 |
| Sma-1-24878 | NS_000200.1    | + | 202889605 | 202889653 |
| Sma-1-24879 | NS_000200.1    | + | 260295539 | 260295587 |
| Sma-1-24880 | NS_000200.1    | + | 284722257 | 284722305 |
| Sma-1-24881 | NS_000200.1    | + | 292707518 | 292707566 |
| Sma-1-24882 | NS_000200.1    | + | 293719287 | 293719335 |
| Sma-1-24883 | NS_000200.1    | + | 293753919 | 293753967 |
| Sma-1-24884 | NS_000200.1    | + | 331975777 | 331975825 |
| Sma-1-24885 | NS_000200.1    | + | 340474688 | 340474736 |
| Sma-1-24886 | NS_000200.1    | + | 342285891 | 342285939 |
| Sma-1-24887 | NS_000200.1    | + | 354426439 | 354426487 |
| Sma-1-24888 | NS_000200.1    | + | 370628330 | 370628378 |
| Sma-1-24889 | NS_000200.1    | - | 380757213 | 380757165 |
| Sma-1-24890 | NS_000200.1    | - | 380747527 | 380747479 |
| Sma-1-24891 | NS_000200.1    | - | 369321348 | 369321300 |
| Sma-1-24892 | NS_000200.1    | - | 365989334 | 365989286 |
| Sma-1-24893 | NS_000200.1    | - | 359772370 | 359772322 |
| Sma-1-24894 | NS_000200.1    | - | 345234134 | 345234086 |
| Sma-1-24895 | NS_000200.1    | - | 344773068 | 344773020 |
| Sma-1-24896 | NS_000200.1    | - | 288573902 | 288573854 |
| Sma-1-24897 | NS_000200.1    | - | 267775180 | 267775132 |
| Sma-1-24898 | NS_000200.1    | - | 258500763 | 258500715 |
| Sma-1-24899 | NS_000200.1    | - | 246264720 | 246264672 |
| Sma-1-24900 | NS_000200.1    | - | 230942965 | 230942917 |
| Sma-1-24901 | NS_000200.1    | - | 195783642 | 195783594 |
| Sma-1-24902 | NS_000200.1    | - | 128903674 | 128903626 |
| Sma-1-24903 | NS_000200.1    | - | 124149360 | 124149312 |
| Sma-1-24904 | NS_000200.1    | - | 97348033  | 97347985  |
| Sma-1-24905 | NS_000200.1    | - | 70992382  | 70992334  |
| Sma-1-24906 | NS_000200.1    | - | 67856469  | 67856421  |
| Sma-1-24907 | NS_000200.1    | - | 64470860  | 64470812  |
| Sma-1-24908 | NS_000200.1    | - | 30093327  | 30093279  |
| Sma-1-24909 | NS_000200.1    | - | 5968683   | 5968635   |
| Sma-1-24910 | NS_000200.1    | - | 5968017   | 5967969   |
| Sma-1-24911 | NW_003028166.1 | - | 2394      | 2346      |
| Sma-1-24912 | NW_003037914.1 | + | 1036084   | 1036132   |

|             |                |   |           |           |
|-------------|----------------|---|-----------|-----------|
| Sma-1-24913 | NW_003038057.1 | + | 175604    | 175652    |
| Sma-1-24914 | NW_003038080.1 | + | 238116    | 238164    |
| Sma-1-24915 | NS_000200.1    | + | 161180334 | 161180382 |
| Sma-1-24916 | NS_000200.1    | + | 259381420 | 259381468 |
| Sma-1-24917 | NS_000200.1    | + | 268690726 | 268690774 |
| Sma-1-24918 | NS_000200.1    | - | 374191140 | 374191092 |
| Sma-1-24919 | NW_003037972.1 | + | 243879    | 243927    |
| Sma-1-24920 | NS_000200.1    | + | 202719583 | 202719631 |
| Sma-1-24921 | NW_003037854.1 | - | 13158     | 13110     |
| Sma-1-24922 | NS_000200.1    | - | 96917579  | 96917531  |
| Sma-1-24923 | NW_003037925.1 | - | 468086    | 468038    |
| Sma-1-24924 | NS_000200.1    | - | 172870089 | 172870041 |
| Sma-1-24925 | NW_003026599.1 | + | 128348    | 128396    |
| Sma-1-24926 | NS_000200.1    | + | 306006677 | 306006725 |
| Sma-1-24927 | NW_003037830.1 | + | 1137142   | 1137190   |
| Sma-1-24928 | NS_000200.1    | + | 69027513  | 69027561  |
| Sma-1-24929 | NW_003039127.1 | - | 1643105   | 1643057   |
| Sma-1-24930 | NS_000200.1    | - | 114720604 | 114720556 |
| Sma-1-24931 | NW_003025687.1 | - | 1485      | 1437      |
| Sma-1-24932 | NW_003037852.1 | + | 1050973   | 1051021   |
| Sma-1-24933 | NS_000200.1    | + | 95442868  | 95442916  |
| Sma-1-24934 | NS_000200.1    | - | 356361787 | 356361739 |
| Sma-1-24935 | NW_003037894.1 | - | 202175    | 202127    |
| Sma-1-24936 | NS_000200.1    | - | 142098748 | 142098700 |
| Sma-1-24937 | NW_003037891.1 | - | 2311652   | 2311604   |
| Sma-1-24938 | NS_000200.1    | - | 140192930 | 140192882 |
| Sma-1-24939 | NW_003037889.1 | - | 1716500   | 1716452   |
| Sma-1-24940 | NS_000200.1    | - | 135492990 | 135492942 |
| Sma-1-24941 | NW_003037793.1 | - | 826491    | 826443    |
| Sma-1-24942 | NW_003038066.1 | - | 382865    | 382817    |
| Sma-1-24943 | NS_000200.1    | - | 262851809 | 262851761 |
| Sma-1-24944 | NS_000200.1    | - | 826491    | 826443    |
| Sma-1-24945 | NW_003038032.1 | - | 526607    | 526559    |
| Sma-1-24946 | NS_000200.1    | - | 245685767 | 245685719 |
| Sma-1-24947 | NW_003037873.1 | - | 52201     | 52153     |
| Sma-1-24948 | NS_000200.1    | - | 118791329 | 118791281 |
| env-93      | AB231864.1     | - | 54792     | 54744     |
| Sma-1-24949 | NW_003020574.1 | + | 1440      | 1488      |
| Sma-1-24950 | NS_000200.1    | + | 360261886 | 360261934 |
| Sma-1-24951 | NW_003020796.1 | + | 455       | 503       |
| Sma-1-24952 | NW_003037793.1 | + | 426281    | 426329    |
| Sma-1-24953 | NW_003037804.1 | + | 947299    | 947347    |
| Sma-1-24954 | NW_003037810.1 | + | 774926    | 774974    |
| Sma-1-24955 | NW_003037810.1 | - | 770819    | 770771    |
| Sma-1-24956 | NW_003037825.1 | + | 74563     | 74611     |
| Sma-1-24957 | NW_003037838.1 | - | 289723    | 289675    |
| Sma-1-24958 | NW_003037852.1 | - | 764916    | 764868    |
| Sma-1-24959 | NW_003037891.1 | + | 2777015   | 2777063   |
| Sma-1-24960 | NW_003037906.1 | - | 494833    | 494785    |
| Sma-1-24961 | NW_003037971.1 | - | 253153    | 253105    |
| Sma-1-24962 | NW_003038014.1 | - | 384773    | 384725    |
| Sma-1-24963 | NW_003038026.1 | - | 271025    | 270977    |

|             |                |   |           |           |
|-------------|----------------|---|-----------|-----------|
| Sma-1-24964 | NW_003038033.1 | - | 817694    | 817646    |
| Sma-1-24965 | NW_003038518.1 | + | 872485    | 872533    |
| Sma-1-24966 | NW_003039127.1 | + | 2355479   | 2355527   |
| Sma-1-24967 | NW_003038056.1 | - | 108397    | 108349    |
| Sma-1-24968 | NW_003038057.1 | - | 197647    | 197599    |
| Sma-1-24969 | NW_003038083.1 | - | 170476    | 170428    |
| Sma-1-24970 | NW_003038155.1 | + | 360391    | 360439    |
| Sma-1-24971 | NS_000200.1    | + | 426281    | 426329    |
| Sma-1-24972 | NS_000200.1    | + | 26087319  | 26087367  |
| Sma-1-24973 | NS_000200.1    | + | 37379448  | 37379496  |
| Sma-1-24974 | NS_000200.1    | + | 59204345  | 59204393  |
| Sma-1-24975 | NS_000200.1    | + | 115432978 | 115433026 |
| Sma-1-24976 | NS_000200.1    | + | 140658293 | 140658341 |
| Sma-1-24977 | NS_000200.1    | + | 294483509 | 294483557 |
| Sma-1-24978 | NS_000200.1    | + | 342509318 | 342509366 |
| Sma-1-24979 | NS_000200.1    | + | 364475447 | 364475495 |
| Sma-1-24980 | NS_000200.1    | - | 270413813 | 270413765 |
| Sma-1-24981 | NS_000200.1    | - | 259403463 | 259403415 |
| Sma-1-24982 | NS_000200.1    | - | 259086048 | 259086000 |
| Sma-1-24983 | NS_000200.1    | - | 246797696 | 246797648 |
| Sma-1-24984 | NS_000200.1    | - | 239778786 | 239778738 |
| Sma-1-24985 | NS_000200.1    | - | 230125462 | 230125414 |
| Sma-1-24986 | NS_000200.1    | - | 201875203 | 201875155 |
| Sma-1-24987 | NS_000200.1    | - | 150802612 | 150802564 |
| Sma-1-24988 | NS_000200.1    | - | 95156811  | 95156763  |
| Sma-1-24989 | NS_000200.1    | - | 78288286  | 78288238  |
| Sma-1-24990 | NS_000200.1    | - | 37375341  | 37375293  |
| Sma-1-24991 | NW_003037875.1 | + | 480906    | 480954    |
| Sma-1-24992 | NS_000200.1    | + | 120509575 | 120509623 |
| Sma-1-24993 | NW_003037876.1 | - | 256515    | 256467    |
| Sma-1-24994 | NS_000200.1    | - | 120802151 | 120802103 |
| Sma-1-24995 | NW_003021162.1 | + | 187       | 235       |
| Sma-1-24996 | NS_000200.1    | + | 371493950 | 371493998 |
| Sma-1-24997 | NW_003023518.1 | + | 1982      | 2030      |
| Sma-1-24998 | NW_003037853.1 | - | 404534    | 404486    |
| Sma-1-24999 | NS_000200.1    | + | 373554700 | 373554748 |
| Sma-1-25000 | NS_000200.1    | - | 95896585  | 95896537  |
| Sma-1-25001 | NW_003037888.1 | + | 692072    | 692120    |
| Sma-1-25002 | NS_000200.1    | + | 132900564 | 132900612 |
| Sma-1-25003 | NW_003038083.1 | + | 641509    | 641557    |
| Sma-1-25004 | NW_003038158.1 | + | 454466    | 454514    |
| Sma-1-25005 | NS_000200.1    | + | 270884846 | 270884894 |
| Sma-1-25006 | NS_000200.1    | + | 296337634 | 296337682 |
| Sma-1-25007 | NW_003026488.1 | + | 116205    | 116253    |
| Sma-1-25008 | NS_000200.1    | + | 263622699 | 263622747 |
| Sma-1-25009 | NW_003037827.1 | - | 775046    | 774998    |
| Sma-1-25010 | NS_000200.1    | - | 63397187  | 63397139  |
| Sma-1-25011 | NW_003037794.1 | - | 1717108   | 1717060   |
| Sma-1-25012 | NS_000200.1    | - | 5896703   | 5896655   |
| Sma-1-25013 | NW_003037933.1 | - | 193328    | 193280    |
| Sma-1-25014 | NS_000200.1    | - | 178606500 | 178606452 |
| Sma-1-25015 | NW_003037915.1 | - | 421380    | 421332    |

|             |                |   |           |           |
|-------------|----------------|---|-----------|-----------|
| Sma-1-25016 | NS_000200.1    | - | 162321366 | 162321318 |
| Sma-1-25017 | NW_003037810.1 | - | 768351    | 768303    |
| Sma-1-25018 | NS_000200.1    | - | 37372873  | 37372825  |
| Sma-1-25019 | NW_003037994.1 | + | 293401    | 293449    |
| Sma-1-25020 | NS_000200.1    | + | 218825215 | 218825263 |
| Sma-1-25021 | NW_003037915.1 | - | 368033    | 367985    |
| Sma-1-25022 | NS_000200.1    | - | 162268019 | 162267971 |
| Sma-1-25023 | NW_003037793.1 | + | 918640    | 918688    |
| Sma-1-25024 | NW_003037812.1 | - | 1404215   | 1404167   |
| Sma-1-25025 | NS_000200.1    | + | 918640    | 918688    |
| Sma-1-25026 | NS_000200.1    | - | 40886954  | 40886906  |
| Sma-1-25027 | NW_003026465.1 | + | 786254    | 786305    |
| Sma-1-25028 | NS_000200.1    | + | 208178848 | 208178899 |
| Sma-1-25029 | NW_003038251.1 | - | 351705    | 351657    |
| Sma-1-25030 | NS_000200.1    | - | 318683477 | 318683429 |
| Sma-1-25031 | NW_003038086.1 | - | 412813    | 412765    |
| Sma-1-25032 | NS_000200.1    | - | 272661406 | 272661358 |
| Sma-1-25033 | NW_003037939.1 | - | 84708     | 84660     |
| Sma-1-25034 | NS_000200.1    | - | 182954462 | 182954414 |
| Sma-1-25035 | NW_003037975.1 | - | 944818    | 944770    |
| Sma-1-25036 | NS_000200.1    | - | 206527042 | 206526994 |
| Sma-1-25037 | NW_003037935.1 | - | 679931    | 679883    |
| Sma-1-25038 | NS_000200.1    | - | 180096466 | 180096418 |
| Sma-1-25039 | NW_003037791.1 | - | 142679    | 142631    |
| Sma-1-25040 | NS_000200.1    | - | 381848107 | 381848059 |
| Sma-1-25041 | NW_003037962.1 | - | 13025     | 12977     |
| Sma-1-25042 | NS_000200.1    | - | 196089868 | 196089820 |
| Sma-1-25043 | NW_003031319.1 | - | 1035      | 987       |
| Sma-1-25044 | NS_000200.1    | - | 345744682 | 345744634 |
| Sma-1-25045 | NW_003037844.1 | + | 580417    | 580465    |
| Sma-1-25046 | NW_003038032.1 | + | 736461    | 736509    |
| Sma-1-25047 | NW_003038037.1 | + | 761456    | 761504    |
| Sma-1-25048 | NS_000200.1    | + | 86763863  | 86763911  |
| Sma-1-25049 | NS_000200.1    | + | 245895621 | 245895669 |
| Sma-1-25050 | NS_000200.1    | + | 250916865 | 250916913 |
| Sma-1-25051 | NW_003037891.1 | - | 1349893   | 1349845   |
| Sma-1-25052 | NS_000200.1    | - | 139231171 | 139231123 |
| Sma-1-25053 | NW_003037852.1 | - | 1070887   | 1070839   |
| Sma-1-25054 | NS_000200.1    | - | 95462782  | 95462734  |
| Sma-1-25055 | NW_003038135.1 | + | 28543     | 28591     |
| Sma-1-25056 | NS_000200.1    | + | 283900882 | 283900930 |
| Sma-1-25057 | NW_003037908.1 | - | 1000661   | 1000613   |
| Sma-1-25058 | NS_000200.1    | - | 153473792 | 153473744 |
| Sma-1-25059 | NW_003037888.1 | + | 622483    | 622531    |
| Sma-1-25060 | NS_000200.1    | + | 132830975 | 132831023 |
| Sma-1-25061 | NW_003037863.1 | + | 1322944   | 1322992   |
| Sma-1-25062 | NS_000200.1    | + | 108081311 | 108081359 |
| Sma-1-25063 | NW_003038227.1 | - | 24507     | 24459     |
| Sma-1-25064 | NS_000200.1    | - | 310305861 | 310305813 |
| Sma-1-25065 | NW_003038158.1 | + | 56755     | 56803     |
| Sma-1-25066 | NS_000200.1    | + | 295939923 | 295939971 |
| Sma-1-25067 | NW_003026469.1 | - | 23024     | 22976     |

|             |                |   |           |           |
|-------------|----------------|---|-----------|-----------|
| Sma-1-25068 | NW_003037800.1 | + | 42214     | 42262     |
| Sma-1-25069 | NW_003037800.1 | + | 2061108   | 2061156   |
| Sma-1-25070 | NS_000200.1    | + | 18671574  | 18671622  |
| Sma-1-25071 | NS_000200.1    | + | 20690468  | 20690516  |
| Sma-1-25072 | NS_000200.1    | - | 217644683 | 217644635 |
| Sma-1-25073 | NW_003037853.1 | - | 625901    | 625853    |
| Sma-1-25074 | NS_000200.1    | - | 96117952  | 96117904  |
| Sma-1-25075 | NW_003037992.1 | - | 197976    | 197928    |
| Sma-1-25076 | NS_000200.1    | - | 218039457 | 218039409 |
| Sma-1-25077 | NW_003031752.1 | + | 252       | 300       |
| Sma-1-25078 | NW_003037838.1 | - | 664126    | 664078    |
| Sma-1-25079 | NS_000200.1    | + | 366945215 | 366945263 |
| Sma-1-25080 | NS_000200.1    | - | 78662689  | 78662641  |
| Sma-1-25081 | NW_003037838.1 | + | 642209    | 642257    |
| Sma-1-25082 | NS_000200.1    | + | 78640772  | 78640820  |
| Sma-1-25083 | NW_003037896.1 | - | 153469    | 153421    |
| Sma-1-25084 | NS_000200.1    | - | 143073892 | 143073844 |
| Sma-1-25085 | NW_003020356.1 | + | 312       | 360       |
| Sma-1-25086 | NW_003020356.1 | + | 1489      | 1537      |
| Sma-1-25087 | NW_003037039.1 | - | 714       | 666       |
| Sma-1-25088 | NW_003037944.1 | - | 56430     | 56382     |
| Sma-1-25089 | NS_000200.1    | + | 354962711 | 354962759 |
| Sma-1-25090 | NS_000200.1    | + | 354963888 | 354963936 |
| Sma-1-25091 | NS_000200.1    | - | 343714855 | 343714807 |
| Sma-1-25092 | NS_000200.1    | - | 188277783 | 188277735 |
| Sma-1-25093 | NW_003026616.1 | + | 167739    | 167787    |
| Sma-1-25094 | NS_000200.1    | + | 317524338 | 317524386 |
| Sma-1-25095 | NW_003037771.1 | - | 128660    | 128612    |
| Sma-1-25096 | NS_000200.1    | - | 378429566 | 378429518 |
| Sma-1-25097 | NW_003026611.1 | - | 149248    | 149200    |
| Sma-1-25098 | NS_000200.1    | - | 310719032 | 310718984 |
| Sma-1-25099 | NW_003037827.1 | + | 1139189   | 1139237   |
| Sma-1-25100 | NS_000200.1    | + | 63761330  | 63761378  |
| Sma-1-25101 | NW_003037886.1 | + | 777320    | 777368    |
| Sma-1-25102 | NS_000200.1    | + | 130032887 | 130032935 |
| Sma-1-25103 | NW_003026472.1 | + | 79236     | 79284     |
| Sma-1-25104 | NW_003037902.1 | + | 28946     | 28994     |
| Sma-1-25105 | NS_000200.1    | + | 146784180 | 146784228 |
| Sma-1-25106 | NS_000200.1    | + | 236491228 | 236491276 |
| Sma-1-25107 | NW_003026516.1 | - | 140601    | 140553    |
| Sma-1-25108 | NS_000200.1    | - | 299248898 | 299248850 |
| Sma-1-25109 | NW_003038161.1 | - | 96664     | 96616     |
| Sma-1-25110 | NS_000200.1    | - | 297466515 | 297466467 |
| Sma-1-25111 | NW_003038455.1 | + | 10706     | 10754     |
| Sma-1-25112 | NS_000200.1    | + | 330792757 | 330792805 |
| Sma-1-25113 | NW_003030280.1 | + | 153       | 201       |
| Sma-1-25114 | NW_003038511.1 | - | 102300    | 102252    |
| Sma-1-25115 | NW_003026471.1 | - | 117077    | 117029    |
| Sma-1-25116 | NW_003038000.1 | + | 70568     | 70616     |
| Sma-1-25117 | NW_003026465.1 | + | 656763    | 656811    |
| Sma-1-25118 | NW_003035688.1 | + | 25996     | 26044     |
| Sma-1-25119 | NW_003037799.1 | - | 1524131   | 1524083   |

|             |                |   |           |           |
|-------------|----------------|---|-----------|-----------|
| Sma-1-25120 | NW_003037799.1 | - | 636011    | 635963    |
| Sma-1-25121 | NW_003037814.1 | - | 1877075   | 1877027   |
| Sma-1-25122 | NW_003037823.1 | + | 993668    | 993716    |
| Sma-1-25123 | NW_003037838.1 | - | 547093    | 547045    |
| Sma-1-25124 | NW_003037839.1 | - | 708704    | 708656    |
| Sma-1-25125 | NW_003037841.1 | + | 298795    | 298843    |
| Sma-1-25126 | NW_003037857.1 | - | 140149    | 140101    |
| Sma-1-25127 | NW_003037859.1 | + | 840640    | 840688    |
| Sma-1-25128 | NW_003037881.1 | - | 467439    | 467391    |
| Sma-1-25129 | NW_003037942.1 | - | 294928    | 294880    |
| Sma-1-25130 | NW_003038018.1 | + | 334743    | 334791    |
| Sma-1-25131 | NW_003038027.1 | + | 142348    | 142396    |
| Sma-1-25132 | NW_003038518.1 | + | 62879     | 62927     |
| Sma-1-25133 | NW_003038518.1 | + | 136853    | 136901    |
| Sma-1-25134 | NW_003026517.1 | - | 620724    | 620676    |
| Sma-1-25135 | NW_003038083.1 | + | 206776    | 206824    |
| Sma-1-25136 | NW_003038084.1 | + | 175822    | 175870    |
| Sma-1-25137 | NW_003038084.1 | + | 584174    | 584222    |
| Sma-1-25138 | NW_003038091.1 | + | 4138      | 4186      |
| Sma-1-25139 | NW_003038128.1 | + | 73664     | 73712     |
| Sma-1-25140 | NW_003038161.1 | - | 356415    | 356367    |
| Sma-1-25141 | NS_000200.1    | + | 56910287  | 56910335  |
| Sma-1-25142 | NS_000200.1    | + | 82909976  | 82910024  |
| Sma-1-25143 | NS_000200.1    | + | 103519481 | 103519529 |
| Sma-1-25144 | NS_000200.1    | + | 208049357 | 208049405 |
| Sma-1-25145 | NS_000200.1    | + | 222541346 | 222541394 |
| Sma-1-25146 | NS_000200.1    | + | 232735593 | 232735641 |
| Sma-1-25147 | NS_000200.1    | + | 240513062 | 240513110 |
| Sma-1-25148 | NS_000200.1    | + | 270450113 | 270450161 |
| Sma-1-25149 | NS_000200.1    | + | 271191066 | 271191114 |
| Sma-1-25150 | NS_000200.1    | + | 271599418 | 271599466 |
| Sma-1-25151 | NS_000200.1    | + | 273943697 | 273943745 |
| Sma-1-25152 | NS_000200.1    | + | 280791952 | 280792000 |
| Sma-1-25153 | NS_000200.1    | + | 332928474 | 332928522 |
| Sma-1-25154 | NS_000200.1    | + | 341699712 | 341699760 |
| Sma-1-25155 | NS_000200.1    | + | 341773686 | 341773734 |
| Sma-1-25156 | NS_000200.1    | + | 362566846 | 362566894 |
| Sma-1-25157 | NS_000200.1    | - | 338447512 | 338447464 |
| Sma-1-25158 | NS_000200.1    | - | 300226733 | 300226685 |
| Sma-1-25159 | NS_000200.1    | - | 297726266 | 297726218 |
| Sma-1-25160 | NS_000200.1    | - | 222229310 | 222229262 |
| Sma-1-25161 | NS_000200.1    | - | 186054836 | 186054788 |
| Sma-1-25162 | NS_000200.1    | - | 124899230 | 124899182 |
| Sma-1-25163 | NS_000200.1    | - | 100160506 | 100160458 |
| Sma-1-25164 | NS_000200.1    | - | 79666854  | 79666806  |
| Sma-1-25165 | NS_000200.1    | - | 78545656  | 78545608  |
| Sma-1-25166 | NS_000200.1    | - | 44860935  | 44860887  |
| Sma-1-25167 | NS_000200.1    | - | 18514485  | 18514437  |
| Sma-1-25168 | NS_000200.1    | - | 17626365  | 17626317  |
| Sma-1-25169 | NW_003027990.1 | - | 788       | 740       |
| Sma-1-25170 | NW_003037830.1 | - | 245175    | 245127    |
| Sma-1-25171 | NS_000200.1    | - | 369125906 | 369125858 |



|             |                |   |           |           |
|-------------|----------------|---|-----------|-----------|
| Sma-1-25172 | NS.000200.1    | - | 68135546  | 68135498  |
| Sma-1-25173 | NW_003037962.1 | - | 536946    | 536898    |
| Sma-1-25174 | NS.000200.1    | - | 196613789 | 196613741 |
| Sma-1-25175 | NW_003037937.1 | - | 315184    | 315136    |
| Sma-1-25176 | NS.000200.1    | - | 181515093 | 181515045 |
| Sma-1-25177 | NW_003037794.1 | + | 685104    | 685152    |
| Sma-1-25178 | NS.000200.1    | + | 4864699   | 4864747   |
| Sma-1-25179 | NW_003037779.1 | - | 45088     | 45040     |
| Sma-1-25180 | NW_003037854.1 | - | 77986     | 77938     |
| Sma-1-25181 | NW_003037878.1 | - | 157171    | 157123    |
| Sma-1-25182 | NS.000200.1    | - | 378996250 | 378996202 |
| Sma-1-25183 | NS.000200.1    | - | 122210649 | 122210601 |
| Sma-1-25184 | NS.000200.1    | - | 96982407  | 96982359  |
| Sma-1-25185 | NW_003026466.1 | + | 59418     | 59466     |
| Sma-1-25186 | NS.000200.1    | + | 215326525 | 215326573 |
| Sma-1-25187 | NW_003037890.1 | + | 1966631   | 1966679   |
| Sma-1-25188 | NS.000200.1    | + | 137649992 | 137650040 |
| Sma-1-25189 | NW_003037858.1 | - | 487908    | 487860    |
| Sma-1-25190 | NS.000200.1    | - | 101152184 | 101152136 |
| Sma-1-25191 | NW_003030461.1 | + | 1493      | 1541      |
| Sma-1-25192 | NS.000200.1    | + | 362959102 | 362959150 |
| Sma-1-25193 | NW_003037797.1 | - | 2649410   | 2649362   |
| Sma-1-25194 | NS.000200.1    | - | 13077270  | 13077222  |
| Sma-1-25195 | NW_003036241.1 | + | 1741      | 1789      |
| Sma-1-25196 | NS.000200.1    | + | 347591435 | 347591483 |
| Sma-1-25197 | NW_003037943.1 | + | 748164    | 748212    |
| Sma-1-25198 | NS.000200.1    | + | 187769697 | 187769745 |
| Sma-1-25199 | NW_003037823.1 | - | 678211    | 678163    |
| Sma-1-25200 | NS.000200.1    | - | 56594830  | 56594782  |
| Sma-1-25201 | NW_003026458.1 | + | 379222    | 379270    |
| Sma-1-25202 | NS.000200.1    | + | 102247452 | 102247500 |
| Sma-1-25203 | NW_003037894.1 | + | 382565    | 382613    |
| Sma-1-25204 | NS.000200.1    | + | 142279138 | 142279186 |
| Sma-1-25205 | NW_003037891.1 | + | 642918    | 642966    |
| Sma-1-25206 | NS.000200.1    | + | 138524196 | 138524244 |
| Sma-1-25207 | NW_003037891.1 | - | 2801088   | 2801040   |
| Sma-1-25208 | NS.000200.1    | - | 140682366 | 140682318 |
| Sma-1-25209 | NW_003032675.1 | - | 857       | 809       |
| Sma-1-25210 | NW_003037792.1 | + | 455340    | 455388    |
| Sma-1-25211 | NW_003037792.1 | - | 20134     | 20086     |
| Sma-1-25212 | NW_003037822.1 | - | 1366759   | 1366711   |
| Sma-1-25213 | NW_003037825.1 | + | 1375635   | 1375683   |
| Sma-1-25214 | NW_003037840.1 | - | 629318    | 629270    |
| Sma-1-25215 | NW_003038086.1 | - | 696251    | 696203    |
| Sma-1-25216 | NS.000200.1    | + | 60505417  | 60505465  |
| Sma-1-25217 | NS.000200.1    | + | 382892684 | 382892732 |
| Sma-1-25218 | NS.000200.1    | - | 382457478 | 382457430 |
| Sma-1-25219 | NS.000200.1    | - | 350599895 | 350599847 |
| Sma-1-25220 | NS.000200.1    | - | 272944844 | 272944796 |
| Sma-1-25221 | NS.000200.1    | - | 81252642  | 81252594  |
| Sma-1-25222 | NS.000200.1    | - | 55674765  | 55674717  |
| Sma-1-25223 | NW_003031783.1 | - | 74        | 26        |

|             |                |   |           |           |
|-------------|----------------|---|-----------|-----------|
| Sma-1-25224 | NS_000200.1    | - | 367005282 | 367005234 |
| Sma-1-25225 | NW_003037890.1 | + | 2187189   | 2187237   |
| Sma-1-25226 | NS_000200.1    | + | 137870550 | 137870598 |
| Sma-1-25227 | NW_003026512.1 | + | 246790    | 246838    |
| Sma-1-25228 | NS_000200.1    | + | 285340830 | 285340878 |
| Sma-1-25229 | NW_003035818.1 | + | 2001      | 2049      |
| Sma-1-25230 | NW_003037884.1 | - | 699040    | 698992    |
| Sma-1-25231 | NS_000200.1    | + | 364157428 | 364157476 |
| Sma-1-25232 | NS_000200.1    | - | 127478705 | 127478657 |
| Sma-1-25233 | NW_003037918.1 | - | 2034692   | 2034644   |
| Sma-1-25234 | NS_000200.1    | - | 168601682 | 168601634 |
| Sma-1-25235 | NW_003035475.1 | - | 486       | 438       |
| Sma-1-25236 | NW_003037919.1 | + | 225885    | 225933    |
| Sma-1-25237 | NS_000200.1    | + | 169083814 | 169083862 |
| Sma-1-25238 | NS_000200.1    | - | 367529107 | 367529059 |
| Sma-1-25239 | NW_003037829.1 | + | 249581    | 249629    |
| Sma-1-25240 | NS_000200.1    | + | 66150119  | 66150167  |
| Sma-1-25241 | NW_003038137.1 | + | 282204    | 282252    |
| Sma-1-25242 | NS_000200.1    | + | 285071100 | 285071148 |
| Sma-1-25243 | NW_003026609.1 | + | 164945    | 164993    |
| Sma-1-25244 | NS_000200.1    | + | 309819937 | 309819985 |
| Sma-1-25245 | NW_003038024.1 | + | 206146    | 206194    |
| Sma-1-25246 | NS_000200.1    | + | 238103175 | 238103223 |
| Sma-1-25247 | NW_003037980.1 | + | 1152861   | 1152909   |
| Sma-1-25248 | NS_000200.1    | + | 212113723 | 212113771 |
| Sma-1-25249 | NW_003037911.1 | + | 723790    | 723838    |
| Sma-1-25250 | NS_000200.1    | + | 156511143 | 156511191 |
| Sma-1-25251 | NW_003034807.1 | + | 471       | 519       |
| Sma-1-25252 | NW_003037831.1 | - | 360840    | 360792    |
| Sma-1-25253 | NW_003037880.1 | + | 343220    | 343268    |
| Sma-1-25254 | NS_000200.1    | + | 124026778 | 124026826 |
| Sma-1-25255 | NS_000200.1    | + | 347019908 | 347019956 |
| Sma-1-25256 | NS_000200.1    | - | 69810142  | 69810094  |
| Sma-1-25257 | NW_003037806.1 | + | 1257345   | 1257393   |
| Sma-1-25258 | NW_003038515.1 | + | 403155    | 403203    |
| Sma-1-25259 | NS_000200.1    | + | 29452559  | 29452607  |
| Sma-1-25260 | NS_000200.1    | + | 340487220 | 340487268 |
| Sma-1-25261 | NW_003037921.1 | + | 71754     | 71802     |
| Sma-1-25262 | NS_000200.1    | + | 169601889 | 169601937 |
| Sma-1-25263 | NW_003038014.1 | + | 84104     | 84152     |
| Sma-1-25264 | NW_003039127.1 | + | 1542514   | 1542562   |
| Sma-1-25265 | NS_000200.1    | + | 114620013 | 114620061 |
| Sma-1-25266 | NS_000200.1    | + | 229824793 | 229824841 |
| Sma-1-25267 | NW_003037973.1 | + | 563305    | 563353    |
| Sma-1-25268 | NS_000200.1    | + | 204545032 | 204545080 |
| Sma-1-25269 | NW_003037887.1 | - | 267745    | 267698    |
| Sma-1-25270 | NS_000200.1    | - | 130731723 | 130731676 |
| Sma-1-25271 | NW_003038242.1 | - | 191260    | 191213    |
| Sma-1-25272 | NS_000200.1    | - | 314890406 | 314890359 |
| Sma-1-25273 | NW_003025230.1 | + | 1042      | 1089      |
| Sma-1-25274 | NS_000200.1    | + | 361440300 | 361440347 |
| Sma-1-25275 | NW_003038237.1 | + | 163075    | 163123    |

|             |                |   |           |           |
|-------------|----------------|---|-----------|-----------|
| Sma-1-25276 | NS_000200.1    | + | 313602994 | 313603042 |
| Sma-1-25277 | NW_003039127.1 | + | 2112991   | 2113039   |
| Sma-1-25278 | NW_003039127.1 | - | 2116540   | 2116492   |
| Sma-1-25279 | NS_000200.1    | + | 115190490 | 115190538 |
| Sma-1-25280 | NS_000200.1    | - | 115194039 | 115193991 |
| env-94      | AF036402.1     | + | 123       | 167       |
| env-95      | AF036399.1     | + | 123       | 167       |
| env-96      | AF036404.1     | + | 122       | 166       |
| env-97      | AF036400.1     | + | 123       | 167       |
| Sma-1-25281 | NW_003037809.1 | - | 2492623   | 2492572   |
| Sma-1-25282 | NS_000200.1    | - | 36157087  | 36157036  |
| Sma-1-25283 | NW_003038010.1 | - | 165664    | 165613    |
| Sma-1-25284 | NS_000200.1    | - | 226983887 | 226983836 |
| Sma-1-25285 | NW_003037881.1 | - | 437681    | 437630    |
| Sma-1-25286 | NS_000200.1    | - | 124869472 | 124869421 |
| Sma-1-25287 | NW_003037841.1 | + | 1315978   | 1316029   |
| Sma-1-25288 | NS_000200.1    | + | 83927159  | 83927210  |
| Sma-1-25289 | NW_003037940.1 | - | 57779     | 57728     |
| Sma-1-25290 | NS_000200.1    | - | 183799909 | 183799858 |
| Sma-1-25291 | NW_003037783.1 | + | 30556     | 30607     |
| Sma-1-25292 | NS_000200.1    | + | 379764160 | 379764211 |
| Sma-1-25293 | NW_003037829.1 | + | 1117717   | 1117766   |
| Sma-1-25294 | NS_000200.1    | + | 67018255  | 67018304  |
| Sma-1-25295 | NW_003037791.1 | + | 147585    | 147634    |
| Sma-1-25296 | NS_000200.1    | + | 381853013 | 381853062 |
| Sma-1-25297 | NW_003038133.1 | + | 36308     | 36357     |
| Sma-1-25298 | NS_000200.1    | + | 282908490 | 282908539 |
| Sma-1-25299 | NW_003037827.1 | + | 1423833   | 1423881   |
| Sma-1-25300 | NS_000200.1    | + | 64045974  | 64046022  |
| Sma-1-25301 | NW_003037797.1 | + | 42429     | 42477     |
| Sma-1-25302 | NS_000200.1    | + | 10470289  | 10470337  |
| Sma-1-25303 | NW_003038026.1 | - | 554048    | 554001    |
| Sma-1-25304 | NS_000200.1    | - | 240061809 | 240061762 |
| Sma-1-25305 | NW_003037826.1 | + | 1159507   | 1159554   |
| Sma-1-25306 | NS_000200.1    | + | 62159023  | 62159070  |
| Sma-1-25307 | NW_003037852.1 | - | 626159    | 626112    |
| Sma-1-25308 | NS_000200.1    | - | 95018054  | 95018007  |
| Sma-1-25309 | NW_003037884.1 | + | 861586    | 861632    |
| Sma-1-25310 | NS_000200.1    | + | 127641251 | 127641297 |
| Sma-1-25311 | NW_003038002.1 | + | 10203     | 10249     |
| Sma-1-25312 | NS_000200.1    | + | 223130412 | 223130458 |
| Sma-1-25313 | NW_003038251.1 | - | 92092     | 92041     |
| Sma-1-25314 | NS_000200.1    | - | 318423864 | 318423813 |
| Sma-1-25315 | NW_003038149.1 | - | 422787    | 422736    |
| Sma-1-25316 | NS_000200.1    | - | 291451400 | 291451349 |
| Sma-1-25317 | NW_003037796.1 | - | 2006571   | 2006521   |
| Sma-1-25318 | NS_000200.1    | - | 10216215  | 10216165  |
| Sma-1-25319 | NW_003037906.1 | - | 470462    | 470413    |
| Sma-1-25320 | NS_000200.1    | - | 150778241 | 150778192 |
| Sma-1-25321 | NW_003038032.1 | + | 682795    | 682844    |
| Sma-1-25322 | NS_000200.1    | + | 245841955 | 245842004 |
| Sma-1-25323 | NW_003037918.1 | - | 140067    | 140018    |

|             |                              |   |           |           |
|-------------|------------------------------|---|-----------|-----------|
| Sma-1-25324 | NS.000200.1                  | - | 166707057 | 166707008 |
| Sma-1-25325 | NW_003037918.1               | + | 131685    | 131734    |
| Sma-1-25326 | NS.000200.1                  | + | 166698675 | 166698724 |
| Sma-1-25327 | NW_003037839.1               | - | 1503313   | 1503264   |
| Sma-1-25328 | NS.000200.1                  | - | 80461463  | 80461414  |
| Sma-1-25329 | NW_003038075.1               | + | 82        | 131       |
| Sma-1-25330 | NS.000200.1                  | + | 266118293 | 266118342 |
| Sma-1-25331 | NW_003037791.1               | - | 432898    | 432847    |
| Sma-1-25332 | NS.000200.1                  | - | 382138326 | 382138275 |
| Sma-1-25333 | NW_003037873.1               | + | 14522     | 14569     |
| Sma-1-25334 | NS.000200.1                  | + | 118753650 | 118753697 |
| Sma-1-25335 | NW_003038148.1               | - | 519979    | 519931    |
| Sma-1-25336 | NS.000200.1                  | - | 290593963 | 290593915 |
| Sma-1-25337 | NW_003037888.1               | - | 41794     | 41745     |
| Sma-1-25338 | NS.000200.1                  | - | 132250286 | 132250237 |
| Sma-1-25339 | NW_003037930.1               | - | 780769    | 780721    |
| Sma-1-25340 | NS.000200.1                  | - | 176638733 | 176638685 |
| Sma-1-25341 | NW_003037807.1               | - | 417071    | 417025    |
| Sma-1-25342 | NS.000200.1                  | - | 30678587  | 30678541  |
| env-98      | AF036398.1                   | + | 58        | 102       |
| Sma-1-25343 | NW_003038124.1               | + | 231681    | 231729    |
| Sma-1-25344 | NS.000200.1                  | + | 279224325 | 279224373 |
| Sma-1-25345 | NW_003037838.1               | - | 334342    | 334279    |
| Sma-1-25346 | NS.000200.1                  | - | 78332905  | 78332842  |
| Sma-1-25347 | NW_003038238.1               | + | 96992     | 97069     |
| Sma-1-25348 | NS.000200.1                  | + | 313703773 | 313703850 |
| Nve-1-472   | NW_001834397.1               | + | 1045121   | 1045175   |
| env-99      | JCVLSCAF_1096627289312       | + | 327       | 451       |
| env-100     | JCVLSCAF_1096627755477       | - | 1322      | 1276      |
| env-101     | JCVLSCAF_1096628364820       | - | 116       | 70        |
| env-102     | NCBI_BBAY_READ_1106105143237 | - | 939       | 884       |
| env-103     | JCVLSCAF_1096627869476       | - | 1185      | 1130      |
| env-104     | JCVLSCAF_1101668008592       | - | 195       | 142       |
| env-105     | JCVLSCAF_1101668008592       | - | 1148      | 1095      |
| env-106     | JCVLSCAF_1101668008592       | - | 781       | 728       |
| env-107     | ALVINELLA_READ_1878650945    | + | 36        | 82        |
| env-108     | ALVINELLA_READ_1878688557    | + | 601       | 646       |
| env-109     | ALVINELLA_READ_1878673005    | - | 379       | 332       |
| env-110     | ALVINELLA_READ_1878573841    | + | 389       | 435       |
| env-111     | ALVINELLA_READ_1878554883    | + | 46        | 92        |
| env-112     | ALVINELLA_READ_1878617291    | + | 441       | 487       |
| env-113     | ALVINELLA_READ_1878651869    | + | 488       | 534       |
| env-114     | ALVINELLA_READ_1878678796    | + | 496       | 542       |
| env-115     | ALVINELLA_READ_1878518601    | + | 234       | 280       |
| env-116     | ALVINELLA_READ_1878691276    | + | 217       | 263       |
| env-117     | ALVINELLA_READ_1878443912    | + | 86        | 132       |
| env-118     | ALVINELLA_READ_1878701031    | + | 336       | 382       |
| env-119     | ALVINELLA_READ_1878600291    | + | 38        | 84        |
| env-120     | ALVINELLA_READ_1878665302    | + | 672       | 720       |
| env-121     | NCBI_BBAY_READ_1106850418211 | - | 745       | 697       |
| Tca-1-14    | NW_001094318.1               | + | 62683     | 62728     |
| env-122     | AAMC01022016.1               | - | 20797     | 20756     |

|         |                |   |       |       |
|---------|----------------|---|-------|-------|
| env-123 | AAMC01032538.1 | + | 14077 | 14119 |
| env-124 | AAMC01119286.1 | - | 24154 | 24113 |
| env-125 | AAMC01105789.1 | - | 1966  | 1925  |
| env-126 | AAMC01064751.1 | + | 7282  | 7323  |
| env-127 | AAMC01150818.1 | - | 1193  | 1151  |
| env-128 | AAMC01112992.1 | - | 5427  | 5385  |
| env-129 | AAMC01106794.1 | - | 13377 | 13335 |
| env-130 | AAMC01060971.1 | + | 4170  | 4212  |
| env-131 | AAMC01045075.1 | + | 21328 | 21370 |
| env-132 | AAMC01044369.1 | - | 25956 | 25914 |
| env-133 | AAMC01038390.1 | + | 287   | 329   |
| env-134 | AAMC01038390.1 | + | 553   | 595   |
| env-135 | AAMC01024578.1 | - | 11624 | 11582 |
| env-136 | AAMC01013308.1 | - | 3326  | 3284  |
| env-137 | AAMC01013199.1 | - | 3768  | 3726  |
| env-138 | AAMC01008676.1 | + | 20113 | 20155 |
| env-139 | AAMC01006953.1 | + | 42502 | 42544 |
| env-140 | AAMC01044441.1 | + | 13006 | 13048 |
| env-141 | AAMC01010361.1 | - | 3439  | 3397  |
| env-142 | AAMC01097028.1 | - | 13512 | 13472 |
| env-143 | AAMC01039721.1 | - | 485   | 445   |
| env-144 | AAMC01091277.1 | - | 7121  | 7081  |
| env-145 | AAMC01145184.1 | - | 1094  | 1053  |
| env-146 | AAMC01134896.1 | + | 6769  | 6810  |
| env-147 | AAMC01022403.1 | + | 21798 | 21839 |
| env-148 | AAMC01131716.1 | + | 1789  | 1831  |
| env-149 | AAMC01128868.1 | + | 3353  | 3394  |
| env-150 | AAMC01118869.1 | + | 387   | 428   |
| env-151 | AAMC01113202.1 | + | 61    | 102   |
| env-152 | AAMC01105789.1 | - | 2539  | 2498  |
| env-153 | AAMC01102498.1 | - | 10532 | 10491 |
| env-154 | AAMC01030396.1 | + | 3010  | 3051  |
| env-155 | AAMC01085569.1 | - | 10976 | 10935 |
| env-156 | AAMC01115073.1 | - | 4234  | 4193  |
| env-157 | AAMC01097034.1 | + | 26267 | 26308 |
| env-158 | AAMC01097034.1 | - | 26101 | 26060 |
| env-159 | AAMC01099511.1 | - | 12719 | 12678 |
| env-160 | AAMC01097952.1 | - | 17828 | 17787 |
| env-161 | AAMC01027799.1 | - | 13352 | 13311 |
| env-162 | AAMC01099526.1 | - | 28471 | 28430 |
| env-163 | AAMC01092595.1 | + | 6709  | 6750  |
| env-164 | AAMC01084679.1 | + | 25725 | 25766 |
| env-165 | AAMC01000412.1 | - | 66937 | 66895 |
| env-166 | AAMC01000504.1 | + | 688   | 730   |
| env-167 | AAMC01011783.1 | - | 3908  | 3867  |
| env-168 | AAMC01050768.1 | - | 8078  | 8037  |
| env-169 | AAMC01080264.1 | + | 37272 | 37313 |
| env-170 | AAMC01065649.1 | + | 58    | 99    |
| env-171 | AAMC01065648.1 | - | 4859  | 4818  |
| env-172 | AAMC01064830.1 | - | 6994  | 6953  |
| env-173 | AAMC01008353.1 | + | 27216 | 27258 |
| env-174 | AAMC01084329.1 | - | 8995  | 8954  |

|         |                |   |       |       |
|---------|----------------|---|-------|-------|
| env-175 | AAMC01048972.1 | + | 5091  | 5132  |
| env-176 | AAMC01039278.1 | + | 10815 | 10856 |
| env-177 | AAMC01033430.1 | - | 326   | 285   |
| env-178 | AAMC01026504.1 | + | 1352  | 1393  |
| env-179 | AAMC01025780.1 | - | 14715 | 14673 |
| env-180 | AAMC01018534.1 | - | 4889  | 4848  |
| env-181 | AAMC01056829.1 | - | 6375  | 6334  |
| env-182 | AAMC01015602.1 | - | 7055  | 7014  |
| env-183 | AAMC01156781.1 | + | 3386  | 3427  |
| env-184 | AAMC01004340.1 | + | 11370 | 11411 |
| env-185 | AAMC01003204.1 | - | 23629 | 23588 |
| env-186 | AAMC01115196.1 | + | 2142  | 2184  |
| env-187 | AAMC01140161.1 | - | 848   | 806   |
| env-188 | AAMC01167915.1 | - | 3977  | 3935  |
| env-189 | AAMC01190753.1 | - | 1009  | 967   |
| env-190 | AAMC01141856.1 | - | 2126  | 2084  |
| env-191 | AAMC01140629.1 | - | 1209  | 1167  |
| env-192 | AAMC01140629.1 | - | 668   | 626   |
| env-193 | AAMC01140629.1 | - | 127   | 85    |
| env-194 | AAMC01104645.1 | - | 10624 | 10582 |
| env-195 | AAMC01098835.1 | + | 33279 | 33321 |
| env-196 | AAMC01098838.1 | + | 149   | 191   |
| env-197 | AAMC01080061.1 | + | 6242  | 6284  |
| env-198 | AAMC01077408.1 | - | 2995  | 2953  |
| env-199 | AAMC01060953.1 | - | 351   | 309   |
| env-200 | AAMC01010885.1 | - | 9121  | 9079  |
| env-201 | AAMC01054043.1 | + | 846   | 888   |
| env-202 | AAMC01017092.1 | - | 18685 | 18643 |
| env-203 | AAMC01035689.1 | + | 8913  | 8955  |
| env-204 | AAMC01104142.1 | - | 2836  | 2794  |
| env-205 | AAMC01017643.1 | - | 1330  | 1288  |
| env-206 | AAMC01008982.1 | + | 1966  | 2008  |
| env-207 | AAMC01001723.1 | + | 18051 | 18093 |
| env-208 | AAMC01083573.1 | - | 12551 | 12509 |
| env-209 | AAMC01095194.1 | + | 27605 | 27647 |
| env-210 | AAMC01000594.1 | - | 2276  | 2234  |
| env-211 | AAMC01004780.1 | - | 18146 | 18104 |
| env-212 | AAMC01011179.1 | - | 13402 | 13360 |
| env-213 | AAMC01011179.1 | - | 13139 | 13097 |
| env-214 | AAMC01014574.1 | - | 2096  | 2054  |
| env-215 | AAMC01020983.1 | - | 2560  | 2518  |
| env-216 | AAMC01036569.1 | + | 11274 | 11316 |
| env-217 | AAMC01041125.1 | - | 27002 | 26960 |
| env-218 | AAMC01042344.1 | - | 2314  | 2272  |
| env-219 | AAMC01046861.1 | + | 6048  | 6090  |
| env-220 | AAMC01048514.1 | - | 7078  | 7036  |
| env-221 | AAMC01072515.1 | + | 159   | 201   |
| env-222 | AAMC01082747.1 | + | 18201 | 18243 |
| env-223 | AAMC01083624.1 | - | 7644  | 7602  |
| env-224 | AAMC01090569.1 | + | 5102  | 5144  |
| env-225 | AAMC01094959.1 | - | 9447  | 9405  |
| env-226 | AAMC01109753.1 | + | 5763  | 5805  |

|         |                |   |       |       |
|---------|----------------|---|-------|-------|
| env-227 | AAMC01111876.1 | + | 5589  | 5631  |
| env-228 | AAMC01112903.1 | - | 3577  | 3535  |
| env-229 | AAMC01000808.1 | + | 37844 | 37886 |
| env-230 | AAMC01059828.1 | + | 7311  | 7353  |
| env-231 | AAMC01165124.1 | - | 1147  | 1105  |
| env-232 | AAMC01038925.1 | + | 253   | 295   |
| env-233 | AAMC01038984.1 | - | 5485  | 5443  |
| env-234 | AAMC01065800.1 | + | 2636  | 2678  |
| env-235 | AAMC01065803.1 | + | 1158  | 1200  |
| env-236 | AAMC01069250.1 | - | 37067 | 37025 |
| env-237 | AAMC01042570.1 | - | 4852  | 4810  |
| env-238 | AAMC01071358.1 | - | 847   | 805   |
| env-239 | AAMC01074735.1 | - | 10911 | 10869 |
| env-240 | AAMC01074735.1 | - | 7666  | 7624  |
| env-241 | AAMC01093138.1 | + | 20986 | 21028 |
| env-242 | AAMC01047568.1 | + | 7808  | 7850  |
| env-243 | AAMC01062343.1 | - | 7185  | 7143  |
| env-244 | AAMC01056398.1 | + | 54078 | 54120 |
| env-245 | AAMC01111912.1 | + | 8175  | 8217  |
| env-246 | AAMC01114550.1 | - | 7323  | 7281  |
| env-247 | AAMC01114551.1 | - | 1043  | 1001  |
| env-248 | AAMC01038953.1 | - | 5300  | 5258  |
| env-249 | AAMC01049610.1 | + | 557   | 599   |
| env-250 | AAMC01129716.1 | - | 6805  | 6763  |
| env-251 | AAMC01127315.1 | - | 2424  | 2382  |
| env-252 | AAMC01120168.1 | - | 19273 | 19231 |
| env-253 | AAMC01116604.1 | - | 2871  | 2829  |
| env-254 | AAMC01113646.1 | + | 5505  | 5547  |
| env-255 | AAMC01112160.1 | + | 15845 | 15887 |
| env-256 | AAMC01110099.1 | + | 1075  | 1117  |
| env-257 | AAMC01108600.1 | - | 28082 | 28040 |
| env-258 | AAMC01107866.1 | + | 5532  | 5574  |
| env-259 | AAMC01100204.1 | + | 263   | 305   |
| env-260 | AAMC01093665.1 | - | 267   | 225   |
| env-261 | AAMC01150818.1 | - | 1625  | 1583  |
| env-262 | AAMC01092129.1 | - | 2609  | 2567  |
| env-263 | AAMC01101406.1 | - | 11373 | 11331 |
| env-264 | AAMC01089558.1 | + | 11620 | 11662 |
| env-265 | AAMC01083081.1 | + | 2444  | 2486  |
| env-266 | AAMC01172710.1 | - | 277   | 235   |
| env-267 | AAMC01068245.1 | - | 11877 | 11835 |
| env-268 | AAMC01001723.1 | - | 17795 | 17753 |
| env-269 | AAMC01002429.1 | - | 4538  | 4496  |
| env-270 | AAMC01005414.1 | + | 41337 | 41379 |
| env-271 | AAMC01017303.1 | + | 10765 | 10807 |
| env-272 | AAMC01017644.1 | + | 58    | 100   |
| env-273 | AAMC01022881.1 | + | 22265 | 22307 |
| env-274 | AAMC01035455.1 | - | 8028  | 7986  |
| env-275 | AAMC01043548.1 | - | 3884  | 3842  |
| env-276 | AAMC01047488.1 | - | 3550  | 3508  |
| env-277 | AAMC01048837.1 | - | 4681  | 4639  |
| env-278 | AAMC01048948.1 | + | 13858 | 13900 |

|         |                |   |       |       |
|---------|----------------|---|-------|-------|
| env-279 | AAMC01084388.1 | + | 6133  | 6175  |
| env-280 | AAMC01102278.1 | + | 773   | 815   |
| env-281 | AAMC01107257.1 | + | 29850 | 29892 |
| env-282 | AAMC01108544.1 | + | 5844  | 5886  |
| env-283 | AAMC01116727.1 | - | 790   | 748   |
| env-284 | AAMC01120548.1 | - | 9268  | 9226  |
| env-285 | AAMC01067352.1 | - | 2344  | 2302  |
| env-286 | AAMC01065209.1 | + | 11868 | 11910 |
| env-287 | AAMC01063731.1 | - | 1613  | 1571  |
| env-288 | AAMC01140410.1 | - | 3550  | 3508  |
| env-289 | AAMC01020468.1 | - | 14170 | 14128 |
| env-290 | AAMC01031700.1 | + | 11821 | 11863 |
| env-291 | AAMC01038390.1 | + | 21    | 63    |
| env-292 | AAMC01002174.1 | - | 34780 | 34738 |
| env-293 | AAMC01070560.1 | + | 2283  | 2325  |
| env-294 | AAMC01094973.1 | + | 8400  | 8442  |
| env-295 | AAMC01001705.1 | + | 2052  | 2094  |
| env-296 | AAMC01004122.1 | - | 35972 | 35931 |
| env-297 | AAMC01004122.1 | - | 35707 | 35666 |
| env-298 | AAMC01004122.1 | - | 35440 | 35399 |
| env-299 | AAMC01006134.1 | - | 7480  | 7439  |
| env-300 | AAMC01009496.1 | - | 14913 | 14872 |
| env-301 | AAMC01011506.1 | + | 124   | 165   |
| env-302 | AAMC01014096.1 | + | 4814  | 4855  |
| env-303 | AAMC01014243.1 | + | 5799  | 5840  |
| env-304 | AAMC01014385.1 | - | 7251  | 7210  |
| env-305 | AAMC01015271.1 | + | 25034 | 25075 |
| env-306 | AAMC01019616.1 | - | 13331 | 13290 |
| env-307 | AAMC01025241.1 | + | 5246  | 5287  |
| env-308 | AAMC01028790.1 | - | 6481  | 6440  |
| env-309 | AAMC01028790.1 | - | 6214  | 6173  |
| env-310 | AAMC01030759.1 | + | 57253 | 57294 |
| env-311 | AAMC01031700.1 | + | 11553 | 11594 |
| env-312 | AAMC01032105.1 | - | 16576 | 16535 |
| env-313 | AAMC01038387.1 | + | 13099 | 13140 |
| env-314 | AAMC01041655.1 | - | 37586 | 37545 |
| env-315 | AAMC01048024.1 | + | 1637  | 1678  |
| env-316 | AAMC01053673.1 | + | 26607 | 26648 |
| env-317 | AAMC01062835.1 | - | 875   | 834   |
| env-318 | AAMC01064490.1 | - | 1452  | 1411  |
| env-319 | AAMC01064491.1 | - | 797   | 756   |
| env-320 | AAMC01069175.1 | + | 3066  | 3107  |
| env-321 | AAMC01070487.1 | + | 19414 | 19455 |
| env-322 | AAMC01072731.1 | + | 9582  | 9623  |
| env-323 | AAMC01084365.1 | + | 1426  | 1467  |
| env-324 | AAMC01088337.1 | + | 12491 | 12532 |
| env-325 | AAMC01089502.1 | - | 23068 | 23027 |
| env-326 | AAMC01090536.1 | - | 979   | 938   |
| env-327 | AAMC01096429.1 | + | 11474 | 11515 |
| env-328 | AAMC01100125.1 | + | 9860  | 9901  |
| env-329 | AAMC01105184.1 | - | 2336  | 2295  |
| env-330 | AAMC01107440.1 | + | 8057  | 8098  |



|         |                |   |       |       |
|---------|----------------|---|-------|-------|
| env-331 | AAMC01112245.1 | + | 8340  | 8381  |
| env-332 | AAMC01117070.1 | + | 550   | 591   |
| env-333 | AAMC01122825.1 | + | 17578 | 17619 |
| env-334 | AAMC01123017.1 | - | 30135 | 30094 |
| env-335 | AAMC01004122.1 | - | 35973 | 35931 |
| env-336 | AAMC01004122.1 | - | 35708 | 35666 |
| env-337 | AAMC01004122.1 | - | 35441 | 35399 |
| env-338 | AAMC01006134.1 | - | 7481  | 7439  |
| env-339 | AAMC01009496.1 | - | 14914 | 14872 |
| env-340 | AAMC01011506.1 | + | 123   | 165   |
| env-341 | AAMC01014096.1 | + | 4813  | 4855  |
| env-342 | AAMC01014243.1 | + | 5798  | 5840  |
| env-343 | AAMC01014385.1 | - | 7252  | 7210  |
| env-344 | AAMC01015271.1 | + | 25033 | 25075 |
| env-345 | AAMC01025241.1 | + | 5245  | 5287  |
| env-346 | AAMC01028790.1 | - | 6482  | 6440  |
| env-347 | AAMC01028790.1 | - | 6215  | 6173  |
| env-348 | AAMC01030759.1 | + | 57252 | 57294 |
| env-349 | AAMC01031700.1 | + | 11552 | 11594 |
| env-350 | AAMC01032105.1 | - | 16577 | 16535 |
| env-351 | AAMC01038387.1 | + | 13098 | 13140 |
| env-352 | AAMC01041655.1 | - | 37587 | 37545 |
| env-353 | AAMC01048024.1 | + | 1636  | 1678  |
| env-354 | AAMC01053673.1 | + | 26606 | 26648 |
| env-355 | AAMC01062835.1 | - | 876   | 834   |
| env-356 | AAMC01064490.1 | - | 1453  | 1411  |
| env-357 | AAMC01064491.1 | - | 798   | 756   |
| env-358 | AAMC01069175.1 | + | 3065  | 3107  |
| env-359 | AAMC01070487.1 | + | 19413 | 19455 |
| env-360 | AAMC01072731.1 | + | 9581  | 9623  |
| env-361 | AAMC01084365.1 | + | 1425  | 1467  |
| env-362 | AAMC01088337.1 | + | 12490 | 12532 |
| env-363 | AAMC01089502.1 | - | 23069 | 23027 |
| env-364 | AAMC01090536.1 | - | 980   | 938   |
| env-365 | AAMC01096429.1 | + | 11473 | 11515 |
| env-366 | AAMC01100125.1 | + | 9859  | 9901  |
| env-367 | AAMC01105184.1 | - | 2337  | 2295  |
| env-368 | AAMC01107440.1 | + | 8056  | 8098  |
| env-369 | AAMC01117070.1 | + | 549   | 591   |
| env-370 | AAMC01122825.1 | + | 17577 | 17619 |
| env-371 | AAMC01123017.1 | - | 30136 | 30094 |
| env-372 | AAMC01025566.1 | - | 33924 | 33882 |
| env-373 | AAMC01047488.1 | - | 3819  | 3777  |
| env-374 | AAMC01007693.1 | - | 6485  | 6443  |
| env-375 | AAMC01010803.1 | - | 14757 | 14715 |
| env-376 | AAMC01013474.1 | - | 1331  | 1289  |
| env-377 | AAMC01075491.1 | + | 14487 | 14529 |
| env-378 | AAMC01030270.1 | - | 2526  | 2484  |
| env-379 | AAMC01014232.1 | + | 4453  | 4495  |
| env-380 | AAMC01038925.1 | - | 86    | 44    |
| env-381 | AAMC01045827.1 | + | 1503  | 1545  |
| env-382 | AAMC01077541.1 | + | 22241 | 22283 |

|         |                |   |       |       |
|---------|----------------|---|-------|-------|
| env-383 | AAMC01084427.1 | - | 21723 | 21681 |
| env-384 | AAMC01094742.1 | - | 1612  | 1570  |
| env-385 | AAMC01098501.1 | + | 3037  | 3079  |
| env-386 | AAMC01098668.1 | - | 7745  | 7703  |
| env-387 | AAMC01120705.1 | + | 8977  | 9019  |
| env-388 | AAMC01156494.1 | - | 2510  | 2468  |
| env-389 | AAMC01032066.1 | + | 6021  | 6063  |
| env-390 | AAMC01081949.1 | - | 4494  | 4452  |
| env-391 | AAMC01138076.1 | - | 3112  | 3070  |
| env-392 | AAMC01021197.1 | - | 1032  | 990   |
| env-393 | AAMC01012341.1 | + | 34989 | 35031 |
| env-394 | AAMC01008887.1 | + | 3975  | 4017  |
| env-395 | AAMC01002923.1 | + | 43332 | 43374 |
| env-396 | AAMC01009668.1 | - | 34299 | 34257 |
| env-397 | AAMC01019920.1 | + | 46    | 88    |
| env-398 | AAMC01020468.1 | - | 13904 | 13862 |
| env-399 | AAMC01037305.1 | + | 14576 | 14618 |
| env-400 | AAMC01045899.1 | + | 22322 | 22364 |
| env-401 | AAMC01070560.1 | + | 895   | 937   |
| env-402 | AAMC01090418.1 | + | 16893 | 16935 |
| env-403 | AAMC01092742.1 | - | 3051  | 3009  |
| env-404 | AAMC01103892.1 | - | 18941 | 18899 |
| env-405 | AAMC01103988.1 | - | 6105  | 6063  |
| env-406 | AAMC01105995.1 | - | 8560  | 8518  |
| env-407 | AAMC01112864.1 | - | 17128 | 17086 |
| env-408 | AAMC01125562.1 | + | 20574 | 20616 |
| env-409 | AAMC01014207.1 | - | 31264 | 31222 |
| env-410 | AAMC01004321.1 | - | 419   | 377   |
| env-411 | AAMC01030853.1 | - | 3174  | 3132  |
| env-412 | AAMC01048300.1 | + | 10208 | 10250 |
| env-413 | AAMC01022016.1 | - | 20552 | 20510 |
| env-414 | AAMC01024065.1 | - | 932   | 890   |
| env-415 | AAMC01031366.1 | - | 2701  | 2659  |
| env-416 | AAMC01031605.1 | + | 3331  | 3373  |
| env-417 | AAMC01090887.1 | - | 47254 | 47212 |
| env-418 | AAMC01010244.1 | - | 5538  | 5496  |
| env-419 | AAMC01020620.1 | - | 4077  | 4035  |
| env-420 | AAMC01046090.1 | + | 11079 | 11121 |
| env-421 | AAMC01033666.1 | + | 7693  | 7735  |
| env-422 | AAMC01033655.1 | + | 327   | 369   |
| env-423 | AAMC01039212.1 | - | 6189  | 6147  |
| env-424 | AAMC01028322.1 | + | 6318  | 6360  |
| env-425 | AAMC01021516.1 | + | 937   | 979   |
| env-426 | AAMC01020984.1 | + | 11285 | 11327 |
| env-427 | AAMC01041857.1 | - | 4950  | 4908  |
| env-428 | AAMC01080566.1 | - | 9927  | 9885  |
| env-429 | AAMC01004621.1 | + | 10600 | 10642 |
| env-430 | AAMC01001312.1 | - | 6615  | 6573  |
| env-431 | AAMC01025231.1 | - | 9588  | 9546  |
| env-432 | AAMC01072190.1 | + | 11449 | 11491 |
| env-433 | AAMC01102330.1 | + | 3208  | 3250  |
| env-434 | AAMC01102330.1 | + | 3480  | 3522  |

|         |                |   |       |       |
|---------|----------------|---|-------|-------|
| env-435 | AAMC01105148.1 | - | 5178  | 5136  |
| env-436 | AAMC01123224.1 | + | 1084  | 1126  |
| env-437 | AAMC01173769.1 | + | 725   | 767   |
| env-438 | AAMC01002415.1 | - | 212   | 170   |
| env-439 | AAMC01003006.1 | + | 2352  | 2393  |
| env-440 | AAMC01004276.1 | - | 30588 | 30547 |
| env-441 | AAMC01006594.1 | + | 836   | 877   |
| env-442 | AAMC01006953.1 | + | 42783 | 42824 |
| env-443 | AAMC01009537.1 | + | 3664  | 3705  |
| env-444 | AAMC01010558.1 | + | 12903 | 12944 |
| env-445 | AAMC01011142.1 | + | 9517  | 9558  |
| env-446 | AAMC01014607.1 | - | 1553  | 1512  |
| env-447 | AAMC01017133.1 | + | 42194 | 42235 |
| env-448 | AAMC01018312.1 | + | 7927  | 7968  |
| env-449 | AAMC01025633.1 | - | 600   | 559   |
| env-450 | AAMC01031374.1 | - | 4171  | 4130  |
| env-451 | AAMC01033439.1 | + | 13474 | 13515 |
| env-452 | AAMC01033658.1 | + | 6393  | 6434  |
| env-453 | AAMC01034744.1 | - | 64    | 23    |
| env-454 | AAMC01038984.1 | - | 5928  | 5887  |
| env-455 | AAMC01044418.1 | + | 8101  | 8142  |
| env-456 | AAMC01047486.1 | - | 2710  | 2669  |
| env-457 | AAMC01048213.1 | - | 25295 | 25254 |
| env-458 | AAMC01048899.1 | + | 20547 | 20588 |
| env-459 | AAMC01050139.1 | - | 12424 | 12383 |
| env-460 | AAMC01050247.1 | + | 41556 | 41597 |
| env-461 | AAMC01054043.1 | + | 1120  | 1161  |
| env-462 | AAMC01058802.1 | - | 14953 | 14912 |
| env-463 | AAMC01061152.1 | + | 7010  | 7051  |
| env-464 | AAMC01061176.1 | - | 4608  | 4567  |
| env-465 | AAMC01063102.1 | + | 10900 | 10941 |
| env-466 | AAMC01063146.1 | + | 9594  | 9635  |
| env-467 | AAMC01063290.1 | - | 1317  | 1276  |
| env-468 | AAMC01063742.1 | - | 5634  | 5593  |
| env-469 | AAMC01067101.1 | + | 21330 | 21371 |
| env-470 | AAMC01069551.1 | + | 1935  | 1976  |
| env-471 | AAMC01069551.1 | + | 2480  | 2521  |
| env-472 | AAMC01069631.1 | + | 4470  | 4511  |
| env-473 | AAMC01072219.1 | + | 133   | 174   |
| env-474 | AAMC01073868.1 | - | 13845 | 13804 |
| env-475 | AAMC01077245.1 | + | 123   | 164   |
| env-476 | AAMC01077753.1 | + | 3079  | 3120  |
| env-477 | AAMC01078778.1 | - | 490   | 449   |
| env-478 | AAMC01080620.1 | - | 1170  | 1129  |
| env-479 | AAMC01081204.1 | + | 31242 | 31283 |
| env-480 | AAMC01086674.1 | + | 3188  | 3229  |
| env-481 | AAMC01087105.1 | + | 9489  | 9530  |
| env-482 | AAMC01094616.1 | - | 967   | 926   |
| env-483 | AAMC01094983.1 | - | 73580 | 73539 |
| env-484 | AAMC01096177.1 | - | 1885  | 1844  |
| env-485 | AAMC01097952.1 | - | 17609 | 17568 |
| env-486 | AAMC01099973.1 | - | 21306 | 21265 |

|         |                |   |       |       |
|---------|----------------|---|-------|-------|
| env-487 | AAMC01101467.1 | + | 323   | 364   |
| env-488 | AAMC01103205.1 | + | 6147  | 6188  |
| env-489 | AAMC01105782.1 | - | 2567  | 2526  |
| env-490 | AAMC01106794.1 | - | 14190 | 14149 |
| env-491 | AAMC01108296.1 | - | 9524  | 9483  |
| env-492 | AAMC01108600.1 | - | 27809 | 27768 |
| env-493 | AAMC01112304.1 | - | 7880  | 7839  |
| env-494 | AAMC01112304.1 | - | 7609  | 7568  |
| env-495 | AAMC01112403.1 | + | 4595  | 4636  |
| env-496 | AAMC01113153.1 | - | 15468 | 15427 |
| env-497 | AAMC01114550.1 | - | 5918  | 5877  |
| env-498 | AAMC01123480.1 | + | 15962 | 16003 |
| env-499 | AAMC01140008.1 | + | 884   | 925   |
| env-500 | AAMC01140629.1 | - | 938   | 897   |
| env-501 | AAMC01140629.1 | - | 397   | 356   |
| env-502 | AAMC01151225.1 | - | 1866  | 1825  |
| env-503 | AAMC01156494.1 | - | 2238  | 2197  |
| env-504 | AAMC01156606.1 | - | 1076  | 1035  |
| env-505 | AAMC01162244.1 | + | 789   | 830   |
| env-506 | AAMC01004276.1 | - | 30589 | 30547 |
| env-507 | AAMC01006594.1 | + | 835   | 877   |
| env-508 | AAMC01006953.1 | + | 42782 | 42824 |
| env-509 | AAMC01009537.1 | + | 3663  | 3705  |
| env-510 | AAMC01010558.1 | + | 12902 | 12944 |
| env-511 | AAMC01011142.1 | + | 9516  | 9558  |
| env-512 | AAMC01014607.1 | - | 1554  | 1512  |
| env-513 | AAMC01017133.1 | + | 42193 | 42235 |
| env-514 | AAMC01025633.1 | - | 601   | 559   |
| env-515 | AAMC01031374.1 | - | 4172  | 4130  |
| env-516 | AAMC01033439.1 | + | 13473 | 13515 |
| env-517 | AAMC01033658.1 | + | 6392  | 6434  |
| env-518 | AAMC01034744.1 | - | 65    | 23    |
| env-519 | AAMC01044418.1 | + | 8100  | 8142  |
| env-520 | AAMC01048213.1 | - | 25296 | 25254 |
| env-521 | AAMC01048899.1 | + | 20546 | 20588 |
| env-522 | AAMC01050247.1 | + | 41555 | 41597 |
| env-523 | AAMC01054043.1 | + | 1119  | 1161  |
| env-524 | AAMC01058802.1 | - | 14954 | 14912 |
| env-525 | AAMC01061152.1 | + | 7009  | 7051  |
| env-526 | AAMC01061176.1 | - | 4609  | 4567  |
| env-527 | AAMC01063102.1 | + | 10899 | 10941 |
| env-528 | AAMC01063146.1 | + | 9593  | 9635  |
| env-529 | AAMC01063290.1 | - | 1318  | 1276  |
| env-530 | AAMC01063742.1 | - | 5635  | 5593  |
| env-531 | AAMC01067101.1 | + | 21329 | 21371 |
| env-532 | AAMC01069551.1 | + | 1934  | 1976  |
| env-533 | AAMC01069551.1 | + | 2479  | 2521  |
| env-534 | AAMC01069631.1 | + | 4469  | 4511  |
| env-535 | AAMC01073868.1 | - | 13846 | 13804 |
| env-536 | AAMC01077245.1 | + | 122   | 164   |
| env-537 | AAMC01077753.1 | + | 3078  | 3120  |
| env-538 | AAMC01078778.1 | - | 491   | 449   |

|         |                |   |       |       |
|---------|----------------|---|-------|-------|
| env-539 | AAMC01080620.1 | - | 1171  | 1129  |
| env-540 | AAMC01081204.1 | + | 31241 | 31283 |
| env-541 | AAMC01086674.1 | + | 3187  | 3229  |
| env-542 | AAMC01087105.1 | + | 9488  | 9530  |
| env-543 | AAMC01094616.1 | - | 968   | 926   |
| env-544 | AAMC01094983.1 | - | 73581 | 73539 |
| env-545 | AAMC01097952.1 | - | 17610 | 17568 |
| env-546 | AAMC01099973.1 | - | 21307 | 21265 |
| env-547 | AAMC01101467.1 | + | 322   | 364   |
| env-548 | AAMC01103205.1 | + | 6146  | 6188  |
| env-549 | AAMC01105782.1 | - | 2568  | 2526  |
| env-550 | AAMC01106794.1 | - | 14191 | 14149 |
| env-551 | AAMC01108600.1 | - | 27810 | 27768 |
| env-552 | AAMC01112304.1 | - | 7881  | 7839  |
| env-553 | AAMC01112304.1 | - | 7610  | 7568  |
| env-554 | AAMC01112403.1 | + | 4594  | 4636  |
| env-555 | AAMC01113153.1 | - | 15469 | 15427 |
| env-556 | AAMC01114550.1 | - | 5919  | 5877  |
| env-557 | AAMC01123480.1 | + | 15961 | 16003 |
| env-558 | AAMC01140008.1 | + | 883   | 925   |
| env-559 | AAMC01140629.1 | - | 939   | 897   |
| env-560 | AAMC01140629.1 | - | 398   | 356   |
| env-561 | AAMC01151225.1 | - | 1867  | 1825  |
| env-562 | AAMC01156494.1 | - | 2239  | 2197  |
| env-563 | AAMC01156606.1 | - | 1077  | 1035  |
| env-564 | AAMC01162244.1 | + | 788   | 830   |
| env-565 | AAMC01011176.1 | - | 1900  | 1858  |
| env-566 | AAMC01033554.1 | - | 1395  | 1353  |
| env-567 | AAMC01048213.1 | - | 25568 | 25526 |
| env-568 | AAMC01020983.1 | - | 2832  | 2790  |
| env-569 | AAMC01026511.1 | + | 27    | 69    |
| env-570 | AAMC01077245.1 | + | 396   | 438   |
| env-571 | AAMC01106794.1 | - | 13919 | 13877 |
| env-572 | AAMC01106794.1 | - | 13648 | 13606 |
| env-573 | AAMC01104154.1 | - | 1733  | 1691  |
| env-574 | AAMC01089528.1 | + | 4599  | 4641  |
| env-575 | AAMC01084520.1 | - | 7797  | 7755  |
| env-576 | AAMC01121068.1 | - | 3032  | 2990  |
| env-577 | AAMC01006818.1 | - | 6147  | 6105  |
| env-578 | AAMC01006850.1 | - | 7375  | 7333  |
| env-579 | AAMC01071329.1 | + | 10214 | 10256 |
| env-580 | AAMC01117341.1 | + | 8662  | 8704  |
| env-581 | AAMC01041699.1 | - | 5236  | 5194  |
| env-582 | AAMC01071329.1 | + | 9948  | 9990  |
| env-583 | AAMC01084359.1 | + | 8416  | 8458  |
| env-584 | AAMC01074853.1 | + | 8426  | 8468  |
| env-585 | AAMC01129964.1 | + | 853   | 895   |
| env-586 | AAMC01148345.1 | + | 19    | 61    |
| env-587 | AAMC01154488.1 | - | 181   | 139   |
| env-588 | AAMC01082585.1 | - | 22638 | 22596 |
| env-589 | AAMC01072578.1 | - | 368   | 326   |
| env-590 | AAMC01107440.1 | - | 5666  | 5624  |

|         |                |   |       |       |
|---------|----------------|---|-------|-------|
| env-591 | AAMC01040219.1 | + | 5012  | 5054  |
| env-592 | AAMC01046892.1 | - | 4761  | 4719  |
| env-593 | AAMC01051430.1 | - | 12234 | 12192 |
| env-594 | AAMC01046318.1 | + | 3221  | 3263  |
| env-595 | AAMC01120548.1 | - | 8989  | 8947  |
| env-596 | AAMC01048956.1 | - | 4241  | 4199  |
| env-597 | AAMC01051203.1 | - | 469   | 427   |
| env-598 | AAMC01047095.1 | - | 53247 | 53205 |
| env-599 | AAMC01039510.1 | + | 1876  | 1918  |
| env-600 | AAMC01052866.1 | + | 7448  | 7490  |
| env-601 | AAMC01127475.1 | + | 177   | 219   |
| env-602 | AAMC01041938.1 | - | 1256  | 1214  |
| env-603 | AAMC01073187.1 | + | 145   | 187   |
| env-604 | AAMC01075589.1 | - | 19233 | 19191 |
| env-605 | AAMC01005245.1 | + | 11703 | 11744 |
| env-606 | AAMC01048956.1 | - | 4547  | 4505  |
| env-607 | AAMC01012830.1 | + | 34775 | 34817 |
| env-608 | AAMC01046682.1 | - | 71259 | 71217 |
| env-609 | AAMC01032896.1 | - | 54572 | 54530 |
| env-610 | AAMC01011366.1 | - | 72    | 30    |
| env-611 | AAMC01011373.1 | - | 856   | 814   |
| env-612 | AAMC01011373.1 | - | 564   | 522   |
| env-613 | AAMC01081668.1 | - | 15703 | 15661 |
| env-614 | AAMC01057290.1 | - | 2414  | 2372  |
| env-615 | AAMC01010632.1 | + | 59    | 101   |
| env-616 | AAMC01005766.1 | - | 14223 | 14181 |
| env-617 | AAMC01003482.1 | - | 13241 | 13199 |
| env-618 | AAMC01000996.1 | - | 41725 | 41683 |
| env-619 | AAMC01053630.1 | - | 2998  | 2956  |
| env-620 | AAMC01129733.1 | + | 3804  | 3846  |
| env-621 | AAMC01046152.1 | + | 5515  | 5557  |
| env-622 | AAMC01000603.1 | + | 10426 | 10468 |
| env-623 | AAMC01000745.1 | + | 12483 | 12525 |
| env-624 | AAMC01000932.1 | - | 13399 | 13357 |
| env-625 | AAMC01001216.1 | - | 22840 | 22798 |
| env-626 | AAMC01003030.1 | - | 3741  | 3699  |
| env-627 | AAMC01003125.1 | - | 37532 | 37490 |
| env-628 | AAMC01003711.1 | + | 3667  | 3709  |
| env-629 | AAMC01004150.1 | + | 530   | 572   |
| env-630 | AAMC01004151.1 | + | 4065  | 4107  |
| env-631 | AAMC01006071.1 | - | 15800 | 15758 |
| env-632 | AAMC01006345.1 | + | 23845 | 23887 |
| env-633 | AAMC01006905.1 | - | 1007  | 965   |
| env-634 | AAMC01006905.1 | - | 830   | 788   |
| env-635 | AAMC01006925.1 | - | 14040 | 13998 |
| env-636 | AAMC01006953.1 | + | 31901 | 31943 |
| env-637 | AAMC01006976.1 | + | 3458  | 3500  |
| env-638 | AAMC01006986.1 | - | 46534 | 46492 |
| env-639 | AAMC01008473.1 | - | 12542 | 12500 |
| env-640 | AAMC01009030.1 | + | 15904 | 15946 |
| env-641 | AAMC01009471.1 | - | 2433  | 2391  |
| env-642 | AAMC01009537.1 | - | 3444  | 3402  |

|         |                |   |       |       |
|---------|----------------|---|-------|-------|
| env-643 | AAMC01014236.1 | + | 854   | 896   |
| env-644 | AAMC01014244.1 | + | 8233  | 8275  |
| env-645 | AAMC01017484.1 | + | 16564 | 16606 |
| env-646 | AAMC01019058.1 | + | 16815 | 16857 |
| env-647 | AAMC01023669.1 | - | 33354 | 33312 |
| env-648 | AAMC01024288.1 | + | 13732 | 13774 |
| env-649 | AAMC01026549.1 | + | 16786 | 16828 |
| env-650 | AAMC01029029.1 | - | 578   | 536   |
| env-651 | AAMC01029382.1 | + | 14998 | 15040 |
| env-652 | AAMC01030585.1 | + | 110   | 152   |
| env-653 | AAMC01031520.1 | + | 4322  | 4364  |
| env-654 | AAMC01033430.1 | - | 211   | 169   |
| env-655 | AAMC01034136.1 | - | 16793 | 16751 |
| env-656 | AAMC01035993.1 | - | 16604 | 16562 |
| env-657 | AAMC01036080.1 | + | 7427  | 7469  |
| env-658 | AAMC01039721.1 | - | 225   | 183   |
| env-659 | AAMC01040391.1 | - | 2915  | 2873  |
| env-660 | AAMC01041126.1 | - | 22016 | 21974 |
| env-661 | AAMC01041132.1 | - | 4784  | 4742  |
| env-662 | AAMC01042344.1 | - | 2580  | 2538  |
| env-663 | AAMC01042648.1 | + | 8805  | 8847  |
| env-664 | AAMC01042882.1 | - | 8795  | 8753  |
| env-665 | AAMC01043548.1 | + | 3995  | 4037  |
| env-666 | AAMC01044407.1 | - | 12412 | 12370 |
| env-667 | AAMC01044586.1 | + | 77    | 119   |
| env-668 | AAMC01044598.1 | - | 15993 | 15951 |
| env-669 | AAMC01045082.1 | - | 41847 | 41805 |
| env-670 | AAMC01045823.1 | + | 3108  | 3150  |
| env-671 | AAMC01046861.1 | + | 6320  | 6362  |
| env-672 | AAMC01046861.1 | + | 6592  | 6634  |
| env-673 | AAMC01046861.1 | + | 6864  | 6906  |
| env-674 | AAMC01048947.1 | - | 23509 | 23467 |
| env-675 | AAMC01049999.1 | + | 14262 | 14304 |
| env-676 | AAMC01050517.1 | + | 19183 | 19225 |
| env-677 | AAMC01050917.1 | + | 21416 | 21458 |
| env-678 | AAMC01052061.1 | + | 42881 | 42923 |
| env-679 | AAMC01053358.1 | + | 107   | 149   |
| env-680 | AAMC01053947.1 | - | 15883 | 15841 |
| env-681 | AAMC01055991.1 | - | 1443  | 1401  |
| env-682 | AAMC01056080.1 | - | 3174  | 3132  |
| env-683 | AAMC01056761.1 | + | 4227  | 4269  |
| env-684 | AAMC01060021.1 | + | 2181  | 2223  |
| env-685 | AAMC01060021.1 | - | 10311 | 10269 |
| env-686 | AAMC01064828.1 | + | 11218 | 11260 |
| env-687 | AAMC01064830.1 | - | 6723  | 6681  |
| env-688 | AAMC01065876.1 | - | 5582  | 5540  |
| env-689 | AAMC01066582.1 | + | 77    | 119   |
| env-690 | AAMC01069790.1 | - | 45396 | 45354 |
| env-691 | AAMC01070594.1 | - | 14584 | 14542 |
| env-692 | AAMC01071081.1 | - | 25715 | 25673 |
| env-693 | AAMC01071134.1 | - | 24599 | 24557 |
| env-694 | AAMC01071170.1 | - | 17411 | 17369 |

|         |                |   |       |       |
|---------|----------------|---|-------|-------|
| env-695 | AAMC01071356.1 | - | 52780 | 52738 |
| env-696 | AAMC01073143.1 | + | 58986 | 59028 |
| env-697 | AAMC01073851.1 | + | 16445 | 16487 |
| env-698 | AAMC01074079.1 | + | 28305 | 28347 |
| env-699 | AAMC01074163.1 | + | 7179  | 7221  |
| env-700 | AAMC01075174.1 | - | 3170  | 3128  |
| env-701 | AAMC01076291.1 | + | 7895  | 7937  |
| env-702 | AAMC01076565.1 | + | 963   | 1005  |
| env-703 | AAMC01080955.1 | - | 1604  | 1562  |
| env-704 | AAMC01082242.1 | + | 6215  | 6257  |
| env-705 | AAMC01084388.1 | + | 6405  | 6447  |
| env-706 | AAMC01084520.1 | + | 8504  | 8546  |
| env-707 | AAMC01085087.1 | + | 10250 | 10292 |
| env-708 | AAMC01086741.1 | - | 6364  | 6322  |
| env-709 | AAMC01087379.1 | - | 896   | 854   |
| env-710 | AAMC01087627.1 | - | 6216  | 6174  |
| env-711 | AAMC01089516.1 | - | 2589  | 2547  |
| env-712 | AAMC01089696.1 | - | 39534 | 39492 |
| env-713 | AAMC01089706.1 | - | 192   | 150   |
| env-714 | AAMC01090128.1 | + | 10484 | 10526 |
| env-715 | AAMC01090636.1 | - | 662   | 620   |
| env-716 | AAMC01091331.1 | - | 4493  | 4451  |
| env-717 | AAMC01097813.1 | - | 19091 | 19049 |
| env-718 | AAMC01100467.1 | + | 5023  | 5065  |
| env-719 | AAMC01101417.1 | + | 919   | 961   |
| env-720 | AAMC01102238.1 | + | 1736  | 1778  |
| env-721 | AAMC01102384.1 | - | 4806  | 4764  |
| env-722 | AAMC01103604.1 | + | 11810 | 11852 |
| env-723 | AAMC01103773.1 | - | 950   | 908   |
| env-724 | AAMC01105762.1 | - | 43194 | 43152 |
| env-725 | AAMC01109241.1 | + | 9249  | 9291  |
| env-726 | AAMC01110916.1 | - | 2200  | 2158  |
| env-727 | AAMC01112256.1 | - | 13832 | 13790 |
| env-728 | AAMC01117266.1 | + | 12847 | 12889 |
| env-729 | AAMC01123502.1 | + | 8809  | 8851  |
| env-730 | AAMC01129400.1 | + | 7256  | 7298  |
| env-731 | AAMC01145236.1 | + | 103   | 145   |
| env-732 | AAMC01145696.1 | + | 418   | 460   |
| env-733 | AAMC01146018.1 | + | 554   | 596   |
| env-734 | AAMC01150666.1 | + | 682   | 724   |
| env-735 | AAMC01150991.1 | + | 3842  | 3884  |
| env-736 | AAMC01156592.1 | - | 2261  | 2219  |
| env-737 | AAMC01156969.1 | + | 1219  | 1261  |
| env-738 | AAMC01164257.1 | - | 746   | 704   |
| env-739 | AAMC01172369.1 | + | 672   | 714   |
| env-740 | AAMC01176648.1 | - | 234   | 192   |
| env-741 | AAMC01184383.1 | - | 378   | 336   |
| env-742 | AAMC01026906.1 | - | 33194 | 33153 |
| env-743 | AAMC01004150.1 | + | 639   | 681   |
| env-744 | AAMC01066542.1 | - | 706   | 664   |
| env-745 | AAMC01127300.1 | + | 76    | 118   |
| env-746 | AAMC01046932.1 | + | 3383  | 3422  |



|         |                |   |       |       |
|---------|----------------|---|-------|-------|
| env-747 | AAMC01012412.1 | + | 15081 | 15123 |
| env-748 | AAMC01018426.1 | - | 13757 | 13715 |
| env-749 | AAMC01022708.1 | - | 14475 | 14433 |
| env-750 | AAMC01028208.1 | + | 7208  | 7250  |
| env-751 | AAMC01037788.1 | + | 4602  | 4644  |
| env-752 | AAMC01057456.1 | + | 1047  | 1089  |
| env-753 | AAMC01084911.1 | + | 27241 | 27283 |
| env-754 | AAMC01099287.1 | + | 37    | 79    |
| env-755 | AAMC01100540.1 | + | 1158  | 1200  |
| env-756 | AAMC01103103.1 | + | 4328  | 4370  |
| env-757 | AAMC01106477.1 | + | 56    | 98    |
| env-758 | AAMC01138065.1 | + | 23466 | 23508 |
| env-759 | AAMC01177187.1 | + | 943   | 985   |
| env-760 | AAMC01182636.1 | - | 560   | 518   |
| env-761 | AAMC01039176.1 | + | 9663  | 9704  |
| env-762 | AAMC01000242.1 | + | 22809 | 22851 |
| env-763 | AAMC01082008.1 | + | 102   | 144   |
| env-764 | AAMC01000319.1 | - | 1274  | 1232  |
| env-765 | AAMC01002253.1 | - | 956   | 914   |
| env-766 | AAMC01036698.1 | + | 518   | 560   |
| env-767 | AAMC01040134.1 | - | 6770  | 6728  |
| env-768 | AAMC01041699.1 | + | 5443  | 5485  |
| env-769 | AAMC01044449.1 | + | 1896  | 1938  |
| env-770 | AAMC01057482.1 | + | 21124 | 21166 |
| env-771 | AAMC01061979.1 | - | 4276  | 4234  |
| env-772 | AAMC01077532.1 | - | 5961  | 5919  |
| env-773 | AAMC01084359.1 | + | 8150  | 8192  |
| env-774 | AAMC01094935.1 | + | 23050 | 23092 |
| env-775 | AAMC01096810.1 | + | 6335  | 6377  |
| env-776 | AAMC01096810.1 | + | 6602  | 6644  |
| env-777 | AAMC01103780.1 | - | 8382  | 8340  |
| env-778 | AAMC01112804.1 | - | 24411 | 24369 |
| env-779 | AAMC01123426.1 | + | 748   | 790   |
| env-780 | AAMC01152085.1 | - | 1531  | 1489  |
| env-781 | AAMC01007333.1 | - | 1623  | 1581  |
| env-782 | AAMC01007353.1 | - | 740   | 698   |
| env-783 | AAMC01045280.1 | + | 1785  | 1827  |
| env-784 | AAMC01052699.1 | - | 1018  | 976   |
| env-785 | AAMC01052700.1 | - | 5489  | 5447  |
| env-786 | AAMC01097875.1 | + | 12675 | 12717 |
| env-787 | AAMC01187267.1 | + | 284   | 326   |
| env-788 | AAMC01009351.1 | - | 6944  | 6902  |
| env-789 | AAMC01079003.1 | - | 19909 | 19867 |
| env-790 | AAMC01004883.1 | - | 2691  | 2649  |
| env-791 | AAMC01003496.1 | - | 2222  | 2180  |
| env-792 | AAMC01048513.1 | - | 49433 | 49391 |
| env-793 | AAMC01080860.1 | + | 8546  | 8588  |
| env-794 | AAMC01153362.1 | + | 1359  | 1401  |
| env-795 | AAMC01012190.1 | - | 3532  | 3490  |
| env-796 | AAMC01015913.1 | - | 4548  | 4506  |
| env-797 | AAMC01017834.1 | - | 9974  | 9932  |
| env-798 | AAMC01048612.1 | - | 3933  | 3891  |

|         |                             |   |       |       |
|---------|-----------------------------|---|-------|-------|
| env-799 | AAMC01064596.1              | - | 5489  | 5447  |
| env-800 | AAMC01071319.1              | + | 9451  | 9493  |
| env-801 | AAMC01171713.1              | + | 399   | 441   |
| env-802 | AAMC01051899.1              | - | 10617 | 10575 |
| env-803 | AAMC01011179.1              | - | 13665 | 13623 |
| env-804 | AAMC01031773.1              | - | 34407 | 34365 |
| env-805 | AAMC01007197.1              | - | 21238 | 21196 |
| env-806 | AAMC01004450.1              | - | 17747 | 17705 |
| env-807 | AAMC01001575.1              | - | 30181 | 30140 |
| env-808 | AAMC01026209.1              | - | 10806 | 10765 |
| env-809 | AAMC01061592.1              | - | 21840 | 21799 |
| env-810 | AAMC01105695.1              | - | 12259 | 12218 |
| env-811 | AAMC01121475.1              | - | 30323 | 30282 |
| env-812 | AAMC01118697.1              | + | 8575  | 8617  |
| env-813 | AAMC01000539.1              | - | 17955 | 17913 |
| env-814 | AAMC01003674.1              | + | 1229  | 1271  |
| env-815 | AAMC01040193.1              | + | 167   | 209   |
| env-816 | AAMC01041132.1              | + | 4911  | 4953  |
| env-817 | AAMC01099631.1              | + | 6626  | 6668  |
| env-818 | AAMC01109278.1              | + | 4092  | 4134  |
| env-819 | AAMC01003675.1              | + | 500   | 542   |
| env-820 | AAMC01075689.1              | - | 10756 | 10714 |
| env-821 | AAMC01181311.1              | - | 300   | 258   |
| env-822 | AAMC01003030.1              | + | 3869  | 3911  |
| env-823 | AAMC01017159.1              | + | 19941 | 19983 |
| env-824 | AAMC01018408.1              | + | 1022  | 1064  |
| env-825 | AAMC01035438.1              | + | 8     | 50    |
| env-826 | AAMC01048300.1              | - | 9980  | 9938  |
| env-827 | AAMC01058697.1              | + | 22132 | 22174 |
| env-828 | AAMC01089696.1              | + | 39720 | 39762 |
| env-829 | AAMC01102331.1              | + | 12974 | 13016 |
| env-830 | AAMC01102498.1              | - | 10260 | 10218 |
| env-831 | AAMC01000995.1              | - | 2165  | 2123  |
| env-832 | AAMC01014704.1              | + | 9566  | 9608  |
| env-833 | AAMC01165257.1              | - | 361   | 319   |
| env-834 | AAMC01014629.1              | - | 8110  | 8068  |
| env-835 | AAMC01168955.1              | + | 1777  | 1819  |
| env-836 | AAMC01063742.1              | - | 20708 | 20666 |
| env-837 | AAMC01102193.1              | + | 8486  | 8528  |
| env-838 | AAMC01104100.1              | - | 23203 | 23161 |
| env-839 | JCVLSCAF_1096627096558      | + | 3354  | 3410  |
| env-840 | JCVLSCAF_1096627928087      | - | 1276  | 1223  |
| env-841 | NCBLBBAY_READ_1106105089367 | + | 998   | 1055  |
| env-842 | JCVLSCAF_1101668011206      | + | 75    | 128   |
| env-843 | JCVLSCAF_1096627709283      | + | 1294  | 1347  |
| env-844 | JCVLSCAF_1096628035178      | + | 1112  | 1165  |
| env-845 | JCVLSCAF_1101668029935      | - | 1075  | 1022  |
| env-846 | JCVLSCAF_1101668395648      | - | 202   | 149   |
| env-847 | JCVLSCAF_1101668047413      | - | 1345  | 1288  |
| env-848 | JCVLSCAF_1101668047413      | - | 567   | 514   |
| env-849 | JCVLSCAF_1096627431775      | - | 186   | 131   |
| env-850 | JCVLSCAF_1096627033904      | - | 268   | 209   |





















































































































































































































































































































































































































































































































































































































































































































































































































































|                     |                                                                                                                                                                                                   |
|---------------------|---------------------------------------------------------------------------------------------------------------------------------------------------------------------------------------------------|
| Dbo-2-1 to Dbo-2-2  | Eukaryota Metazoa Arthropoda Hexapoda Insecta Pterygota Neoptera Orthopteroidea Orthoptera Ensifera Tettigonioidea Rhaphidophoridae Dolichopodainae Dolichopodaini <i>Dolichopoda bormansi</i>    |
| Dca-1-1 to Dca-1-3  | Eukaryota Metazoa Arthropoda Hexapoda Insecta Pterygota Neoptera Orthopteroidea Orthoptera Ensifera Tettigonioidea Rhaphidophoridae Dolichopodainae Dolichopodaini <i>Dolichopoda capreensis</i>  |
| Dge-1-1 to Dge-1-47 | Eukaryota Metazoa Arthropoda Hexapoda Insecta Pterygota Neoptera Orthopteroidea Orthoptera Ensifera Tettigonioidea Rhaphidophoridae Dolichopodainae Dolichopodaini <i>Dolichopoda geniculata</i>  |
| Dla-1-1 to Dla-1-12 | Eukaryota Metazoa Arthropoda Hexapoda Insecta Pterygota Neoptera Orthopteroidea Orthoptera Ensifera Tettigonioidea Rhaphidophoridae Dolichopodainae Dolichopodaini <i>Dolichopoda laetitiae</i>   |
| Dli-1-1 to Dli-1-17 | Eukaryota Metazoa Arthropoda Hexapoda Insecta Pterygota Neoptera Orthopteroidea Orthoptera Ensifera Tettigonioidea Rhaphidophoridae Dolichopodainae Dolichopodaini <i>Dolichopoda ligustica</i>   |
| Dli-2-1 to Dli-2-22 | Eukaryota Metazoa Arthropoda Hexapoda Insecta Pterygota Neoptera Orthopteroidea Orthoptera Ensifera Tettigonioidea Rhaphidophoridae Dolichopodainae Dolichopodaini <i>Dolichopoda linderi</i>     |
| Dpa-1-1 to Dpa-1-4  | Eukaryota Metazoa Arthropoda Hexapoda Insecta Pterygota Neoptera Orthopteroidea Orthoptera Ensifera Tettigonioidea Rhaphidophoridae Dolichopodainae Dolichopodaini <i>Dolichopoda palpata</i>     |
| Dsc-1-1 to Dsc-1-62 | Eukaryota Metazoa Arthropoda Hexapoda Insecta Pterygota Neoptera Orthopteroidea Orthoptera Ensifera Tettigonioidea Rhaphidophoridae Dolichopodainae Dolichopodaini <i>Dolichopoda schiavazzii</i> |

## 2.2 Nucleotide coordinates

Each type I hammerhead ribozyme (indicated by “RNA→”) is listed. The accession number of the sequence containing each type I hammerhead ribozyme is given. Accessions beginning with “NC\_” or “NZ\_” are RefSeq, while other accession refer to environmental samples. Nucleotide coordinates are given for the 5′ and 3′ boundaries

of each. If the 5′ coordinate is greater than the 3′ coordinate, the RNA is present on the reverse-complement strand of the containing genomic DNA sequence. Each hit is denoted by an abbreviation (like “Eco-1-1”) that refers to a taxonomy given in Section 2.1.

| abbrev. | Seq. accession |   | 5′ at | 3′ at |
|---------|----------------|---|-------|-------|
| Dae-1-1 | GU322181.1     | + | 313   | 379   |
| Dge-1-1 | GU322150.1     | + | 312   | 377   |
| Dae-1-2 | GU322187.1     | + | 310   | 374   |
| Dli-2-1 | GU322309.1     | + | 311   | 376   |
| Dpa-1-1 | GU322312.1     | + | 309   | 374   |
| Dba-1-1 | GU322293.1     | + | 313   | 378   |
| Dli-2-2 | GU322335.1     | + | 313   | 378   |
| Dli-2-3 | GU322162.1     | + | 313   | 379   |
| Dsc-1-1 | GU322192.1     | + | 313   | 378   |
| Dli-2-4 | GU322217.1     | + | 310   | 375   |
| Dli-2-5 | GU322216.1     | + | 312   | 377   |
| Dli-2-6 | GU322215.1     | + | 311   | 376   |
| Dge-1-2 | GU322340.1     | + | 320   | 385   |
| Dge-1-3 | GU322271.1     | + | 320   | 385   |
| Dge-1-4 | GU322270.1     | + | 320   | 385   |
| Dsc-1-2 | GU322145.1     | + | 313   | 378   |
| Dsc-1-3 | Z69693.1       | + | 333   | 398   |
| Dsc-1-4 | GU322190.1     | + | 314   | 379   |
| Dbo-2-1 | GU322172.1     | + | 294   | 359   |
| Dbo-2-2 | GU322173.1     | + | 299   | 364   |
| Dli-1-1 | GU322201.1     | + | 310   | 375   |



|          |            |   |     |     |
|----------|------------|---|-----|-----|
| Dba-1-2  | GU322294.1 | + | 314 | 379 |
| Dge-1-5  | GU322152.1 | + | 310 | 375 |
| Dge-1-6  | GU322149.1 | + | 313 | 378 |
| Dsc-1-5  | GU322328.1 | + | 312 | 377 |
| Dsc-1-6  | Z69687.1   | + | 332 | 397 |
| Dsc-1-7  | Z69686.1   | + | 332 | 397 |
| Dsc-1-8  | GU322146.1 | + | 312 | 377 |
| Dsc-1-9  | Z69694.1   | + | 332 | 397 |
| Dsc-1-10 | GU322260.1 | + | 311 | 376 |
| Dsc-1-11 | GU322249.1 | + | 312 | 377 |
| Dsc-1-12 | GU322251.1 | + | 312 | 377 |
| Dsc-1-13 | GU322327.1 | + | 312 | 377 |
| Dsc-1-14 | GU322280.1 | + | 311 | 376 |
| Dsc-1-15 | GU322157.1 | + | 311 | 376 |
| Dsc-1-16 | Z69700.1   | + | 331 | 396 |
| Dsc-1-17 | GU322155.1 | + | 311 | 376 |
| Dsc-1-18 | Z69699.1   | + | 331 | 396 |
| Dsc-1-19 | GU322330.1 | + | 312 | 377 |
| Dsc-1-20 | GU322283.1 | + | 312 | 377 |
| Dsc-1-21 | GU322282.1 | + | 313 | 378 |
| Dsc-1-22 | GU322281.1 | + | 307 | 372 |
| Dsc-1-23 | GU322279.1 | + | 313 | 378 |
| Dsc-1-24 | GU322278.1 | + | 312 | 377 |
| Dsc-1-25 | GU322252.1 | + | 312 | 377 |
| Dsc-1-26 | GU322250.1 | + | 312 | 377 |
| Dsc-1-27 | GU322248.1 | + | 313 | 378 |
| Dsc-1-28 | GU322230.1 | + | 311 | 376 |
| Dsc-1-29 | GU322229.1 | + | 312 | 377 |
| Dsc-1-30 | GU322227.1 | + | 313 | 378 |
| Dsc-1-31 | GU322226.1 | + | 312 | 377 |
| Dsc-1-32 | GU322225.1 | + | 312 | 377 |
| Dsc-1-33 | GU322191.1 | + | 313 | 378 |
| Dsc-1-34 | GU322189.1 | + | 313 | 378 |
| Dsc-1-35 | GU322188.1 | + | 312 | 377 |
| Dsc-1-36 | GU322178.1 | + | 316 | 381 |
| Dsc-1-37 | GU322176.1 | + | 316 | 381 |
| Dsc-1-38 | GU322174.1 | + | 316 | 381 |
| Dsc-1-39 | GU322160.1 | + | 313 | 378 |
| Dsc-1-40 | GU322159.1 | + | 311 | 376 |
| Dsc-1-41 | GU322156.1 | + | 311 | 376 |
| Dsc-1-42 | GU322148.1 | + | 311 | 376 |
| Dsc-1-43 | GU322147.1 | + | 315 | 380 |
| Dsc-1-44 | GU322144.1 | + | 313 | 378 |
| Dsc-1-45 | GU322143.1 | + | 312 | 377 |
| Dsc-1-46 | Z69690.1   | + | 332 | 397 |
| Dsc-1-47 | Z69685.1   | + | 332 | 397 |
| Dsc-1-48 | Z69696.1   | + | 331 | 396 |
| Dsc-1-49 | Z69695.1   | + | 335 | 400 |
| Dsc-1-50 | Z69692.1   | + | 333 | 398 |
| Dsc-1-51 | Z69691.1   | + | 332 | 397 |
| Dsc-1-52 | Z69703.1   | + | 333 | 398 |
| Dsc-1-53 | Z69702.1   | + | 331 | 396 |

|          |            |   |     |     |
|----------|------------|---|-----|-----|
| Dsc-1-54 | Z69698.1   | + | 331 | 396 |
| Dsc-1-55 | GU322258.1 | + | 312 | 376 |
| Dsc-1-56 | GU322154.1 | + | 311 | 376 |
| Dsc-1-57 | Z69704.1   | + | 331 | 396 |
| Dsc-1-58 | Z69697.1   | + | 331 | 396 |
| Dsc-1-59 | GU322175.1 | + | 312 | 377 |
| Dli-1-2  | GU322202.1 | + | 312 | 377 |
| Dla-1-1  | GU322220.1 | + | 313 | 377 |
| Dli-2-7  | GU322331.1 | + | 313 | 377 |
| Dli-2-8  | GU322334.1 | + | 312 | 375 |
| Dli-2-9  | GU322333.1 | + | 313 | 378 |
| Dli-2-10 | GU322332.1 | + | 312 | 377 |
| Dpa-1-2  | GU322315.1 | + | 321 | 386 |
| Dge-1-7  | GU322275.1 | + | 317 | 382 |
| Dge-1-8  | GU322274.1 | + | 311 | 376 |
| Dge-1-9  | GU322273.1 | + | 311 | 376 |
| Dge-1-10 | GU322272.1 | + | 311 | 376 |
| Dli-2-11 | GU322256.1 | + | 314 | 379 |
| Dli-2-12 | GU322255.1 | + | 315 | 380 |
| Dli-2-13 | GU322254.1 | + | 313 | 378 |
| Dli-1-3  | GU322305.1 | + | 310 | 375 |
| Dli-1-4  | GU322203.1 | + | 311 | 376 |
| Dli-1-5  | GU322167.1 | + | 310 | 375 |
| Dli-1-6  | GU322166.1 | + | 311 | 376 |
| Dli-1-7  | GU322168.1 | + | 310 | 375 |
| Dpa-1-3  | GU322314.1 | + | 310 | 375 |
| Dpa-1-4  | GU322313.1 | + | 311 | 376 |
| Dca-1-1  | GU322206.1 | + | 308 | 373 |
| Dca-1-2  | GU322205.1 | + | 308 | 373 |
| Dge-1-11 | GU322323.1 | + | 310 | 375 |
| Dae-1-3  | GU322185.1 | + | 313 | 378 |
| Dla-1-2  | GU322290.1 | + | 311 | 376 |
| Dla-1-3  | GU322292.1 | + | 312 | 377 |
| Dge-1-12 | GU322261.1 | + | 311 | 376 |
| Dla-1-4  | GU322234.1 | + | 311 | 376 |
| Dsc-1-60 | GU322224.1 | + | 312 | 377 |
| Dge-1-13 | GU322285.1 | + | 311 | 376 |
| Dge-1-14 | GU322321.1 | + | 311 | 376 |
| Dge-1-15 | GU322319.1 | + | 306 | 371 |
| Dge-1-16 | GU322317.1 | + | 312 | 377 |
| Dge-1-17 | GU322316.1 | + | 307 | 372 |
| Dge-1-18 | GU322286.1 | + | 311 | 376 |
| Dge-1-19 | GU322284.1 | + | 311 | 376 |
| Dge-1-20 | GU322269.1 | + | 312 | 377 |
| Dge-1-21 | GU322262.1 | + | 310 | 375 |
| Dla-1-5  | GU322221.1 | + | 311 | 376 |
| Dge-1-22 | GU322199.1 | + | 312 | 377 |
| Dge-1-23 | GU322195.1 | + | 312 | 377 |
| Dli-2-14 | GU322257.1 | + | 310 | 375 |
| Dbo-1-1  | GU322239.1 | + | 262 | 327 |
| Dbo-1-2  | GU322238.1 | + | 304 | 369 |
| Dbo-1-3  | GU322237.1 | + | 311 | 376 |

|          |            |   |     |     |
|----------|------------|---|-----|-----|
| Dbo-1-4  | GU322235.1 | + | 311 | 376 |
| Dli-1-8  | GU322299.1 | + | 310 | 375 |
| Dli-2-15 | GU322310.1 | + | 309 | 374 |
| Dli-2-16 | GU322311.1 | + | 310 | 375 |
| Dli-2-17 | GU322214.1 | + | 311 | 376 |
| Dli-2-18 | GU322210.1 | + | 311 | 376 |
| Dli-2-19 | GU322165.1 | + | 310 | 375 |
| Dli-2-20 | GU322161.1 | + | 309 | 374 |
| Dli-2-21 | GU322211.1 | + | 312 | 376 |
| Dsc-1-61 | GU322222.1 | + | 313 | 378 |
| Dli-2-22 | GU322336.1 | + | 313 | 378 |
| Dsc-1-62 | GU322223.1 | + | 313 | 378 |
| Dge-1-24 | GU322264.1 | + | 312 | 377 |
| Dge-1-25 | GU322263.1 | + | 312 | 377 |
| Dla-1-6  | GU322289.1 | + | 315 | 380 |
| Dbal-1-3 | GU322295.1 | + | 314 | 379 |
| Dbal-1-4 | GU322298.1 | + | 314 | 379 |
| Dbal-1-5 | GU322297.1 | + | 314 | 379 |
| Dbal-1-6 | GU322296.1 | + | 314 | 379 |
| Dge-1-26 | GU322247.1 | + | 313 | 378 |
| Dae-1-4  | GU322184.1 | + | 313 | 378 |
| Dae-1-5  | GU322183.1 | + | 313 | 378 |
| Dae-1-6  | GU322180.1 | + | 313 | 378 |
| Dli-1-9  | GU322301.1 | + | 307 | 372 |
| Dge-1-27 | GU322153.1 | + | 311 | 376 |
| Dge-1-28 | GU322151.1 | + | 311 | 376 |
| Dge-1-29 | GU322322.1 | + | 311 | 376 |
| Dge-1-30 | GU322320.1 | + | 311 | 376 |
| Dge-1-31 | GU322318.1 | + | 310 | 375 |
| Dla-1-7  | GU322291.1 | + | 312 | 377 |
| Dge-1-32 | GU322277.1 | + | 311 | 376 |
| Dge-1-33 | GU322276.1 | + | 311 | 376 |
| Dge-1-34 | GU322268.1 | + | 312 | 377 |
| Dge-1-35 | GU322266.1 | + | 312 | 377 |
| Dge-1-36 | GU322246.1 | + | 313 | 378 |
| Dge-1-37 | GU322245.1 | + | 311 | 376 |
| Dge-1-38 | GU322244.1 | + | 311 | 376 |
| Dge-1-39 | GU322241.1 | + | 311 | 376 |
| Dla-1-8  | GU322233.1 | + | 306 | 371 |
| Dla-1-9  | GU322232.1 | + | 312 | 377 |
| Dla-1-10 | GU322231.1 | + | 311 | 376 |
| Dla-1-11 | GU322219.1 | + | 312 | 377 |
| Dla-1-12 | GU322218.1 | + | 312 | 377 |
| Dca-1-3  | GU322207.1 | + | 309 | 374 |
| Dge-1-40 | GU322198.1 | + | 312 | 377 |
| Dge-1-41 | GU322197.1 | + | 310 | 375 |
| Dge-1-42 | GU322196.1 | + | 311 | 376 |
| Dge-1-43 | GU322338.1 | + | 311 | 370 |
| Dli-1-10 | GU322308.1 | + | 310 | 375 |
| Dli-1-11 | GU322307.1 | + | 311 | 376 |
| Dli-1-12 | GU322304.1 | + | 310 | 375 |
| Dli-1-13 | GU322302.1 | + | 310 | 375 |

|          |            |   |     |     |
|----------|------------|---|-----|-----|
| Dli-1-14 | GU322204.1 | + | 310 | 375 |
| Dli-1-15 | GU322200.1 | + | 310 | 375 |
| Dli-1-16 | GU322170.1 | + | 310 | 375 |
| Dge-1-44 | GU322341.1 | + | 312 | 377 |
| Dge-1-45 | GU322339.1 | + | 312 | 377 |
| Dge-1-46 | GU322337.1 | + | 312 | 377 |
| Dge-1-47 | GU322265.1 | + | 312 | 377 |
| Dli-1-17 | GU322169.1 | + | 311 | 376 |
| Dae-1-7  | GU322182.1 | + | 313 | 378 |

Duplicate sequences: the following putative homologs are not shown in the alignment because their sequences are identical to a homolog already shown: Dae-1-4, Dae-1-5, Dae-1-6, Dba-1-5, Dba-1-6, Dbo-1-2, Dbo-1-3, Dbo-1-4, Dca-1-1, Dca-1-2, Dca-1-3, Dge-1-10, Dge-1-12, Dge-1-15, Dge-1-16, Dge-1-17, Dge-1-18, Dge-1-19, Dge-1-20, Dge-1-21, Dge-1-22, Dge-1-23, Dge-1-25, Dge-1-26, Dge-1-28, Dge-1-3, Dge-1-30, Dge-1-31, Dge-1-32, Dge-1-33, Dge-1-34, Dge-1-35, Dge-1-36, Dge-1-37, Dge-1-38, Dge-1-39, Dge-1-4, Dge-1-40, Dge-1-41, Dge-1-42, Dge-1-45, Dge-1-46, Dge-1-47, Dge-1-7, Dge-1-8, Dge-1-9, Dla-1-10, Dla-1-11, Dla-1-12, Dla-1-4, Dla-1-5, Dla-1-7, Dla-1-8, Dla-1-9, Dli-1-11, Dli-1-12, Dli-1-13, Dli-1-14, Dli-1-15, Dli-1-16, Dli-1-4, Dli-1-5, Dli-1-6, Dli-2-10, Dli-2-11, Dli-2-12, Dli-2-13, Dli-2-18, Dli-2-19, Dli-2-20, Dli-2-5, Dli-2-6, Dpa-1-2, Dpa-1-4, Dsc-1-11, Dsc-1-16, Dsc-1-18, Dsc-1-20, Dsc-1-21, Dsc-1-22, Dsc-1-23, Dsc-1-24, Dsc-1-25, Dsc-1-26, Dsc-1-27, Dsc-1-28, Dsc-1-29, Dsc-1-3, Dsc-1-30, Dsc-1-31, Dsc-1-32, Dsc-1-33, Dsc-1-34, Dsc-1-35, Dsc-1-36, Dsc-1-37, Dsc-1-38, Dsc-1-39, Dsc-1-40, Dsc-1-41, Dsc-1-42, Dsc-1-43, Dsc-1-44, Dsc-1-45, Dsc-1-46, Dsc-1-47, Dsc-1-48, Dsc-1-49, Dsc-1-50, Dsc-1-51, Dsc-1-52, Dsc-1-53, Dsc-1-54, Dsc-1-57, Dsc-1-58, Dsc-1-6, Dsc-1-62, Dsc-1-7, Dsc-1-9

## 2.3 Multiple-sequence alignment

Each type I hammerhead ribozyme is denoted by an abbreviation (like “Eco-1-1”) that refers to a taxonomy given in Section 2.1. The alignment includes sequences containing the RNA motif, as well as flanking sequence. The type I hammerhead ribozyme itself is denoted by the line underneath marked 5' and 3' on either end. Nucleotides in the flanking sequences (i.e., not part of the motif) are written in gray letters. Stems of predicted rho-independent transcription terminators are shaded yellow. (Note: terminator predictions have not been analyzed manually, and many are likely to be false positives.) Start codons are shaded green. (Note: start codons are frequently misannotated, especially in environmental samples.) Nucleotides proposed to basepair as part of the consensus structure are shaded in color when they comprise Watson-Crick or G-U pairs. Otherwise they are shaded gray. Conserved stems are also indicated at the bottom of the alignment by angle brackets, where matching < and > denote

base-paired columns. Below these angle brackets, the symbol “2” denotes base pairs exhibiting covariation, “1” denotes base pairs exhibiting compatible mutations, “0” denotes base pairs that are not observed to mutate and “?” denotes base pairs that have a significant frequency of non-canonical nucleotides for Watson-Crick or G-U pairs (> 5%). Below these base pair annotation is the consensus sequence: “R” = “A” or “G”, “Y” = “C” or “U”, red nucleotides: nucleotide identity conserved more than 97% of the time, black nucleotides: 90%, gray nucleotides: 75%, red circle (◉): nucleotide is present 97% of the time, black circle (●): 90%, gray circle (◐): 75%, white circle (○): 50%. All percentages of sequences just described (e.g. 97% conserved) assume that sequences have been weighted by the GSC algorithm implemented by the Infernal software.

alignment positions 1...67

```

Dae-1-1 UGUACCCUUUUGCCCUGCUGAUGAAGUCGGGGGAGACUGAAAGGGUUGACUCUACAGGGCUAUUACA
Dge-1-1 UGUUCCCU .CUACCCCGCUGAUGAGGUCCGGGGAGCCGAAAGGUCGACUCUACGGGGCUAUACA
Dae-1-2 UGUUCCCU .CUGCCCGCUGAUGAAGUCGGGG .AGACUGAAAGAGUCGACUCUACAGGGCUAUACA
Dli-2-1 UGUUCCCU .CUACCCUGCUGAUGAGGUCCAGGAAGACCGAAAGGGUCGACUCUACGGGGCUAUACA
Dpa-1-1 UGUUCCCU .CUGCCCGCUGAUGAGGUCCGGGAGACCGAAAGGGUCGACUCUACGGGACUGUAACA
Dba-1-1 UGUUCCCU .CUGCCCGCUGAUGAGGUCCGGGGAGACCGAAAGGGUCGACACUACGAUGCUAUACA
Dli-2-2 UGUUCCCU .AUGCCCGCUGAUGAGGUCCGGGACACCGAAAGGGUCUACUCUACGGGGCUAUACA
Dli-2-3 UGUUCCCUAUUGCCCGCUGAUGAAGUCGGGGAGACUGAAAGGGUCGACUCUACAGGGCUAUACA

<<<< . . . . . <<<<<< . . . . . <<<< . . . . . >>>> . . . . . <<<< . . . . . >>>> . >>>> . . . . . >>>>
?00? . . . . . 001121 . . . . . 2011 . . . . . 1102 . . . . . 00?0 . . . . . 0?00 . 121100 . . ?00?
. . . . . <<<<<< . . . . . >>>>>> . . . . .
. . . . . ?111? . . . . . ?111? . . . . .
UGUUCCCU - CUGCCCGCUGAUGAGGUCRGGRGAGACCGAAAGRGUGACUCUACCGGGCUAUACA

```

Dsc-1-1 UGUUCCCU . CUGCCCUGCUGAUGAGGUCGGUGAA GACUGAAAGGGUCGACUCUACGGGGCUUUUACA

Dli-2-4 UGUUCCUU . CUGCCCCGCGUGACGAGGUUGGGGAAGACCGAAAGGGUCGACUCUACGGGGCUAUUACA

Dge-1-2 UGUUCCCU . CUGCCCUGCUGAUGAGGUCGGGGAA GACCGAAAGGGUUGCCUACGGGGCUAUAACA

Dsc-1-2 UGUUCCCU . CUGCCCUGCUGAUGAGGUCAGGGAA GACUGAAAGGUGCGACUCUACGGGGCUAUAACA

Dsc-1-4 UGUUCCCU . CUGCCCAGCUGAUGAGGUCAGGGAGACCGAAAGUGUCGACUCUACGGGGCUAUAACA

Dbo-2-1 UGUUCCCU . CUGCCUUGCUGAUGAGGUCGGGGAA GACCGAAAGGGUCGACUCUACGGGGCUAUAACA

Dbo-2-2 UGUUCCCU . CUGCCUUGCUGAUGAGGUCGGGGAA GACCGAAAGGGUCGACUCUACGGGGCUAUAACA

Dli-1-1 UGUUCCCU . CUGCUCCGCGUGAUGAGGUCGGGGAA GACCGAAAGGGUUGACUCUACGGGGCUAUAACA

Dba-1-2 UGUUCCCU . CUGCCCCGCGUGAUGAGGUCGGGGAA GACCGAAAGGGUCGCCUACGGGACUUAUACA

Dge-1-5 UGUUCCCU . CUGCCCCGCGUGAUGAGGUCGGGGAA GACCGAAAGGUGCGACUCUACGGGGCUAUAACA

Dge-1-6 UGUUCCCU . CUGCCCCGCGUGAUGAGGUCGGGGAGACCGAAAGUGUCGACUCUACGGGGCUAUUACC

Dsc-1-5 UGUUCCCU . CUGCCCCGCGUGAUGAGGUCAGGGAA GACCGAAAGGUGUGACUCUACGGGGCUAUAACA

Dsc-1-8 UGUUCCCU . CUGCCCCGCGUGAUGAGGUCAGGGAA GACCGAAAGGUGUGCGACUCUACGGGUGCUAUAACA

Dsc-1-10 UGUUCCCU . CUGCCCCGCGUGAUGAGGUCAGGAAAGACCGAAAGUGUCGACUCUACGGGGCUAUAACA

Dsc-1-12 UGUUCCCU . CUGCCCCGCGUGAUGAGGUCAGGGAGACCGAAAGUGUCGACUCUACGGGGCUAUAACA

Dsc-1-13 UGUUCCCU . CUGCGCCGCGUGAUGAGGUCAGGGAA GACCGAAAGGUGUGCGACUCUACGGGGCUAUAACA

Dsc-1-14 UGUUCCCU . CUGCUCCGCGUGAUGAGGUCAGGGAA GACCGAAAGUGUCGACUCUACGGGGCUAUAACA

Dsc-1-15 UGUUCCCU . CUGCCCCGCGUGAUGAGGUCAGGGAAACCGAAAGUGUCGACUCUACGGGGCUAUAACA

Dsc-1-17 UGUUCCCU . CUGCCCCGCGUGAUGAGGUCAGGGAA GACCGAAAGGUGUGCGACUCUACAGGGCUAUAACA

Dsc-1-19 UGUUCCCU . CUGCCCCGCGUGAUGAGGUCAGGGAA GACCGAAAGUGUCGACUCUACGGGGCUAUAACA

Dsc-1-55 UGUUCCCU . CUGCCCCGCGUGAUGAGGUCAGGGAA GACCGAAAGUGUCGACUCUACGGG . CUUAUAACA

Dsc-1-56 UGUUCCCU . CUGCCCCGCGUGAUGAGGUCAGGGAA GACUGAAAGGUGUGCGACUCUACGGGGCUAUAACA

Dsc-1-59 UGUUCCCU . CUGCCCCGCGUGAUGAGGUCAGGGAA GACCGAAAGUGUCGACUCUACGGGGCUAUUACA

Dli-2-2 UGUUCCCU . CUGCCCCGCGUGAUGAGGUCGGGAAAGACCGAAAGGGUCAACUCUACGGGGCUAUAACA

Dla-1-1 UGUUCCCU . CUGCCCCGCGUGAUGAGGUCGGGGAG . CCGAAAGGGUCGACUCUACGGGGCUAUAACA

Dli-2-7 UGUUCC . U . CUGCCCUGCUGAUGAGGUCGGGAA GACCGAAAGGGUCGACUCUACGGGGCUAUAACA

Dli-2-8 UGUUCC . U . CUGCCCUGC . GAUGAGGUCGGGAA GACCGAAAGGGUCGACUCUACGGGGCUAUAACA

Dli-2-9 UGUUCCCU . CUGCCCUGCUGAUGAGGUCGGGGAA GACCGAAAGGGUCGACUCUACGGGGCUAUAACA

Dli-1-3 UGUUCCCU . GUGCCCUGCUGAUGAGGUCGGGGAA GACCGAAAGGGUCGACUCUACGGGGCUAUAACA

Dli-1-7 UGUUCCCU . GUGCCCUGCUGAUGAGGUCGGGGAA GACCGAAAGGGUCGACUCUACGGGGCUAUUACC

Dpa-1-3 UGUUCCCU . CUGCCCUGCUGAUGAAGUCGGGGAA GACUGAAAGGGUCGACUCUACGGGGCUAUUACA

Dge-1-11 UGUUCCCU . CUGCCCUGCUGAUGAGGUCGGGGAA GACUGAAAGGGUCGACUCUACGGGGCUAUUACA

Dae-1-3 UGUUCCCU . CUGCCCCGCGUGAUGAGGUCGGGGAA GACUGAAAGGGUCGACUCUACGGGGCUAUUACA

Dla-1-2 UGUUCCCU . CUGCCCCGCGUGAUGAGGUCGGGGAA GACUGAAAGGGUCGACUCUACGGGGCUAUAACA

Dla-1-3 UGUUCCCU . CUGCCCCGCGUGAUGAGGUCGGGGAA GACUGAAAGGGUCGACUCUACGGGGCUAUAACA

Dsc-1-60 UGUUCCCU . CUGCCCCGCGUGAUGAGGUCGGGGAA GACCGAAAGGUGCGACUCUACGGGGCUAUUACA

Dge-1-13 UGUUCCCU . CUGCCCCGCGUGAUGAGGUCGGGGAA GACCGAAAGGUGUGCGACUCUACGGGGCUAUUACA

Dge-1-14 UGUUCCCU . CUGCCCCGCGUGAUGAGGUCGGGGAA GACCGAAAGGUGUGCGACUCUACGGGGCUAUAACA

Dli-2-14 UGUUCCCU . CUGCCCCGCGUGACGAGGUCGGGGAA GACCGAAAGGGUCGACUCUACGGGGCUAUAACA

Dbo-1-1 UGUUCCCU . CUGCCCCGCGUGACGAGGUCGGGGAA GACCGAAAGGGUCGACUCUACGGGGCUAUAACA

Dli-1-8 UGUUCCCU . CUGCCCCGCGUGAUGAGGUCGGGGAA GACCGAAAGGGUCGACUCUACGGGGCUAUUACA

Dli-2-15 UGUUCCCU . CUGCCCCGCGUGACGAGGUCGGGGAA GACCGAAAGGGUCGACUCUACGGGGCUAUUACA

Dli-2-16 UGUUCCCU . CUGCCCCGCGUGACGAGGUCGGGGAA GACCGAAAGGGUCGACUCUACGGGGCUAUUACA

Dli-2-17 UGUUCCCU . CUGCCCCGCGUGACGAGGUCGGGGAA GACCGAAAGGGUCGACUCUACGGGGCUAUUACA

Dli-2-21 UGUUCC . U . CUGCCCCGCGUGACGAGGUCGGGGAA GACCGAAAGGGUCGACUCUACGGGGCUAUUACA

Dsc-1-61 UGUUCCCU . AUGCCCCGCGUGAAGGUCGGGGAA GACCGAAAGGGUCGACUCUACGGGGCUAUUACA

Dli-2-22 UGUUCCCU . AUGCCCCGCGUGAUGAGGUCGGGGAA GACCGAAAGGGUCGACUCUACGGGGCUAUUACA

Dge-1-24 UGUUCCCU . CUGCCCCGCGUGAUGAGGUCGGGGAA GACCGAAAGGGUCGACUCUACGGGGCUAUAACA

Dla-1-6 UGUUCCCU . CUGCCCCGCGUGAUGAGGUCGGGGAA GACCGAAAGGGUUGACUCUACGGGGCUAUAACA

Dba-1-3 UGUUCCCU . CUGCCCCGCGUGAUGAGGUCGGGGAA GACCGAAAGGGUCAACUCUACGGGGCUAUUACA

Dba-1-4 UGUUCCCU . CUGCCCCGCGUGAUGAGGUCGGGGAA GACCGAAAGGGUCGACUCUACGGGGCUAUUACA

Dli-1-9 UGUUCCCU . CCGCCCCGCGUGAUGAGGUCGGGGAA GACCGAAAGGGUCGACUCUACGGGGCUAUAACA

Dge-1-27 UGUUCCCU . CUGCCCCGCGUGAUGAGGUCGGGGAA GACCGAAAGGGUCGACUCUACGGGGCUAUAACA

Dge-1-29 UGUUCCCU . CUGCCCCGCGUGAUGAGGUCGGGGAA GACCGAAAGGGUCGACUCUACGGGGCUAUAACA

Dge-1-43 UGUUCCCU . CUGCCCCGCGUGAUGAGGUC . . . . GACCGAAAGGGUCGACUCUACGGGGCUAUAACA

Dli-1-10 UGUUCCCU . CUGCCCCGCGUGAUGAGGUCGGGGAA GACCGAAAGGGUCGACUCUACGGGGCUAUAACA

Dge-1-44 UGUUCCCU . CUGCCCCGCGUGAUGAGGUCAGGGAA GACCGAAAGGGUCGACUCUACGGGGCUAUAACA

Dli-1-17 UGUUCCCU . CUGCCCCGCGUGAUGAGGUCGGGGAA GACCGAAAGGGUCGACUCUACGGGGCUAUAACA

Dae-1-7 UGUUCCCU . CUGCCCCGCGUGAUGAGGUCGGGGAA GACCGAAAGGGUCGACUCUACGGGGCUAUUACA

<<<< . . . . <<<< . . . . <<<< . . . . >>>> . . . . <<<< . . . . >>>> . . . . >>>> . . . . >>>>

?00? . . . . 001121 . . . . 2011 . . . . 1102 . . . . 00?0 . . . . 0?00 . 121100 . . ?00?

. . . . <<<< . . . . >>>> . . . . >>>>

. . . . ?111? . . . . ?111?

UGUUCCCU - CUGCCCYCUGAUGAGGUCRGGGRAGACCGAAAGRGUCACUCUACGGGCUAUACA

### 3 Type II hammerhead ribozymes

#### 3.1 Taxa

The taxonomy of each organism containing a putative type II hammerhead ribozyme is listed, with abbreviations identifying each hit (e.g., “Eco-1-1” and “Eco-1-2” might hypothetically represent two distinct RNAs in *E. coli*). The abbreviations will be used to identify each individual type II hammerhead ribozyme in Sections 3.2 and 3.3.

| abbrev. of hits    | taxonomy of species                                                                                                                                              |
|--------------------|------------------------------------------------------------------------------------------------------------------------------------------------------------------|
| CSo-1-1            | Bacteria Acidobacteria Solibacteres Solibacterales Solibacteraceae <i>Candidatus Solibacter usitatus</i> Ellin6076                                               |
| Mva-1-1            | Bacteria Actinobacteria Actinobacteridae Actinomycetales Corynebacterineae Mycobacteriaceae <i>Mycobacterium vanbaalenii</i> PYR-1                               |
| Str-1-1            | Bacteria Actinobacteria Actinobacteridae Actinomycetales Micromonosporineae Micromonosporaceae <i>Salinispora tropica</i> CNB-440                                |
| Ssp-1-1 to Ssp-1-2 | Bacteria Actinobacteria Actinobacteridae Actinomycetales Streptomycineae Streptomycetaceae <i>Streptomyces</i> sp. AA4                                           |
| Bce-1-1            | Bacteria Firmicutes Bacillales Bacillaceae Bacillus Bacillus cereus group <i>Bacillus cereus</i> ATCC 14579                                                      |
| Bce-2-1 to Bce-2-2 | Bacteria Firmicutes Bacillales Bacillaceae Bacillus Bacillus cereus group <i>Bacillus cereus</i> BDRD-Cer4                                                       |
| Bce-3-1 to Bce-3-2 | Bacteria Firmicutes Bacillales Bacillaceae Bacillus Bacillus cereus group <i>Bacillus cereus</i> BDRD-ST24                                                       |
| Bce-4-1            | Bacteria Firmicutes Bacillales Bacillaceae Bacillus Bacillus cereus group <i>Bacillus cereus</i> H3081.97                                                        |
| Bth-1-1 to Bth-1-2 | Bacteria Firmicutes Bacillales Bacillaceae Bacillus Bacillus cereus group <i>Bacillus thuringiensis</i> IBL 4222                                                 |
| Bth-2-1            | Bacteria Firmicutes Bacillales Bacillaceae Bacillus Bacillus cereus group <i>Bacillus thuringiensis</i> serovar <i>israelensis</i> ATCC 35646                    |
| Bth-3-1 to Bth-3-2 | Bacteria Firmicutes Bacillales Bacillaceae Bacillus Bacillus cereus group <i>Bacillus thuringiensis</i> serovar <i>sotto</i> str. T04001                         |
| Gsp-1-1            | Bacteria Firmicutes Bacillales Bacillaceae <i>Geobacillus</i> sp. Y412MC10                                                                                       |
| Bbr-1-1            | Bacteria Firmicutes Bacillales Paenibacillaceae <i>Brevibacillus brevis</i> NBRC 100599                                                                          |
| Cas-1-1 to Cas-1-2 | Bacteria Firmicutes Clostridia Clostridiales Clostridiaceae <i>Clostridium asparagiforme</i> DSM 15981                                                           |
| Csc-1-1 to Csc-1-3 | Bacteria Firmicutes Clostridia Clostridiales Clostridiaceae <i>Clostridium scindens</i> ATCC 35704                                                               |
| Eve-1-1 to Eve-1-2 | Bacteria Firmicutes Clostridia Clostridiales Eubacteriaceae <i>Eubacterium ventriosum</i> ATCC 27560                                                             |
| Aco-1-1 to Aco-1-4 | Bacteria Firmicutes Clostridia Clostridiales Ruminococcaceae <i>Anaerotruncus colihominis</i> DSM 17241                                                          |
| Fpr-1-1 to Fpr-1-2 | Bacteria Firmicutes Clostridia Clostridiales Ruminococcaceae <i>Faecalibacterium prausnitzii</i> A2-165                                                          |
| Rfl-1-1 to Rfl-1-2 | Bacteria Firmicutes Clostridia Clostridiales Ruminococcaceae <i>Ruminococcus flavefaciens</i> FD-1                                                               |
| Rgn-1-1            | Bacteria Firmicutes Clostridia Clostridiales Ruminococcaceae <i>Ruminococcus gnavus</i> ATCC 29149                                                               |
| Rob-1-1 to Rob-1-4 | Bacteria Firmicutes Clostridia Clostridiales Ruminococcaceae <i>Ruminococcus obeum</i> ATCC 29174                                                                |
| Sva-1-1 to Sva-1-4 | Bacteria Firmicutes Clostridia Clostridiales Ruminococcaceae <i>Subdoligranulum variabile</i> DSM 15176                                                          |
| Atu-1-1 to Atu-1-3 | Bacteria Proteobacteria Alphaproteobacteria Rhizobiales Rhizobiaceae Rhizobium/Agrobacterium group <i>Agrobacterium tumefaciens</i> str. C58                     |
| Rsp-1-1            | Bacteria Proteobacteria Alphaproteobacteria Rhodobacterales Rhodobacteraceae <i>Roseobacter</i> sp. SK209-2-6                                                    |
| Bbr-2-1 to Bbr-2-2 | Bacteria Proteobacteria Betaproteobacteria Burkholderiales Alcaligenaceae <i>Bordetella bronchiseptica</i> RB50                                                  |
| Bce-5-1            | Bacteria Proteobacteria Betaproteobacteria Burkholderiales Burkholderiaceae Burkholderia Burkholderia cepacia complex <i>Burkholderia cenocepacia</i> J2315      |
| Bmu-1-1            | Bacteria Proteobacteria Betaproteobacteria Burkholderiales Burkholderiaceae Burkholderia Burkholderia cepacia complex <i>Burkholderia multivorans</i> ATCC 17616 |
| Bok-1-1 to Bok-1-3 | Bacteria Proteobacteria Betaproteobacteria Burkholderiales Burkholderiaceae Burkholderia pseudomallei group <i>Burkholderia oklahomensis</i> EO147               |
| Bps-1-1            | Bacteria Proteobacteria Betaproteobacteria Burkholderiales Burkholderiaceae Burkholderia pseudomallei group <i>Burkholderia pseudomallei</i> 7894                |
| Bps-2-1            | Bacteria Proteobacteria Betaproteobacteria Burkholderiales Burkholderiaceae Burkholderia pseudomallei group <i>Burkholderia pseudomallei</i> DM98                |
| Rso-1-1            | Bacteria Proteobacteria Betaproteobacteria Burkholderiales Burkholderiaceae <i>Ralstonia solanacearum</i> IPO1609                                                |
| Rso-2-1            | Bacteria Proteobacteria Betaproteobacteria Burkholderiales Burkholderiaceae <i>Ralstonia solanacearum</i> UW551                                                  |
| Cvi-1-1            | Bacteria Proteobacteria Betaproteobacteria Neisseriales Neisseriaceae <i>Chromobacterium violaceum</i> ATCC 12472                                                |

|                     |                                                                                                                                                                                                |
|---------------------|------------------------------------------------------------------------------------------------------------------------------------------------------------------------------------------------|
| Dde-1-1             | Bacteria Proteobacteria Deltaproteobacteria Desulfovibrionales Desulfovibrionaceae <i>Desulfovibrio desulfuricans subsp. desulfuricans str. G20</i>                                            |
| Dma-1-1             | Bacteria Proteobacteria Deltaproteobacteria Desulfovibrionales Desulfovibrionaceae <i>Desulfovibrio magneticus</i> RS-1                                                                        |
| Dpi-1-1 to Dpi-1-6  | Bacteria Proteobacteria Deltaproteobacteria Desulfovibrionales Desulfovibrionaceae <i>Desulfovibrio piger</i> ATCC 29098                                                                       |
| Dvu-1-1 to Dvu-1-3  | Bacteria Proteobacteria Deltaproteobacteria Desulfovibrionales Desulfovibrionaceae <i>Desulfovibrio vulgaris</i> RCH1                                                                          |
| Dvu-2-1             | Bacteria Proteobacteria Deltaproteobacteria Desulfovibrionales Desulfovibrionaceae <i>Desulfovibrio vulgaris str. 'Miyazaki F'</i>                                                             |
| Dvu-3-1 to Dvu-3-3  | Bacteria Proteobacteria Deltaproteobacteria Desulfovibrionales Desulfovibrionaceae <i>Desulfovibrio vulgaris str. Hildenborough</i>                                                            |
| Dac-1-1             | Bacteria Proteobacteria Deltaproteobacteria Desulfuromonadales Desulfuromonadaceae <i>Desulfuromonas acetoxidans</i> DSM 684                                                                   |
| Tau-1-1 to Tau-1-2  | Bacteria Proteobacteria Gammaproteobacteria Aeromonadales Aeromonadaceae <i>Tolomonas auensis</i> DSM 9187                                                                                     |
| Sba-1-1             | Bacteria Proteobacteria Gammaproteobacteria Alteromonadales Shewanellaceae <i>Shewanella baltica</i> OS185                                                                                     |
| Sba-2-1             | Bacteria Proteobacteria Gammaproteobacteria Alteromonadales Shewanellaceae <i>Shewanella baltica</i> OS195                                                                                     |
| Son-1-1 to Son-1-2  | Bacteria Proteobacteria Gammaproteobacteria Alteromonadales Shewanellaceae <i>Shewanella oneidensis</i> MR-1                                                                                   |
| Spu-1-1 to Spu-1-3  | Bacteria Proteobacteria Gammaproteobacteria Alteromonadales Shewanellaceae <i>Shewanella putrefaciens</i> 200                                                                                  |
| Ssp-2-1             | Bacteria Proteobacteria Gammaproteobacteria Alteromonadales Shewanellaceae <i>Shewanella sp.</i> W3-18-1                                                                                       |
| Tsp-1-1             | Bacteria Proteobacteria Gammaproteobacteria Chromatiales Ectothiorhodospiraceae <i>Thioalkalivibrio sp.</i> HL-EbGR7                                                                           |
| Msp-1-1 to Msp-1-4  | Bacteria Proteobacteria Gammaproteobacteria Oceanospirillales <i>Marinomonas sp.</i> MED121                                                                                                    |
| Aba-1-1             | Bacteria Proteobacteria Gammaproteobacteria Pseudomonadales Moraxellaceae <i>Acinetobacter baumannii</i> SDF                                                                                   |
| Pae-1-1             | Bacteria Proteobacteria Gammaproteobacteria Pseudomonadales Pseudomonadaceae <i>Pseudomonas aeruginosa</i> LESB58                                                                              |
| Vch-1-1             | Bacteria Proteobacteria Gammaproteobacteria Vibrionales Vibrionaceae <i>Vibrio cholerae</i> 12129(1)                                                                                           |
| Vch-2-1             | Bacteria Proteobacteria Gammaproteobacteria Vibrionales Vibrionaceae <i>Vibrio cholerae</i> 2740-80                                                                                            |
| Vch-3-1 to Vch-3-4  | Bacteria Proteobacteria Gammaproteobacteria Vibrionales Vibrionaceae <i>Vibrio cholerae</i> O395                                                                                               |
| Vch-4-1             | Bacteria Proteobacteria Gammaproteobacteria Vibrionales Vibrionaceae <i>Vibrio cholerae</i> TM 11079-80                                                                                        |
| Vch-5-1             | Bacteria Proteobacteria Gammaproteobacteria Vibrionales Vibrionaceae <i>Vibrio cholerae</i> TMA 21                                                                                             |
| Vch-6-1             | Bacteria Proteobacteria Gammaproteobacteria Vibrionales Vibrionaceae <i>Vibrio cholerae</i> V51                                                                                                |
| Yli-1-1             | Eukaryota Fungi Dikarya Ascomycota Saccharomycotina Saccharomycetes Saccharomycetales Dipodascaceae <i>Yarrowia lipolytica</i> CLIB122                                                         |
| Aae-1-1 to Aae-1-2  | Eukaryota Metazoa Arthropoda Hexapoda Insecta Pterygota Neoptera Endopterygota Diptera Nematocera Culicoidea Culicidae Culicinae Culicini Aedes Stegomyia <i>Aedes aegypti</i>                 |
| Gga-1-1 to Gga-1-6  | Eukaryota Metazoa Chordata Craniata Vertebrata Euteleostomi Archosauria Dinosauria Saurischia Theropoda Coelurosauria Aves Neognathae Galliformes Phasianidae Phasianinae <i>Gallus gallus</i> |
| Rno-1-1 to Rno-1-4  | Eukaryota Metazoa Chordata Craniata Vertebrata Euteleostomi Mammalia Eutheria Euarchontoglires Glires Rodentia Sciurognathi Muroidea Muridae Murinae <i>Rattus norvegicus</i>                  |
| Mmu-1-1 to Mmu-1-2  | Eukaryota Metazoa Chordata Craniata Vertebrata Euteleostomi Mammalia Eutheria Euarchontoglires Primates Haplorrhini Catarrhini Cercopithecoidea Cercopithecoidea <i>Macaca mulatta</i>         |
| Hsa-1-1 to Hsa-1-12 | Eukaryota Metazoa Chordata Craniata Vertebrata Euteleostomi Mammalia Eutheria Euarchontoglires Primates Haplorrhini Catarrhini Hominidae <i>Homo sapiens</i>                                   |
| Ptr-1-1 to Ptr-1-2  | Eukaryota Metazoa Chordata Craniata Vertebrata Euteleostomi Mammalia Eutheria Euarchontoglires Primates Haplorrhini Catarrhini Hominidae <i>Pan troglodytes</i>                                |
| Clu-1-1 to Clu-1-2  | Eukaryota Metazoa Chordata Craniata Vertebrata Euteleostomi Mammalia Eutheria Laurasiatheria Carnivora Caniformia Canidae <i>Canis lupus familiaris</i>                                        |
| Bta-1-1 to Bta-1-2  | Eukaryota Metazoa Chordata Craniata Vertebrata Euteleostomi Mammalia Eutheria Laurasiatheria Cetartiodactyla Ruminantia Pecora Bovidae Bovinae <i>Bos taurus</i>                               |
| Eca-1-1 to Eca-1-2  | Eukaryota Metazoa Chordata Craniata Vertebrata Euteleostomi Mammalia Eutheria Laurasiatheria Perissodactyla Equidae <i>Equus caballus</i>                                                      |
| Nve-1-1             | Eukaryota Metazoa Cnidaria Anthozoa Hexacorallia Actiniaria Edwardsiidae <i>Nematostella vectensis</i>                                                                                         |
| Bam-1-1             | Viruses dsDNA viruses, no RNA stage Caudovirales Myoviridae <i>Burkholderia ambifaria phage</i> BcepF1                                                                                         |
| Bph-1-1             | Viruses dsDNA viruses, no RNA stage Caudovirales Myoviridae <i>Burkholderia phage</i> BcepB1A                                                                                                  |
| Bph-2-1             | Viruses dsDNA viruses, no RNA stage Caudovirales Myoviridae <i>Burkholderia phage</i> KS10                                                                                                     |

|                  |                                                                                                                                                  |
|------------------|--------------------------------------------------------------------------------------------------------------------------------------------------|
| Bph-3-1          | Viruses dsDNA viruses, no RNA stage Caudovirales Podoviridae <i>Burkholderia phage</i> BcepC6B                                                   |
| Bph-4-1          | Viruses dsDNA viruses, no RNA stage Caudovirales Siphoviridae <i>Burkholderia phage</i> BcepGomr                                                 |
| Pph-1-1          | Viruses dsDNA viruses, no RNA stage Caudovirales Siphoviridae Lambda-like viruses unclassified Lambda-like viruses <i>Pseudomonas phage</i> DMS3 |
| Pph-2-1          | Viruses dsDNA viruses, no RNA stage Caudovirales Siphoviridae Lambda-like viruses unclassified Lambda-like viruses <i>Pseudomonas phage</i> MP22 |
| Pph-3-1          | Viruses dsDNA viruses, no RNA stage Caudovirales Siphoviridae Lambda-like viruses unclassified Lambda-like viruses <i>Pseudomonas phage</i> MP29 |
| Pph-4-1          | Viruses dsDNA viruses, no RNA stage Caudovirales Siphoviridae Lambda-like viruses unclassified Lambda-like viruses <i>Pseudomonas phage</i> MP38 |
| Pph-5-1          | Viruses dsDNA viruses, no RNA stage Caudovirales Siphoviridae <i>Pseudomonas phage</i> D3112                                                     |
| Xph-1-1          | Viruses dsDNA viruses, no RNA stage Caudovirales <i>Xanthomonas phage</i> Xp15                                                                   |
| Hph-1-1          | Viruses unclassified archaeal viruses Haloviruses <i>Halorubrum phage</i> HF2                                                                    |
| env-1 to env-179 | environmental samples                                                                                                                            |

### 3.2 Nucleotide coordinates

Each type II hammerhead ribozyme (indicated by “RNA→”) is listed. The accession number of the sequence containing each type II hammerhead ribozyme is given. Accessions beginning with “NC\_” or “NZ\_” are RefSeq, while other accession refer to environmental samples. Nucleotide coordinates are given for the 5′ and 3′ boundaries

of each. If the 5′ coordinate is greater than the 3′ coordinate, the RNA is present on the reverse-complement strand of the containing genomic DNA sequence. Each hit is denoted by an abbreviation (like “Eco-1-1”) that refers to a taxonomy given in Section 3.1.

| abbrev.  | Seq. accession |   | 5′ at     | 3′ at     |
|----------|----------------|---|-----------|-----------|
| Aae-1-1  | NW_001811757.1 | + | 105701    | 105773    |
| Rno-1-1  | NW_047393.2    | + | 6174401   | 6174483   |
| Rno-1-2  | NW_001084682.1 | + | 8753500   | 8753582   |
| Rno-1-3  | AC_000081.1    | + | 37658923  | 37659005  |
| Rno-1-4  | NC_005112.2    | + | 38954079  | 38954161  |
| Mmu-1-1  | NW_001121212.1 | + | 7986699   | 7986809   |
| Mmu-1-2  | NC_007864.1    | + | 141611424 | 141611534 |
| Ptr-1-1  | NW_001224605.1 | + | 8291874   | 8291984   |
| Ptr-1-2  | NC_006481.2    | + | 78246264  | 78246374  |
| Hsa-1-1  | NT_026437.12   | + | 59890892  | 59891002  |
| Hsa-1-2  | NW_001838113.2 | - | 16852173  | 16852063  |
| Hsa-1-3  | NC_000014.8    | + | 78890892  | 78891002  |
| Hsa-1-4  | AC_000057.1    | + | 58928650  | 58928760  |
| Hsa-1-5  | AC_000146.1    | + | 59056369  | 59056479  |
| Hsa-1-6  | NW_925561.1    | + | 25683180  | 25683290  |
| Hsa-1-7  | NT_026437.12   | - | 38607142  | 38607072  |
| Hsa-1-8  | NW_001838111.1 | - | 16472931  | 16472861  |
| Hsa-1-9  | NC_000014.8    | - | 57607142  | 57607072  |
| Hsa-1-10 | AC_000057.1    | - | 37657226  | 37657156  |
| Hsa-1-11 | AC_000146.1    | - | 37771941  | 37771871  |
| Hsa-1-12 | NW_925561.1    | - | 4411756   | 4411686   |
| Eca-1-1  | NW_001867381.1 | + | 59489193  | 59489278  |
| Eca-1-2  | NC_009159.2    | + | 82826250  | 82826335  |
| Clu-1-1  | NW_876276.1    | + | 30181637  | 30181722  |
| Clu-1-2  | NC_006605.2    | + | 33181637  | 33181722  |
| Bta-1-1  | NW_001493152.2 | + | 550149    | 550225    |
| Bta-1-2  | NC_007311.3    | + | 57537889  | 57537965  |
| Nve-1-1  | NW_001832983.1 | - | 13038     | 12945     |



|         |                         |   |          |          |
|---------|-------------------------|---|----------|----------|
| env-1   | JCVL_SCAF_1096627652015 | - | 1454     | 1368     |
| Yli-1-1 | NC_006069.1             | + | 3159387  | 3159451  |
| Gga-1-1 | NW_001471512.1          | - | 19095281 | 19095210 |
| Gga-1-2 | NC_006088.2             | - | 40826889 | 40826818 |
| Gga-1-3 | NW_001471740.1          | - | 10177919 | 10177823 |
| Gga-1-4 | NC_006095.2             | - | 21907719 | 21907623 |
| env-2   | JCVL_SCAF_1101668327004 | + | 628      | 708      |
| Xph-1-1 | NC_007024.1             | - | 464      | 382      |
| env-3   | JCVL_SCAF_1101668298932 | - | 574      | 494      |
| env-4   | JCVL_SCAF_1101668234969 | + | 943      | 1027     |
| env-5   | NCBL_READ_1113315959814 | + | 242      | 326      |
| env-6   | JCVL_SCAF_1101668016956 | + | 861      | 936      |
| Aae-1-2 | NW_001811050.1          | - | 426553   | 426480   |
| env-7   | NCBL_READ_1113289348185 | + | 559      | 634      |
| Gga-1-5 | NW_001471531.1          | + | 1507517  | 1507587  |
| Gga-1-6 | NC_006088.2             | + | 96269681 | 96269751 |
| env-8   | orpgwFw301.FCAY15930_y2 | + | 306      | 374      |
| env-9   | NCBL_READ_1112075888816 | + | 369      | 442      |
| env-10  | JCVL_SCAF_1096627676039 | + | 1216     | 1321     |
| env-11  | NCBL_READ_1113315940487 | - | 906      | 832      |
| env-12  | NCBL_READ_1113315940487 | - | 337      | 262      |
| env-13  | NCBL_READ_1112309193747 | - | 183      | 108      |
| Bph-4-1 | NC_009447.1             | - | 43947    | 43860    |
| Bph-1-1 | NC_005886.2             | + | 46632    | 46720    |
| Bam-1-1 | NC_009015.1             | + | 5567     | 5660     |
| env-14  | JCVL_SCAF_1096626145985 | + | 322      | 401      |
| env-15  | JCVL_SCAF_1101668631473 | - | 1210     | 1131     |
| env-16  | JCVL_SCAF_1096627477614 | + | 450      | 525      |
| env-17  | lwComb_BCHA8434_y1      | + | 427      | 516      |
| env-18  | orpgwFw301.FCAY80046_x1 | + | 144      | 216      |
| env-19  | NCBL_READ_1112308300939 | + | 701      | 767      |
| env-20  | JCVL_SCAF_1096627425624 | + | 996      | 1072     |
| env-21  | NCBL_READ_1113264279377 | + | 331      | 408      |
| env-22  | JCVL_SCAF_1096627350665 | + | 810      | 887      |
| env-23  | orpgwFw301.FCAY80046_x1 | + | 711      | 787      |
| env-24  | lwComb_BCGO38329_x1     | - | 459      | 365      |
| Mva-1-1 | NC_008726.1             | + | 2184321  | 2184398  |
| Ssp-1-1 | NZ_GG657748.1           | + | 287382   | 287459   |
| Ssp-1-2 | NZ_ACEV01000097.1       | + | 7817     | 7894     |
| env-25  | JCVL_SCAF_1096627490962 | - | 128      | 54       |
| env-26  | JCVL_SCAF_1096627150294 | - | 1129     | 1047     |
| env-27  | JCVL_SCAF_1101668252345 | + | 63       | 132      |
| env-28  | JCVL_SCAF_1096628385377 | + | 979      | 1059     |
| env-29  | lwComb_BCIB30239_g1     | + | 249      | 321      |
| env-30  | NCBL_READ_1113288952428 | - | 795      | 723      |
| env-31  | JCVL_SCAF_1101668524489 | + | 126      | 211      |
| env-32  | JCVL_SCAF_1096627793817 | - | 1302     | 1217     |
| env-33  | JCVL_SCAF_1096627793817 | - | 921      | 834      |
| env-34  | JCVL_SCAF_1101668524489 | + | 631      | 718      |
| env-35  | JCVL_SCAF_1096628385377 | + | 614      | 686      |
| env-36  | NCBL_READ_1113316485408 | - | 435      | 368      |
| env-37  | JCVL_SCAF_1096627756962 | - | 815      | 737      |

|         |                         |   |         |         |
|---------|-------------------------|---|---------|---------|
| env-38  | BAAZ01001912.1          | + | 1697    | 1773    |
| env-39  | ABDH01030091.1          | - | 760     | 673     |
| env-40  | orpgwFw301.FCAY33408.g1 | + | 599     | 672     |
| Str-1-1 | NC_009380.1             | + | 624655  | 624727  |
| Atu-1-1 | NC_003062.2             | + | 1183811 | 1183887 |
| env-41  | NCBI_READ_1112308529236 | + | 648     | 728     |
| Msp-1-1 | NZ.CH672429.1           | + | 654539  | 654610  |
| Msp-1-2 | NZ.AANE01000001.1       | + | 107461  | 107532  |
| env-42  | JCVI_SCAF_1096626860146 | + | 347     | 423     |
| env-43  | NCBI_READ_1113298044136 | + | 575     | 651     |
| env-44  | JCVI_SCAF_1096627886138 | + | 420     | 492     |
| env-45  | BAAV01035666.1          | - | 475     | 403     |
| env-46  | lwComb_BCGO17944.x1     | - | 505     | 434     |
| env-47  | NCBI_READ_1113264385967 | + | 686     | 757     |
| env-48  | NCBI_READ_1113264385967 | + | 285     | 363     |
| env-49  | NCBI_READ_1112308507689 | + | 797     | 872     |
| env-50  | lwComb_BCHA39123.y1     | + | 213     | 281     |
| Bok-1-1 | NZ.ABBF01000487.1       | + | 57647   | 57722   |
| env-51  | 84508229                | - | 677     | 607     |
| env-52  | JCVI_SCAF_1101668195326 | - | 840     | 728     |
| Gsp-1-1 | NZ.ABRG01000001.1       | - | 576148  | 576078  |
| env-53  | JCVI_SCAF_1101668645913 | - | 85      | 10      |
| CSo-1-1 | NC_008536.1             | - | 7550346 | 7550269 |
| Aba-1-1 | NC_010400.1             | + | 1743598 | 1743674 |
| env-54  | orpgwFw301.FCAY80046.x1 | + | 584     | 657     |
| env-55  | JCVI_SCAF_1101668043534 | - | 374     | 303     |
| env-56  | JCVI_SCAF_1101668043534 | - | 962     | 891     |
| env-57  | JCVI_SCAF_1096626868593 | - | 854     | 783     |
| env-58  | JCVI_SCAF_1096627675837 | + | 1615    | 1687    |
| env-59  | NCBI_READ_1112308263239 | + | 739     | 818     |
| env-60  | NCBI_READ_1112308332586 | + | 104     | 184     |
| env-61  | NCBI_READ_1113316054703 | + | 702     | 782     |
| env-62  | NCBI_READ_1113264407631 | + | 110     | 190     |
| Hph-1-1 | NC_003345.1             | + | 10284   | 10363   |
| env-63  | JCVI_SCAF_1101668023555 | - | 645     | 566     |
| Bph-3-1 | NC_005887.1             | - | 37717   | 37626   |
| env-64  | JCVI_SCAF_1096626613328 | + | 403     | 470     |
| env-65  | JCVI_SCAF_1101668069951 | - | 115     | 39      |
| env-66  | JCVI_SCAF_1101668640120 | + | 15      | 88      |
| env-67  | BAAY01000056.1          | + | 99      | 176     |
| Dac-1-1 | NZ.AAEW02000007.1       | - | 212202  | 212114  |
| env-68  | hgutS8_s8_162642        | + | 1108    | 1195    |
| Eve-1-1 | NZ_DS264268.1           | - | 44317   | 44230   |
| Eve-1-2 | NZ.AAVL02000026.1       | - | 44317   | 44230   |
| Rob-1-1 | NZ_DS264303.1           | - | 52266   | 52190   |
| Rob-1-2 | NZ.AAVO02000006.1       | - | 52266   | 52190   |
| Csc-1-1 | NZ_DS499683.1           | + | 30847   | 30928   |
| Csc-1-2 | NZ.ABFY02000014.1       | + | 29803   | 29884   |
| env-69  | BABB01000355.1          | + | 3788    | 3869    |
| Rgn-1-1 | NZ.AAYG02000002.1       | + | 57690   | 57767   |
| env-70  | JCVI_SCAF_1096627136860 | - | 1038    | 961     |
| env-71  | JCVI_SCAF_1096627953587 | + | 628     | 705     |

|         |                         |   |         |         |
|---------|-------------------------|---|---------|---------|
| env-72  | JCVL_SCAF_1101668618652 | + | 798     | 876     |
| env-73  | JCVL_SCAF_1096627149988 | - | 2426    | 2348    |
| env-74  | JCVL_SCAF_1096627355377 | + | 1728    | 1806    |
| env-75  | JCVL_SCAF_1096627133113 | - | 2309    | 2232    |
| Bbr-1-1 | NC_012491.1             | - | 3758994 | 3758916 |
| env-76  | NCBI_READ_1113298036116 | + | 128     | 204     |
| env-77  | NCBI_READ_1113316372099 | + | 187     | 263     |
| env-78  | NCBI_READ_1113298221022 | - | 108     | 35      |
| Aco-1-1 | NZ_DS544175.1           | + | 247273  | 247348  |
| Aco-1-2 | NZ_ABGD02000005.1       | + | 247273  | 247348  |
| env-79  | NCBI_READ_1113264407631 | + | 472     | 544     |
| env-80  | NCBI_READ_1113297962692 | + | 266     | 338     |
| env-81  | NCBI_READ_1113212712369 | + | 344     | 416     |
| env-82  | NCBI_READ_1113288743565 | + | 111     | 183     |
| Atu-1-2 | NC_003062.2             | + | 1182386 | 1182461 |
| Atu-1-3 | NC_003062.2             | + | 1183317 | 1183401 |
| Rsp-1-1 | NZ_AAYC01000006.1       | + | 45585   | 45666   |
| env-83  | NCBI_READ_1113235649418 | + | 766     | 840     |
| env-84  | NCBI_READ_1113297588229 | + | 795     | 874     |
| env-85  | NCBI_READ_1113288743565 | + | 597     | 678     |
| env-86  | NCBI_READ_1113101985482 | + | 203     | 284     |
| env-87  | NCBI_READ_1112309187087 | + | 483     | 564     |
| env-88  | NCBI_READ_1113216249451 | + | 122     | 203     |
| env-89  | NCBI_READ_1112328278085 | + | 386     | 467     |
| env-90  | NCBI_READ_1113298044136 | + | 63      | 144     |
| env-91  | JCVL_SCAF_1101668021616 | - | 811     | 741     |
| Bth-3-1 | NZ_CM000749.1           | + | 5771536 | 5771608 |
| Bth-3-2 | NZ_ACNB01000382.1       | + | 13492   | 13564   |
| Bce-4-1 | NZ_ABDL02000010.1       | + | 22839   | 22911   |
| Bce-1-1 | NC_004722.1             | - | 2632914 | 2632842 |
| Bce-3-1 | NZ_CM000723.1           | + | 2403996 | 2404068 |
| Bce-2-1 | NZ_CM000726.1           | + | 2436198 | 2436270 |
| Bce-3-2 | NZ_ACMB01000055.1       | - | 11722   | 11650   |
| Bce-2-2 | NZ_ACME01000052.1       | - | 15525   | 15453   |
| Bth-1-1 | NZ_CM000759.1           | + | 2355225 | 2355297 |
| Bth-2-1 | NZ_AAJM01000263.1       | + | 4754    | 4826    |
| Bth-1-2 | NZ_ACNL01000084.1       | - | 894     | 822     |
| env-92  | hsmat09_BHWY2656_y1     | - | 396     | 324     |
| env-93  | JCVL_SCAF_1101668476676 | + | 539     | 624     |
| Ssp-2-1 | NC_008750.1             | + | 3364852 | 3364931 |
| Sba-2-1 | NC_009997.1             | + | 2533008 | 2533088 |
| Sba-1-1 | NC_009665.1             | + | 2487663 | 2487743 |
| Son-1-1 | NC_004347.1             | + | 675643  | 675722  |
| env-94  | JCVL_SCAF_1096628047958 | - | 608     | 529     |
| Spu-1-1 | NZ_AAWY01000003.1       | - | 221646  | 221567  |
| Spu-1-2 | NZ_AAWY01000003.1       | - | 193     | 114     |
| Spu-1-3 | NZ_AAWY01000003.1       | - | 949     | 870     |
| Msp-1-3 | NZ_CH672432.1           | + | 440861  | 440933  |
| Msp-1-4 | NZ_AAANE01000004.1      | + | 149735  | 149807  |
| Bbr-2-1 | NC_002927.3             | + | 3868282 | 3868353 |
| env-95  | BABA01024777.1          | - | 261     | 184     |
| env-96  | BAAV01027012.1          | - | 588     | 510     |

|         |                         |   |         |         |
|---------|-------------------------|---|---------|---------|
| env-97  | JCVI_SCAF_1096627561946 | + | 475     | 561     |
| env-98  | JCVI_SCAF_1096627561946 | + | 1208    | 1314    |
| env-99  | NCBI_READ_1113101824897 | + | 770     | 840     |
| env-100 | JCVI_SCAF_1101668632829 | - | 87      | 9       |
| Csc-1-3 | NZ_ABFY02000014.1       | + | 30371   | 30447   |
| Sva-1-1 | NZ_GG657711.1           | + | 267419  | 267495  |
| Sva-1-2 | NZ_ACBY01000013.1       | + | 25420   | 25496   |
| env-101 | BAAV01017309.1          | + | 433     | 510     |
| env-102 | BAAV01026106.1          | + | 371     | 448     |
| Rob-1-3 | NZ_DS264311.1           | + | 65679   | 65754   |
| Rob-1-4 | NZ_AAVO02000003.1       | + | 65679   | 65754   |
| env-103 | NCBI_READ_1113288730604 | + | 39      | 112     |
| Sva-1-3 | NZ_GG657711.1           | + | 266491  | 266565  |
| Sva-1-4 | NZ_ACBY01000013.1       | + | 24492   | 24566   |
| env-104 | BAAU01015770.1          | + | 221     | 296     |
| env-105 | BAAZ01026319.1          | + | 540     | 615     |
| env-106 | BABA01016509.1          | - | 149     | 74      |
| Rfl-1-1 | NZ_ACOK01000116.1       | + | 68744   | 68817   |
| Rfl-1-2 | NZ_ACOK01000093.1       | + | 25000   | 25072   |
| Aco-1-3 | NZ_DS544175.1           | + | 247861  | 247937  |
| Aco-1-4 | NZ_ABGD02000005.1       | + | 247861  | 247937  |
| Vch-5-1 | NZ_ACHY01000016.1       | + | 821308  | 821386  |
| Vch-3-1 | NC_012582.1             | + | 1228174 | 1228252 |
| Vch-3-2 | NC_012582.1             | - | 1323393 | 1323315 |
| Vch-3-3 | NC_009457.1             | + | 696755  | 696833  |
| Vch-3-4 | NC_009457.1             | - | 791974  | 791896  |
| Vch-2-1 | NZ_AAUT01000030.1       | - | 27566   | 27488   |
| Vch-1-1 | NZ_ACFQ01000009.1       | + | 947084  | 947162  |
| Vch-4-1 | NZ_ACHW01000026.1       | + | 444532  | 444610  |
| Vch-6-1 | NZ_DS179724.1           | + | 24734   | 24812   |
| Son-1-2 | NC_004347.1             | + | 2795544 | 2795628 |
| env-107 | JCVI_SCAF_1101668623960 | - | 1430    | 1358    |
| env-108 | JCVI_SCAF_1096627134326 | + | 489     | 561     |
| env-109 | NCBI_READ_1113288561381 | - | 492     | 423     |
| env-110 | JCVI_SCAF_1096627183901 | + | 1841    | 1918    |
| env-111 | BAAX01009122.1          | - | 836     | 765     |
| env-112 | NCBI_READ_1113298030426 | + | 382     | 457     |
| env-113 | NCBI_READ_1113216252740 | + | 603     | 678     |
| env-114 | NCBI_READ_1113216236859 | + | 501     | 575     |
| env-115 | NCBI_READ_1112308332586 | + | 772     | 846     |
| env-116 | NCBI_READ_1113297588229 | + | 463     | 537     |
| env-117 | NCBI_READ_1112309187087 | + | 151     | 225     |
| env-118 | NCBI_READ_1112328294934 | + | 570     | 644     |
| env-119 | NCBI_READ_1112328278085 | + | 54      | 128     |
| Tau-1-1 | NC_012691.1             | + | 802633  | 802705  |
| env-120 | BAAV01002121.1          | - | 1382    | 1309    |
| Fpr-1-1 | NZ_GG697157.2           | + | 78589   | 78662   |
| Fpr-1-2 | NZ_ACOP02000091.1       | + | 48319   | 48392   |
| env-121 | BAAZ01008149.1          | - | 696     | 623     |
| env-122 | BABD01007247.1          | + | 109     | 184     |
| env-123 | BAAU01013201.1          | + | 326     | 401     |
| env-124 | JCVI_SCAF_1101668643875 | - | 551     | 479     |

|         |                         |   |         |         |
|---------|-------------------------|---|---------|---------|
| env-125 | JCVL_SCAF_1101668603430 | + | 460     | 532     |
| env-126 | orpgwFw301.FCAY35373.g1 | + | 40      | 123     |
| env-127 | BAAU01013336.1          | + | 1025    | 1098    |
| env-128 | orpgwFw301.FCAY67857.g1 | - | 675     | 593     |
| Cvi-1-1 | NC_005085.1             | + | 2338129 | 2338211 |
| Dde-1-1 | NC_007519.1             | + | 3331682 | 3331765 |
| Dvu-3-1 | NC_002937.3             | + | 2806274 | 2806351 |
| Dvu-1-1 | NZ_ACQX01000047.1       | + | 348     | 425     |
| Dpi-1-1 | NZ_DS996355.1           | - | 282625  | 282552  |
| Dpi-1-2 | NZ_ABXU01000029.1       | - | 19980   | 19907   |
| Dvu-3-2 | NC_002937.3             | + | 2805961 | 2806036 |
| Dvu-1-2 | NZ_ACQX01000047.1       | + | 35      | 110     |
| Dvu-3-3 | NC_002937.3             | - | 1233052 | 1232976 |
| Dvu-1-3 | NZ_ACQX01000002.1       | - | 139573  | 139497  |
| Dvu-2-1 | NC_011769.1             | + | 870228  | 870306  |
| Dma-1-1 | NC_012796.1             | + | 1604562 | 1604635 |
| env-129 | BAAU01002630.1          | - | 1442    | 1368    |
| Dpi-1-3 | NZ_DS996364.1           | + | 597     | 669     |
| Dpi-1-4 | NZ_ABXU01000094.1       | + | 597     | 669     |
| Dpi-1-5 | NZ_DS996365.1           | + | 787     | 861     |
| Dpi-1-6 | NZ_ABXU01000095.1       | + | 787     | 861     |
| Bbr-2-2 | NC_002927.3             | + | 3867829 | 3867901 |
| Bps-2-1 | NZ_ABBI01002348.1       | + | 68      | 143     |
| Bps-1-1 | NZ_ABBO01000909.1       | + | 30747   | 30822   |
| Bce-5-1 | NC_011000.1             | - | 1750826 | 1750751 |
| Bph-2-1 | NC_011216.1             | + | 15726   | 15801   |
| Tsp-1-1 | NC_011901.1             | - | 1761148 | 1761072 |
| Rso-1-1 | NW_002196569.1          | - | 2359831 | 2359757 |
| Rso-2-1 | NZ_AAKL01000024.1       | + | 52470   | 52544   |
| Tau-1-2 | NC_012691.1             | + | 800758  | 800832  |
| env-130 | orpgwFw301.C2828        | - | 347     | 269     |
| Pph-3-1 | NC_011613.1             | + | 8799    | 8878    |
| Pph-5-1 | NC_005178.1             | + | 9433    | 9512    |
| Pph-1-1 | NC_008717.1             | + | 8944    | 9023    |
| Pph-2-1 | NC_009818.1             | + | 8309    | 8388    |
| Pae-1-1 | NC_011770.1             | + | 1691943 | 1692022 |
| Pph-4-1 | NC_011611.1             | + | 9441    | 9520    |
| env-131 | JCVL_SCAF_1096627142888 | + | 5804    | 5875    |
| env-132 | contig38646             | - | 295     | 222     |
| env-133 | NCBLREAD_1113263904375  | + | 605     | 672     |
| env-134 | JCVL_SCAF_1101668476676 | + | 866     | 936     |
| env-135 | JCVL_SCAF_1096627134326 | + | 154     | 226     |
| env-136 | JCVL_SCAF_1096627807840 | - | 271     | 198     |
| env-137 | JCVL_SCAF_1101668613381 | - | 328     | 258     |
| env-138 | JCVL_SCAF_1101668504555 | - | 490     | 414     |
| env-139 | JCVL_SCAF_1096626965523 | - | 296     | 223     |
| env-140 | JCVL_SCAF_1096627549721 | - | 1354    | 1281    |
| env-141 | JCVL_SCAF_1096627520246 | + | 297     | 370     |
| env-142 | JCVL_SCAF_1096627541075 | + | 1291    | 1365    |
| env-143 | JCVL_SCAF_1096627003344 | + | 2033    | 2105    |
| env-144 | JCVL_SCAF_1096626998765 | + | 770     | 844     |
| env-145 | JCVL_SCAF_1096627718203 | + | 65      | 139     |

|         |                              |   |        |        |
|---------|------------------------------|---|--------|--------|
| env-146 | JCVL_SCAF_1101668300237      | + | 849    | 923    |
| env-147 | JCVL_SCAF_1096627546437      | + | 1852   | 1926   |
| env-148 | JCVL_SCAF_1096627737419      | + | 1618   | 1690   |
| env-149 | JCVL_SCAF_1096627568858      | + | 1484   | 1559   |
| env-150 | JCVL_SCAF_1101668234889      | - | 442    | 367    |
| env-151 | JCVL_SCAF_1096626963864      | + | 2138   | 2213   |
| env-152 | JCVL_SCAF_1096627056929      | - | 3117   | 3042   |
| Cas-1-1 | NZ_GG657595.1                | - | 128956 | 128883 |
| Cas-1-2 | NZ_ACCJ01000537.1            | - | 1397   | 1324   |
| env-153 | JCVL_SCAF_1096627425624      | + | 1465   | 1539   |
| env-154 | BABA01005743.1               | - | 642    | 566    |
| env-155 | BAAY01000056.1               | + | 386    | 459    |
| env-156 | NCBI_BBAY_READ_1108383310056 | + | 115    | 223    |
| env-157 | JCVL_SCAF_1101668612919      | + | 428    | 510    |
| env-158 | orpgwFw301.FCAY33408.g1      | + | 265    | 341    |
| env-159 | JCVL_SCAF_1101667320724      | - | 276    | 204    |
| env-160 | JCVL_SCAF_1101668649815      | - | 242    | 169    |
| env-161 | NCBI_READ_1113264373433      | - | 604    | 531    |
| env-162 | JCVL_SCAF_1101668604418      | - | 704    | 629    |
| env-163 | JCVL_SCAF_1096627138861      | - | 1194   | 1119   |
| env-164 | JCVL_SCAF_1096628332211      | + | 635    | 702    |
| env-165 | JCVL_SCAF_1096626628190      | + | 781    | 855    |
| env-166 | NCBI_READ_1112308859153      | + | 866    | 934    |
| env-167 | JCVL_SCAF_1096627408878      | - | 553    | 481    |
| env-168 | JCVL_SCAF_1096627390721      | + | 635    | 707    |
| env-169 | JCVL_SCAF_1096627391036      | - | 315    | 243    |
| env-170 | NCBI_READ_1112328318674      | + | 651    | 726    |
| env-171 | NCBI_READ_1112309176337      | + | 642    | 717    |
| env-172 | NCBI_READ_1113288922532      | + | 321    | 396    |
| env-173 | NCBI_READ_1112308466201      | + | 368    | 443    |
| env-174 | NCBI_READ_1112308867769      | + | 472    | 547    |
| env-175 | NCBI_READ_1113264327959      | + | 64     | 139    |
| Bok-1-2 | NZ_ABBF01000487.1            | + | 57964  | 58051  |
| Bmu-1-1 | NC_010086.1                  | - | 817936 | 817849 |
| Bok-1-3 | NZ_ABBF01000487.1            | + | 58753  | 58821  |
| env-176 | JCVL_SCAF_1096627931451      | + | 207    | 274    |
| env-177 | lwComb_lwCombC20730          | - | 431    | 359    |
| env-178 | orpgwFw301.FCAY88936.b1      | + | 282    | 351    |
| env-179 | hsmat06_BHWP8060.y1          | + | 230    | 308    |

Duplicate sequences: the following putative homologs are not shown in the alignment because their sequences are identical to a homolog already shown: Aco-1-2, Aco-1-4, Bce-2-1, Bce-2-2, Bce-3-1, Bce-3-2, Bph-2-1, Bta-1-2, Bth-1-2, Bth-2-1, Bth-3-2, Cas-1-2, Clu-1-2, Csc-1-2, Dpi-1-2, Dpi-1-4, Dpi-1-6, Dvu-1-1, Dvu-1-2, Dvu-1-3, Eca-1-2, Eve-1-2, Fpr-1-2, Gga-1-2, Gga-1-4, Gga-1-6, Hsa-1-10, Hsa-1-11, Hsa-1-12, Hsa-1-2, Hsa-1-3, Hsa-1-4, Hsa-1-5, Hsa-1-6, Hsa-1-8, Hsa-1-9, Mmu-1-2, Msp-1-2, Msp-1-4, Pph-2-1, Ptr-1-2, Rno-1-2, Rno-1-3, Rno-1-4, Rob-1-2, Rob-1-4, Rso-2-1, Spu-1-2, Ssp-1-2, Sva-1-2, Sva-1-4, Vch-1-1, Vch-2-1, Vch-3-2, Vch-3-3, Vch-3-4, Vch-4-1, env-117, env-118, env-119, env-121, env-13, env-146, env-151, env-152, env-173, env-174, env-61, env-73, env-74, env-77, env-80, env-81, env-82, env-87, env-88, env-89

### 3.3 Multiple-sequence alignment













Aae-1-2 .CAUGUA..CUGA.UGA.GUUU...UAUCA.CUUCGA  
 env-7 .GGUAAA..CUGA.UGA.GACU..UCAAAGG.AAUUAA  
 Gga-1-5 UUCGAGG..CUGA.AGA.AG.....CC.CAAUUC  
 env-8 .GGCGCG..CUGA.CGA.GGC.....UGGA.GAGGAG  
 env-9 .CCUAGC..CUGA.UGA.GGUU.....AGCA.CCUUAA  
 env-10 CCGAGUG..CUGA.CGACGACC.....GACC.CGUGGC  
 env-11 CUAUGGC..CUGA.UGAUGGG.....AAAC.UACGUC  
 env-12 CUAUGGC..CUGA.UGAUGGG.....AAAC.UACGUC  
 Bph-4-1 ..UGCGC..CUGA.CGAUGGCC..GUCAGAA.UCAUUG  
 Bph-1-1 .CGCUGC..CUGA.CGAUGGCC..GUCAGAA.UCACGG  
 Bam-1-1 .CGCUGC..CUGA.CGAUGGCC..GUCAACU.UUAUCG  
 env-14 UGGCCAC..CUGA.UGAUGA.....AAGUC.AUCGGC  
 env-15 CCCCGU..CUGA.UGAUGGC.....AGAC.ACUAUC  
 env-16 UGUAAAG..CUGA.UGA.GUCA.....AACC.AAAUGA  
 env-17 UGAGAAU..CUGA.UGAUGGC.....AGGC.CAUAGU  
 env-18 .CGUACC..CUGA.UGA.GACC.....AUUC.UCUCAC  
 env-19 CCCGUAC..CUGA.UGA.GG.....AUUU.UACCAU  
 env-20 CUGACUG..CUGA.UGA.GGC.....AGGU.UAACAA  
 env-21 .GUGCCG..CUGA.GGA.GUCC.UUUC..CCAGUCAA  
 env-22 GCCCUAG..CUGA.UGA.GUC.....UGCC.AAUUGU  
 env-23 .CACUGC..CUGA.CGA.GGUC.....AACC.CACAAU  
 env-24 UGCCGCA..CUGA.CGAGGACC.GAUCAGCG.CGACGA  
 Mva-1-1 UCUCAGG..CUGA.UGAUGGC.....UGCC.GCAGUG  
 Ssp-1-1 ..CCGGG..CUGA.CGAUGGCC..CCAGAG.AAAGGA  
 env-25 GGGCAUA..CUGA.UGA.G.....ACCC.AAAAGA  
 env-26 CGCUUGU..CUGA.UGA.GCC.....AGUC.AGCUUG  
 env-27 .CUACAC..CUGA.UGA.GGCU.....AGGG.GUACUA  
 env-28 CCAAUAU..CUGA.UGA.GUC.....AGCU.ACUCAA  
 env-29 .CGGUGC..CUGA.AGA.GAUC..ACAAACA.CAUCAA  
 env-30 ACUUAUG..CUGA.UGA.GAC.....AGAU.UAUAAC  
 env-31 UAAAUAU..CUGA.UGAUGGC.....AGAC.ACUAUC  
 env-32 UAAAUAU..CUGA.CGAUGGC.....AGAC.ACUAUC  
 env-33 CUAUAUA..CUGA.UGAUGGC.....AGAC.CCAUUA  
 env-34 CUAUAUA..CUGA.UGAUGGC.....AGAC.CCAUUU  
 env-35 AUAGCUA..CUGA.UGAUGGC.....AGUC.GCAUUA  
 env-36 .CCCGUC..CUGA.UGA.GUC.....UAUA.GAAAGA  
 env-37 GGAUGUA..CUGA.CGA.GAC.....AGUU.UCUCGA  
 env-38 C.CGGUG..CUGA.CGAUGG.....AAGAC.CAGAAA  
 env-39 CGGGGAG..CUGA.CGA.GCU.....AGCC.AAAGGA  
 env-40 GUCGGAC..CUGA.CGA.GGC.....UGCC.AUACCA  
 Str-1-1 UCCGCUC..CUGA.UGAUGGC.....UGCC.GAUAGG  
 Atu-1-1 GCCCGGC..CUGA.UGAUGGU.....UGCC.AUUCCC  
 env-41 .CCAGCA..CUGA.CGA.GCC.....CAUCC.CCAAGG  
 Msp-1-1 CUUGAGA..CUGA.UGAUGAC.....AGGC.UAUUUU  
 env-42 CUACCUA..CUGA.AGA.GA.....CAGCU.UAAAAA  
 env-43 AGCGUCA..CUGA.UGA.GA.....CAGCU.CACUGA  
 env-44 ACCCGUA..CUGA.UGA.GACU.....GGCU.A.ACAA  
 env-45 CCUGCAU..CUGA.UGA.GG.....ACAGGC.UGAAAA  
 env-46 .CGUCCA..CUGA.AGA.GCGC.....AACC.CCUAAC  
 env-47 .GCCGUG..CUGA.UGA.GUCC.CAUAACC.A.ACAG  
 env-48 .GCCGUG..CUGA.UGA.GUCC.CAUAACC.ACACAA  
 env-49 .GGCGUG..CUGA.UGA.GUCC.CAUAACC.ACAGAA  
 env-50 .CGCACA..CUGA.CGA.GACC..AACACCU.CACAGC  
 env-51 .CGUGCG..CUGA.UGA.GUCC..ACCAAGG.GAAAGA  
 env-52 .CCCGCA..CUGA.UGA.GUCC..AAGAGGA.GAAACC  
 Gsp-1-1 UCCUAUA..CUGA.GGA.GAU.....AGGC.UACCUA  
 env-53 CCUGACG..CUGA.UGAUGGC.....AUGC.CGAUCA  
 CSo-1-1 CCACGC..CUGA.AGA.GAC.....AGGC.CCAAGA  
 Aba-1-1 UCCAGUA..CUGA.UGA.GO.....AGCG.AUAGGG

>>>>>>.....>>>>.....  
 ?222222.....2222.....  
 .....>>>.>>>...  
 .....??? ???...  
 oY●●●●●-CUGA-YGA-G●o-----AG●Y-●●●●●

env-54 .CCACUG..CUGA.UGA.GGCC.....AGAA.CGCCUA  
 env-55 GACAUA..CUGA.UGA.GAU.....AGGU.CAAAGA  
 env-56 GUCCUAA..CUGA.UGA.GAU.....AGCU.CAAGAG  
 env-57 GUUCUAA..CUGA.UGA.GAU.....AGCU.CAAGAA  
 env-58 CUCCCGC..CUGA.UGA.GGC.....AAAC.GCCAAG  
 env-59 ACUGGCA..CUGA.UGA.GAC.....ACGC.GAAACU  
 env-60 CCUGGCA..CUGA.UGA.GAC.....ACGC.GAAACA  
 env-62 ACUGGCA..CUGA.UGA.GAC.....ACGC.GAAACA  
 Hph-1-1 UCCCGGCUGUUGA.CGA.GCGC.....ACCAGAC.ACC  
 env-63 CUACUGC..CUGA.CGAUGGC.....AGCU.GUAUCA  
 Bph-3-1 .CGCGCA..CUGA.CGA.GAUC..CGAAUUC.CGCCGC  
 env-64 .CUGUCA..CUGA.UGA.GACC.....AUCA.GCAA  
 env-65 CGGCCCG..CUGA.UGA.GAC.....AAGC.CACCGA  
 env-66 CCACGAU..CUGA.UGA.GAC.....AGGC.CUUAAU  
 env-67 CUGCGGC..CUGA.UGAUGGCA.....GGUC.AAAACA  
 Dac-1-1 CCCUGGU..CUGA.AGA.GC.....AGCC.AGAAGC  
 env-68 CUGUUUU..CUGA.CGAGGGC.....AAGCC.AAUAGC  
 Eve-1-1 CUGUUUU..CUGA.CGAGGGC.....AAGCC.AAUAGC  
 Rob-1-1 GUGAUCG..CUGA.CGAUGGC.....AAGC.UGAUAG  
 Csc-1-1 CGACGCU..CUGA.CGAUGGC.....AAGCC.GAAAGA  
 env-69 CGACACU..CUGA.CGAUGGC.....AAGCC.GAAAGA  
 Rgn-1-1 GUGUUCA..CUGA.UGAUGGC.....AAGCC.GAAAGA  
 env-70 CUGCUCU..CUGA.CGA.GAC.....AAGC.CACAAG  
 env-71 CUGCCC..CUGA.CGA.GAC.....AAGC.CACAAG  
 env-72 CUGCUCU..CUGA.CGA.GAC.....AAGCC.GCAAGA  
 env-75 CGCUACG..CUGA.UGA.GAC.....AAAC.CACAAA  
 Bbr-1-1 ACCGGCA..CUGA.UGA.GAC.....AGGU.UACAUA  
 env-76 CCCUGCA..CUGA.UGA.GAC.....AGGG.UUUUUU  
 env-78 CCCUGCA..CUGA.UGA.GAC.....AGGC.UACAUA  
 Aco-1-1 CCCGUA..CUGA.CGA.GGC.....AGGU.UGUAUG  
 env-79 AUGUGCA..CUGA.UGA.GAC.....AGCC.CGACAC  
 Atu-1-2 CUAGGGC..CUGA.UGA.GCU.....AGGC.GAAUAG  
 Atu-1-3 CUAGGGC..CUGA.UGA.GC.....AGCGACGAAA  
 Rsp-1-1 UCCCGAU..CUGA.UGA.GC.....AGCC.ACCACU  
 env-83 UCUGUCA..CUGA.UGA.GCC.....AGGU.CACCUA  
 env-84 UUUCCCG..CUGA.UGA.GAC.....AGCC.ACGAAU  
 env-85 UUUCCCG..CUGA.UGA.GAC.....AGGC.CACGAA  
 env-86 UUUCCCG..CUGA.UGA.GAC.....AGGC.CACGAA  
 env-90 UUUCCCG..CUGA.UGA.GAC.....AGGC.CACGAA  
 env-91 ACCGCUA..CUGA.CGA.GGC.....AGGC.GACAAG  
 Bth-3-1 CCUAUUG..CUGA.AGA.GAU.....AGGU.CAUUUA  
 Bce-4-1 CCUAUUG..CUGA.AGA.GAC.....AGGU.CAUUUA  
 Bce-1-1 CCUAUUG..CUGA.AGA.GAU.....AGGU.CGUUUU  
 Bth-1-1 CCUAUUG..CUGA.AGA.GAU.....AGGU.CAUUUA  
 env-92 CCCCGUG..CUGA.UGA.GAC.....AGGC.AAAACA  
 env-93 CCUUGCA..CUGA.CGA.GAC.....AGGC.UAUCAA  
 Ssp-2-1 CUUGCUA..CUGA.UGA.GC.....AGCU.AAGGAG  
 Sba-2-1 UUAGGCA..CUGA.UGA.GC.....AGCU.AACCAA  
 Sba-1-1 UUAGGCA..CUGA.UGA.GC.....AGCU.AACCAA  
 Son-1-1 UUAGGCA..CUGA.UGA.GC.....AGCU.AACCCA  
 env-94 CUAGGUA..CUGA.UGA.GC.....AGCU.AAGGAG  
 Spu-1-1 CUGGGUA..CUGA.UGA.GC.....AGCU.AACACA  
 Spu-1-3 CUGGGUA..CUGA.UGA.GC.....AGCU.AACACA  
 Msp-1-3 UUAGGUA..CUGA.UGA.GC.....AGCU.AAGGAG  
 Bbr-2-1 CUGGGUA..CUGA.UGA.GC.....AGCA.CCAACA  
 env-95 CCCGGCA..CUGA.UGA.GGC.....AGAC.CGGAAA  
 env-96 ACCGGCA..CUGA.UGAUGGC.....AGAC.CGGAAA  
 env-97 CCCGGCA..CUGA.UGAAGAC.....AGGU.CAAACU  
 env-98 CCCGGCA..CUGA.UGAAGAC.....AGGU.CAAUCU  
 env-99 CCCUGCG..CUGA.UGA.GC.....AGAU.GACUCA

>>>>>>.....>>>>.....  
 ?222222.....2222.....  
 .....>>>.>>>.....  
 .....??? ???.....  
 oY●●●●●-CUGA-YGA-G●o-----AG●Y-●●●●●

env-100 CCCGGUA . CUGA . UGA . GGC . . . . . AGGG . CGGAA  
Csc-1-3 CCACGCA . UUGA . CAA . GGC . . . . . AGGU . CAGAAC  
Sva-1-1 C . CAGCA . CUGA . GGAUGGC . . . . . AGGU . CGGAGU  
env-101 CCCGUGC . CUGA . UGAUGGC . . . . . AGGU . CGAAAA  
env-102 CCCGUGC . CUGA . UGAUGGC . . . . . AGGU . CUGAGG  
Rob-1-3 CCUGGUG . CUGA . UGAUGGU . . . . . AGGU . CAAUGC  
env-103 CCCGGCG . CUGA . UGAUGGC . . . . . AGGU . CACCGG  
Sva-1-3 CCCGGUA . CUGA . UGA . GGC . . . . . AGGC . CAAGAA  
env-104 CCCGGUA . CUGA . UGAUGGC . . . . . AGGC . CAAGGA  
env-105 CCCGGUA . CUGA . AGAUGGC . . . . . AGGC . CAAGGA  
env-106 CCCGGCA . CUGA . UGAUGGC . . . . . AGGU . UAAGAA  
Rfl-1-1 CCUGUUA . CUGA . UGAUGGC . . . . . AGGU . CAAAAA  
Rfl-1-2 ACCUGUA . CUGA . UGA . GAC . . . . . AGGU . CAGAAA  
Aco-1-3 CCCUGUA . CUGA . UGAUGGU . . . . . AGGU . CGAGGC  
Vch-5-1 CUAGGCA . CUGA . UGA . GC . . . . . AGCC . AAGGGA  
Vch-3-1 CUAGGCA . CUGA . UGA . GC . . . . . AGCC . AAGGGA  
Vch-6-1 CUAGGCA . CUGA . UGA . GC . . . . . AGCC . AGGGGA  
Son-1-2 CCGAGCA . CUGA . UGA . GC . . . . . AGCC . AAAGGA  
env-107 . CCCACA . CUGA . UGA . GAC . . . . . AGGG . CAACAA  
env-108 . CCCACA . CUGA . UGA . GAC . . . . . AGGG . CAACAA  
env-109 . CUUGCA . CUGA . UGA . GAU . . . . . AGGC . GAUAGA  
env-110 CCCGGUA . CUGA . UGA . GC . . . . . AACCC . AAACGA  
env-111 . UCCGGC . CUGA . CGA . GCAC . . . . . AAGC . AAGAAA  
env-112 CAUGUCA . CUGA . UGA . GACA . . . . . AGCC . AUUAAA  
env-113 CGCGUCA . CUGA . UGA . GAC . . . . . AGGC . CGACAC  
env-114 CGCGUCA . CUGA . UGA . GAC . . . . . AAGC . CGACAC  
env-115 CGCGUCA . CUGA . UGA . GAC . . . . . AGGC . CGACAC  
env-116 CGCGUCA . CUGA . UGA . GAC . . . . . AGGC . CGACAC  
Tau-1-1 UCGGGCA . CUGA . UGA . GC . . . . . AGCC . ACGGCC  
env-120 ACCGGC . CUGA . CGAUGGC . . . . . AGGG . CAGAAA  
Fpr-1-1 . CCCGGU . CUGA . AGAUGGC . . . . . AGGG . CAGAAA  
env-122 ACACAGU . CUGA . UGAUGGC . . . . . AGGU . CAGAAA  
env-123 ACACAGU . CUGA . UGAUGGC . . . . . AGGU . CAGAAA  
env-124 CCCGGCA . CUGA . UGAUGAC . . . . . AGGC . ACCAAC  
env-125 CCCGGCA . CUGA . UGA . GAC . . . . . AGGC . ACCAAC  
env-126 UCCGGC . CUGA . UGAUGC . . . . . AGCC . GGGAGG  
env-127 CCCGAUA . CUGA . CGA . GC . . . . . AGCC . AAUAAA  
env-128 CCCGGUA . CUGA . UGA . GC . . . . . AGCC . AACGAU  
Cvi-1-1 CCCGGUA . CUGA . UGA . GC . . . . . AGCC . AACGAU  
Dde-1-1 GUCGGAC . CUGA . UGA . GC . . . . . AGCC . AAGCUA  
Dvu-3-1 GCCGGG . CUGA . CGA . GC . . . . . AGCC . GAACAA  
Dpi-1-1 GCCGGG . CUGA . UGA . GC . . . . . AGCC . GAAGGA  
Dvu-3-2 CUCGGC . CUGA . CGA . GC . . . . . AGCC . GAAGGA  
Dvu-3-3 CUCGGC . CUGA . CGA . GC . . . . . AGCC . GAAAGC  
Dvu-2-1 CCCGGC . CUGA . CGA . GC . . . . . AGCC . AACGAG  
Dma-1-1 CCCGGC . CUGA . CGA . GC . . . . . AGCC . GAGGCG  
env-129 CUCGGC . CUGA . UGA . GC . . . . . AGCC . GAAAGG  
Dpi-1-3 CUCGGC . CUGA . CGA . GC . . . . . AGCC . AUGAGA  
Dpi-1-5 CUCGGC . CUGA . CGA . GC . . . . . AGCC . AUGAGA  
Bbr-2-2 CCGGGCA . CUGA . UGA . GC . . . . . AGCC . AUACCA  
Bps-2-1 CCGAGUA . CUGA . CGAUGC . . . . . AGCC . GAGGAA  
Bps-1-1 CCGAGUA . CUGA . CGAUGC . . . . . AGCC . GAGGAA  
Bce-5-1 CCCGGUA . CUGA . CGAUGC . . . . . AGCC . GAGGAA  
Tsp-1-1 CCCGGCA . CUGA . UGA . GC . . . . . AGCC . AGAGUG  
Rso-1-1 CCCGACA . CUGA . UGA . GC . . . . . AGCC . AGAGGG  
Tau-1-2 UCCGGUA . CUGA . UGA . GC . . . . . AGCC . UAGCAA  
env-130 UCCGGUA . CUGA . UGA . GC . . . . . AGCC . ACCCAU  
Pph-3-1 UCCGGUA . CUGA . UGA . GC . . . . . AGCC . ACCCAU  
Pph-5-1 UCCGGUA . CUGA . UGA . GC . . . . . AGCC . ACCCAU  
Pph-1-1 UCCGGUA . CUGA . UGA . GC . . . . . AGCC . ACCCAU

>>>>>> . . . . . >>>> . . . . .  
?222222 . . . . . 2222 . . . . .  
. . . . . >>> . >>> . . . . .  
. . . . . ??? . ??? . . . . .  
oY●●●●●-CUGA-YGA-G●o-----AG●Y-●●●●●

Pae-1-1 **UCCGGUA**..CUGA.CGA.**GC**.....**AGCC**.AACCAA  
 Pph-4-1 **UCCGGUA**..CUGA.UGA.**GC**.....**AGCC**.ACCCAU  
 env-131 **UCUGUCA**..CUGA.UGA.**GC**.....**AAGGC**.AACGGA  
 env-132 **ACCGGGC**..CUGA.UGA**UGCG**.....**AGCC**.GAAAGG  
 env-133 **CCGGCA**..CUGA.UGA.**GGC**.....**AACC**.AAACGG  
 env-134 **CCGACA**..CUGAAUGA.**GAC**.....**AGGC**.UACCAA  
 env-135 **CUGCCA**..CUGA.UGA.**GAC**.....**AGGC**.CAACCA  
 env-136 **CCUGCCG**..CUGA.AGU.**GAC**.....**AGGC**.CAAAGU  
 env-137 **CCUGCA**..CUGA.UGA.**GAC**.....**AGGU**.CACUUG  
 env-138 **CAUUGCC**..CUGA.AGA.**GUC**.....**AGGU**.CACAAC  
 env-139 **CCCUGCC**..CUGA.AGA.**GCC**.....**AGGU**.CAUUUAU  
 env-140 **CCCUGCC**..CUGA.AGA.**GCU**.....**AGGU**.CACUAU  
 env-141 **CCUGCC**..CUGA.CGA**UGCC**.....**AGGU**.CAUUUAU  
 env-142 **CCCUGCC**..CUGA.AGA.**GAC**.....**AGGU**.CACUGU  
 env-143 **CCCAAC**..CUGA.UGA.**GUC**.....**AGGU**.CAUUGU  
 env-144 **CACUGCC**..CUGA.AGA.**GUU**.....**AGGU**.CACUGU  
 env-145 **CACUGCC**..CUGA.AGA.**GUC**.....**AGGU**.CAUUGU  
 env-147 **ACCGUC**..CUGA.AGA.**GUC**.....**AGGU**.CACAAC  
 env-148 **ACCGUC**..CUGA.AGA.**GUC**.....**AGGU**.CACAUC  
 env-149 **ACCUAUC**..CUGA.CGA.**GUC**.....**CAGGU**.CCUGUC  
 env-150 **ACCUAUC**..CUGA.CGA.**GUC**.....**CAGGU**.CCUGUC  
 Cas-1-1 **UCCGUGU**..CUGA.UGA**UGGC**.....**AGGU**.CAACGG  
 env-153 **CCGGCUA**..CUGA.UGA.**GGC**.....**AGGA**.CACAGG  
 env-154 **CGUUGCG**..CUGA.UGA**UGGC**.....**AGGC**.GAGAAA  
 env-155 **CGACGCG**..CUGA.CGA.**GGU**.....**AGGC**.CGAAAA  
 env-156 **CCGCCUC**..CUGA.CGA**UGCC**.....**AGAC**.AGCAAU  
 env-157 **CCGUGC**..CUGA.UGA.**GGC**.....**AGGU**.ACCUCG  
 env-158 **CCGGUCG**..CUGA.UGA**AGGC**.....**AGCC**.AACCCAC  
 env-159 **CCGGGC**..CUGA.CGA**AGGC**.....**AGAC**.ACCACC  
 env-160 **CCGGGC**..CUGA.CGA**AGGC**.....**AGAC**.ACCACC  
 env-161 **CCGGGC**..CUGA.CGA**UGGC**.....**AACC**.ACACAC  
 env-162 **CCGGGU**..CUGA.CGA**UGGC**.....**AGCU**.ACCCAU  
 env-163 **CCGGGC**..CUGA.CGA**UGGC**.....**AGCU**.ACCCAU  
 env-164 **CCUUGA**..CUGA.UGA.**GUCC**.....**AUCG**.GCAAAC  
 env-165 **ACGACG**..CUGA.UGA.**GAUC**.....**AGAA**.ACAAAA  
 env-166 **ACACG**..CUGA.UGA.**GAUC**.....**AGAA**.AUAAAA  
 env-167 **CCCUAA**..CUGA.UGA.**GAUC**.....**AGAA**.ACUAAA  
 env-168 **CCCUAA**..CUGA.UGA.**GGUC**.....**AGAA**.ACUAAA  
 env-169 **CCCUAA**..CUGA.UGA.**GGUC**.....**AGAA**.ACUAAA  
 env-170 **CCCUAA**..CUGA.UGA.**GAUC**..AGAA**ACU**.AAAA**GA**  
 env-171 **UCCUAA**..CUGA.UGA.**GAUC**..AGAA**ACU**.AAAA**GA**  
 env-172 **CCCUAA**..CUGA.UGA.**GGUC**..AGAA**ACU**.AAAA**GA**  
 env-175 **CCCUAA**..CUGA.UGA.**GGUC**..AGAA**ACU**.AAAA**GA**  
 Bok-1-2 **CGCGUA**..CUGA.UGA.**GACC**.....**AACG**.AAACGG  
 Bmu-1-1 **CGUGUA**..CUGC.UGA.**GAUC**.....**AGCG**.CCAUCG  
 Bok-1-3 **CCGCUA**..CUGA.UGA.**GACC**.....**AACC**.ACACGG  
 env-176 **CCGCA**..CUGA.CGA.**GACC**.....**AAAC**.AACGGA  
 env-177 **CCGGCA**..CUGA.AGA.**GAUC**.AAC**AGG**..AGAAAA  
 env-178 **CCCGUG**..CUGA.UGA.**GGCC**.....**AGUC**.GUCCUC  
 env-179 **CCACGUG**..CUGA.UGA.**GGG**.....**AGCC**.CUUGUC  
 >>>>>>.....>>>>.....  
 ?222222.....2222.....  
 .....>>>.>>>...  
 .....???..???.  
 oY●●●●●-CUGA-YGA-G●●●●●-AG●Y●●●●●

## 4 Type III hammerhead ribozymes

### 4.1 Taxa

The taxonomy of each organism containing a putative type III hammerhead ribozyme is listed, with abbreviations identifying each hit (e.g., “Eco-1-1” and “Eco-1-2” might hypothetically represent two distinct RNAs in *E. coli*). The abbreviations will be used to identify each individual type III hammerhead ribozyme in Sections 4.2 and 4.3.

| abbrev. of hits     | taxonomy of species                                                                                                                                                                                         |
|---------------------|-------------------------------------------------------------------------------------------------------------------------------------------------------------------------------------------------------------|
| Mva-1-1             | Bacteria Actinobacteria Actinobacteridae Actinomycetales Corynebacterineae Mycobacteriaceae <i>Mycobacterium vanbaalenii</i> PYR-1                                                                          |
| Gsp-1-1             | Bacteria Firmicutes Bacillales Bacillaceae <i>Geobacillus sp.</i> Y412MC10                                                                                                                                  |
| Aca-1-1 to Aca-1-2  | Bacteria Proteobacteria Alphaproteobacteria Rhizobiales Xanthobacteraceae <i>Azorhizobium caulinodans</i> ORS 571                                                                                           |
| Ehi-1-1             | Eukaryota Amoebozoa Archamoebae Entamoebidae <i>Entamoeba histolytica</i> HM-1:IMSS                                                                                                                         |
| Isc-1-1 to Isc-1-3  | Eukaryota Metazoa Arthropoda Chelicerata Arachnida Acari Parasitiformes Ixodida Ixodoidea Ixodidae Ixodinae <i>Ixodes scapularis</i>                                                                        |
| Tca-1-1 to Tca-1-8  | Eukaryota Metazoa Arthropoda Hexapoda Insecta Pterygota Neoptera Endopterygota Coleoptera Polyphaga Cucujiformia Tenebrionidae <i>Tribolium castaneum</i>                                                   |
| Dpe-1-1 to Dpe-1-3  | Eukaryota Metazoa Arthropoda Hexapoda Insecta Pterygota Neoptera Endopterygota Diptera Brachycera Muscomorpha Ephydroidea Drosophilidae <i>Drosophila Sophophora Drosophila persimilis</i>                  |
| Dps-1-1 to Dps-1-3  | Eukaryota Metazoa Arthropoda Hexapoda Insecta Pterygota Neoptera Endopterygota Diptera Brachycera Muscomorpha Ephydroidea Drosophilidae <i>Drosophila Sophophora Drosophila pseudoobscura pseudoobscura</i> |
| Aae-1-1 to Aae-1-31 | Eukaryota Metazoa Arthropoda Hexapoda Insecta Pterygota Neoptera Endopterygota Diptera Nematocera Culicoidea Culicidae Culicinae Culicini Aedes <i>Stegomyia Aedes aegypti</i>                              |
| Cqu-1-1 to Cqu-1-2  | Eukaryota Metazoa Arthropoda Hexapoda Insecta Pterygota Neoptera Endopterygota Diptera Nematocera Culicoidea Culicidae Culicinae Culicini Culex <i>Culex quinquefasciatus</i>                               |
| Ame-1-1 to Ame-1-8  | Eukaryota Metazoa Arthropoda Hexapoda Insecta Pterygota Neoptera Endopterygota Hymenoptera Apocrita Aculeata Apoidea Apidae <i>Apis mellifera</i>                                                           |
| Nvi-1-1 to Nvi-1-16 | Eukaryota Metazoa Arthropoda Hexapoda Insecta Pterygota Neoptera Endopterygota Hymenoptera Apocrita Chalcidoidea Pteromalidae Pteromalinae <i>Nasonia vitripennis</i>                                       |
| Bfl-1-1 to Bfl-1-2  | Eukaryota Metazoa Chordata Cephalochordata Branchiostomidae <i>Branchiostoma floridae</i>                                                                                                                   |
| Dre-1-1 to Dre-1-6  | Eukaryota Metazoa Chordata Craniata Vertebrata Euteleostomi Actinopterygii Neopterygii Teleostei Ostariophysi Cypriniformes Cyprinidae <i>Danio rerio</i>                                                   |
| Mmu-1-1 to Mmu-1-7  | Eukaryota Metazoa Chordata Craniata Vertebrata Euteleostomi Mammalia Eutheria Euarchontoglires Glires Rodentia Sciurognathi Muroidea Muridae Murinae <i>Mus musculus</i>                                    |
| Rno-1-1 to Rno-1-8  | Eukaryota Metazoa Chordata Craniata Vertebrata Euteleostomi Mammalia Eutheria Euarchontoglires Glires Rodentia Sciurognathi Muroidea Muridae Murinae <i>Rattus norvegicus</i>                               |
| Mmu-2-1 to Mmu-2-3  | Eukaryota Metazoa Chordata Craniata Vertebrata Euteleostomi Mammalia Eutheria Euarchontoglires Primates Haplorrhini Catarrhini Cercopitheciidae Cercopitheciinae <i>Macaca mulatta</i>                      |
| Hsa-1-1 to Hsa-1-6  | Eukaryota Metazoa Chordata Craniata Vertebrata Euteleostomi Mammalia Eutheria Euarchontoglires Primates Haplorrhini Catarrhini Hominidae <i>Homo sapiens</i>                                                |
| Ptr-1-1 to Ptr-1-2  | Eukaryota Metazoa Chordata Craniata Vertebrata Euteleostomi Mammalia Eutheria Euarchontoglires Primates Haplorrhini Catarrhini Hominidae <i>Pan troglodytes</i>                                             |
| Bta-1-1 to Bta-1-2  | Eukaryota Metazoa Chordata Craniata Vertebrata Euteleostomi Mammalia Eutheria Laurasiatheria Cetartiodactyla Ruminantia Pecora Bovidae Bovinae <i>Bos taurus</i>                                            |
| Oan-1-1 to Oan-1-2  | Eukaryota Metazoa Chordata Craniata Vertebrata Euteleostomi Mammalia Monotremata Ornithorhynchidae <i>Ornithorhynchus anatinus</i>                                                                          |
| Cin-1-1             | Eukaryota Metazoa Chordata Tunicata Ascidiacea Enterogona Phlebobranchia Cionidae <i>Ciona intestinalis</i>                                                                                                 |
| Nve-1-1 to Nve-1-40 | Eukaryota Metazoa Cnidaria Anthozoa Hexacorallia Actiniaria Edwardsiidae <i>Nematostella vectensis</i>                                                                                                      |
| Hma-1-1 to Hma-1-40 | Eukaryota Metazoa Cnidaria Hydrozoa Hydroida Anthomedusae Hydridae <i>Hydra magnipapillata</i>                                                                                                              |
| Sma-1-1 to Sma-1-22 | Eukaryota Metazoa Platyhelminthes Trematoda Digenea Strigeidida Schistosomatoidea Schistosomatidae <i>Schistosoma mansoni</i>                                                                               |
| Cre-1-1             | Eukaryota Viridiplantae Chlorophyta Chlorophyceae Chlamydomonadales Chlamydomonadaceae <i>Chlamydomonas reinhardtii</i>                                                                                     |



|                    |                                                                                                                                                                                                      |
|--------------------|------------------------------------------------------------------------------------------------------------------------------------------------------------------------------------------------------|
| Ppa-1-1            | Eukaryota Viridiplantae Streptophyta Embryophyta Bryophyta Moss Superclass V Bryopsida Funariidae Funariales Funariaceae <i>Physcomitrella patens</i>                                                |
| Ath-1-1 to Ath-1-2 | Eukaryota Viridiplantae Streptophyta Embryophyta Tracheophyta Spermatophyta Magnoliophyta eudicotyledons core eudicotyledons rosids eurosids II Brassicales Brassicaceae <i>Arabidopsis thaliana</i> |
| Vvi-1-1 to Vvi-1-5 | Eukaryota Viridiplantae Streptophyta Embryophyta Tracheophyta Spermatophyta Magnoliophyta eudicotyledons core eudicotyledons Vitales Vitaceae <i>Vitis vinifera</i>                                  |
| Ela-1-1            | Viroids Avsunviroidae Elaviroid <i>Eggplant latent viroid</i>                                                                                                                                        |
| Cch-1-1            | Viroids Avsunviroidae Pelamoviroid <i>Chrysanthemum chlorotic mottle viroid</i>                                                                                                                      |
| Pla-1-1 to Pla-1-2 | Viroids Avsunviroidae Pelamoviroid <i>Peach latent mosaic viroid</i>                                                                                                                                 |
| Msm-1-1            | Viroids unclassified viroids <i>Mulberry small circular viroid-like</i> RNA 1                                                                                                                        |
| Pph-1-1            | Viruses dsDNA viruses, no RNA stage Caudovirales Podoviridae Autographivirinae <i>Pseudomonas phage</i> LKA1                                                                                         |
| Pph-2-1            | Viruses dsDNA viruses, no RNA stage Caudovirales Podoviridae <i>Pseudomonas phage</i> PaP3                                                                                                           |
| Cye-1-1            | Viruses Satellites Satellite Nucleic Acids Single stranded RNA satellites Circular single stranded RNA satellites <i>Cereal yellow dwarf virus-RPV</i> satellite RNA                                 |
| Ltr-1-1 to Ltr-1-2 | Viruses Satellites Satellite Nucleic Acids Single stranded RNA satellites Circular single stranded RNA satellites <i>Lucerne transient streak virus</i> satellite RNA                                |
| Scl-1-1            | Viruses Satellites Satellite Nucleic Acids Single stranded RNA satellites Circular single stranded RNA satellites <i>Subterranean clover mottle virus</i> satellite RNA                              |
| env-1 to env-144   | environmental samples                                                                                                                                                                                |

## 4.2 Nucleotide coordinates

Each type III hammerhead ribozyme (indicated by “RNA→”) is listed. The accession number of the sequence containing each type III hammerhead ribozyme is given. Accessions beginning with “NC\_” or “NZ\_” are RefSeq, while other accession refer to environmental samples. Nucleotide coordinates are given for the 5′ and 3′ boundaries

of each. If the 5′ coordinate is greater than the 3′ coordinate, the RNA is present on the reverse-complement strand of the containing genomic DNA sequence. Each hit is denoted by an abbreviation (like “Eco-1-1”) that refers to a taxonomy given in Section 4.1.

| abbrev. | Seq. accession         |   | 5′ at    | 3′ at    |
|---------|------------------------|---|----------|----------|
| Bfl-1-1 | NW_002235167.1         | - | 1205677  | 1205607  |
| Bfl-1-2 | NW_002235260.1         | + | 737408   | 737478   |
| Dps-1-1 | NW_001589961.1         | + | 7534447  | 7534529  |
| Dpe-1-1 | NW_001985966.1         | + | 2180214  | 2180296  |
| Dps-1-2 | NC_0090006.1           | + | 7960313  | 7960399  |
| Dpe-1-2 | NW_001985957.1         | + | 1873105  | 1873191  |
| Dpe-1-3 | NW_001985960.1         | + | 1989436  | 1989522  |
| Dps-1-3 | NC_0090006.1           | + | 8140768  | 8140854  |
| Aae-1-1 | NW_001810927.1         | - | 1637605  | 1637548  |
| env-1   | ABOJ01036821           | - | 85       | 18       |
| env-2   | wf2_AHAA5472_y1        | + | 116      | 174      |
| Nve-1-1 | NW_001832996.1         | - | 17858    | 17778    |
| Nve-1-2 | NW_001834395.1         | - | 883561   | 883481   |
| env-3   | JCVLSCAF_1096627276051 | - | 1270     | 1119     |
| env-4   | JCVLSCAF_1096627276051 | - | 160      | 9        |
| env-5   | JCVLSCAF_1096627276051 | - | 715      | 564      |
| Tca-1-1 | NC_007422.2            | - | 12426207 | 12426139 |
| Tca-1-2 | NW_001092868.1         | - | 1276741  | 1276673  |
| Tca-1-3 | NC_007420.2            | + | 3076941  | 3077014  |

|         |                         |   |           |           |
|---------|-------------------------|---|-----------|-----------|
| Tca-1-4 | NW_001092825.1          | + | 195810    | 195883    |
| env-6   | JCVL_SCAF_1096627287253 | + | 1361      | 1426      |
| Oan-1-1 | NW_001794172.1          | + | 112395    | 112449    |
| Mmu-2-1 | NW_001099989.1          | + | 4264      | 4344      |
| Ptr-1-1 | NW_001231323.1          | + | 2115260   | 2115340   |
| Ptr-1-2 | NC_006469.2             | + | 102585438 | 102585518 |
| Hsa-1-1 | NT_022171.15            | + | 6823089   | 6823169   |
| Hsa-1-2 | NW_928052.1             | + | 3905009   | 3905089   |
| Hsa-1-3 | NW_001838818.2          | - | 4869784   | 4869704   |
| Hsa-1-4 | NC_000002.11            | + | 102149260 | 102149340 |
| Hsa-1-5 | AC_000045.1             | + | 96350680  | 96350760  |
| Hsa-1-6 | AC_000134.1             | + | 95912497  | 95912577  |
| env-7   | JCVL_SCAF_1096628274197 | + | 8         | 68        |
| Ppa-1-1 | NC_007945.1             | - | 41441     | 41382     |
| Mmu-1-1 | NT_039621.7             | + | 45308188  | 45308241  |
| Mmu-1-2 | NW_001030577.1          | + | 5246075   | 5246128   |
| Mmu-1-3 | AC_000037.1             | + | 86322674  | 86322727  |
| Mmu-1-4 | NC_000081.5             | + | 84022184  | 84022237  |
| Rno-1-1 | NW_048040.1             | + | 139914    | 139982    |
| Rno-1-2 | NW_001091916.1          | + | 5675527   | 5675595   |
| Rno-1-3 | AC_000089.1             | + | 27806874  | 27806942  |
| Rno-1-4 | NC_005120.2             | + | 48071152  | 48071220  |
| Dre-1-1 | NC_007115.3             | + | 38539130  | 38539182  |
| Dre-1-2 | NW_001878929.1          | + | 1273137   | 1273189   |
| Dre-1-3 | NC_007131.3             | + | 31455350  | 31455410  |
| Dre-1-4 | NW_001878142.1          | + | 2133661   | 2133721   |
| Dre-1-5 | NC_007120.3             | + | 16459690  | 16459745  |
| Dre-1-6 | NW_001879464.1          | + | 3811356   | 3811411   |
| env-8   | AJ247113.1              | - | 134       | 53        |
| env-9   | AJ247123.1              | - | 132       | 52        |
| env-10  | AJ247121.1              | - | 133       | 53        |
| env-11  | AJ247122.1              | - | 132       | 52        |
| Cch-1-1 | NC_003540.1             | - | 136       | 50        |
| Nve-1-3 | NW_001831970.1          | + | 11211     | 11293     |
| Nve-1-4 | NW_001834179.1          | - | 194500    | 194418    |
| Nve-1-5 | NW_001833417.1          | - | 6963      | 6881      |
| Mmu-1-5 | NT_039353.7             | - | 78738873  | 78738783  |
| Mmu-1-6 | NW_001034942.1          | + | 8828      | 8918      |
| Mmu-1-7 | NC_000072.5             | - | 126425911 | 126425821 |
| Rno-1-5 | NW_047689.2             | + | 4289911   | 4289975   |
| Rno-1-6 | AC_000072.1             | + | 32283519  | 32283583  |
| Rno-1-7 | NC_005103.2             | + | 33810285  | 33810349  |
| Rno-1-8 | NW_001084827.1          | + | 4048369   | 4048433   |
| env-12  | NCBI_READ_1112290494126 | + | 51        | 113       |
| Isc-1-1 | NW_002830509.1          | - | 4182      | 4121      |
| Nve-1-6 | NW_001832211.1          | + | 5464      | 5520      |
| Cin-1-1 | NW_001955244.1          | + | 145208    | 145286    |
| env-13  | JCVL_SCAF_1096628347006 | - | 1403      | 1298      |
| Cre-1-1 | NW_001843987.1          | + | 816825    | 816907    |
| env-14  | orpgwFw301.FCAY94858_y1 | + | 296       | 356       |
| Bta-1-1 | NW_001493123.2          | - | 1530591   | 1530539   |
| Bta-1-2 | NC_007311.3             | - | 35935934  | 35935882  |

|          |                        |   |           |           |
|----------|------------------------|---|-----------|-----------|
| Nve-1-7  | NW_001834384.1         | + | 761986    | 762056    |
| Isc-1-2  | NW_002538761.1         | + | 254943    | 255022    |
| env-15   | ABMF01081507           | - | 95        | 42        |
| Gsp-1-1  | NZ_ABRG01000001.1      | - | 575954    | 575900    |
| env-16   | NCBLREAD_1113216246066 | + | 127       | 181       |
| env-17   | JCVLSCAF_1096627443639 | - | 863       | 807       |
| env-18   | JCVLSCAF_1096627616097 | + | 625       | 688       |
| env-19   | NCBLREAD_1113289505635 | - | 240       | 166       |
| env-20   | ABMB01014284           | + | 21        | 73        |
| env-21   | JCVLSCAF_1096626136427 | - | 803       | 750       |
| Nve-1-8  | NW_001834385.1         | - | 1081250   | 1081189   |
| Nve-1-9  | NW_001834396.1         | + | 1073655   | 1073707   |
| Nve-1-10 | NW_001834154.1         | - | 310909    | 310853    |
| Nve-1-11 | NW_001834410.1         | - | 592322    | 592272    |
| Nve-1-12 | NW_001834401.1         | - | 1801729   | 1801657   |
| Nve-1-13 | NW_001833664.1         | + | 42614     | 42687     |
| Nve-1-14 | NW_001834209.1         | - | 184199    | 184126    |
| Nve-1-15 | NW_001834219.1         | + | 139772    | 139845    |
| Nve-1-16 | NW_001834368.1         | + | 231390    | 231463    |
| Nve-1-17 | NW_001834347.1         | + | 862824    | 862897    |
| Nve-1-18 | NW_001834397.1         | + | 77054     | 77127     |
| Nve-1-19 | NW_001834016.1         | - | 17866     | 17807     |
| Nve-1-20 | NW_001834244.1         | + | 39400     | 39469     |
| env-22   | JCVLSCAF_1101668156249 | - | 728       | 672       |
| Aca-1-1  | NC_009937.1            | - | 4100975   | 4100913   |
| Sma-1-1  | NW_003024785.1         | + | 68        | 162       |
| Sma-1-2  | NW_003024785.1         | + | 401       | 495       |
| Sma-1-3  | NW_003034794.1         | - | 970       | 876       |
| Ehi-1-1  | NW_001916244.1         | - | 670       | 576       |
| Sma-1-4  | NW_003037911.1         | - | 872901    | 872807    |
| Sma-1-5  | NW_003037911.1         | - | 872568    | 872474    |
| Sma-1-6  | NS_000200.1            | + | 352260014 | 352260108 |
| Sma-1-7  | NS_000200.1            | + | 352260347 | 352260441 |
| Sma-1-8  | NS_000200.1            | - | 347003646 | 347003552 |
| Sma-1-9  | NS_000200.1            | - | 156660254 | 156660160 |
| Sma-1-10 | NS_000200.1            | - | 156659921 | 156659827 |
| Sma-1-11 | NW_003037792.1         | + | 120796    | 120893    |
| Sma-1-12 | NS_000200.1            | + | 382558140 | 382558237 |
| env-23   | JCVLSCAF_1096627284510 | + | 135       | 186       |
| env-24   | JCVLSCAF_1101667034602 | + | 233       | 284       |
| env-25   | ABMF01222492           | - | 74        | 23        |
| env-26   | NCBLREAD_1113171821044 | - | 747       | 686       |
| Mva-1-1  | NC_008726.1            | + | 2184556   | 2184608   |
| env-27   | JCVLSCAF_1096627443639 | - | 1797      | 1742      |
| Oan-1-2  | NW_001794724.1         | + | 959536    | 959593    |
| Sma-1-13 | NW_003037830.1         | - | 1503887   | 1503828   |
| Sma-1-14 | NS_000200.1            | - | 69394258  | 69394199  |
| Sma-1-15 | NW_003037912.1         | - | 1340005   | 1339938   |
| Sma-1-16 | NS_000200.1            | - | 158151580 | 158151513 |
| Pph-2-1  | NC_004466.2            | - | 45468     | 45418     |
| env-28   | JCVLSCAF_1096628323592 | - | 1119      | 1048      |
| env-29   | JCVLSCAF_1096627409381 | + | 101       | 157       |

|          |                         |   |          |          |
|----------|-------------------------|---|----------|----------|
| env-30   | orpgwFw301.FCAY53166.g1 | - | 553      | 469      |
| Nvi-1-1  | NW_001820387.1          | + | 170775   | 170843   |
| Nvi-1-2  | NW_001815211.1          | + | 5859     | 5925     |
| env-31   | JCVLSCAF_1096627932822  | - | 162      | 108      |
| env-32   | JCVLSCAF_1096627942234  | - | 128      | 74       |
| env-33   | JCVLSCAF_1101667575007  | + | 295      | 371      |
| Aae-1-2  | NW_001810980.1          | - | 174458   | 174403   |
| env-34   | JCVLSCAF_1096627720695  | - | 1289     | 1236     |
| Cqu-1-1  | NW_001887618.1          | - | 13781    | 13718    |
| Cqu-1-2  | NW_001887553.1          | + | 178615   | 178694   |
| Aae-1-3  | NW_001811065.1          | + | 784681   | 784739   |
| Aae-1-4  | NW_001810756.1          | + | 868305   | 868399   |
| Aae-1-5  | NW_001811406.1          | - | 368060   | 367994   |
| Aae-1-6  | NW_001811266.1          | + | 566973   | 567081   |
| Aae-1-7  | NW_001809838.1          | + | 105984   | 106110   |
| Aae-1-8  | NW_001810947.1          | + | 279815   | 279886   |
| Aae-1-9  | NW_001810508.1          | + | 776011   | 776073   |
| Aae-1-10 | NW_001811748.1          | - | 316046   | 315990   |
| Aae-1-11 | NW_001811196.1          | + | 2880920  | 2880989  |
| Aae-1-12 | NW_001811640.1          | + | 1937456  | 1937517  |
| Aae-1-13 | NW_001811185.1          | - | 289439   | 289376   |
| Aae-1-14 | NW_001811757.1          | + | 105717   | 105785   |
| Aae-1-15 | NW_001810984.1          | - | 1489468  | 1489404  |
| Aae-1-16 | NW_001809912.1          | - | 1717631  | 1717566  |
| Aae-1-17 | NW_001810791.1          | - | 1556967  | 1556907  |
| Aae-1-18 | NW_001811114.1          | + | 882751   | 882815   |
| Aae-1-19 | NW_001811037.1          | + | 904814   | 904886   |
| Aae-1-20 | NW_001809924.1          | - | 2297238  | 2297179  |
| Aae-1-21 | NW_001811252.1          | - | 1596591  | 1596522  |
| Aae-1-22 | NW_001809894.1          | + | 192086   | 192137   |
| Aae-1-23 | NW_001811501.1          | - | 492742   | 492648   |
| Aae-1-24 | NW_001811054.1          | - | 940409   | 940332   |
| Aae-1-25 | NW_001809801.1          | - | 1476117  | 1476043  |
| Aae-1-26 | NW_001811351.1          | + | 3685950  | 3686006  |
| Aae-1-27 | NW_001811027.1          | + | 44088    | 44142    |
| Aae-1-28 | NW_001811306.1          | - | 518718   | 518664   |
| Aae-1-29 | NW_001811251.1          | - | 28656    | 28602    |
| Aae-1-30 | NW_001811201.1          | - | 513676   | 513620   |
| Aae-1-31 | NW_001810999.1          | - | 1104299  | 1104228  |
| Scl-1-1  | NC_003851.1             | + | 56       | 111      |
| Tca-1-5  | NC_007418.2             | - | 13925634 | 13925510 |
| Tca-1-6  | NW_001093437.1          | - | 554719   | 554595   |
| Tca-1-7  | NC_007418.2             | + | 472370   | 472496   |
| Tca-1-8  | NW_001092787.1          | + | 472370   | 472496   |
| Ltr-1-1  | NC_003798.1             | - | 169      | 108      |
| env-35   | Y12833.1                | - | 339      | 285      |
| env-36   | JCVLSCAF_1101668609644  | + | 343      | 400      |
| Ame-1-1  | NW_001253139.1          | - | 18472    | 18401    |
| Ame-1-2  | NC_007084.2             | - | 9511266  | 9511195  |
| Ame-1-3  | NW_001253139.1          | - | 18766    | 18695    |
| Ame-1-4  | NC_007084.2             | - | 9511560  | 9511489  |
| Sma-1-17 | NW_003037943.1          | - | 473268   | 473168   |

|          |                         |   |           |           |
|----------|-------------------------|---|-----------|-----------|
| Sma-1-18 | NS_000200.1             | - | 187494801 | 187494701 |
| Isc-1-3  | NW_002630843.1          | + | 5290      | 5358      |
| env-37   | orpgwFw301.FCAY1503.g1  | - | 255       | 200       |
| Mmu-2-2  | NW_001098159.1          | - | 9980991   | 9980916   |
| Mmu-2-3  | NC_007869.1             | - | 25258509  | 25258434  |
| env-38   | ABLX01073025            | + | 20        | 70        |
| Nvi-1-3  | NW_001818089.1          | - | 882       | 797       |
| Pph-1-1  | NC_009936.1             | + | 1501      | 1555      |
| env-39   | JCVL_SCAF_1101668174207 | - | 211       | 158       |
| Nve-1-21 | NW_001834070.1          | - | 172577    | 172507    |
| Nve-1-22 | NW_001825682.1          | + | 664       | 737       |
| Nve-1-23 | NW_001833866.1          | + | 93399     | 93472     |
| Nve-1-24 | NW_001834189.1          | + | 275747    | 275820    |
| Nve-1-25 | NW_001834413.1          | + | 1487615   | 1487688   |
| Nve-1-26 | NW_001834049.1          | + | 112842    | 112915    |
| Nve-1-27 | NW_001834140.1          | - | 157703    | 157630    |
| Nve-1-28 | NW_001834170.1          | + | 81908     | 81981     |
| Nve-1-29 | NW_001834156.1          | - | 177993    | 177920    |
| Nve-1-30 | NW_001834156.1          | - | 174827    | 174754    |
| Nve-1-31 | NW_001829929.1          | - | 5466      | 5393      |
| Nve-1-32 | NW_001834304.1          | - | 181535    | 181470    |
| Nve-1-33 | NW_001834310.1          | - | 523008    | 522935    |
| Msm-1-1  | NC_011362.1             | - | 273       | 219       |
| Nvi-1-4  | NW_001820327.1          | + | 556533    | 556597    |
| Nvi-1-5  | NW_001818627.1          | - | 2349      | 2285      |
| Nvi-1-6  | NW_001817636.1          | + | 181544    | 181608    |
| Nvi-1-7  | NW_001815359.1          | - | 300141    | 300077    |
| Nvi-1-8  | NW_001820644.1          | - | 43460     | 43393     |
| Nvi-1-9  | NW_001815892.1          | + | 129187    | 129251    |
| Nvi-1-10 | NW_001816137.1          | - | 10940     | 10876     |
| Nvi-1-11 | NW_001816114.1          | + | 165568    | 165632    |
| Nvi-1-12 | NW_001814615.1          | + | 397954    | 398018    |
| Nvi-1-13 | NW_001815594.1          | + | 11735     | 11799     |
| Nvi-1-14 | NW_001819237.1          | + | 33096     | 33160     |
| Nvi-1-15 | NW_001820360.1          | + | 408022    | 408086    |
| Nvi-1-16 | NW_001820638.1          | + | 2143675   | 2143739   |
| Sma-1-19 | NW_003037917.1          | + | 511089    | 511164    |
| Sma-1-20 | NS_000200.1             | + | 165547893 | 165547968 |
| Sma-1-21 | NW_003038153.1          | - | 487803    | 487728    |
| Sma-1-22 | NS_000200.1             | - | 293549852 | 293549777 |
| Nve-1-34 | NW_001834356.1          | - | 865664    | 865603    |
| Nve-1-35 | NW_001834216.1          | + | 2920      | 2977      |
| Nve-1-36 | NW_001834234.1          | + | 204243    | 204341    |
| Nve-1-37 | NW_001834390.1          | - | 1590127   | 1590080   |
| Nve-1-38 | NW_001832983.1          | - | 13022     | 12940     |
| Nve-1-39 | NW_001834401.1          | - | 1804256   | 1804191   |
| Nve-1-40 | NW_001834401.1          | - | 1800005   | 1799940   |
| env-40   | NCBI_READ_1113215438442 | - | 213       | 157       |
| Ame-1-5  | NW_001253221.1          | + | 206036    | 206109    |
| Ame-1-6  | NC_007070.2             | + | 2540772   | 2540845   |
| env-41   | JCVL_SCAF_1096627321756 | - | 378       | 319       |
| env-42   | JCVL_SCAF_1096626313467 | + | 49        | 101       |

|         |                         |   |         |         |
|---------|-------------------------|---|---------|---------|
| env-43  | JCVLSCAF_1096627829298  | - | 1179    | 1125    |
| env-44  | NCBI_READ_1112328250057 | - | 914     | 865     |
| env-45  | NCBI_READ_1112309101813 | - | 789     | 740     |
| env-46  | JCVLSCAF_1101667237532  | - | 455     | 403     |
| env-47  | ABML01222367            | + | 14      | 71      |
| env-48  | JCVLSCAF_1101668002641  | + | 1058    | 1115    |
| env-49  | JCVLSCAF_1101668565188  | + | 1018    | 1104    |
| Cye-1-1 | NC_003533.1             | - | 246     | 192     |
| env-50  | JCVLSCAF_1096626197647  | - | 505     | 448     |
| env-51  | JCVLSCAF_1101667183880  | - | 682     | 634     |
| env-52  | JCVLSCAF_1096628383288  | - | 707     | 653     |
| env-53  | JCVLSCAF_1096627008076  | + | 880     | 945     |
| env-54  | AJ536619.1              | - | 206     | 152     |
| Ela-1-1 | NC_004728.1             | - | 206     | 152     |
| env-55  | AJ536614.1              | - | 206     | 152     |
| env-56  | AJ536620.1              | - | 206     | 152     |
| env-57  | JCVLSCAF_1101668592145  | + | 812     | 862     |
| env-58  | NCBI_READ_1112309210113 | + | 161     | 213     |
| env-59  | NCBI_READ_1113316014237 | + | 422     | 472     |
| env-60  | ABLW01115605            | - | 67      | 13      |
| env-61  | JCVLSCAF_1101668159470  | + | 678     | 728     |
| env-62  | JCVLSCAF_1101668631219  | - | 1018    | 966     |
| env-63  | NCBI_READ_1113297827809 | + | 831     | 882     |
| env-64  | JCVLSCAF_1096627934312  | + | 536     | 590     |
| Ame-1-7 | NW_001253221.1          | + | 205331  | 205403  |
| Ame-1-8 | NC_007070.2             | + | 2540067 | 2540139 |
| env-65  | JCVLSCAF_1096627486141  | - | 756     | 701     |
| env-66  | JCVLSCAF_1096627928381  | - | 1057    | 1007    |
| env-67  | JCVLSCAF_1096626845077  | - | 1981    | 1928    |
| env-68  | JCVLSCAF_1096627471453  | + | 218     | 271     |
| env-69  | AF170503.1              | + | 280     | 333     |
| env-70  | AF170503.1              | - | 55      | 3       |
| env-71  | AJ550906.1              | - | 56      | 3       |
| env-72  | AJ550910.1              | - | 56      | 3       |
| env-73  | AJ550908.1              | - | 56      | 3       |
| env-74  | AJ550907.1              | - | 56      | 3       |
| env-75  | AJ550909.1              | - | 56      | 3       |
| Pla-1-1 | NC_003636.1             | - | 58      | 1       |
| env-76  | AJ550911.1              | - | 56      | 3       |
| env-77  | AJ550912.1              | - | 56      | 3       |
| env-78  | AJ005305.1              | - | 56      | 3       |
| env-79  | AJ241843.1              | - | 56      | 3       |
| env-80  | AJ241841.1              | - | 57      | 3       |
| env-81  | AJ005310.1              | - | 56      | 3       |
| env-82  | AJ241840.1              | - | 56      | 3       |
| env-83  | AJ241845.1              | - | 56      | 3       |
| env-84  | AF170499.1              | - | 56      | 3       |
| env-85  | AJ241839.1              | - | 56      | 3       |
| env-86  | AF170523.1              | - | 55      | 3       |
| env-87  | AF170520.1              | - | 55      | 3       |
| env-88  | AJ241830.1              | - | 56      | 3       |
| env-89  | AJ005303.1              | - | 56      | 3       |

|         |                         |   |          |          |
|---------|-------------------------|---|----------|----------|
| env-90  | AF170504.1              | - | 56       | 3        |
| env-91  | AJ005302.1              | - | 56       | 3        |
| env-92  | AJ241819.1              | - | 56       | 3        |
| env-93  | AJ241833.1              | - | 56       | 3        |
| env-94  | AJ241823.1              | - | 56       | 3        |
| env-95  | AJ005294.1              | - | 56       | 3        |
| env-96  | AJ005298.1              | - | 56       | 3        |
| env-97  | AJ005299.1              | - | 56       | 3        |
| env-98  | AJ005300.1              | - | 56       | 3        |
| env-99  | AJ241831.1              | - | 56       | 3        |
| env-100 | AJ241828.1              | - | 56       | 3        |
| env-101 | AJ005318.1              | - | 56       | 3        |
| env-102 | AJ005314.1              | - | 56       | 3        |
| env-103 | AJ005322.1              | - | 56       | 3        |
| env-104 | AJ241847.1              | - | 56       | 3        |
| env-105 | AJ005319.1              | - | 56       | 3        |
| env-106 | AJ005321.1              | - | 56       | 3        |
| env-107 | AJ241850.1              | - | 56       | 3        |
| env-108 | AJ005320.1              | - | 56       | 3        |
| env-109 | AF339739.1              | - | 56       | 3        |
| env-110 | AF170509.1              | - | 56       | 3        |
| env-111 | AF170519.1              | - | 55       | 3        |
| env-112 | AJ550898.1              | - | 56       | 3        |
| env-113 | AJ550900.1              | - | 56       | 3        |
| env-114 | AJ550899.1              | - | 56       | 3        |
| env-115 | AJ550901.1              | - | 56       | 3        |
| env-116 | AJ550898.1              | + | 282      | 335      |
| env-117 | AF170504.1              | + | 284      | 337      |
| env-118 | AF170523.1              | + | 282      | 335      |
| env-119 | AF170520.1              | + | 282      | 335      |
| env-120 | AJ005312.1              | + | 282      | 335      |
| env-121 | AJ241845.1              | + | 282      | 335      |
| env-122 | AJ241823.1              | + | 282      | 335      |
| env-123 | AJ005314.1              | + | 281      | 334      |
| env-124 | AJ005305.1              | + | 282      | 335      |
| env-125 | AJ550911.1              | + | 282      | 335      |
| env-126 | AJ005322.1              | + | 281      | 334      |
| Pla-1-2 | NC_003636.1             | + | 282      | 335      |
| env-127 | AJ241831.1              | + | 281      | 334      |
| env-128 | AJ550912.1              | + | 282      | 335      |
| env-129 | AJ241847.1              | + | 281      | 334      |
| env-130 | AJ005300.1              | + | 282      | 335      |
| env-131 | AJ005302.1              | + | 281      | 334      |
| Ath-1-1 | NC_003075.7             | - | 15027885 | 15027827 |
| Ath-1-2 | NC_003075.7             | - | 15032898 | 15032840 |
| Vvi-1-1 | NW_002238130.1          | - | 335250   | 335193   |
| Vvi-1-2 | NC_012023.2             | - | 5733031  | 5732974  |
| Vvi-1-3 | NW_002238116.1          | - | 2299102  | 2299045  |
| Vvi-1-4 | NW_002238099.1          | + | 1113132  | 1113189  |
| Vvi-1-5 | NC_012019.2             | + | 13346308 | 13346365 |
| env-132 | JCVL_SCAF_1101668066616 | + | 618      | 678      |
| env-133 | JCVL_SCAF_1101668066616 | + | 1215     | 1272     |

|          |                        |   |         |         |
|----------|------------------------|---|---------|---------|
| env-134  | JCVLSCAF_1101668066616 | + | 18      | 75      |
| env-135  | JCVLSCAF_1101668066616 | + | 429     | 488     |
| env-136  | JCVLSCAF_1101668613381 | - | 891     | 838     |
| Aca-1-2  | NC_009937.1            | - | 4100081 | 4100028 |
| env-137  | JCVLSCAF_1096627958234 | + | 578     | 642     |
| env-138  | JCVLSCAF_1101668654464 | - | 875     | 811     |
| env-139  | ABMF01057148           | - | 84      | 30      |
| env-140  | JCVLSCAF_1096627949830 | + | 496     | 551     |
| env-141  | JCVLSCAF_1101667039364 | - | 417     | 364     |
| env-142  | JCVLSCAF_1096627141243 | + | 775     | 833     |
| Hma-1-1  | NW_002151864.1         | + | 6056    | 6126    |
| Hma-1-2  | NW_002161536.1         | + | 5652    | 5722    |
| Hma-1-3  | NW_002099667.1         | + | 583     | 653     |
| Hma-1-4  | NW_002124177.1         | - | 43643   | 43572   |
| Hma-1-5  | NW_002151179.1         | + | 10358   | 10429   |
| Hma-1-6  | NW_002154052.1         | - | 196099  | 196028  |
| Hma-1-7  | NW_002160776.1         | + | 19248   | 19318   |
| Hma-1-8  | NW_002134962.1         | + | 24764   | 24834   |
| Hma-1-9  | NW_002067005.1         | + | 15893   | 15963   |
| Hma-1-10 | NW_002088127.1         | + | 3306    | 3376    |
| Hma-1-11 | NW_002102201.1         | - | 29990   | 29920   |
| Hma-1-12 | NW_002104693.1         | - | 8008    | 7938    |
| Hma-1-13 | NW_002112176.1         | - | 1401    | 1331    |
| Hma-1-14 | NW_002112804.1         | - | 1516    | 1446    |
| Hma-1-15 | NW_002117782.1         | - | 22335   | 22265   |
| Hma-1-16 | NW_002125799.1         | + | 257     | 327     |
| Hma-1-17 | NW_002132423.1         | + | 3274    | 3344    |
| Hma-1-18 | NW_002132832.1         | + | 13573   | 13643   |
| Hma-1-19 | NW_002136037.1         | - | 9175    | 9105    |
| Hma-1-20 | NW_002138915.1         | + | 183313  | 183383  |
| Hma-1-21 | NW_002147414.1         | - | 7659    | 7589    |
| Hma-1-22 | NW_002150128.1         | - | 38926   | 38856   |
| Hma-1-23 | NW_002150992.1         | + | 1737    | 1807    |
| Hma-1-24 | NW_002151013.1         | - | 129     | 59      |
| Hma-1-25 | NW_002151554.1         | - | 78876   | 78806   |
| Hma-1-26 | NW_002157024.1         | - | 33405   | 33335   |
| Hma-1-27 | NW_002157511.1         | - | 15310   | 15240   |
| Hma-1-28 | NW_002157762.1         | - | 14304   | 14234   |
| Hma-1-29 | NW_002158880.1         | - | 37510   | 37440   |
| Hma-1-30 | NW_002159477.1         | - | 13121   | 13051   |
| Hma-1-31 | NW_002160186.1         | - | 51922   | 51852   |
| Hma-1-32 | NW_002160219.1         | + | 31584   | 31654   |
| Hma-1-33 | NW_002162128.1         | - | 270580  | 270510  |
| Hma-1-34 | NW_002163033.1         | - | 35754   | 35684   |
| Hma-1-35 | NW_002163300.1         | + | 10076   | 10146   |
| Hma-1-36 | NW_002165423.1         | + | 49111   | 49181   |
| Hma-1-37 | NW_002189147.1         | - | 1163    | 1093    |
| Hma-1-38 | NW_002091160.1         | + | 665     | 735     |
| Hma-1-39 | NW_002157297.1         | - | 55095   | 55025   |
| Hma-1-40 | NW_002160437.1         | + | 52884   | 52954   |
| Ltr-1-2  | NC_003798.1            | + | 162     | 218     |
| env-143  | JCVLSCAF_1101668029164 | + | 27      | 82      |























```

env-135 .....GG.C.CGAAACGCAA...A
env-136 .....GG.G.CGAAACCC...A
Aca-1-2 .....GG.G.CGAAACGGG...
env-137 .....GAG.C.CGAAACUCGUGG..C
env-138 .....GAG.C.CGAAACUCGUGG..U
env-139 .....GGC.C.CGAAACGG...A
env-140 .....GGG.C.CGAAACGGG...C
env-141 .....GG.C.CGAAACGUG...A
env-142 .....GG.G.CGAAACUAGCA...A
Hma-1-1 .....GG.G.CGAAACAAUC...A
Hma-1-4 .....GG.G.CGAAACAAUC...A
Hma-1-7 .....GG.G.CGAAACAAUC...A
Hma-1-8 .....GG.G.CGAAACAAUC...A
Hma-1-39 .....GG.G.CGAAACAAUC...A
Ltr-1-2 .....GGG.C.CGAAACGUA...C
env-143 .....GC.C.CGAAACACU...G
env-144 .....A.CGAAACACGC...A
.....>>>>. > .> .>>>>>>>>>.
.....2222.2.2...0222222220.
-----RR•CGAAA•••••-----

```

## References

- [1] G. Ferbeyre, V. Bourdeau, M. Pageau, P. Miramontes, and R. Cedergren. Distribution of hammerhead and hammerhead-like RNA motifs through the GenBank. *Genome Research*, 10(7):1011–1019, 2000.
- [2] T. J. Macke, D. J. Ecker, R. R. Gutell, D. Gautheret, D. A. Case, and R. Sampath. RNAMotif, an RNA secondary structure definition and search algorithm. *Nucleic Acids Research*, 29(22):4724–4735, 2001.
- [3] E. P. Nawrocki, D. L. Kolbe, and S. R. Eddy. Infernal 1.0: inference of RNA alignments. *Bioinformatics*, 25:1335–1337, 2009.
- [4] Z. Weinberg and W. L. Ruzzo. Sequence-based heuristics for faster annotation of non-coding RNA families. *Bioinformatics*, 22(1):35–39, 2006.
- [5] Z. Weinberg, J. X. Wang, J. Bogue, J. Yang, K. Corbino, R. Moy, and R. R. Breaker. Comparative genomics reveals 104 candidate structured RNAs from bacteria, archaea and their metagenomes. *Genome Biol*, 11:R31, 2010.
