# Supplementary material for: Identification of Hammerhead Ribozymes in All Domains of Life Reveals Novel Structural Variations
Source: PLoS Comput Biol. 2011 May 5;7(5):e1002031. doi: 10.1371/journal.pcbi.1002031 (PMC3088659; doi:10.1371/journal.pcbi.1002031)
Supplement: Table S1 — Primers used in this study. (PDF) [file pcbi.1002031.s010.pdf]

## Oligonucleotides

In the table below, each oligonucleotide is used, and is separated by a horizontal line. The sequence is listed on the last line of text for each oligonucleotide, and is right justified. “HH” is an abbreviation for “hammerhead”; A. tumefaciens refers to *Agrobacterium tumefaciens* str. C58 (also called 1303); A. caulinodans refers to *Azhorhizobium caulinodans* ORS571.

| name                | template                                   | template (detail)                                                | Forward/Rev | sequence                                   |
|---------------------|--------------------------------------------|------------------------------------------------------------------|-------------|--------------------------------------------|
| JP_077_HH_Atu-a-F   | A. tumefaciens                             | tandem HH and flanking sequence in what is presumably a prophage | For         | TAATACGACTCACTATAGGCCGAGCTATCGGCACG        |
| JP_078_HH_Atu-b-F   | A. tumefaciens                             | tandem HH and flanking sequence in what is presumably a prophage | For         | TAATACGACTCACTATAGGCAGTCACTCAACACATTC      |
| JP_079_HH_Atu-c-F   | A. tumefaciens                             | tandem HH and flanking sequence in what is presumably a prophage | For         | TAATACGACTCACTATAGGAAGAGCTGGGAAACAAC       |
| JP_080_HH_Atu-a-R   | A. tumefaciens                             | tandem HH and flanking sequence in what is presumably a prophage | Rev         | CCCATACCGGGCCAACATG                        |
| JP_081_HH_Atu-b-R   | A. tumefaciens                             | tandem HH and flanking sequence in what is presumably a prophage | Rev         | GACCGGAGGCCAGCCGAAG                        |
| JP_082_HH_Atu-c-R   | A. tumefaciens                             | tandem HH and flanking sequence in what is presumably a prophage | Rev         | ACTCGCATCGATCCACCGACC                      |
| JP_085_HH_Atu-d-R   | A. tumefaciens                             | tandem HH and flanking sequence in what is presumably a prophage | Rev         | AGCCCGTGTGTCCAGCCC                         |
| JP_088_antiHH1-1    | pairs with HH1 cugauga from A. tumefaciens |                                                                  | Rev         | CTATTCCGCTAGCTCATCAGGCCCTAGGCGCGACCCTAGGAC |
| JP_089_antiHH1-2    | pairs with HH2 cugauga from A. tumefaciens |                                                                  | Rev         | TTTCGTGCGCTGCTCATCAGGCCCTAGGCGCGACCCTAGGAC |
| JP_090_antiHH1-3    | pairs with HH3 cugauga from A. tumefaciens |                                                                  | Rev         | GGAATGGCAACCATCATCAGGCGGGGCATGCCAAGCCCCAC  |
| JP_091_HH1_mutant-R | HH1 cugauga->cuAauga from A. tumefaciens   |                                                                  | Rev         | CTATTCCGCTAGCTCATTAGGCCCTAGGCGCGACC        |
| JP_092_HH2_mutant-R | HH2 cugauga->cuAauga from A. tumefaciens   |                                                                  | Rev         | TTTCGTGCGCTGCTCATTAGGCCCTAGGCGCGACC        |
| JP_093_HH3_mutant-R | HH3 cugauga->cuAauga from A. tumefaciens   |                                                                  | Rev         | GGAATGGCAACCATCATTAGGCGGGGCATGCCAAG        |
| JP_094_HH1_mutant-F | HH1 cugauga->cuAauga from A. tumefaciens   |                                                                  | For         | GGTCGCGCCTAGGGCCTAATGAGCTAGCGGAATAG        |

|                             |                                            |                                                                                                       |                                                                              |
|-----------------------------|--------------------------------------------|-------------------------------------------------------------------------------------------------------|------------------------------------------------------------------------------|
| JP_095_HH2_mutant-F         | HH2 cugauga->cuAauga from A. tumefaciens   | For                                                                                                   | GGTCGCGCCTAGGGCCTAATGAGCAGCGCACGAAA                                          |
| JP_096_HH3_mutant-F         | HH3 cugauga->cuAauga from A. tumefaciens   | For                                                                                                   | CTTGGCATGCCCCGCCTAATGATGGTTGCCATTCC                                          |
| JP_097_HH1-2_small-F        | shorten 3HH from A. tumefaciens (940->384) | For                                                                                                   | GAGAGATGGTCGACCTAGATCAATCCACATGTGGAAAG                                       |
| JP_098_HH1-2_small-R        | shorten 3HH from A. tumefaciens (940->384) | Rev                                                                                                   | TTGATCTAGGTCGACCATCTCTCACTCCTTCGCTATCG                                       |
| JP_099_HH_Atu-C1-R          | A. tumefaciens                             | tandem HH and flanking sequence in what is presumably a prophage(to probe first fragment, before HH1) | Rev<br>CACCAGCCAGACCGTTGAACCGCTGGCC                                          |
| JP_109_HH_Aca-a-F           | A. caulinodans                             | prophage (near tandem HH)                                                                             | For<br>taatacgactcactataggAACGGTGCAGTGACTGCAC                                |
| JP_110_HH_Aca-a-R           | A. caulinodans                             | prophage (near tandem HH)                                                                             | Rev<br>gcctcgggagagcgatcagcggtggcg                                           |
| JP_111_HH_Aca-b-R           | A. caulinodans                             | prophage (near tandem HH)                                                                             | Rev<br>gggcctcgacttctccccggagacgttcg                                         |
| JP_112_HH_Aca-c-R           | A. caulinodans                             | prophage (near tandem HH)                                                                             | Rev<br>caacctcttctcgatcaccgccaccagatc                                        |
| JP_113_HH_Aca-c2-R          | A. caulinodans                             | prophage (near tandem HH)                                                                             | Rev<br>caggggcgcggcgctctggcctcatcctcgg                                       |
| JP_123_HH_Aca-a2-F          | A. caulinodans                             | prophage (near tandem HH)                                                                             | For<br>CGGTCACAGTCCCTCGCTA                                                   |
| JP_124_HH_Aca-c3-R          | A. caulinodans                             | prophage (middle tandem HH)                                                                           | Rev<br>GATACCCCTCGCGCCA                                                      |
| JP_125_HH_Aca-b-F           | A. caulinodans                             | prophage (middle tandem HH)                                                                           | For<br>GCTTGCGGCCAACTGGTCCGCG                                                |
| JP_126_HH_PaP3-R            |                                            | entire HH                                                                                             | CATGGTCGTTTCATCCTTTAGGAATCATCAGCCGGGACACACATCCCGATACGACAAccTATAGTGAGTCGTATTA |
| JP_127_HH_Aca-a2-F-T7       | PCR from A. caulinodans prophage           |                                                                                                       | TAATACGACTCACTATAaggCGGTCACAGTCCCTCGCTA                                      |
| JP_128_HH_Atu_HH1mut-gaaa-F | HH1 gaaa -> gCaa from A. caulinodans       | For                                                                                                   | CATCGCATAACTAAGCGcAACCGGGGGGCGTCCT                                           |
| JP_129_HH_Atu_HH2mut-gaaa-F | HH2 gaaa -> gCaa from A. caulinodans       | For                                                                                                   | CATGTGGAAAGTAATGCGcAACCGGGTGTGCGTTTC                                         |
| JP_130_HH_Atu_HH3mut-gaaa-F | HH3 gaaa -> gCaa from A. caulinodans       | For                                                                                                   | CAATCCAACTGATACCGcAACCGGCTCCCTAGGG                                           |
| JP_131_HH_Atu_HH1mut-gaaa-R | HH1 gaaa -> gCaa from A. caulinodans       | Rev                                                                                                   | AGGACGCCCCCGGTTgCGCTTAGTTATGCGATG                                            |
| JP_132_HH_Atu_HH2mut-gaaa-R | HH2 gaaa -> gCaa from A. caulinodans       | Rev                                                                                                   | GAAGCGACACCCGGTTgCGCATTACTTTCCACATG                                          |
| JP_133_HH_Atu_HH3mut-gaaa-R | HH3 gaaa -> gCaa from A. caulinodans       | Rev                                                                                                   | CCCTAGGGAGCCGGTTgGGGTATCAGTTGGATTG                                           |

|                                       |                                            |                                                                     |                                                                                   |
|---------------------------------------|--------------------------------------------|---------------------------------------------------------------------|-----------------------------------------------------------------------------------|
| JP_134_HH_Aca_HH1good-F               | A. caulinodans                             | For                                                                 | GCCCCGCGAGGGCCGAAACGATAGAGGAGCTAG                                                 |
| JP_135_HH_Aca_HH1good-F               | A. caulinodans                             | Rev                                                                 | CTAGCTCCTCTATCGTTTCGGCCCTCGCGGGC                                                  |
| JP_136_HH_Aca_anti-HH1                | pairs with HH1 cugauga from A. tumefaciens | Rev                                                                 | CTCGCGGGCCTCGTCAGGCCGGGACCCTCCCCG                                                 |
| JP_137_HH_Aca_anti-HH2                | pairs with HH2 cugauga from A. tumefaciens | Rev                                                                 | CTGCCATGGGCTCATCAGTGGACCGGCATCAGGTC                                               |
| JP_138_HH_Atu_HH1-and-2_3'fragment    | A. tumefaciens                             | Tandem HH and flanking sequence in what is<br>presumably a prophage | For<br>TAATACGACTCACTATAgGTCCTAGGGTTCGCGCC                                        |
| JP_139_HH_Atu_HH3_3'fragment          | A. tumefaciens                             | For                                                                 | TAATACGACTCACTATAgGTGGGGCTTGGCATG                                                 |
| JP_140_T7-term-F                      | T7 terminator for annealing                | For                                                                 | GctagcataacccttggggcctctaaccgggtcttgaggggtttttgA                                  |
| JP_141_T7-term-R                      | T7 terminator for annealing                | Rev                                                                 | catgTCAAAAAACCCCTCAAGACCCGTTTAGAGGCCCAAGGGGTTATGCTAGCtgca                         |
| JP_142_T7-term-screen-F               | clones with T7-term                        | For                                                                 | gctaGCATAACCCCTTGG                                                                |
| JP_144_pUC19(836-821)                 | pUC19(836-821)                             | Rev                                                                 | CTGGCCTTTTGCTGGC                                                                  |
| JP_147_T7-term-screen-R               | clones with T7-term                        | Rev                                                                 | AACCCCTCAAGACCCGTT                                                                |
| JP_148_rz-JCVI_SCAF_1101668476676/866 | elongation                                 | Rev                                                                 | ggGGCGTTTCGACTTTGTCTATAGTGAGTCGTATTA                                              |
| JP_149_rz-NC_008536.1/7550346         | elongation                                 | Rev                                                                 | gGCCGTTATCGACTTACCTATAGTGAGTCGTATTA                                               |
| JP_150_rz-NC_010168.1/3000116         | elongation                                 | Rev                                                                 | gGTGGTGCAGCGTTTCGCAGCGGAGTCCTATAGTGAGTCGTATTA                                     |
| JP_151_rz-NZ_ABED02000017.1/64984     | elongation                                 | Rev                                                                 | gGCACGTCCTTGCTTTTTAGGTAATTTTAAACCTATAGTGAGTCGTATTA                                |
| JP_152_rz-NZ_ABFY02000014.1/30371     | elongation                                 | Rev                                                                 | gGCCCCGTTTCGGCTCTCCTATAGTGAGTCGTATTA                                              |
| JP_153_rz-NZ_ABLC01000053.1/26585     | elongation                                 | Rev                                                                 | gGCGGCGTTGCTGCGTGACCTATAGTGAGTCGTATTA                                             |
| JP_154_rz-NC_007497.1/12160           | elongation                                 | Rev                                                                 | ggCGCCGTTTCGACCTATTACCTATAGTGAGTCGTATTA                                           |
| JP_155_rz-JCVI_SCAF_1096626868593/854 | elongation                                 | Rev                                                                 | ggGGCGTTTCGTTCTTCCTATAGTGAGTCGTATTA                                               |
| JP_156_s-JCVI_SCAF_1101668476676/866  | elongation                                 | Rev                                                                 | TTGGTAGCCTGTCTCATTCAAGTGTGCGGTAGGCCACGTCCGACAGACGCCCTATAGTGAGTCGTATTA             |
| JP_157_s-NC_008536.1/7550346          | elongation                                 | Rev                                                                 | TCTTGGGCCTGTCTCTTCAGGCGTGGTGGGCCAGATCCACGCGACCGGCCTATAGTGAGTCGTATTA               |
| JP_158_s-NC_010168.1/3000116          | elongation                                 | Rev                                                                 | TACCTTGCTTTGACTGATCAGATCGGCCGTTGTGACTGATCCCAACCCGAAACGCTGCACCACcTATAGTGAGTCGTATTA |
| JP_159_s-NZ_ABED02000017.1/64984      | elongation                                 | Rev                                                                 |                                                                                   |

|                                      |                                                                                       |                                                                            |                          |
|--------------------------------------|---------------------------------------------------------------------------------------|----------------------------------------------------------------------------|--------------------------|
|                                      |                                                                                       | TCACAACACTAAAAGCCTGTTTCAGTTAAAGAATGTTCTATAAGCAAGGACGTGCcTATAGTGAGTCGTATTA  |                          |
| JP_160_s-NZ_ABFY02000014.1/30371     | elongation                                                                            |                                                                            | Rev                      |
|                                      |                                                                                       | GTTCTGACCTGCCTTGTCATGCGTGGGCGGTTCATCCCACACAGACGGGCCTATAGTGAGTCGTATTA       |                          |
| JP_161_s-NZ_ABLC01000053.1/26585     | elongation                                                                            |                                                                            | Rev                      |
|                                      |                                                                                       | TTTTCGACCTGCGTCGTCAGGCGTTCGATGTCCACATCGGCCGCGACGCCGCCTATAGTGAGTCGTATTA     |                          |
| JP_162_s-NC_007497.1/12160           | elongation                                                                            |                                                                            | Rev                      |
|                                      |                                                                                       | CGATGGCGCTGATCTCAGCAGTACACGCATAACGTGCAGACAGCGCCTATAGTGAGTCGTATTA           |                          |
| JP_163_s-JCVI_SCAF_1096626868593/854 | elongation                                                                            |                                                                            | Rev                      |
|                                      |                                                                                       | TTCTTGAGCTATCTCATCAGTTAGAACTTCAGCTCTGTTCTAAGACGCCCCCTATAGTGAGTCGTATTA      |                          |
| JP_164_Azo-other-phage-F             | Azorhizobium caulinodans                                                              | prophage head gene (2467000-2467500)                                       | For                      |
|                                      |                                                                                       |                                                                            | GCGCTCTACTGGAACCTCTG     |
| JP_165_Azo-other-phage-R             | Azorhizobium caulinodans                                                              | prophage head gene (2467000-2467500)                                       | Rev                      |
|                                      |                                                                                       |                                                                            | GCTGGTCTTGGCGTCCTC       |
| JP_166_Bce-HH-F                      | Bacillus cereus ATCC 14579                                                            | >gi 30018278:2631880-2634325                                               | For                      |
|                                      |                                                                                       |                                                                            | TAAAACGATTAATTCCTTTGGTTC |
| JP_167_Bce-HH-R                      | Bacillus cereus ATCC 14579                                                            | >gi 30018278:2631880-2634325                                               | Rev                      |
|                                      |                                                                                       |                                                                            | ATCTTTCAGCCCCCCTAAA      |
| JP_168_Bce-HH-F                      | Bacillus cereus ATCC 14579                                                            | >gi 30018278:2631880-2634325                                               | For                      |
|                                      |                                                                                       | TAATACGACTCACTATAggTAAAACGATTAATTCCTTTGG                                   |                          |
| JP_178_rz8-mut_C->U                  | use with substrate JP_163_s-JCVI_SCAF_1096626868593/854 (or other)                    |                                                                            | Rev                      |
|                                      |                                                                                       | ggGGCGTTTCATTCTTCCTATAGTGAGTCGTATTA                                        |                          |
| JP_179_rz8-mut_C->G                  | use with substrate JP_163_s-JCVI_SCAF_1096626868593/854 (or other)                    |                                                                            | Rev                      |
|                                      |                                                                                       | ggGGCGTTTCCTTCTTCCTATAGTGAGTCGTATTA                                        |                          |
| JP_180_rz8-mut_+U-A_bp               | use with substrate JP_163_s-JCVI_SCAF_1096626868593/854 (or other)                    |                                                                            | Rev                      |
|                                      |                                                                                       | ggGGCGTTTCGATCTTCCTATAGTGAGTCGTATTA                                        |                          |
| JP_181_s8-mut_pk-4                   | use with Rz JP_155_rz-JCVI_SCAF_1096626868593/854 (or other)                          |                                                                            | Rev                      |
|                                      |                                                                                       | TATCTCATCAGTTAGAACTTCAGCTCTGTTCTAAGACGCCCCCTATAGTGAGTCGTATTA               |                          |
| JP_182_s8-mut_-extra                 | use with Rz JP_155_rz-JCVI_SCAF_1096626868593/854 (or other)                          |                                                                            | Rev                      |
|                                      |                                                                                       | GAGCTATCTCATCAGTTAGAACTTCAGCTCTGTTCTAAGACGCCCCCTATAGTGAGTCGTATTA           |                          |
| JP_183_s8-mut_pk-2                   | use with Rz JP_155_rz-JCVI_SCAF_1096626868593/854 (or other)                          |                                                                            | Rev                      |
|                                      |                                                                                       | GCTATCTCATCAGTTAGAACTTCAGCTCTGTTCTAAGACGCCCCCTATAGTGAGTCGTATTA             |                          |
| JP_184_Bce-HH-T7-R                   | Bacillus cereus ATCC 14579                                                            | >gi 30018278:2631880-2634325                                               | Rev                      |
|                                      |                                                                                       | TAATACGACTCACTATAggATCTTTCAGCCCCCCTAAA                                     |                          |
| JP_185_s8-mut_spacer+1               | use with Rz JP_155_rz-JCVI_SCAF_1096626868593/854 (or other, like JP_180 to see P2=2) |                                                                            | Rev                      |
|                                      |                                                                                       | GAGCTATTCTCATCAGTTAGAACTTCAGCTCTGTTCTAAGACGCCCCCTATAGTGAGTCGTATTA          |                          |
| JP_186_s8-mut_P1+2bp                 | use with Rz JP_155_rz-JCVI_SCAF_1096626868593/854 (or other, like JP_180 to see P2=2) |                                                                            | Rev                      |
|                                      |                                                                                       | GAGCTATCTCATCAGTTAGAAC gg TT CAGCTC T cc GTTCTAAGACGCCCCCTATAGTGAGTCGTATTA |                          |

|                                   |                                                                                             |                                                    |                                                                                                       |
|-----------------------------------|---------------------------------------------------------------------------------------------|----------------------------------------------------|-------------------------------------------------------------------------------------------------------|
| <b>JP_187_s8-mut_L1-5'-1</b>      | use with Rz JP_155_rz-<br>JCVLSCAF_1096626868593/854 (or other,<br>like JP_180 to see P2=2) | Rev                                                | GAGCTA TCTCATCAGTTAGAAC TT CAGCTC GTTCTAAGACGCCCCCTATAGTGAGTCGTATTA                                   |
| <b>JP_188_s8-mut_L1-3'-2</b>      | use with Rz JP_155_rz-<br>JCVLSCAF_1096626868593/854 (or other,<br>like JP_180 to see P2=2) | Rev                                                | GAGCTA TCTCATCAGTTAGAAC CAGCTC T GTTCTAAGACGCCCCCTATAGTGAGTCGTATTA                                    |
| <b>JP_189_s8-mut_spacer-1</b>     | use with Rz JP_155_rz-<br>JCVLSCAF_1096626868593/854 (or other)                             | Rev                                                | GAGCTACTCATCAGTTAGAACTTCAGCTCTGTTCTAAGACGCCCCCTATAGTGAGTCGTATTA                                       |
| <b>JP_190_s8-mut_pk-6</b>         | use with Rz JP_155_rz-<br>JCVLSCAF_1096626868593/854 (or other)                             | Rev                                                | TCTCATCAGTTAGAACTTCAGCTCTGTTCTAAGACGCCCCCTATAGTGAGTCGTATTA                                            |
| <b>JP_191_HH_Bcl-F</b>            | Bacillus clausii                                                                            | CDS of spore germination protein KC For<br>(gerKC) | AGGAGGGAGATGATTATGTGTTG                                                                               |
| <b>JP_192_HH_Bcl-R</b>            | Bacillus clausii                                                                            | CDS of spore germination protein KC Rev<br>(gerKC) | GGATCATTTTCCGTAACGATTC                                                                                |
| <b>JP_193_HH_Bcl-T7-F</b>         | Bacillus clausii                                                                            | CDS of spore germination protein KC For<br>(gerKC) | TAATACGACTCACTATAGGAGGGAGATGATTATGTGTTG                                                               |
| <b>JP_194_PaP3-R</b>              | PaP3 phage                                                                                  | potential type3 HH at end of genome Rev            | GACGCAGCTTTTTTGTCAAGA                                                                                 |
| <b>JP_195_PaP3-F</b>              | PaP3 phage                                                                                  | potential type3 HH at end of genome For            | TACGCCAATGCCAAGGTT                                                                                    |
| <b>JP_196_PaP3-T7-F</b>           | PaP3 phage                                                                                  | potential type3 HH at end of genome For            | TAATACGACTCACTATAGGTACGCCAATGCCAAGGTT                                                                 |
| <b>JP_199_Csc_2HH-F</b>           | Clostridium scindens                                                                        | tandem HH For                                      | GGTACGACGAGCATCTTGAA                                                                                  |
| <b>JP_200_Csc_2HH-T7-F</b>        | Clostridium scindens                                                                        | tandem HH For                                      | TAATACGACTCACTATAGGTACGACGAGCATCTTGAA                                                                 |
| <b>JP_201_Csc_2HH-R</b>           | Clostridium scindens                                                                        | tandem HH Rev                                      | TGCCTGTATGTCTTTTCCGG                                                                                  |
| <b>JP_202_Bcep176-(7)cis-HH-R</b> | elongation                                                                                  | Rev                                                | TGGCGCTGATCTCAGCAGTACACGCATAACGTGCAGACAGCGGGCCGTTACTACGTCTTCCTCCCGCCGTTTCGACCTATTTCCTATAGTGAGTCGTATTA |
| <b>JP_209_AgroH1-Rz-R</b>         | elongation                                                                                  | Rev                                                | GGCCCGGTTTCGCTTAGTTATGCCTATAGTGAGTCGTATTA                                                             |
| <b>JP_210_AgroH1-subs-F</b>       | elongation                                                                                  | For                                                | TAATACGACTCACTATAGGCTCGGTGCTCCTAGGGTCGCGCCTAG                                                         |
| <b>JP_222_Rz?-F</b>               | elongation                                                                                  | For                                                | TAATACGACTCACTATAgGtCAtCtGAtGACCACCAAtGAtCtAtCAG                                                      |
| <b>JP_223_Rz?-R</b>               | elongation                                                                                  | Rev                                                | GATTCAGTCACCCGAAGGCGATCTTCACAGACTGATAGATCATTGGTGGT                                                    |
| <b>JP_233_Csc2_2HH-F</b>          | Clostridium scindens                                                                        | tandem HH For                                      |                                                                                                       |

|                                   |                                                                                                                                      |                                   |     |                                                                                                               |
|-----------------------------------|--------------------------------------------------------------------------------------------------------------------------------------|-----------------------------------|-----|---------------------------------------------------------------------------------------------------------------|
|                                   |                                                                                                                                      |                                   |     | GGGAACGGGTTCTCC                                                                                               |
| JP_234_Csc2_2HH-T7-F              | Clostridium scindens                                                                                                                 | tandem HH                         | For | TAATACGACTCACTATAGGGAACGGGTTCTCC                                                                              |
| JP_235_Csc2_2HH-R                 | Clostridium scindens                                                                                                                 | tandem HH                         | Rev | GGAGTTTCCCTTGCTGC                                                                                             |
| JP_236_16S(large)-F               | 16S rRNA from bacteria                                                                                                               |                                   | For | agagtttgatcctggctcag                                                                                          |
| JP_237_16S(large)-R               | 16S rRNA from bacteria                                                                                                               |                                   | Rev | ggytaccttggtacgactt                                                                                           |
| JP_238_Csc-16S-F                  | Clostridium scindens                                                                                                                 | 16S rRNA                          | For | gcaacctgccttgcaact                                                                                            |
| JP_239_Csc-16S-R                  | Clostridium scindens                                                                                                                 | 16S rRNA                          | Rev | accgaatggccttgcca                                                                                             |
| JP_240_Atu-HH1-substr-R           | Agrobacterium                                                                                                                        | 3HH region                        | Rev | GGCCACCCGCCTTA                                                                                                |
| JP_245_Csc-between-2HH-R          | Clostridium scindens                                                                                                                 | sequence between both HH in phage | Rev | CGCCTCTGTTCCGGCTGAATTTACCG                                                                                    |
| JP_246_Csc-before-2HH-R           | Clostridium scindens                                                                                                                 | sequence before first HH in phage | Rev | CTGCTGCCCCGTTTCGGCTTTTA                                                                                       |
| JP_254_Atu-HH1-T7-F               | Agrobacterium                                                                                                                        | first HH of 3HHs                  | For | TAATACGACTCACTATAggCTCGGTCGTCCTAGGGTC                                                                         |
| JP_260_Rz_JCVI_scaf_1096626965523 | elongation                                                                                                                           |                                   | Rev | GGCAGTGAGTGAGTTTCGCCTATAGTGAGTCGTATTA                                                                         |
| JP_261_S_JCVI_scaf_1096626965523  | elongation                                                                                                                           |                                   | Rev | AATGACCTGGCTCTTCAGGGCAGGGAGGTCATCCCACTGCCGACTCACTCACTGCCTATAGTGAGTCGTATTA                                     |
| JP_266_t3-pk13                    | elongation                                                                                                                           |                                   | Rev | GCGTGTTTCGTCCCCCTCTGGACCCTACTCGTCAGGGCCACGGACGAGGTCCAGAAGGGGGCCGTGGCCGACACGCCTATAGTGAGTCGTATTA                |
| JP_267_t3-weak                    | elongation                                                                                                                           |                                   | Rev | TTCCCTTTCGTGGTAACTCATCAGGGCAGACTACCAATGCCTGCCGAGGGGAAccTATAGTGAGTCGTATTA                                      |
| JP_268_t3-Droso                   | elongation                                                                                                                           |                                   | Rev | TAGACTGTTTCGGAAGACACCACTCTTCCTCATCAGCGATCTTTTCTTTTCAATAATGAAAAAGATGGTAAATCGGACAGCCTAccTATAGTGAGTCGTATTA       |
| JP_269_t1-mouse-gut-weak          | elongation                                                                                                                           |                                   | Rev | TTATGGTACTATCCCCGACTACCCTTGTTTGGGTAGTTTCGCCGGCTCTCACCGTTGCTCATCAGGGGATTTATTCGGTAccTATAGTGAGTCGTATTA           |
| JP_270-t1-Cenarchaeum             | elongation                                                                                                                           |                                   | Rev | AGCAATAAATGCCACAGACACGGCACCGGTGGTCTGGCGCCGTGTTTCGTCCACATAGGACTCGTCAGTATGGCTGCCGGGATAccTATAGTGAGTCGTATTA       |
| JP_271_t1-Salern                  | elongation                                                                                                                           |                                   | Rev | TGCCGTGGCTACCGCGACGGGGCACGAGGCCCCGTTTCGCCCGCGCCAAGCGGGCTCGTCAGGCGGCTATGAGGTGAccTATAGTGAGTCGTATTA              |
| JP_272_t1-Yarrowia                | elongation                                                                                                                           |                                   | Rev | TTATGACTAGTGGCTGCCGACACCAACAGCCCCCACTGTTGATGTTTCGACGCTAGTCATGGGTTTGTTCTCATCAGGGCAGCCAGTCCCCCTATAGTGAGTCGTATTA |
| JP_273_t2-UAAA                    | elongation                                                                                                                           |                                   | Rev | GTGTCGGCCTGTCTCATCAGTGACGCGCGGCCATATGCGCCAGACCCCGCCGGGGCGGGGTTTAGACcTATAGTGAGTCGTATTA                         |
| JP_274_t2-CUAAAGA                 | elongation                                                                                                                           |                                   | Rev | AAAATCACGTTACAGCCTCTTTAGCACACGCCAGACGTGCGGACGCCCCGAAGGGCGTTTCGGCCTGTCAAGCcTATAGTGAGTCGTATTA                   |
| JP_275_s8-mut_pk-swap             | use with Rz JP_155_rz-<br>JCVI.SCAF_1096626868593/854 (or other)<br>GtcgaATCTCATCAGTTAGAACTTCAGCTCTGTTCTAAGACGCCCCCTATAGTGAGTCGTATTA |                                   | Rev |                                                                                                               |

|                                          |                                                                                                                                     |                                                      |
|------------------------------------------|-------------------------------------------------------------------------------------------------------------------------------------|------------------------------------------------------|
| <b>JP_276_s8-mut_pk-comp</b>             | use with Rz JP_155_rz-<br>JCVLSCAF_1096626868593/854 (or other)<br>GtcgaATCTCATCAGTTAGAACTTCtcgaCTGTTCTAAGACGCCCCCTATAGTGAGTCGTATTA | Rev                                                  |
| <b>JP_277_t1-X.phage(cugaagU)-R</b>      | elongation<br>CCGCCGACCTGACCCCTGTATGGGGCCAGGTTTCGTCCGAGGTTAACTTACTCGGTCACTTCAGCGTCACGAACCTTCCTATAGTGAGTCGTATTA                      | NC_007024.1/490-419<br>Rev                           |
| <b>JP_278_t1-Aedes(cuUacgaa)-R</b>       | elongation<br>CTAAATGCTTATCTCTGACAGATACGCGTATTTTCGACTACAATTTGCAGTCTTCGTAAGTGTGACGCCTATAGTGAGTCGTATTA                                | NW_001810328.1/53176-53230<br>Rev                    |
| <b>JP_279_t1-Aspergi(cugacUa-gaaG)-R</b> | elongation<br>GTCAGAGCTACGGTGACTGTGGCCCTCCTTAAGAGCAGGCTTCAATCAGTCATATCTTCGTGATCTAGTCAGACGGTCACCGACTTGTCTTCCTATAGTGAGTCGTATTA        | NT_107005.1/1253669-1253736<br>Rev                   |
| <b>JP_280_t1-Ep.viroid(-G-)-R</b>        | elongation<br>TAAAGCTCTACCCCATGGCAGAACCCCATTTTCGTCTTTTGGACTCATCAGGGGTGGTACACACCTATAGTGAGTCGTATTA                                    | NC_004728.1/11-64<br>Rev                             |
| <b>JP_281_t1-Aedes(cCgauga)-R</b>        | elongation<br>AGAGTTTGTATTCTTCGACAGATACGCGTATTTTCGACCTCAACTGTAAGGCCGTCTTCGGTGTGCGAAGAAGACGGTCTTACAGTTTCcTATAGTGAGTCGTATTA           | NZ_AAGE02023894.1/13988-14043<br>Rev                 |
| <b>JP_282_t1-Bos(Uaaa)-R</b>             | elongation<br>ATTTTCTAACCCACAAACACTCTGGAATATGGCAAGAGAGTGTTTAGCAAAAGGTAGCCAACTGCTCTTCAGTGTAAGATGTTGCTTCcTATAGTGAGTCGTATTA            | NW_001494989.2/1604723-1604611<br>Rev                |
| <b>JP_283_t1-Monodelphis(UaaC)-R</b>     | elongation<br>CACCTTTGAGACGTTGCTTCACTTCTGGGATTCACTTTCTTCATAGG                                                                       | NW_001581879.1/85484827-85484696<br>Rev              |
| <b>JP_284_t1-Macaca(gaaG)-R</b>          | elongation<br>CCAGAGAAACCACTGGAAGCCCCAGTGTTATGGCAATGCCAGGGCTTCAGGCATTACCTTCTTCAGTCCAATGGTCCCCAACCTATAGTGAGTCGTATTA                  | NW_001124105.1/14934-15038<br>Rev                    |
| <b>JP_285_t1-Yarrowia(gGaa)-R</b>        | elongation<br>GATATGTTTCGAACCACTGGCTGTCTACACTACAGTTAGCAGTGTTCCGACGCTTGCTCTCGGGTTCGTCTCATCAGGACAGCTAGGGGGCcTATAGTGAGTCGTATTA         | NC_006068.1/1043901-1044007<br>Rev                   |
| <b>JP_286_t1-Monodelphis(UaaC)-F</b>     | elongation<br>TAATACGACTCACTATAGGCCATCTTTGATGTTCTGATGAGTGTTGGGTAAGATCTCACACTAACTTCCTTCTTTACCTATGAAGAACTGAATC                        | NW_001581879.1/85484827-85484696<br>For              |
| <b>JP_287_+5-Bcep176-(7)cis-HH-F</b>     | Bcep176 previous PCR<br>TAATACGACTCACTATAGcctcgtaataggtcgaaacggcgagg                                                                | Rev                                                  |
| <b>JP_288_+5-Bcep176-(7)cis-HH-R</b>     | Bcep176 previous PCR<br>GCGCTGATCTCAGCAGtac                                                                                         | Rev                                                  |
| <b>JP_289_manHH-t2-A-F</b>               | human genome<br>TATTTATAGAAGGACATTCATAG                                                                                             | Chr14-pos59056349(intron of neurexin2)<br>For        |
| <b>JP_290_manHH-t2-B-T7-F</b>            | human genome<br>TAATACGACTCACTATAGGACATTCATAGTGCTAGAGG                                                                              | Chr14-pos78890872(intron of neurexin2)<br>For        |
| <b>JP_291_manHH-t2-A-R</b>               | human genome<br>CATCCTGCTTCCCTCCAAAGG                                                                                               | Chr14-pos78890872(intron of neurexin2)<br>Rev        |
| <b>JP_292_manHH-t2-B-R</b>               | human genome<br>GGTAATACCTGAATCATCAGC                                                                                               | Chr14-pos78890872(intron of neurexin2)<br>Rev        |
| <b>JP_293_manHH-t1-RECK-A-F</b>          | human genome<br>TCACAGTAGATTTGAGCCG                                                                                                 | Chr9-36072672(intron of RECK)<br>For                 |
| <b>JP_294_manHH-t1-RECK-B-T7-F</b>       | human genome<br>TAATACGACTCACTATAGGCCGTTACCTGCAGCTGATG                                                                              | Chr9-36072672(intron of RECK)<br>For                 |
| <b>JP_295_manHH-t1-RECK-A-R</b>          | human genome<br>TTAATACTATCTTAAGCCAGTAC                                                                                             | Chr9-36072672(intron of RECK)<br>Rev                 |
| <b>JP_296_manHH-t1-RECK-B-R</b>          | human genome<br>GCCAGTACTGCAGGACCTAATAG                                                                                             | Chr9-36072672(intron of RECK)<br>Rev                 |
| <b>JP_297_manHH-t1-c10-A-F</b>           | human genome<br>AAATTGTTTCTTGACCAGTTGC                                                                                              | Chr10-115928020(intron in 5'UTR of c10orf118)<br>For |

|                                      |              |                                                      |                                                                                                      |
|--------------------------------------|--------------|------------------------------------------------------|------------------------------------------------------------------------------------------------------|
| <b>JP_298_manHH-t1-c10-B-T7-F</b>    | human genome | Chr10-115928020(intron in 5'UTR of For<br>c10orf118) | TAATACGACTCACTATAAggagttgcctacagctgatgagctc                                                          |
| <b>JP_299_manHH-t1-c10-A-R</b>       | human genome | Chr10-115928020(intron in 5'UTR of Rev<br>c10orf118) | TGTTTTCTGTTTCTGACACAGTACTAC                                                                          |
| <b>JP_300_manHH-t1-c10-B-R</b>       | human genome | Chr10-115928020(intron in 5'UTR of Rev<br>c10orf118) | CACAGTACTACAGGACCAATTC                                                                               |
| <b>JP_301_Danio-no-P2-R</b>          | elongation   | Danio rerio                                          | Rev<br>ggTCCACCCATTTCCATCAGAGCAATGCTTCATTGCcGATGGGTGGAccTATAGTGAGTCGTATTA                            |
| <b>JP_302_chimp-no-P2-R</b>          | elongation   | Pan troglodytes                                      | Rev<br>ggATTCCATTTCTCTTCAGAGTGGAGATCCCCACTGATGGAATccTATAGTGAGTCGTATTA                                |
| <b>JP_303_Aedes-typical-R</b>        | elongation   | NW_0018112881/397739-397685                          | Rev<br>CTGTGACAGATACACGTATTTTCGACTACTACTTGTAGTCTTCTTCAGTGTcAGTTACTCGTATCCTATAGTGAGTCGTATTA           |
| <b>JP_304_Nematostella-typical-R</b> | elongation   | NZ_ABAV01012423.1/13414-13365                        | Rev<br>aacTAACCATGGACAGCTGTTTTCGTCCTTGTTAGGACTCGTCAGCATGGCATAccTATAGTGAGTCGTATTA                     |
| <b>JP_318_t2-env-(A-U)to(U-A)</b>    | elongation   | to obtain A15-U16 U16-A15 mutant                     | Rev<br>TTGTTAGCCAGTCTCATCAGTACGGGTAGGCTAGTTCCCGCAGTCACCCCGAAGGGTGATTTCGACTTAGTTAGccTATAGTGAGTCGTATTA |
| <b>ZW_093</b>                        | elongation   |                                                      | Rev<br>TTACCTATTCCGCTAGCTCATCAGGCCCTAGGCGCGACCCT                                                     |
| <b>saltern 1 trunc B</b>             | elongation   | to obtain Hhmeta                                     | For<br>TAATACGACTCACTATAGGTCTTTAGGCGCCTGACGAGGCCCGTGTGGGGCCGAAAC                                     |
| <b>saltern 2 trunc A</b>             | elongation   | to obtain Hhmeta                                     | Rev<br>TTGGCTAAGGCTACGGGGCTGACGCCCCGTTTCGGCCCCACACGGGCC                                              |
